# Supplementary material for: High Expression of Interleukin-2 Receptor Subunit Gamma Reveals Poor Prognosis in Human Gastric Cancer
Source: J Oncol. 2021 Jan 21;2021:6670834. doi: 10.1155/2021/6670834 (PMC7843183; doi:10.1155/2021/6670834)
Supplement: Supplementary Materials — Table S1: characteristics of the patients diagnosed with gastric cancer. Table S2: information of raw sequencing reads and mapping. Figure S1: sequencing samples comparison based on the expression levels of transcripts per million (TPM). N, normal gastric tissues. T, tumor. F, female. M, male. Figure S2: cytokine-cytokine receptor interaction (CCRI) pathway map based on the DEGs between GC and adjacent non-GC gastric tissues. Figure S3: the regulation network of TF-DEG and miRNA-DEG.A. Figure S4: molecular docking results of resatorvid and IL2RG. A. The files named deg_N_T_tpm.txt, deg_NF_TF_tpm.txt, and deg_NM_TM_tpm.txt contain the DEGs and related statistical information. [file 6670834.f1.zip]

Archive with 5 entries (5 files):
- 6670834.f1/~$pplemental description_6670834.docx
- 6670834.f1/deg_N_T_tpm.txt
- 6670834.f1/deg_NF_TF_tpm.txt
- 6670834.f1/deg_NM_TM_tpm.txt
- 6670834.f1/supplementary material-R1.DOCX
