# Supplementary material for: High Expression of Interleukin-2 Receptor Subunit Gamma Reveals Poor Prognosis in Human Gastric Cancer
Source: J Oncol. 2021 Jan 21;2021:6670834. doi: 10.1155/2021/6670834 (PMC7843183; doi:10.1155/2021/6670834)
Supplement: Supplementary Materials — Table S1: characteristics of the patients diagnosed with gastric cancer. Table S2: information of raw sequencing reads and mapping. Figure S1: sequencing samples comparison based on the expression levels of transcripts per million (TPM). N, normal gastric tissues. T, tumor. F, female. M, male. Figure S2: cytokine-cytokine receptor interaction (CCRI) pathway map based on the DEGs between GC and adjacent non-GC gastric tissues. Figure S3: the regulation network of TF-DEG and miRNA-DEG.A. Figure S4: molecular docking results of resatorvid and IL2RG. A. The files named deg_N_T_tpm.txt, deg_NF_TF_tpm.txt, and deg_NM_TM_tpm.txt contain the DEGs and related statistical information. [file 6670834.f1.zip › 6670834.f1/deg_N_T_tpm.txt]

GeneID	symbol	log2FC	lfcSE	pvalue	padj	N-M-700963	N-M-697023	N-M-699732	N-M-693915	N-F-700699	N-F-696970	T-M-695799	T-M-693915	T-M-698012	T-M-700963	T-M-703596	T-F-697023	T-F-700699
ENSG00000170373.8	CST1	-6.61328330389164	0.760622374060515	3.48150435096227e-18	8.61498251645613e-14	0.110401	0.173645	0.0910533	0.0699754	0.0835312	0.854098	3.75021	2.56823	91.511557	423.233	140.316	183.341	50.3724
ENSG00000159184.7	HOXB13	-6.39790779717016	0.753180598561188	1.98752252941069e-17	2.45906224951337e-13	0	0	0	0.0120034	0	0.012122	1.95433	0.166678	2.0649	0.333955	3.08684	0.929139	5.31302
ENSG00000105464.3	GRIN2D	-4.89766144781309	0.622184276239807	3.49793693876554e-15	2.88521498499178e-11	0.154069	0.0496081	0.0520167	0.176324	0.241248	0.202249	16.4128	0.343936	3.31784	7.53572	2.97483	16.2822	7.45054
ENSG00000170689.9	HOXB9	-5.96098918486419	0.78382406387308	2.84883716926353e-14	1.17490792922377e-10	0.126644	0	0	0.0164694	0.0396121	0.099848	4.53017	0.124766	69.6797	6.19603	3.75659	16.2487	13.4772
ENSG00000253293.4	HOXA10	-4.65028484537152	0.610170476640309	2.51157143127354e-14	1.17490792922377e-10	0.2881973	0.0929721	0	0.1056671	0.429582	0.0762505	9.791999	1.053668	14.650889	5.040014	4.452238	7.3524598	8.043004
ENSG00000005073.5	HOXA11	-5.54957057794027	0.728605853989769	2.60247736353557e-14	1.17490792922377e-10	0	0	0	0	0.0486649	0	1.616671	0.425429	2.086583	0.14545	2.048699	0.929349	1.283970415058
ENSG00000240990.10	HOXA11-AS	-5.89938160614476	0.806889015182816	2.64633683379273e-13	9.35480070745731e-10	0	0	0	0	0	0	3.0639265	0.15941679	5.614944	0.5096181	2.5688146	2.355728	4.078857
ENSG00000139540.11	SLC39A5	-5.05480841972815	0.719854781322562	2.18740323627841e-12	6.76591163521365e-09	0.1077982	0.1449238	0.2312797	0.6151305	0.1295087	0.445371000634137	28.851876	2.7353187145	38.360057	51.64079	2.051357	0.747746	45.273922
ENSG00000272763.1	AC103702.2	-4.59648701019271	0.657386013294921	2.70865576891672e-12	7.44729855576048e-09	0.548807	0	0.095231	0.2142551	0.131827	0.222708	4.13168	0.324137	11.000636	3.18373	10.305773	8.375556	16.835163
ENSG00000253187.2	HOXA10-AS	-5.44765456331782	0.799389812657287	9.44172828871286e-12	2.336355665042e-08	0	0	0	0	0	0.0427793	3.719524	0.178643	2.414963	0.907935	1.25511	11.163001	1.24291
ENSG00000123388.4	HOXC11	-5.44860588909994	0.802953579778916	1.15521217831217e-11	2.59870230475769e-08	0	0	0	0.0213226	0.0154145	0.0215581	1.902934	0.5116229	3.238129	2.824788	1.570893	0	7.337172
ENSG00000125207.7	PIWIL1	-4.92495803746562	0.727281475872987	1.27246318884018e-11	2.62392513398751e-08	0.013594	0.0131324	0	0.0321557	0.0127668	0.0214206	1.7440812	0.026779	2.33283	0.1639748	2.7011828	65.2398	1.034332
ENSG00000106031.8	HOXA13	-5.49300147297347	0.822278778442273	2.38587116240442e-11	4.54141399336133e-08	0	0	0	0.008143595	0.009805451	0	2.882188053	0.08222862	1.3505161	0.29903288	1.2248728	0.00984256	2.0076421
ENSG00000119547.5	ONECUT2	-4.64264070280409	0.70181910149829	3.71167768651926e-11	6.5603903109228e-08	0.0315671	0.00914605	0.0287704	0.103457	0.00890443	0.136657	6.71587	0.217578	1.2189	7.55502	1.34979	2.50085	0.812435
ENSG00000122012.13	SV2C	3.62249547524162	0.551262530601648	4.98875699579593e-11	8.10800250125262e-08	0.677216	0.295674	0.704614	0.126683	0.0654099	0.4520376	0.010981	0.0365399	0.00444467	0.016107	0.0463217	0.05065551	0.014875
ENSG00000275713.2	HIST1H2BH	-4.29313197352601	0.654054160377563	5.2425960808261e-11	8.10800250125262e-08	0.0540386	0.0783328	0.0821356	0.337311	0.0760099	0.511539	6.3532	0.452596	5.10678	8.00311	2.18374	14.3813	12.7031
ENSG00000230316.6	FEZF1-AS1	-5.14969524959692	0.810888014608761	2.1435670329871e-10	3.12015095478034e-07	0.0884512	0	0.10648	0.0159861	0.0192261	0	14.33829	0.34931	10.66196	0.0769439	5.617769	0.47318	4.350574
ENSG00000123500.9	COL10A1	-5.07256202843919	0.801909713682959	2.52246521684963e-10	3.46768898838578e-07	0.309123	0.0314365	0.0494441	0.0634749	0.1833	0.0749504	0.0744929	0.897461	86.085543	22.7248	15.98121	3.93764	0.642427
ENSG00000137251.15	TINAG	-4.56303346723875	0.723251134449554	2.80738625377275e-10	3.65625120261088e-07	0	0	0	0.0955355	0	0.194964	2.108639	0.7123713	5.67077	2.158992	0.491349	1.17472025	4.31442
ENSG00000198576.3	ARC	5.1812619501334	0.830975327560598	4.51324106762473e-10	5.58400751091869e-07	6.06744	75.06094	8.00196	0.199782	154.02583	0.423487	0.187603	1.09896	0.0526131	0.238233	0.265698	0.0345343	0.0293069
ENSG00000234155.1	LINC02535	-4.66606923582482	0.777420958175829	1.94919239537339e-09	2.29679837254831e-06	0.0434556	0.104972	0.0440273	0.0508607	0	0.0342631	8.69232	0.021406	5.56423	0.320801	0.414328	6.99904	3.15059
ENSG00000196335.12	STK31	-3.19602938710806	0.537767389803002	2.79605488553859e-09	3.14492627921148e-06	0.0654718	0.1564762	0.1100506	0.41463749	0.0652438	0.0959094	2.232178	0.348399	2.23679	3.065137893	2.2282215	3.234762	0.7496561
ENSG00000180818.4	HOXC10	-4.72561124913545	0.797504150029789	3.11347614570176e-09	3.34969422719087e-06	0.0289492	0	0	0	0.0682255	0.2288149	10.30422	0.2886706	0.6575773	11.762469	9.00656	0.742017	5.906564
ENSG00000243766.8	HOTTIP	-4.95208576519382	0.839115558371544	3.60093560501843e-09	3.71271464775755e-06	0	0	0	0	0	0	0.774001	0.1011032	0.7056246	0.1168759	0.458138	0.1277389	1.570173
ENSG00000105251.10	SHD	-3.74593985455458	0.637415613152046	4.18369024138034e-09	4.14101660091826e-06	0.0328682	0.167658	0.0214206	0.1919554	0.123203	0.111798	4.3801908	0.4295415	2.4390849	0.908687	1.4348457	1.477404	3.948185
ENSG00000228630.5	HOTAIR	-4.99275315728391	0.862012669547642	6.95647846002273e-09	6.62069459589471e-06	0	0	0	0	0	0	0.627103	0.360834	1.54099	0.4619406	1.39722	0	3.631905
ENSG00000078399.17	HOXA9	-3.39445685428474	0.588966518783256	8.243011513612e-09	7.55456740386403e-06	0.2038381	0.0814488	0.10345	0.1969422	0.3581028	0.2802949	1.3203139	0.821031	6.795302	1.503184	0.862629	4.00954	7.6603793
ENSG00000249550.6	LINC01234	-4.6291083506608	0.812052074235343	1.19451785170655e-08	1.05565515144567e-05	0.05743237	0	0.0269722	0.0207693	0.037141	0.0209973	4.921041	0.0786845	1.124337	6.017096	0.5796724	0	3.522197
ENSG00000213578.5	CPLX3	4.48617397958909	0.796777852562456	1.79797447641575e-08	1.53416822134165e-05	18.3204	3.09214	22.943	0.0833422	0.0857265	0.299902	0.246529	0.0263118	0.124304	0.09278	0.0506534	0.173046	0.0461862
ENSG00000263934.4	SNORD3A	-3.48781841159111	0.629185265682148	2.96673493876387e-08	2.44706186865707e-05	20.1398100832511	5.744173	21.0426600110577	64.464660540458	23.1028600227611	15.105570152125	133.693371038343	35.813950443485	1601.7374	179.005300312736	363.842480144882	327.873210048507	700.82472
ENSG00000180178.10	FAR2P1	-4.51150295368754	0.823479817101223	4.28744205515815e-08	3.42234689209318e-05	0.0284333	0.0135126	0.0429705	0.0109533	0	0	0.3912574	0.0275544	0.4876414	1.3491493	5.914699	0.0131978	1.5331645
ENSG00000124762.13	CDKN1A	2.58640386443036	0.475678144476732	5.40945969283759e-08	4.17608520565862e-05	296.198492	800.7578	509.031083	50.50596	830.98917	183.120706	64.568239	48.266334	65.306964	91.79093	59.635434	95.039328	69.44
ENSG00000234906.9	APOC2	-3.67681072969215	0.676866354759976	5.56923870627336e-08	4.17608520565862e-05	0.571967	0.691451	0.6527223	1.65298	0.0689214	2.49702	5.151009	1.279011	26.893787	37.841701	8.85327916271	31.14419	60.720871
ENSG00000106384.11	MOGAT3	-4.42218573120022	0.816227498908515	6.0325122246112e-08	4.390426911706e-05	0.0685488	0.0251372	0	0.267412	0.0243952	0.266733	8.141421	0.30450833	23.971701	2.2724606	0.0447975	7.722674	23.733359
ENSG00000203288.3	TDRKH-AS1	-2.54467984526992	0.477565240225466	9.90574933985618e-08	7.00336478327832e-05	0.35642	0.128011	0.156332	0.291622	0.00421767	0.359237	2.58019	1.06376	2.39363	1.067513	0.948094	2.314095	1.344029
ENSG00000137193.13	PIM1	2.53858885962973	0.482184669633841	1.40368970505627e-07	9.64841715322708e-05	85.36086	457.15542	164.42797	31.82244	358.98624	113.5396	22.438826	36.362843	26.76558	43.71612	24.387462	37.780898	44.41373
ENSG00000230061.2	TRPM2-AS	-4.2098449319932	0.802159063867201	1.53640587619527e-07	0.000102752333530951	0.2761086	0	0.132193	0.101464	0	0.103606	14.24894	0.4085283	7.33854	0.426699	7.023906	0.1248895	4.06046
ENSG00000144130.11	NT5DC4	-3.63977305993724	0.694303462469275	1.58555033342804e-07	0.000103248534212307	0.0544272	0	0.0325018	0.1400449	0.0300566	0.0535695	1.8981731	1.4244015	0.2182204	0.707391	0.0944345	2.399873	1.808911
ENSG00000244649.4	LINC02086	-4.50109893697161	0.865818874205313	2.00729068132156e-07	0.000122842877649745	0.0406592	0	0.0669733	0.3273302	0.114205	0.0209639	0.4959967	0.2709994	75.133831	0.708682	0.938627	1.151975	58.31087
ENSG00000134363.11	FST	3.69938446870153	0.711825764906665	2.02490636503521e-07	0.000122842877649745	4.624633	36.119346	2.539495	6.409797	146.46275	5.791453	2.717868	2.733875	1.54722	2.182616	1.286704	0.7460278121	0.347232
ENSG00000165215.6	CLDN3	-4.37550396267842	0.842078416931884	2.03538411139202e-07	0.000122842877649745	0.0935833	0	0	0.766638	0	0.554687	42.7505	12.2713	82.4239	2.72454	43.5648	1.10922	4.83038
ENSG00000144655.14	CSRNP1	2.72188644667045	0.525769394793813	2.25532107210873e-07	0.00013287599983174	141.622979	142.94027	193.147609	9.61742	171.166712	27.469162	8.43444	24.7696	22.5770756	26.2627	8.04918	15.9318	6.01044
ENSG00000148339.12	SLC25A25	2.29107241955887	0.44379639202672	2.43751006874331e-07	0.000140270201514077	35.781492	99.774004178	74.370006	10.1484664	82.664887	34.74788711674	10.1949660304113	13.5598990955144	13.0790010074621	16.001645	4.3957	17.140872	6.64015163
ENSG00000144820.7	ADGRG7	-4.14137736612034	0.804139142930974	2.60381505423576e-07	0.000144517542266627	0.0273874	0.0271176	0	0.0641073	0.0263096	0.2049357	8.026934	0.0829493	6.311294	0.4434174	0.1492253	0.822499	6.794201
ENSG00000277075.2	HIST1H2AE	-2.68307093451595	0.52115338546504	2.62812261143594e-07	0.000144517542266627	1.46183	0.944487	1.15604	1.01314	1.0502	1.42682	9.22083	1.7674	3.29637	13.8718	3.98972	26.7697	10.2171
ENSG00000113722.16	CDX1	-4.44574343621644	0.872270386051307	3.45535523129772e-07	0.000183595976254905	0.131902	0	0.0445712	0.240123	0.0823	0.382117	42.7722	0.433443	82.123	1.031599	0.119806	0.125019	85.8257
ENSG00000101115.12	SALL4	-3.74818435706635	0.73565746890988	3.48717352353224e-07	0.000183595976254905	0.3032541	0.0484687	0.0535813	0.195768	0.0942859	0.3810268	0.834642	0.383457	6.84943	3.691127	1.26024436	0.354074	21.584634
ENSG00000197472.14	ZNF695	-2.63296773758797	0.518202447043814	3.75525204861889e-07	0.000193591066548072	0.0980399	0.1664757	0.2443262	0.61494	0.1158599	0.653995	2.177078	0.605325	3.045811	2.255761	2.524421	6.381129	2.930245
ENSG00000276966.2	HIST1H4E	-3.53383976271853	0.696643024672249	3.92273637507335e-07	0.000197891821689406	0.0390481	0.0377471	0.0791591	0.182796	0	0.154187	2.18744	0.0769787	1.27461	2.57856	0.390117	4.65986	1.813
ENSG00000242207.1	HOXB-AS4	-4.31297919775494	0.850850139079399	3.99862238208539e-07	0.000197891821689406	0	0	0	0	0	0	0.540967	0.135636	4.37006	0.597508	0.748707	1.05438	3.28088
ENSG00000181085.14	MAPK15	-2.61140051402025	0.51559481775624	4.08763243857587e-07	0.000198330322926588	1.722365	2.743521	1.537935	1.958105	0.6029588	4.5092522	11.052805	2.172972	33.921811	16.209159	31.352174	16.829973	12.666275
ENSG00000185686.17	PRAME	-4.09486683261423	0.810939303994586	4.4288554997509e-07	0.000210753902579492	0.0191017	0	0	0.021116	0	0.0213487	0.0465082	0.270532	1.94445300706663	0.110287040308	1.0516706249719	0.0255854	0.9477858
ENSG00000075426.11	FOSL2	1.73314951519909	0.344199360435357	4.77083120264584e-07	0.000222743807753719	152.992802	189.50352	169.42055	33.196941	154.88168	78.6466	36.72408	46.766579	59.45667	43.249915	23.53144	49.85746	25.69329
ENSG00000095970.16	TREM2	-2.81793795220742	0.561122635303466	5.11456392720585e-07	0.000234370156256868	1.429	0.691064	1.1473	2.36904	3.784371	1.83733	2.67753	4.9329	11.34191	18.840671	20.658831	18.547028	51.557386
ENSG00000168955.3	TM4SF20	-3.97803729191558	0.795818778874893	5.77264087417699e-07	0.000259716360784563	0	0.0231692	0.0242941	0.0561256	0.0449834	0.018909	33.4494	0.141742	7.33706	0.978797	0.28305	0.0226576	1.1524
ENSG00000261606.5	AC091230.1	4.47540588934196	0.89696681234366	6.05392752062267e-07	0.000267507922317514	21.90174	2.21736	32.8185	0	0.0144389	0.289901	0.0484555	0	0.0294111	0	0.0463448	0.0289074	0.060754
ENSG00000125740.13	FOSB	3.59766096606799	0.723917516982665	6.70527108680145e-07	0.000291091110601582	125.88338	167.088357	278.77726	11.833615	1005.662790237	41.27757	7.4795921405157	33.409719	7.365106	24.3335120040901	0.449652	26.1542290195106	4.13990300037795
ENSG00000118985.15	ELL2	1.81801903725481	0.366789827441298	7.17489455639889e-07	0.00030610821689326	38.148058	105.087784	40.040541	17.2996614	46.402678	57.1251059	9.61299	15.994501	22.1747292	18.4219157	10.686722	10.218906	18.976339
ENSG00000124657.1	OR2B6	-4.06585458348062	0.822669567578347	7.72184356031314e-07	0.000323859354067709	0	0	0	0.105651	0	0	0.48077	0.668041	1.04183	3.29729	0.0615275	7.02016	0.595542
ENSG00000165828.14	PRAP1	-4.11000341676878	0.840001634671895	9.93853013845289e-07	0.000409881547126695	0	0.252158	0.132207	3.076005	0.19353400386275	0.670663	47.3439	6.34093	215.1121	4.02116	2.325265	1.911451	137.5516
ENSG00000175592.8	FOSL1	3.37486783745928	0.69044537509471	1.01887377134848e-06	0.00041331199134456	16.739411	348.98648	30.303372	2.490552	305.366158	77.01975	8.948562	10.201788	6.778	10.948838	2.622197	19.83387	4.501669
ENSG00000273802.2	HIST1H2BG	-3.27719840991756	0.67201548646603	1.07891180713737e-06	0.000430607623671198	0.301379	0.072832	0.30547	0.940571	0.0705674	1.04115	6.36091	0.445583	5.02693	22.356	2.60035	9.917	7.56995
ENSG00000115963.13	RND3	2.24646193378077	0.461219172502992	1.11201487396794e-06	0.000436774731052963	45.709603	162.45588	89.965162	10.523111	92.453851	85.869061	8.8925	16.303152	19.056608	26.912386	7.853987	26.898138	15.784707
ENSG00000164283.12	ESM1	-3.55825218821602	0.732809821660039	1.20005557593507e-06	0.00046399023791427	0.102095	0.3479819	0.077586	0.139488104	1.26872	0.1522167	25.171896	0.414279	3.862823	13.034019	3.199519	8.458364	0.928696
ENSG00000120129.5	DUSP1	2.60251643154331	0.536648785646392	1.23728726499431e-06	0.000471025744188989	977.185	913.215	748.559	38.8458	784.69	305.293	60.2332	108.623	166.894	143.465	26.9965	135.6	28.1246
ENSG00000269929.1	AL158152.1	2.31539432694324	0.477773808166542	1.25839499293272e-06	0.00047180278939576	4.80167	8.85977	3.46481	2.28589	2.85742	3.34262	0.64212	5.89643	0.27512	0.67181	0.26067	0.811227	0.690877
ENSG00000148680.15	HTR7	2.23183900315541	0.461676723145408	1.33680115639122e-06	0.000493718576341804	0.526219	2.183429	1.529388	0.484471	0.4836902	0.540864	0.153979	0.227376	0.187121	0.2005796	0.3872695162	0.1845199	0.07118042
ENSG00000165030.3	NFIL3	2.58984714337504	0.538155918931865	1.49092995191685e-06	0.00053929105044333	108.617	199.056	148.178	9.42348	142.034	11.5249	7.48909	19.8338	20.4628	23.6444	13.655	15.3492	9.9937
ENSG00000168298.6	HIST1H1E	-3.5280148807017	0.733363350219135	1.50378187434188e-06	0.00053929105044333	0.0906848	0	0.092041	0.0707322	0.168852	0	0.572194	0.179042	0.611137	4.73348	0.412091	2.94209	1.15884
ENSG00000171223.5	JUNB	2.32901968208543	0.485418993964065	1.60291812327801e-06	0.000562593521267039	903.453	519.288	795.687	65.5462	1275.31	499.381	72.4039	88.5332	137.406	242.245	56.0073	234.264	88.161
ENSG00000186594.14	MIR22HG	2.07994700248763	0.433634123392393	1.61423075409011e-06	0.000562593521267039	112.144882	245.931948	81.900819	37.743153	141.652431	44.052295	24.95296	53.230283	24.868111	28.58092323	20.945899	21.884248	10.623899
ENSG00000120738.7	EGR1	3.09500523978896	0.647739951522774	1.76906435587824e-06	0.000607993020641765	654.227	317.605	873.509	7.98173	1183.61	378.507	10.2988	51.3256	37.0532	135.549	13.9011	95.804	27.6461
ENSG00000079112.9	CDH17	-3.92051189653937	0.821446589441466	1.81779311805334e-06	0.000616182064468902	0.5181079	0.5566511	1.234283	0.5042193	0.12747309	0.600842	100.234141	0.1360458	43.071147	1.12442	0.444167	1.08612	34.325221
ENSG00000100739.10	BDKRB1	3.12667159795438	0.656003239176983	1.87691806767319e-06	0.000619257834460975	22.05885	61.234258	22.163011	0.974609	120.437771	8.189341	1.530345	3.321877	4.52885	8.09022	3.86078	1.000599	2.300191
ENSG00000036672.15	USP2	3.01081276511688	0.631501813770927	1.86338683304677e-06	0.000619257834460975	13.882973	44.139363	6.071863	1.042643	5.795512	3.273592	0.8915146	2.426924	0.4765919	0.6379422	1.9042255	0.41031390785111	1.533138
ENSG00000231752.6	EMBP1	-2.57242382519155	0.540776810828707	1.9658378580063e-06	0.000640061286794288	0.1018629	0.0437488	0.1558705	0.2252383	0.138465	0.1387373	1.385651	0.2640464	0.3244312	1.625894	0.423245	1.691256	1.244491
ENSG00000237424.1	FOXD2-AS1	-2.79035723687746	0.586965807918159	1.99562592203179e-06	0.000641321603125672	0.413543	0.25237	0.132311	0.968027	0.469708	0.446193	2.06092	0.750509	4.13344	5.50088	0.810327	6.2299	11.6128
ENSG00000070019.4	GUCY2C	-3.79939762285374	0.801149320455064	2.11165834982817e-06	0.000669910075211515	0.0413752	0.0266469	0.0838219	0.301325	0.1386403	0.206459	11.340914	0.393945	18.1912221	0.3984032	0.2131912	0.0650637	6.513247
ENSG00000143502.14	SUSD4	3.05032779083815	0.643550232015039	2.13882686459534e-06	0.000669940136258374	4.2666378131031	14.914131	5.81654	4.113938	1.006168	47.7166130307838	1.82828180134052	2.0567550878582	0.523578	1.326772	1.640838	0.8880945	0.414867
ENSG00000181577.15	C6orf223	-3.36200777418104	0.712230149598945	2.35386869684335e-06	0.000728081011292358	0.178374667746	0.157963	0.139384	0.197177	0.0279161	0.1378997	0.508947	0.1615361	8.27458	1.941021	0.589758	9.432151	0.1417233
ENSG00000124635.8	HIST1H2BJ	-2.90796693517739	0.616819471943349	2.42359922997042e-06	0.00074039460426689	1.624696	1.255969	2.704806	1.305446	0.502647	0.964074	2.345861	2.915869	5.63468	36.96032	2.825479	42.76101	16.77845
ENSG00000267706.3	AC020922.1	-3.33608408431639	0.709285917612696	2.55813717439335e-06	0.000762663908197149	0	0.0229404	0	0.0151688	0	0.0436844	0.177007	0.0738883	0.0849629	0.61106	0.0935083	0.566289	0.49553
ENSG00000169495.4	HTRA4	-3.08663461970719	0.656036574153189	2.53899077400429e-06	0.000762663908197149	0.0795609	0.102513	0.10749	0.206926	0.149221	0.146437	0.292961	0.20905	0.610638	2.58001	0.38533	2.90816	5.99011
ENSG00000141314.12	RHBDL3	2.32546288462894	0.500350184967676	3.35704293604721e-06	0.000966270911055679	1.023976	2.308177	1.61052	0.3444615	1.912678	0.445034	0.213614	0.556423	0.259499	0.163513	0.3406703	0.0999152	0.0754652
ENSG00000270210.1	AC104695.2	2.13874700363252	0.459842024785245	3.30253578517625e-06	0.000966270911055679	6.46574	4.56593	7.44866	0.817831	9.19534	2.07913	1.03372	1.12118	1.34566	1.21609	1.74695	0.833337	0.488564
ENSG00000135747.11	ZNF670-ZNF695	-2.43634122127593	0.52421513831072	3.3582258375748e-06	0.000966270911055679	0.0671026	0.0590752	0.0399178	0.0461161	0.0369783	0.0350066	0.2244	0.0590702	0.311339	0.403231	0.18571	0.484292	0.6693847
ENSG00000162639.15	HENMT1	-1.42747119858397	0.307628302295084	3.47993577537472e-06	0.000989781732892499	3.958023	2.643948	2.681464	5.147761	3.593285	4.321252	10.966815	5.152929	11.54128	12.427804	8.446689	17.680883	13.25085
ENSG00000107593.16	PKD2L1	-2.7729438512156	0.599525244036274	3.74177808786592e-06	0.001040340435778	0.223504	0	0	0	0.2313465	0.1799863	0.5865472	0.66449	0.9132857	1.38552427	0.6549006	1.2157409	2.33103563
ENSG00000133874.1	RNF122	2.36543291160168	0.511160670016629	3.69977250298829e-06	0.001040340435778	55.468	57.1309	57.6756	7.35808	46.4314	3.20953	4.06519	7.57105	7.05441	12.0134	6.45736	4.04665	6.1286
ENSG00000175832.12	ETV4	-3.41523973911517	0.740418235697951	3.97697795733152e-06	0.00108143208301284	1.23170300431948	0.448982	0.512697	5.3471132	0.5151574	5.5604282309111	20.202472	4.3154609	281.514995	21.7421523	8.23906	48.865143	13.6961989
ENSG00000186350.10	RXRA	1.13216773550986	0.245397473490235	3.95738568325306e-06	0.00108143208301284	39.179609	30.3627059	34.046401	17.235727	35.8575312	33.965249	12.606564	26.323586	18.737771	13.065782	17.71828	11.4878334	9.649871
ENSG00000174827.13	PDZK1	-2.82296285375321	0.612946959414062	4.11361045751881e-06	0.00110642707360112	0.33026681	0.39599	0.329528	0.45305	0.184016	0.2661362	2.00209400031887	0.429508	0.937028000240226	1.3093286	1.220137	5.293	11.490253
ENSG00000261888.1	AC144831.1	2.18530414409742	0.474752694796423	4.16374541515195e-06	0.00110786968062296	3.15126	5.91165	1.7207	0.97396	12.1361	2.67795	0.823472	1.29017	1.099	1.27954	0.724654	0.966317	0.672155
ENSG00000119508.17	NR4A3	3.43585954267899	0.746933302655916	4.22582319569511e-06	0.00111242547848378	124.56289	86.486933	5.452232	0.792234309123	67.03717	1.178134	0.5863523	1.966623	3.1695270115661	8.838848	1.125954	1.1774582	1.283172
ENSG00000147889.17	CDKN2A	-3.16572375135347	0.690444974935273	4.53880894224674e-06	0.00118224028711469	0.7071993	1.2847929	0.320109	5.841226379	1.5342754	4.7552207	26.05415	3.8732355	3.80213	21.1951485	60.559429701379	50.403413	97.240883
ENSG00000258053.1	AC025575.2	-3.61732583229558	0.790274580667983	4.71010069179237e-06	0.00120803078689775	0	0	0.139812	0.107288	0	0.109631	0.600586	0.136009	3.45257	3.59489	1.37639	0.132165	3.72843
ENSG00000050344.8	NFE2L3	-2.07020822368978	0.452387978143088	4.7354611569643e-06	0.00120803078689775	4.8521	3.03014	2.994446	10.73797	4.582503	6.79738	14.67156	6.98011	37.08925	39.49345	17.57938	59.58778	31.2756
ENSG00000225880.5	LINC00115	-1.41816800361152	0.310312745123044	4.87433622574673e-06	0.00123076989700105	1.22693	1.23632	0.729757	1.42779	0.574966	0.988149	2.61992	1.41551	3.64818	3.57367	2.8645	3.65059	3.81414
ENSG00000229839.6	AC018462.1	3.64379045368417	0.800384912923104	5.30001517168445e-06	0.00132473611538719	6.038578	0.0981963	0.104875	0.317069	0.269183	26.94001	0.10688	0.333751	0.219822	0.257352	0.1991828	0.230213	0.173133
ENSG00000160180.15	TFF3	-3.3555102767959	0.739417081680467	5.67773138035365e-06	0.00140495463006851	11.62806	5.32316	9.52097	12.44597	38.2666	26.09342	1349.90553	12.73838	265.43443	33.1597	46.22468	401.79616	76.88292
ENSG00000134443.9	GRP	3.8073943831989	0.840004921177489	5.82659951518841e-06	0.00142751688122116	24.297416	13.48207	30.085803	0.181444	0.444844	0.0638251	0	0.483096	0.6159868	0.211433	0.444233	0.236663	0
ENSG00000160307.9	S100B	3.14636991175254	0.695463687597138	6.06437091165101e-06	0.00147120449224318	30.294593	28.713946	70.38322	7.271164	232.329071	12.801766	0.351255	19.761234	2.844021	3.09792	6.753995	1.984307	2.7924834
ENSG00000250133.2	HOXC-AS2	-3.59946082372903	0.797074847645138	6.30668883960498e-06	0.00151513607122355	0	0	0	0	0.152437	0.020975	0.390658	0.163308	0.102043	0.300258	0.0965875	2.021091	0.71069
ENSG00000263050.1	AC090617.5	2.67929597839541	0.594084921593803	6.48415250350808e-06	0.00154279186249334	14.8145	11.7735	3.97962	0.481396	15.34	1.64943	0.324625	2.03786	0.597968	1.07695	1.31162	0.796918	1.14591
ENSG00000228168.1	HNRNPA1P21	-3.32819277905014	0.739201419813184	6.71851070866019e-06	0.00158332902367425	0.198085	0	0	0.051508	0.0616436	0.470441	0.468777	0.521069	2.79328	9.64464	1.25981	1.0673	3.27318
ENSG00000159200.17	RCAN1	3.16552182859686	0.704102165796314	6.92999264805301e-06	0.00161776101958558	196.29227	1565.008064	107.601915	15.8027483	217.886049	13.538637	14.948009	38.789656	34.032226	57.803612	20.9819819	22.287061	9.8733347
ENSG00000147099.20	HDAC8	-0.537936037864238	0.119936075874847	7.28491332872288e-06	0.00168472131139484	19.8972697	13.9271976621	17.547156887	12.085042789448	15.0751497	13.640020623	20.1711296492709	21.2917962	25.706280436754	24.1303503	22.2087917859578	31.3126494699	24.6483528803201
ENSG00000109107.13	ALDOC	1.95671027120533	0.437797589822471	7.84244771350309e-06	0.00178796911227382	16.694693	19.246812	16.103872	19.108407	75.434216	22.375867	10.267973	7.902978	11.931054	4.8346917	6.7487539	4.307768	5.305513
ENSG00000181104.6	F2R	-1.42727939814211	0.319406884621248	7.87587929835712e-06	0.00178796911227382	10.051086	4.708003	7.844388	9.02742	4.48382	3.18433	9.109885	11.7773	21.79376	31.114977	19.690063	21.833037	23.548134
ENSG00000221869.4	CEBPD	1.99878441978011	0.447998755162312	8.13557541072048e-06	0.0018301346685298	256.463	272.825	291.348	28.3688	179.27	58.3556	27.2851	58.0286	49.5283	76.6221	44.2757	24.9269	29.7942
ENSG00000120659.14	TNFSF11	-3.30993811380346	0.742888003947685	8.3697574355859e-06	0.00185763215569181	0.0813078	0.0250982	0	0.12687468	0.075768	0.41640200195465	0.43642	0.127953	2.8459	6.07058	0.518873	3.8757762	4.651805063
ENSG00000229689.3	AC009237.3	-1.62973304814966	0.365860203134223	8.40795317993462e-06	0.00185763215569181	0.7018607	0.4257484	0.637233	1.069581	0.2400998	0.5957704	3.179666	1.296392	2.261923	1.720834	2.050854	2.537348	1.796061
ENSG00000185022.11	MAFF	2.63007158999338	0.591186022249412	8.63491902891697e-06	0.00189089443690753	97.132004	353.737094	43.154981	10.7692339	211.949776	33.890075	15.0196373	13.1359819	19.313075	29.170915	9.6584346	34.306511	6.2494049
ENSG00000149654.9	CDH22	3.58051381559758	0.805219737675621	8.72281031102996e-06	0.00189338544865295	0.148775	0.0280564	0.102965	0.0906447	0.4525546	0.743703	0.034375	0	0	0.0303205	0	0	0
ENSG00000251151.2	HOXC-AS3	-3.96084525369308	0.892180160726515	9.01627476391758e-06	0.00194006712202731	0	0	0	0	0	0	2.90768	0.0189253	0.2832851	1.803181	2.991226	0.145092	0.3517263
ENSG00000233922.2	LINC01694	-3.21543590285112	0.726072826803432	9.48771555693133e-06	0.00202390966772643	0.1946884	0.0223325	0.0312224	0.0300695	0.0218461	0.0182065	1.601553	0.2027065	2.921935	0.287721	0.2205786	0.0508556	0.105027
ENSG00000196890.4	HIST3H2BB	-2.98362944278403	0.675152346964714	9.90695221911719e-06	0.00209527805694064	0.0464475	0	0.0470605	0.0543622	0.0435737	0.219763	0.513098	0.251689	0.311871	2.66253	0.147621	1.55796	0.948795
ENSG00000198788.8	MUC2	-3.39129431048281	0.769190769479872	1.03891290502099e-05	0.00217863557921562	0.00403127	0.00778682	0.00408245	0.0251656	0	0.0222132	86.2721234	0.00793901	0.0772543	0.783907	0.018299	0.4980515	0.4081838
ENSG00000254290.1	AC124067.4	-3.45476543992434	0.784380138879791	1.06051139316039e-05	0.00220523986754234	0.138383	0	0.0233682	0	0.0216373	0.0181873	0.272982	0.4993752	0.862797	0.0400635	0.209435	0.24622	3.12242
ENSG00000257815.5	LINC01481	-1.24610596556979	0.283673547152753	1.11927639325073e-05	0.00230804119591578	4.71415	3.513351	2.73057	5.14043	2.14896	4.1453	7.447804	9.67368	10.28236	13.73963	7.10042	7.86342	13.34737
ENSG00000140600.16	SH3GL3	3.0520959127095	0.696686672918482	1.1820469533495e-05	0.00241733486451516	0.187754	0.211706	0.3656179	0.3729249	0.0650786	1.068068	0	0.0510859	0.0866974	0.0301737	0.085255	0	0.0278077
ENSG00000272183.1	AC005041.3	-2.66474809211126	0.609397223803049	1.22685306596004e-05	0.00244826444493397	0.447498	0	0.113608	0.52349	0.103904	0.444677	1.67627	0.331519	2.91132	2.92122	1.11874	4.28302	4.90969
ENSG00000088305.18	DNMT3B	-1.67441299125294	0.382845253576025	1.22212773911023e-05	0.00244826444493397	1.090022	0.2066487	0.721447786	0.82548337	0.668302635	0.83980330755769	1.374608	1.50507	3.5476278795	2.13672860699	1.60222205	4.0208400669331	4.51596786
ENSG00000092068.19	SLC7A8	1.39169700296489	0.318205797278949	1.22228079509453e-05	0.00244826444493397	16.583328	28.7867542419	27.362387	49.086140290425	15.66554	32.204609909	13.466751	12.029973	11.370913416896	11.544837181	9.726933	10.369466	12.40716642724
ENSG00000170369.3	CST2	-3.2151602415402	0.736539913939854	1.26993713452512e-05	0.00249401542808128	1.10012	0.0887262	0.279152	0.64355	0	0.0727454	2.09689	1.44805	2.73623	7.49839	24.9963	1.83731	1.17147
ENSG00000179528.15	LBX2	-2.25317245567366	0.516156227061895	1.26953272262984e-05	0.00249401542808128	0.489356	0.6242958	0.371529	1.104135	1.220159	0.290106	2.786232	0.79525	4.132162	3.8457547	2.538013	10.782888	5.08419
ENSG00000138755.5	CXCL9	-3.21634226719526	0.737721188173721	1.30160864413488e-05	0.00251627389836857	9.41815	0.764689	1.76399	6.71579	2.80393	9.99816	3.43477	3.23565	44.7819	122.517	13.0615	168.149	299.879
ENSG00000108691.9	CCL2	3.16287001836766	0.725408728135968	1.29990389080795e-05	0.00251627389836857	435.3421	3713.888	1161.4795	12.860117	1902.0528	36.079239	23.130984	71.10245	191.4826	196.24404	58.441499	48.969258	68.41154
ENSG00000272468.1	AL021807.1	-3.1291743350882	0.718837260668455	1.34222600745144e-05	0.00257103511444934	0.550356	0	0.139812	0.751019	0.127416	0.657787	1.95281	1.22408	1.19512	20.6107	1.25126	16.2562	2.85116
ENSG00000063046.17	EIF4B	0.784226405224189	0.18021053289779	1.35071555820737e-05	0.00257103511444934	196.182773	186.006684	196.92897	107.7193543	132.1416769	134.539737	67.7736441	159.177127	95.9162667	97.4639809	100.7605487	110.3160328	74.1173454
ENSG00000006047.12	YBX2	-2.33021831054775	0.536502656781963	1.40326901769078e-05	0.00265067876662277	1.345746	1.67833784374	2.262567	1.334567	6.545534	2.043002	24.3194	2.8223819	22.210671	6.393758	21.01817	31.244858	7.335592
ENSG00000179270.6	PCARE	3.11586229429674	0.71898997220049	1.46646704301539e-05	0.00274907022571332	0.234986	0.1276998	0.1339385	0.0229204	0.2443109	0.0578223	0	0	0	0.019126	0.0333345	0	0.00588656
ENSG00000183734.4	ASCL2	-3.53856452092319	0.817904356621084	1.51580281729926e-05	0.00282019103113309	0.699685	0.0294009	0.0616565	3.56038	0.456249	1.60835	5.66477	1.07922	146.573	2.93336	19.5321	5.15069	94.3286
ENSG00000065559.14	MAP2K4	0.872131265142743	0.201909086396642	1.56435876159561e-05	0.00288881026534951	11.7088210045027	16.533998	13.187644	8.705677369744	9.969699	14.880119	6.642223	10.242331	8.52187000110873	6.7843009	7.6040580363418	7.795672	4.88214410053842
ENSG00000154975.13	CA10	3.10467270977712	0.720116559916837	1.62262686551555e-05	0.0029742149471987	0.81467	0.0935703302	0.3568338	0.1322212	0.0454156	0.152733	0	0.0715541	0.023222	0	0.0219829	0.0228767	0
ENSG00000279419.1	AC004925.1	3.03084573822662	0.70384203826965	1.66124330667408e-05	0.00302260776644486	0.260708	0.11626	0.101587	0.031296	0.0564612	0.0790488	0	0.0197565	0.0192331	0	0.0364201	0	0
ENSG00000225210.10	DUXAP9	-2.66744867715778	0.62056774531406	1.72035135869693e-05	0.00306318674595253	0.6418042	0.334502	0.473561323	0.977326	2.021467	0.731766	5.991430424398	0.8154075	31.282199	5.304093	5.332629	1.461952	8.509836
ENSG00000167470.12	MIDN	1.46489515445847	0.34080345118496	1.72068279526127e-05	0.00306318674595253	100.550041	190.40596	124.09116	32.62874	117.21687	116.68121	32.603006	41.825511	46.77691	60.82689	24.968422	70.943899	31.70839
ENSG00000236790.5	LINC00299	-2.36143291136862	0.549151530087845	1.70684000788332e-05	0.00306318674595253	0.0938492	0.076479	0.0326477	0.1527846	0.1105494	0.025425	0.3961548	0.1010957	0.4895417	0.811062	0.3928595	0.629551	0.975276
ENSG00000135046.13	ANXA1	3.07607452285602	0.716505212827627	1.76144645494538e-05	0.00311335660911596	107.306809	409.474755	107.628223	84.8234722	1972.76949	5618.9632	31.730246	236.999633	102.502991	138.903895	87.5349187	193.382486	81.863094
ENSG00000121039.9	RDH10	2.38603309889147	0.556399564274609	1.80009625010103e-05	0.00315910508572695	139.055569	266.44176	76.181277	11.837171	46.68633	12.476493	15.029345	14.541421	13.737464	28.732618	10.785908	16.916959	9.88982
ENSG00000140506.16	LMAN1L	3.69730734795707	0.86273631031944	1.82280273191099e-05	0.00317642630993926	20.438249	2.149899	31.543654	0.1050027	0.0181764	0.373635	0.325468	0.1741661	0.1514063	0	0.23819	0	0.2980638
ENSG00000163661.3	PTX3	3.50611784036471	0.818918706181565	1.85721900886937e-05	0.003213768138075	7.85607	49.2943	23.0632	0.698605	144.706	0.319031	0.296264	6.37523	1.30253	0.602142	2.38685	0.191193	0.0693937
ENSG00000099860.8	GADD45B	2.72988090389979	0.638433994678496	1.90365345084385e-05	0.00327124337785632	424.97529	356.27144	1192.88	17.258225	212.158746	21.971545	13.2214	60.013931	69.344613	54.386513	63.674419	30.602415	19.76156
ENSG00000166415.14	WDR72	-3.64526183688436	0.853489415044414	1.94589671031766e-05	0.00332077338598694	0.0249787	0	0.0253013	0.00974543	0.0234617	0.405231383	3.93267706	0.15991438	9.3893767	13.2438335	0.0566982	0.129598	3.34193748
ENSG00000260597.1	AC012531.1	-3.26595431536905	0.765618914357118	1.99213790155411e-05	0.0033610560712253	0.0607941	0	0	0	0.0190172	0.0319516	0.271835	0.0399275	0.505309	0.105596	0.036802	1.14833	0.308475
ENSG00000167550.10	RHEBL1	-1.79029361388267	0.419887166022308	2.01024974152897e-05	0.0033610560712253	0.746347	0.494117	0.655818	0.728668	0.465378	0.589995	0.588842	1.569917	2.07094	2.876591	1.4463000273693	5.2393459587	4.097559
ENSG00000162722.8	TRIM58	2.30951322156019	0.541649414197832	2.00932089236084e-05	0.0033610560712253	0.487823	0.240764	0.387094	0.233344	0.311951	0.196398	0.0262193	0.180018	0.0637213	0	0.075426	0.0627284	0
ENSG00000172987.12	HPSE2	3.44308047623136	0.808114302881364	2.03846463376155e-05	0.00338535619882077	11.088001	12.008548	2.0816597	0.045062	0.189808	0.9760238	0.05083709	0.4594783	0.0138419	0.64829	0.0655439	0.0921044	0.0115699
ENSG00000179546.4	HTR1D	-3.50783661476574	0.825012575187314	2.12003934021658e-05	0.00347419691878538	0	0.0184277	0	0.0744102	0	0.120275	1.05348	0.338198	1.90222	0.380962	0.0346368	0.162088	4.59967
ENSG00000144218.18	AFF3	2.11312045546467	0.496963392576895	2.1180872622885e-05	0.00347419691878538	5.2722693	4.3202017	4.610027	2.418102	0.9411493	1.4232159	0.6633221	1.2040914	0.3126309	0.5882509	1.439106	0.1731309801	0.29886955
ENSG00000197927.12	C2orf27A	-1.68884702354682	0.39751590587685	2.15204961745236e-05	0.00350345182788544	2.62557	0.7929217	2.473332	1.1207753	1.3293188	0.7598916	2.844502	3.354442	14.856598	5.298547	5.42486	4.234041	3.68087
ENSG00000184357.4	HIST1H1B	-3.52258682271788	0.830740084422506	2.23221676825079e-05	0.00361020940721344	0	0	0	0	0	0.0829671	0.49418	0.103138	0.201237	1.27238	0.569602	2.09688	0.25008
ENSG00000166106.3	ADAMTS15	3.23228212304844	0.763893864553468	2.32320172352475e-05	0.00373296276939091	4.02206	15.6022	2.00893	4.66469	83.7986	0.903988	1.442	3.78017	0.589691	0.741463	1.51736	0.0779232	0.220816
ENSG00000162344.3	FGF19	-3.77141214075946	0.892474954249247	2.38103486241512e-05	0.00380120694648143	0	0	0	0	0.0209841	0	0.0352963	0.0440703	3.06773	0.135977	0.995167	0	0.215008
ENSG00000229637.3	PRAC2	-3.77807585607634	0.894846872483241	2.42105253647631e-05	0.00384031698814783	0	0	0	0	0	0	3.12386	0.163308	0.957329	0	4.38499	2.114331	0.52573
ENSG00000105173.13	CCNE1	-2.72955550345914	0.648024944133993	2.52990824556213e-05	0.00396218857825537	2.265857	1.094162	2.803242	4.352942	2.298879	5.518857	11.380977	1.641219	14.041995	7.950109	117.088578	21.977423	38.255484
ENSG00000214076.3	CPSF1P1	-3.22398091238294	0.76522040863198	2.51844560117357e-05	0.00396218857825537	0.0142371	0.0137539	0.0288433	0.0412233	0.0133698	0	0.16219	0.224371	0.801751	1.40471	0.0387804	0.0403016	0.0228187
ENSG00000077943.7	ITGA8	2.75568156310008	0.655862046308022	2.65014435716709e-05	0.00409861388238122	112.2823	29.28354	20.25143	9.82193	3.51623	5.199893	2.355868	5.404712	1.420809	10.20392	1.233972	0.858196	1.144093
ENSG00000117407.16	ARTN	1.73148988592666	0.41202384373137	2.64097420689871e-05	0.00409861388238122	7.538166	4.069627	5.567314	1.158248431938	1.7726394	5.69620985	0.692795841	1.6120838	1.448604862376	1.437437	2.19078746	1.3554160169234	0.49005941501
ENSG00000162849.15	KIF26B	-2.19934407241609	0.524323216554895	2.73312353705843e-05	0.00420069204500067	0.5234484	0.3252306	0.486962	0.3912752	0.15865	0.14667	0.408833	0.724275	6.179905	0.9608009	1.31612	4.067052	0.881745
ENSG00000101306.10	MYLK2	-2.08886125529515	0.498230971273522	2.75828945606589e-05	0.00421320201175003	0.0388532	0.0375395	0.2150646	0.1103746	0.0662645	0.0837601	0.502279	0.2091375	0.618746	0.24581	0.706629	0.334771	0.622944
ENSG00000175505.10	CLCF1	2.04329156925466	0.488385113413282	2.86712689399408e-05	0.00435258006085176	25.2195	60.9695	58.959897	6.959136	25.751398	5.57225	4.578207	13.487415	5.1335	6.45296	9.27226	6.997346	4.4309
ENSG00000146648.17	EGFR	1.53338792192189	0.366704005819995	2.89539724865184e-05	0.00436869542182254	15.611636	26.3975007	15.267636	4.451878	16.6026098	18.7174157	3.4099537	10.1866976	5.9519835	4.0473315	7.1152185	8.4259572	2.9303992
ENSG00000137745.11	MMP13	-3.69085019178101	0.883321364168879	2.93595943731866e-05	0.00440304947130001	0	0	0	0	0	0.0417409	0.126092	0.0196779	3.17999	0.688242	0.671094	0.301826	0
ENSG00000280106.1	AC008555.8	-1.16119307111884	0.278091725078298	2.97233286692662e-05	0.0044307455898855	0.944855	0.34548	0.672754	0.697381	0.574807	0.866095	1.63212	1.48451	1.83736	1.44175	1.1131	1.8344	2.41363
ENSG00000138135.6	CH25H	2.42849092624892	0.58372361020762	3.17768828544325e-05	0.00465277494812385	7.47405	38.6372	10.8651	1.6096	17.9675	6.99409	1.44094	1.33321	2.56426	4.90666	2.97926	0.352059	2.5725
ENSG00000100557.9	CCDC198	-3.6204470662054	0.869806946752377	3.1497934312543e-05	0.00465277494812385	0.126196	0.127009	0	0.2564894	0	0.0958201	5.4473913	0.1669858	0.4220861	4.2987911	0.1350758	36.226923	0.0484226
ENSG00000110680.12	CALCA	3.06717284193656	0.737036709701677	3.1617419159586e-05	0.00465277494812385	1.23860723	2.441249	0.861371	0.121902	1.7455139628	0.0619424	0.1225124	0.0761591	0.127186	0.1819099	0.119869	0	0
ENSG00000237686.6	AL109615.3	-2.55167470317973	0.613688902023862	3.21146207850933e-05	0.00467456641957138	0.0494647	0.0477988	0	0.1100369	0	0.0585178	0.214667	0.170577	0.237256	0.983059	0.157213	0.67887151	0.316976
ENSG00000155511.17	GRIA1	3.33813361041033	0.804045036874622	3.30050865679461e-05	0.00477608694224459	8.80989700220096	1.2492439	1.388631	0.2029508	0.2345455	0.0393235	0.00787967	0.164175	0.1877063	0.15898220524	0.108793	0	0.00800374
ENSG00000128610.11	FEZF1	-3.76279310515175	0.907036473692349	3.34737728389584e-05	0.0048157471447676	0	0.0255743	0.0268159	0	0	0	7.422346	0.101656	6.808489	0	3.74188	0	0.7607338
ENSG00000037965.5	HOXC8	-2.92095765392606	0.704633055228058	3.39280303225374e-05	0.00483993310313813	0.0297547	0.0287564	0	0	0.362609	0.211301	1.00953	0.469135	0.713787	1.70593	0.918727	3.32071	2.02544
ENSG00000134121.9	CHL1	1.98601875205172	0.479176281830425	3.40330717294821e-05	0.00483993310313813	5.588946	4.0232828	8.867669	1.880737	9.223312	5.16037	1.9448698	2.8073798	1.6449724	1.06273	1.5843483	0.316691	0.4496915
ENSG00000113763.11	UNC5A	-2.37758670638405	0.574634572826061	3.51014196620964e-05	0.00496334074022043	0.125225	0.0268831	0.0986589	0.0434278	0.0914676	0.032888	0.131752	0.224943	0.346826	0.277883	0.88433	1.45724	0.100355
ENSG00000277619.1	AC008406.3	3.19631288523658	0.774420380904221	3.66949260642561e-05	0.00515918150829555	1.20004	1.66739	0.413429	0.0775236	0	7.55035	0.101321	0.0421984	0.205526	0.074395	0.16929	0.162262	0.068523
ENSG00000273983.1	HIST1H3G	-3.13106483046396	0.759599813091056	3.75609222318573e-05	0.00517296969087192	0.0227301	0	0.0460595	0.177356	0.0426498	0.125465	0.286967	0.156759	0.283431	1.79649	0.165122	6.35664	0.691933
ENSG00000002822.15	MAD1L1	-0.985060235470308	0.23884487020864	3.719157841733e-05	0.00517296969087192	10.935979	7.010224	9.31633	12.894431	7.972718450064	10.566234	15.80474	15.798741	24.557493	24.824162	33.273973	20.058409	16.921575
ENSG00000155090.14	KLF10	1.89297059927188	0.459283380941914	3.76291996103029e-05	0.00517296969087192	103.45405	106.21191	157.54693	9.887656	130.02798	32.06688	10.233777	35.220827	34.96778	23.184559	25.78025	20.280699	19.455133
ENSG00000169994.18	MYO7B	-3.12101374512398	0.756983151303646	3.74029323084895e-05	0.00517296969087192	1.054798188	0.528443261	2.001588857	1.32691443	0.597032863	1.05879825764	50.1678945	2.1912434	55.074274	1.40874231	1.79442669	0.20412499	12.247783
ENSG00000278505.4	C17orf78	-3.61215904220936	0.880100488558204	4.05615461338298e-05	0.00554527877945646	0	0	0	0.0265836	0	0.0268947	1.742009	0.0671579	2.9543	0.059201	0.0618864	0.0322453	0.0545612
ENSG00000275437.1	AL121832.3	-2.31243677556336	0.563914315419536	4.11923283599879e-05	0.00555757208809037	0.157951	0.263564	0.174544	0.347335	0.053937	0.328104	1.16706	0.155578	2.29903	1.42142	0.299865	2.8318	2.40498
ENSG00000156510.12	HKDC1	-3.19077881381624	0.777774573210372	4.08803860236671e-05	0.00555757208809037	0.172853	0.0139156	0.3067935	0.846079	0	2.573409	14.778157	2.341971	31.00829	14.504	2.706095	20.383938	12.233764
ENSG00000196611.4	MMP1	-2.82622949388016	0.689333904132522	4.13252480989544e-05	0.00555757208809037	1.2493	2.90859	0.316488	13.8239	3.62042	3.60651	20.0958	11.9746	123.683	102.182	18.7969	117.032	4.59342
ENSG00000170837.2	GPR27	2.19731235005161	0.536395530455504	4.19551341528665e-05	0.00561178267358206	5.21127	2.95916	2.08478	0.959831	1.13314	2.87463	0.176481	0.749195	0.386148	0.543906	1.44198	0.10565	0.143339
ENSG00000265933.5	LINC00668	-3.74003902715767	0.913833112899001	4.26390791279109e-05	0.00567260222053847	0	0	0.023761	0	0.0219998	0	24.522431	0	15.050575	3.023094	0.3775228	0	1.9314559
ENSG00000265287.2	AC005726.5	-1.57972571230595	0.386550212199707	4.37498861399575e-05	0.00578925632370722	0.493596	0.522839	0.574417	0.18931	0.926298	0.876023	2.64977	1.33783	1.83874	2.93739	1.37236	1.88718	2.031
ENSG00000166546.13	BEAN1	1.02131026557406	0.250204737762158	4.46693657520479e-05	0.00587948646560865	1.326782	0.5918943	1.052004	0.5840476	0.9450248	0.8610318	0.339363	0.665494	0.601951	0.503975	0.2909067	0.6430779	0.3484752
ENSG00000229320.3	KRT8P12	-1.13954605790463	0.279287736079312	4.49995767077739e-05	0.00589161124674002	3.750091	1.747373	1.398339	1.6213	2.843019	1.630202	4.82714	4.20886	4.06547	5.81778	4.06284	8.9242	4.71781
ENSG00000170419.10	VSTM2A	3.07344392019547	0.754687806782678	4.65170693886051e-05	0.00605823622116333	0.3571713340782	0.1575275	0.937967	1.737939	0.0704614	0.3024612	0.1180356	0.051002	0.15697	0	0	0.0409082	0
ENSG00000214273.4	AGGF1P1	-2.7940387690536	0.686831224241602	4.7415612224785e-05	0.00609856983094186	0.0268318	0.0259296	0	0.0251935	0	0	0.168916	0.0793151	0.215714	0.0782959	0.0815335	0.142247	0.3023
ENSG00000224167.1	AL390729.1	-2.85861379220717	0.703040977579757	4.78125903092633e-05	0.00609856983094186	0.490451	0	0.175926	0.1724444	0	0	0.457519	0.401929	0.636416	0.844516	2.772898	3.217805	2.585302
ENSG00000269959.1	SPACA6P-AS	2.81264885937606	0.691568301761382	4.76102590558412e-05	0.00609856983094186	0.227105	0.4775	0.040596	0.0208482	0.840622	0.0526252	0.0105416	0.0394742	0.0256144	0.0347999	0.048518	0.0378113	0.0107062
ENSG00000282988.2	AL031777.3	-2.42614041409898	0.596384209030316	4.74015145150757e-05	0.00609856983094186	0.2754981	0.2599388	0.2488555	0.2925581	0.121868	0.890628	2.124686	0.3808569	0.990927	4.87287	0.724885	7.31468	2.341952
ENSG00000124942.13	AHNAK	1.51602873073174	0.37333366854943	4.89074506803698e-05	0.00611188505134761	179.403066	198.20998	227.048438	84.85553	168.327047	160.11933	40.315649	156.27053	36.582516	41.368056	72.46147	68.834583	24.847969
ENSG00000133958.13	UNC79	2.14966086522148	0.530129416306675	5.01399339431629e-05	0.00611188505134761	0.1818848	0.0651168	0.238876	0.166678	0.06828253	0.0530807	0.03189072	0.0348176	0.0572919	0.01554416	0.01069102	0	0.0343938
ENSG00000130037.4	KCNA5	3.06801127074699	0.756434413689979	4.99447512906331e-05	0.00611188505134761	6.03656	7.86922	20.9563	0.135741	0.834508	0.304743	0.0610094	0.837841	0.352203	0.637893	0.997603	0.0912644	0.0619473
ENSG00000130513.6	GDF15	-2.3205121801701	0.571930985834903	4.96371335650454e-05	0.00611188505134761	15.1264	2.345673	5.414885	4.969875	2.732955	10.0351575	15.2474157	8.57235	20.2582899	67.092744	137.799908	28.2048798	24.107262
ENSG00000225187.1	AC073283.1	-2.89056218477658	0.71269642116771	4.99605868951284e-05	0.00611188505134761	0.228382	0.147305	0.231711	0	0	0.120643	0.971471	0.0751186	2.6309	1.25789	0.138351	2.74	1.47827
ENSG00000183569.17	SERHL2	1.34508534158792	0.331067228273781	4.84716275889744e-05	0.00611188505134761	6.3930041	2.794762	4.9240072	3.531058	3.5921222	4.1889743	1.422999	2.9208002877	1.8167794	0.7835492	2.916232	1.7131496	0.775907
ENSG00000233670.6	PIRT	3.32488994585423	0.819204221848081	4.9350329886332e-05	0.00611188505134761	2.93746	0.780041	3.06012	0.445382	0.013074	0.0658125	0.0329563	0.233109	0.0400406	0.0120885	0.0505611	0	0
ENSG00000117598.11	PLPPR5	3.656185246369	0.900348163560624	4.88928886272494e-05	0.00611188505134761	0.390902	0.2919933	0.4406394	0.00995571	0.0152799	0	0	0.0125666	0	0	0	0	0
ENSG00000168481.8	LGI3	3.34013401328464	0.822826224780039	4.92109470636808e-05	0.00611188505134761	0.7761	0.949766	1.12694	0.0403719	0.0809526	1.88572949	0.0816539	0.128919	0	0	0.0313199	0	0
ENSG00000179388.8	EGR3	2.58357498690754	0.638129396545578	5.15096359256339e-05	0.00622512616583659	18.769875	32.35299	6.40015	1.0737585	57.508498	10.668113	0.6654293	3.55809	4.252367	8.7430565	1.00396	1.579886	1.804126
ENSG00000282033.1	AC074387.1	2.72539720124769	0.673205885720356	5.15720696704992e-05	0.00622512616583659	1.85063	0.91615	0.490988	0.377437	1.05232	0.319641	0	0.477527	0	0.140283	0.0732865	0	0.0644388
ENSG00000137868.18	STRA6	-3.05047505275505	0.754657333766053	5.29522832443299e-05	0.00635124711467371	0.2921248	0.0457273	0.0239736	0.11772225958497	0.0823574	1.3079099	0.0852713	1.0898456533573	15.6368938143408	6.4346503	2.3732500125535	4.3627138	8.7019560693062
ENSG00000014914.20	MTMR11	-1.41893927716833	0.351099857600947	5.31302547075149e-05	0.00635124711467371	27.589194	14.119137	18.713702	18.135056	5.3596473	14.3612969	52.46157	32.17821	81.49743	44.14612	24.413876	74.82392	34.619389
ENSG00000132680.10	KHDC4	-0.743455638480869	0.184030035886358	5.34830453529039e-05	0.00636268248681542	33.1247088	18.95122024432	27.481509	27.830306	19.174792	24.279382	43.8955097	35.302488	60.710008	53.325848	36.61707375681	46.8072421	44.502615
ENSG00000165376.10	CLDN2	-3.21191883500027	0.795865541332805	5.44268444074466e-05	0.00644398212852759	0.1478680209325	0.28573	0.276803	2.812350560714	1.526748501125	5.871380391199	5.1047040551073	9.2861	151.10498	23.30700142606	5.605600078172	138.096472	0.6220030650015
ENSG00000211896.7	IGHG1	-3.30219799060636	0.819011401965674	5.53202784650515e-05	0.00651857281246523	545.49765	17.2304518	19.463658	1070.845905	175.421058	889.858768	395.171278	76.714714	20293.55467	21531.61761	4030.569741	1627.956463	38867.80334
ENSG00000179772.7	FOXS1	-2.37322811469293	0.588881849421028	5.57630490048292e-05	0.00653960496504502	3.5479	0.434205	0.682923	0.735816	1.13476	0.319374	0.814966	5.88859	14.5781	7.68847	19.0908	2.85237	3.37855
ENSG00000267385.1	AC011498.4	2.41526407255967	0.600731826137024	5.80658175224391e-05	0.00677754082355074	0.578985	1.70766	2.43359	1.07696	4.24843	0.633672	0.546863	0.647373	0.150429	0.136176	0.379431	0.051652	0.0786662
ENSG00000186352.8	ANKRD37	1.65503373340063	0.412014700004604	5.89615171973322e-05	0.00684977813637552	27.753644	15.096836	6.062283	4.778532	20.891384	21.776884	4.218607	4.92992	3.909685	7.32445	4.586582	2.838458	7.675375
ENSG00000172460.16	PRSS30P	-2.49575135791403	0.621590615734611	5.94194294125048e-05	0.00687071860192724	0.5092236	0.1081292	0.228016	0.23631933344	0.14075600364437	0.177669351	3.684643	0.4898949	5.407797	0.6907283	0.3044748	0.417804616571	1.054162
ENSG00000168928.12	CTRB2	2.70938094905028	0.675022515374234	5.97581422186645e-05	0.00687774525209699	0.1563591	0.13513430557037	0.571867	0.1087886520749	0.880717	3.1314198	0.11003530188456	0.1303354	0.1271857	0.0663395	0.1198875	0.0463812	0.130827432899
ENSG00000143512.12	HHIPL2	-2.48362111003972	0.619097745910499	6.02885697087467e-05	0.00690666971038397	0.13302789	0	0.1321931	0.1014855	0.0959081	0.121628	1.702699	0.2022557	0.3020228	1.312173	0.2128789	0.4656332	0.7405941
ENSG00000239605.10	STPG4	-2.71625404307526	0.677850237358433	6.14533547848974e-05	0.00700766481176169	0.1928698	0.07037086	0.278196	0.170163	0.2984323	0.0688222	3.0299328	0.045129	1.963508	1.05672	0.22599801	5.184979	1.6886486
ENSG00000261326.3	LINC01355	-0.857536161431552	0.214330168826189	6.30739200591483e-05	0.00715946858653038	4.33431	2.60404	3.33018	2.83297	1.731188	2.864578	4.28958	3.95635	6.46228	5.65631	5.67234	7.52349	7.14498
ENSG00000129991.12	TNNI3	-3.46228184145086	0.867708682876946	6.60334344021781e-05	0.00746117504238309	0.15447	0	0	0.141129	0.059249	0.799486	8.233107	0.267339	0	1.362197	2.117628	28.934346	24.518218
ENSG00000186510.11	CLCNKA	2.37616489136406	0.595682928885296	6.63591416887473e-05	0.00746389527767297	1.2233514660941	6.144787	1.275671	0.7668253	1.0774399	0.1276775	0.203298	0.640838	0.1692707	0.28779	0.287494	0.1668487	0.3494694
ENSG00000169248.12	CXCL11	-2.81347295796536	0.706331024276971	6.79873196400694e-05	0.00761242635517429	3.10967	0.103649	0.217361	1.58961	1.37286	2.70901	2.792	1.16254	9.05769	20.1853	4.414502	56.168	33.6539
ENSG00000173338.12	KCNK7	2.27148283793915	0.570647233986915	6.87595534101556e-05	0.00766421238348784	1.033173	3.054257	2.260139	0.4908783	2.591325	10.956048	0.589325	0.785932	0.9197151	0.626633	1.144124	0.3117663	0.3138344
ENSG00000228742.10	LINC02577	-2.55009030388202	0.641184816638537	6.97452067316333e-05	0.0077155793029381	0.0176401	0.0824012	0	0.0813432	0.0179486	0.143299	0.0974361	0.2057737	0.823612	1.048087	0.501943	14.313794	0.495356
ENSG00000091704.9	CPA1	3.20290730665655	0.805394780557866	6.98439993476716e-05	0.0077155793029381	0.623799	1.1079314	0.9798088	0.15233	5.706922	0.154187	0	0.0449182	0	0.1013339	0.359639	0	0.105087
ENSG00000163273.3	NPPC	3.0718081965135	0.774835373156719	7.35605476797803e-05	0.00808357395794268	8.518938	0.571143	2.45535	0.184279	2.31731	10.09965	0.1319608	0.975635	0.17027	0.102672	0.609104	0	0
ENSG00000226812.2	AL117382.1	-3.28858273212622	0.829696350966456	7.38285598906869e-05	0.00808357395794268	0	0	0	1.06098	0.244529	0.287806	3.78884	0.895209	19.93426	1.01757	1.23627	2.07508	28.14295
ENSG00000134531.9	EMP1	2.57264369798361	0.650153865925479	7.59043316794026e-05	0.00827424091368643	90.837139	262.545712	83.778242	28.4610844	1120.911308	844.527314	35.540159	154.547523	98.95283219	50.037101	30.201235	32.76311665	21.607366
ENSG00000187720.14	THSD4	2.22359639914568	0.56261830018322	7.74265698870669e-05	0.00840315996427838	8.9869296	8.14280826153335	3.29048252	6.4761605	2.33720151	45.926531	2.8044103	2.47420983	2.6786862	3.4210409	3.1708354	1.455772	1.647587
ENSG00000109814.11	UGDH	2.27245171093896	0.57581591341685	7.93052515154374e-05	0.00850957974368346	10.887313	94.369177	11.71028	20.935296	191.801135	21.487203	10.383061	13.035277	15.8615118	14.3057497	9.8323	9.034339	7.889469
ENSG00000169194.9	IL13	3.26847300450369	0.828339950653322	7.95302836055709e-05	0.00850957974368346	2.7487688	5.7129805	0.431325	0.0362033	16.7548711	0	0.0291129	0.2512405	0.1628544	0.483918	0.0791313	0.3067609	0.2076174
ENSG00000135406.13	PRPH	3.08447588778999	0.781859386145753	7.97826833919807e-05	0.00850957974368346	39.300876	10.940388	40.7507316	2.021915	1.973003	0.426709543	0.4247246	3.166779	0.2401151	0.6679171	2.0896681	0.4316586	0
ENSG00000233818.1	AP000695.2	-2.08983811651633	0.529495921222327	7.918791793178e-05	0.00850957974368346	0.0975475	0	0	0.422623	0.3254518	0.177871	0.57241	1.151592	0.64696	1.11849	0.779872	1.61894	0.936405
ENSG00000139304.13	PTPRQ	3.15383265086521	0.800341759576132	8.12755556543887e-05	0.00855814308369297	0.0567878443	0.0182831059	0.0511221107	0	0.38908800880456	0.1679931947	0	0.01852900531588	0	0.0109557142	0.01145705164	0.00594671916	0.00505827433
ENSG00000135821.18	GLUL	1.71528972190042	0.435238379487024	8.11307587848007e-05	0.00855814308369297	292.9500597	1581.66709149	1475.743619	268.0565267	586.811006	380.751356	118.7486171	386.0794983736	264.321326	307.214196	163.523127	233.138968	221.092006
ENSG00000011083.8	SLC6A7	-3.25719660028477	0.826320862451264	8.08703493770095e-05	0.00855814308369297	0.0426027	0	0.014385	0.132971	0.0533436	0.0445066	4.2951296	0.0361808	1.04834	0.197298	0.0128939	0.214394	2.35574
ENSG00000008300.16	CELSR3	-2.27161668197643	0.57670059432278	8.18260451074815e-05	0.00857959951773148	0.9789446	0.4260763	0.7580786	1.733549	0.1944249	0.4753738	2.178177	0.8517233	2.6335583	7.51403	3.266024	17.32666	2.40932947
ENSG00000137801.10	THBS1	2.88678317513668	0.733208908273817	8.24411463077475e-05	0.00860762095099245	579.52499	2168.537	894.64955	15.983601	593.51149	11.181834	15.397909	96.732008	134.20675	153.16692	41.855664	15.195812	19.900761
ENSG00000278621.1	AC037198.2	2.94140218941216	0.747416791751503	8.30498463902803e-05	0.00863474138204826	36.492	67.4139	81.3013	1.33688	23.7662	1.22264	1.66103	6.75704	3.37237	7.86278	0.462837	0.150661	0.666417
ENSG00000259807.1	AC009093.1	-2.24887877028151	0.572404932248563	8.536195217021e-05	0.00883799793494496	0.414976	0.153446	0.0804477	0.148421	0.148907	0.129104	0.146172	0.599751	4.03074	1.57362	0.513557	0.550381	0.69132
ENSG00000151468.10	CCDC3	2.66427701186774	0.678805359548193	8.67477988244261e-05	0.0089440595079601	69.835621	118.044	20.7050325	9.7025793	299.863383	9.42314	4.10504	28.5438771	18.561321	18.697397	3.9142773	4.5070975	2.512752
ENSG00000130429.14	ARPC1B	-0.881959495753564	0.225004423352719	8.86434732831227e-05	0.00910158815929822	94.262832	77.029421	67.923007	93.025886	138.89748	93.2828989182	129.5815895	169.577236	274.753777	272.646367	154.420229	210.870679	167.14897257626
ENSG00000185652.11	NTF3	2.33545291795825	0.596366204262822	8.99784034271623e-05	0.00920047765621955	6.868076	18.741795	5.990962	2.587359	1.3524491	4.407359	1.821951	1.643436	1.941197	1.4555969	0.7922759	0.293519	0.106216
ENSG00000257512.1	AC124947.2	-2.69168545939038	0.687884647084486	9.11604679979394e-05	0.00928298675147741	0.0538624	0	0	0.336176	0.0503548	0.298165	0.934886	0.424919	1.08683	0.655455	0.489291	3.11882	2.71466
ENSG00000168906.12	MAT2A	1.57934185407528	0.404219557672104	9.33955685024293e-05	0.00943607485817051	356.31782	951.6231	674.303	124.21361	653.24023	205.65557	129.02051	194.43499	200.79455	204.1887	127.05806	264.81675	98.08011
ENSG00000099953.9	MMP11	-2.57815078431621	0.659869998936143	9.34264837442625e-05	0.00943607485817051	5.731071	0.946915	3.863483	3.5113224	1.094753	0.876912	1.983873	7.1874346	102.563194	29.529372	16.016728	16.719321	2.166806
ENSG00000253649.5	PRSS51	-2.70253639629765	0.692259265734504	9.46405194610027e-05	0.00951983599212403	0.243569064	0.1302238	0	0.169908	0.050897	0.212911365	0.585811	0.268456	2.400857394	0.303821148	5.1252567	0.9274177625	0.302640557
ENSG00000166573.5	GALR1	3.0897314031565	0.791814809157067	9.536630369112e-05	0.00955400479690998	0.393117	0.221893	0.186134	0.0677258	0.0191976	0.00401926	0	0.0307707	0.00978449	0	0.0231751	0	0.00409302
ENSG00000113525.9	IL5	2.74368323222965	0.703887334196298	9.70300155480984e-05	0.00967269137441706	0.468789	0.927085	0.6170925	0.0555958	0.91214	0.431214	0	0.0703163	0.0784837	0.14188	0.0741197	0.155449	0
ENSG00000262587.2	AC133552.2	-1.00011071204394	0.256690382646327	9.77236954376344e-05	0.00967269137441706	0.906005	0.876308	1.40889	1.185888	0.620679	0.764708	1.5725	1.66806	2.43839	1.73867	2.524117	2.79631	2.12549
ENSG00000224287.2	MSL3P1	-1.71925653906726	0.441195267209594	9.74658272831759e-05	0.00967269137441706	1.92025	0.3600839	0.605845	2.0162259	0.797402	0.941604	4.398697	2.482744	2.129863	6.741349	2.255969	6.812795	5.050266
ENSG00000159388.5	BTG2	2.28843255934388	0.588588827012805	0.000101074192624024	0.00996446572303378	721.924	96.37675	1433.65	51.21351	162.61776	101.45758	54.88609	62.93675	89.1569	112.67722	54.55305	33.90175	94.78593
ENSG00000229404.5	LINC00858	-3.16005805574861	0.813273937240786	0.000102077026265442	0.0100233968846761	0.1059945	0	0	0.0157802	0.0189791	0.0842034	0.781947	0.0597706	2.269429	0.54889	0.128548	0	0.9109302
ENSG00000278828.1	HIST1H3H	-2.32530738956337	0.599249557377776	0.000104299551772599	0.0102011557652686	1.06614	0.70287	0.491325	1.02084	0.362663	1.11083	4.39695	0.860055	1.7689	8.08655	0.660292	18.3394	4.65335
ENSG00000135119.14	RNFT2	-1.77484214901114	0.457917125661993	0.000106230202069205	0.0103490801189074	1.0728847	0.317298194	0.5612205	1.893768	0.8165094	0.4748984	2.6747105014	1.0065702	2.803208251	5.977592	2.917125	4.7958159	4.467609
ENSG00000214078.12	CPNE1	-0.979878145003281	0.252983087325064	0.000107373696685741	0.0104194593117203	164.767932	91.186795	120.99039723872	115.363062024	101.754336	105.6734388	209.153101	162.692345576	306.6482069	410.933053067237	143.266150690378	238.3167079	294.5189365
ENSG00000122711.8	SPINK4	-3.51570245751735	0.908081319631861	0.000108135584817531	0.0104234646438938	0.490885	0	0	1.3409	0.225499	0.197412	44.7932	0	273.485502	109.981	0.223794	0.953604	0.390747
ENSG00000172687.13	ZNF738	-1.10509361125506	0.285458177579894	0.000108257442452241	0.0104234646438938	4.223636	2.226002	3.8022772	3.7753097	2.660672	4.2689039	4.1620966	5.096237	8.596974	9.709057	7.759267	16.641816	8.225776
ENSG00000279347.1	AC021945.1	-1.59952301555348	0.413634899272429	0.00011018585637925	0.0105680194422657	0.103976	0.134001	0.281012	0.135209	0.129889	0.218879	0.273465	0.478219	0.632061	0.331224	0.661015	0.688886	1.05451
ENSG00000228649.8	SNHG26	2.28946314100149	0.592448431145253	0.000111358424678737	0.0105983239179821	6.57424	21.33469	12.405549	0.973222	17.3727	1.251937	0.844485	4.69883	1.36628	2.78403	0.880291	1.512135	1.0683399
ENSG00000183914.14	DNAH2	-2.28297067628577	0.590713029019386	0.000111193401738508	0.0105983239179821	0.04602278	0.1294937	0.03644448	0.143645	0.0432138	0.0846202	0.3026332	0.0906654	0.661894	0.8865638	1.2916319	0.5646352	0.0737602
ENSG00000164483.16	SAMD3	-2.32964752519364	0.603110792438431	0.000112131958368596	0.0106310548269384	1.1752381	0.3807173	0.2007736	1.52483	0.713994	0.517336	0.688176	2.8385114	2.00122732266	5.990609	2.19282	5.9641529	16.5704552
ENSG00000171492.14	LRRC8D	-1.05836705367889	0.27413845400669	0.00011306142961232	0.0106782636479269	4.761864	3.0245238	3.474902	5.28963	3.2557573	6.876614	8.396069	7.515364	9.547811	10.409873	8.973462	17.251992	11.221967
ENSG00000140044.12	JDP2	1.15314744282748	0.299005562549982	0.000114971001874649	0.0107356884580686	37.200582	29.6585527	21.8446246	20.205618	56.63374	23.988722	12.294756	23.803337	20.481822	10.772698	17.270457	15.120592	8.405613
ENSG00000112818.9	MEP1A	-3.48945267713948	0.904399534240355	0.000114174338028155	0.0107356884580686	0	0	0	0.0582678	0.0350456	0.0882933	8.109096	0	6.60616	0.173253	0.0169516	0.193901	8.49615
ENSG00000276180.1	HIST1H4I	-2.16291509608093	0.560715839157631	0.000114591333181346	0.0107356884580686	0.275618	0.399724	0.419128	0.394233	0.38685	0.544504	1.5222	0.452882	1.36767	3.19365	0.417248	8.53623	1.80132
ENSG00000124374.8	PAIP2B	1.29653462877884	0.33631732896455	0.000115685575509312	0.0107618028796163	2.93493	1.8766	2.67107	3.12236	1.04105	5.16928	1.14821	1.47365	1.30739	0.933112	1.54623	1.39512	0.762113
ENSG00000174010.9	KLHL15	1.59013261971261	0.412849714993836	0.000117347828535662	0.0107663730481343	9.51019	11.0248	12.0882	1.8084	4.08344	1.75333	1.2671	2.41273	2.43535	2.80256	2.11912	3.03535	1.73166
ENSG00000171621.13	SPSB1	2.3795417463351	0.617465625808325	0.000116335004539344	0.0107663730481343	19.397	206.4535	36.78435	6.13735	170.2976	12.527816	6.32876	14.767	21.6858	14.2886	16.7529	8.96859	8.89517
ENSG00000132510.10	KDM6B	1.95274732680992	0.507023700390325	0.000117448037295984	0.0107663730481343	28.926487	110.8837	36.764812	7.850783	109.3359636	17.951134	7.805743	11.281333	24.94152	18.5346067	9.773547	13.123754	9.632586
ENSG00000161912.18	ADCY10P1	-1.21520541522021	0.315528258263634	0.000117475074681603	0.0107663730481343	1.17318	0.8366453	0.755774	1.347128	1.5599198	1.051811	3.450557	1.779178	3.786444	1.5790313	3.636336	2.988139	2.80893
ENSG00000213886.3	UBD	-3.08719660570373	0.801816650758323	0.000117996090100319	0.0107742186329609	10.99	3.9748	6.37521	68.2766	7.33831	65.3087	16.1444	13.0702	291.766	363.091	20.2704	1459.29	1845.32
ENSG00000177000.12	MTHFR	0.738731757109552	0.192293690708246	0.000122192665370948	0.0110815449605351	17.6731166	16.155015521449	18.043002848537	11.1377393	12.019087	11.313307	8.8543492	13.54481472	7.1403360534804	10.3642982	8.766988	9.9696849	6.3408953
ENSG00000143819.12	EPHX1	1.92624959249936	0.501424490146354	0.000122257497442962	0.0110815449605351	107.989638	128.734025	82.39678	28.763557	443.453549	97.447915	29.0850493	65.8973	18.216941	34.073995	58.406014	31.508089	31.915
ENSG00000204271.12	SPIN3	-0.897263312273783	0.233896313750827	0.0001249738126084	0.011286412383193	8.5543072723142	4.12018426134647	6.070540626	4.941612159141	3.68374604507	4.2624417278121	8.33537879264969	7.0622114454718	15.260044743195	10.2645934051111	7.6677690945	16.6536044896517	10.163042447924
ENSG00000170537.12	TMC7	-2.13857939835053	0.557780373959002	0.000126030688803728	0.0113404705252664	0.779015	0.465757	0.375236	2.266591	0.9589789	0.6713761	13.518332	2.287066	4.649514	4.437282	1.1404555	4.450276	4.468808
ENSG00000267452.2	LINC02073	-3.13786252402031	0.819271869802805	0.000128110679052232	0.0114858650476358	0.0190006	0	0	0	0.035667	0	0.0462049	0.0794667	0.127549	0.376655	0	0.2159779	0.563272
ENSG00000237978.5	KCNMB2-AS1	-2.48874919757244	0.650642649612108	0.000130738590412944	0.0116791567500661	0.256102	0.0754836	0.426813	0.199884	0	0.618425	0.973193	0.508165	5.554213	1.965609	1.760093	0.746806	2.534748
ENSG00000198010.12	DLGAP2	2.34331447099594	0.612861070225544	0.000131535604811518	0.0117080882771979	0.2245454	0.0638173	0.0823579	0.0610912	0.579037	0.0400136	0.0200544	0.0921368	0.029223325938	0.03268906	0.023072	0.0143681	0.00814963
ENSG00000154451.14	GBP5	-2.65429943920794	0.694721157286628	0.000133090287626011	0.0117618541689487	8.020843	2.186264	1.6539143	10.725754	4.192162	8.908197	3.518575	8.525226	23.023026	65.10506	8.759754	78.59021	228.899198
ENSG00000133106.14	EPSTI1	-1.54880382559302	0.405300434854866	0.000132711167497712	0.0117618541689487	10.486125	2.6026329	5.3906078	6.893551	8.1316347	8.114908	10.2497528	9.8855179	53.268811	20.2824935	14.450699	24.990169	34.235822
ENSG00000169297.7	NR0B1	3.43441676109771	0.89929628917817	0.000133991206455721	0.0117993323976755	0	0.320046	0.0279653	0.0861335	1.70792	0.0217718	0.021776	0	0.0264787	0	0	0	0
ENSG00000116044.15	NFE2L2	1.15040686790982	0.301337637028238	0.000134719384898264	0.011821387160665	71.344782	92.147757	63.653847	51.2437054	120.503701	177.566383	35.584322	46.488788626912	60.658999	58.671014	38.108354	55.3878852	40.191155
ENSG00000224728.1	IMPDH1P8	-1.97261828561353	0.516884152331269	0.000135432440308151	0.0118419637294176	0.151713	0.0733272	0.11533	0	0	0.1198	0.329183	0.149537	0.364111	0.494318	0.310029	0.39508	0.425092
ENSG00000236714.1	LINC01844	2.70998179642892	0.710658536511693	0.000137101941829663	0.0119457308118838	0.962194	0.596018	0.899933	0	0.671098	0.0389159	0.0389345	0.072925	0.0236672	0.085716	0.0896154	0.0466325	0.0197624
ENSG00000008517.16	IL32	-1.82018172944465	0.477742799261494	0.000138988366475424	0.0120676039594188	176.35292893443	120.63537727845	111.34718	213.957268	139.904382	101.732608	181.941891	173.9893234772	484.646579	672.978298	289.935007	874.226333	1600.951424
ENSG00000204019.4	CT83	-3.48727250700501	0.916656935348614	0.000142184118021013	0.0122164791681596	0	0	0	0.112514	0	0	22.6408	0	14.628	12.3179	0	0.138735	9.08288
ENSG00000204410.14	MSH5	-1.37474532029875	0.36128102720246	0.000141691626643752	0.0122164791681596	8.6684834	5.6639118	8.0091783	15.2331987	4.9275518	10.847072	29.9828167	11.3034374	28.1615736003118	32.1627101	19.4101676	44.098248	21.029203
ENSG00000260476.1	AC104794.3	-3.25233211307293	0.854644853732753	0.000141530645236359	0.0122164791681596	0	0	0	0	0.0448597	0	0.302665	0.0472786	0.09212	0.125025	0.566244	0.0454775	0.690692
ENSG00000101938.14	CHRDL1	3.0322142678741	0.797584403995961	0.000143679293147005	0.0123022287505974	42.6486080139	79.56074	30.879366	5.545798	243.65799	2.8356570011204	0.0593143	13.739089	2.621839	11.48113	2.723198	0.0647787	3.341759
ENSG00000170439.6	METTL7B	-2.13240048950997	0.562183889031728	0.000148798699320952	0.0126966338437826	0.689911	0.483567	0.195016	3.75286	1.80184	0.942001	12.0533	3.90667	8.49665	7.95739	2.90076000094876	7.835	10.3196000004633
ENSG00000257138.1	TAS2R38	-3.42563736349042	0.904113497779643	0.000151287695389415	0.0128646529979762	0	0	0	0	0	0	1.26133	0	0.665645	0.0926423	0.19364	0.101163	0.127902
ENSG00000167914.11	GSDMA	-1.59302573846838	0.420709808885475	0.000152772341253523	0.0129367681859902	0.153532	0.0494548	0.0777836	0.299486	0.263988	0.1768863	0.444196	0.690108	8.19908	1.015096	0.628104	0.386979	0.573891
ENSG00000122085.16	MTERF4	0.525187438829482	0.138723624466189	0.000153181373145893	0.0129367681859902	26.707092013	22.4018237	26.54492	19.986558	27.176452	22.293152	12.55918116	27.314813	21.228461	17.556101	18.153685	17.256716	15.7613117
ENSG00000198848.12	CES1	2.6494554091558	0.700600481862756	0.000155765860590998	0.013110293266409	83.155423	102.33743	143.264391	2.1147157	209.244074	23.289656	4.779516	20.947496	20.604005	4.141901	26.3006674	1.047437	1.67483
ENSG00000235277.1	AF127577.3	-3.42637544202328	0.906691528702437	0.000157467684230065	0.0131639792103816	0	0	0	0	0	0	1.97792	0.0853526	0.665851	0.150439	1.10021	0	0.207231
ENSG00000224137.1	LINC01857	-2.60948705424158	0.690416361603429	0.000157090208003359	0.0131639792103816	0.171807	0.166526	0.174728	0.401877	0.158549	0.686573	0.135471	1.01997	0.996734	6.58903	3.28295	2.15499	6.42772
ENSG00000136997.17	MYC	2.08539942400103	0.552182509219244	0.0001589525982061	0.0132433738808416	120.074683	333.398243	213.595732	18.76318454	331.790441	123.648197	20.260148	41.06580732	84.979752	26.0982824	7.121221886	53.4089678	68.74151
ENSG00000189320.8	FAM180A	2.89637068725505	0.767450067743144	0.00016063889616937	0.0133389580057418	2.370649	11.86953788	0.878228	0.20575	26.279287	0.396601	0.148784574	1.46866928	1.503053	0.6544444	0.444797	0.0594287	0.211114
ENSG00000115137.11	DNAJC27	1.16624406048079	0.309333877870334	0.000163130565040865	0.0134555527731207	5.1923047	7.901041	5.309801	2.0297127178	3.8698	2.4598451	1.2593093	3.388943	2.934837	1.608845	1.970873	1.90900795	1.86304258
ENSG00000260000.2	AL133338.1	-1.67864460677419	0.445219049369304	0.000162999741097893	0.0134555527731207	0.801332	0.331978	0.54148	0.68476	0.178686	0.873841	1.50537	1.20357	2.63756	2.25453	0.901081	1.58997	4.64327
ENSG00000105825.12	TFPI2	2.62355713512406	0.696455060260551	0.000165210625623269	0.0135818502692617	13.382971	43.590985	9.084277	0.641998	26.240154	1.0463226	2.05605	2.02938507	2.355588	5.12833	1.1848938	0.5765204	0.2072693
ENSG00000162413.16	KLHL21	1.54574204515501	0.41076086661693	0.000167807263056985	0.0137496381600831	60.06595	72.677	36.516609	8.38018	48.49743	19.914493	9.21459	18.10994	10.559022	15.20774	24.433589	13.86353	8.54308997
ENSG00000214456.8	PLIN5	2.35330462253658	0.625788708136409	0.000169545709798138	0.0138462329668479	3.2219603	15.1874476	17.499169	9.184844	50.927257	3.4946554	7.423437	3.4968951	1.3080415	1.6245922	2.2018019	1.2207749	0.9557292
ENSG00000232803.1	SLCO4A1-AS1	-2.89456541735934	0.770028135479435	0.000170567583062125	0.0138838646147115	0.0860871	0.1999633	0.446839	0.848119	0	0.575942	10.91757	0.875185	20.68254	1.088904	0.608463	3.949902	0.524679
ENSG00000230666.5	CEACAM22P	-2.24439815452679	0.598752547270967	0.000177925861086653	0.0143881550084615	0.0178468	0.0344854	0	0.0278683	0	0.0484382	0.0563302	0.287871	0.1765124	0.186128	0.0486151	0.134793	0.128699
ENSG00000130720.12	FIBCD1	-3.07514982188376	0.820277308573565	0.000177601334405117	0.0143881550084615	0.157051	0.367104	0.15912054	0.242883	0.145466	0.035382	0.8601363	0	23.3558845	0.0747569	1.1348951	4.4283514	0.8037473
ENSG00000211710.3	TRBV4-1	-2.51699986444622	0.672369927355423	0.000181492828238025	0.0146287949014656	1.13186	0.275136	0	0.662985	0.519588	1.14116	1.34415	2.80951	1.65238	6.68149	1.03339	6.61073	17.5918
ENSG00000173276.13	ZBTB21	1.72101192505982	0.460139262111568	0.000183875388771562	0.0147309632461999	6.8711139	26.622681	5.380867	2.3026852	9.029091	3.613713	2.297614	2.8058993	2.799015	3.607738	1.8600779	3.736465	2.335745
ENSG00000198556.13	ZNF789	-0.872082014992828	0.233171111123185	0.000183951005984068	0.0147309632461999	13.753877	7.662456	12.4458000025321	13.013612	6.212284	11.17161	22.179049	18.785993	24.117258	19.0306421	19.7723243	32.078103	15.2016018
ENSG00000095303.15	PTGS1	1.46675203916478	0.392912448982792	0.000189193723278269	0.0151019312339379	39.463496	38.456267	38.682067	20.16422409457	9.95682504117	26.2724682	9.8663414	19.94816	8.5850355	10.1007183	15.9204122	7.0220954	3.333224585535
ENSG00000115226.9	FNDC4	2.31241880988103	0.619979067437907	0.000191606202735809	0.0151614640220156	17.92851	52.98666	17.01777	5.222791	111.47955	11.00571	4.463867	12.822038	9.200961	6.17938	6.643774	6.860456	0.4147372
ENSG00000206120.11	EGFEM1P	1.8828088690399	0.505044890516323	0.000193003078073749	0.0151614640220156	1.10455	1.0705228	0.989677	0.77838298686	2.5851643	0.261179862	0.1289677513	0.5180602	0.756695548	0.2194685	0.335103637	0.2807488	0.0820128
ENSG00000162706.12	CADM3	2.72531377897081	0.73074272634792	0.00019185095734734	0.0151614640220156	10.543037	19.1471	13.87556	2.172732	43.325546	3.40099	0.327955	7.431545	0.807664	0.5272823	2.587228	0.0510308	0.315675
ENSG00000205177.6	C11orf91	2.18161282583598	0.585152169238287	0.000192788890318544	0.0151614640220156	0.523086	4.36765	1.31454	0.73657	6.416965	1.511596	0.601616	0.295746	0.445476	0.892698	0.0983469	0.577949	0.534521
ENSG00000166170.9	BAG5	0.598956042711683	0.16056622126403	0.000191271447386562	0.0151614640220156	12.04117948	14.5912573203	11.1432079	8.234677586	13.549245	13.2998016	6.1347314039	11.247661	9.738812	8.809124	9.2760361	8.7492482	8.0412414
ENSG00000138079.13	SLC3A1	-1.90325476912116	0.510715810681423	0.000194048102091807	0.0151953173615878	0.4099026	0.1716517	0.3234189	0.6600123	0.0826466	0.2374269	1.746089	0.6836719	3.2909964	1.604982	0.534884	0.6089551	1.707646
ENSG00000160712.12	IL6R	1.66805735251904	0.447877903514649	0.000195813411852543	0.015285182575051	15.4787482	46.7068688	17.7210837	8.3287593	21.0233314	4.9541811	2.875239	10.8089097	4.854753	4.9560652	6.5266521	4.5523047	8.2304389
ENSG00000176533.12	GNG7	1.42518565567044	0.382800258810548	0.000196828175951421	0.01531607928905	8.38427	9.119796	7.996544	12.266832	2.64997	4.8581206	2.67155	5.132016	1.81511	2.21022	3.64317	1.63237	3.23592
ENSG00000197408.9	CYP2B6	-3.39517052713069	0.912870905805469	0.000199836515585277	0.0155014250098987	0	0	0	0.063963	0	0	0.5399450166893	0.2803735280482	3.747825640562	0.277068357002	0.0553541	0	10.793898
ENSG00000182050.13	MGAT4C	2.69766285402895	0.726392139449234	0.000204183810933451	0.0156425027911711	0.318258	0.5542972	1.310023	0.1412923	0.2656475	0.032354	0.0067108	0.2565908	0.0199727	0.0251111	0.02627445	0.0152347	0.00324935
ENSG00000128016.5	ZFP36	1.87519308994792	0.504835054175707	0.000203632534207964	0.0156425027911711	801.43756432	661.1235365449	1886.1581602419	115.070756944	1520.820057	449.195622729	177.4224796	184.227781	319.432653	391.6062358	66.2959364	427.6066538	136.91469998
ENSG00000102854.15	MSLN	-2.96115933501124	0.797090746652335	0.000203236753703751	0.0156425027911711	0.105303	0.111988246	0.051209	1.550983	0.106289	3.111407	19.221335	0.15562524	26.5815282424	35.899835518	18.762476	5.969022	2.1230788
ENSG00000146143.17	PRIM2	-1.14703781916488	0.308850124337417	0.00020409118544148	0.0156425027911711	3.5530133	1.98121	3.770003	3.8138355	3.141	4.4412631	4.2194298	4.6993349	8.493541	7.5024564	9.9389471	15.3284747	10.8682222
ENSG00000258354.1	AC138932.2	-3.20151232970394	0.862427880492604	0.000205458416214421	0.0156506054395978	0.0399165	0	0.027037	0.0311771	0	0	1.35762	0.146055	0.11683	1.78473	0.0241695	0	0.118292
ENSG00000163508.12	EOMES	-2.50795600168416	0.675618242156569	0.000205554526889039	0.0156506054395978	0.9577680128733	0.12951399	0.379916	1.313039	0.3538049	0.756641	0.7299265	1.838589	1.458129	6.01297	1.572974	2.497152	23.62398
ENSG00000180806.4	HOXC9	-2.81816484995729	0.760666465260801	0.000211505227836627	0.0160294590689342	0.26365101925	0	0	0	0.8551551884	0.4199981729	3.31651	0.52116096235	2.290201	5.96168	0.763032	7.87541	3.44696
ENSG00000244953.1	AC087521.1	2.94982299558229	0.796285598143224	0.000211825949304566	0.0160294590689342	4.30853	7.2931	19.1502	0.148898	2.87496	0.214879	0.128957	0.675474	0.839516	1.04673	0.197268	0	0.0218164
ENSG00000187566.5	NHLRC1	-1.24234780387542	0.335484639739602	0.000212944246177119	0.0160649554013805	1.22696	1.23305	0.547004	0.785025	0.575434	0.812835	1.72328	1.69244	3.03665	1.89693	1.09189	4.98597	1.98529
ENSG00000248290.1	TNXA	2.77704041190066	0.75017672542359	0.000214034608873456	0.0160981349439929	2.82217	6.16604	1.83126	0.325143	12.257	0.12902	0.198784	1.2071	0.0736913	1.00504	0.0827669	0.0740674	0.130343
ENSG00000168490.13	PHYHIP	2.30150632101105	0.622371217327761	0.00021733575106773	0.0162968883641545	16.724506	17.706064	3.429721	0.831016	6.5032112	4.7337415	0.3348417	5.014095	1.42334	1.682879	1.2278	0.528539	0.2448748
ENSG00000187957.7	DNER	2.52948869271967	0.684358374567154	0.000218896839151504	0.0163643573559032	3.933991	0.936168	2.97813	0.2917211	1.298245	0.1914557	0.155517	0.628813	0.0629918	0.0570487	0.440486	0.074568	0.0131605
ENSG00000099715.14	PCDH11Y	2.50467817776868	0.678649657291598	0.000223656055860214	0.0165082962739105	0.9574341	0.130696	0.8955533	0.0924135	0.0314167	0.0263455	0.0440112	0.0615414	0.03790197	0.0580533	0.0775084	0.0106306	0.0178628
ENSG00000184697.6	CLDN6	-3.18815298510697	0.863972558963345	0.000224157912630186	0.0165082962739105	0	0	0	0	0.0804786	0	0.203509	0.0965439	0.185758	1.568986	0.0390467	0.04074	1.135452
ENSG00000146070.16	PLA2G7	-2.48120695450543	0.671987075638156	0.000222197277265333	0.0165082962739105	1.169488	0.345379	0.363357164	2.05151122607	5.96698	2.025505	3.050222	2.56118	6.32889	23.63415	6.63807	35.0097	44.7834
ENSG00000267547.1	AC060766.4	-1.19953191093566	0.324867386681054	0.00022217036925862	0.0165082962739105	1.78787	0.577446	0.908654	0.929371	0.826849	1.42607	1.7621	3.38853	2.58992	2.46617	2.03275	3.44021	4.03552
ENSG00000268941.2	LINC01711	-2.87376980831634	0.778627323842394	0.00022353622318275	0.0165082962739105	0	0.0633684	0.0664487	0.102211	0	0	0.155039	0.452364	2.83436	0.569591	0.654738	0.0622866	0.157146
ENSG00000272953.1	AC092171.4	-1.65817333378013	0.449628524109214	0.000226135592595158	0.0166045259310599	2.25765	0.225165	0.354264	1.81354	0.43174	0.832229	3.75938	2.98653	5.60459	4.04852	2.4313	4.23147	2.41172
ENSG00000229970.3	AC007128.1	-3.28930394656331	0.893252801212094	0.000231058830355021	0.016871161321299	0	0	0	0.0269021	0	0	0.314058	0	0.978573	0.179905	0.111055	0	0.53991
ENSG00000060138.12	YBX3	1.65706071150579	0.450097577086813	0.000231812279217686	0.016871161321299	526.245706	1133.142033	582.368105407369	91.1558248	610.252841	286.862581	98.537148	318.135336	177.775317	203.875732	231.254711	95.242664	97.395107
ENSG00000169245.5	CXCL10	-2.30546177292309	0.626183267429094	0.00023162176579156	0.016871161321299	10.1435	3.23637	5.63837	3.85643	8.08911	20.1513	5.89037	5.94025	37.7436	78.7653	24.1812	128.644	138.542
ENSG00000206195.10	DUXAP8	-2.34970904910051	0.638509578190946	0.00023324283300115	0.016925495315582	0.5854579	0.1210505	0.642902	0.8551771	1.426303	0.4658858	4.2267344	0.4953093	19.277948	3.990966	3.15854	0.666357	4.136083
ENSG00000100425.18	BRD1	0.45698860922163	0.124213061221516	0.000234085557642984	0.0169369798943732	22.356716	20.036255	24.85665	17.252861	22.30708	17.19641	10.901212	22.299475	18.002654	14.837898	16.579236	19.63643	14.1588650002988
ENSG00000167748.10	KLK1	-3.0232091117918	0.822178185743156	0.000235925648890915	0.0170203503842732	0.362591	0.0729886	0.0643488	4.288142	0.336988	3.179164	9.71942	0.42782	22.314151	1.658639	7.1335376	67.275256	102.630978
ENSG00000120705.12	ETF1	1.24901521032198	0.339805735222156	0.000237222006029766	0.0170615975501033	57.937298	135.350006	67.472608	25.32099	102.602678	59.878384	19.872382	53.490558	32.687517	30.555297	37.959425	41.062352	24.1167419
ENSG00000261026.1	AC105046.1	2.62990061944371	0.715624853406012	0.000237876385321707	0.0170615975501033	0.628609	2.32765	0.647307	0.106277	2.60835	0.132032	0.0578711	0.288911	0.291229	0.20922	0.0380486	0.0691611	0
ENSG00000132854.18	KANK4	2.53445318047256	0.691046544438546	0.000244878156357072	0.0175130346215484	0.9307267	0.1709595	1.005536	1.2116331	5.4439262	0.4147711	0.1860221	0.7793833	0.2453745	0.1489028	0.0971014	0.0636962	0.0142645
ENSG00000170091.10	NSG2	2.87812131749336	0.785337285634693	0.000247510717850203	0.0176264781791396	6.1864744	1.649606	6.05955	0.365667	0.044438	0.0527896	0.158481	0.561974	0.1368707	0.116292	0.243173	0	0.0357552
ENSG00000181218.5	HIST3H2A	-1.8087160760575	0.493587154762798	0.000247889044507601	0.0176264781791396	2.67491	0.699403	1.54018	2.08661	2.83277	5.3257	10.1509	4.42244	12.0291	16.0309	2.759	24.494	7.97474
ENSG00000112964.13	GHR	2.50793797925412	0.684898119762442	0.000250480700710753	0.0177597276191621	8.6895430104999	6.85298038667596	8.29880354419313	0.87653742	30.8943250001299	1.41237200349721	0.3471199	4.13877900973381	0.971514	0.86992982935996	2.67176	0.230356	0.244647
ENSG00000279608.1	AL353795.3	1.60626556664179	0.438767384940527	0.000251370990345823	0.0177719290174497	0.100408	0.432299	0.37858	0.151785	0.181313	0.0717676	0.058025	0.0831153	0.105844	0.0674628	0.101122	0.0435231	0.0585741
ENSG00000167772.11	ANGPTL4	2.83181668534188	0.775185070922023	0.000259108761916398	0.0179908581735507	28.718366	67.358845	10.1356256	2.08081800030474	198.055276	8.49007759766	2.081033	15.930783	11.436474	2.924932	2.0298826	0.14618743	0.364872
ENSG00000154269.14	ENPP3	2.05457455232307	0.562248799208987	0.00025797619179283	0.0179908581735507	2.0305882	2.57361	0.80785	0.529569	0.710636	0.294186	0.147273	0.61840183654	0.390467	0.3927777	0.0462183	0.208214	0.0543823
ENSG00000156959.8	LHFPL4	1.889869987482	0.517342944060315	0.000259162587103468	0.0179908581735507	0.214775	0.0933598	0.261047	0.251385	0.110974	0.033834	2.878227	0.074034	0.0102936	0.027972	0.0389999	0.0303827	0.0258214
ENSG00000166349.9	RAG1	-2.18866701974768	0.599201232066996	0.000259556935459997	0.0179908581735507	0.181635	0.225772	0.175961	0.117083	0.3750478	0.235482	2.10635	0.163318	1.23711	0.305864	1.5721715	0.2461412	2.6833008
ENSG00000261578.1	AP003119.3	1.86714110350356	0.511026297795812	0.000258479756229563	0.0179908581735507	2.30387	0.571597	0.216786	1.24759	3.59473	2.58858	0.347701	0.260393	0.639647	0.557503	0.331486	0.961976	0.312781
ENSG00000270547.5	LINC01235	-2.58829535140917	0.707962823084453	0.000256204956889969	0.0179908581735507	0.560683	0.136924	0.3304166	0.0368545	0.177235	0.0186241	0.2936575	3.02657	6.02183	3.91747	0.514693	0.51432	0.113509
ENSG00000249082.2	C5orf66-AS1	2.9937939799223	0.819102382970456	0.000257212857081239	0.0179908581735507	29.8778	22.66937	7.9951	3.247058	0.1670221	25.6531	0.856385	0	0	2.21075	2.64409	0.0744256	0.434338
ENSG00000226396.1	AL031727.1	-2.00207795901925	0.5489518554573	0.000265224908322564	0.0183323752973236	2.35573	2.28424	0.998877	3.52122	2.53129	0.943502	7.12253	2.33263	9.12395	32.5323	3.93199	5.50815	16.2445
ENSG00000211934.3	IGHV1-2	-3.10524536887283	0.852376507129609	0.000269432453876826	0.0185209152907322	0.917583	0.667933	0	3.32911	0	1.10556	15.1052	0	13.7764	20.6278	1.88145	16.4686	120.674
ENSG00000069011.15	PITX1	2.42675638622212	0.666397987381884	0.000270946507789252	0.0185209152907322	162.712331	90.021833	60.356829	23.492586	1.53886	401.19407	15.338796	4.864467	16.675423	27.94475	21.659666	30.600369	14.190173
ENSG00000168066.20	SF1	0.661798981381814	0.181688237075153	0.000270005415922497	0.0185209152907322	202.98154645186	256.633491872	220.291168003425	138.834200005436	197.0538881	158.856928	112.914786	193.043892	173.651011441	111.823945003054	117.8795555805	144.7985	97.77215421024
ENSG00000162772.16	ATF3	2.21832412183388	0.609129845067809	0.000270746923914677	0.0185209152907322	194.84433	236.012230009	94.6500100576741	7.606857	197.685052	25.875115118019	10.420865	14.736933	12.4248656	71.966483	7.24742	32.512217	18.8228941
ENSG00000274976.1	AC087588.2	-2.74622514296425	0.755014454052432	0.000275495294852777	0.0187283820635493	0	0	0	0.516411	0	0.35424	1.39326	0.218666	3.85076	3.65932	0.402103	2.13956	2.98492
ENSG00000205740.2	AL359878.1	-1.43029691233303	0.393217745078515	0.000275385887090975	0.0187283820635493	0.2105649	0.05016	0.1782771	0.1275364	0.1091733	0.109117	0.3300189	0.2756425	0.6214247	0.270738	0.355777	0.245343	0.610852
ENSG00000145777.14	TSLP	2.14098431771077	0.58885279103886	0.00027705841216472	0.0187317224290055	2.00025	6.083142	1.7042	0.461125	2.231532	4.280501	0.735353	0.895766	0.479653	0.256642	1.34162	0.107376	0.14567
ENSG00000166596.14	CFAP52	-2.43254253810453	0.668955439884975	0.000276550322708635	0.0187317224290055	0.05871	0.0283698	0	0.0986578	0.0914467	0.0463233	0.2993072	0.194386	0.244061	0.3304727	0.147159295	1.09204	0.201763
ENSG00000182912.6	TSPEAR-AS2	-2.51557703751573	0.692953331925118	0.000283173428625651	0.0190411045960373	1.280043	0.0219541	0.2094944	0.2729963	0.148993	0.0891729	2.070673	0.417789	3.969464	8.14789	1.871962	3.305329	0.1731508
ENSG00000250848.1	AC021087.1	-2.15959140201297	0.594827527386503	0.000282743632088878	0.0190411045960373	0.0503254	0.0484483	0.0510211	0	0	0.119215	0.31624	0.148208	0.336925	0.261281	0.18205	0.332732	0.280626
ENSG00000072364.12	AFF4	0.739348760750924	0.203817669752489	0.000286177885039932	0.0190670325023313	17.010685	23.058353	20.1954237	13.2331972	14.7144379	13.7093652	10.5691247	15.0678643	11.08644	13.325963	10.4909422	8.2941733	8.236429
ENSG00000184557.4	SOCS3	2.35338085671339	0.6487746361356	0.000286262705038642	0.0190670325023313	335.691	467.163	662.722	14.5931	818.186	32.1138	22.1754	54.9801	133.998	101.002	12.372	106.497	33.5593
ENSG00000110492.15	MDK	-1.62821177880674	0.448903921592475	0.000286641183708516	0.0190670325023313	114.749185	31.8218972	118.438265	161.318416	71.519433398339	92.0003372615	250.54333	278.29079413764	200.3884072706	203.873914139	160.117787	954.935675	501.71138
ENSG00000171004.18	HS6ST2	2.62149002282877	0.722427783210714	0.000284827096112903	0.0190670325023313	4.12391	1.96895	3.485766	0.212677	0.0556573	2.326068	0.0374043	0.676943	0.193116	0.18521	0.484171	0.0782441	0.00949762
ENSG00000182472.8	CAPN12	-2.50874099880729	0.69187442063907	0.000287838349328984	0.0190953349977097	1.5678628	0.5342263	1.1255429	9.796677	0.5781823	4.590024	56.725558	4.4878715410178	17.494174	72.142381	5.862687	10.796533	20.919907
ENSG00000213468.6	FIRRE	-2.11384368875806	0.583344115198072	0.00029045769478105	0.019217581971543	0.2111462	0	0.0712162	0.4884288	0.1435955	0.1282408	1.6429881	0.6431947	0.4572772	1.4709392	0.5425969	1.00344	0.9903494
ENSG00000115523.16	GNLY	-2.03122941850362	0.560682150387759	0.000291451008354881	0.0192318805379774	6.3796991	1.9881827	5.46549	9.604161	11.50943192	10.613019	23.398507	16.484741	12.920412	27.46695	9.774607	99.208900239	94.014285
ENSG00000104833.11	TUBB4A	2.55648922589152	0.705893243262172	0.000292744484848913	0.0192658571212403	4.95726	1.832076	5.195206	0.3287115	0.6373695	0.1096776	0.0195189	0.547589	0.0409914	0.348784	0.122157	0.4393227	0.357863
ENSG00000196421.8	C20orf204	-1.68305737137204	0.464813987256525	0.000293549694306466	0.0192676052668793	0.828467	0.3057096	0.3248716	0.472054	0.1849409	0.3855016	0.96926762	1.205259	0.99368	3.915124	0.402602	2.742218	0.90639
ENSG00000272812.1	AC004908.2	-1.2302753979677	0.340265268982298	0.000299610985674396	0.0194986700022643	1.9626	1.56084	1.36444	1.04712	0.622004	1.51932	4.43463	2.47353	2.64607	4.20987	2.10835	5.38723	3.25129
ENSG00000258986.6	TMEM179	2.63332437226834	0.728703456302735	0.000301844417193508	0.0194986700022643	3.8667906	0.9341085	2.736123	0.20953485	0.292398	0.0647657	0.1288847	0.497754	0.0667634	0.0845884	0.189515	0	0.0652737
ENSG00000168079.16	SCARA5	2.86952711883216	0.793469824667506	0.000298695437111444	0.0194986700022643	4.3085	25.894201	2.76756	2.396232	84.152289	3.390452	0.971826	8.374413	1.4105959	0.1776911	0.238531	0.0619627	1.10536000958097
ENSG00000130948.10	HSD17B3	-2.30212121937222	0.637063942207005	0.000301925508751746	0.0194986700022643	1.0810893	0.686097	0.638402	0.946133	0.5498589	0.445195	13.189741	2.805529	0.6887553356	1.994069	0.811249	12.629796	1.12286751
ENSG00000102290.22	PCDH11X	2.27965119216775	0.630636088832186	0.000300528326992089	0.0194986700022643	0.087458906	0.0118858	0.0282411715	0.053824621	0.057193499	0.059340238	0.0173693	0.0108409	0.0053831163	0.01463054	0.00140103	0	0.01055200374889
ENSG00000103034.14	NDRG4	1.76042456576721	0.487499883747647	0.000304867934683519	0.0194986700022643	15.398330865	4.100691	14.23896594549	3.59328537097463	5.71799197159	26.44043755	2.0055299	7.84475900253197	3.36402130160852	2.28179725	2.48258860596415	5.3091974	1.17981125023709
ENSG00000168334.8	XIRP1	3.00312580380751	0.831643381801415	0.000304931618743395	0.0194986700022643	0.1910908	5.725709	0.4462649	0.00671515	11.352653	0.0330739	0.0496524	0.0826562	0.683981	0.273249	0.1333236	0.0594355	0.1008249
ENSG00000101104.12	PABPC1L	-1.73836154350943	0.480706970459618	0.000298889803688128	0.0194986700022643	14.723988	9.2663541	9.706884	25.7709203	8.4581035	23.184796	26.334149534	35.435224	64.605886	96.041369	18.2514542	47.318761512399	145.208213
ENSG00000228705.1	LINC00659	-2.78963321755098	0.772102546592439	0.000302634299045671	0.0194986700022643	0.147678	0	0	0.460601	0	0.117781	0.23288	0.146027	0.998252	1.02922	1.7462	6.67662	1.88246
ENSG00000273972.1	AC068722.2	2.30025781297594	0.637003757942131	0.00030494990062139	0.0194986700022643	0.583869	4.24272	4.59914	1.02434	0.135054	1.51315	0.11509	0.288654	0.422826	0.762936	0.132763	0.42113	0.348895
ENSG00000148798.10	INA	2.83299327215216	0.785287087109503	0.000309055215236032	0.0195807315276353	2.57004	0.881052	3.40976	0.0517515	0	0.300546	0.0392512	0.195995	0.0158988	0.129588	0.210775	0.015651	0.0531452
ENSG00000189190.10	ZNF600	-1.61395693643392	0.447496225629762	0.000310189806378382	0.0195807315276353	3.043763	2.564661	3.061298	6.2077929	3.2878762	6.9003425	29.195472	5.4653254	20.070257	13.352216	6.733862	15.917035	12.75355927319
ENSG00000124557.12	BTN1A1	-2.92921256220463	0.811674029067106	0.00030755336385401	0.0195807315276353	0.0745924	0	0.018892	0.0145507	0.0350067	0.0587966	0.0147148	0.0551108	2.3213632	0.0323893	0.0507982	1.3734	0.657421
ENSG00000235385.1	LINC02154	-3.19176354712484	0.884821069507144	0.000309469241866158	0.0195807315276353	0	0	0	0.0539147	0	0	0.1156634	0	0.0371988	0.134666	0.1884025	1.591513	0.942053
ENSG00000161243.8	FBXO27	1.79329250590562	0.496965900230181	0.000307993878356584	0.0195807315276353	6.331506	2.78724	8.370378	1.83871	7.074603	15.528577	1.962973	2.085775	1.111628	0.8084931	4.6345909	2.065017	1.0661966
ENSG00000279255.1	Z97653.2	1.96376955371572	0.544911288127327	0.000313557965748033	0.0197429818382572	0.742681	0.438764	0.376416	0.321915	0.270397	1.56436	0.130216	0.284706	0.198085	0.0358524	0.187376	0.273637	0.0330261
ENSG00000164932.12	CTHRC1	-2.22730508562252	0.618291724083841	0.000315349658860603	0.0198053992601666	21.290329	3.278308	4.998533	3.25527	10.987563	1.63166311701	4.966444	21.709349	169.32405	80.070956	18.91574	24.040442	25.349407
ENSG00000170703.15	TTLL6	-2.8012243978891	0.777875076501378	0.000316844731983117	0.0198489187162588	0.08724954	0.0413626	0.016055	0.7339747	0.0545312	0.2070761	9.163673	0.2108669	0.6627002	0.371767	0.597723	3.4913996	2.7240294
ENSG00000162407.8	PLPP3	1.80244056172373	0.500669249015685	0.000318140766086992	0.0198797809515723	43.437128	120.761874	39.611705	25.0426862	161.106952	16.116707	19.5610946	34.4602956	22.277973	20.895889	19.974442	11.810511	7.3168797
ENSG00000114346.13	ECT2	-1.74784802921331	0.485594168093507	0.000318951294971906	0.0198802261815613	3.09284	2.607476	2.496002	9.417098027	5.189667	10.2228604	12.1373469	10.1091960003412	14.619706059	22.124976524	20.2333513	67.048197	21.5799637
ENSG00000236081.1	ELFN1-AS1	-2.80233359429964	0.779516765033457	0.000324438216286059	0.019970705626862	0	0	0.350202	1.255235	0.106718	0	0.634511	1.70323	1.10828	4.204306	3.136891	9.4689	9.81695
ENSG00000138315.12	OIT3	-2.00651089205866	0.558119433481153	0.000324231923972433	0.019970705626862	0.46602119	0.0346482	0.141116	0.1398371	0.261322	0.109831	0.384646	0.503146	2.71648	1.53226	0.1627751	0.701856	1.02274
ENSG00000167971.15	CASKIN1	2.03134636314355	0.564812098651267	0.000322528350784572	0.019970705626862	0.625039	0.206167	0.230591	0.0344972	0.120276	0.0564107	0.00869923	0.0609675	0.0499551	0.0970731	0.0287881	0.0204182	0.0450155
ENSG00000048471.13	SNX29	0.669102063994597	0.186120720361568	0.00032440446906143	0.019970705626862	6.0382967	5.5631702	6.318959	3.848154	6.665584	3.9809663	2.548221	4.939148	3.894306	4.38045	3.671356	2.7614108	3.6775966
ENSG00000106397.11	PLOD3	-1.11555653996233	0.310177855626187	0.000322520063319549	0.019970705626862	47.49517	31.672566	38.1900274	37.256997	55.385011	16.046185	71.672621	64.963056	124.912426	160.384693	53.143421	105.488107	65.636986
ENSG00000073670.13	ADAM11	1.89092622763324	0.526090998334694	0.000325271173256415	0.0199722957375434	2.057178	1.540743059	2.684884	0.17690064	0.529241	0.3607666	0.0953314	0.588858	0.2114074	0.491307	0.351878	0.235867	0.180971
ENSG00000165556.9	CDX2	-3.2171824007411	0.896125718745519	0.00033054906111936	0.0202461299935608	0	0	0	0.822544	0.0245014	1.154924	18.18311	0.1303027	70.6627	3.10009	0.959103	9.67046	35.5277
ENSG00000101342.9	TLDC2	-1.45709374526256	0.406164296786131	0.000333928878936683	0.0204026422451561	2.566777	1.37515	3.888267	4.1663208	2.6005355	2.6179386	10.0209	5.472063	10.99845	5.715885	2.725496	14.37598	13.92462
ENSG00000186854.10	TRABD2A	-2.40549266687951	0.671317794438472	0.000339358744405871	0.0206833303702544	0.9369349	0.5877958	1.3642656	2.34213285076	1.777741	1.1401002	2.723177892564	4.210358	49.458739	1.236797	2.690217	1.5776072	18.786194
ENSG00000102802.9	MEDAG	2.97821797496986	0.831797152422922	0.00034298741474757	0.0208531291840998	34.2131	146.240337	5.92575	0.41486	379.672	0.783855	1.27685	21.5001	11.087	7.91068	1.65834	0.69894	1.24073
ENSG00000105509.10	HAS1	3.1734032807949	0.886779069641047	0.000345475905167186	0.0209529442974559	14.300482	29.778768	2.67816855	0.041574651754	122.1571	0	0.24498630571403	0.630023490126	2.857484	3.325224	0.0725810103842	0.10074370806202	0.0882894
ENSG00000236008.2	LINC01814	-1.50437400074294	0.42148464840185	0.000358037350840919	0.0216616974243485	0.5443374	0.2969827	0.5106151	0.5675186	0.150855	0.5221949	0.325536	0.8591906	2.3328095	1.1301166	1.5057405	1.4949359	2.4536454
ENSG00000172201.11	ID4	1.42926454468394	0.40075225917745	0.000361844128372897	0.0218386169672862	31.6211	21.9254	24.3911	10.2423	23.111	13.956	3.07031	14.8266	11.5571	15.3099	5.61936	5.00558	2.44103
ENSG00000244306.11	DUXAP10	-2.32340267595908	0.651656783050605	0.000363332320573621	0.0218750809552171	1.447505155	0.8186639	1.322372	2.148888	6.128982	0.53264	12.3480634011634	1.64842	50.73642	11.008376	8.341231	1.826078	21.20908
ENSG00000130522.5	JUND	1.29584349749495	0.363748542852878	0.000367381031953921	0.022065154455582	182.528	238.692146	150.008168	105.395992	354.28423	50.6727	64.2371	99.693069	66.1168	100.518	79.0387	67.4287	64.9065
ENSG00000163285.7	GABRG1	3.2038166738911	0.899768818956486	0.000369852063807507	0.0221597804332125	0.00763213	0.0589745	0.0695676	0.0119109	0.0286903	0	0	0	0	0	0	0	0
ENSG00000116285.12	ERRFI1	2.1764305036406	0.611659205520852	0.0003733475192163	0.0223151796207907	102.93378	636.92437	221.35633	20.962311	258.168753	27.582875	15.77813	95.002875	31.62842	71.191785	36.210889	40.901334	13.32744
ENSG00000197183.14	NOL4L	-1.23606063728632	0.347641943574616	0.000377179605996979	0.0224459048136841	11.82838	5.0005621	7.1948944	11.153835	8.9598232	6.0129307	25.7698395	10.9182193	21.19952	18.852093	10.9620813	40.3527728	25.248331
ENSG00000198574.5	SH2D1B	-2.1758244007485	0.611970712706843	0.000377348814002528	0.0224459048136841	0.2630224	0.125424	0.131513	0.101284	0.223293	0.187634	0.802329	0.191824	0.249	0.356998	0.333964	1.26706	3.599796
ENSG00000138802.11	SEC24B	0.551515066491631	0.155166773421159	0.000378932738882927	0.0224860686418658	11.591227	12.916701	12.468665	7.101158	10.83286	10.86662	5.04733	10.927441	9.180639	8.792247	8.037188	7.921377	7.761825
ENSG00000124343.13	XG	2.58770684192953	0.728789877089095	0.000384222863771887	0.0227454420192233	0.2140589	1.067471	0.0722955	0.670313	4.850093	8.800811	0.0375343	0.413555	0.798871	0.4967793	0.319894	0.1555233	0.2335866
ENSG00000099992.15	TBC1D10A	0.830401942147985	0.233918638152956	0.000385288853637887	0.0227541114159177	15.827877	28.546542	24.317523	23.84777796616	27.0223814295	33.4827568676	14.379562	20.4842033028	14.2465509	15.617017	14.81493	21.213861215479	10.992438
ENSG00000166912.16	MTMR10	0.955982215755217	0.269571254028733	0.000390671943734192	0.0227999463389212	14.1856396	14.038211	17.4266102	11.977666	15.5631143	22.9739722	10.6175675	12.6899214	8.7347813	8.4077869	9.511924	5.336669	6.4824347
ENSG00000122515.14	ZMIZ2	-0.84768671407759	0.238954844039564	0.000388940322460862	0.0227999463389212	53.84972788117	32.80937643005	41.323646	55.62670249	27.9338958093696	49.3630835182487	66.0329138	66.324696213	134.145205368062	86.1151922923	59.858751639	100.07194	99.1452071
ENSG00000106993.11	CDC37L1	1.23471549116516	0.347967142297439	0.000387626156626885	0.0227999463389212	11.376833	21.134065	16.912935	6.497337	17.62797	7.84187	3.42286	11.851947	4.092568	5.303819	8.45971	5.944879	4.2492131
ENSG00000187479.6	C11orf96	2.55570258526725	0.720616416386022	0.00039030977660324	0.0227999463389212	549.63829	1737.06668	651.12472	25.2885	538.3984	9.40177	19.1	164.537019	62.938286	159.623219	86.686013	20.7607	13.050395
ENSG00000221944.7	TIGD1	-1.26008884655829	0.355226385825445	0.000389224887166113	0.0227999463389212	1.98961	1.65348	1.28246	2.90499	0.785879	1.85949	4.52117	2.13952	4.53174	5.23964	3.3909	7.52943	6.03874
ENSG00000270106.6	TSNAX-DISC1	-2.12538888531309	0.599610246554279	0.000393183430959643	0.0228053684547165	0	0.0206655	0	0.0164524	0.0228428	0.0238374	0.0344717	0.1256968	0.1302556	0.0660516191434	0.05315940423337	0.1511175	0.097953
ENSG00000151247.12	EIF4E	0.953846639001646	0.269094772903501	0.000393135559349942	0.0228053684547165	39.536958	71.4261210028268	35.929289	23.640297	66.126283	53.041168631	16.602797	34.669342	36.77817	28.859896	24.270924	31.05483	22.174264
ENSG00000232679.1	LINC01705	-3.10776944457603	0.8768147887655	0.000393529696106848	0.0228053684547165	0	0	0	0	0	0.221099	0	1.64566	7.09661	0.845775	0.756981	0.133279	0.442246
ENSG00000146963.17	LUC7L2	0.578618218373099	0.163331019368745	0.000396187084763854	0.0229057229263588	66.516849	70.14019	67.306188	49.4761278	47.183525	51.509313	28.04944	64.093353575401	56.323635	36.699887	40.276969	47.293265	32.18141
ENSG00000127831.10	VIL1	-2.88991993157689	0.816188578857768	0.000398991030089598	0.0229605419524816	0.889494	0.2216944	0	10.3612780260007	0.344276	1.1761828	27.78508	4.617075	114.36835	31.576297	4.622649	62.79927	50.06468
ENSG00000229754.1	CXCR2P1	-2.50093112582499	0.706266232561896	0.000398522897826471	0.0229605419524816	0.785597	0.253027	0.110546	0.23838	0.161195	0.567801	0.137752	0.687968	0.497326	3.79053	0.416127	5.4216	10.8389
ENSG00000170743.16	SYT9	2.28168123906137	0.645179548730128	0.00040545754356041	0.0232246456375054	0.5998837	0.1790474	0.2048072	0.0394381	0.06326702	0.0837224	0	0.0497875	0.0323096	0.0438914	0.0481917	0	0.0539997
ENSG00000164530.14	PI16	2.83871733140759	0.80267919346308	0.000405385493259069	0.0232246456375054	115.9347	198.450784	68.171316	3.706708	279.19664	3.983949	0.1487768	48.16475	1.818	3.79403	7.48861	0.728921	3.58469
ENSG00000197622.12	CDC42SE1	0.744662798050894	0.21068292190408	0.000408518008218998	0.0233459078830926	81.2405652	87.79007	59.181943	44.4093147	73.398984	91.674595	30.243849	61.25559	60.09343	55.7800505	38.67835	39.935646	49.7293033
ENSG00000121671.11	CRY2	1.170103832593	0.33112137050018	0.000409691141949027	0.0233590030127389	31.2114	22.297376	26.526664	12.661144	38.404079	6.967863	7.369737	16.627455	11.809392	10.301432	11.870409	8.824311	8.827079
ENSG00000163347.5	CLDN1	-2.34373140674386	0.663362790194348	0.000410706938514087	0.0233630878012209	3.50772	1.686523	0.822376	1.18326	0.949258	16.277325	24.31255	4.1039	41.36833	15.6156	16.505123	93.58951	29.19837
ENSG00000169894.17	MUC3A	-2.79513620607914	0.79229463046708	0.000418870407325158	0.023528801370069	0.7065	0.2176979	0.3557538	6.84754	0.9467251	11.64561	135.9951	1.664928	53.41992	78.6704575	2.260274	67.6815323	11.702309
ENSG00000196417.12	ZNF765	-1.17689896630797	0.333559372311802	0.000418231075389181	0.023528801370069	3.236516	2.093051	2.237546	2.2120202	1.7023946	2.340952	10.770145	3.4447906	6.03491	4.652311	3.980879	6.000749	3.88338
ENSG00000203812.2	HIST2H2AA3	-1.44083914148183	0.40824013056836	0.000416516863984818	0.023528801370069	19.2139	30.5782	22.5415	13.313	15.6212	31.8871	57.3462	25.7926	81.1615	154.327	28.5829	106.788	44.9179
ENSG00000121594.11	CD80	-2.09911474519431	0.595052492759967	0.000419325172931923	0.023528801370069	0.160416	0.2732938	0.228724	0.513955	0.3537309	0.720389	0.24762	0.883557	1.2343	4.810707	0.5206089	4.219337	4.151544
ENSG00000283440.1	LINC01260	-1.83585157612093	0.520037336449855	0.00041519804263557	0.023528801370069	0.694486	0.303425	0.318152	0.53839	0.448376	0.496546	0.29697	1.11843	3.46608	1.37891	0.911963	2.30049	5.39734
ENSG00000134532.16	SOX5	1.69916733518862	0.481605240463208	0.000418501846681126	0.023528801370069	3.1843166	5.249383	2.0659188	1.39914440674499	1.8798561	0.4174159	0.4749368	1.2548636	1.332154	0.634367	0.6824059	0.2019609	0.5277385
ENSG00000204866.8	IGFL2	-2.77038041377927	0.786428977052157	0.000427119155114936	0.0238730447528244	0.1964146	0	0.0592172	0.153097	0	0.196416	0	0.2438893	3.451791	2.8408064	0.224413	0.735923	1.0954568
ENSG00000163815.5	CLEC3B	2.49326068190944	0.707796616058129	0.00042738972824818	0.0238730447528244	45.6723	208.489	30.9554	41.6462	494.193156	19.3524	8.45507	88.180187	14.3767	10.5069	14.0186	4.2208	3.60228
ENSG00000260740.2	AC026471.3	-2.59716790406591	0.737431392314421	0.000428447580185311	0.0238782328191115	0	0.210488	0.404992	0.284263	0	0.317466	1.10896	0	0.384602	4.69894	2.37594	3.24574	3.14203
ENSG00000272913.1	AC009237.14	-1.2689203450328	0.36054477278833	0.000432437816293657	0.0240464578970484	2.31679	0.384585	1.07341	1.683	1.01314	1.53412	3.69199	1.8744	5.91379	2.7418	2.99204	4.63521	3.47961
ENSG00000117036.11	ETV3	1.19219023042289	0.338831482811921	0.000433937541385677	0.0240757499138758	12.535101	17.0085	9.324833	5.7942805	26.601012	18.378165	6.982345	6.552158	8.878708	8.679778	4.703247	9.249002	4.574725
ENSG00000174944.8	P2RY14	2.09344001198852	0.595131783820308	0.000435455970763512	0.0241059463009913	29.763	28.24046	19.36016	7.138947	2.36488	2.24423	2.6368496	1.7981	1.3214107	7.157043	4.781834	0.697852	2.14864
ENSG00000234160.1	AL513165.1	1.78937243234854	0.508988538132706	0.00043885133482513	0.0241216418756337	6.216	27.1261	8.35896	3.74782	21.9633	5.06091	2.29901	6.19435	6.10179	1.68138	3.50302	2.33399	2.68924
ENSG00000241158.6	ADAMTS9-AS1	2.63546208167123	0.749760993135175	0.000439638734528624	0.0241216418756337	13.677099	22.4052725178	7.1078267	0.3621181	35.119548	1.1699921	0.4413757	6.3712331	1.550961368	1.5032163	0.3178606	0.722488	0.0626362
ENSG00000225329.3	LHFPL3-AS2	-2.4835548422028	0.706533292895807	0.000439542357122441	0.0241216418756337	0.1002905	0.0892846	0	0.598307	0.1514483	0.1586704	3.50277	0.464198	0.2145833	3.53407	0.483519	0.989415	2.208726
ENSG00000262904.1	TMPOP2	-2.74154544428744	0.779643880304837	0.000437429353733617	0.0241216418756337	0	0	0.0509017	0	0	0.0396882	0.198045	0.148505	0.0964571	0.0872679	0.13681	0.238144	0.401694
ENSG00000112877.7	CEP72	-1.5361802561028	0.437569841602692	0.000446913817326668	0.0244125439508794	1.583108	1.382652	1.6590279	4.264078	0.892925	2.36377	3.981143	2.983124	15.54928	4.866112	4.825445	9.98496	8.759139
ENSG00000181634.7	TNFSF15	-1.72605286122242	0.491638837433846	0.000446735669616236	0.0244125439508794	0.610115	1.1981026	0.502178	0.894723	0.444131	1.4388968	3.375334	0.8554524	4.133002	8.876165	1.0532407	3.594225	2.533885
ENSG00000131747.14	TOP2A	-2.23084131670334	0.6358905740115	0.000451123062623864	0.0245881942392676	5.842083	2.026203	3.24305	25.324157	1.85962	20.96649	110.94875	8.408778	40.7472	50.62433	72.20558	70.91765	95.88044
ENSG00000118596.11	SLC16A7	1.78773028007362	0.509676138166045	0.000452200859946545	0.0245927698447852	1.29367	5.928557	2.277046	0.815061	11.9163128	3.7246429	0.695424	1.489497	1.197574	1.8624794	1.6878441	0.8997068	1.097951
ENSG00000064205.10	WISP2	2.96138172942128	0.844692889501196	0.000455120953021421	0.0246972982072699	6.486145	27.763429	2.401257	0.3194584	150.711525	1.3673244	0.1172449	10.89295	1.803358	0.2472335	0.190062	0.5993896	0.7656669
ENSG00000099625.13	CBARP	2.45205991817516	0.699606555744186	0.000456756992306122	0.024731841957582	19.7585273444	15.4251607	1.1474752	0.140621126	7.326674	1.376201	0.2704383	1.566189	1.1743992	2.7975619	0.949013	0.2901462	0.3054451
ENSG00000267575.6	AC006504.5	-1.33367723545957	0.380632677104304	0.000458595216610217	0.0247771585917463	3.807372	2.193022	1.2853829	3.0066074	2.5834383	4.1107997	11.268049	3.695002	6.730924	6.181205	5.501519	14.0403515658	8.541211
ENSG00000245614.3	DDX11-AS1	-1.83512591174667	0.524309565858358	0.000465116929416585	0.0248824779987605	0.137236	0.1386488	0.166875	0.13321436	0.1574968	0.2730162	0.562729	0.16904618	0.324518	0.4465688	1.176085	1.799862	0.900954
ENSG00000234065.2	MTND4P26	-2.18670823790537	0.624438021777653	0.00046198426220921	0.0248824779987605	0.0867205	0.0419203	0.131866	0	0	0.0685129	0.136843	0.170981	0.291469	0.263756	0.118151	0.369844	0.589969
ENSG00000140450.8	ARRDC4	1.476835251051	0.42181683697449	0.000463291156385335	0.0248824779987605	30.5021	41.0641	22.2192	9.30761	47.0926	5.6548	7.81477	15.5966	12.3311	6.17613	9.13326	9.74704	6.78224
ENSG00000229816.1	DDX50P1	-1.90006177217513	0.542902704543567	0.000465572330306168	0.0248824779987605	0.0686998	0.0221002	0.0463258	0.107097	0.0214501	0.018057	0.16308	0.112711	0.175484	0.258501	0.103829	0.281478	0.403152
ENSG00000171503.11	ETFDH	1.04654210640708	0.298944273355659	0.000463875496753191	0.0248824779987605	25.25826	27.747156	32.622071	26.68817	37.158265	25.780887	14.471131	25.85202	12.099587	12.99144572318	23.19503	9.496287	8.259731
ENSG00000217275.2	AL031777.1	-3.00650641403138	0.859888069652416	0.000471594022812486	0.0250644215163174	0	0	0.170657	0.392549	0	0.134079	1.72019	0.16603	0	10.9696	0.610758	10.1965	0.668013
ENSG00000100815.12	TRIP11	0.536456370231697	0.153441838831944	0.00047201537387771	0.0250644215163174	4.55375	4.770235	5.97147	4.279531	3.857148	5.427209	2.399112	4.213169	3.966802	3.825036	4.511901	3.99155	2.78556
ENSG00000136603.13	SKIL	-1.02872863342343	0.294174551426089	0.000470520470757813	0.0250644215163174	8.289266	7.003715	7.1173169	10.2975143	9.453443	7.989418	13.3457717	10.4458545	21.6287274	36.225565	11.532394	26.9769659	16.729649
ENSG00000130164.13	LDLR	1.60637730512971	0.459586267991332	0.000473585468839891	0.0250939452386362	40.516573	225.3184893	106.697796	46.85006226	176.913694	70.013112	31.88378	38.2846554	27.5356189	39.121606	20.046057	94.2816498	19.1355553
ENSG00000060718.21	COL11A1	-2.94863382148603	0.843913469771336	0.0004758406844416	0.0251285918286775	0.77307800622933	0.2034510471895	0.8716599675853	0.0259848	0.5600199	0	0.0677383	0.39598230163625	48.621371	8.6417977	0.9366499234324	2.4892892	1.9388373
ENSG00000284669.1	AC092053.3	1.97406340391799	0.565025599562572	0.000476270340175783	0.0251285918286775	1.26301	1.32169	2.65446	0.123192	1.11736	0.331602	0.0498323	0.383535	0.52461	0.420369	0.0573358	0.297772	0.194028
ENSG00000100227.17	POLDIP3	0.422411811828895	0.120964947088168	0.000479385358700272	0.0252391291511452	33.63150884	32.238944909167	28.5948380247	22.5512060027101	32.3968466279	27.9079008015315	19.642252411	27.0608460219543	28.92905894803	20.33205852164	26.346355014832	26.0777840620385	20.713892344
ENSG00000213859.5	KCTD11	0.789331882448659	0.226077310188455	0.000480452051828979	0.0252415839119068	10.315759	15.68119	9.59929	8.305965	11.942461	15.615516	4.790046	9.526117	6.327139	7.654422	9.328232	8.506869	7.205
ENSG00000204220.11	PFDN6	-0.903819815102159	0.259137911592583	0.000487022016649864	0.0254785619492619	61.255176	57.192977	55.2828	52.805345	53.12677	73.40976	77.358801	62.407889	113.13099	171.46541	116.560278	205.261872	123.05572
ENSG00000154920.14	EME1	-1.91975990586479	0.550357174446019	0.000486270933656342	0.0254785619492619	0.900713	0.3508264	0.325445335172	2.78187100639796	0.57906130375324	2.907553	6.06251400666155	2.1405615	5.096874	4.743543013	6.814899	9.71634	10.36948
ENSG00000185650.9	ZFP36L1	1.29399212829872	0.371176740268558	0.000489955406646691	0.0255779462815873	487.19469	393.831489	391.489502	48.995452	262.382773	215.890489	56.995994	130.05244	182.157385	127.412986	125.237363	157.543307	114.555359
ENSG00000153130.17	SCOC	0.5538355778583	0.158929434643909	0.000492524890153331	0.0256579545407246	46.228351	43.711353	45.310156	27.9562301	31.3258158	42.18198	18.010786	37.69871	28.839529	29.734523	35.055654	28.814086	27.603805
ENSG00000076382.16	SPAG5	-1.81134450516306	0.520123585302742	0.000496704858194459	0.0258213481429031	4.910265	6.47402573824	2.6955577	13.317149	8.010255	11.665146	34.87342592	5.133218	25.183093	29.981343	24.604599	37.867105	78.71744
ENSG00000230838.1	LINC01614	-3.19986183257142	0.919020362388859	0.000498021667873419	0.0258355265650477	0	0	0	0	0	0	0	2.10432	5.61957	0.390367	0	0.321954	0.626256
ENSG00000171617.13	ENC1	-1.81942455380198	0.523071166096474	0.00050451084444239	0.0261174076270438	4.403953	3.94416	2.092706	19.31851	5.1341042	6.4856638	23.821911	11.686479	56.630794	28.028141	20.8218954	75.371331	13.9379885
ENSG00000131459.12	GFPT2	2.75254530721499	0.79174235692841	0.000507877417829874	0.0262367989649274	15.49941	96.848873	18.801412	1.26061	251.615644	0.794109	0.5782725	16.494258	11.411615	6.740925	5.251925	0.573982	2.79783
ENSG00000169282.17	KCNAB1	1.81809271528879	0.523268464049619	0.000511819353864444	0.0263853539820327	2.936964	1.06032515078	4.9503	0.630467	7.19487800208819	0.7756086	0.638228	1.641298	0.8115820133379	0.830467	0.85759	0.42481828336	0.389892
ENSG00000147655.10	RSPO2	2.82478903947998	0.813803097603009	0.000518337793329108	0.0266658392846752	34.81722	28.045326	6.404993	2.2284522	0	1.581481	0.0835776	0.5841981	0.2950777	3.35901	1.297026	0.1540382	0.51546
ENSG00000167323.11	STIM1	0.840751159269779	0.242309762711813	0.000520968137730498	0.026745553045936	55.1997062	35.9022201	41.59211	18.9310532	48.338583	48.8662157	14.1729419	36.874486	25.1290073	19.725939	29.765695	29.027724	21.7712686
ENSG00000135472.8	FAIM2	1.91364553937223	0.551681415083715	0.000522883554233927	0.0267883096263324	4.5894216	5.021403	4.959602	1.825064	17.595298	0.9069889	0.872584	3.1792073	2.003729	1.267514	1.95675	0.936693275	0.400423
ENSG00000127528.5	KLF2	1.53071900800302	0.441607399427422	0.000527784031594679	0.0269835038467156	66.956828	140.658	46.78556	83.00233	167.60617	32.0356	32.238	67.14821	35.41661	33.88188	14.44027	35.03118	12.29531
ENSG00000108963.17	DPH1	1.21733550005785	0.35127165727629	0.000529226514408258	0.0270014641217162	95.964405	64.379982	51.61883	25.7696364	118.56179	26.211886	28.2387004	41.119572	28.114771	26.464295	26.589869	33.389711	16.599823
ENSG00000280734.2	LINC01232	-1.49731508434052	0.432191846982799	0.000531280153121149	0.0270504678785655	1.858285	0.4570695	1.148915	3.2749246	0.942121	1.3996268	4.966488	1.6839034	6.689793	3.7982579	5.4939505	6.521696	6.086206
ENSG00000198915.11	RASGEF1A	-1.86917117441406	0.539650576905955	0.000532861019268265	0.0270752482993701	1.3085926531	1.1875959309781	0.96503105518	1.1657843468	0.46563	1.304993278	3.8646852	1.1531728741	0.7947153104	5.60901079058	1.6864931372	11.3002809	9.1580227
ENSG00000121210.15	TMEM131L	1.15586143448843	0.333938452960865	0.000537571791308591	0.0272586351965801	13.464625	16.572344	15.8185488	6.3393212	11.204139	7.5261445	1.857483	10.838392	4.717156	6.2905171	7.14314744542	4.147103544971	4.9555665
ENSG00000135824.12	RGS8	2.35623014434237	0.68112267428903	0.000541514963025657	0.0273465056327957	0.0650762	0.170618	0.112991	0.0217627	0.03819124	0.06192997	0	0.0183112	0.0089105	0.00807155	0.0506428	0.00876559	0
ENSG00000117152.13	RGS4	2.63855716349613	0.762625597565187	0.000540510613875628	0.0273465056327957	26.87277	133.882523	21.607315	1.065172	4.9791061	0.384835812	2.39088404092	4.2987299	4.392827	3.783844	7.271836	1.065494	0.331546
ENSG00000204610.12	TRIM15	-2.84548478688703	0.823604860654415	0.000550466335559227	0.0277419337544055	0.02494721	0.02410769	0.02527848	3.295581	0.07020039	1.33829	9.4964	1.743006	15.38096	14.02446	1.078217	47.648712	19.06425
ENSG00000243709.1	LEFTY1	-2.57562805781575	0.746205092554057	0.000557199706653611	0.0278543570528154	0.551024	0.24323	0.341496	0.0824908	0.101533	0.0556436	6.526738	0.574833	0.392246	0.932892	4.64929	0.266873	0.0612912
ENSG00000107829.13	FBXW4	0.930744954888441	0.269635390908946	0.000556726304427601	0.0278543570528154	72.840403	60.185884	79.80008	29.388505	31.096713	36.905775	18.531176	40.378861	28.00734	24.500357	39.52815	34.110959	17.535609
ENSG00000118733.16	OLFM3	2.84080911611207	0.822914794501109	0.000556179022654924	0.0278543570528154	0.732743	0.127146	0.449951	0.0635173	0	0.099643	0	0.0803735	0	0.0219465	0.0458893	0	0
ENSG00000104490.17	NCALD	1.94980917061476	0.564712429449052	0.00055490910114754	0.0278543570528154	46.4553208	54.86662209	41.194746	6.457133	14.8479928	3.8883013149086	2.181654	16.494929	6.0988007	5.6030694	11.043836	2.4947473	2.96344
ENSG00000178568.14	ERBB4	2.66802434958606	0.774247034992491	0.000569034480829536	0.0281413869367286	0.1315002	0.659256448	0.0766124	0.026398964	0.051686226	0.01987856	0.0241428	0.024984937462	0.00837592	0.003671144	0.0457742	0	0
ENSG00000273373.1	AL355488.1	-1.34141569216099	0.38919117974776	0.000567529879234774	0.0281413869367286	3.56537	1.00778	1.84444	3.09274	0.978996	3.33367	3.95065	3.77384	6.16536	5.41856	5.90657	10.0103	11.2898
ENSG00000157445.14	CACNA2D3	2.00923558536623	0.58312857332108	0.000569764997183311	0.0281413869367286	5.951786	5.4788327316172	4.729543	0.8506773	1.1545594	1.7129286	0.4650407	1.813207	0.660243	0.23989609	1.599865	0.2058558	0.1433252
ENSG00000136267.13	DGKB	2.80760878055922	0.814806980134467	0.000569508931074296	0.0281413869367286	2.1885662	4.9027067	1.226573	0.0370208	0.11809828	0.103759	0.0229831	0.3183908	0.05584904	0.242257	0.1448936	0.00730659	0
ENSG00000277128.2	AL589743.4	-2.45734307196673	0.712776845297421	0.000565668486147667	0.0281413869367286	0.0124615	0	0.2643856	0.1014874	0	0.039268	0.3680163	0.0736415	1.642842	0.543253	0.6856674	0.4399203	0.26397
ENSG00000240338.6	AC009078.2	2.10640148298491	0.611240774343288	0.00056872384262122	0.0281413869367286	0.470348	0.637981	0.846159	0.1843432	0.597556	0.8243	0.159431	0	0.194727	0.309675	0	0.2443918	0
ENSG00000120440.14	TTLL2	-1.84575492337938	0.535888420736341	0.000572562032781235	0.02821069873013	0.115997	0	0.205704	0.1882195	0	0.0915209	0.251697	0.457214	0.9182385	0.5038133	0.237016	0.740449	0.301917
ENSG00000104921.14	FCER2	2.290688236672	0.665252923372983	0.000574588488987089	0.02821069873013	0.644422	1.738445	0.119202	4.032475	6.4593524603	3.139516035126	0.3711504	0.660109	0.8103719	0.4382358	0.284828	0.028429	0.76943
ENSG00000266088.5	AC004585.1	-2.20633738296022	0.640736256194729	0.000574362270351961	0.02821069873013	0.370415	0.17929245	0.0939089	0.7939612	0.1729966544	0.537428	0.729915	0.487144	1.692952	1.529741	1.17737	10.69115	1.53052
ENSG00000166135.13	HIF1AN	0.76160933726117	0.221411335819957	0.000582157567666441	0.0283802226838921	12.448099	10.00707	10.94596	5.386044	5.538895	10.687222	3.776042	8.853423	6.229475	5.207314	6.264873	6.595729	4.271183
ENSG00000284966.2	AL138689.2	-1.29522926504001	0.376566689869774	0.000582628940125973	0.0283802226838921	0.389126	0.3760747	0.8753567	0.2304323	0.1695019	0.3057547	1.1185313	0.7368103	2.029424	1.0974109	0.8837356	1.071169	0.5542814
ENSG00000177807.9	KCNJ10	-2.65839676203514	0.772704078545745	0.00058089490080212	0.0283802226838921	0.102142	0.0987698	0.463296	0.33417092	0.04776026	0.4401165	0.24836907	0.0323561	0.9755579	1.3303331	0.3848351	3.2296100859	13.8221250034392
ENSG00000162654.8	GBP4	-2.06638612918378	0.600567090451974	0.000580158112935213	0.0283802226838921	15.56927	4.96548	4.934403	9.03959	10.46183	15.86118	12.55995	9.80122	17.35554	56.7942	15.35493	214.5693	84.9012
ENSG00000152147.10	GEMIN6	-0.798111727400508	0.232120118031226	0.000585256540251923	0.0284411429360373	4.70378	2.91729	4.95999	4.50498	6.13873	4.95292	5.51005	8.04617	12.31745	6.44844	10.89258	10.2629	10.43274
ENSG00000109332.19	UBE2D3	0.93711262794032	0.272738800230788	0.00059051392195286	0.0284411429360373	164.078518001484	339.959888	171.04803280198	111.611331428058	289.679702097997	156.7649476	72.589978	143.58373	139.454219	128.458593085259	100.015568748	118.441671733597	124.62702365
ENSG00000251026.1	LINC02163	-3.07076692041199	0.893584802262006	0.000589373048674768	0.0284411429360373	0	0	0	0	0	0	0.423536	0.132728	2.20284	0.350823	0.244228	0	0.642241
ENSG00000122490.18	PQLC1	0.897473383590343	0.261162587640967	0.000589381056728213	0.0284411429360373	32.408523	52.080167	30.38149	17.8146584	44.844234	24.833758	13.7449364	28.902053	17.932054	19.9563016	20.3012494	16.9928034	19.8141705032034
ENSG00000163629.12	PTPN13	1.90382386903389	0.554111402863574	0.000590775812047815	0.0284411429360373	4.049947728	3.20082639844	4.12858592001	1.53608518589423	3.9037698	15.242649	0.35092192178	3.925549194352	1.5129574230742	1.2670008	2.01310283	0.60651464411	0.4341662
ENSG00000143867.6	OSR1	2.50971397516208	0.730223279478377	0.000588384287116807	0.0284411429360373	14.654032	142.62615	7.150811	2.728435	56.577225	1.1333778	3.938851	15.358784	5.18452	3.619979	3.724868	2.758279	0.7155298
ENSG00000279622.2	AC025280.2	2.25956112568017	0.658084625342863	0.000595750148910744	0.028624927057857	0.332826	0.998519	0.567863	0.109347	0.213771	0.0276125	0.0691121	0.1553	0.0335947	0.0152121	0.079528	0.0992221	0.0140359
ENSG00000117143.13	UAP1	1.9576072071245	0.570476880305838	0.000600191870162232	0.0287824570293884	47.81476	371.19735	45.232673	36.979291	359.44596	34.270083	50.24307	31.71053	28.302459	38.551704	31.55175	47.208181	24.79578
ENSG00000264019.1	AC018521.2	-1.8344293067041	0.534751131174249	0.000602613043169367	0.0288426687683288	0.703599	1.77571	7.42335e-09	2.90704	3.27831	2.56286	8.21802	2.62322	7.75754	12.2493	8.641568	14.55677	7.22369
ENSG00000270977.1	AC015849.5	-2.54422891996253	0.742077829735392	0.000606881097814046	0.0289908740644953	0	0	0.00965345	0.0223116	0	0.0450386	0.2450012	0.0281597	0.0274061	0.0827519	0.0865338	0.161766	0.376837
ENSG00000103196.11	CRISPLD2	2.10355266743832	0.613928430973945	0.00061168188319426	0.0291639078991175	189.2010629	417.746095	184.173175	33.2325144	93.030333	7.5953595	14.958635	59.9866119	36.9277278	35.5248434	55.6890825	12.5101915	8.2285689
ENSG00000228709.1	LINC02575	-2.22037298988241	0.64825734881541	0.000614479848536936	0.0292130195575226	1.41139	0.204806	0.501123	0.220198	0.1317	0.223561	2.05969	0.626614	2.57894	3.00682	1.47479	9.87027	0.16924
ENSG00000196812.4	ZSCAN16	-0.945965276934117	0.276203991592199	0.000615073072922582	0.0292130195575226	4.22756	3.0542	3.34218	4.34492	1.83455	3.90684	6.46742	4.78639	9.66936	5.65254	5.90812	12.7948	7.16545
ENSG00000283341.1	AC068205.2	-1.40920846172036	0.412462021997037	0.000634136125010045	0.0299459893384992	0.805551	0.326446	0.526606	0.466334	0.0974803	0.512417	0.799651	0.640097	1.62042	1.06084	0.993279	2.031916	2.49764
ENSG00000151929.9	BAG3	1.80564302554053	0.528492315496707	0.000634100542378127	0.0299459893384992	92.52578	219.0504	140.97213	10.512779	162.7975	54.25553	11.807803	66.90362	23.97309	36.83435	45.24233	32.75731	9.221504
ENSG00000174015.9	SPERT	-3.00835365680652	0.880410038282004	0.000633172460536765	0.0299459893384992	0	0	0	0	0	0.0280786	0.140312	0.141445	0.88826344	0.13384	0.314782	0	0.0308282
ENSG00000277452.1	RN7SL473P	2.20376779413404	0.645146846445683	0.000635677226092149	0.0299615865898099	3.99872	9.55148	6.38954	2.78428	19.5851	1.80671	0.355317	5.31055	1.74284	0.780647	0.406827	0.433865	1.42591
ENSG00000119900.8	OGFRL1	1.28818582703968	0.37718051565703	0.000637110467106632	0.0299720503964897	6.0285401	10.148969	8.189987	3.153105	8.062467	19.721021	1.851599	6.276721	5.015279	4.959595	3.32012	5.063736	2.794733
ENSG00000157766.16	ACAN	-2.46529393435346	0.722065656749152	0.000639639509089029	0.0300004511395955	0.640618	0.6468407	0.076581000864512	0.015913203	0.8040297	0.1539746	0.5052768	3.3710346	8.3965531	9.75839024106718	0.2030507591	3.4779945	0.4525687
ENSG00000273102.1	AP000569.1	-2.87307636496385	0.841554411717524	0.000640138945310423	0.0300004511395955	0	0	0	0.100169	0	0	0.40516	0.380832	0.619571	0.111847	0.116801	0.164742	1.19643
ENSG00000011677.12	GABRA3	3.00194431083009	0.879437755518054	0.000641385659573063	0.0300020569870235	0.0143101	0.0648953	0.115965	0	0.0268765	0.428459	0	0	0.0137196	0	0	0	1.52522
ENSG00000179914.4	ITLN1	-3.02190310096968	0.88562726850876	0.000644499618719138	0.030090835972085	0.255615	0.0494353	0	2.55265	3.82469	0.727531	112.179675	1.76433	81.6754	95.78639	0.0928779	0.705005	1.49274
ENSG00000132031.12	MATN3	-1.83903212955011	0.539703315819979	0.000655639884251596	0.0303903597564133	1.2975	0.146265	0.954058	0.337466	0.66959	0.542564	0.797413	1.926044	9.4269	4.308253	2.41698	1.101219	0.910595
ENSG00000237643.1	AL365226.2	-2.73681485858259	0.802899667404177	0.000652819314593822	0.0303903597564133	0.753816	0	0	2.54943	0	2.22398	0.794228	1.74467	44.4183	361.945	30.4769	10.7432	9.00135
ENSG00000133422.12	MORC2	-0.572918969827446	0.168139180080174	0.000655827525153554	0.0303903597564133	21.20707	10.623401	16.38917	12.725482	14.924934	12.387322	17.090668	18.45816	30.28782	25.604113	23.142026	34.46303	19.179737
ENSG00000167779.8	IGFBP6	2.09276118824952	0.613996645632788	0.000653391717871108	0.0303903597564133	120.308152	430.768288	85.484356	25.062063	443.821301	32.861726	7.98194	98.80939	42.72422	35.737194	43.831034	56.817712	12.23685
ENSG00000127191.17	TRAF2	-1.1583791259612	0.340109019185528	0.000659450388152652	0.0304442161470846	11.8273	5.672402	6.507278	11.2681914	6.524338	11.30803	18.873977	11.094515	18.689763	36.9288447	13.58155	22.964189	32.206146
ENSG00000171174.14	RBKS	2.07841449830304	0.610235064708985	0.000659404354816379	0.0304442161470846	25.7363834	14.6535772	1.69465	1.7772682	46.9191166	3.331068	2.909576	2.5374065	3.705684	3.0563752	1.90749	6.932519	2.332097
ENSG00000238133.6	MAP3K20-AS1	-2.24971463898335	0.66083067962677	0.000663159403329086	0.0304944638719018	0.130749	1.04112	0.335297	0.124952	0.2267748	0.186428	3.0495	0.365201	1.546065	4.335769	5.083324	1.54589	0.137765
ENSG00000160408.14	ST6GALNAC6	1.66855338074309	0.490042503606266	0.000661844980411387	0.0304944638719018	92.817862	139.1666207996	85.5092983	21.283361	149.983086	19.275377	10.57668	61.309476	23.4693048	29.605876	33.514114	13.936917	16.4611494066591
ENSG00000136231.13	IGF2BP3	-2.39998764931816	0.705063588948489	0.000664235846714693	0.0304944638719018	0.25368584724	0.2719872	0.507145353	0.21791141498	0.0681054	1.445218	1.2340212	1.4118013	1.0580584	5.243363	0.1300305	13.017703	5.8064166
ENSG00000189366.9	ALG1L	-1.97137213746028	0.57932790220663	0.000666842753174975	0.030522738397326	1.17456	1.5454	1.29672	1.059023	0.219265	0.178555	12.1108	1.514	2.1777	5.20219	2.45768	4.62556	1.77587
ENSG00000277224.2	HIST1H2BF	-2.69043437911497	0.790721586804681	0.000667710635112691	0.030522738397326	0.252279	0	0.102315	0.0393647	0	0.358996	0.796155	0	1.0179	3.3767	0.320828	3.30301	2.7452
ENSG00000168875.2	SOX14	-3.13634229661297	0.921867666203436	0.000668552200903241	0.030522738397326	0	0	0	0	0	0.0213717	0	0.0266951	1.87148	0.188263	4.30546	0	0.260388
ENSG00000148154.9	UGCG	1.08433130206667	0.318935920325838	0.000674251381584365	0.0307262438992728	38.153425	76.974402	46.817385	21.1750778	60.357714	31.022341	16.211614	21.366562	20.417756	37.93803	14.687808	34.259712	19.475643
ENSG00000126453.9	BCL2L12	-1.18215630578048	0.348003781755302	0.000681379394967351	0.0309939947214469	15.726410648	11.83932599421	14.657535129	19.285856	13.9443	17.1508284012829	42.827022000584	15.610241	35.262678460813	35.865319	20.912102	71.176111	53.676473663684
ENSG00000178726.6	THBD	2.12874298872931	0.626958741495946	0.000685414683321869	0.0311203419060544	17.4338	29.6588	11.2258	11.8178	152.477	42.2674	3.11458	25.7187	17.4895	8.84158	7.76274	3.54164	1.628
ENSG00000205362.11	MT1A	2.55426375350853	0.752602306377229	0.000689025801150057	0.0312270026546853	4.79684	66.6947	54.5673	4.926	152.585	1.01579	5.78596	16.779	2.20707	2.20542	2.53271	11.0405	0.401974
ENSG00000223549.1	MTND5P28	-1.88863096776779	0.556716807626134	0.000692719203813952	0.0313369957922783	0.144204	0.0348472	0.109617	0	0.0675426	0.0284626	0.256003	0.17766	0.242237	0.469829	0.163709	0.136516	0.346358
ENSG00000259357.2	AL590133.2	-1.87173924996554	0.551954114024492	0.000696091741162594	0.0313767597275396	4.3201300335495	7.01172	1.15205	14.32012	5.38002	3.09426	23.86536	14.44227	13.80513	69.0808	24.1702	8.78622	39.26877
ENSG00000257743.8	MGAM2	-2.93999202969605	0.86706708587653	0.000697062533321555	0.0313767597275396	0.01402257	0	0	0.209716	0.0123222	0.474829	6.2274588	0.03560878	4.9889338	2.2558556	0.166634	7.2897336	0.969018
ENSG00000178828.6	RNF186	-2.91868997769675	0.860818551867497	0.000697402216615347	0.0313767597275396	0.0478611	0	0	0.597453	0	0.151312	1.17059	0.0471885	11.4865	1.37265	0.0869484	8.6209	2.91071
ENSG00000013293.5	SLC7A14	3.01860540316402	0.890685767575795	0.000701275241514034	0.0314937492763426	0.644526	0.176457	0.673284	0.0187911	0.0286249	0	0	0.049974	0	0.00881155	0.00921481	0	0
ENSG00000140522.11	RLBP1	2.53379663469173	0.74784163701594	0.000703668027423137	0.0315439589467129	0.593078	0.518892	1.3842142	0.1915543	0.341743	0	0	0.1213756	0.118431	0	0.111657	0.117719	0.0249963
ENSG00000174903.15	RAB1B	0.465409214689501	0.137437913610544	0.000708358676102607	0.0316968091142116	151.991	124.307	157.115	107.807	131.717	139.456	89.8553	130.118	105.335	104.686	130.802	114.232123	74.5903
ENSG00000159461.14	AMFR	0.578993411481826	0.171185119415357	0.000718907981052837	0.0319378419948877	50.291387	50.030176	51.72913	26.968406	44.074618	39.7987	27.731852	43.226094	29.833269	34.597372	32.384426	33.851063	21.537872
ENSG00000149798.4	CDC42EP2	2.05132136831428	0.606355778762153	0.000716901211969565	0.0319378419948877	24.2209	50.1707	21.74	4.9921	172.239	5.11754	7.36215	14.6018	10.7826	14.0817	9.66335	11.1296	5.76237
ENSG00000123358.19	NR4A1	2.43358761091705	0.719434382446795	0.000717926416062156	0.0319378419948877	975.4786623	203.170169168877	192.347320028557	10.7607624490744	986.067809	27.0637867082963	28.37010853555	24.7410710729865	38.690587044597	207.690461278525	9.606858423386	55.468657601907	17.2492930237936
ENSG00000187193.8	MT1X	1.91726357495774	0.566800370254582	0.000718009898518174	0.0319378419948877	187.638138	147.30516	1133.6376	120.378494	169.262167	616.96787	79.6053239	241.76597	61.679808	158.11193	43.175931	93.983238	19.569566
ENSG00000100298.15	APOBEC3H	-2.02105398197663	0.597847031365494	0.000723399431256323	0.0320797830222898	1.640802	0.459619	0.711433	1.9207806	0.699106	1.971129	0.806106	2.76199	3.482915	9.154842	2.321012	5.771412	21.613437
ENSG00000131016.16	AKAP12	2.39828657653744	0.709888037146949	0.000729086334680557	0.0322741347972636	85.34856	149.4905	57.60305	3.757978	66.91918	2.03502700533992	3.019093	18.5581	9.57013	6.031528	22.105954	1.32095600097205	1.115727268432
ENSG00000234072.1	AC074117.1	-1.08512943525848	0.321317405027245	0.000732474283957973	0.0323662074223929	6.643879	4.027311	4.50524	7.95436	5.562082	6.779719	12.270076	7.099745	19.38205	14.24369	7.341775	17.44499	21.092067
ENSG00000215784.5	FAM72D	-1.79447027899517	0.53174027588303	0.000738929823649142	0.0325932593336863	0.325449	0.0889945	0.450082	0.887184	0.366053	1.30102	2.56024	0.870622	1.09862	1.76537	3.558	3.51624	3.8028
ENSG00000177511.5	ST8SIA3	2.96879758612411	0.880004140067744	0.000741873094626847	0.0326648571646643	0.563241	0.0250354	0.1912858	0.146334	0	0	0.00340925	0.0127624	0	0.022503	0.00392218	0	0
ENSG00000100450.12	GZMH	-2.2697877209018	0.673151558164275	0.000746563873802464	0.0328130072064688	8.2322	1.883255	2.585607	10.73111	5.51318	2.863401	5.222914	6.633114	12.61977	38.05694	6.14866	29.06382	155.00515
ENSG00000138316.10	ADAMTS14	-1.5720837595695	0.466734206501525	0.000756432824470018	0.0331878195771465	1.3706581974	1.17798	0.593426	3.33793	1.352883	0.7886895822	2.249006	5.350641605	13.44956	8.02864	3.21521	2.770835	3.231791
ENSG00000213918.10	DNASE1	-1.6463076175677	0.489178620284839	0.000764181061984292	0.0332228537418252	6.537226	2.0279507	3.812828	5.5633884	2.837221	6.100052	13.550593	5.3211413	28.478776	13.580945	6.4564	7.139962	39.595121
ENSG00000143196.4	DPT	2.61830103682568	0.778085906250415	0.000765286992638528	0.0332228537418252	147.028	564.518	180.406	21.8308	492.896	29.7833	2.5252	105.321	19.0055	12.5249	45.6976	0.787782	0.685099
ENSG00000119471.14	HSDL2	0.698751602529387	0.20758073644941	0.000762203118769838	0.0332228537418252	32.50752	31.812665	29.08293	15.273745	37.640778	18.9591925672	15.656251	19.339486	24.560352	16.401829	17.302363	21.958334	13.956432
ENSG00000142961.14	MOB3C	1.12743850973626	0.33483599958016	0.000759530885480643	0.0332228537418252	20.5351200160099	27.05777	18.8435	8.61687000060433	46.16394	14.06076	9.40004	14.84852	10.53263	11.487855408	11.3088406	9.19393	10.232110105139
ENSG00000197019.4	SERTAD1	1.37983080207192	0.409950026314808	0.000763078501377658	0.0332228537418252	26.9922	43.2877	19.6616	9.91583	60.2056	14.3116	11.4157	12.8582	9.49676	17.5614	6.05638	17.151	7.61318
ENSG00000213222.3	AC093724.1	-1.69485096604188	0.503580426372939	0.000763770012832151	0.0332228537418252	0.124557	0	0.128341	0.1488	0.237033	0.456206	0.54254	0.44058	1.51601	0.82239	0.816196	0.60233	0.501809
ENSG00000021488.12	SLC7A9	-2.40292387057418	0.714566254098609	0.000771638788394866	0.0333264638073569	0.836534537	0.51650277	0.3916409679	0.551225851	0.3213490453636	0.145027	0.889961663	0.468907567	4.525338	0.448111272	0.266915	1.966146	16.577242
ENSG00000134020.7	PEBP4	2.28407991006564	0.679230628595912	0.000771714033607416	0.0333264638073569	2.651377	5.140242	0.953448	0.56395	0.85268536	0.437946	0.0570276	0.855956	0.139064	0.188599	0.656905	0	0.173364
ENSG00000255867.1	DENND5B-AS1	-2.23614142684881	0.664787814883901	0.000769073316799581	0.0333264638073569	0	0.0568389	0	0	0.21843	0.210783	0.410909	0.398859	0.223172	0.566498	0.385093	1.563206	0.676602
ENSG00000100316.15	RPL3	0.747259856866197	0.222274620941061	0.000774146986526057	0.0333732877728002	2338.129015	2714.05145	2309.741193191	1833.98674207679	1586.100883	2149.621387	728.2812515	2290.291466	1651.302957	1086.093065	1737.111888	1438.042732	1044.6327083
ENSG00000283554.1	LINC02341	-2.80748417751012	0.836122399845986	0.000785816239578972	0.0336419080421828	0	0	0	0.1614176	0	0.0638251	0.1359281	0.0794601	4.226968	0.280116	0.146338	0.3938922	0.784384
ENSG00000103175.10	WFDC1	2.09552539135515	0.624076861622694	0.000785653886467907	0.0336419080421828	168.640335	140.65642	78.342057	27.220918	5.9869848	6.541233	12.584595	17.101181	9.070239	31.510888	16.979516	5.2859774	4.2749287
ENSG00000005302.18	MSL3	-0.503348588502556	0.149893591507996	0.000784974188450368	0.0336419080421828	21.2932512431904	15.2361421382426	17.5556317350788	20.23312534	17.30450531348	17.5201789367726	22.2800204051838	28.2587961025828	33.6290469476	26.22861931521	21.0449365441371	35.96490216102	31.8728362627336
ENSG00000258813.2	AL442663.3	1.84680095178981	0.549836610780918	0.000782766809787806	0.0336419080421828	1.37158	2.86609	1.35785	0.245028	1.00974	0.15324	0.198711	0.311925	0.123325	0.447189	0.229277	0.558591	0.253515
ENSG00000186810.7	CXCR3	-2.30848945448645	0.687688341976382	0.000788263993295948	0.0336884153956964	1.83516	0.477574	0.2861474	3.60191	0.694317	2.567969	0.89106	4.14588	6.623974	11.51569	2.724407	9.503136	47.10421
ENSG00000237988.5	OR2I1P	-2.75573901359945	0.821738995848942	0.000797833295986396	0.0340385946710058	0.827289	0.164088	0.197457	3.9277	0.259722	5.15155	0.889229	0.731098	9.2536	17.4079	1.01733	88.9534	87.7335574
ENSG00000144834.13	TAGLN3	2.59655113494242	0.774735664311054	0.000803658386437606	0.0342281011573125	6.41967	0.9771576658	5.868215	1.3119404	0.104133	0.1984648	0.176843	0.205617	0	0	0.8186616	0.2147971	0.1789688
ENSG00000170961.6	HAS2	2.49283821916347	0.743957510081722	0.000805841884546048	0.0342609481552404	2.29243	10.608	1.39068	0.843141	57.193	0.416763	0.812803	1.90271	3.77463	2.77797	0.983521	0.760462	0.625874
ENSG00000137727.12	ARHGAP20	1.99569780184232	0.595674776580403	0.000807198738108917	0.0342609481552404	6.62782814121	3.136615	2.26728	0.248555000124871	3.47535	0.815275	0.286269	1.58591800021334	0.407062000086689	0.676025000086614	1.012192	0.1175427	0.191495
ENSG00000272414.5	FAM47E-STBD1	1.69917414620152	0.507536046780953	0.000814297357859306	0.03435455677678	16.103983	38.292867	15.273586	5.824376	26.201385	3.389226	2.77843	10.694488	2.84902	4.7299	9.949335	3.4615254097	3.079759
ENSG00000280441.2	FP236383.1	-1.29659062478059	0.387299172438766	0.00081463015754531	0.03435455677678	2.26332	1.91223	1.16406	2.0816	1.84657	1.91378	3.0282	2.94156	4.45846	13.933	5.99636	2.63366	4.1606
ENSG00000141338.13	ABCA8	1.95363301251294	0.583663231379758	0.000816345903606653	0.03435455677678	21.521903	14.2736073	14.6082006	13.0038531	49.0173381	4.53544586	3.9504846	13.82611	3.469651	1.7644113	7.39954865	0.712324	1.674056
ENSG00000168903.8	BTNL3	-3.00025075863715	0.896252923266474	0.000815295136055009	0.03435455677678	0.246794	0	0	0.178243	0	0.0891287	11.1537	0.0884161	4.0136	3.65183	0	0.0847847	1.61759
ENSG00000278996.1	FP671120.1	-1.29659062478059	0.387299172438765	0.000814630157545278	0.03435455677678	2.26369	1.91257	1.16247	2.08207	1.84696	1.9143	3.02884	2.94045	4.45635	13.931	5.99829	2.63451	4.16143
ENSG00000229127.1	AC007038.1	-0.965793992404699	0.288767278817287	0.000824188580471789	0.0345670278369058	0.377109	0.364413	0.382104	0.372708	0.259379	0.337088	0.872839	0.495415	0.96471	0.567752	1.00451	0.760357	0.543717
ENSG00000137285.9	TUBB2B	1.87209667333261	0.559718510002923	0.000823683410767684	0.0345670278369058	10.42769	21.893267	10.005557	3.2162255381	18.407941	7.53054	3.20241	7.85174	0.695469	0.794209	5.39823	2.523683	0.965313
ENSG00000034971.16	MYOC	2.88181788526434	0.864903111775529	0.000862383294743488	0.0361077404880332	142.6278	118.9818	32.21111	1.143991	18.16349	3.44405	0.0289219	8.88768	1.04317	7.8321781884	2.92964	0.0501407	0
ENSG00000224892.6	RPS4XP16	-1.60121084719042	0.480740620051253	0.000866226885178136	0.0362074058677922	0.510064189571	0.0976446	0.361218	0.663093	0.316776	0.404489	2.076589	0.882019	0.654538	0.673703	1.460318	2.289686	2.061604
ENSG00000108309.13	RUNDC3A	1.57305445144303	0.472830612354648	0.000878216893645773	0.0365054693219359	4.548043	1.615471	4.41743	2.382411	0.5996015	0.6228465	1.28537	0.7026186	0.9385487181492	0.4708666	0.602546	0.7120013	0.4806125
ENSG00000113810.15	SMC4	-1.48162954479771	0.445445632729992	0.000880470438663708	0.0365054693219359	11.572406	12.0971306	8.8913672	30.05970506	7.92642	28.0531050016897	28.4540191	22.624356	35.050001	79.548564	62.085809	109.029259	59.15638552
ENSG00000133063.15	CHIT1	-2.72296512530555	0.818262423649632	0.000875533350009638	0.0365054693219359	0.764909417	0.0179565	0.964068	1.7632304	0.3523699	0.1461247	0.4731221	0.0823849	0.9568879	31.0938133	0.5993683	17.7700792	21.1630604
ENSG00000133119.12	RFC3	-1.20511034001163	0.36229997848758	0.000880141929106044	0.0365054693219359	3.502628	4.16807	3.480755	4.9876667	4.074287	7.333955	10.74549	5.344756	26.627519	10.030129	7.557799	11.639373	14.343709
ENSG00000184602.5	SNN	1.53267957703125	0.460805169434182	0.000880734095178651	0.0365054693219359	29.5856	52.8596	24.3757	4.3348	50.2934	15.2974	3.87394	14.9213	14.7568	11.0788	13.9889	6.05132	9.07145
ENSG00000227440.1	ATP5MC1P4	-2.37444874971288	0.714018055619811	0.000882682125046026	0.0365250320807089	0.41483	0	0	0.485277	0	0.498883	2.78165	0.410879	2.00942	0.36189	3.96678	1.80779	2.97036
ENSG00000164442.9	CITED2	1.62431673925946	0.48851935263984	0.000884250972619505	0.0365288653046238	79.2893158693	197.46787	60.5688370863	22.16661	31.65850133701	14.7579919125	12.874690854124	42.05146	19.45263159087	21.946570905	16.7253195058	19.8709905769	20.91106
ENSG00000196296.13	ATP2A1	-1.73787045951171	0.52289971748465	0.000888873479070295	0.0365775762174892	1.3068168	0.437633	0.38121	1.823681	0.724309	1.1793152	8.263676	1.036291	2.631335	4.972358	2.060842	5.764096	1.932911
ENSG00000115363.13	EVA1A	-2.10641276823393	0.633801396502358	0.000889085852648367	0.0365775762174892	1.39057	0.656477	0.505780478	0.489164	1.027235	0.6664737	0.549505	2.061378	23.635038	4.490717	2.561455	1.443512	0.93189852229
ENSG00000205869.2	KRTAP5-1	-1.75900168074025	0.529307298617398	0.00088986465479606	0.0365775762174892	1.01577	0.131011	0.343454	0.211303	0.126419	0.321705	1.06838	0.601237	3.71153	2.11968	0.922912	0.579646	0.920383
ENSG00000196182.10	STK40	1.55219206612224	0.467285286827409	0.000894636108667972	0.0366382267354761	65.815993	173.326748	67.958545	14.987756	122.629191	24.526674	23.119902	49.796203	23.219931	21.645111	30.91523	22.60702899899	18.139113
ENSG00000180745.4	CLRN3	-2.95253660868136	0.889076065845408	0.00089726269556268	0.0366382267354761	0	0	0	1.11196	0	1.16874	35.6082	0.520532	34.3868	1.83531	1.87013	5.51096	8.82648
ENSG00000229644.6	NAMPTP1	1.91426153754289	0.576381278089675	0.000896401785983139	0.0366382267354761	7.14787	46.3357	10.5352	1.51476	22.7222	11.0631	1.70762	3.24099	9.91076	5.78146	1.51936	6.84106	1.96061
ENSG00000260060.1	AC009088.1	1.2123120186067	0.364935315962514	0.000893774157299061	0.0366382267354761	0.952476	1.76632	2.25503	1.30018	2.21968	1.13241	0.81389	0.548299	0.61094	1.17355	0.577024	0.378071	0.951371
ENSG00000099875.14	MKNK2	0.953981818667754	0.287504090446918	0.00090615671136891	0.0368796839191179	76.769189	61.289193	83.790246265005	43.6120825	76.595323572	156.962844	27.248118	54.185043	40.121869	61.714764	43.52717016527	54.835014	48.14762
ENSG00000256084.1	AC092112.1	-2.86205539439619	0.862518907636646	0.000905826068662444	0.0368796839191179	0.114161	0.110532	0	0.0890307	0	0	0	0.225545	0	1.58991	0.7265	4.26266	1.18407
ENSG00000213988.10	ZNF90	-1.52367039689005	0.459261054566474	0.000907760641081324	0.0368842973129021	2.260745	0.593624	1.746068	1.591139	0.5705584015	2.0953099	4.070651	2.435035	4.796451	5.930848	6.751427	10.40008	1.013582
ENSG00000271855.1	AC073195.1	-1.51793660239657	0.45759606010586	0.000909252492866926	0.0368843490753969	0.519514	0.143604	0.301178	0.521035	0.138448	0.64677	1.17085	0.585831	1.57052	1.2908	1.14644	0.847808	2.19477
ENSG00000170677.5	SOCS6	0.718662965488669	0.216956875067095	0.000924763093567631	0.0374521485275467	6.925159	10.45918	9.11246	6.92103	5.34807	10.19542	5.0694	5.83454	4.57208	5.3636	4.666983	7.65349	4.81499
ENSG00000158470.5	B4GALT5	0.966785065998876	0.292103864730905	0.000933858442174229	0.0376399222509865	29.2964	43.2655	34.0752	14.6388	55.7007	23.9431	16.7157	20.1077	22.5214	22.4938	13.5114	23.7732	11.589
ENSG00000203747.10	FCGR3A	-1.97691706152957	0.597310196102103	0.000933962912188552	0.0376399222509865	19.395311	2.82559	5.774363	5.3955083	20.568969	6.3781901	5.92949	8.23833632	45.848457	74.0930621569	22.2257024	86.432128	116.721061
ENSG00000177606.6	JUN	1.25565156137535	0.379343087276476	0.000932731791652433	0.0376399222509865	181.617	89.7488	268.097	34.2016	205.832	68.0454	44.2403	64.502	84.0787	81.5848	40.5086	68.0312	46.4834
ENSG00000100453.12	GZMB	-2.36904767736135	0.716285761954305	0.000941643786459557	0.0378877650340516	5.089791	5.96377	2.843426	12.602776	9.7909788	14.406335	5.790952	7.276651	21.458412	78.058496	3.710104	86.499307	285.6792263
ENSG00000154188.9	ANGPT1	1.6211121374614	0.490509902717488	0.000949923537912782	0.0381588603013828	16.3599065	5.0371946	8.9556616	2.147091	8.205635	0.8780216	0.927218	3.559853	1.9539789	3.123629	2.98011	1.369427	1.2425733
ENSG00000168216.11	LMBRD1	0.603819820287755	0.182754234116985	0.000953161470835366	0.0382268729267766	62.5250865717079	52.7403880040085	48.0322445681	25.275050842	41.0435803189351	31.690437758167	24.4112727442	38.6186600005864	37.8233044077137	34.36227734096	29.2489162606415	31.4851891	21.1520630089598
ENSG00000167778.8	SPRYD3	0.919007274295448	0.278387064553418	0.000962772874311023	0.0382492411814602	57.323727	56.344959	53.190932	27.0176303	53.4779629	26.66095	19.489736	41.097445	21.381098	22.970647	34.318393	30.334953	12.562343
ENSG00000144395.17	CCDC150	-1.88088559720917	0.569568620585625	0.000958959623375965	0.0382492411814602	0.80554316802	0.727458342181	0.703789	3.1567521	0.2007588	1.671639	3.5621716	1.5178492	6.728408	5.5622446	2.1487341	11.6534449	10.6067208
ENSG00000277511.1	AC116407.2	-1.14493189436285	0.346831247640669	0.000962993625219224	0.0382492411814602	2.43607	0.662874	1.31303	2.0784	0.425942	1.02547	2.16176	2.55403	4.68687	4.30329	2.49032	3.55195	3.28536
ENSG00000204174.7	NPY4R	-2.91692375506745	0.883566845892935	0.00096236162529539	0.0382492411814602	0.0143097	0.0455358	0.0318309	0.579922	0	0.0742608	0.4035408	0.154767	16.35471	2.87943	0.071377	11.70552	0
ENSG00000181195.10	PENK	2.84772875533941	0.862087046909283	0.000955554417773617	0.0382492411814602	86.381616	12.962349	108.48587	3.929523	15.683814	0.701377	0	5.586815	1.690763	0.588703	6.953254	0	0.120749
ENSG00000143382.14	ADAMTSL4	1.62450189210349	0.491998309642946	0.000960513175350928	0.0382492411814602	51.526822	66.967426	48.313641	10.849455	73.668023	29.94992	3.681637	41.876099	8.517288	16.873903	12.126386306	6.97707	17.940251
ENSG00000261094.2	AC007066.2	-0.845908692693337	0.256352913487176	0.000967600091010921	0.0383706157885661	4.422991	2.883733	3.388436	3.307673	1.523791	1.665413	3.252543	4.8725	6.42057	6.53088	4.575336	7.01752	6.93046
ENSG00000148841.16	ITPRIP	1.69710415781061	0.51475059470012	0.000977428030184335	0.0386328320875191	16.377618052	57.274322646	9.52667800038357	3.23367139483	38.391183	28.162738	2.611692	8.41385483847	13.431728	14.049604	5.720479	8.11409400519543	5.223722
ENSG00000197162.9	ZNF785	-0.73357143030979	0.222528840755788	0.000978896169685775	0.0386328320875191	6.81697	2.72338	5.629117	6.02909	3.358979	5.00718	7.33388	9.18849	11.057182	12.04029	6.69259	8.984031	7.986232
ENSG00000158373.8	HIST1H2BD	-1.9905119279229	0.603737537305804	0.00097729686701653	0.0386328320875191	4.69146	2.31116	3.543169	9.521183	5.32383	9.53801	35.65093	1.951474	16.13833	32.4817	7.38893	102.3586	27.28657
ENSG00000178623.11	GPR35	-1.91981292457281	0.582488528482774	0.000981135344638838	0.0386595447501402	3.692483	1.86719	2.044804	10.6757864	1.373305	6.625827	35.711506	2.994138	50.54666	15.164699	9.08493	25.126637	15.034946
ENSG00000109472.13	CPE	2.12921321383071	0.646412131671778	0.000988096596154472	0.038810238526734	201.591	236.224	75.7934	27.384	116.612	15.5945	5.90991	59.5453	22.963	35.0802	28.1499	2.56537	2.48338
ENSG00000172348.14	RCAN2	2.17281223395468	0.659598057511707	0.000987212435067628	0.038810238526734	132.44166	189.624794	51.57053	18.55684	11.28211	8.219725	4.45153	39.75294	8.5193143	18.6833064	12.1505	1.9678745987	4.276145
ENSG00000157077.14	ZFYVE9	0.843253454698071	0.256047340019795	0.00099001223361492	0.0388238553419987	9.11519	7.425744	8.89621	3.877727	6.720831	5.4587964	3.2523695	6.566588	3.5060195	3.4949091	4.8417622	5.47301	1.980376
ENSG00000196976.7	LAGE3	-0.765341645824727	0.232590992206253	0.00100007994958026	0.0391566113170308	19.7231	12.6541	15.7871	16.5894	17.4093	19.5989	32.5459	24.7509	33.026	33.4226	22.7961	55.7592	22.2053
ENSG00000118804.8	STBD1	1.50687455740862	0.458143549321867	0.00100512508711778	0.0392919751670292	9.29747	18.3146	6.76202	4.29254	11.3032	2.25952	1.9034	5.97668	1.67696	2.42899	5.5694	1.98501	2.26871
ENSG00000180938.5	ZNF572	-1.10269553135072	0.3355974424436	0.00101704531324083	0.0395984911107731	0.849871	0.315796	0.480136	0.510111	0.107411	0.515199	0.92855	1.12694	1.56711	0.695436	0.920072	1.31125	1.19177
ENSG00000163755.8	HPS3	-1.38253248196185	0.420760585722556	0.00101695461541946	0.0395984911107731	10.173402	3.738714	6.3960188	7.19944966	4.266253	7.7414903	10.1526101216	9.181693	9.9737961	21.018947	13.829911	60.452903	17.41254
ENSG00000275294.4	LINC02340	-2.77841547505465	0.845642153380586	0.00101776683558099	0.0395984911107731	0.11791	0.260838	0	0	0	0	0.278945	0.133085	0.633391	1.026068	0.107199	0.242231	4.3219
ENSG00000196550.10	FAM72A	-0.973317727701619	0.296349015421513	0.00102213195462364	0.03970589516038	1.403219	1.083349	1.602421	2.326636	2.424596	2.5929721724	3.625457	3.041301	3.826932	3.54649	4.932241	5.4303668	5.179646
ENSG00000072803.17	FBXW11	0.465780715903334	0.141885518210971	0.00102784289929931	0.0398651607259585	20.87975	22.471672	19.20324	14.218192	16.5277731	16.430145	10.600161	16.907935	12.815013	17.4538501	13.326179	19.430803	11.522643
ENSG00000253348.1	AC008514.1	-2.59724864926092	0.791532304415557	0.00103332693022783	0.0398902884375783	0.134284	0	0	0	0.171138	0.106966	0.2044073	0.398185	0.593303	0.108781	0.415311	3.02545	1.4176251
ENSG00000111537.4	IFNG	-2.65714364079211	0.809743659312335	0.001032701704602	0.0398902884375783	0.345558	0	0.200203	0.231085	1.01583	0.31218	0.116843	0.146022	0.995841	5.74919	0.224208	6.04076	19.434
ENSG00000279882.1	AC112702.1	-1.59203987167268	0.48509983848575	0.00103117166498205	0.0398902884375783	3.22939	0.571119	2.39851	1.83471	4.58175	2.36974	3.95399	6.12342	4.57472	13.6127	3.48545	20.5876	11.4706
ENSG00000135362.13	PRR5L	-1.61005393418203	0.490812318191979	0.00103665092035104	0.0399091727204957	4.853721	0.98206	0.876882	2.853747773502	6.856072	2.9812695	6.9904239	4.4095002	23.030649701	13.362986	19.491955	7.181057105	9.432648
ENSG00000253508.1	AC004080.2	-2.95317076624051	0.90028013668717	0.00103704174820282	0.0399091727204957	0	0	0	0	0	0	1.00102	0.139454	0.680839	0	0.384872	0.135564	1.34892
ENSG00000156006.4	NAT2	-2.44167016129973	0.744610125590259	0.00104129261657035	0.040010536951915	0.26874	0.0433043	0.0908127	0.0349452	0.0838324	0.0772935	2.29701	0.0883132	1.688059	0.3389	0.353977	0.042458	0.39430800149289
ENSG00000181350.11	LRRC75A	-1.58590429545547	0.483838097704477	0.00104634983187062	0.0401229417769078	1.160586	0.917376	0.801747	2.099475	1.929837	1.0446652	3.403393	1.391603	11.05497	1.672299	2.150072	7.30035	7.514928
ENSG00000154734.14	ADAMTS1	2.14828708961729	0.655692685875913	0.00105153408489883	0.0401229417769078	149.550393	110.5576	47.794364	7.7739	257.6782	5.77494	5.421188	41.974145	26.46363	35.0671880158566	7.99904	13.41459	4.68566
ENSG00000117560.7	FASLG	-2.30814821632948	0.704604442625347	0.00105360507336326	0.0401229417769078	0.535902	0.258961	0.0905109	1.39378	0.669828	0.869198	0.634269	0.821473	1.37128	5.43116	0.919271	4.42086	20.318043
ENSG00000168062.9	BATF2	-1.67885186604469	0.512514554069039	0.00105394674297798	0.0401229417769078	7.089759	3.881982	4.995723	2.44625	2.092074	5.873516	5.94125	3.328037	16.177372	10.35842	7.019388	37.392535	37.67119
ENSG00000231274.5	SBK3	2.12108657585956	0.64737113067483	0.00105116648727646	0.0401229417769078	0.469666	1.552101	0.277392	0.212922	2.010742	0.180341	0.111166	0.370442	0.0451106	0.163268	0.0853224	0.0890718	0.3080811
ENSG00000232712.6	KIZ-AS1	-2.25531883611637	0.688159120183713	0.00104796884493931	0.0401229417769078	0.138764	0.0187798	0	0.0306068	0.00918536	0	0.1400733	0.1371383	0.4176613	0.2893977	0.1261742	0.0274996	0.0467504
ENSG00000280367.1	AP002364.1	-1.27977656144848	0.390742645103601	0.00105571649503496	0.0401285786015976	0.205066	0.106676	0.0958763	0.172319	0.0888647	0.124306	0.248945	0.295221	0.529361	0.369844	0.15755	0.282868	0.695221
ENSG00000226468.2	AC018641.1	-2.49595155759909	0.762182786715895	0.00105758721851608	0.0401380302487429	0	0.0815708	0	0.19726	0	0.0668453	0.332448	0.249601	0.973537	0.293295	0.459649	0.0803635	1.95303
ENSG00000197766.7	CFD	2.55740569412853	0.781143613989218	0.00106064716480442	0.0401669152924832	62.5539	350.5146	53.82963	36.073900171038	1980.6772	41.547966	10.30654	250.29626	21.22136	18.132998	18.230888	11.671	26.53684
ENSG00000182256.12	GABRG3	2.93839922618295	0.89758489869108	0.00106159477071263	0.0401669152924832	0.014267	0.00459311	0.0192645	0.0074219	0.00447077	0.10562022	0	0	0	0	0	0	0
ENSG00000261360.1	AC010491.1	-1.70094910869426	0.519803305076843	0.00106678673702556	0.0402431192568853	0.11611100380534	0.1483214	0.0784208	0.286896	0.0544872	0.3648978	0.452351	0.324085	0.909365	0.436957	0.492011	0.65933825	1.738846
ENSG00000197111.15	PCBP2	0.474096382764987	0.144901921519354	0.00106848774911189	0.0402431192568853	455.842536	435.414085	387.176064	317.234231193993	534.9251830231	414.672933008382	245.3051482	430.899767	381.631221598866	342.161366517	291.02072300145	423.340798381275	261.108959645
ENSG00000227986.1	TRIM60P18	-1.07421823271227	0.328280496459303	0.00106692451687984	0.0402431192568853	2.16012	0.61927	1.78594	1.68495	0.969448	1.26832	1.26209	2.5265	4.84961	3.40954	2.61729	4.26849	4.47494
ENSG00000254004.6	ZNF260	-0.821516062433159	0.251137860717934	0.00107101354812325	0.0402769456661243	2.95145	1.27891	2.533	1.85105	1.626119	2.191522	3.06182	2.76179	4.64426	3.8381178	2.53773	5.925212	5.268059
ENSG00000144868.13	TMEM108	1.50920720259977	0.46162078130817	0.00107788847882319	0.040371398026637	1.9850737	3.58025032312	3.4670334	0.948872526	3.0616493	0.8746679	0.1834758	0.6872864	1.2982775	0.5712521	1.6938972	0.5120101	0.9019975
ENSG00000247400.3	DNAJC3-DT	-1.24345114023955	0.380319549299205	0.00107741368309678	0.040371398026637	1.33622	0.591713	1.00778	1.20191	0.418068	0.936221	2.78238	1.775437	5.3035	1.46664	1.7357	1.34926	2.61707
ENSG00000133661.15	SFTPD	1.42291858413764	0.435303216463515	0.0010800511413875	0.040371398026637	1.693318	0.517675	0.706957	0.326432	0.691385	1.135249	0.146714	0.504169	0.357203	0.363611	0.548949	0.264477	0.0744057
ENSG00000223403.4	MEG9	2.33836918228996	0.715306178895654	0.00107910554330417	0.040371398026637	10.083051	10.50749	3.939789	0.579039	16.35255	0.0812577	0.357845	2.35956	2.09564	1.317858	1.1102291	0.2645272	0.115605
ENSG00000250182.3	EEF1A1P13	1.10486132705758	0.338059767179719	0.00108217568217701	0.0403897997820064	1.47916	1.31988	1.14288	0.454574	1.03424	0.899087	0.25574	1.07602	0.592105	0.375723	0.612939	0.557322	0.237741
ENSG00000228146.8	CASP16P	-2.0326250412725	0.622038439581252	0.00108431367073126	0.0404086472624172	0.1945251	0.1394743	0.0259676	0.1441817	0	0.1338218	1.312329	0.6516633	0.2530218	0.214426	0.224067	0.372317	0.6001459
ENSG00000279365.1	AP000695.3	-2.58959408597708	0.792734805102868	0.00108824774127102	0.0404334690056327	0	0	0	0.0925899	0	0	0.0505233	0.526218	0.427006	0.25771	0.0269416	0.112233	0.237585
ENSG00000147044.21	CASK	-1.25409062504051	0.383858338535286	0.0010866824457221	0.0404334690056327	7.258204226	8.6898134	7.3357192	10.9010766	7.61004970726925	9.3881578	28.52902560759	7.8290068	31.4563984	30.3456953	9.620317478	42.8013015	14.8765518
ENSG00000157765.12	SLC34A2	-2.84093112420198	0.869800067941404	0.00109005597874893	0.0404399328248012	0.0256144856	0.0371363	0.0389393	0.339961	0.0120355	0.726852	2.45712	0.0252422	0.319394	25.3118	0.244327	6.583656662268	0.0513484
ENSG00000084628.9	NKAIN1	2.12961636683028	0.652303112071902	0.0010955493056857	0.0405828855826238	0.231403	0.27153966	0.42626	0.0328286	0.157919	0.215612	0.0165993	0.1289271	0.121057	0.01827	0.0764083	0	0
ENSG00000171365.16	CLCN5	-1.38969418424138	0.425974879480871	0.00110478871689029	0.040802980297687	1.38985	0.999418	1.06335	1.9746639	1.21118	2.010662	4.6633438	1.59337	5.8458898	2.04765	1.8518194	8.8870287	6.1010398
ENSG00000113070.7	HBEGF	1.88747392507521	0.578544623008375	0.00110452968729941	0.040802980297687	33.827281	49.045073	21.075044	4.600473	132.46602	104.524231	8.293392	8.195842	15.158263	35.284605	7.7546838	26.836282	6.88399
ENSG00000134294.13	SLC38A2	0.915508374834298	0.280812495172659	0.00111328814761668	0.0409075937139431	61.5439973	112.066209	75.484792	47.550021	73.739462	102.3615177	22.055273	72.546422	46.9425237	62.4600969	29.8863418	56.633926	37.7088715
ENSG00000092330.16	TINF2	0.877510614999304	0.269177384676454	0.00111423391243474	0.0409075937139431	50.91506	113.472632	56.0704947842	34.0996910170737	69.847266	53.038823	22.641707	49.788022	36.655635	36.328818	43.246878	40.8272971209	34.177559
ENSG00000165973.18	NELL1	2.1302134839829	0.653320053901571	0.00111177886688388	0.0409075937139431	1.245319	1.0247514	1.114411012423	0.755788	1.0879770927665	0.1655939	0.9747164	0.2283217	0.1876457	0.0511493	0.1775947	0.0215829	0
ENSG00000106123.11	EPHB6	1.30349031307219	0.399787435518994	0.00111232272212136	0.0409075937139431	10.4846828553394	6.658922	9.599815	10.474005	5.8350579	17.905695	3.53730300733196	8.063223162	1.809117	5.48163866153	5.14590504	1.72482300191778	4.330833
ENSG00000279137.1	AL356309.3	2.53045453027609	0.776333963356247	0.00111611833241513	0.0409160713120185	0.173895	0.0560192	0.352433	0.0678408	0.0271716	0.045734	0.0228684	0	0	0	0.0263199	0.0548163	0
ENSG00000167618.9	LAIR2	-1.94409019155743	0.596860544491367	0.00112519763781265	0.0410663946130886	0.263179	0.143934	0	1.211101	0.549632	1.556237	4.6259	1.890806	3.868228	5.757235	1.453808	3.416531	2.559502
ENSG00000165197.4	VEGFD	2.10482732309755	0.646173603460593	0.00112449254617652	0.0410663946130886	9.29425	9.12482	2.807099	1.566298	18.4701	1.10066	0.496486	6.021395	0.971168	0.532073	1.19027	0.394733	0.706523
ENSG00000130208.9	APOC1	-2.46377265496204	0.756228026310007	0.00112209950928442	0.0410663946130886	6.07259	2.169979	1.989353	54.399449	101.568337	14.698742	41.032818	28.332185	115.792596	443.145069	245.49594	226.46747	992.254744
ENSG00000166473.17	PKD1L2	2.0293893809548	0.623322623049623	0.00113088969821725	0.0411185269050453	2.924306	0.9367566	0.8151115	0.4702244	7.4325735	0.31616585	0.4811477	1.0511964	0.2474103	0.1976477	0.57723148	0.5707512	0.13429345
ENSG00000157152.16	SYN2	2.5265996137727	0.77605202230393	0.00113109583494666	0.0411185269050453	3.779883	0.9028060623171	3.956772	0.2647342	5.892202	0.7537708	0.0480871	1.005523	0.3732344	0.5375312	0.1664002	0	0
ENSG00000156515.23	HK1	1.02435508867274	0.314645982265002	0.00113161110617643	0.0411185269050453	79.050516	84.956749	85.832492	33.956247	52.240278	81.959944	30.47615807271	62.434271	19.8592322	31.305628	49.194978	42.937748	19.433727
ENSG00000184786.5	TCTE3	-1.17661927370138	0.361751818494446	0.00114370692678584	0.0414971083626329	2.32815	2.58605	1.16599	2.21327	0.8412504	2.30092	3.80073	2.18854	5.98202	7.85662	2.62453	6.72932	5.40126
ENSG00000218358.2	RAET1K	-2.4736533854347	0.760750818163282	0.00114759507985058	0.0415645751669092	0.0298608	0	0	0.0671033	0	0.0471236	0.1357083	0	0.143267	0.129698	0.135589	0.564848	0.263049
ENSG00000214093.3	AL096701.1	-2.27712641553322	0.700471085431995	0.00115060553604093	0.0415645751669092	0	0.377793	0.396493	0.303856	0.179451	0	1.53655	0	0.943101	3.39819	1.06417	1.50768	1.86012
ENSG00000249626.1	AC024560.2	-1.83861169656055	0.565553881976169	0.0011500269977507	0.0415645751669092	1.04867	0.168738	0.657398	2.11884	0.583364	2.40288	6.83885	1.73781	5.02214	2.27522	2.78868	14.0329	5.22768
ENSG00000111110.11	PPM1H	-1.50042251063663	0.461875985799509	0.00115998990239915	0.0416956914944709	0.947484	0.521887	0.628713	2.82986	0.767569	0.758985	3.6739	1.3590541	6.43482	5.271143	1.83909	4.360956	3.26715
ENSG00000197324.8	LRP10	0.932602633411689	0.287091173232674	0.00116033736594685	0.0416956914944709	114.653481	106.2560234	85.248875	44.8182097	54.7711808	83.721787	36.5663891	68.4272	49.0466596	31.168757	56.36634	61.234736	19.6917
ENSG00000145649.7	GZMA	-2.15540204873825	0.663632387074781	0.00116266021948616	0.0416956914944709	11.6562	2.17128	1.6893	18.1288	5.74117	12.9034	13.535	13.1436	16.2941	57.1019	10.5914	85.7847	191.495
ENSG00000285774.1	AL133444.1	2.87940761575756	0.886419750759032	0.00116073622532842	0.0416956914944709	0.0627377	1.27438	0.445413	0.0489445	0.17578	0	0	0.061883	0	0	0	0.0596329	0
ENSG00000173267.13	SNCG	2.31039481981119	0.71127457892951	0.00116118822833448	0.0416956914944709	74.15748	139.59571	52.29602	9.790372	381.6257	16.451672	7.044828	77.39923	9.620127	21.73181	9.225255	4.616912	1.953865
ENSG00000163295.4	ALPI	-2.68405549190864	0.827401306217192	0.00117880923973435	0.0417305216555457	0	0	0	0.05006	0	0.0505839	0.539991	0.0210688	0.0820453	0.0557202	0.0582575	0.444419	0.8204788
ENSG00000134539.16	KLRD1	-2.12622101134465	0.655199322392297	0.00117388185467288	0.0417305216555457	0.61147627	0.16515809	1.0625076	2.700902	0.9589687	1.41451	0.819122	3.471764	4.1947894	8.981166	0.9786421	7.76261	24.608679
ENSG00000227536.1	SOCS5P4	-1.60997628801305	0.496261304794644	0.00117776545666997	0.0417305216555457	0.11037	0.0711243	0.111866	0.0574089	0.0344606	0.232384	0.290277	0.145045	0.247213	0.383574	0.267306	0.592151	0.559623
ENSG00000167798.17	C3P1	-2.96749799502939	0.914433503405984	0.00117377901154231	0.0417305216555457	0	0	0	0	0	0	1.668352	0	0.0144875	0.275544	0.1223023	0.0142597	0.0423662
ENSG00000267072.2	NAGPA-AS1	2.23729424247201	0.689653880789221	0.00117829518862445	0.0417305216555457	0.3928142	0.211655	0.121363	0.689619	0.257756	0.0210251	0.0870386	0.0398507	0.0276666	0.0578124	0.1668741	0.0268051	0
ENSG00000100399.15	CHADL	1.66561626251708	0.513387720091134	0.00117713516017793	0.0417305216555457	5.04264	3.906032	10.662054	1.615368	5.784318	2.942542	0.78125	3.894017	1.126964	0.6647289	2.221072	2.148346	0.215758
ENSG00000204869.8	IGFL4	-2.5982452256282	0.800453697054953	0.00117052951537631	0.0417305216555457	0.139657	0.0578301	0.202126	0	0	0.230239	0.1219097	0.0589634	2.272908	0.0866335	0.3173472	1.858844	3.986724
ENSG00000234146.1	AKAP8P1	-2.66185884737705	0.820037663239902	0.00117030521290313	0.0417305216555457	0	0.0422856	0	0.0341242	0	0	0.172542	0.0431177	0.126005	0.380077	0.278087	0	0.210033
ENSG00000147570.9	DNAJC5B	-2.44189116610574	0.752279554800669	0.00117043358391067	0.0417305216555457	0.0425166	0	0.4222998	0.5356011	0.1910261	0.4810124	0.201271	0.2054398	1.005798	3.087179	1.2126427	3.21928	9.1205993
ENSG00000170498.8	KISS1	-2.68063306843842	0.827421997977366	0.00119638267099803	0.0422921274197802	0	0	0.216406	0.538834	0	0	7.22187	0.210543	1.031126	0.371622	1.937119	1.02958	1.015363
ENSG00000187862.11	TTC24	-2.51104365741791	0.775566049335584	0.00120501008200068	0.0425363401984406	0.397871	0.0676033	0.0287879	0.7210867	0.3072112	0.711703	0.1447901	0.601573	0.706545	4.46136000032911	0.417187	3.597608	17.1548130007484
ENSG00000108231.12	LGI1	2.75415692588668	0.85112613381583	0.00121260920269552	0.0427436107132487	15.7541798799	1.4300623	4.87410484482	0.63238873	0.238882533126	1.95357471	0.03786924	0.5898549	0	0.1189547	1.11389919828253	0	0
ENSG00000198466.11	ZNF587	-1.09203003624794	0.337627288222554	0.00121888062213417	0.0429035576027169	7.700535	5.550861	6.891682	9.289606	7.208249	7.692633	26.225034	8.458902	18.422511	17.42845	8.0380959	23.229858	19.307862
ENSG00000261357.1	AC099518.2	-2.65540138308029	0.821561528417489	0.00122867102689402	0.0431867394325179	0	0	0	0.155478	0.0927016	0	2.12247	0.295265	0.576034	0.607109	0	0.2857	0.716175
ENSG00000237070.1	AC005550.2	-2.35008820394185	0.727560672790912	0.00123750214480762	0.04342904678863	0.0425546	0	0.0287374	0.0553419	0.0266417	0.0335293	0.246249	0.0558868	0.0951962	0.320248	0.772761	0	0.170513
ENSG00000179841.8	AKAP5	-1.7865218511012	0.553149101916455	0.00123907484472713	0.04342904678863	0.7450013	0.718081	0.2745834	0.4132043	0.259162	0.27068	0.8407964	0.7024698	0.7556854	2.23477	0.5237816	1.40166	6.2851177
ENSG00000145414.8	NAF1	1.0848347206018	0.336003236574981	0.00124378768488166	0.0434710822915209	11.374388	15.251196	8.836098	3.3698626	13.717123	4.1341868	2.4754783	6.162448	5.191491	4.959112	5.172963	4.890086	4.542492
ENSG00000106682.14	EIF4H	0.68257985496964	0.211405836436386	0.00124325828203718	0.0434710822915209	192.24311	229.45106	204.22481	101.698578	188.020053	151.319302	75.827043	172.53656	144.405829	97.531065	133.323001	152.126716	80.820646
ENSG00000203585.4	LINC02408	-2.72042744680711	0.842998043443804	0.00125057730731227	0.0436467354999183	0.0962749	0	0	0	0	0.0253273	0	0.126504	0.123192	0.167274	0.302085	0.0910877	1.171332
ENSG00000144476.5	ACKR3	2.07765614313814	0.644150577485114	0.00125787993768584	0.0437781140056768	68.98528	41.95457	19.12319	3.2906548	204.19315	7.50411	5.09685	10.7537	24.85872	23.69477	6.802536	8.423789	6.60713
ENSG00000082293.12	COL19A1	2.64196632222811	0.819018321196566	0.00125633419958085	0.0437781140056768	7.050223	1.785225	2.005658	0.255777	0.00782822	0.0131202	0.0131473	0.39677	0.0239521	0.3925117	0.1935367	0.04404447	0.0439494
ENSG00000235370.6	DNM1P51	1.94878624396679	0.604311589058639	0.00126059075388376	0.0438108401753563	0.467895	0.1511815	1.022263	0.1215935	0.1441192	0.249002	0.0107435	1.850543	0.1506139	0.0782143	0.1418892	0.00942283	0.0401245
ENSG00000180385.8	EMC3-AS1	-0.963854031358073	0.299170235180121	0.00127406796686732	0.0439589112148746	2.215404	1.41402	1.835141	1.909678	0.918662	2.151642	2.266232437211	3.191874	2.172239	4.64154	3.263045	5.897496	5.144422
ENSG00000171189.17	GRIK1	2.02477673206365	0.628532815497279	0.00127551013345241	0.0439589112148746	0.2186902	0.8406873	0.097009700491415	0.0639314560445	0.520828	0.090587	0.0473598	0.101032	0.1082273483801	0.0593782334721	0.014140800720941	0.13717340572374	0.0160289
ENSG00000169330.8	KIAA1024	-1.28824037216208	0.399893561719509	0.00127540088978371	0.0439589112148746	0.269292	0.118906	0.171434	0.3397886	0.151845	0.193876	0.9280803	0.234886	0.7499259	0.420834	0.419122	0.464181	0.690775
ENSG00000110429.13	FBXO3	0.646961003933248	0.200706225452863	0.00126668479565154	0.0439589112148746	27.3664083	19.6594892	25.1402666633	12.345683	17.5564665	21.22884	10.6604155	19.735302	11.9147913219136	10.5691421999	16.5164153	14.468568	14.579936
ENSG00000115665.8	SLC5A7	2.76182437292208	0.85703460792171	0.00127061458758647	0.0439589112148746	1.68472	1.02936	1.91196	0.1070206	0.0476754	0.0216407	0	0.08109152	0.00972786	0.0440587	0.221145	0	0
ENSG00000181585.4	TMIE	2.01991691905247	0.626838709043583	0.00127127291107431	0.0439589112148746	1.682180925642	0.643613	1.3741370590307	0.218748	0.393997	0.774651	0.055303	0.24178	0.118784109791	0.0913425	0.6683930403689	0	0.0561187
ENSG00000184185.9	KCNJ12	1.69229157680669	0.525594061414404	0.00128293836193207	0.0441534210931975	1.59669	0.436679	0.828083	0.315231	1.50925	0.203209	0.0834915	0.426277	0.350335	0.158673	0.497775	0.0950924	0.0848073
ENSG00000165752.16	STK32C	-0.871231605875046	0.27069308474249	0.00128853156560427	0.0442843244317745	8.507357	4.381782	5.898051346	5.7110760696199	7.634764	5.462188	16.713186	10.387723	16.670432	8.865112	10.589724	16.898569235453	7.165801
ENSG00000182327.7	GLTPD2	-1.8949905451246	0.588958161549116	0.00129299510669005	0.0443760941956245	0.188502	0.236241	0.185781	0.486474	0.171114	0.724797	2.65585	0.556839	0.528246	2.40217	0.289828	2.91245	2.03514
ENSG00000237575.4	PYY2	-1.8333527452318	0.570205474452556	0.00130331286604305	0.0445448575555737	0.229467	0.055482	0	0.358043	0.10722	0.449176	1.04096	0.547578	2.162195	0.947508	0.677492	0.381385	0.734183
ENSG00000163394.5	CCKAR	2.33651524832416	0.726542131901106	0.00130018421062579	0.0445448575555737	0.297565	0.159781	0.167538	0.283764	0	0.104384	0.0260873	0.0651679	0	0.0287235	1.98177	0	0
ENSG00000234350.4	AC007405.1	-2.42639236321341	0.754602329966509	0.00130236392039107	0.0445448575555737	0.0257855	0	0.0261275	0.0804776	0.0241831	0	0.1819043	0.0254067	0.511401	0.491625	0.4569318	0.1710241	0.0206537
ENSG00000108175.16	ZMIZ1	0.693093955437215	0.215672406599864	0.00131062864663191	0.044733111532285	48.2807	34.711506	43.688201	16.9810383	32.3396432	24.073715	12.4271145	31.427467	21.9641922599	23.077718	24.7904015	22.857684	19.172068
ENSG00000281468.1	AC006504.8	-1.4770625831609	0.459704956324647	0.00131325890852563	0.0447566761993983	0.923778	1.56527	1.28999	0.900527	1.28641	2.20382	6.9206	1.25479	5.56573	2.91489	1.67967	7.18735	5.43525
ENSG00000147894.15	C9orf72	0.567973445870916	0.176790076934239	0.00131493649613912	0.0447566761993983	8.5811528	7.177827	9.12243	6.2315778	9.262207	6.78418	2.8218787	7.13307	8.512675	6.252106	5.376252	5.663847	5.5084647
ENSG00000175387.15	SMAD2	0.807676172706894	0.251546428792337	0.00132346068457111	0.0449849376919124	41.68992	49.182528	45.344984	20.5909086	42.981349	35.9366560012493	12.879848785	40.658841	21.456488	21.3293723	31.591615	25.724882	18.608363
ENSG00000117215.14	PLA2G2D	-2.65234278713473	0.826398566238422	0.00132956762498845	0.0451038986559587	0.333824	0.117319	0.24603	3.64649	0.3698095	2.203122	0.4070699	0.1794342	0.7280335	31.50599	4.244241	15.80486	67.1469
ENSG00000146039.10	SLC17A4	-2.97364106922074	0.926571251432274	0.00133060602218023	0.0451038986559587	0	0	0	0.0571667	0	0	7.175398	0.0289827	12.905431	0.0255506	0	0.0971822	3.68436
ENSG00000284294.1	AC007326.5	-0.926613794165445	0.288804677264179	0.00133455038415659	0.0451617290394769	9.21595	5.11480000209206	2.93046	5.00393	8.14452	4.48635	8.40786	10.158144	10.0496	12.8847	9.45422	21.13637	14.07038
ENSG00000105426.16	PTPRS	1.72255914638442	0.536933826972465	0.00133596224113547	0.0451617290394769	22.4844331	16.2159891	22.8692899	7.5094841	39.785514	11.422417	3.619617	16.9742465	5.5252754	4.0166876	9.138342	0.97443662768	1.5314
ENSG00000164040.16	PGRMC2	0.872013546141683	0.271971006443055	0.00134465918834942	0.0453937129818641	47.2424832	67.202325	50.7241399	44.7779100769144	104.33335154	50.1193276	28.0315777	43.82967956	37.9505143	37.698852	51.69705994	26.816081	28.0673032
ENSG00000092051.16	JPH4	1.46703992916602	0.457808525213373	0.00135304979839701	0.0454046653721414	1.6069423	0.897155	1.315696	0.4667428	0.7891281	0.252856	0.180862	0.737506	0.1586384	0.212301	0.5347517	0.144205	0.220406
ENSG00000143869.6	GDF7	1.89157225477805	0.590404509635982	0.00135599303738179	0.0454046653721414	0.764707	0.465551	0.779917	0.657223	0.104241	0.396827	0.0962011	0.44736	0.0636998	0.0529088	0.160969	0.0104347	0.0844237
ENSG00000163564.14	PYHIN1	-2.14435166485191	0.669143211894489	0.00135239535990328	0.0454046653721414	1.116024	0.2664101	0.4401936	2.451642	0.754734	1.866107	1.0620101	1.274087	2.090892	11.0194401	2.393585	6.985634213114	26.4198912
ENSG00000270557.1	AC013731.1	-1.79038066990648	0.558737286012361	0.00135375509482896	0.0454046653721414	0.588517	0.0711704	0.149265	0.688619	0.137243	0.524497	2.43721	0.580679	1.13213	1.59931	0.802143	1.12038	2.70476
ENSG00000188778.5	ADRB3	2.4980380737873	0.779673806238718	0.0013555469821465	0.0454046653721414	9.489111	0.9901326	2.742877	0.0855586	0.17154	0.172856	0.0432615	0.316486	0.10515	0.126965	0.948993	0.0345091	0.0439284
ENSG00000196787.3	HIST1H2AG	-1.76836289739493	0.551760197797852	0.00135086751450293	0.0454046653721414	0.563849	0.213205	0.447111	0.248668	0.160965	0.386686	0.696377	0.289849	0.823094	1.40534	0.556544	5.7688	0.844401
ENSG00000273619.1	AL121832.2	-1.15966760669989	0.362017441878054	0.00135840041101108	0.0454238083384719	2.89809	0.83129	1.30785	4.01813	1.19688	2.55878	6.09464	4.02837	5.89535	5.97846	4.19562	6.67328	5.31109
ENSG00000257596.1	AC078778.1	-1.71568800829515	0.535760619565723	0.0013631569680051	0.045521348411992	1.12684	0.636192	0.190631	0.878889	0.349562	1.04337	2.22184	0.927068	2.35089	6.04559	1.1095	1.25502	5.62404
ENSG00000189292.15	ALKAL2	2.06282565094358	0.644452692220313	0.00137001261435751	0.0456886282240926	1.425899	12.95681	1.095416	1.128466	4.265865	0.7668498	1.155254	1.3994573	0.459436	0.65698512	0.855982	0.7576962	0.0732171
ENSG00000155629.14	PIK3AP1	-1.63135616493379	0.509735884963493	0.00137239375396556	0.0457064380106026	2.626911	1.610127	0.84048	3.7173537	5.37474	3.72386	8.882403	2.8598418	12.148476	12.208426	3.1924616	23.138356	18.293943
ENSG00000283078.1	AL137077.2	-1.54375314532866	0.482665066142705	0.00138195234369188	0.0459629176675478	0.285541	0.207003	0.397928	0.389877	0.234058	0.253608	0.253458	0.422141	1.26764	1.36445	0.324162	2.06106	1.82891
ENSG00000274641.1	HIST1H2BO	-2.94663821534086	0.921537408102621	0.00138612753191687	0.0460399003721918	0	0	0	0	0	0	0.429834	0	0.792497	1.89964	0	7.92923	0.649215
ENSG00000088053.11	GP6	-1.91024072134948	0.597569422118022	0.00139017041203914	0.0461122879971963	0.3049864	0.120806	0.1233341	0.113965	0.0739112	0.313547	1.586429	0.2878203	0.2296368	0.4083803	0.277142	2.589346224718	0.4345225
ENSG00000277586.2	NEFL	2.50313861030974	0.783415243651869	0.00139752375520217	0.0462322531049167	2.484762	0.420103	3.681801	0.0404075	0.0362858	0.0919505204	0.0131969	0.280063	0.0287218	0.1820096	0.2446415	0.0849299	0.0239705
ENSG00000238213.1	TARDBPP2	-2.89333117989716	0.905447289886081	0.00139602478853526	0.0462322531049167	0	0	0	0	0	0.0385283	0.192284	0.0480593	1.91968	0	0.0442758	0.0462328	0.351028
ENSG00000256802.2	AC022613.1	-2.10629330162637	0.659423604082488	0.00140246618436283	0.0463338127263795	0.194123	0.208412	0.196677	1.755304	0.434938	0.153057	5.44926	2.081903	1.079911	3.286825	0.999134	8.16654	0.610282
ENSG00000170145.4	SIK2	1.455466637421	0.455787413411384	0.00140655996855105	0.0464071018957277	12.9899	18.959	11.4329	5.65625	43.4356	4.516605	3.69062	8.35443	5.31495	10.0906	6.073534	5.83614	3.92317
ENSG00000166736.11	HTR3A	2.25874384020796	0.70755457132933	0.00141132647961532	0.0465023618349949	2.659959	0.487299	2.32050447746	0.218574	0.066405	0.442005	0.366539	0.1839349	0.0684456	0.0973342	0.254394	0	0.0448717
ENSG00000156206.13	CFAP161	-2.09572048836163	0.656881337266787	0.00142071307207431	0.0467493949048921	0.0702379	0.130804544	0.0711866	0	0.098705	0.0277243	0.0554189	0.133441136	0.404507	0.434057841	0.12758	1.137007	0.168709
ENSG00000104435.13	STMN2	2.57901130930898	0.809604025086259	0.00144493193655947	0.0473304214886849	24.295990912	7.1297384464	28.144552	2.442156	0.046602	0.288461	0.646864	3.37778	0.524288	0.454428	1.55657	0.0234782	0.1040029
ENSG00000113088.5	GZMK	-2.09093911657412	0.656356959403864	0.00144417370201217	0.0473304214886849	5.286947	1.18759	0.700447	5.75063	1.61321	3.48648	1.799635	8.43872	5.504034	17.7829	6.41587	10.819057	70.76098
ENSG00000203335.4	AC006019.1	2.66772370309457	0.83744930600764	0.0014448684725477	0.0473304214886849	0.0221394	0.256708	0.224309	0.0172747	0.0415441	0.0349134	0	0.0436235	0	0	0.0201037	0	0
ENSG00000069020.18	MAST4	1.15310105514902	0.362006621722273	0.00144602136372786	0.0473304214886849	11.2375026	16.5711463	7.9017625	4.2537345	16.0856875	17.89247	3.827036	11.5211559	8.1984191	5.7922332	5.1242611	3.9080052	4.0725498
ENSG00000114993.16	RTKN	-1.22435489484227	0.384679100668125	0.00145860614110777	0.047666792893647	17.110884	6.392753	21.725921	15.8875079	9.812901	26.973735	32.337934	22.568955	99.607822	37.494403	25.873786	47.960395	44.5162068
ENSG00000269964.3	MEI4	2.34900258182784	0.73810234473773	0.00146015069765142	0.047666792893647	0.158042	0.0477064	0.180082	0	0.037122	0.01659941	0.01661314	0.00972796	0.0094677	0.00857615	0.0179361	0	0.00791726
ENSG00000231748.1	AL596223.2	-2.58947404454091	0.813827053019403	0.00146338558640146	0.047709454987489	0	0	0	0.166452	0	0.855932	3.06752	0.211416	7.49493	2.97948	0.194396	1.67352	1.59113
ENSG00000260589.1	STAM-AS1	-1.64016829025855	0.515931020827178	0.00147760795753742	0.0481097485648205	0.251807	0.202752	0.0850383	0.245598	0.0196906	0.231614	0.331154	0.186054	0.885522	0.82009	0.381084	0.574783	1.39533
ENSG00000145194.18	ECE2	2.87968900719625	0.90600972242202	0.00148074672196557	0.0481485908476188	1.452908	0.3332872	1.53762246	0	0.0191172	0	0	0.133443	0.0464217	0.0117987	0	0	0
ENSG00000188610.12	FAM72B	-1.44660054289747	0.45521391691448	0.00148372617343309	0.048182157692391	0.538344	0.962278	0.641059	1.367523	0.6053293	2.296753	2.35669000309727	1.4509750255853	2.00293	3.709488	3.918832	5.119494	6.041867
ENSG00000236772.1	AL034550.1	-1.71268041375945	0.539144657923502	0.00148980493435913	0.0483161508528398	0.321429	0.185505	0.129681	0.152608	0.18049	0.202399	1.62702	0.252236	0.678231	0.724956	0.176726	0.915887	0.617958
ENSG00000087088.19	BAX	-0.957981625775243	0.301751107489742	0.00149970273517327	0.0485734871490349	81.402384	50.5729784	51.163098	111.41724	57.848756	88.24715	185.239561	96.189313	159.043827	171.5771	110.980758	213.874297	174.464301
ENSG00000141570.10	CBX8	-0.977586639231041	0.307977627582364	0.00150243307636962	0.0485983091173414	3.135049	1.601169	2.121009	3.19251	3.56856	2.831887	5.56363	3.26625	7.20734	8.25662	3.87792	10.647048	4.24332
ENSG00000227671.4	AL390728.4	-0.883704157955897	0.27852026707308	0.00150948384948681	0.0486607136090123	30.4337359	22.30287	26.827930967953	39.54117	26.723	34.27653	65.91648	38.112341	54.98203	71.24968	38.19181	82.9791	77.43167
ENSG00000056736.9	IL17RB	-1.97193370546554	0.621530852992955	0.00151026179235084	0.0486607136090123	1.01056	0.2622832	0.973461	6.179407	0.660988	1.6258672	11.5399	1.688154	7.255702	14.998348	3.35723	13.32109	15.753564
ENSG00000115594.11	IL1R1	1.98078007969107	0.624185313094382	0.00150672769874774	0.0486607136090123	49.153754	316.400244008125	42.8572721	22.8963306068543	234.286138	13.9500488	11.6332981	71.9105035	39.80541	28.42587	16.5411157	11.3195635	12.020662
ENSG00000109132.6	PHOX2B	2.8853696934226	0.910359398723062	0.001527097820762	0.0491391880035836	1.26086	0.274518	1.25933	0.1151615	0	0	0	0.069974	0	0	0.0322497	0	0
ENSG00000158104.11	HPD	2.28950890699165	0.722462421921763	0.00152945826134106	0.0491512268530969	3.128471	8.943268	4.140401	0.482477	2.12281	0.390768	0.0788324	1.903475	0.285188	0.479736	0.68122	0	0.1378131
ENSG00000142871.16	CYR61	2.11249104847515	0.666866268994799	0.00153603419269199	0.0492985293101987	630.5646	321.4696	253.8604	17.63297	702.1748	17.99742	38.34211	82.11835	111.4625	149.8118	11.929475	34.08611	16.04162
ENSG00000245468.3	LINC02447	1.94603730728455	0.614811193169082	0.00154944402116588	0.0493830883695872	1.2701993	1.978257	0.3788178	0.31201	2.1404462	0.964706	0.0813795	0.3430656	0.3216775	0.1120411	0.67393	0.0244108	0.4271421
ENSG00000107807.12	TLX1	-2.80613957645128	0.886684460788729	0.00155213288552543	0.0493830883695872	0	0	0.189531	0.489812	0	0.0731964	0.833534	0.1848097	1.849781	0.0266527	0.1671777	18.201272	4.590726
ENSG00000277304.1	AC142086.6	1.64652635895739	0.520098828930718	0.00154659659980637	0.0493830883695872	0.224785	0.593744	0.423064	0.100221	0.310067	0.337255	0.102094	0.201701	0.0926405	0.16774	0.145816	0.0607641	0
ENSG00000105835.11	NAMPT	1.7427535541751	0.550539188980875	0.00154795637955735	0.0493830883695872	103.613216	496.004809	213.613548	21.1680229	275.382651	117.5023287	23.0772065	52.0542073	138.259335	93.223387	20.0433412	83.851698	28.6864658
ENSG00000147168.12	IL2RG	-2.11050091337679	0.666896414012995	0.00155263862402662	0.0493830883695872	10.971568	6.166051	4.617297	46.854536	15.728138	35.147085	65.205967	17.58707873	56.756606	99.136571	18.309274	192.062969	425.6299844
ENSG00000143001.4	TMEM61	2.42540930242037	0.766172225576889	0.00154753383253106	0.0493830883695872	25.9351	5.51852	23.2196	0.762895	0.141369	1.77253	1.00841	1.18461	0.144003	2.21873	2.4562	0.567176	0.0448149
ENSG00000090932.10	DLL3	-2.5508557057234	0.805874186356316	0.00154908495846602	0.0493830883695872	0.0270921	0.0261814	0.0823572	0.0333693	0	0.0371781	0.192392	0.084325	0.0745967	0	0.0428106	1.659783	0.517422
ENSG00000175470.19	PPP2R2D	0.482780386325124	0.152590430201982	0.00155671940645117	0.0494493218390684	23.38601	24.880239	24.536142	14.308025	24.386476	16.857615	11.193516	19.74976160781	17.6103401	15.9538467	19.336531	18.9078845	14.675358
ENSG00000103550.13	KNOP1	-1.31241101824617	0.414862705821073	0.00155893583887709	0.0494562401705302	10.302922	5.68237	7.915931	23.501478	9.06735	19.39056	52.958103	20.726016	44.543563	54.70158	31.085677	30.04674	21.235457
ENSG00000155465.18	SLC7A7	-1.39698155524117	0.441691214308871	0.00156258934310821	0.0495086725931019	8.4782065	3.1116688	5.6112502499	13.691562	9.857992	7.65631827359654	11.8466963167282	10.7808489052	22.85099756077	30.581679	10.7558054236	45.05467	45.999561
ENSG00000123201.14	GUCY1B2	-2.60047771665878	0.822532945820492	0.00156932737428922	0.0496585752900085	0.5580279	0.0181792	0.0314744	0.0229996	0.0176603	0.0148314	2.9461574	0.3817744	1.000314	0.8683505	1.5653884	0.145983	0
ENSG00000165502.6	RPL36AL	0.669723857758228	0.211917348978924	0.00157603040826222	0.0498069890835869	368.51	516.944	322.763	357.975	332.834	271.027	170.324	328.46	186.748	235.823	248.872	372.513	217.807
ENSG00000259422.1	AC091100.1	2.36728357898437	0.74951447378967	0.00158625333873853	0.0500305329245055	0.186653	0.13527	0	0.200253	0.0437754	0.0551964	0	0.0229871	0	0.0405288	0	0.0440908	0.0186901
ENSG00000138166.5	DUSP5	1.58556643793079	0.502038211633044	0.00158714763975497	0.0500305329245055	64.8195	103.039938	17.789306	15.7221	47.9373	61.251012	7.23458	11.72198	17.6895	35.9253	3.65932	20.2011	25.804689
ENSG00000274750.2	HIST1H3E	-1.70284208059174	0.539744789016898	0.00160551855188224	0.0505077458447343	0.57497224	0.332994	1.16805	1.24966	0.266349	1.11876	3.35931	0.659069	3.01364	5.514986	0.696612	7.14164	2.14395
ENSG00000067182.7	TNFRSF1A	1.27370901289279	0.403743525611111	0.00160636880096205	0.0505077458447343	151.876529	284.455589	153.042143	56.048125	359.109999	82.920003	50.066677	128.59946	105.792627	91.09297	83.70886	52.82384976	49.3691700097515
ENSG00000196843.15	ARID5A	1.91107325026286	0.606086046005462	0.00161525147044613	0.0506080957894321	62.406346	422.878602	59.384445	17.762162	80.539331	10.130942	11.776457	31.5617055	33.310309	40.3398041	25.8022988	16.084687	30.44476
ENSG00000179934.6	CCR8	-2.2465599898142	0.712501910746111	0.00161569592538498	0.0506080957894321	0.238624	0	0	0.13396	0.0446478	0.301759	0.1669566	0.235269	1.049254	2.873653	0.303452	0.36208	1.396012
ENSG00000243789.10	JMJD7	1.16017555888471	0.367925582946931	0.00161442093760622	0.0506080957894321	4.717905	4.957269	5.690096	5.908182	5.806616	17.359334	2.595915	4.953497	4.368054	3.658895	4.703153	2.4096734	2.729483
ENSG00000164066.12	INTU	1.36346839273992	0.432585642249516	0.00162209624176393	0.050744338182615	8.519712	7.831354	5.866363	1.682608	3.7709917	1.724445	0.946892	3.5724747	1.8550873	2.524057	2.826344	0.920813	0.916302
ENSG00000197343.10	ZNF655	0.896562595312113	0.284506743265744	0.00162552297373305	0.0507873307891722	45.577884	74.3521913	57.194403	38.337405674299	36.3130779351	45.180327	22.7680066	46.1714891	43.04161	20.6252539	32.2823778393	15.914379	21.711351
ENSG00000186564.5	FOXD2	-2.26619336712817	0.719259393773971	0.00162862025858733	0.0508199348029554	0.145999	0.0216973	0.0682521	0.648486	0.0633008	0.185774	0.389934	0.188036	0.678221	0.994627	0.18354	3.89796	4.26659
ENSG00000134317.17	GRHL1	2.24820632230015	0.713826276783632	0.00163541903950606	0.0509678137689892	1.350339	4.1390044	3.1517031	1.6025463	12.9753574	71.476491	2.0560802	0.559353	3.027253	1.7371039	1.5790928	7.3921357	3.1872883
ENSG00000148200.16	NR6A1	-1.88190029697942	0.597657132039441	0.00163944681631903	0.0510290710312132	0.267878	0.213373	0.39492	0.143525	0.511673	1.100649	1.858414	0.413402	6.687362	0.498223	0.768152	1.6711382	3.3041445
ENSG00000263588.1	AC091043.1	-2.43630617178487	0.77392216790759	0.001643922839799	0.0510836713632109	0	0	0	0.308555	0	0.158486	1.2483	0.783592	2.10723	1.55297	0	0.765715	0.472202
ENSG00000279845.1	AC097372.3	-1.79141416802566	0.569109621646903	0.0016453298070915	0.0510836713632109	0.565074	0.365208	0.191643	0.146875	0.520746	0.452306	2.22811	0.745855	0.546884	2.62803	1.37162	0.546247	1.7986
ENSG00000124334.17	IL9R	-1.91714005917628	0.609727872684182	0.0016651013730621	0.0516327487173203	0.25668	0.1631269	0.0584017	0.894783	0.0771679	0.33976	1.3484776	0.3812517	0.956418	2.299152	0.638425	1.637662	3.347486
ENSG00000277837.1	AC090340.1	-2.90590226886911	0.924327792293133	0.00166769033926215	0.0516483071902902	0	0.0101562	0	0	0	0	0.116154	0	0	1.08634	0.582305	0.00991535	0.00842716
ENSG00000100926.14	TM9SF1	0.572635320610846	0.182231619003335	0.00167598214167369	0.051674626250083	27.005625	29.914287	19.8718251	19.533999	28.276681	19.848444	13.759694	19.36251	23.690957	19.6140347	12.78103072	24.214749	12.574019
ENSG00000165606.8	DRGX	-2.80734467573011	0.893203312076493	0.00167221576525277	0.051674626250083	0.0396033	0.0191323	0.0675124	0	0	0.0312201	0.124999	0	0.702643	0.0171969	0.0179804	0.0187001	3.240343
ENSG00000188981.10	MSANTD1	1.9802645752682	0.630218013806779	0.00167689330688287	0.051674626250083	3.234292	5.1104663	4.21794	0.3973892	0.235121	0.1977995	0.2202511	0.8879046	0.3495471	0.5578145	0.6555303	0.1720532	0.534053
ENSG00000123411.14	IKZF4	1.71520173810784	0.545831204402064	0.00167588068295545	0.051674626250083	11.8950309	33.690241	28.109265	1.8002851	5.2779575	3.5567619	1.824123	5.392327	2.872528	5.681452	5.099809	2.2849551	5.100258
ENSG00000242779.6	ZNF702P	-1.47346136965827	0.469122148413883	0.00168434908359416	0.051839823474549	1.533912	1.282442	1.6106801	0.5509912	1.040612	0.9299435	7.483524388	1.694650490169	2.2203	1.786932	1.4889662	7.3722131	2.680367
ENSG00000160957.12	RECQL4	-1.74436440179513	0.555443087908435	0.00168664492536765	0.0518459983580405	3.877698	3.0720657	2.4548474	18.396066	2.626317	15.134748	19.45255	8.847457	36.369028	36.986597	29.494804	37.989215	64.019443
ENSG00000187144.11	SPATA21	-2.68721697258064	0.85578812097705	0.00168919349751748	0.0518599169926427	0.0319488	0	0.0868188	0.0249277	0	0	0.171863	0.0529443	0.0464356	1.0856284	0	0.0604536	0.8833382
ENSG00000274297.1	AC009269.5	-2.31389349974443	0.737026425700541	0.0016923716988386	0.0518931074197785	0.388336	0	0.13151	0.100942	0	0	0.510356	0.127928	1.24878	1.57799	0.117704	0.745212	0.619227
ENSG00000260914.3	AC026464.4	0.982149935423874	0.313107789432781	0.00170814835685106	0.0523120434285638	33.7269	52.2303	43.7706	13.2685	39.1761	28.0321	14.8528	30.5022	21.8008	14.3548	20.1829	24.2706	8.8546
ENSG00000259956.1	RBM15B	0.51999122746142	0.165843968332792	0.0017160564360587	0.0524341586308088	14.2968	17.1206	16.1471	10.3557	15.0236	13.3256	7.11675	12.6351	15.9706	8.94027	11.6156	13.2821	8.50076
ENSG00000166579.15	NDEL1	1.06133078413448	0.338502544332841	0.00171637375190766	0.0524341586308088	61.094839	77.25013	32.734273	15.911166	82.413676	38.4988663	21.8846472	32.0521861	32.0919405	30.422133	23.339532	31.095535	14.614159
ENSG00000226696.5	LENG8-AS1	-1.19672140543136	0.381817281662511	0.00172277710978343	0.0524355714410712	6.1525	1.251357	5.75623	4.58314	1.373555	2.646699	9.468898	5.873969	10.15468	6.67874	7.32828	13.68233	10.55834
ENSG00000127472.10	PLA2G5	2.47614271647296	0.789986721898115	0.00172199744768303	0.0524355714410712	39.768081	25.515551	19.906753	0.9572865	25.7753297	0.8458429	0	4.2980621	2.479385	2.9503007	4.8858776	0.0992536	0.376537
ENSG00000143184.4	XCL1	-1.73644858433938	0.55397146707149	0.00172120754729075	0.0524355714410712	0.129189	0.208163	0.523844	0.436774	0.524003	0.136083	0.339763	0.849037	2.9723	1.0852	0.860499	0.530534	3.27433
ENSG00000204767.3	INSYN2B	-2.77652972502316	0.886319774616298	0.00173235828092087	0.0525333402713075	0	0	0.0181897	0	0.0168543	0	0	0	0.368003	0.1107503	0.0326069	0.0847585	0.5069819
ENSG00000271971.1	AC120053.1	-1.00971385268703	0.322283568571365	0.00173030480491925	0.0525333402713075	3.74912	1.36072	2.18816	2.77796	1.22121	1.71089	4.28756	3.70134	3.06848	3.83259	6.47422	5.27904	6.36208
ENSG00000137776.16	SLTM	0.352822761918914	0.11261320725908	0.00173000215478515	0.0525333402713075	65.771798	69.547631	65.880565	63.00125	62.7319218	62.9917474	47.38778	59.291556	60.314175	62.5946264	47.473697	55.662623	57.9143338
ENSG00000125531.6	FNDC11	-1.81736504965935	0.580250247821192	0.00173598195792938	0.0525579186125692	0.055101702744	0.2131560321	0.0844222	0.242064	0.2177268	0.100686	0.4995027	0.525078	0.139996	0.3831807379	0.4490731112	2.56324	0.5289550026
ENSG00000187630.16	DHRS4L2	0.775635922434777	0.247665043576558	0.00173741674783114	0.0525579186125692	22.851976	15.622669	23.7724410625055	16.46249	18.614284	32.186161	12.878455	17.907272	17.01788	10.810956	13.2783594	18.132933	6.932149
ENSG00000235288.3	AC099329.1	2.80114211972662	0.894757246441966	0.00174439581608859	0.0527046086313946	0.0910131	0	1.82445	0.0691128	0.2497497	3.1553297	0.071783	0	0	0	0	14.459848	0
ENSG00000240065.7	PSMB9	-1.66742672961847	0.532901130660589	0.00175425730435805	0.0528091204335035	60.121672	40.293925	35.02899	68.51205	54.034356	84.218819	49.517405	60.835241	205.844076	134.12973	80.618905	793.29126	332.019272
ENSG00000144852.17	NR1I2	-2.64993552807305	0.846759509045335	0.00175102915050599	0.0528091204335035	0.0505572162819	0.03870713139665	0	1.4435523	0.04728257	0.521097	16.1164040058018	0.2352638	15.696148	1.9390188	0.3679562	0.6345087	4.097314637189
ENSG00000204277.1	LINC01993	-1.93178421014962	0.61733996404898	0.00175279097832926	0.0528091204335035	0.0183821	0.0532803	0	0.0430296	0	0.0289782	0.0290097	0.144865	0.193903	0.191562	0.0500734	0.0694233	0.176741
ENSG00000162374.16	ELAVL4	2.06413285845581	0.660205609575139	0.00176900486124726	0.0530123926342786	2.4877767	0.9734081	3.88186034743	0.277009	0.026908594	0.1572943	0.24911	0.2302539	0.18827205	0.2416505	0.26569830823858	0.4295271	0.114609
ENSG00000160336.14	ZNF761	-1.26370306869126	0.404203305641016	0.00176957916006927	0.0530123926342786	5.018046	4.883195	4.7025600671055	4.39165	6.514679	4.936069912	25.156353	5.686431	10.0990156764	11.179316	5.225082	17.914041	17.471459
ENSG00000137267.5	TUBB2A	1.58664035937674	0.507455603559297	0.00176805190631878	0.0530123926342786	51.0068	170.28017	56.52097	47.578084	235.61032	53.74841	41.82863	35.225158	13.29971	55.29079	54.695507	26.69411	10.5147
ENSG00000170881.4	RNF139	0.788885436779637	0.25228368550198	0.00176613375151843	0.0530123926342786	21.509	31.7017	20.801567	9.12361	24.519	17.498487	8.51045	16.9437	16.7324	13.863999	14.6435	11.5112	10.2765
ENSG00000072210.18	ALDH3A2	1.26458510742561	0.404646483796353	0.00177708219263953	0.0531727918462697	39.746845	31.4305830472	32.112869	64.819177	62.255125	147.934814	30.730567	37.498843	28.58262	15.1111815	30.813499	25.8927974	27.361028
ENSG00000101189.6	MRGBP	-0.886418131207805	0.283727724578064	0.00178297824458215	0.053255952339197	10.239	4.68454	7.67372	6.60726	5.95661	7.61284	10.9703	8.07433	16.4888	17.6036	8.68087	28.9788	12.4334
ENSG00000183918.16	SH2D1A	-2.17827475388733	0.697354511231444	0.001786372994941	0.053255952339197	0.960454	0.2475435	0.389566	2.276034	0.712512	1.5816261	0.440615	1.664852	1.62	10.063739	1.92683	5.051332	28.0094102
ENSG00000243199.1	AC115223.1	0.641133698950999	0.205275714460282	0.00178847025232866	0.053255952339197	22.851	26.0601	22.2962	17.6477	19.3196	21.4779	11.1639	23.2905	14.3756	19.3042	15.9834	10.2207	11.9108
ENSG00000184887.13	BTBD6	0.698678544069264	0.22366628294958	0.0017855940853151	0.053255952339197	39.112728	34.19297	36.2129	34.004	59.1284	35.8963247	20.941479	38.865574	27.03749	26.6887765	33.403448	19.412028	21.549453
ENSG00000103489.11	XYLT1	1.44533198540375	0.463255562995268	0.00180884667762321	0.0537819924646704	4.8705179	6.795739	11.5869793	2.0767829	10.428336	2.401989	2.14033	2.90574	5.035423	0.93491	3.12154	1.540029	0.999954
ENSG00000144031.11	ANKRD53	1.74704602220965	0.560041072556704	0.00181160570637163	0.0537819924646704	5.505651	5.00783700224028	4.633131	1.750071	5.74354	0.949752	0.615875	2.70034300073611	1.1943937	0.91042696	1.677529	0.0595408	0.6272676
ENSG00000187091.13	PLCD1	0.917687532275361	0.294194226484066	0.00181265636352941	0.0537819924646704	16.624239	13.1381604433	15.331711	11.553642	10.422806	21.487182	7.1503525	13.347484	7.497631	5.635523	12.930012	5.201617	6.76499
ENSG00000175984.14	DENND2C	1.87917815158136	0.602626267432961	0.00181888677363542	0.053837743078479	2.3207523	5.313081	2.746917	1.352225	1.985617	16.40336	2.141193	2.47668100161238	1.016966	0.865882	1.612997	0.30417243	0.3392203
ENSG00000272356.1	AL080317.3	-0.720257585700249	0.230956120283975	0.00181718264067437	0.053837743078479	0.768065	0.50972	0.585486	0.626586	0.446874	0.746139	0.997919	0.908829	1.64527	1.36168	0.691833	1.05784	1.17761
ENSG00000176871.8	WSB2	0.819119612373329	0.262814230437767	0.0018287223711883	0.0540641996117736	45.478143	86.654626	40.013801	30.388376	60.635828	46.360964	25.757567	40.53793	36.992333	31.752532	38.738671	23.882579	25.711171
ENSG00000160932.10	LY6E	-1.02337749545788	0.32858377578342	0.00184250635065217	0.0540840090710416	206.480466	93.526874	95.783767	122.4216407135	156.936901	215.364108	306.769126	206.926812	415.472541	313.552615141613	210.989648	724.6251623783	229.145135
ENSG00000169252.5	ADRB2	1.41963206258451	0.455672814103098	0.00183656018419369	0.0540840090710416	2.86695	2.09602	5.43165	2.51517	3.98696	5.66627	1.13725	3.00715	0.430898	1.85708	1.60409	0.365637	1.57713
ENSG00000196950.13	SLC39A10	-1.19799758660604	0.384590356179097	0.0018394713600357	0.0540840090710416	5.280012	2.603714	2.345587	3.314328	4.256595	4.4700702	3.715037	6.212916	15.6533675	7.099114	4.319517	13.722764	18.09186
ENSG00000133065.10	SLC41A1	1.45651451728841	0.467643814756448	0.00184206402713152	0.0540840090710416	17.904504	56.843178	23.920568	6.8607521	36.6041852	5.387124	5.220445	12.403926	10.916955	8.610635	9.909998	14.456705	4.4180471
ENSG00000278698.1	AL162574.2	-2.78807983257523	0.895077269150029	0.00184004738757297	0.0540840090710416	0	0.106415	0	0	0	0	0.0866826	0	2.96602	0.860996	0.299767	0.105174	0.175426
ENSG00000106689.10	LHX2	-2.31342631858641	0.742371873428419	0.00183158575366555	0.0540840090710416	0	0	0.0955888	0	0.132319	0.0372579	0.1459968	0.0464793	0.1278113	0.307413	0.1645151	0.491635	0.8602144
ENSG00000236914.3	LINC01852	1.74423218646776	0.560208307906315	0.00184856095685885	0.0541974417979529	2.604699	7.47107	2.007181	1.153059	8.834692	0.899207	0.155039	1.58112	1.558112	1.109994	2.028093	0.817765	0.773218
ENSG00000261211.1	AL031123.2	-2.09810213322497	0.674045839869178	0.00185384685294789	0.0542239247945575	0.0482466	0.0310742	0	0.250975	0.0301987	0.17743	0.60913	0.126731	1.60369	0.782063	0.204433	0.500909	0.270626
ENSG00000267892.1	AC022144.1	-1.98376280952525	0.637282835949337	0.00185293186024797	0.0542239247945575	0.582668	0.140804	0.0738198	0.710332	0.477575	0.63255	3.79279	0.215357	0.699142	4.746	0.859928	5.20406	1.0496
ENSG00000197953.5	AADACL2	2.71686227012853	0.873030610042185	0.00185830979828616	0.0542262688190933	0.195241	0.188736	0	0	0.2387009	0.2345111	0.0308091	0.0384894	0	0	0	0	0
ENSG00000078043.15	PIAS2	0.881186763993073	0.283157605005497	0.00185823838384055	0.0542262688190933	7.696221	9.938907	7.619177	3.5767543	6.2280731871	4.3739037	2.3090958	6.716088	3.5273152	3.571039	4.9379567	2.749414	3.0954744
ENSG00000255422.3	AP002954.1	-2.32438487840142	0.747008002559065	0.00186080845920525	0.0542352241731847	0.0702733	0	0.0712882	0	0.2054176	0.0556543	0.351323	0.0693312	0.135163	0.366636	0.446964	0.401162	1.46061
ENSG00000162222.13	TTC9C	-0.824629252635292	0.265133670290877	0.00186935611873922	0.0543866777349649	30.128212	7.76703	21.53494	16.80162	18.315106	21.19346	25.910425	25.796893	36.281352	44.715359	35.494042	51.890205	41.57375
ENSG00000145916.18	RMND5B	0.649101446163961	0.20870928090197	0.00187040059617923	0.0543866777349649	29.91668	26.000671	29.068619	19.3100488	22.835729	43.812349	15.1193	25.66431	18.064823	19.0444369	21.684371	25.210094	15.2015604
ENSG00000169762.16	TAPT1	0.610746144564025	0.196439614387972	0.00187671968451967	0.0545063715885438	20.515423	16.4915261	20.9414217	13.1522501	11.995851	13.1780155964	8.785012	16.064562	10.2650203	15.213529	11.108664	8.153932	9.68076360553088
ENSG00000186074.18	CD300LF	-1.63382889667499	0.525650499484696	0.0018822819922795	0.0546038310655992	1.680007	0.717552	0.586155	1.438089	2.64577	2.115817	2.702937132615	1.243085602568	3.024234	8.940101	2.806163	8.608234	13.430014
ENSG00000158195.10	WASF2	0.697760032838135	0.22452834660181	0.00188568424182397	0.0546384737282603	60.1511	41.7191	56.1634	35.3563	40.558326	61.3309324	27.5712	57.6115	32.7847	24.1361	34.6468	31.7233	22.5404
ENSG00000138678.10	GPAT3	1.66954742348079	0.537343722726078	0.00188972036966682	0.0546913807571993	6.665922	9.3744560045025	3.6774681	3.65456	22.1178590394757	2.4158933918	4.465879	2.63674400179263	2.656299	2.0730567	2.237216000291	0.51466412	1.7967216
ENSG00000106278.11	PTPRZ1	2.14180938898611	0.689438417255377	0.00189252285011813	0.0547085022502023	3.957078	4.1607839	6.648553	11.427009	0.4861302	15.729567	3.0530966	2.172998	0.138977	0.6830277	2.19365	0.3092416	0.1839702
ENSG00000138663.8	COPS4	0.860538638610861	0.277188340605349	0.00190583645821972	0.0549220337436586	37.432749	33.894236	34.6831257	14.0347813	28.942358	25.213025	9.9943469	31.162186	18.0556983	13.596165	23.090875	13.3394207	11.7323793
ENSG00000147592.8	LACTB2	-1.22005937602187	0.393039463063929	0.00190816831438915	0.0549220337436586	10.32925	8.35239	8.25852	6.761657	9.26976	12.207853	15.18554	10.511966	22.066926	21.199738	16.144091	76.582407	16.364378
ENSG00000183763.8	TRAIP	-1.6132326451303	0.519579417185793	0.00190355115721831	0.0549220337436586	1.476313	0.668535	1.2319075845512	3.321027	0.4838656	2.99143	4.490132	1.351501774	6.586975	6.013024	4.072197	13.2665207	9.873809
ENSG00000280020.1	AC116407.3	-1.18360726054917	0.381308286293219	0.00190878759424314	0.0549220337436586	0.432755	0.475521	0.531532	0.7838024	0.202281	0.357173	1.45104	0.808829	1.123047	1.71043	0.835378	1.13712	1.42807
ENSG00000255154.7	HTD2	1.04482844957684	0.336695002414285	0.00191446908082117	0.0549948546068325	4.677342	3.592305	5.32826	1.85312	4.908834	5.838714	1.441245	2.59793542	2.878198	0.904999	2.417046	4.322425	1.59528
ENSG00000186575.17	NF2	0.583524483799273	0.188052345896661	0.00191576337325074	0.0549948546068325	7.529458085	8.776172	7.8267693	4.7470224	7.8892591	8.7056962	3.1632092	6.9576798	6.6921177	4.6038849	6.5096274	6.183363	5.1161504
ENSG00000253636.1	AC022893.1	1.97791245722902	0.637605387411094	0.00192156309196204	0.0550000934748483	5.19227	2.13113	1.26171	0.433251	0.112729	0.177371	0.177622	0.768632	0.244594	0.26062	0.476894	0.0991308	0.21646
ENSG00000011114.14	BTBD7	0.478485135136039	0.154226885229253	0.00191909422791963	0.0550000934748483	9.315402	8.401689	9.763386	7.87892000068586	9.3083809	8.786182	6.049284	8.8121497	8.662403	7.423915	7.008738	4.942566	6.0313799
ENSG00000189337.16	KAZN	1.51732708221274	0.489155318133103	0.00192261389596863	0.0550000934748483	5.3641273	10.934596346	3.910692	3.280929	18.067963	13.3796527	2.89833	7.1963392	4.339979	3.052275	3.665384	1.1946879	1.0881494
ENSG00000196666.4	FAM180B	2.33233784348635	0.752424097474429	0.0019367427298741	0.0553402989038506	0.465321	3.0263	0.300168	0.0990127	4.11828	0.066834	0.0333758	0.417006	0.121859	0.110276	0.576328	0.0801687	0.067717
ENSG00000213694.4	S1PR3	2.27840346445079	0.735134342990931	0.00193977073008832	0.0553628912526362	43.4618172	175.19666182	37.29590947	3.4322819446263	51.2936888572472	3.0303398177725	0.651511410596702	22.1753991	6.2402326361822	8.3118142	18.597897	1.01668210022897	1.578841203354
ENSG00000181873.12	IBA57	1.15683943024149	0.373361328879329	0.00194539273342708	0.0554050919348607	2.077822	2.9041437	6.853272	1.6733	3.7311247	2.9272	1.6621487	2.209845661	2.295026	1.1692156	1.81839715	0.628088	1.1809967
ENSG00000166984.11	TCP10L2	-2.82774864093028	0.912750272895491	0.00194796645719656	0.0554050919348607	0	0	0	0.0197546	0	0	0.0815172	0.5179846	1.665543	0	0.187912	0	0.1852935
ENSG00000275993.2	SIK1B	1.74853169422896	0.564349843447987	0.00194626641185624	0.0554050919348607	127.611184	16.9927	37.20795	11.459061	83.372016	33.897441	13.669776	9.253155	9.23142	36.8451	1.58926	13.918157	12.8496899
ENSG00000123444.13	KBTBD4	0.695667997772727	0.224823312599431	0.00197286112009336	0.0557925124762402	12.008282	9.10003	14.05356829512	5.245462	6.751083	8.308688	4.11142913	9.5870036	7.463595	5.441855281	6.4362514	5.265567	4.826837724
ENSG00000187595.16	ZNF385C	-1.07476383456835	0.347319958922943	0.00197178955819211	0.0557925124762402	0.419943	0.331661	0.3390990004	0.3109600136555	0.3469406	0.354595	1.1476796	0.38753	0.9640005503	0.676258	0.4282441	1.2686656	0.857941571592
ENSG00000137968.16	SLC44A5	-2.22378689340466	0.718563400024994	0.00196967012288105	0.0557925124762402	0.2957132	0.2867726	0.2408904	0.092919	0.102162	0.0214264	0.4158822	0.2094158	2.59538	2.789536	0.1683537	0.0225418	2.312767
ENSG00000158486.13	DNAH3	-1.98640039741431	0.6417579722473	0.00196648069110591	0.0557925124762402	0.71425915	0.0338009	0.15210371	0.40989201	0.130948	0.4079323	3.8333432	0.16954276	1.8710705	0.6118996	0.6430231705	2.1631401	0.95735042
ENSG00000176407.17	KCMF1	0.73617323307838	0.237903016403276	0.00197194249461436	0.0557925124762402	35.68312	59.780804	44.393518	19.451629	40.37622	45.868929	15.803686	32.124953	31.673241	24.293715	28.335847	35.04967	23.192784
ENSG00000125823.12	CSTL1	-2.67201419299844	0.863810215807718	0.00197951605973361	0.0558097746890604	0	0	0	0.126237	0	0.144777	1.810128	0	0.806125	0.163089	0.441877	2.530202	0.128918
ENSG00000269155.2	AL009178.2	-1.79487093241329	0.580267150771246	0.00198023771173954	0.0558097746890604	0.223951	0.0963834	0.121275	0.0501298	0.187235	0.0328661	0.508289	0.235854	1.42948	0.864845	0.277644	0.207257	0.0799219
ENSG00000126337.13	KRT36	-2.61548198859622	0.845492463174547	0.00197849149332359	0.0558097746890604	0	0	0	0	0.0326066	0.0274739	0.0549201	0	0.0668097	0.272128	0.0316077	0.230588	0.41798
ENSG00000109047.7	RCVRN	1.93999105877624	0.627374551565777	0.00198653902170549	0.0559236724597295	0.296094	1.815302	0.62932	0.153953	3.305073	0.156748	0.3113697	0.292378	0.380248	0.171753	0.2691419	0.2829075	0.0922475
ENSG00000157399.14	ARSE	-2.32449567061453	0.751925805347074	0.00199221999614196	0.0559562812764276	0.928542	0.205682	1.453732	2.398707	0.256485	1.486246	12.6845741	1.159264	21.773521	10.690225	0.783234	0.0575146	18.001318
ENSG00000101882.9	NKAP	-0.565227313959725	0.182830246675309	0.00199120077195068	0.0559562812764276	6.122277	4.2140617	6.015574	4.724546	4.495336	4.487718	6.27783	5.940925	8.78395	7.719479	6.487915	11.520334	9.9405
ENSG00000172977.12	KAT5	0.657778713109122	0.212856831630937	0.00199994762805297	0.0560460974588569	52.605594	58.38951075802	62.089961	34.259524	30.8326790057691	36.12521	25.1006956	47.04911752	34.555856	27.536636657184	35.458701	25.846966	23.77802
ENSG00000160888.6	IER2	1.17949853045747	0.381671310740722	0.00199919707288669	0.0560460974588569	213.0255	118.43866	176.22011	51.34024	279.91836	195.136736	50.84896	57.211461	83.61593	125.705601	34.34978	149.7885	68.845119
ENSG00000107968.9	MAP3K8	1.63634344017806	0.529729436891661	0.00200819687000924	0.0561500921450607	37.498175	197.055685	42.044763	12.311549	74.03679	21.430312	7.246626	26.342878	30.11259	31.324814	10.889864	15.010219	25.567343
ENSG00000279699.1	AC004264.2	2.10937348889396	0.682795670525523	0.00200616053021554	0.0561500921450607	0.359668	0.221218	1.09351	0.0765345	0.367693	0.877424	0	0.322232	0.12552	0.056811	0.0593891	0.185629	0
ENSG00000116833.13	NR5A2	-1.57194396697232	0.509004272276334	0.00201323678576821	0.0562274765957498	1.4722757	0.5091946	0.990272	0.2916421	1.323529	0.5107752	3.1447688	2.4132167	4.148064	1.8805377	0.2386392	6.213059	2.845977
ENSG00000154710.17	RABGEF1	1.16967273880141	0.378979011620737	0.00202610613430448	0.056520369311119	32.335084	70.468691	23.544822	9.2943654	35.62124	17.611631	9.215761	18.163044	17.857176	13.299883	16.341413	21.499703553669	9.107778418945
ENSG00000283064.1	AL353759.1	-1.75180611429518	0.567651702514474	0.00202829209732365	0.056520369311119	0.182348	0.117138	0.0625075	0.382001	0.0683236	0.269368	1.05986	0.28756	0.385087	2.22186	0.4413	0.724982	0.415871
ENSG00000087586.17	AURKA	-1.93072508361067	0.625756401314956	0.00203260781808984	0.056576918401162	2.2715751791	0.430171	1.577815	5.2213620531427	1.55903230025409	9.483591	10.3519070013807	1.616418	16.7125390297149	21.3359350216006	9.02244990134674	48.3219200008728	23.3928690126439
ENSG00000109445.10	ZNF330	1.12856693213273	0.365834454290302	0.00203612697757306	0.0566111933258936	38.947827	76.87282	53.285709	17.306701	41.361108	21.521748	11.648835	34.413766	18.124593	17.666348	29.54985	11.940116	17.296945
ENSG00000152092.15	ASTN1	2.36861010827074	0.767921902854	0.00203934781338754	0.0566371062202859	0.958807	0.3347775	0.987586	0.2061426	0.320991	0.0686639	0.0229376	0.186061	0.013928567105	0.0189269	0.1876007	0	0
ENSG00000124212.5	PTGIS	2.30486620994287	0.74734752502118	0.00204194938065745	0.056645781865884	43.7491965	44.9981656	22.1645841	1.3196	84.1378	1.33923	0.250677	15.1181	4.50449	7.3251424	5.44598	0.2508423	2.39652
ENSG00000125743.10	SNRPD2	-0.855461395218545	0.277481622758463	0.00204961012482759	0.0567946277030893	238.621005	235.78897	216.586611	225.815676	175.564236	248.657171	429.941985	282.291195	368.872815	411.53925	301.474951	544.275824	741.947349
ENSG00000117481.10	NSUN4	0.61153559144406	0.198407984102586	0.00205468022862857	0.0568078907904068	10.600118	13.206351	11.3193501	7.499372	12.153577	11.5420812	7.582411	9.771165	10.3759104	7.7561888746	7.801623	7.8170204	4.4973434
ENSG00000264608.1	AC005726.3	-1.40747704896141	0.45663990701832	0.00205444189158663	0.0568078907904068	3.10527	1.88178	1.97492	5.14589	5.18464	2.17602	19.746	4.41965	6.01271	9.81718	6.53737	11.827	8.80213
ENSG00000272807.1	AC007038.2	-0.698396929871438	0.226735812361389	0.00206845458434892	0.0571248980911988	2.13979	1.62075	2.45522	2.46716	1.90499	1.69812	3.00844	3.21463	3.31438	3.80415	2.95945	5.59464	3.93771
ENSG00000263680.2	AC007639.1	-2.27525946715072	0.73877132976349	0.00207147618272515	0.0571445687196586	0	0	0	0.123826	0	0.125823	0.500855	0.0783284	0.229102	0.276128	0.216384	0.90737	0.570823
ENSG00000073067.13	CYP2W1	-2.4013466962223	0.779970708043785	0.00207860413056585	0.057226511385799	0.023256	0	0.0484033	0.5034753	0.0448129	1.155072	2.254146	0.417791	1.775232	7.321299	1.654769	1.046159	5.96031
ENSG00000127928.12	GNGT1	-2.81822705116849	0.915494189907715	0.00208138453211635	0.057226511385799	0	0	0	0	0	0	0	0.3219319	0.367745	0.0751381	0.3528642	0	0.7293821
ENSG00000151014.5	NOCT	1.46051170916983	0.474426702197352	0.00208061562763072	0.057226511385799	2.974347	13.088631	3.299921	2.755076	17.273972	3.03648	1.767684	3.338823	2.553787	3.96976	1.863478	2.392021	2.964932
ENSG00000163507.13	CIP2A	-1.47046605626733	0.47786737933432	0.00208995314359413	0.0573346901754287	0.95722538953	0.9690999	1.143822	1.5528203	0.625589	2.6888293	2.43909426695	1.23818432471606	2.6758161	5.2350497	2.688916745647	11.4124153	5.9805024
ENSG00000158874.11	APOA2	-2.73716407516949	0.889466255604978	0.00208877421163224	0.0573346901754287	0	0.0668586	0	0	0.193509	0	1.29845	0.2525939	6.444528	0.518619	0.0627976	0	29.748888
ENSG00000104537.16	ANXA13	-2.55566480439832	0.830693441322142	0.00209415493054833	0.0573823308929717	1.62368	0.957077	1.24439	0.15449	0	0.0312763	28.036865	1.132045	15.774268	1.244605	2.038276	1.757444	0.1387679
ENSG00000265393.1	AC084125.4	-1.49701165269527	0.486637658664373	0.00209632762688407	0.0573823308929717	2.93148	1.00563	1.40826	1.73128	0.947343	1.67125	1.6403	3.76368	5.60874	6.33083	2.26041	4.92214	12.2846
ENSG00000224533.4	TMLHE-AS1	-1.51270429009877	0.491807153703222	0.00209933106656522	0.057401046676416	0.13474	0.0878481	0.136437	0.105143	0.0940571	0.290508	0.475198	0.170296	0.387233	0.483175	0.199657	1.18316	0.540228
ENSG00000233017.2	AL121832.1	-2.56061374166825	0.832681431955698	0.00210402270259763	0.0574658297745898	0	0	0	0.337541	0	0.2295022	0.910775	0	5.004945	2.928659	0.524954	0.277469	0.967036
ENSG00000077152.10	UBE2T	-1.72704607275282	0.561715283306019	0.00210789746184043	0.0575081837852716	3.345562	0.788655078526	2.6031653	11.663484257	1.96962	13.567192	21.861419402858	7.962294	28.761706	18.2503576	23.092536104367	48.51414	25.163861
ENSG00000177363.4	LRRN4CL	2.17595906596759	0.708243525572229	0.00212393534288824	0.0578233820300862	21.5987	20.684	10.3968	1.33179	51.113	1.34568	0.498813	11.4799	3.86011	2.47059	3.50155	0.955367	0.287141
ENSG00000235381.1	AL596202.1	-1.12388492303638	0.365811613717091	0.0021241242378399	0.0578233820300862	0.794502	0.25219	0.653144	0.520377	0.0676308	0.494193	0.836691	0.925042	1.33636	1.31687	0.90764	1.18823	1.33625
ENSG00000229167.1	AC114488.1	-1.76673569202957	0.575464027650776	0.00213982651751316	0.0581868210723772	0.513813	0.124406	1.17449	0.500846	0.119077	0.204534	1.92451	0.761664	3.71743	0.559235	1.75201	3.32729	0.71693
ENSG00000062822.13	POLD1	-1.25167680126825	0.407855988421477	0.0021483516777068	0.0583545140119153	9.212153443275	7.349418	6.5493181	19.85459341	5.374505825	14.853966077	28.9362360028843	14.522516	35.2195262933	32.3590848586692	12.6110753	40.719181	40.8780511
ENSG00000178965.13	ERICH3	2.24557992483592	0.731924220260925	0.00215460740659522	0.0584602634607443	0.1958347	0.1117355	0.198353	0.3483774	0	0.0536953	0.00813337	0.0507552	0.00987957	0.00894911	0.0374321	0	0.049568
ENSG00000163145.12	C1QTNF7	2.2972684502438	0.748942688430445	0.00215966694681589	0.0584693201301523	44.576369	32.684479	18.695545	2.216794	2.202976	2.29546604	1.038295	5.040765	1.09396800114408	3.0128561788	6.351864	0.1070987117157	0.066124909356
ENSG00000163586.9	FABP1	-2.78300341020709	0.90726356813731	0.00215879421136394	0.0584693201301523	0.141456	0	0.8888968	8.211188	0.392827	1.01477	39.452512	0.6082268	41.374165	54.530628	0.257304	0	309.597285
ENSG00000261716.2	HIST2H2BC	-1.07214430361795	0.349635901912523	0.0021661021148597	0.0585794500898395	1.96991	1.13102	1.56532	1.557233	0.697012	1.377151	2.80768	1.32358	2.23334	4.93664	1.994303	5.60329	3.69004
ENSG00000173227.13	SYT12	2.20085826015991	0.71834024157415	0.00218537407496674	0.0590361151583538	0.04341155	0.6114356	0.3555293193284	0.1362056	3.6630649	0.5930915	0.1867252	0.033901033178	0.1166429	0.0503429	0.22662624	0.4425294	0.0550832
ENSG00000237977.1	EIF4HP2	-1.31492665658696	0.429310852632998	0.00219219599705449	0.0591037237508536	1.38345	0.536066	0.562334	0.970903	0.384318	0.661449	2.50897	0.683798	2.9376	2.7713	1.63561	1.46196	2.75648
ENSG00000257893.2	LINC02404	-2.80548949434186	0.915983910097145	0.00219265380494175	0.0591037237508536	0.0508643	0	0	0.0396834	0	0.0402129	2.4078	0	0	2.34307	0.0462038	1.97867	0
ENSG00000268401.1	AC007785.3	-2.11338639104763	0.690542923897139	0.00220989376267016	0.059329271063469	0.44979	0.141424	0	0.12308	0.270108	0.232793	1.300763	1.057526	0.868798	0.127156	0.276362	1.005992	2.88858
ENSG00000129315.10	CCNT1	0.603497127805282	0.197140608562082	0.0022041333021814	0.059329271063469	9.19363	11.521347	10.648176	5.427369	10.446074	6.3724253	5.649142	6.914273	6.541026	6.16585	5.0890761	8.864282	5.554671
ENSG00000277692.1	AL121583.1	-1.45238087799952	0.474576358758909	0.00221061175673948	0.059329271063469	1.14643	0.605337	0.740708	0.487695	0.0968791	0.331174	2.46578	2.36725	1.60654	0.816259	1.0421	1.09606	2.74521
ENSG00000214013.9	GANC	0.795786427185842	0.2599813583616	0.00220645889265309	0.059329271063469	10.021502	16.286966	10.363519	6.493972	7.620520889	9.425549	2.940814	10.252333	6.99496978	6.789845	6.880042	5.4634385	5.4231358
ENSG00000091138.12	SLC26A3	-2.73274822908819	0.89385343492251	0.00223365535345399	0.0593896100754642	0	0	0.133834	0	0.0196333	0.0297522	1.80188	0.130138	0.470485	0.622183	0	0	1.6462339
ENSG00000151117.8	TMEM86A	-1.52433273840639	0.49887669826623	0.00224663095039705	0.0593896100754642	2.146424	0.449454	1.38911	1.33689	1.66728	1.03812	1.26801	1.825064	2.714047	3.08482	2.81801	15.762975	5.645428
ENSG00000223749.9	MIR503HG	-1.35663557764104	0.443639256651572	0.00222841816938861	0.0593896100754642	4.729695	1.607828	1.944178	1.9434418	5.839725	1.442821	3.65232	8.56979	14.75475	8.182426	6.74188	3.163646	14.78908
ENSG00000113396.12	SLC27A6	2.29147618677405	0.750093542099797	0.00225120138954073	0.0593896100754642	0.480002	0.281385	1.0466408	0.837778	0.306552	4.13722	0.082069	0.961838	0.0791286	0.0541972	0.0755543	0	0.0657077
ENSG00000245149.3	RNF139-AS1	-1.02465019159098	0.335000135601932	0.00222332251091375	0.0593896100754642	2.182333	1.4634566	1.182256	2.041458	1.287267	2.052792	2.385041	1.85566	6.048715	5.277375	2.6941415	3.040712	6.0389072
ENSG00000137944.17	KYAT3	0.771540335824427	0.252284992723068	0.00222663925212246	0.0593896100754642	18.405695	35.00876	27.438961	20.65484	14.519722	23.131061	9.439962	21.2035197012	14.029033	12.628666	16.73501	21.6717	10.13286
ENSG00000161653.10	NAGS	-1.57799597890471	0.515854501629217	0.00222081377102988	0.0593896100754642	0.257722	0.221394	0.368818	0.419329	0.30868	0.849116	0.705235	2.238875	1.171845	1.1934855175	0.6674811	4.92607	0.3826479130324
ENSG00000227388.2	AL133410.1	-1.52525956031494	0.499225334371011	0.00224870951970508	0.0593896100754642	1.435046	0.676499	1.272291	2.525292	0.134287	1.03211	4.724514	1.668346	8.69907	3.753331	3.9071	4.220184	1.928948
ENSG00000196850.5	PPTC7	0.997934005534366	0.326699497099226	0.00225366109763026	0.0593896100754642	12.0823	34.2034	24.1782	8.8228	24.6909	11.6436526	6.34683	13.6023	8.70855	11.7188	8.46757	14.9419	9.9807316
ENSG00000279048.1	AC080080.1	-1.52618486709592	0.499048366416535	0.00222678126786203	0.0593896100754642	0.135828	0.153121	0.0229364	0.282619	0.0212387	0.24991	0.303667	0.356853	0.716559	0.589848	0.267236	0.855511	0.58032
ENSG00000285492.1	AL356417.3	-2.56679540805473	0.83961906881985	0.00223493297602061	0.0593896100754642	0.00401902	0	0.00814008	0	0.0151143	0.00316367	0	0.00395744	0.0192549	0.0383784	0.33567834	0.0340781	0.205235
ENSG00000215866.7	LINC01356	-2.22293088607375	0.727377111478959	0.00224242937372535	0.0593896100754642	0.301805	0	0	0.0636677	0.186133	0	0.4143971	0.111706	0.341939	0.1741922	1.307879	1.207095	0.438712
ENSG00000145283.7	SLC10A6	1.96120512631847	0.641237203194926	0.00222469915910087	0.0593896100754642	0.810564	0.522366	0.430354	0.150576	2.71103	3.71866	0.0913627	0.3787037	0.555835	0.884974	0.1743078	0.182772	0.0926974
ENSG00000169087.10	HSPBAP1	-0.561479168195715	0.183691516178942	0.00223831575540374	0.0593896100754642	8.283673	5.329271	7.578787	8.779188	5.5555	5.497974	9.86358	11.694801	9.499499	11.305472	9.77048	12.498364	12.373193
ENSG00000072134.15	EPN2	1.17656149416644	0.384966497506002	0.0022410946894071	0.0593896100754642	34.4338011	45.1691211	23.9533316	8.1270696	15.570158776233	28.8780940007868	8.379192	25.776385	10.1647912848	9.8088568	14.189315501598	7.004035883	9.1243458
ENSG00000149948.13	HMGA2	-1.96828959885663	0.644272505860731	0.00225017321617119	0.0593896100754642	0.1900606	0.1266552	0.2463453	1.370353	0.5085119	0.2221695	0.8187281	0.53767915	5.0399613	2.4390668	0.28461206	3.0412719	5.7220694
ENSG00000251138.6	AC090502.1	-2.78294520386016	0.911062486736551	0.00225349546113316	0.0593896100754642	0	0	0	0	0	0	0.482437	0	0.978438	0.29466	0.367414	0.272687	0
ENSG00000259840.1	Z97653.1	2.10453123053483	0.689494668389154	0.00227109655259883	0.0597839902341462	0.609952	0.591513	1.24174	0.317119	0.187164	1.30364	0.160379	0.402715	0.196938	0.177352	0.185139	0	0
ENSG00000109193.11	SULT1E1	-2.66852442907617	0.874361686470049	0.00227345867085599	0.0597839902341462	0	0	0	0.248173	0.0298102	0.586754	1.55695	0	2.58576	8.341569	5.17608	0.400317	3.50496
ENSG00000256039.1	LINC02446	-2.47044392605575	0.809623539697518	0.002278156532747	0.0598439314255037	0.451296	0	0.228931	2.34688	0.63133	1.1323	0.355982	1.03904	1.66411	10.0732	0.546776	8.66507	41.0578
ENSG00000143398.19	PIP5K1A	0.644551142952121	0.211284685569249	0.00228362723531975	0.0599240253849281	33.8808467	36.961961	37.161548	20.423309	50.355327	26.5968845	16.152979	31.4314787	28.377938	26.94440219	25.83899138768	21.281206	18.6669381002173
ENSG00000283849.1	AC092053.2	1.9614210100392	0.64330548436491	0.00229625168599007	0.0601914703070173	0.248482	0.780664	0.440743	0.0727037	0.291176	0.0490221	0.0245076	0.0306087	0.179074	0.134912	0.0283064	0.0294364	0.0994917
ENSG00000198130.15	HIBCH	0.716685303757614	0.235083062400584	0.00229874317263652	0.0601930156686674	22.316728	15.6192575	23.66812	13.056605	16.1455662	34.146806	11.380717	17.48044	14.4704	12.457498	14.391117	17.199562	9.756552
ENSG00000274508.1	AC007336.2	-2.68840734205075	0.882486685088415	0.00231599586718304	0.0604762277752426	0	0	0	0	0.130222	0	0.110914	0	0.271568	1.22519	0.127931	0.811069	1.34517
ENSG00000114859.15	CLCN2	-0.828776972841539	0.272027676842376	0.00231396089107183	0.0604762277752426	5.696630791308	3.8389475	4.0234699	4.0390962	1.642413026	3.0591634	7.2893191825	4.61752863685665	6.932356	8.2435791	6.27777845	11.077761	5.82297
ENSG00000217644.5	AL355864.1	-2.38237773351379	0.782060352860651	0.00231689084384441	0.0604762277752426	0.153998	0	0	0.120073	0.142367	0	0.242838	0.609212	0.595042	1.8785	0	0.593043	0.245315
ENSG00000129596.4	CDO1	2.35034033173025	0.771645514035128	0.00231999714573025	0.060493497756686	13.628361	4.928119	4.928846	0.8288127	49.349867	0.3365497	0.1763365	4.264145	1.1961915	1.15717	4.479696	0.0859064	0.606112
ENSG00000095713.13	CRTAC1	2.14295506311592	0.704030357147811	0.00233580103416896	0.0606097245301265	1.43857	1.62423792	2.255677	0.380426	3.060635	2.767099	0.0601131	0.425361	0.286659	0.1823032	1.447545381	0	0.0406819
ENSG00000104112.8	SCG3	1.89299707282943	0.621983487956692	0.00233855527904685	0.0606097245301265	1.0487	0.436436	1.138382	2.277252	0.5677523	0.114429	0.40739	0.605409	0.270167	0.0627873	0.0585971	0.0725958	0.0820262
ENSG00000168994.13	PXDC1	1.52633621774798	0.50149820341727	0.00233802475995805	0.0606097245301265	71.662875	210.79799	57.548564	19.70701	154.337129	18.035	19.362517	48.466657	20.03314	37.02089	39.166038	36.82645	18.803758
ENSG00000145692.14	BHMT	1.46094336739015	0.479830230517315	0.0023290562933795	0.0606097245301265	1.66665	1.154206	1.48537	1.704171	1.090069	0.4049139	0.6287099	0.906181	0.094685	0.3036158	0.570438	0.0939111	0.3276284
ENSG00000129250.11	KIF1C	1.03346825937041	0.339447492560898	0.00233020941498761	0.0606097245301265	83.500422	96.191592	103.33335	44.677589	55.895722	62.843801	22.350815	59.18895	32.67292	30.628716	66.848051	49.76209	12.654159
ENSG00000134480.14	CCNH	0.858320095353718	0.282025986013931	0.00233915081536758	0.0606097245301265	44.7420972	62.722143	32.010272	20.87808508477	62.509789	23.886831	19.5222689	27.518827	27.8507180022287	25.165626	28.081603	20.433692	22.370679
ENSG00000133216.16	EPHB2	-1.78364066950406	0.586148533151106	0.00234244705790981	0.060631644820061	1.3289126	0.87238802	0.600042	1.7645865	3.65174	0.7036462	2.2677113	1.713796	24.973917	1.9300616	3.4027634	11.175547	4.6989409
ENSG00000140153.17	WDR20	0.501581499941719	0.16487334452057	0.00234837756104283	0.0607216329655222	12.9895200032273	9.631669	11.41496374	8.477353	14.922986	12.542037922	5.789625	10.6513713318284	11.432118015285	9.385684766	9.54747359573	8.0806638	8.707789
ENSG00000167751.12	KLK2	-2.81556307686583	0.925749859477293	0.00235491371067994	0.0608270770049846	0	0	0	0	0	0	0	0.283699	1.9340997	0.2882605	0	0.0322014	0.4005445
ENSG00000104983.8	CCDC61	-0.948231031192592	0.311811809969375	0.00235765409139448	0.0608343592195583	12.114106	5.230529	7.027239	12.649687	7.790902	8.764746	22.670019	12.882304	16.794222	16.917021	11.194871	27.236689	24.333175
ENSG00000181804.14	SLC9A9	1.17390414046888	0.386062142477977	0.00236018757065057	0.0608362931622379	10.13461	13.191798	5.89546	5.2877	11.847936	12.41114	1.676203	7.69064	3.05429	6.69327	6.39574	2.085683	5.0021
ENSG00000116690.12	PRG4	2.33737752806356	0.768890171066471	0.00236627795746734	0.0609298106738077	2.594001	1.7875049874132	0.853922	0.131722	17.83035205007	0.0266683	0.197744	1.66262	0.706988	0.3379561	0.558557	0.158684	0.329396
ENSG00000106341.10	PPP1R17	2.04337829358359	0.672273193088135	0.00236966611667311	0.0609536258389564	0.136500953	0.0704494	0.13865872	0.1061419	0.29634	0.114994	0.0383509	0.0957749	0.046624	0	0.0220679	0	0
ENSG00000264538.6	SUZ12P1	-0.600522038811046	0.197641188092509	0.00237801873768921	0.0609783146778441	14.845706	8.77782	14.281472	9.126369	9.124907	6.896955	9.335981	16.460717	21.74746	20.824169	17.887518	15.977194	19.42304
ENSG00000242268.2	LINC02082	2.33733367999551	0.769182909929002	0.00237583317744852	0.0609783146778441	1.08353	0.381381	0.0999962	0.537779	1.64923	0	0.155373	0.194522	0.0948713	0.0857078	0	0.0940976	0
ENSG00000093167.17	LRRFIP2	0.694051558279239	0.228379809650978	0.00237346512460349	0.0609783146778441	38.019301	66.275933	37.816997	30.077663	40.0195361	47.8048654	24.167587	39.10726788	35.180973	22.1872229	28.425576	38.819513	20.14170185
ENSG00000111011.17	RSRC2	0.461579716320844	0.151991226253046	0.00239037461226148	0.06116837619484	53.839559123216	67.333975	65.803125	42.545525	53.747539	45.420793	31.431813	50.80029	47.730922	44.9229391	35.330235198	44.660203	49.8553799
ENSG00000273218.1	AC005776.2	1.37987628595219	0.454368301138504	0.00239015677088165	0.06116837619484	2.04994	4.33404	1.78532	0.77473	3.81235	0.379181	0.707638	0.883833	0.891428	1.00173	0.901751	0.606085	0.974646
ENSG00000138435.15	CHRNA1	-2.19231704491334	0.722120638534458	0.00239784747954248	0.0612962147533871	0.0797696	0	0	0.0659397	0.0746928	0.11135278	0	0.1046251	0.6569603	0.311906	0.255820151998	0.9098865	0.631721
ENSG00000251257.2	AC010457.1	2.80667562710904	0.924587842145889	0.00240060381415807	0.0613033450787837	0.692119	11.03423	0	0	6.850441	0.435695	0	0.536391	0	0	0	0	0
ENSG00000166272.17	WBP1L	0.92299815127074	0.304107921166239	0.0024045542218552	0.0613409218760895	43.852145	50.622095	46.025654	19.0023823	40.953884	15.1395448	13.93225	30.520136	26.380486	18.664315	24.892826	16.3374191	11.7737739
ENSG00000227019.2	OR7E101P	2.56194528870837	0.844512384840684	0.00241623768438558	0.0615754907313298	0.801805	1.39868	1.12011	0.125035	0.444462	0	0	0.158626	0.309915	0	0	0	0
ENSG00000197057.9	DTHD1	-2.1919174868001	0.722645396888793	0.00241986857876878	0.0616045761127917	0.1240638	0.040365	0.0482563	0.4765049348302	0.0314587	0.2963143	0.1277018	0.53172441	0.34661202	1.514076	0.267644	1.017372	4.758445
ENSG00000249264.1	EEF1A1P9	0.960521739219814	0.316749822262458	0.00242593163526013	0.0616321132592524	0.849788	0.780416	0.904437	0.629809	0.596599	0.503509	0.0670431	0.586411	0.571171	0.406144	0.540309	0.442921	0.238073
ENSG00000139200.13	PIANP	1.75139493267935	0.577527677946926	0.002424783159286	0.0616321132592524	2.72892	1.730907	3.66593	1.486058	0.132322	0.81957472	0.29886	0.6042511	0.698257	0.4690017	1.0748034	0.0894737	0.1327393
ENSG00000185477.4	GPRIN3	-1.43629849978148	0.473759227017284	0.00243176252595014	0.0616536513367175	0.9542223	0.3076	0.409511	2.02734	0.410491	1.05069	1.97681069	1.44243	3.9832563	3.60101	1.2466879	2.8517239	4.6528
ENSG00000059378.12	PARP12	-0.965128850100244	0.318341462670405	0.00243147770989586	0.0616536513367175	29.643207	13.395495	18.735056	36.785911	22.104562	26.239758	38.303792	36.5276261	65.208750071523	55.297266	27.487387	97.921917	62.528239
ENSG00000125618.16	PAX8	-1.77633478624947	0.586182130962955	0.0024427357128265	0.0616574240240896	1.34898033321	1.708121	0.3615728	2.4126883595	0.9585089	1.9401672	3.66821020073675	2.156529284	28.0846539789911	4.42793370643782	2.56278100162809	1.66078974	5.795900675
ENSG00000138795.9	LEF1	-1.55065959293544	0.511743025234476	0.00244429991851945	0.0616574240240896	3.228634	1.1879737	1.1119916	5.83111476942	1.7121645	6.293054	2.5567684	10.4826470094356	27.447836	16.044003	14.4988149	6.284043	8.8267889
ENSG00000275880.1	AL139385.1	1.7667541047176	0.582990347927723	0.00244146614093046	0.0616574240240896	0.147237	0.301165	0.165726	0.102122	0.460781	1.4464	0.154909	0.209493	0.0627455	0.142064	0.0742718	0.185299	0.0655455
ENSG00000259381.2	AC090695.1	-1.8873945788341	0.62287285472964	0.00244436989159959	0.0616574240240896	0.147517	0	0.0498545	0.153454	0	0.155476	0.426749	0.145449	0.28341	0.470099	0.133998	0.653002	0.74757
ENSG00000268555.1	AC123912.4	2.36808880491482	0.781238127825361	0.00243584058515328	0.0616574240240896	0.462459	0.248442	0.781504	0.040089	0.961031	0.446886	0.0405402	0.304005	0	0	0.14003	0	0
ENSG00000163659.12	TIPARP	1.32548474717384	0.438003036356015	0.0024764851325318	0.0624038947092661	22.77627	20.02538	15.84493	8.86234	65.68958	30.8634220015069	11.27814	8.357257	7.8274	17.0569	7.666586	21.807319	6.651674
ENSG00000160808.9	MYL3	2.00422816230478	0.66241966305141	0.00248126424055738	0.062460715801213	3.460883	4.188924	1.687931	0.7332687	6.169227	0.0979562	0.244124	1.91915	0.816867	0.301729	0.678339	0.198065	0.1049745
ENSG00000150750.7	C11orf53	-2.32725098637242	0.769430231568613	0.00248927595300424	0.0624717377860952	0.0591911	0.0482077	0	1.015927	0	0.421489	2.1633751862	0.758922	3.06513	3.37979	1.08688	7.47271	0.39891
ENSG00000241449.5	AC092666.1	2.55142890664044	0.84349330209471	0.00248767979036704	0.0624717377860952	0.619748	2.735039	1.1660157	0	0.190132	0.331232	0.162967	0.204609	0	0	0	0	0.164358
ENSG00000232906.1	AC092685.1	-2.79944776417111	0.925456858488564	0.0024868574782012	0.0624717377860952	0	0	0	0	0	0	0.494188	0	0.0925628	0.0418749	0.262597	0	0.848217
ENSG00000249492.1	AC114956.3	-1.63279021740515	0.53992123235106	0.00249351983035086	0.0625148411368106	0	0.546738	0.785781	0.324825	0.164023	0.166978	0.889497	1.207372	2.391408	0.673414	1.32764	1.81522	0.80428
ENSG00000275688.4	CCL15-CCL14	-2.07731788381451	0.686995418815463	0.00249644055252266	0.0625247180892442	0.772736	1.363571	0.216138	2.82557	1.132910489309	1.490291	17.495051	0.796942	25.055138	4.50161	0.470364	3.550305	4.802956
ENSG00000272144.1	AC025171.4	-1.13082895488598	0.374076909006907	0.00250294494371463	0.0625331550559126	1.66126	0.286922	0.782207	1.20347	0.942358	0.422489	1.49786	2.57473	1.59672	1.39262	1.77871	4.05832	2.42012
ENSG00000020426.10	MNAT1	0.800855734090015	0.264937126574783	0.00250435872541562	0.0625331550559126	21.056383	25.153641	21.46016	8.5503244	24.653605	16.288876	6.167269	16.02638	11.720387	12.591881	16.497455	14.507377	8.562006
ENSG00000122863.5	CHST3	1.99012186731226	0.658308790831449	0.00250213916695438	0.0625331550559126	12.7388	54.9176	20.1345	1.63355	19.7163	3.40791	0.726398	11.6384	3.1375	3.51899	6.39605	4.26852	0.374906
ENSG00000272630.1	AL731563.3	-1.00545815079231	0.332709841665329	0.00251088085968408	0.062632809347664	0.465837	0.207724	0.145206	0.181742	0.353186	0.211827	0.480684	0.511836	0.463886	0.575694	0.374177	1.20099	0.531169
ENSG00000127423.10	AUNIP	-1.4434271248321	0.477698633097354	0.00251420082830427	0.0626524667637352	0.5765324	0.499519	0.5867643	0.8994945	0.221385	1.34483	1.59363	0.777625	1.796758	1.677092	1.6679923	6.244709	2.549114
ENSG00000130827.6	PLXNA3	-1.17835134531096	0.390103431745787	0.00252263882980755	0.0627363797422992	20.67135	10.24390398	17.9980004	16.999423	19.95715	15.92352476	25.257203	12.38549	52.07234	61.28739	18.74625	91.355435	51.04253
ENSG00000273179.1	AC092535.4	-1.52936741372383	0.506267616160785	0.00252051588691705	0.0627363797422992	9.79961	1.70825	7.17258	11.3744	2.53886	5.05451	5.95671	30.4072	43.198	16.023	41.9343	9.76658	9.60145
ENSG00000158109.14	TPRG1L	0.587338033385905	0.194519994240192	0.00253257138488757	0.0629201595572721	48.3722	37.9922	49.71784	29.8831	32.59313	43.465104	27.1712	39.651	25.121583	25.27450964333	33.66726	34.9979	17.56724
ENSG00000196428.12	TSC22D2	1.38836110323632	0.459864051307735	0.00253553137882233	0.062930515515505	25.829336	102.360594	26.058659	10.649708	51.583676	12.658348	9.763462	15.790352	11.848009	20.887647	11.858541	23.210932	13.574876
ENSG00000236710.1	AC108448.2	2.13009670573088	0.705665442864406	0.0025397527135088	0.0629399305306831	0.663519	0.91743	3.07892	0.221792	0.61744	0.0752355	0.149519	0.374332	0	0.0824689	0.0861517	0.362006	0.075691
ENSG00000211721.2	TRBV6-5	-2.11494549876361	0.700680573445569	0.00254099780158224	0.0629399305306831	0.473276	0.689166	0	1.29255	0.217469	0.380367	0.186881	2.11157	1.83713	6.81948	1.07849	2.06736	8.47513
ENSG00000196497.16	IPO4	1.21126715980974	0.401488938942294	0.00255342192551022	0.0630124557027488	13.532248	66.861283	17.7095035162323	13.3252440031536	43.3386007795464	19.301666	10.449718	13.4758132	13.9933330009484	12.4928410468168	10.5894134262	22.641975	11.50183764
ENSG00000227619.1	AL391056.1	-2.33956129492923	0.775550684870455	0.00255588728182738	0.0630124557027488	0.0893843	0	0	0.418463	0.0209655	0.10572	0.299751	0.132093	2.8721	0.524014	0.14204	2.28	1.3247
ENSG00000159792.9	PSKH1	0.798181639922975	0.26459588999734	0.00255621538052079	0.0630124557027488	20.948903	15.650943	18.649079	7.343817	13.4191	14.004273	7.70047	15.393171	11.2197346	6.614038	10.813198	7.95064	5.069244
ENSG00000160256.12	FAM207A	0.801721570166486	0.265800591873909	0.00255920460623409	0.0630124557027488	33.550553	36.524148	20.823936	10.35043	29.530134	18.308885	11.92203	15.166025	14.792899	15.671147	16.271334	22.721413	11.057674
ENSG00000213186.7	TRIM59	-1.42827363649096	0.473336728327373	0.00254904469972902	0.0630124557027488	1.083753	0.8977654	1.019785	2.5871149	0.904589	4.9744564	3.399706	3.333266	7.180418	8.8840709	3.881563	12.242549	6.6035149
ENSG00000168546.10	GFRA2	1.93214690160644	0.640549246138226	0.00255803273519402	0.0630124557027488	3.919076	5.20539140373	5.749607	1.6699736	2.0664376	0.52920810200111	0.295383972	2.8825452	0.1792824	0.363889	1.1348167	0.28247	0.0719602
ENSG00000124215.16	CDH26	0.955465045798825	0.316844829045179	0.00256503974141473	0.0630933483114388	1.3910777	0.69606	1.265516	0.8985434	1.85101566	1.937162	0.5545288	1.2075125	1.0760719	0.9077483	0.5090809	0.6957589	0.4354164
ENSG00000183340.6	JRKL	-1.09667335879	0.363859517975807	0.00257826003779378	0.0633555557449922	4.35368	1.6277	2.66556	3.70726	2.46954	5.13282	6.1082335	3.65485	7.5509793	8.67966	5.0524871	10.9208	13.8165
ENSG00000204584.1	FLJ45513	-1.33599387907287	0.443470578455028	0.00259030830185207	0.0635254498804057	0.634812	0.255609	0.45563	0.866804	0.595316	0.897167	1.69053	1.19887	5.10062	1.60826	0.96079	0.800132	1.67367
ENSG00000101197.12	BIRC7	-1.99474152250674	0.662125930952698	0.00258993088685493	0.0635254498804057	0.136809	0.457567	0.0462313	0.369262	0.161094	0.0339914	0.271578	2.12077	0.131392	1.138898	0.414218	1.16734	2.89638
ENSG00000141646.13	SMAD4	0.62757558651073	0.208368346236898	0.00259655194709562	0.0635984181201714	27.505203	23.3718138387	29.03704	14.4447733	18.9857306251	17.688146	9.9188368	24.5413600008145	16.475679	16.109266	17.039182	11.15376	12.104135
ENSG00000225864.1	AL645939.1	-1.57715293552191	0.523701514462597	0.00259918182319308	0.0635984181201714	1.96997	0.938676	1.38494	4.02757	0.884043	3.7313	2.81977	2.93687	8.07525	9.85046	2.83232	11.8644	18.2819
ENSG00000113916.17	BCL6	1.71907995466445	0.570869204446122	0.00260099410537941	0.0635984181201714	63.167300205706	180.458851	132.94692903	8.639058	112.689355	23.493193	5.2577107	64.999233	25.4331040182899	28.599838	31.672597	15.066933	10.986591
ENSG00000104695.12	PPP2CB	0.918964729014792	0.305222987770896	0.00260562219672889	0.0636486883100259	91.551923	135.700563	90.704236	40.9244	117.252278	63.573831	40.82381	79.072428	43.486105	44.309789	68.307316	58.274859	25.790442
ENSG00000138942.15	RNF185	0.778261386547485	0.258560810858534	0.00261269826316416	0.0637585981479261	30.832991	39.698239	37.559178	13.7050575	24.115579	19.24874583621	11.848945	22.2696720215218	19.521673	14.178761	24.42860135	16.98254	11.897396
ENSG00000153234.13	NR4A2	2.07336661635887	0.689018474636361	0.00261971384746769	0.0638668169020572	100.738345	8.4873170725777	9.7555107	1.532252	76.216422	5.812052	4.2041452	2.1216584	3.670887	18.496074646	1.410057	9.46586219	4.824147
ENSG00000211752.3	TRBV27	-2.1278100113936	0.707355131743853	0.00262868226623799	0.0639594323284749	0.527341	0	0	1.02911	0.48428	0.637106	0.625529	1.56987	1.53783	5.76063	0.962287	1.02569	9.02947
ENSG00000113712.17	CSNK1A1	1.07947817724687	0.358821624382174	0.0026262913821385	0.0639594323284749	92.18054900229	231.355278	95.812726	41.201463	107.6460406026	88.883853	36.045657	93.5849450091913	51.258011	46.714506	68.235357	69.35665	29.400687324
ENSG00000262585.1	LINC01979	-2.09473914333149	0.696654350920872	0.00263964985704852	0.0641631981460369	0.0297322	0.0574397	0.0301142	0.225733	0.0744927	0.0312229	1.37299	0.0893105	0.542751	0.545517	0.0449906	0.574885	0.0635503
ENSG00000156508.17	EEF1A1	0.747869914737864	0.248971690445536	0.00266599736032081	0.0645761653868051	8254.283896	9783.350644	8641.906577	4567.824781	6444.216985	6265.363698	2175.936282	7958.100078	6210.229726	4177.674133	5538.217106	4591.87021	3172.009171
ENSG00000248409.2	AP000344.2	-2.59383900330498	0.863681913426093	0.0026712683474734	0.0645761653868051	0	0.0484967	0	0	0.0469072	0.0792969	0.751819	0.197809	0.192721	0	0	1.83302	0.261149
ENSG00000173714.7	WFIKKN2	2.06055155101577	0.685963384871797	0.00266560619487192	0.0645761653868051	1.66139	0.343933	0.69121	0.0393505	0.529311	0.101053	0.0351156	0.336057	0.0426664	0.0438048	0.228967	0.0139982	0.0237745
ENSG00000251455.1	AC092611.1	-1.33620287992219	0.444938675901152	0.0026722971653299	0.0645761653868051	0.147071	0.022573	0.0618346	0.134409	0.0939105	0.170476	0.370642	0.101942	0.368326	0.275117	0.287086	0.317101	0.365
ENSG00000126709.14	IFI6	-1.39838804369767	0.465616643103296	0.00267066045736966	0.0645761653868051	283.46108	53.871218	108.106938	105.76499	88.50394	43.75915	467.95249	214.66686	230.68881	295.32838	265.58768	769.91	90.68542
ENSG00000160867.14	FGFR4	-1.93303047024107	0.643446373949269	0.00266295354970985	0.0645761653868051	1.6607689	1.4843897	2.246713	21.555819	0.8371516	5.1700076	49.658814	8.429567	43.997737	36.853935	12.333049	27.04053953382	29.719668
ENSG00000156030.13	ELMSAN1	1.08685319855183	0.361990158045053	0.00267826054898891	0.0646571290582738	27.820361	29.544848	62.229764	11.817957	15.0158901	17.7957325	8.5267294	16.268639	9.6360006	10.048651	12.7227071	25.73676	11.753405
ENSG00000103257.8	SLC7A5	1.45015999064365	0.483201495663547	0.0026896236324641	0.0648681645081133	35.7109	117.2778	29.567949	12.5535	37.823	81.76982	9.792172	6.39856	20.22487	19.110425	21.6395	39.1803	23.809114
ENSG00000274460.1	AC092119.2	-1.30110589270405	0.433678908849689	0.0026983827568438	0.0650160480215187	1.8685	1.46757	0.86805	2.09564	0.182268	1.35262	3.34779	2.03361	3.92407	3.7882	2.43951	3.79738	6.29471
ENSG00000215270.3	AP000523.1	-2.28633390780214	0.762162751159929	0.00270159159700744	0.0650300428676549	0.046113	0.114588	0.120056	0	0.0691441	0	0.489892	0.0583786	1.59742	0.0946272	0.0705786	0.265369	0.284084
ENSG00000253230.8	LINC00599	2.38429988546323	0.795063951720113	0.00270975685560393	0.0651595826344699	0.3379738	0.180772073	0.1315417	0.058596	0	0.0145531	0.0253075	0.0181879	0	0	0.0335295	0.0151354	0
ENSG00000225964.5	NRIR	-1.44445463443041	0.48170982612273	0.00271223964895955	0.0651595826344699	1.00651	0.162323	0.255347	0.588819	0.56882	1.224771	2.134233	1.117736	0.818939	1.318736	2.6269	3.48011	2.098491
ENSG00000001036.13	FUCA2	-0.84791516167048	0.282812249171977	0.00271618852673941	0.0651911591602005	29.396563	21.088145	25.965571	34.019276	35.443468	20.101569	38.017958	33.131423	59.167555	76.1247	42.176708	108.26955	41.577234
ENSG00000236782.7	AL391650.1	1.59177602980228	0.531115482423696	0.00272612104266199	0.0653661484502626	0.411264	2.202985	0.873194	0.3819895	2.615752	0.504923	0.251613	0.4301007	0.4936331	0.3679911	0.127719	0.833124	0.2830921
ENSG00000234377.7	RNF219-AS1	-2.28774602100694	0.763665467195328	0.00273776428995175	0.0655817786591055	0.0510452	0.0479719	0	0.0318911	0.00814098	0	0.0981845	0.0502134	0.491046	0.00752183	0.04995259	0.270402	0.236012
ENSG00000236155.6	AL355877.1	-2.03843533508005	0.680837591466495	0.00275335889115769	0.0658915529610223	0.0572362	0.112566	0.0580424	0.0453439	0.0247012	0.0452772	0.135468	0.282237	0.275029	0.0995102	0.798584	0.0543583	0.274693
ENSG00000245870.3	LINC00682	2.78108602464521	0.92934395154146	0.00276679014064025	0.0660684255177623	2.1945136	0.835367	1.663049	0	0	0	0	0	0	0	0	0	0.0339727
ENSG00000272106.1	AL691432.2	0.718022962666398	0.239924774056217	0.00276521073673965	0.0660684255177623	5.02822	5.18688	5.09799	5.02671	2.69209	5.31882	2.28691	5.43724	2.59711	2.70757	3.57423	2.9335	2.52765
ENSG00000271936.1	AC012073.1	-1.26783891235783	0.423699210400922	0.00276875963879246	0.0660684255177623	1.05156	0.214096	0.561221	1.25218	1.13811	1.22566	1.74658	0.927851	2.92507	2.02058	2.26247	4.41399	3.71896
ENSG00000100095.18	SEZ6L	2.03750961484752	0.681016808233129	0.00277279834808484	0.066101055032138	0.5962222	0.29411	0.908076	1.497615677487	0.1630447	0.0587311	0.2042577	0.362655200957223	0.0552107	0.0323533	0.151082000169834	0.017588	0.026713468
ENSG00000206538.8	VGLL3	2.09679354094391	0.700929065762445	0.00277656927914018	0.066127244285201	3.96642	12.5701604	2.278903	0.276828	11.5129057	0.372376	0.0816521	1.57686	2.79038	1.15064	1.087	0.292493	0.38712
ENSG00000272217.1	AL645940.1	-1.52948879588362	0.511621152611039	0.00279439167193989	0.0664877133866851	0.382428	0.246915	0.647512	0.397631	0.47274	0.608886	1.60832	0.377924	2.21337	3.66281	0.927286	0.733668	1.62631
ENSG00000124766.6	SOX4	-1.3385817870525	0.44810350505898	0.00281531088711105	0.0665721161858482	10.1724	8.22824	2.72881	8.09029	11.0291	5.02792	15.0018	6.78662	45.2118	37.7979	14.4104	10.2196	27.7902
ENSG00000170871.11	KIAA0232	0.758375871151942	0.253782381405504	0.00280541343521993	0.0665721161858482	9.2669002926	11.2767261479	12.1684516357	5.1419090553	6.6696849269	9.2302849201	3.55680461936	8.6811013917	7.875588	6.541061268	6.2918369072	3.8915568982	3.78357257569
ENSG00000141741.11	MIEN1	-1.60059105686654	0.535842140392902	0.00281677129305246	0.0665721161858482	40.854645	40.889367	37.577058	47.940452	42.5297717020758	56.032736	161.17496	43.639785	703.75661	89.213892	78.984439	76.257121	59.5628
ENSG00000271425.7	NBPF10	0.700039855412946	0.234351596894649	0.00281605346977708	0.0665721161858482	3.7714365	3.6806521	4.0067239	1.6296227	2.7002309	4.6020318	1.964011	2.4608371	3.1168787	1.901439	2.5993473	2.2676934	1.5737564
ENSG00000213512.2	GBP7	-2.5220855499951	0.844176785553324	0.00281152245695403	0.0665721161858482	0.0222965	0.0344312	0	0	0	0.0175809	0.1143592	0.0440456	0.103028	0.06166977	0	0.0337083	0.612392
ENSG00000077238.13	IL4R	1.1822884337495	0.395693859507717	0.00280913639685844	0.0665721161858482	107.571893	235.743384	205.644072	35.3793783	84.404987	50.932992	47.2660628	77.2947611	63.708732	70.269738	50.7482046	44.191424	31.7499641
ENSG00000108381.10	ASPA	1.75760183325879	0.588103111660614	0.00280263647242748	0.0665721161858482	3.11286	2.176328	2.7484119	1.1836	4.024736	0.749109	0.38612	2.47903	0.3255719	0.325324	0.671661	0.0543556	0.3161653
ENSG00000236200.5	KDM4A-AS1	-0.937096700006852	0.314075046235173	0.00284812562562124	0.0672489204255702	1.251752	2.092363	1.409132	2.045898	1.437745	2.0973977	1.971906	3.571737	3.022633	3.774744	3.068994	4.993006	5.81539
ENSG00000283646.1	LINC02009	2.28187026658032	0.765469872786863	0.00287303184564566	0.0675377450683441	0.255759	0.123552	0.0555217	8.26766	0.188626	1.72793	0.403627	0.215953	0.280297	12.9457	0.199056	0.344966	0.0439124
ENSG00000076641.4	PAG1	-1.19039440711147	0.399244611778531	0.00286730729610823	0.0675377450683441	2.79316	1.70792	1.88256	3.79378	1.53696	1.98872	4.26913	2.71757	4.889143	8.835866	3.18056	4.85496	12.294393
ENSG00000035499.12	DEPDC1B	-2.07826143854457	0.696923909897932	0.00286325912816856	0.0675377450683441	0.349426	0.2129054	0.1131229	1.8933	0.184596	3.429839	2.6204352	1.128908	6.953376	5.497087	2.89811	21.19697	9.4286074
ENSG00000105771.13	SMG9	-0.971133199508003	0.325784981064011	0.00287400466991175	0.0675377450683441	20.4587149	12.927178	15.6204856	19.521693	28.676171	22.574056	51.0501047	21.634155	40.501386	60.661936	25.232186	47.1821733	55.847625
ENSG00000128683.13	GAD1	-2.10050991422176	0.704624649439359	0.00287277059673776	0.0675377450683441	0.686484	0.0256336	0.1315523	0.1790047	0.3271791	0.5684882	0.3995733	0.468488	8.467718	0.37089	1.0169551	3.996472	0.4012632
ENSG00000272510.1	AL121992.3	-2.37679470452992	0.797621966320841	0.0028838851544065	0.0677056339144108	0	0	0	1.02603	0	0	3.64667	0.65248	2.48524	3.12638	0.299948	1.5995	1.57228
ENSG00000272872.1	AP000525.1	-2.10543743929437	0.706895293306914	0.00289730149318565	0.0678711401473082	1.56828	0.981069	1.41351	2.4131	7.15544	0.81203	15.5985	0.981188	58.0696	13.7076	6.42412	0.509939	17.3221
ENSG00000247381.3	PLUT	-2.62062235913652	0.879822172463605	0.0028958566850633	0.0678711401473082	0	0	0	0.084585	0	0.034189	0.410583	0.0213598	1.93392	0.11298	0.0984366	0.471055	0
ENSG00000001626.15	CFTR	-2.36696707979443	0.794755740969162	0.00289916327079025	0.0678711401473082	0.2358068	0.340141	0.111616	2.3688949	0	3.320893	7.6135083	0.5144684	14.98562	36.5981861	2.8317703	13.9452224	4.659103
ENSG00000173041.11	ZNF680	-0.859748419796931	0.288745407995276	0.00290580203344818	0.0679622602246459	2.509255	0.906057903	1.958112	2.2636295	1.73558	2.969391	2.956837	3.5334334	5.195346	5.682939	2.359088	6.236237	3.695861
ENSG00000175866.15	BAIAP2	0.943103813455909	0.316886718035382	0.00291887825785713	0.0682036284142348	46.289184	33.531187	43.0788354	22.335134	32.353191	70.4907712	19.312252	38.837489	22.381202	20.044161	25.3027298038926	29.233671	9.01112252
ENSG00000187730.8	GABRD	-1.56330098960697	0.525852849925739	0.00295013244797719	0.0686330949990349	0.7488836	0.21645419	0.62058154	0.184957	1.0423998	0.5137969	0.722363	2.2102874	3.241579	5.626734	1.1082395	1.0996748	0.4393806
ENSG00000224853.2	LINC00393	-2.74488953518607	0.923339893772195	0.00295112600844507	0.0686330949990349	0	0	0	0	0	0	0.1384272	0	0.0742829	0.4251027	0.948362	0.1694957	0
ENSG00000216588.8	IGSF23	-2.60072555609643	0.874628234338433	0.00294404113310613	0.0686330949990349	0	0.0964811	0	0.155478	0	0.146903	0.724388	0	2.8755536	0.3972102	0	0.3553983	4.791743
ENSG00000233038.6	AC011899.2	-1.68279147717789	0.56585670584219	0.00294057447094111	0.0686330949990349	0.1391509	0.141837	0.297584	0.214476	0.289626	0.2037088	0.21689	0.3437166	0.82704	1.290883	0.249734	1.932195	1.416892
ENSG00000136982.5	DSCC1	-1.19985836082713	0.403553755919085	0.00294683001801987	0.0686330949990349	1.16488	0.597268	0.963484	1.81783	1.29344	3.535077	2.13844	2.427868	5.15707	4.745787	4.341389	5.777883	5.50353
ENSG00000142166.12	IFNAR1	0.70638013414401	0.23787837938997	0.00298283642919397	0.0687517573505417	14.0389	21.82993	16.81263	9.777275	24.7228	11.31268	9.977077	12.2171139249	13.11988	10.214244	8.77388	12.976324	9.67288
ENSG00000231081.1	AL078587.1	-1.85631336480298	0.625151817964941	0.00298401242248866	0.0687517573505417	0	0.142251	0	0.228959	0.13583	0.234169	0.463045	0.290344	1.27592	0.895301	0.534152	0.423635	0.584861
ENSG00000086300.15	SNX10	-1.66528287868566	0.560505211312863	0.00296794025870536	0.0687517573505417	3.276039	1.421341	3.138091	2.4342672	6.970335	2.818888196	2.146991	5.0866	8.9229894	12.9101397	4.47701	15.818553	42.0101915
ENSG00000269386.5	RAB11B-AS1	0.88641302608605	0.298326478118012	0.00296556317643517	0.0687517573505417	6.44544	7.090742	5.206994	6.07533	6.273627	5.712772	2.724992	6.011963	4.48637	2.594783	5.219114	3.366575	1.23874
ENSG00000183091.19	NEB	-1.72866537541507	0.581970649986569	0.00297445898268747	0.0687517573505417	0.6666172	0.154009	0.5005395	0.73409795	0.54553461	0.640942520913	5.24769433	0.2816676982	4.1853572	0.656308064561047	1.7882055201	0.9151806	1.8078648377
ENSG00000123364.4	HOXC13	-2.63541991432682	0.887176436556003	0.0029724742877095	0.0687517573505417	0	0	0	0	0	0.0356531	0.0178386	0.0668195	0.824014	0.0196351	0.0205289	0.106794	3.71267
ENSG00000250564.1	AC109454.3	-2.68339684955752	0.903055210833121	0.00296382763628767	0.0687517573505417	0	0	0	0.0835327	0.09953	0	0	0.105783	1.65129	0.559283	0.194729	0	3.67569
ENSG00000177432.7	NAP1L5	1.65562538803891	0.557526506365826	0.00298197012604254	0.0687517573505417	23.1206	16.9071	16.3916	1.71481	9.36781	1.59535	1.22545	7.21902	1.79955	4.88741	5.37554	2.1062	1.36114
ENSG00000122378.13	PRXL2A	1.46014349625324	0.491624295397898	0.00297761617932227	0.0687517573505417	39.53552	25.076585	41.906847	17.592394	178.549445	82.880853	26.5897	40.66082	21.7929	19.31119	30.240575	15.668499	12.485641
ENSG00000174238.14	PITPNA	0.821660690577291	0.276488351868104	0.00296085259465768	0.0687517573505417	45.198915	81.0214	57.709496	27.229987	53.142519	65.707746	25.569684	43.568532	39.915516	25.5638112024	29.086779	57.004258	21.129724
ENSG00000147604.13	RPL7	0.785053449489916	0.264463744035537	0.00299283519863012	0.068890890223351	2329.064286	3376.24435	2237.852265	1291.367793	1719.44443	2288.980085	797.332687	2003.700557	2408.9006	1265.00449	1328.96159	1347.221378	834.07776
ENSG00000189241.6	TSPYL1	0.698244303222092	0.235382026113499	0.00301278937397671	0.0692355941472325	54.4047	60.5576	47.0817	21.0751	43.5273	29.1257	16.7965	40.8359	31.6041	28.7848	31.7423	26.1984	23.816
ENSG00000103647.12	CORO2B	2.0352806580297	0.686118953828261	0.00301340613847522	0.0692355941472325	4.1238883	3.813579	4.307577	0.5509117	13.13729	0.3414217	0.2785617	3.224423	1.07699	0.515565	1.13644	0.136306	0.167156
ENSG00000165462.5	PHOX2A	2.71549097006265	0.915709816251399	0.00302241226985704	0.0693780998308094	6.21196	1.135164	4.76116	0.0538407	0	0	0	0.2042887	0	0.0600139	0.238184	0	0
ENSG00000172167.7	MTBP	-1.15408951703243	0.389216845855885	0.00302527326216679	0.0693794132273562	0.7753994	0.3424057	1.1677288	1.0598727	0.6760086	1.9001811	1.70994	1.1746169	2.946436	2.2391358	2.6054888	3.8753618	3.287046
ENSG00000007038.10	PRSS21	-2.42462144020748	0.817849102548313	0.00303045418634558	0.0693905347666347	0.164998	0.101522	0	1.2954772	0.0709903	1.140697	5.222236	0.503066916	3.321508	0.365091628	24.554207	1.917093	0.6220229
ENSG00000049247.13	UTS2	-1.62730191918736	0.548922390830855	0.00303136666327469	0.0693905347666347	2.783905	1.064767	0.426457	6.05864	1.057016	1.790398	3.474958	2.886338	8.87719	16.09584	4.596952	13.667	12.44447
ENSG00000156218.12	ADAMTSL3	1.79177808832968	0.60460875892782	0.00304129320786875	0.0694250926464135	9.392595	6.6029399	8.3589439	0.8818302	9.3538663	1.0032701	0.627064	3.9674695	0.7175106	1.552768	3.1969688	0.3160755	0.4977364
ENSG00000139292.12	LGR5	-2.25076592092575	0.759419506411869	0.00303867805234605	0.0694250926464135	0.113936	0.1620398	0.104558	2.061843	0.556557	0.2768948	0.781234	0.341852	24.497085	1.720493	0.589644	2.1188014	5.67699
ENSG00000180772.6	AGTR2	2.67582370451064	0.902845552359647	0.003038984586773	0.0694250926464135	2.66087	0.416406	1.67055	0	0.0703521	0	0	0.0738374	0.0359394	0.0162732	0.136119	0	0
ENSG00000254349.5	MIR2052HG	-2.73570176934829	0.923262552105102	0.00304576362881442	0.0694630608248967	0	0	0	0	0	0	0.0205997	0	0.479284	0.3260894	0.0711231	0	0.3043786
ENSG00000258441.1	LINC00641	1.08697611211761	0.367041831467587	0.00306193987343529	0.0697676815544718	11.86989	22.0394	20.02054	6.54176	15.75971	4.29421	4.20005	10.28688	6.16464	4.02727	8.46764	8.74314	5.19596
ENSG00000196993.8	NPIPB9	-0.980490111064545	0.331173080965144	0.00306982978892873	0.069883107752568	0.89488	0.833268	1.00895	0.793984	0.545343	0.45824945	1.372475	1.522022	2.09579	3.16737	0.95433573	2.154415	0.650966
ENSG00000233435.2	AGGF1P2	-2.43049608108645	0.821152449067798	0.00307779124097613	0.0699999487665023	0.0263672	0	0	0.098682	0.024727	0.041597	0.770234	0	0.597505	0.152088	0.0395991	0.0347012	0.737762
ENSG00000240280.6	TCAM1P	-2.54196837496391	0.859126126451242	0.00308855808645173	0.070115935641512	0.0322469	0.015577	0.03809802	0	0.2575582	0.1160767	2.8093293	0.0635283	0.0309194	0.2451799	1.140425	2.560427	0
ENSG00000234444.9	ZNF736	-0.934426740130601	0.315805935176208	0.00308775568019917	0.070115935641512	3.1291015	1.6500142	2.1903495	3.9238446	1.529997	2.6842598	3.212558	3.4190162	5.5954112	5.5479491	4.6948106	11.3699228	4.8915184
ENSG00000124224.16	PPP4R1L	-0.795356815176784	0.268914875227204	0.00309991137113908	0.0702880008788608	4.874015	2.0896526	4.3824046	4.7238814	2.4962992	5.362661	5.415628	5.9665588	9.718897	10.6262305	5.3809515	10.7044167	6.748458
ENSG00000169627.7	BOLA2B	-1.06438921328427	0.359899402532251	0.00310181842633728	0.0702880008788608	53.97916	44.42976	53.227789	117.89436	73.078466	86.74392	181.44949	77.53279	137.85804	304.3061	145.1615	199.38835	155.20053
ENSG00000163904.12	SENP2	0.574424297696135	0.194294459925357	0.0031119000275937	0.0704519361233358	13.6918676	16.576757	15.456387	7.031921	13.801679	10.792056	7.323433	12.662499	8.417698	8.796585	9.0588873	11.534068	8.187211
ENSG00000265681.7	RPL17	0.736813915394815	0.249418545923173	0.00313555532537352	0.0709225928028956	1838.274669459	2089.028158	1835.136527	1488.04058	1295.179542	1871.232544	536.6474023797	1942.4406106	1090.34854508409	1120.905473	1368.28348296927	793.06295	1168.161807
ENSG00000279789.1	AC120114.3	-1.19112543683711	0.403274657437463	0.00314056993093611	0.0709711442383689	2.21792	1.16905	0.919352	2.63516	1.48925	2.10712	6.90079	2.80612	2.70797	4.85989	1.87674	6.90808	5.32966
ENSG00000173334.3	TRIB1	1.81067493438491	0.613220572911856	0.00314977074227973	0.0710124851073292	17.93844	88.097071	19.124089	15.557264	211.933621	12.0252	10.653371	12.867344	33.776426	20.277296	3.70634	18.665321	17.813568
ENSG00000274925.1	ZKSCAN2-DT	-1.00911887630947	0.341791173679616	0.00315270514831484	0.0710124851073292	1.60339	0.982755	0.838347	1.92373	0.517919	1.68492	3.08818	1.86815	3.73624	3.18902	1.86289	2.75054	3.37076
ENSG00000255819.7	KLRC4-KLRK1	-2.09136785751062	0.70837641978347	0.00315375725507968	0.0710124851073292	0.51151591	0.140198	0.112593	0.9616023	0.209392	1.0307754	0.2099885	2.426596	1.4156968	2.451877	0.3862964	2.166569	13.0372
ENSG00000158859.9	ADAMTS4	2.21825259260134	0.75135712576199	0.0031538784050497	0.0710124851073292	59.35706	115.6859	87.0829	0.5299698	165.1026	1.046915	2.351625	6.42834	20.97166	32.70338	3.955098	14.61183	2.699914
ENSG00000146469.12	VIP	2.46513018153234	0.835129119318519	0.00315932328905494	0.0710704134433313	37.94688	26.75765	92.88138	0.594955	0.851289	0.3757649	0.458404	9.199032	0.453126	1.956627	5.685666	0.06889493	0.2219728
ENSG00000272405.1	AL365181.3	-2.17252288434259	0.736175980826104	0.00316652811407453	0.0711677912650084	0.184339	0	0.0336938	1.38848	0.153335	0.982965	6.10205	1.47257	6.7111	1.16977	3.85433	2.43314	2.07883
ENSG00000123643.12	SLC36A1	-0.668074761783535	0.226481633047455	0.00317983146451544	0.0711841169894831	3.67408	2.64427	3.2925048	4.0765517	3.81616	4.37567	3.78039	5.4949255	6.904158	6.8820294	5.2181721	7.9950353	9.1308342
ENSG00000228794.8	LINC01128	1.12038556477933	0.379756903740303	0.00317495892578673	0.0711841169894831	15.457946	18.478216	14.27456	4.1931395	27.269852215	5.5118608	6.592406	10.507759	7.379892	6.32604464	5.602751	7.126358	4.5809552
ENSG00000138750.14	NUP54	0.538138480795686	0.182383405062718	0.00317168584656604	0.0711841169894831	21.042262	31.683274	21.044573	17.154499	23.782751	20.198107	11.323022	22.874721	20.640329	15.647918	16.993619	15.85508300258	16.63172
ENSG00000196205.8	EEF1A1P5	1.08942630133117	0.369295208056627	0.00317758785581664	0.0711841169894831	9.70735	12.3939	9.10894	4.31489	6.86156	7.50816	1.47377	8.82295	5.64907	2.93859	5.40622	4.1491	1.56305
ENSG00000253686.1	LINC01484	-2.50405816396636	0.848942300026275	0.00318163804366006	0.0711841169894831	0.023256	0	0	0.220603	0.021817	0.0183391	0	0.1627596	0.709133	1.288137	0.021118	0.5967557	1.841311
ENSG00000177182.10	CLVS1	1.66893131276696	0.566066565189339	0.00319531824326758	0.0712325675041949	0.243737076	0.286625	0.3382118	0.0708151	0.474739	0.2736027	0.066332	0.207831	0.0592556	0.0281924	0	0.0705212	0.1512293
ENSG00000136244.11	IL6	2.50925606243341	0.851065354885614	0.00319453857205534	0.0712325675041949	137.763804	50.387517	143.143987	0.27948118844	571.285682	0.882122007	0.421374	7.7497068365	54.925391	34.37818	0.567479	3.355948	2.6077090961966
ENSG00000223561.6	AC005165.1	2.40116906561899	0.814417975595444	0.00319500738500432	0.0712325675041949	32.24604	28.860677	11.134046	0.8449435	0.0717068	0.237457	0.2978695	1.019945	0.734085	2.4432868	4.479862	0.1238772	0.159808
ENSG00000145242.13	EPHA5	2.24398423640256	0.761009586906704	0.00319120003643026	0.0712325675041949	0.142818391186597	0.136275667772	0.1591901	0	0.0760831664398	0.019622912058	0.00491684720174	0.02454298325	0.0149323	0.012605509532	0.0395975656728	0	0
ENSG00000259583.2	AC015712.2	1.55817215583761	0.528675188985024	0.00320546801579175	0.0713945148971798	6.9199	11.4494	6.177873	1.404581	22.065826	3.0445915	0.925839	3.002534	3.709894	3.342954	5.262501	1.114363	2.885204
ENSG00000106683.14	LIMK1	-0.994149800061359	0.337374245532797	0.00321156595288295	0.071466006748281	9.759977	6.3064752	7.287202	9.765788	8.3249142	9.750986	6.460541	11.332863	22.08522	19.301354	13.353713	30.39275	33.287596
ENSG00000229152.2	ANKRD10-IT1	-0.964625292408393	0.327426734573662	0.00321829348041217	0.0714871383956904	16.5797	10.9385	13.0859	12.8671	3.66686	8.10037	17.3703	20.5785	45.7723	28.4782	17.5023	15.2459	20.7386
ENSG00000267395.5	DM1-AS	-0.863366390140738	0.293034344753086	0.00321602802796481	0.0714871383956904	1.912434	0.673968	1.384133	1.84381	1.909597	1.569794	3.038962	3.23955	2.955644	2.77538	3.978296	4.591668	2.113754
ENSG00000126768.12	TIMM17B	-0.61546150172912	0.208981656537537	0.00322902106527122	0.0715096130522591	54.822203	41.338197	49.138151	39.87796	27.467217	38.34829	67.993166	44.60692	68.951627	86.592834	60.933675	97.98759	60.159285
ENSG00000109881.16	CCDC34	-1.39501480669703	0.473704983705433	0.00323056853555496	0.0715096130522591	3.36539	3.22817	2.950694	10.834759	3.616228	8.689143	8.973255	6.886278	13.860383	12.96368	15.673818	25.12683	37.96348
ENSG00000248724.6	NPHP3-AS1	2.25378234719608	0.765323929630248	0.00323086471579817	0.0715096130522591	0.061998	0.301437	0.0599338	0	0.0531382	0.0302619	0	0.0186085	0.0208941	0.0163873	0.0169969	0.0183673	0.0154024
ENSG00000271698.1	AC233992.2	-1.12229662264551	0.381053109041743	0.00322693937312899	0.0715096130522591	0.346098	0.141145	0.171665	0.190599	0.103038	0.14561	0.114818	0.494548	0.595455	0.465346	0.508483	0.490492	0.532318
ENSG00000029559.6	IBSP	-2.66468591654902	0.905276225240367	0.00324517630106158	0.0716981139015793	0.0373366	0	0	0	0.0349705	0	0.0294589	0	1.32615	0.227079	0	0.954527	0.0298908
ENSG00000189013.14	KIR2DL4	-1.92234959574709	0.65304961662244	0.00324366447844775	0.0716981139015793	0.0880114	0.2942274	0.0783668	0.723874	0.13645	0.2323977079776	1.015878	0.2544252	0.4343050143676	1.520215187798	0.512768	1.3794619	4.497639
ENSG00000235493.2	LINC01967	-1.76819805126346	0.600849895046554	0.0032522878419886	0.07172715031195	0.25942	0.167359	0	0.0709958	0.0805429	0.0688073	0.136408	0.171291	0.589875	0.4608236	0.3607018	0.748894	0.335842
ENSG00000163930.9	BAP1	0.429201491900839	0.145835821743134	0.00325000410754658	0.07172715031195	44.648406	61.327063	50.769155	40.34028	43.02196	46.5917	28.651826	44.615442	50.97204	32.709371	35.76102	46.968071	35.904113
ENSG00000125755.18	SYMPK	-1.01288677843291	0.344415030184392	0.00327270545057091	0.0721131757563465	41.299912	32.97501028	32.050291	51.250922	37.04398288	28.8149034	103.662713	43.54128	75.092768	80.347962	44.7209785	79.318927	145.026658
ENSG00000262979.1	AC124319.1	-2.07304124180549	0.705083178562593	0.00328067005404314	0.0722243598641437	0.443549	0	0.112603	1.38367	0	1.234	1.92383	0.766697	3.41983	6.46634	1.10886	6.36695	4.86657
ENSG00000232850.3	PTGES2-AS1	-1.47562449181446	0.501943098767912	0.00328398465779297	0.0722330669840773	0.185154	0.102243	0.321621	0.350849	0.198439	0.440335	0.87657	0.367742	1.92859	2.07139	0.361758	0.578475	0.402528
ENSG00000230426.3	ERVMER61-1	1.99328683164175	0.678177413039107	0.00329079792581944	0.0723186453591492	0.1431692	0.104738	0.3128431	0.0714948	0.2228423	0.043677	0	0.0343435	0	0.0470708	0.0158283	0.0514058	0.1006108
ENSG00000161642.17	ZNF385A	1.2789872757027	0.435221531929335	0.00329587631209924	0.072365979896092	21.160311	58.734055	40.552343	10.15659555325	73.523836	55.7687685	5.3923214793	30.288793	19.337310203	19.5312974028	15.7199825	18.876747	25.601531
ENSG00000261668.1	AC093591.2	1.74102998710717	0.592607195755872	0.00330426852627363	0.0724217224824101	0.277657	0.236876	0.202128	0.0575428	0.121965	0.182717	0.0120858	0.0841254	0.0324935	0.0138992	0.185348	0.0260327	0.0135157
ENSG00000255126.1	AP003064.1	-1.47118665926263	0.500727360690057	0.00330231337168054	0.0724217224824101	2.46722	1.16591	0.779667	0.840222	3.51577	1.57123	11.1589	2.5737	3.36439	9.35496	3.31236	6.13971	2.11802
ENSG00000273723.1	AL139089.1	-1.41994851633738	0.483450006939637	0.00331280679326831	0.0724804633947164	1.68575	1.63056	0.789142	2.42775	0.42377	1.43701	3.78484	3.06986	10.7214	3.83319	2.17956	1.35603	6.68773
ENSG00000273654.1	AC020904.2	-1.92790180943698	0.65637635930952	0.00331201555593011	0.0724804633947164	0.042261	0	0.0856175	0.0538761	0	0.0333876	0.27228	0.206856	0.1112661	0.0898904	0.0768563	0.393305	0.110302
ENSG00000261822.1	AC018362.2	1.09170168183643	0.371830450069781	0.00332452760981728	0.0725444759302722	1.97721	2.560626	1.71833	1.37792	2.27409	1.92033	1.29611	1.27769	0.61505	1.10185	0.633867	0.4459244	1.38759
ENSG00000223387.6	LINC02068	-2.31473827337981	0.788364503146658	0.00332338271402939	0.0725444759302722	0	0	0	0.0520779	0.0156647	0.0262996	0.1354185	0.016436	0.0319983	0.101427	0.372835	0.425249	0.0267401
ENSG00000083896.12	YTHDC1	0.373182923362995	0.127081352799477	0.00331866984483211	0.0725444759302722	44.20815	45.62602	43.75584	32.109001	32.732309	39.20388	23.637955	37.878212	37.852066	32.756299	32.748314	31.663859	37.352143
ENSG00000166411.13	IDH3A	0.91137465938111	0.310549430443588	0.00333852138795717	0.0725540938714346	34.611982	92.316554	54.273317	20.401795847	66.588784	46.5188217	20.468141038115	34.044018	32.952821206607	27.916146	34.387181060595	42.194769	22.6407729
ENSG00000100504.16	PYGL	1.78529118207747	0.608185688279391	0.00333077516188652	0.0725540938714346	17.871858	32.711376	10.958348	4.214965	151.22103	21.626124	8.283982	10.742207	26.652029	9.751585	11.284582	4.524535	6.940457
ENSG00000156931.15	VPS8	-0.52128286250296	0.177626420889805	0.00333854533517015	0.0725540938714346	15.6013959	10.2068779	12.82289559727	12.89176837439	8.840265	12.6425880000859	20.0120052916684	17.08307700033	16.538528	19.390494417	18.995813953	20.188143	19.36238451578
ENSG00000114349.9	GNAT1	2.57151809763504	0.876071278821073	0.00333242421347991	0.0725540938714346	0.04907625	0.10952	0	0	1.169271	0.4860742	0	0.044667	0.0434867	0.0196882	0	0.0642505	0
ENSG00000198482.11	ZNF808	-0.899194314938696	0.306409742926992	0.00333962872982679	0.0725540938714346	2.105183	1.33137	2.522322	1.49898	0.8723365	2.014464	4.924604	2.747332	2.88713200432506	3.1141739	2.229496	4.320424	3.80687300342107
ENSG00000138685.15	FGF2	1.92928685848543	0.657727775056467	0.00335422401300934	0.0726797488633241	10.36139	18.49767	18.81455	0.983087	16.36604	1.127131	0.499378	5.82509	1.56710000151917	2.49289	6.00496	0.439515	0.850332
ENSG00000257702.3	LBX2-AS1	-1.4557748760261	0.496225601607371	0.00334952502767995	0.0726797488633241	2.009222	0.858328	0.919493	7.660206	3.144	2.851686	9.576167	3.98553	12.3632	11.30135	5.901018	15.2208	11.3297
ENSG00000156076.9	WIF1	2.7001475703535	0.920465461913439	0.00335208068359962	0.0726797488633241	0	7.83975	0.0249859	0.0962045	1.91979	1.314033	0	0	0.2113713	0	0	0.422433	0
ENSG00000119689.14	DLST	0.734380264964598	0.250453945094722	0.00336573352787369	0.0727425909030095	60.753316	69.762201	65.40273	37.4644083	86.167203	49.691811	24.705346	56.144905	39.519615	30.436375	40.7286902	69.011673	27.20554530578
ENSG00000161970.14	RPL26	0.490952299315422	0.167448263526716	0.00336825667244078	0.0727425909030095	2027.922193	2208.783026	1960.346664	1585.144832	1731.114274	2317.936674	823.392955	2128.674459	1713.518225	1576.88044	1615.196102	1922.969754	1225.443414
ENSG00000184530.8	C6orf58	2.71714764990717	0.926751166997249	0.00336888297332184	0.0727425909030095	0.050254	0.242969	0.101905	168.317	0.0470005	54.2686	3.92521	0.612455	0	0.698842	0.0912982	0	0.0402095
ENSG00000236481.1	LINC02195	-2.57332498002999	0.877499558462864	0.00336173942384862	0.0727425909030095	0	0	0	0.361076	0	0.374904	0	0	2.71199	7.28849	0.421894	3.59919	3.32942
ENSG00000006283.17	CACNA1G	1.98880418022482	0.678557224024916	0.00337948192756195	0.0728571759626438	0.8248283865	0.37458418	0.2464730906	0.061381271859788	1.099922908	0.0752958	0.0318967	0.2777833	0.0840663	0.02522120159477	0.20823520191975	0.0100865	0.0276062
ENSG00000231607.10	DLEU2	-1.22871762173762	0.419232230721678	0.00338007831905901	0.0728571759626438	1.30333687	1.056197	1.339649	2.147093	1.666299	4.3594646	2.215443	2.614541	6.27266864763	7.383501	4.451645	7.550314	8.439116
ENSG00000002726.20	AOC1	-2.52290778362434	0.861266221185171	0.00339725546044256	0.0731636957081385	0.3607313	0.1982794	0.2058074	15.306355	0.250346	6.698265	180.220856	2.3837278	205.77585	2.115921	7.9524934	3.81851	9.9973109
ENSG00000106688.11	SLC1A1	-1.36916515947515	0.467508757671376	0.00340447747487419	0.0732291996663486	0.970323	0.51005	0.823902	1.7855887	1.83582	2.06874	2.528151	2.5018	4.361976	2.31706	3.271292	13.341753	2.11552
ENSG00000187837.3	HIST1H1C	-1.61772849053475	0.552411966704114	0.00340621575332258	0.0732291996663486	24.8882	16.2847	16.5038	46.1754	42.7384	28.1915	84.0638	35.5867	38.5591	267.082	26.7588	317.687	51.3205
ENSG00000163877.10	SNIP1	0.628634436098748	0.214727275143166	0.00341594997969993	0.0733747241733288	6.39607	9.011635	6.85163	4.764017	9.04967	6.097524	3.001177	6.962688	4.56552	4.20754	4.86764	6.8509107	4.834949
ENSG00000256040.2	PAPPA-AS1	1.57374420579219	0.537701030454759	0.00342467334746334	0.0734983018065745	0.650402	0.95492	1.37347	2.52105	5.26643	1.64831	0.417183	1.41649	0.877314	1.31604	0.658496	0.327381	0.129468
ENSG00000251003.8	ZFPM2-AS1	-1.97338138666955	0.674382923206329	0.00343126871114397	0.0735760348849719	0.704553	0.265764	0.522718	0.4452973	1.172911	0.050535	1.627306	0.707319	1.910498	4.02129	7.463656	0.121379	3.825662
ENSG00000067082.14	KLF6	1.18788165904333	0.406065605507113	0.00344075431975073	0.0737155546685989	114.395692	313.7684	135.478289	58.932299	242.442067	72.116842	39.865267	81.719202	82.78468	118.261652	32.092109	90.98133	72.4406753
ENSG00000219470.1	AL355802.1	-1.32736161690046	0.453847313505696	0.00344802161216222	0.0738073484368115	0.147356	0.498942	0.0747572	0.517247	0.412563	0.116737	0.75551	0.872329	0.982468	1.28144	0.468622	0.911658	0.883301
ENSG00000213366.12	GSTM2	1.19628965752217	0.409313144845438	0.00347037556467244	0.0742216450715813	194.797228	185.916908	230.7810888	76.3540089	127.0242447	60.4734583	26.725885	148.046095	39.59312	56.4981779328658	100.55079	35.3143997	54.422057
ENSG00000230366.9	DSCR9	-1.74879797347688	0.59853744509526	0.00348031240213093	0.0743698880748961	0.10899828	0.210981	0	0.0869615	0.10126853	0	0.3438495	0.2153025	0.501073	0.156128	0.0948232	0.488749	0.280818
ENSG00000267940.1	AC022762.2	-1.4648404684237	0.501489150727957	0.00348930687953427	0.0743700417100225	0.610202	0.547803	0.30929	1.08819	0.734308	1.6529	3.30132	1.50388	3.55773	1.21202	0.870953	2.97425	5.61637
ENSG00000189221.9	MAOA	1.47519886698373	0.505035804654874	0.00348933596384466	0.0743700417100225	31.0161236	34.3442624	57.958264	26.782946	106.679258	55.933133	22.1069267	31.440436	14.9603824	13.1623871	25.3603588	25.2041962	1.4578356
ENSG00000173011.11	TADA2B	0.55297222028385	0.189307700463358	0.00348883637415999	0.0743700417100225	11.823646	9.10731	13.803981	8.420794	9.305855	7.485084	4.219401	8.925522	8.130137	10.18195	8.425222	5.709188	6.444952
ENSG00000114737.15	CISH	1.37952826093564	0.47238073168198	0.00349611886164608	0.0744504829874633	12.63046	58.34402	22.92273	6.201601	31.2222700847	7.9168	7.157311	6.289731009	14.04121	10.23193	5.768789	7.060465	13.19195
ENSG00000188820.12	CALHM6	-1.57103621353929	0.538087163865359	0.00350403757469815	0.0745549525244244	7.82023	2.571416	3.45302	10.137051	8.252030063	9.42436	3.92878	9.09752841	17.03204	33.27591	13.89338	35.4674	66.83413
ENSG00000151834.15	GABRA2	1.00255418100855	0.343414056799847	0.00350734781710715	0.0745612729676258	0.689432420410671	0.65392577	0.60408839	0.16495263	0.35823358	0.34110325	0.206675451	0.3713578	3.084789837016	0.15794853	0.1768991	0.26869248	0.16886955
ENSG00000123505.15	AMD1	1.07024150694465	0.366638490434191	0.00351083249452581	0.0745712876197777	31.750387	112.76569	43.709308	21.267365	62.898689	68.12985	18.458774	28.4718889869173	32.475699	41.0832000263806	21.2601848025	47.001199	20.6878963787
ENSG00000225192.1	ZNF33BP1	-1.89104939523698	0.648070256283867	0.00352318541845367	0.0746663438598089	0.123025	0	0.0623362	0.0239973	0	0	0.0970705	0.0606174	0.206599	0.26718	0.22345	0.203652	0.0985188
ENSG00000180901.10	KCTD2	0.840089348542413	0.28793573148289	0.00352704868757196	0.0746663438598089	28.8507489	28.765577	25.142225	10.064514	26.017697	12.5061366	11.474615	21.5320171	14.43878	10.128861	14.5754253	10.280727	8.627126
ENSG00000233542.1	AL391845.2	-1.83683226037438	0.629569832303741	0.00352737748927527	0.0746663438598089	0.114608	0	0	0.0894232	0.0537255	0.0452111	0.248684	0.0847005	0.384885	0.447999	0.338256	0.108377	0.0458937
ENSG00000285508.1	AL034430.1	2.70738053985794	0.927784043712598	0.00352154441558048	0.0746663438598089	0	3.52593	0	1.63565	5.83915	5.55203	0	0	1.27748e-09	0.426615	0	0	0
ENSG00000006128.11	TAC1	2.56658800162264	0.879833089379069	0.00353267855367779	0.0746886402246429	19.255275	56.04137	12.039807	0.1717106	13.675978	0.0513217	0.1996078	4.845842	0.397875	0.338252	2.864437	0	0
ENSG00000125733.17	TRIP10	0.980028496123857	0.335974521868708	0.00353446747638136	0.0746886402246429	117.736036	218.62525	152.96452	45.901415	163.589834	101.139317	55.85534	119.882265	48.2451	76.242864	66.053893	102.012031	43.648794
ENSG00000272986.1	AC009570.1	2.00127220906281	0.686425985415255	0.00355123668643531	0.0749789691176124	0.460906	10.4382	1.96484	1.07848	0.686439	0.731489	0.072704	1.27403	0.710026	0.160391	0.251339	1.14372	0.588945
ENSG00000147434.8	CHRNA6	-2.48421795351811	0.852310727721122	0.00356046829947689	0.0750461915291631	0	0	0	0.023452	0	0.0237172	0	0.0225062	0.1474618	0.399079	0.082974100491027	0.0431658	0.1215786
ENSG00000267288.2	AC138150.2	-1.18775699394338	0.407507951862491	0.00356048611255759	0.0750461915291631	0.544792	0.286158	0.648858	0.378796	0.344837	0.57684	0.449284	0.653879	1.05953	0.983766	0.862853	3.405886	1.171
ENSG00000128272.14	ATF4	0.843849290257252	0.289574492708451	0.00356714590284615	0.0751225747795132	502.614528	821.828584	660.10751	308.351759	697.618014	269.144832	185.435542	454.10866	312.5415	291.68797	449.974316	322.14705	284.597686
ENSG00000146757.13	ZNF92	-0.977070619831824	0.335430352936783	0.00358104485246354	0.0753511521039204	1.9125938	1.76765382914631	1.623812	1.858655118666	2.214011	2.24381	2.16601688961	2.01203	5.1297321	4.413234	2.497092	7.032171	7.251673
ENSG00000231817.8	LINC01198	1.98902222322502	0.682946896757974	0.00358650105055587	0.0754018423925276	2.3768295	4.285229	3.3418122	0.1907873	1.947172101	0.4517364	0.2253509	1.98373	0.540633	0.1272818	0.2084472	0.0728672	0.0894373
ENSG00000018189.12	RUFY3	0.925039432725435	0.317724525465584	0.00359754164892261	0.0755056557273875	41.00908312968	86.68977	36.909208862	23.456959	44.398513	27.6045628	14.2427937	37.139228	26.50529649038	24.339113	29.0966335342	16.847054	24.939913
ENSG00000173451.6	THAP2	1.35956736731662	0.466935037945267	0.00359485892377786	0.0755056557273875	14.92173	21.53874	3.67813	2.049061	15.06382	4.762526	3.756935	2.42519217	4.166236	5.21239	2.75965	5.513314	4.537453
ENSG00000166278.14	C2	-1.67332745864476	0.574856314154483	0.00360433054619634	0.0755144162637887	17.3772876	6.82893	6.5432634	16.8894773	53.650185	13.561477	26.626767979	19.435836	179.153938	53.0131606	21.629998	155.166215	116.6740166
ENSG00000269489.1	AL589765.6	-2.07345952408014	0.712319178387355	0.00360438522387118	0.0755144162637887	0.287763	0	0	0.224385	0	0	0.453793	0.284513	1.38914	0.375997	0.261725	0.968312	0.573232
ENSG00000134627.11	PIWIL4	-1.21589907819615	0.417745605473634	0.00360711416543941	0.0755144162637887	4.1297698	1.926635	5.0176282	4.1238251	2.197152	2.193302	11.368312	4.461165	7.73837	6.405447	6.837896	20.6030896	2.757117
ENSG00000161921.14	CXCL16	-1.34028694587805	0.460704942912072	0.00362344588972329	0.075792196569064	26.774498	14.557744	17.506628	48.26848	34.809268	33.661831	105.377584	27.944916	48.43767	113.7704	40.996856	211.98619	70.356216
ENSG00000204371.11	EHMT2	-0.642731583708665	0.2210388139715	0.00364007785237364	0.0760757824805623	45.64624729	23.22509341	28.94721474	29.8976205	13.9792628405	26.69852966	32.073905442	40.079416926	62.7132911	49.104593	42.9144415191	65.73040507	44.61094822
ENSG00000146049.1	KAAG1	-2.67848887564089	0.921535380873662	0.00365438218931251	0.0763102846198633	0	0	0	0	0	0	0	0.0961279	0.24507	0.576308	0.278166	0	0.0340301
ENSG00000145335.15	SNCA	1.52517260980054	0.524963520476909	0.00366909970746597	0.076503323704682	10.818598	12.0955980079109	13.2853030002032	1.3344499590796	7.24911	5.625479	1.232874359	6.7458160133618	1.8806250124372	1.763221	6.168807682	1.3749156	0.8614333
ENSG00000232450.1	AL133517.1	-1.34681140724688	0.463581363716512	0.00366980987017408	0.076503323704682	0.825093	0.266179	0.651354	0.715056	0.0853403	0.145491	0.650758	0.814526	1.14745	1.51536	1.5831	1.22488	1.90365
ENSG00000115361.7	ACADL	2.21881990318865	0.763829610415383	0.00367414604620072	0.0765292457182128	2.4774435	0.269431	0.7038794	0.6579091	7.6254392	0.4899632	0.419161	0.232449	0.2057658	0.306172	0.943193	0	0.0171839
ENSG00000186827.10	TNFRSF4	-1.30446801060045	0.449248152866953	0.00368817658342495	0.0767568793581584	5.11416	2.189399	1.914301	6.711	6.472441	2.366658	6.58224	6.13927	9.27387	31.34054	7.15459	11.02002	13.5109
ENSG00000156671.13	SAMD8	0.727543251287076	0.250606696337374	0.00369455910946069	0.0767768697738682	6.337053	8.6449077	6.754552	3.576986	10.573053	9.7229325	3.482309	5.4586612	5.4277038	5.5091202	4.0905622	6.911717	4.737768
ENSG00000092148.12	HECTD1	0.523395603729606	0.180290921680999	0.00369534257024356	0.0767768697738682	57.665865423	75.968590335	56.66861416	53.2301070001301	54.8412039	62.4629230003843	39.821176	51.54052644026	36.4228406716	42.800728	45.4452270141519	68.402999	38.0678202
ENSG00000071539.13	TRIP13	-1.68649208510787	0.581264763765701	0.00371477913710003	0.0769223512531719	0.927141	0.830764	0.495027	4.010773	0.802366	6.1473403	4.801742	2.393882	14.247882	7.319743	9.351231	14.594108	14.493752
ENSG00000246089.3	AC016065.1	-1.19775036549139	0.412798796573414	0.00371338693840494	0.0769223512531719	1.48012	1.1136701	1.309951	2.916645	1.0220484	1.959853	3.535722	1.9641239	3.829557	3.530081	9.020898	2.716173	5.423534
ENSG00000181126.13	HLA-V	-2.02602073698139	0.698251516805602	0.00371306158979842	0.0769223512531719	0.1929559	0.04113625	0.068849	0.1299475	0.0609296	0.102955	0.111737	0.456414	0.1656769	0.418795	0.0692262	3.191856	0.0785718
ENSG00000055609.17	KMT2C	0.441385123079058	0.15209123244423	0.00370661191014714	0.0769223512531719	13.462174	11.389128	13.454647	10.5477581	7.402106	10.2644424	6.3750334	12.24612	11.0338315	8.0123002	7.9023272	8.58772	8.4520233
ENSG00000105327.17	BBC3	-1.33297832611296	0.459472750720609	0.00371850207599023	0.0769350617645304	4.555196	2.181087783	4.361073	9.744687	1.672236	3.350331579966	13.190489	3.883397	9.69627	24.55539	8.556931	17.271414	12.367896
ENSG00000142408.4	CACNG8	-1.39891034449574	0.482433258389616	0.0037352336314027	0.0770813828194602	0.170525	0.0397554	0.0714611	0.165182	0.055272	0.0324065	0.361932	0.383841	0.185951	0.19909	0.074738	0.509813	0.188559
ENSG00000273576.1	AC009283.1	-1.18496889207411	0.40861640366855	0.00373217083800715	0.0770813828194602	13.7713	4.918	9.1705	7.13056	5.03161	7.44862	22.9663	14.1608	54.8358	12.1831	12.93	8.96835	14.8607
ENSG00000204642.13	HLA-F	-1.26276052883469	0.435499676878065	0.00373678371201484	0.0770813828194602	128.613662	77.372441	70.57739	175.218481	74.500234	145.655116	145.270287	132.24059	291.137686	258.345166	151.75466	850.57931	437.98848
ENSG00000254721.1	AP000879.1	-0.772047085666116	0.266272514197426	0.00373803432545372	0.0770813828194602	6.6197	3.878053	4.34496	8.53899	7.14868	4.6879237	11.53146	11.02954	16.21047	7.72828	11.90963	10.64104	9.28551
ENSG00000185274.11	GALNT17	1.55422162556051	0.536151948927049	0.00374539489595004	0.077108675359974	7.95314	5.68093	2.064039	1.380592	3.1707751	1.324134	0.465385	1.954215	0.5484204	1.195078	3.0833374	0.641179	0.272084
ENSG00000268061.5	NAPA-AS1	0.798374914731567	0.275412896648733	0.00374559013064008	0.077108675359974	2.37456	1.658649	3.76213	2.60242	3.49017	2.54614	0.930559	2.442089	1.914808	1.937303	1.380931	1.231344	2.28058
ENSG00000196747.4	HIST1H2AI	-2.21697275736533	0.76510516042415	0.003760235019234	0.0773458150880676	0	0	0	0.387403	0	0.613959	1.45713	0.491539	0.416771	2.16511	0.452048	4.70619	0.698134
ENSG00000152954.11	NRSN1	2.67361850484156	0.923124995451877	0.00377628288756978	0.0774927792238987	2.216449	0.393373	1.8350468	0.0182048	0	0	0	0.0459743	0	0	0.1153423	0	0
ENSG00000049768.14	FOXP3	-1.87125871950657	0.64633384214359	0.00378930138860042	0.0774927792238987	0.8576322	0.187321	0.270939	1.88073821027	0.2690641	2.564379294	0.88925	1.1275141	4.4716421	14.32692	2.817012	4.832669	8.5939644
ENSG00000009765.14	IYD	-2.46739579448405	0.852189694711335	0.00378724149074976	0.0774927792238987	0.0637833	0	0	0.5041389	0	0.3906484	5.068448	0.1025168	5.288857	1.704265	0.5395672	1.155343	1.710996
ENSG00000170345.9	FOS	1.96092497832234	0.676960512911567	0.00377157306699251	0.0774927792238987	1317.968548	201.873735	1558.379268	69.05761	1356.771657	566.777559	99.05619	68.8004	120.50322	257.81245	9.512569	715.684192	48.055611
ENSG00000123243.14	ITIH5	2.01564661030803	0.696149600853888	0.00378649568086447	0.0774927792238987	80.339749	91.1574044	92.200516	6.1366327	184.716949000429	6.3056115	0.5885846	34.1107413	4.6006744	10.4995619	41.3364999	12.2643032	7.8070586
ENSG00000272769.1	AC097532.2	-1.66317139385478	0.574430076349474	0.00378745920124444	0.0774927792238987	1.59379	0.196658	0.171837	0.291039	0.0635476	0.160604	2.00671	1.37023	1.5297	0.382987	2.37137	1.12323	1.3576
ENSG00000246375.2	AC107067.1	1.94737470687365	0.672417564544716	0.00377856693184175	0.0774927792238987	0.10369	0.33408	0.0350298	0.10787	0.0971498	0.136422	0	0.0681288	0.0331747	0.0300284	0.0627805	0.0654268	0
ENSG00000102313.8	ITIH6	-2.56331075334908	0.885608442927856	0.00379876135009089	0.0776220888587935	0	0	0.0106761	0	0	0.0166045	0.282798	0	0.0505174	0.0274556	0	0.129224	0.0337935
ENSG00000175581.13	MRPL48	-0.766825446377036	0.265022031949375	0.00381046635364109	0.077797021386839	17.350318	14.714859	18.826488	20.961964	15.72155907	26.756581	27.9132645	18.20981788	50.485227	41.710864	30.029162	47.688112	39.701492
ENSG00000050628.20	PTGER3	2.14831742249855	0.742748251034014	0.00382323348334002	0.0779933326836347	15.825859	6.5902962	7.593138	0.836730020453673	63.8953948	1.117983	0.2559854	9.5445094	2.696671	2.716152	3.882644	0.46277398	0.685989
ENSG00000224032.6	EPB41L4A-AS1	0.935648912342222	0.323525238121322	0.00382745512946991	0.0780151377090057	51.394219	84.32509	48.41274	29.36356	43.29189	30.48865	14.176896	46.469966	32.14064	25.95137	38.55329	17.05199	16.41632
ENSG00000103472.10	RRN3P2	-1.29860772502455	0.449264172653117	0.00384603291068407	0.0783292875513394	1.06917	1.0275	1.234563	0.781082	1.013896	0.611194	0.845701	0.64163058	3.35683	4.078014	2.27617	1.768584	5.770951
ENSG00000117054.13	ACADM	0.683318879545262	0.236553019014729	0.00386899443124956	0.0785383652184334	34.77733856	29.191852	38.1357035	13.702870508	33.232336	35.2361638	13.268240339193	30.930394	19.0428617	17.2783490005387	24.956043	22.899961	17.2759518
ENSG00000269825.1	AC022150.4	-1.27767740057795	0.442195330208065	0.00385982709178478	0.0785383652184334	0.588351	0.421755	0.442231	0.162899	0.2672	0.658262	1.48261	0.785253	0.655224	1.17024	0.292967	1.88171	1.6879
ENSG00000166292.11	TMEM100	2.14686157969033	0.743178017373577	0.00386766375305486	0.0785383652184334	85.119754	65.697171	96.179196	7.1457434	24.491564	3.1480111	3.843358	28.986579	1.28654852	1.670408	16.548087	0.430322	1.00035301777
ENSG00000171960.10	PPIH	-0.664356836737993	0.229968521782116	0.00386587855507063	0.0785383652184334	29.861247	22.434522	28.20469	34.452224	24.379366	37.084878	40.001163	32.663736	47.684086	55.31358	62.961352	69.979084	53.758569
ENSG00000105227.14	PRX	1.14312907470931	0.395802768368726	0.0038754207918503	0.0785399569978178	3.81009	3.030658	3.344527	2.388047	2.723033	1.065717	0.3188981	2.949929	0.951404	1.045614	1.878634	0.985543	1.054497
ENSG00000135638.13	EMX1	-2.64104417708194	0.91440030979647	0.00387354822755949	0.0785399569978178	0	0	0.0377139	0.0816025	0.017471	0	0.1037787	0.0366724	0.0535493	0	0	2.928168	2.6784463
ENSG00000114631.10	PODXL2	-1.41558758328047	0.490409967073801	0.003895042503728	0.0785978510680883	4.25127	2.37197	3.76915	8.9838	5.12651	4.13147	19.5478	3.76489	15.0267	8.35226	12.1561	43.1468	6.68888
ENSG00000164764.10	SBSPON	2.07392066747869	0.718412790154881	0.00389170124521086	0.0785978510680883	65.8828	48.5405	13.076295	2.091015	1.75629	2.371669	0.792928	10.6162	1.49859	5.97078	7.34027	0.842781	1.10727
ENSG00000146410.11	MTFR2	-1.50629021617669	0.521678718493412	0.00388451693990396	0.0785978510680883	0.601209	0.768169	0.859032	2.542951	0.97422	3.606742	5.405401	1.0819337	5.71292	4.436711	4.10235	11.895488	6.846437
ENSG00000109320.11	NFKB1	0.83872939456036	0.290486418457115	0.00388529712491972	0.0785978510680883	20.121749	40.761217	22.230526	12.783951	37.9740804	18.583188	12.6744988	17.5834503	21.387171	20.008285	11.8827702	14.026929	11.6291291
ENSG00000114784.3	EIF1B	1.16560098932528	0.403831613660962	0.00389733535100199	0.0785978510680883	103.5216	149.29389	102.913365	35.35084	241.71877	38.552451	33.586087	82.479051	57.46876	52.77962	62.00644	50.447018	33.715885
ENSG00000046653.14	GPM6B	1.86646569255227	0.646547090512858	0.00389155606298371	0.0785978510680883	20.949305	16.39667	44.728951	3.031186	4.491687	3.6850846	0.7403985	13.315005	4.157269	1.028066	4.527386	2.030608	0.676179
ENSG00000156875.13	MFSD14A	0.711770400321457	0.246629910447849	0.00390189857497373	0.0786257982391896	30.1248	46.596	34.7974	13.536	33.0868	21.1857	14.1113	26.2044	20.337771	21.2544	20.4816	21.6686	15.166724
ENSG00000204366.3	ZBTB12	-0.886969164984221	0.307371976839168	0.00390601350805301	0.0786446739273977	3.18036	1.07289	1.27699	1.07686	1.04064	1.94132	1.39675	2.66096	5.38382	3.88347	2.42501	4.56884	2.88332
ENSG00000197083.11	ZNF300P1	1.60386310906964	0.555918573003928	0.00391328626228041	0.078663093875003	7.37412	4.76127	4.615637	0.60437	6.65041	0.4890083	0.562285	1.373991	3.33007	1.588037	0.956689	0.439642	0.87032
ENSG00000188869.12	TMC3	2.29116003551281	0.794127405307996	0.00391253261404837	0.078663093875003	0.701398	0.054647	0.664086	0.0441521	0.01062865	0	0.00892815	0.0780024	0.0433915	0.00982378	0.0205452	0.01067134	0.0465958
ENSG00000129195.15	PIMREG	-1.64013233618353	0.568827592607242	0.00393462749874464	0.0789219499426424	1.3473962	0.381627	0.562973	1.660202	0.295734	3.0192041	3.065985	1.305335	5.455986	2.175181	4.42096	15.153591	3.577793
ENSG00000146574.15	CCZ1B	-0.604912301247312	0.209800971513457	0.00393573191469875	0.0789219499426424	40.641617	33.907432	40.855749	41.6614	32.463551	32.336313	52.235913	44.816208	64.5649	68.6170382	95.402716	57.389323	47.641454
ENSG00000126218.11	F10	1.88412502770757	0.653465384503581	0.00393554856611168	0.0789219499426424	11.87619	28.904079	7.689845	3.015969	46.55991	2.740756	2.922957	5.61622	9.051374	2.323244	1.576815	0.26659	6.6042252
ENSG00000278925.1	AC005753.1	-1.88589083487075	0.654152113715595	0.00393964236742483	0.0789363970703866	0.360494	0	0.488209	0.374839	0.222995	0.095598	2.17944	1.30596	0.926933	0.313828	0.437007	3.22402	0.19169
ENSG00000163071.10	SPATA18	1.23473108383559	0.428325830006202	0.0039429381348188	0.0789385146813035	1.894729	2.1382387	1.27385	3.799514	2.284333973458	4.2878889	1.6095983	0.9589909	1.536696	1.0906268	1.9529641	0.5307793	0.467983
ENSG00000248329.5	APELA	-2.63892773617115	0.915959229443422	0.00396348093774535	0.0791440840992609	0	0	0.0211976	0.0163255	0	0	0.0705071	0	0.741346	0.181711	0.85916	0	0
ENSG00000266964.5	FXYD1	2.03009480501071	0.704503831902179	0.00395667787434321	0.0791440840992609	210.815273	336.766432	216.893856	39.839545	190.751331	23.604282	11.348135	147.4264897	15.989152	21.5836947	42.27033	2.22728	1.95522
ENSG00000135914.5	HTR2B	2.17652959278475	0.755515550500494	0.0039659997689668	0.0791440840992609	28.7241	1.98797	7.05416	0.271834	0.714223	0.403736	0.0969082	1.46548	0.515744	1.45076	2.5587	0.238565	0.275458
ENSG00000131389.17	SLC6A6	-1.21091305499181	0.420318938756353	0.00396492871118246	0.0791440840992609	7.278224068	3.1657191	2.23796890878962	14.5479557579599	6.5457280515325	9.2718057	10.8041460737919	19.11427796	28.000937636	29.230209859459	9.52122555122	23.59881326	21.0385619820827
ENSG00000213889.10	PPM1N	-1.6167570404354	0.561315037040529	0.00397293923976334	0.0792186796840805	1.195859	0.4466534	0.845218	1.8620037329	1.7441218	2.777782	6.89415	1.817819	0.823158	2.9377895	9.759723	12.172261	5.099382545329
ENSG00000203811.1	HIST2H3C	-1.70996564116712	0.593970717180007	0.00399100335726028	0.0793935887686502	0.293396	0.0667242	0.174908	0.0807914	0.0646779	0.136241	0.381481	0.102053	0.347901	1.73667	0.156736	0.962681	0.248778
ENSG00000237152.3	DLEU7-AS1	-2.32545853074255	0.807774655133957	0.0039913366105557	0.0793935887686502	0.0312924	0	0.126848	0	0	0.0493894	0.345669	0	1.29127	0.0815526	0.17051	0.20722	0.225527
ENSG00000203852.3	HIST2H3A	-1.70996564116712	0.593970717180007	0.00399100335726028	0.0793935887686502	0.293376	0.0667242	0.174908	0.0807914	0.0646779	0.136227	0.38134	0.102053	0.347808	1.74183	0.156736	0.964745	0.248671
ENSG00000277383.1	AC010331.1	-1.42383062084275	0.494764056985184	0.00400462484561616	0.0795939291604594	1.57771	0.891397	0.534322	1.33281	0.243675	1.25643	4.97622	1.55931	3.17127	2.51873	0.836884	3.40702	4.61182
ENSG00000228439.5	TSTD3	0.85903258631147	0.298558320107123	0.00401133537724196	0.0796633177446648	3.6339742	2.467482	2.87607	2.49894	2.64722	1.46166	0.84744	2.86211	1.7752	1.72	1.79737	1.37938	0.632691
ENSG00000132530.16	XAF1	-1.02302823505713	0.355671649622865	0.0040233171863516	0.0798371962921173	89.274281	13.477843	26.085809	33.3516892	21.4189794	36.757315	46.1355566	83.9404118	89.82153	84.887626	51.856111	105.834371	108.722591
ENSG00000152049.6	KCNE4	2.04595613315915	0.711540991193471	0.00403531809584411	0.0799471147171037	61.217004	63.776465	51.51787	2.140601	7.8056391	0.948177	1.8778116	11.943636	5.131155	8.4343308	12.018651	1.16633	0.7472458
ENSG00000109171.14	SLAIN2	1.01105061683721	0.351612182615664	0.00403425266638999	0.0799471147171037	37.36645	35.113321	42.65201	11.34924	23.143984	30.885965	6.856866	23.664087	16.384913	14.904639	28.755991	14.22644	7.09331
ENSG00000280287.1	AC131212.3	-1.339805924448	0.46601474191444	0.00403990316260344	0.0799739230068976	0.425166	0.144959	0.455991	0.790362	0.692981	0.531967	1.02623	0.468022	1.42653	1.35725	0.931008	1.78124	3.49766
ENSG00000234745.10	HLA-B	-1.19990289601119	0.41750397015989	0.00405319765091717	0.0801729623276941	1219.9344652	598.265421	617.65211	1248.8998989	1454.5451977	1285.72414	2071.05147	835.562177758269	3119.159626	2695.923397	1379.05133	6636.880203	3540.9668
ENSG00000143641.9	GALNT2	0.890914814275109	0.310031498834559	0.00405788190258361	0.0802015077311753	60.783713	89.69436	58.90947	22.794757	60.909281	23.409457	22.082309	45.818292	31.300681	31.426794	30.579409	33.663243	19.683392
ENSG00000250292.1	AC093844.1	-2.65208157709874	0.923009874031311	0.0040621193565382	0.0802211839405729	0	0	0	0	0	0	0	0.256029	0.083133	0.413759	0.432474	0.0410226	0
ENSG00000126583.10	PRKCG	-2.04132109541057	0.710660120459406	0.00407328950483036	0.0803135846988266	0.1050929	0.135227	0.1722656	1.31027	0.400439	0.108036	3.31261	0.15191	0.903676	0.58032	4.69866	6.5348	0.659035
ENSG00000011198.9	ABHD5	1.15470834343781	0.401988612217092	0.00407250728093736	0.0803135846988266	12.833266	17.160778	10.792979	9.048341	52.89469	16.478966	7.7435299	13.255890065148	9.7032180289068	9.266295817	8.18591511317	14.0992525	5.8809326
ENSG00000137343.17	ATAT1	-0.718584122620972	0.250242348078835	0.00408460502503039	0.0804725727264148	9.884652051665	7.3939433	13.08595929941	9.6973794	9.522398	9.89515	19.71129575904	12.8516701741981	26.350597	20.0390620736	9.1782348	21.31320898	16.388753
ENSG00000148926.9	ADM	1.88350896158502	0.656117102170882	0.00409576660916662	0.0805641850109921	15.63750032	132.40882	7.863011	8.2866669	154.0730026322	14.45361	22.69686	10.586592	29.14757	9.143193	5.498292	11.720133	5.037046
ENSG00000259494.1	MRPL46	0.709309938522027	0.247082438813943	0.00409509586833849	0.0805641850109921	21.708396	21.125715	23.140108	15.949058	31.6729847	24.429313	8.554984	24.949026	17.633401	15.893847	19.756144	11.4333195	11.023391
ENSG00000186480.12	INSIG1	1.42516766103775	0.496527616564077	0.00410123164922156	0.0806076069578932	20.356011	33.616827	20.084326	20.06038761	154.59986	44.3983919416	14.8476173	15.227626	42.57967	16.2910461	12.1774136	19.529556	14.852644
ENSG00000163602.10	RYBP	0.798335220241437	0.278254284591517	0.00411661031326533	0.0808148582907574	10.8969	17.9086	10.7677	4.88603	11.9718	5.58478	4.07049	6.08157	7.44269	6.58687	6.75804	8.58297	5.73163
ENSG00000186376.14	ZNF75D	-0.913127601046288	0.318278853079796	0.00411830819578279	0.0808148582907574	6.843962	2.08151	4.801456	6.272124	3.177054	4.3708079	8.465645	7.525819	10.0883	8.218515	5.17658	18.160264	9.931125
ENSG00000183598.3	HIST2H3D	-2.40523113406515	0.83863143349514	0.00413019206445766	0.0809303412871617	0	0	0.240082	0	0	0.189314	0.742272	0.233557	0.290372	1.79543	0	2.0409	0.477432
ENSG00000198246.8	SLC29A3	-1.17924185373219	0.411171963851199	0.00413073433201395	0.0809303412871617	4.48711882259	1.1237286	3.1020509	6.160146357	3.9461781	2.1044355001897	8.9783227	3.3633488291	8.8457664	10.6251395032524	5.48564583	12.9292402901393	12.48179159
ENSG00000241935.8	HOGA1	1.90009904453443	0.662609162562029	0.00413596082866263	0.0809686318870702	0.1328493	0.3208729	0.08328708022	0.108983	2.3165231	0.8571381	0.0440845	0.17312	0.2095303039	0.32503	0.106474	0.2377241	0.0671208
ENSG00000099251.14	HSD17B7P2	-1.14728475025648	0.400153382552634	0.00414235782281005	0.0810276922083098	3.84332	0.693174	2.67196	3.9448993	1.028256	3.03293	5.26429	3.593874	10.6476	5.12694	5.073264	9.9526379	5.61368
ENSG00000168806.7	LCMT2	0.763713154070554	0.266392628237308	0.00414552670582825	0.0810276922083098	3.88589	6.68181	2.764599	2.361351	4.68951	4.57297	1.680409	3.27768	3.33578	2.499728	3.32565	2.299656	2.45286
ENSG00000197748.12	CFAP43	-1.53095028400422	0.534131503758775	0.00415376252277189	0.0810606101151345	0.347034	0.2310982	0.1464475488	0.4411747	0.0686199	0.1872354	0.926576	0.412429	0.383438	1.1905913	0.5264458	2.4046630011619	0.220475
ENSG00000224470.7	ATXN1L	0.636580214886443	0.222079247239046	0.00415096895526185	0.0810606101151345	15.15035	16.110884	13.152033	6.759622	12.988118	8.574959	7.380609	12.429988	8.572977	9.985707	7.251243	7.762395	5.655795
ENSG00000104951.15	IL4I1	-1.56452554331649	0.546055868547004	0.00416827249050714	0.0812796712195424	4.134112	1.66476	1.13529628	1.479863	3.8543646	3.1917621	1.680105	2.265917	6.447464	13.7297	3.81471	12.153523	24.4643676
ENSG00000171812.12	COL8A2	1.95623444674871	0.683306412694308	0.00419789778301319	0.0817907023859561	40.31702	54.6225498	22.46215	1.163453	4.779771	2.265196	0.336164	5.256373	8.41704	6.195761	7.520903	1.205488	2.712483
ENSG00000269867.1	AC010326.3	-1.40419947247098	0.490523643590733	0.0042010904317054	0.0817907023859561	6.36061	1.45451	2.85671	8.74606	3.9245	6.11128	22.5455	6.41011	14.3182	26.9965	3.87002	13.4169	18.3699
ENSG00000224609.7	HSD52	1.39356992700123	0.486982849890677	0.00421454434936722	0.0819237234289802	0.79844	0.3327674	0.6056492	0.222723	0.634178	0.1691017	0.0600623	0.318683	0.397789	0.0495778	0.229154	0.130839	0.0665193
ENSG00000115267.6	IFIH1	-0.966624166348108	0.337782850365274	0.00421411037895109	0.0819237234289802	12.829712	5.0959787	6.870477044722	7.015394	7.11076135406265	8.810021134198	9.17462	9.087167	14.996786	17.567577	10.758564	38.479633	22.430379
ENSG00000010818.9	HIVEP2	1.19124896843569	0.416492047299908	0.0042337899321677	0.0821687308795997	5.460455	20.218592	5.93824272	3.543682805	10.5424792	2.9551158006	1.816127072	4.382470357	5.39669579	4.713326	3.9960498	3.123197	3.3732806
ENSG00000274370.1	AC130371.2	1.36371209383763	0.476767421402021	0.00423200561579658	0.0821687308795997	2.81082	2.01184	1.24136	0.953034	3.40105	1.36139	0.578217	1.93202	1.06066	0.531972	0.777796	0.117137	0.487335
ENSG00000122565.18	CBX3	-0.60177958229025	0.210450867967797	0.0042433913467572	0.0822310055206799	72.004954	72.54415	63.181351	66.574278	69.37009	78.404462	60.426503	87.771332	142.815792	142.13153	100.912974	191.073203	121.48349
ENSG00000101349.16	PAK5	2.28964820563808	0.80072780884815	0.00424364494038829	0.0822310055206799	0.303881	0.959673	0.165738	0.0547197	0	0.10372	0.00922278	0.0690674	0.0448152	0.0507411	0.0848937	0	0
ENSG00000115718.17	PROC	-2.02118623205755	0.707193171419426	0.00426266918746959	0.0825350149013576	0.3634618	0.0350485	0.2220066	1.001434	0.25518	0.706295	6.238872	0.1368177	2.97209	4.622897	0.7796685	0.629446	1.70773
ENSG00000167193.7	CRK	0.613410923187851	0.214742735004945	0.00428350682059377	0.0826985428926741	30.85752	35.9915	31.050662	23.28053	49.801532	27.7276	17.86494	32.296793	26.56245	25.34697	21.10263	31.1338	14.593061
ENSG00000205302.6	SNX2	0.408203932421295	0.142889078849325	0.00427950372219693	0.0826985428926741	50.258928	35.487893	45.670704	32.776346	45.163796	35.709472	20.778963	39.2464159	30.424755	36.1319622	41.151938	34.844989	32.6882713846
ENSG00000277954.1	AC092376.2	1.33681045391748	0.46797354586633	0.00428213099293955	0.0826985428926741	0.74436	0.805853	0.883977	0.130184	0.349564	0.16177	0.111398	0.417134	0.221458	0.278591	0.221396	0.0968574	0.0925686
ENSG00000188157.14	AGRN	-1.08609730801805	0.38023028962222	0.00428448300619956	0.0826985428926741	32.906329	10.07757	17.502647	27.3805752	16.34319	24.5258775	33.5519556	29.070436	40.3609075	89.972356	34.841872	115.191451	27.448248
ENSG00000176083.17	ZNF683	-2.05362590651957	0.719049669426486	0.00428977456909862	0.082736143189669	0.761094	0.1577025	0.103945	3.233122	0.3186512	0.478355	0.6919483	1.191767	4.723556	4.479303	1.488285	7.106036	18.807718
ENSG00000198300.13	PEG3	1.80860264020941	0.633368365402254	0.00429650055314791	0.082747696271074	7.352893199596	1.94160010725294	7.04521150956014	0.617912322435	4.02356000648484	0.660054197541	0.6262894	2.073029243205	0.513664375011	0.40428688375778	2.03970620728	0.08036590647425	0.312271227582372
ENSG00000145075.12	CCDC39	-0.756029835929919	0.264763704332468	0.00429706161682482	0.082747696271074	0.453509	0.226157	0.366931	0.313652	0.120111	0.409054	0.494441	0.770742	0.650816	0.49273	0.429362	0.702538	0.568517
ENSG00000176753.5	C15orf56	1.51496981508988	0.530642391151579	0.00430404582622417	0.0827533908080164	0.54145	0.0755291	0.158392	0.264263	0.1126711	0.424048	0.041114	0.1525317	0.0499884	0.0665711	0.1405589	0.147761	0.0417351
ENSG00000156504.16	FAM122B	-0.739825539196236	0.259130532793723	0.00430327146092354	0.0827533908080164	16.75052	13.820006	17.0068014	15.528250344394	10.490598116	15.136654	17.5528382	20.893646	31.328393	23.809598	16.7907003092	56.518853	28.286564
ENSG00000179833.4	SERTAD2	1.03179706090712	0.361480902792097	0.00431234718878114	0.0828486266975073	10.0221323	9.866088	6.8737608	8.550949	31.75575	13.50028	4.117906	10.609271	8.273443	7.272304	6.744922	6.2583544	7.348019
ENSG00000175315.2	CST6	2.15004580616571	0.754224275359746	0.00436269870486241	0.0829485226226176	0.269623	2.43538	0.638515	0.280402	0.0836791	7.05901	0.212656	0.443593	0.0865211	0.86003	0.163361	0.428741	0.0717828
ENSG00000173821.19	RNF213	-1.18907383357478	0.417112522421239	0.00436194341459047	0.0829485226226176	61.202803	24.320771	33.371032	59.20563	35.829251	64.73708	48.963786	59.1930493	110.595372	152.225698	50.2119483	228.564143	216.241001
ENSG00000147465.11	STAR	1.65203593562707	0.579604809010412	0.00436807710332047	0.0829485226226176	0.2530949	0.1363652	0.5587514	0.173686	0.5483425	1.5014474	0.2252026	0.2458194	0.1487093	0.0403091	0.2839561	0.1127607	0.0732399
ENSG00000130675.14	MNX1	-2.37219745665546	0.831827273820119	0.00434736865167079	0.0829485226226176	0.070782	0.0684172	0	1.219303	0	1.624395	5.67659	0.2457206	15.60194	5.48706	0.790397	10.40486	4.559794
ENSG00000128045.6	RASL11B	1.90724317373032	0.669156104236222	0.00436887803243942	0.0829485226226176	17.252632	4.18243	12.09329	1.406797	0.368649	0.517483	0.684832	1.647675	1.22702	1.623339	2.88789	0.217135	0.506102
ENSG00000264044.1	AC005726.2	-1.83624220094155	0.643631702469206	0.00433168900371101	0.0829485226226176	0	0	0.126646	0.1829202	0	0.0938442	0.23252	0.251591	0.323468	0.100732	0.219105	0.460209	0.603845
ENSG00000226453.1	LINC02542	-1.9777162669893	0.69336412896679	0.00433974671251417	0.0829485226226176	0	0.0781566	0	0.315036	0.0752854	0.448222	1.33797	0.0797161	1.39902	1.05382	0.513831	0.615732	1.09721
ENSG00000175455.14	CCDC14	-0.793558804268742	0.278356352807961	0.00435992843659209	0.0829485226226176	20.1047192	9.4620722	22.002248	14.4119487	6.2650779	13.554105	19.274908	20.745352	24.015779	31.907062	22.313911	39.027005	31.977377
ENSG00000281706.2	LINC01012	-2.11673819825987	0.741749656555092	0.00432119967872261	0.0829485226226176	0.0195475	0.0188866	0.1271815	0.2643866	0	0.5657854	0.836833	0.1429575	3.121211	0.6370875	0.5129409	0.6022925	2.400563
ENSG00000159348.12	CYB5R1	0.630550941668692	0.221201307915901	0.00436402425211652	0.0829485226226176	43.522221	37.2670081	43.399183	30.528944	42.582285	48.76164	32.816667	37.922752	27.40067	24.009809	34.015736	25.892731	17.4792
ENSG00000205037.2	AC134312.1	1.54912892588879	0.543413918147694	0.00436183430575159	0.0829485226226176	0.246056	0.34171	0.0934697	0.0959975	1.03967	0.121182	0.0728098	0.136331	0.103214	0.0801246	0.0698166	0.17416	0.123234
ENSG00000119888.10	EPCAM	-2.2905729851144	0.802901590488086	0.00433264904676241	0.0829485226226176	2.4732	2.750922	0.580985	115.290842	0.9043678	52.9382807	398.730346	21.097923	755.840569	251.571828	67.010575	343.739474	233.970339
ENSG00000135241.16	PNPLA8	1.01286869081624	0.355141927279755	0.00434435942886867	0.0829485226226176	16.802993	39.215807	21.751711	6.731299	30.629872	10.98067624	6.83296035975	13.636318	12.514924	11.06235829619	13.488991	13.590485493	7.900629
ENSG00000137270.10	GCM1	-2.03029616619501	0.711611246121065	0.00432953550270105	0.0829485226226176	0	0.0757233	0.0396998	0.0611525	0.0551654	0.0154455	0.0773022	0.135113	0.187902	0.561522	0.0177911	0.888129	0.0627919
ENSG00000130475.14	FCHO1	-1.26276374920246	0.443044834094411	0.00436925635184871	0.0829485226226176	1.5573498	1.26837478933921	1.32434500149841	5.3171004091	3.0103027	3.28227278088389	4.918883	3.7864530459672	6.97450505137783	10.1117712526843	4.1149439	9.4815712	13.6890849469
ENSG00000174444.14	RPL4	0.738341433894903	0.259062263077676	0.00437118098605348	0.0829485226226176	2147.710993	2900.48294	2441.149736	1569.537611	1664.875977	2013.592647	671.837293	2062.707382	1707.965361	1561.405705	1800.174457	824.559708	1168.88614
ENSG00000125355.15	TMEM255A	1.26761083932295	0.444891834219685	0.00438215698898056	0.0830294599481807	3.380364	2.21123	3.407209	0.6015731478672	2.148142	1.06467	0.118421	1.33056062689	0.689611	0.93426	0.791092	1.594177	0.9619537024
ENSG00000220205.8	VAMP2	0.666418773503549	0.233885151591845	0.00438097666873504	0.0830294599481807	117.67681	80.48074	94.18691	56.02236	79.87854	45.93022	33.886565	91.20124	51.290486	51.89961	62.24095	43.9398	41.107393
ENSG00000245385.2	AP003396.1	-2.64723811327849	0.929206970208693	0.0043867643671985	0.0830531631724001	0	0	0	0	0	0	2.25012	0	0	2.30843	3.73862	0	5.91103
ENSG00000249395.2	CASC9	-2.63424976240787	0.924854698383233	0.00439555422536913	0.0831559551274918	0	0	0	0.40671	0	0	3.13048	0	18.171966	3.32786	2.791491	0	6.878543
ENSG00000276934.1	AC009704.2	-1.50155945827401	0.527277235895217	0.00440279990534298	0.0832293992801467	0.354411	0.343549	0.180249	0.414515	0.490378	0.141698	0.419213	0.876828	1.02841	1.69931	0.483797	1.53976	1.2694
ENSG00000283496.1	ZNF511-PRAP1	-2.57475090809962	0.9045526579924	0.00442116677412344	0.0834787193657806	0	0	0	0.0631613	1.11823	1.04725e-09	7.06728	5.02324	17.0475	0	0.391856	1.97475	5.58826
ENSG00000139112.10	GABARAPL1	1.41764002676268	0.498060202121874	0.00442273595023392	0.0834787193657806	192.625872	211.821754	141.644643	28.165398	166.958274	19.6011792	22.69107	74.8435997481	39.079086	59.685328	74.3125074361109	19.194276138087	37.9047970015786
ENSG00000230387.2	AL118508.1	1.78069377344092	0.625713904223561	0.00442917514585687	0.08353653885993	1.085771	0.4006155	0.3215788	0.2309621	0.09182919	1.203523	0.0369744	0.35649	0.1901548	0.1717528	0.269125	0.0942849	0
ENSG00000179604.9	CDC42EP4	1.48572115568078	0.522285750968815	0.0044459980922367	0.0837899640459993	59.084528	121.000066	64.718513	24.09576	223.247134	24.3313826	34.999607	38.896297	20.113396	26.194315	34.399311	55.542023	6.6428194
ENSG00000166233.14	ARIH1	0.698998201923731	0.245754744991601	0.00445102666492352	0.0838208940818361	37.295109	51.5651	38.097162	19.085732	33.148666	23.6338782	12.1498545	31.980721353	29.65214423	26.2683048	24.617394	19.337941	16.438048
ENSG00000173890.16	GPR160	-1.81086430466284	0.636828352833799	0.00446115813292812	0.0839478007599288	1.5929543	0.723742	1.125958	17.692067	1.6070534	7.245473	27.833622	9.1400796	22.869855	51.895926	11.873297	37.291545	16.348077
ENSG00000141736.13	ERBB2	-2.07717625439786	0.730695461406926	0.00447277261957374	0.0841024000542191	22.0123465	14.8677066	21.380879139445	41.2381763	8.8842024	70.1568143	168.8282036	15.6419117	1159.926154	39.9326177	26.522153	64.447995	29.1022256
ENSG00000221968.8	FADS3	1.80761895041109	0.635970069437049	0.00447890533373869	0.0841537680207774	59.536203	183.588351	50.5086	9.615632	227.460961	6.32691	7.488357	53.885606	23.734173	19.401361	38.618458	9.50215	14.580078
ENSG00000101544.8	ADNP2	0.742042443698227	0.261152795055188	0.00449143762714193	0.0843252079541934	7.72297	16.396372	11.708232	5.58829	6.359305	6.030449	4.13157	6.76716	6.883894	6.31164	4.86784	7.12713	4.98015
ENSG00000258920.1	FOXN3-AS1	1.08154691025719	0.380794545599192	0.00450799714921711	0.084442404094313	4.69872	3.21428	4.53248	2.63756	5.35491	3.581	0.949354	4.52094	1.48686	1.34492	3.48771	0.979575	1.32919
ENSG00000162642.13	C1orf52	0.584738590374574	0.205893749433873	0.00451132989342016	0.084442404094313	23.81234	26.1965	27.67819	14.41926	33.72303	16.52931	11.35843	19.25421	17.5474	22.27304	17.88818	18.79921	14.338627
ENSG00000164902.13	PHAX	0.688676350984077	0.242475050677566	0.00450860082110411	0.084442404094313	19.912664	27.35763	23.42633769	9.910352	25.07123	21.077292	7.250987	17.150545	14.96025	12.7331	15.764008	20.2585870012465	13.33773
ENSG00000180957.17	PITPNB	0.921892679557944	0.324590479630546	0.00450892640117742	0.084442404094313	65.551909	120.918319	86.591832	25.303966	73.600194	39.8697589	26.92599	61.397163	42.495199	30.631108	43.384617	44.8622596	24.547079
ENSG00000146592.16	CREB5	1.93621988166942	0.681850107369246	0.00451621791541137	0.0844700017512127	8.5973381	36.4542579	5.8085819	1.878043	22.3067574	0.5831367	0.915865	8.133967	3.018181	3.3422465	3.871656	0.5188226	0.7514535
ENSG00000132297.11	HHLA1	-2.02373863997172	0.712823415794276	0.00452485990785834	0.0845677178398449	0.220839	0.0711456	0.246232	0.230211	0.0683862	0.536638	0.655333	0.19155	0.909168	0.147753	0.154475	1.47778	5.56742
ENSG00000081479.13	LRP2	-2.56512798310777	0.903870144778351	0.00454059146084883	0.0847976873197768	0	0	0	0.0109144	0	0	0.2224513777892	0.003201572222	0.0134101	0.00908327	0.038104030725	0.00986574	0.1194227023498
ENSG00000152234.15	ATP5F1A	0.72688890258067	0.256159705583033	0.00454484797812189	0.0848131698481344	267.832266	210.487769	350.623622	194.1947514	224.860724	323.670494	92.87363607959	269.060402003588	127.2094314	158.5801546226	242.662004	142.019852	171.813289
ENSG00000144579.7	CTDSP1	0.440912106010832	0.155405932889708	0.00455162370382069	0.0848756055395954	133.88677498915	72.839596	102.667507	105.170684	93.933833	82.955319931583	63.7772733	107.168641	91.013404	82.420219	82.880461	71.2521399989142	56.926804
ENSG00000267284.1	AC022031.2	-2.24019460384442	0.790003430423505	0.00457286596366588	0.0851692506139354	0	0	0.195682	0.127933	0.158408	0	0.16894	0.227517	0.765461	0.695913	0.171941	0.310988	2.417308
ENSG00000103995.13	CEP152	-0.948232802990864	0.3344052294745	0.00457425476120106	0.0851692506139354	0.929965	0.760224	0.850041	1.768207	1.657725	2.224057	2.634801	2.3309183	5.003373	2.569422	2.827763	2.622128	3.34164
ENSG00000272853.1	AC069544.1	-1.42347080868442	0.50208241417319	0.00458065006976285	0.0852007042832254	0.628947	0.912556	0.12758	1.03041	0.469912	0.746693	1.78628	0.558344	3.08361	3.55433	0.685686	2.27177	3.11835
ENSG00000279039.1	AC011447.6	-1.87076859797314	0.661005739036011	0.00465210802579498	0.0852007042832254	0.0628729	0	0.0424659	0.0981161	0.019666	0.0991388	0.297666	0.0825872	0.160802	0.436834	0.0761215	0.8314	0.0503705
ENSG00000181800.5	CELF2-AS1	-2.20065257463905	0.776889226338794	0.00461644018210882	0.0852007042832254	0.0664766	0	0	0.0172899	0	0.0174721	0	0.109155	0.212538	0.0769811	0.0402429	0.0837345	0.284025
ENSG00000182473.21	EXOC7	0.460524006920971	0.162672025389557	0.0046403164252623	0.0852007042832254	53.0025516	42.233471	50.0482804644	25.59761127467	32.480969588	35.9868586	27.790475	40.9770370008645	38.724898	28.551918	29.44264705703	28.544817	24.7669038009
ENSG00000175602.3	CCDC85B	1.20398567318845	0.425337458633557	0.00464520907820435	0.0852007042832254	48.3192	120.017	44.6665	19.5458	86.4908	28.6538	10.7514	56.0441	30.2077	30.0772	27.4065	21.2067	15.2237
ENSG00000173727.12	AP000769.1	0.892873476018457	0.31530315584979	0.00462877088324543	0.0852007042832254	6.872697	3.939872	9.46868	3.022787	9.1981	3.731949	2.510433	3.3184048	2.119599	4.118506	4.288175	3.8992634	3.597563
ENSG00000143171.12	RXRG	2.2257436429651	0.786014393133913	0.00463037199371628	0.0852007042832254	3.554053	3.9779	5.283525	0.8855136	9.460833	0.8619	0.1533228	2.951184	0.157144	0.11856	0.906875	0	0.0218638
ENSG00000188710.2	QRFP	1.37677009042386	0.486595063604495	0.00466359653326041	0.0852007042832254	1.37875	1.36597	1.449786	0.107574	1.48556	0.3813535	0.1871662	0.611476	0.6862443	0.299459	0.344345	0.587217	0.220786
ENSG00000152413.14	HOMER1	1.44536163647681	0.510545559405151	0.00464006871107959	0.0852007042832254	4.203149	23.19296	2.878282	1.7463	5.452371	3.048246	1.558357	2.691749	3.72488	2.897335	3.542782	1.959226	1.541669
ENSG00000071655.17	MBD3	0.520428146755429	0.183811988986151	0.00463582207802187	0.0852007042832254	53.379957	55.41359	47.519172	44.606863	71.47069	41.236647	23.552007	54.282999	44.707443	39.984967	34.316963	42.328909	43.897033
ENSG00000116251.10	RPL22	0.53140197509976	0.187536574090669	0.00460281803362324	0.0852007042832254	542.40488	709.566915	558.832909	390.8880743	427.709331	597.7006623	245.52836	566.881827	399.84686	438.77415	428.0753037	523.12566	299.16685
ENSG00000270804.1	AC010326.4	-1.48813658003971	0.525701214383697	0.00464368306117462	0.0852007042832254	9.96445	3.047739	3.82779	19.16696	7.58295	10.37019	46.043	10.29479	22.60637	53.4461	7.588413	27.1596	42.6223
ENSG00000179094.15	PER1	1.43210236035402	0.506137459450223	0.00466247095850878	0.0852007042832254	146.311948	65.5968383	299.740341	68.1177889	29.3987317	66.2481372	19.241811	101.432327	35.0350035	49.735552	49.670581	25.614193	9.7911716
ENSG00000099817.11	POLR2E	0.686386897622092	0.242602318245984	0.00466546592458155	0.0852007042832254	201.945565	173.22934	179.007812	83.826454	218.940865	140.688769	56.5629415	132.0709041	105.302031	137.508643	154.335299	128.3854172	78.070285
ENSG00000229036.7	VDAC1P8	-0.764173511553915	0.269844797696641	0.0046272301924505	0.0852007042832254	6.243668	5.182763	7.203062	9.8055391	3.0021633	3.756305	10.143282	12.625903	13.822742	9.323138	10.482458	11.540169	9.901943
ENSG00000146834.13	MEPCE	0.518402201434175	0.183084417830254	0.00463312841454886	0.0852007042832254	31.4837	27.787562	28.2007	16.53515	35.712075	26.1909	15.15924	25.23455	23.935721	27.10547	22.641801	19.53921	14.79846
ENSG00000134259.3	NGF	2.34654806620159	0.829346219888537	0.00466360970109709	0.0852007042832254	5.33977	5.27937	1.74492	0.277723	28.1045	0.328603	0	2.8088	0.969434	1.08315	0.916304	0	0.237267
ENSG00000261096.1	AC073476.3	-1.56413341719106	0.552034091822469	0.00460557098167915	0.0852007042832254	0.0653529	0.14489	0.0662128	0.0509929	0	0.0343524	0.118416	0.343387	0.0479092	0.217052	0.356062	0.164629	0.19197
ENSG00000134597.15	RBMX2	-0.336747523806856	0.118906521001311	0.00462526704751796	0.0852007042832254	26.444195	20.834424	25.0782942	22.115185	18.912434	15.960714	22.963924	27.873705	35.964649	31.325881	25.830234	37.601756	27.605253
ENSG00000206549.13	PRSS50	2.33137699601845	0.823123945536466	0.00462069085323382	0.0852007042832254	0.447515	0.868208	0.316974	0	0.154285	0.0353543	0	0.114416	0.0555844	0.0274717	0.0574618	0	0
ENSG00000143178.12	TBX19	-0.807141603473114	0.285079839259874	0.00463617309113694	0.0852007042832254	3.29017	1.027527973	2.25287204549	2.06954	0.946236	2.150468	3.173969	4.118389	3.575759	3.107404	2.4907946	5.343861	4.311303
ENSG00000277840.1	AC026368.1	-2.01915582207348	0.713470571493051	0.00465410500666687	0.0852007042832254	0.205042	0.0992402	0.416339	1.35927	0	0.407149	3.23411	0.506201	2.46903	4.3714	1.30464	7.25142	0.163674
ENSG00000273032.2	DGCR9	-2.105395061451	0.743636000603208	0.00463712148135962	0.0852007042832254	0.2453863	0.165328	0.124993	0.178979	0.2348577	0.1728688	0.348858	0.0702353	0.0675768	1.0744195	0.0587823	7.4026	0.694524
ENSG00000272599.2	AC016394.1	-1.23368624667978	0.435232173309798	0.00458906424924452	0.0852007042832254	2.81349	1.627107	2.45703	2.928084	3.77579	4.267061	4.182275	2.984166	8.30952	8.67004	3.256471	13.15698	16.76965
ENSG00000101412.12	E2F1	-1.50520408273724	0.531268836453489	0.00460809562713621	0.0852007042832254	2.4659	1.41274	2.29937	10.6079	1.55611	6.38345	8.52343	4.3643	16.9327	16.5836	8.02531	30.4063	21.1883
ENSG00000185955.4	C7orf61	-1.44595371592516	0.510335972282872	0.00460648158708193	0.0852007042832254	0.83946	0.3039376	0.430574	0.24381	0.992397	0.296809	0.850405	1.079857	0.735201	0.831418	1.25859	4.92749	2.110694
ENSG00000261168.1	AL592424.1	1.65193436813031	0.584248443175585	0.00469200642339768	0.0855591001820012	0.677089	0.363614	0.571899	0.0880466	0.63416	0.0891074	0.0593587	0.29661	0.180554	0.032683	0.204983	0.0712379	0.0301141
ENSG00000269001.2	AC092070.2	-1.37479754575177	0.48619986876577	0.00468927026616322	0.0855591001820012	2.114402	0.267852	1.655907	0.728737	1.818251	0.922	7.79106	1.811584	2.687463	2.99111	1.483727	4.615036	2.955672
ENSG00000085433.15	WDR47	0.855570008517296	0.302742464099836	0.00471236389984085	0.0858400335210549	7.9178725	5.16676733783	7.8275530107878	2.3731989312322	4.645619315823	10.988716	2.75729900074622	5.5080548	3.586723	3.436457712	4.51857868864	4.4377284	2.7790799
ENSG00000166111.9	SVOP	1.98803250787995	0.703496627696	0.00471435059830728	0.0858400335210549	0.326792	0.1225979	0.246304	0.188987	0.0214267	0.0481876	0.0998073	0.0388117	0.014567	0.0131976	0.0276028	0	0.00609212
ENSG00000267002.3	AC060780.1	-1.19571521953185	0.423311018857522	0.00473288856549697	0.0861102190248827	10.204351	3.444549	8.084146	5.591346	1.7692599	4.039064	22.57481	7.384838	7.767476	20.2926184	7.6970346	16.542854	11.959521
ENSG00000155592.15	ZKSCAN2	0.973735102214387	0.344751825385401	0.00473614904396303	0.0861102190248827	1.648923	2.119751	1.75156	0.8051892	0.8404445	0.6870737	0.31411	1.31113	0.8724625	0.566034	0.9647028	0.4958171	0.4935492
ENSG00000180884.9	ZNF792	-1.0455335400677	0.370227720067692	0.0047424204811243	0.0861609359804852	1.5535	0.263289	0.952448	1.32902	0.504145	0.848606	2.6032714	1.669677	2.994713	1.9631268	1.389892	2.723378	1.2628862
ENSG00000225548.6	LINC01980	-2.61240896728107	0.925172431352085	0.00474728653474143	0.086186064051487	0	0	0.174134	0	0.0290947	0	0	0	4.969117	0.0808972	0.0563802	0.029364	6.756331
ENSG00000048052.21	HDAC9	1.23276853248694	0.43691096673911	0.00477913702158446	0.086356007403745	14.1642473	4.2534695	11.628763	9.9571868	2.4127927	2.463713	2.3469019	3.6786393	2.24194564098	3.894833582445	5.797943228406	1.6735844	2.4624625
ENSG00000138115.13	CYP2C8	-1.30900072936131	0.464180808940282	0.00480201520256832	0.086356007403745	0.5343	0.3509278	0.2985789	0.4997858448	0.47131350148674	0.421653	2.1097866	0.603093	0.550311	2.6886610902	0.68895	1.384564	0.523869582
ENSG00000163009.9	C2orf48	-1.98547277446483	0.70352258381785	0.00476972537454796	0.086356007403745	0.110159	0	0.3643833	0.795699	0.0555239	0.5376336	0.841208	0.0972808	2.023489	1.45705	3.775111	3.054877	2.054006
ENSG00000272995.1	AC097505.1	1.90851433275325	0.676252754796199	0.0047696784387325	0.086356007403745	0.550356	0.932972	0.699062	0.429154	0.382247	0.109631	0	0	0.265582	0	0.250253	0.132165	0.21932
ENSG00000267838.2	AC245884.8	-1.49731280373382	0.530892454242169	0.00479684029462817	0.086356007403745	2.58612	0.214455	0.899543	1.09512	0.206764	1.81462	4.37133	1.45811	4.83285	3.46976	1.61137	3.5168	6.0829
ENSG00000175063.16	UBE2C	-2.0542578410743	0.728023903788815	0.00477713155129	0.086356007403745	3.1098895	0.176076	1.41169	29.574625	2.374703	43.928187	52.926298	25.568367	86.68902	104.743731	78.24214	165.616892	136.015479
ENSG00000213760.10	ATP6V1G2	1.427413846541	0.505803774620309	0.00477147058221005	0.086356007403745	5.677968	2.179558	5.8614	0.771009	1.322174	0.71125	0.221297	1.237847	0.944387	0.811503	1.610782	0.701363	1.283171
ENSG00000205771.6	CATSPER2P1	0.68135340096128	0.241602178809506	0.00480018146432221	0.086356007403745	2.640662	1.391132	1.5626943	1.5929878	1.847939	1.0795362	0.986378	0.9219672	1.593475	1.346673	1.3575506	0.983786	0.7393063
ENSG00000273151.1	AC073957.3	-1.2667273379539	0.448874821598315	0.00477243181439253	0.086356007403745	2.23297	1.10335	2.36159	1.24945	0.611717	1.91214	3.5798	1.79363	3.11089	3.44366	1.62867	12.8077	4.39282
ENSG00000174844.14	DNAH12	-1.88895959911067	0.669701322203799	0.00479339198539359	0.086356007403745	0.16765752	0.1404337	0.1472944	0.3938167	0.068851	0.0858602	1.9558806	0.41754386	1.1237855	0.04250304	0.1964059	0.4319158	1.2318833
ENSG00000187398.11	LUZP2	1.82831239755632	0.648126643633436	0.00478863766338033	0.086356007403745	0.3929383903	0.03046229433	0.4464348897	0.0820244578	0.1249631674	0.3184126	0.0580647606	0.2041393338	0.0503798446	0.0365077834	0.05726384225	0.0141446	0
ENSG00000116005.11	PCYOX1	0.946778011885015	0.335578744774426	0.00478251414855137	0.086356007403745	37.125076	19.78628	28.493114	9.221363	41.298424	22.895624	10.947646	19.280946	17.342558	13.7021506	20.174924	15.920209	5.385818
ENSG00000231226.1	TRIM31-AS1	-2.0406721535219	0.723599131084001	0.00479982981557959	0.086356007403745	0	0.139396	0	0.224385	0	0.229424	0.343433	0	0.846736	0.889792	0.441642	1.55816	0.829583
ENSG00000173812.10	EIF1	0.881808665113454	0.31280165057217	0.00481635335395515	0.0865509540621789	1119.32864	1890.6161	1238.19472	537.31246	1942.2933	754.02777	605.90127	1028.95116	717.23646	789.4337	897.077875	610.561	462.14889
ENSG00000213185.6	FAM24B	-0.916673211644392	0.325436168443685	0.00485118606820545	0.0870969361900985	3.589491	1.937081	2.643703	3.958731	0.904062	2.469392	3.634321	5.07068	8.27048	4.91956	3.542589	9.36946	4.536521
ENSG00000105366.15	SIGLEC8	-2.16409633037092	0.76840503471138	0.00485729528964784	0.0870969361900985	0.164536	0.123642	0	0.7296306	0.102962	0.4363498	0.173109	0.396203	0.262969	2.34971	0.415001	3.7331495	7.0548038
ENSG00000284543.1	LINC01226	-2.11729782065947	0.751769846825851	0.00485624998530077	0.0870969361900985	0.0460381	0.010074	0	0.1688474	0.14110293	0.0280518	0.0445581	0.5295749	1.743833	0.24669663	0.0512685	0.141632	0.397193
ENSG00000233783.7	AP001442.1	2.15790463308273	0.766385383668403	0.0048672414726408	0.0872120856194761	0.183012	0.3521899	0.0741965	0.384123	0.759847	0	0.1109384	0.0360761	0.0702713	0	0	0.0346539	0.0586079
ENSG00000104756.15	KCTD9	0.691004781341101	0.245475787502326	0.00487831455766805	0.0873472458245267	18.825255	27.69527	20.531014	11.268116	19.150031	21.015570125	11.941794	16.5041405	10.330206	10.2263948	14.9338044	20.094328	9.272838
ENSG00000183773.15	AIFM3	-1.35029428838827	0.479815045014997	0.00488991792778755	0.0874916985705734	1.202558721718	0.723032669333	0.7781359	1.62372408485	1.1985643	1.64294070399098	3.707948	1.3313632	11.706049	2.36445749723	1.52010096	1.940479014039	3.29654927108
ENSG00000130818.11	ZNF426	1.02807008964419	0.36535383800118	0.00489440659344008	0.0875087363834355	4.677983	7.22164	6.601713	2.330778	3.565265	4.002613	2.168172	4.393251	2.9300816	2.5833603	2.995124	0.887171	1.2146866
ENSG00000094804.10	CDC6	-1.86920100180679	0.664665257550824	0.00491971402917979	0.0875185648109661	0.9335758	0.3889913	0.5326231	4.839355	0.80864	7.095127	25.060949	2.304108	9.627567	9.150091	3.531014	24.454035	12.886536
ENSG00000034152.18	MAP2K3	1.50536682185077	0.5352720264823	0.00491825165163923	0.0875185648109661	49.7681060006518	348.14748583	31.925889	40.060812	180.819661001641	39.9247196348	50.241057	28.716624507	49.924231	62.195135	27.99027	38.721067	25.9349624
ENSG00000153446.15	C16orf89	2.03359148861333	0.722983274881582	0.00491155390571329	0.0875185648109661	26.075955	41.971264	23.286839	84.09856	84.60895	18.939047	10.015188	46.170614	3.207219	2.427563	4.035707	0.2545012	0.848476
ENSG00000178878.12	APOLD1	1.73375199894222	0.616431992828365	0.00491488449215222	0.0875185648109661	32.170556	11.9691467001178	11.1977000002609	5.842738	116.105479	4.49659000011914	5.7427	19.2241440317324	10.797689	11.188379	6.046756	4.427199	3.41381303133
ENSG00000086544.2	ITPKC	1.2780009819086	0.454359276240128	0.00491191758758281	0.0875185648109661	11.3295	42.25477	62.08811	10.4778	28.661632	72.53677	17.733862	22.460005	13.148461	19.275269	7.09199	22.011	12.5558
ENSG00000261089.1	CDC37P2	-2.0997701962151	0.746463394408666	0.00490880583784018	0.0875185648109661	0.121238	0	0.122956	0	0	0.239841	0.526063	0.119579	0.34134	0.737803	0.0883123	1.81674	0.242404
ENSG00000163918.10	RFC4	-0.800815763841309	0.284638358376059	0.00490130215074615	0.0875185648109661	11.834168	7.836235	11.819379	13.673424	6.10006715885	14.749503	14.727987	15.377519876128	17.208867	20.073807	22.722073	27.77104	30.804917
ENSG00000100380.13	ST13	0.845513699347819	0.300687405450876	0.00492443212695624	0.0875395639235145	165.629435	170.891629	192.413815	57.18072	136.19952782	88.629828	46.581956	137.912772	75.55767267	58.79069018	94.14385	109.060326	47.946299
ENSG00000197780.9	TAF13	1.11182946589315	0.395521177811282	0.00493802438564436	0.0877181718756423	43.2701	108.1457	45.2415	14.81063	101.1675	37.927	24.21491	33.685	25.6886	24.94023	38.0312	36.4306	18.53593
ENSG00000152582.13	SPEF2	-1.00865004620681	0.358869058454792	0.00494437943427808	0.0877210980400316	2.9237243	1.0625338	1.366945804	1.5197264	0.4870112	1.0307934	2.5374343	1.62018833	2.8446456	3.12555332	2.6817735	6.1495372	2.6486427
ENSG00000141748.12	ARL5C	2.11653546633631	0.753119588777957	0.00494864604914101	0.0877210980400316	0.703457	0.118056	0.2476785	0.1683327	0.1645433	0.0358308	0	0.146414932	0.0653776	0	0.1674885	0.0214654	0
ENSG00000272196.2	HIST2H2AA4	-1.32936389707637	0.473024965872518	0.00494882412058533	0.0877210980400316	16.7573	6.48944	13.5749	10.4608	12.6077	2.63719	21.1562	9.89893	16.0533	61.1014	18.2532	69.4416	18.8113
ENSG00000231826.5	LINC01819	-2.22074138070473	0.790294366197549	0.00495387319534003	0.087740697077035	0.102773	0.0744858	0.249776	0.0200474	0.0722904	0.2481402	1.169515	0.1352544	5.857781	0.1491774	0.264083	0.1303221	0.0205798
ENSG00000129473.9	BCL2L2	1.15113633336504	0.409684247516857	0.00495702139881572	0.087740697077035	69.360294	50.293476	80.413934	19.563228	34.488809	27.602176	8.658163	40.969657	17.082338	13.480428	40.841383	23.856637	9.062242
ENSG00000180720.7	CHRM4	2.0732951015885	0.738173164298343	0.00497444583721274	0.0878605726208632	1.18833	0.148222	1.12677	0.239267	0.0359	0.121083	0.181471	0.075568	0.0736015	0	0.139263	0.0726042	0
ENSG00000159423.16	ALDH4A1	1.19138490331358	0.424129138340248	0.00496934069685381	0.0878605726208632	5.704181437	10.2751949	8.946351	5.26208	28.2819697	25.390833	5.1546412	6.5902	5.734412	6.5756114	8.543939	9.6673732	4.23114
ENSG00000152661.8	GJA1	1.73923160419702	0.619218867010264	0.00497340984099556	0.0878605726208632	59.067250510914	208.98190125728	147.214672242296	7.45749157304	207.820150935922	54.96231400896	17.2507880199922	58.17334154563	36.3945072	31.92754808943	67.742831272403	10.4261400147494	3.3159500645634
ENSG00000168702.17	LRP1B	2.38728751547149	0.850083620125575	0.00498042283373822	0.0878883379468262	0.890983	2.303621	0.5922813	0.06133245	0.10515978	0.08775004	0.00242792	0.2328299	0.0029479	0.136871	0.1248958	0	0
ENSG00000089169.14	RPH3A	2.14882637456353	0.76563892936173	0.00500705857784986	0.0878883379468262	0.14272277	0.0114178	0.1184728	0.1064161	0.3925457	0.0368834	0	0.0442042	0.0793126	0.02052560525792	0	0.0220969	0
ENSG00000245750.8	DRAIC	-1.66805630491649	0.594390524664619	0.00501092554177637	0.0878883379468262	0.5448428	0.0385825	0.2237667	0.533202	0.3388959	0.6776402	1.6238158	0.4015599	4.0874378	1.5763737	0.603753	0.6064493	2.2516225
ENSG00000165804.15	ZNF219	1.00530708921951	0.358245941040225	0.00501307270786218	0.0878883379468262	40.529054	40.6117554	51.433171	13.434535	33.3397881	32.4482212495	13.4756493	35.4273116	25.005434	8.2946783	25.0763647	13.8393843	9.8338166
ENSG00000173548.8	SNX33	0.691156667893345	0.24627290324903	0.00500881108069696	0.0878883379468262	22.5118	11.66456	14.17892	16.42578	21.25322	16.9479	7.64292	13.35603	16.9638	15.8326	12.88191	6.80769	8.24627
ENSG00000226647.2	AL365356.1	-1.63953124406379	0.584074501407175	0.00499961745569833	0.0878883379468262	0.202336	0.195725	0.0684137	0.0526132	0.188871	0.0534003	0.7123695	0.0925335	0.6090613	0.39766	0.354213	0.19243	0.428177
ENSG00000089250.18	NOS1	2.43354136191606	0.867314505719301	0.00501863897833362	0.0878883379468262	0.61361790606	0.081183	0.94488449944	0	0.055318722736	0.221666	0	0.12829273729	0.0040271736266	0.020477493072	0.041971339165	0	0.0033695769988
ENSG00000071246.10	VASH1	-0.82990256568619	0.29569560332717	0.00500656429470599	0.0878883379468262	11.663359	3.468914	5.031245	4.544288	6.168563	5.832376	5.914552	13.757291	17.815478	14.849659	6.819509	19.100488	7.678083
ENSG00000156381.8	ANKRD9	0.478120064818337	0.170387907737278	0.00501500993330106	0.0878883379468262	14.286396	15.23822	17.32989	20.53374	15.166992	15.96556	12.114299	14.55216	14.59505	15.172705	10.38853	14.92362	9.839256
ENSG00000214872.8	SMTNL1	-1.69184624721793	0.602943435602281	0.00501640573304686	0.0878883379468262	0.658972	0.167617	0.175754	0.460029	0.35744	0.301167	0.356152	0.717824	0.632498	0.994358	0.283488	6.66385	1.33293
ENSG00000277702.1	AC239859.6	2.29036361649546	0.816258975124794	0.0050171958280741	0.0878883379468262	2.64442	5.0701	1.27234	8.42274	2.08294	0.969951	0	1.16735	0	0	2.11039	0	0
ENSG00000230177.1	AL080317.1	-1.26392885437581	0.450353132128592	0.00500784981939363	0.0878883379468262	1.96932	0.545082	1.4295	3.29058	0.520887	1.12114	4.76932	3.33751	7.06078	5.39085	1.91897	2.43321	4.48391
ENSG00000100461.17	RBM23	0.427657340270487	0.152442763640099	0.00502598893332187	0.0879548063331327	46.890939	53.442981854	53.3446	36.856728	30.8375674	38.995384	28.254204	45.270499	37.524035	34.935596	31.353926	44.612232	26.3826250011232
ENSG00000181061.13	HIGD1A	0.76883871967132	0.274185783636023	0.00504604699658929	0.0881810967024025	149.483024	190.790559	169.250158	121.043285	117.81045	156.419985	66.220703	143.15028	72.668643	73.781593	113.614897	169.589695	46.828003
ENSG00000076053.10	RBM7	0.883445361285224	0.315051477327778	0.00504525271080877	0.0881810967024025	21.976813	40.23414614879	19.8550300022351	7.3396542775	26.218505	15.893153	7.853551	17.187328	13.053458	14.830574	10.943523	16.864819	10.161408
ENSG00000224067.2	AL354877.1	-1.82508346724026	0.65094592646725	0.00505135408047861	0.088209418993627	0.933898	0.226631	0	0.728718	0.42918	0.187599	2.21244	0.925836	1.35919	0.815463	0.851195	1.13293	5.57448
ENSG00000280623.1	PCAT14	-1.71222709829962	0.610741714012047	0.00505479717651902	0.088209418993627	0.0807342	0.0259975	0.1338262	0.0629966	0.0126372	0.0636073	0.127414	0.260278	0.128999	0.2623638	0.0488688	1.012464	0.0970518
ENSG00000113369.8	ARRDC3	0.991083659650618	0.353720408853263	0.00508050908445648	0.0885956288195036	43.616471	54.312394	23.416535	9.842153	43.818752	17.468252	11.492588	16.443654	17.308448	25.478736	20.970226	17.734856	10.765151
ENSG00000173621.8	LRFN4	-1.05695825998375	0.377421451116034	0.00510279115102031	0.0889215260788715	6.109789	3.530244	6.201634	9.839262	13.54438	4.690676	17.82861	9.30601	20.823921	21.111418	16.589997	29.71411	8.336831
ENSG00000197903.7	HIST1H2BK	-1.44292807777901	0.515347976297235	0.00511168176657622	0.0889511711068414	23.0726	13.3562	14.1103	20.3452	23.8383	42.3586	63.8186	24.482	63.5704	113.667	17.8359	236.923	30.053
ENSG00000140459.17	CYP11A1	1.8974297061915	0.677634355185635	0.0051090106586431	0.0889511711068414	1.36738553	0.70137951	0.3466505	0.4935616	1.591846	6.536422	0.176142	1.57186377	0.801785	0.1285355	0.329426	0.0621231	0.162478
ENSG00000241015.2	TPM3P9	-1.35999225994799	0.485841922411795	0.0051221705204411	0.0890710537795608	4.41245	1.767096	2.13388	2.67772	4.71143	5.32327	23.56879	3.06321	11.0566854	9.37247	5.5113017	5.16993	10.91167
ENSG00000278916.1	CEP83-DT	-1.39558512739341	0.498904671915675	0.00515319516325914	0.0895476224121119	0.198206	0.0212798	0.200816	0.120287	0.0206631	0.0520942	0.173775	0.564121	0.190109	0.306034	0.179982	0.249657	0.476355
ENSG00000280208.1	GGT4P	-1.92917004000693	0.689861830288505	0.00516660317326376	0.0896575022973938	0.0333259	0	0	0.0782069	0.0312281	0	0.196578	0.0328435	0.1281	0.232233	0.092185	0.157681	0.109648
ENSG00000048707.15	VPS13D	0.691068228519748	0.247123533886448	0.00516676493336365	0.0896575022973938	31.824043896828	37.7750190197788	31.1534051	16.48127973358	20.1156609	25.000569	11.7342135	28.9018540124214	14.019511	15.6215297	21.4222561	24.5080085	12.06144404652
ENSG00000137766.17	UNC13C	2.35467606254271	0.842107262186626	0.005171200159424	0.089671582301995	0.3066663	0.575781	1.382913	0.0531165	0.12709969	0.00877712	0	0.1676248	0.00534167	0.0193571	0.1237317	0.00525295	0
ENSG00000268516.2	AC020915.3	-1.03744046579348	0.371082688476598	0.00517854644250326	0.0897304792901882	2.95274	2.33347	2.35388	1.44172	1.13122	1.26467	7.30722	3.13952	2.55589	4.26545	2.31642	6.87463	2.80758
ENSG00000256628.3	ZBTB11-AS1	0.698460884882027	0.249851299897619	0.00518184905660452	0.0897304792901882	1.58819	0.761496	1.02338	0.945053	1.91349	1.39661	0.498032	1.17224	0.771828	0.94833	0.886344	1.00295	0.759843
ENSG00000282951.1	AC008537.4	-1.27145382530776	0.455004062308215	0.00519994863056903	0.0899809292751263	2.21188	0.395209	0.898533	3.09856	1.37796	2.35491	6.85297	2.36686	3.48609	4.30595	3.3186	7.21123	5.75096
ENSG00000162572.20	SCNN1D	0.99775389132004	0.357258281176959	0.0052252648722367	0.0900947182010592	4.927097	4.778148	7.408101	3.680561	3.27631100366655	1.889664	1.4958612	5.110143	1.2291019	1.846117	2.334805	1.706238	2.211213
ENSG00000261687.1	AC068724.1	-1.90087022833618	0.680534721895621	0.00521892607734363	0.0900947182010592	0.526893	0	0.181273	0.134089	0.155691	0	0.924377	0.342234	0.681051	0.61047	0.768454	0.161452	1.19757
ENSG00000135205.14	CCDC146	1.57055986602583	0.562186341795563	0.00521145612301539	0.0900947182010592	67.848548	19.092164	55.566299	4.383853	4.177594	12.118639	6.368697	10.0692414	6.07829	7.319375	17.760816	2.984486	5.641913
ENSG00000197381.15	ADARB1	1.55210895689715	0.555656046242118	0.00521747545292645	0.0900947182010592	52.88806122647	51.7771960030165	46.774092	4.419723	11.249517	3.8228143	4.1247259	15.773987	8.6614962170095	9.4352929	16.4538627	4.9181238	4.4004061
ENSG00000156920.10	ADGRG4	2.24458072234176	0.803680153095967	0.00522413699622379	0.0900947182010592	0.063031435519	0.05045798714051	0.0580298	0	0.0161584	0.0135336	0.723465035795	0.011285	0.00549092	0	0	0	0
ENSG00000168925.11	CTRB1	2.40456302833459	0.86104317023404	0.0052283699873397	0.0900947182010592	0.140114	0.0451577	0.331448	0.437265	0.733932	4.268422	0.0368489	0	0.0448584	0.644828	0	0.0442858	0
ENSG00000282890.1	AC009975.1	2.31419428591148	0.829527856761115	0.00527450338451927	0.0906985572331648	0.442611	0.155511	0.448416	0	0.0566416	0.0158605	0	0.0594594	0.0192948	0	0.0548052	0.0190004	0
ENSG00000220848.5	RPS18P9	0.672819294607851	0.24119212047722	0.00527801193057816	0.0906985572331648	6.76623	7.12891	5.67586	6.374485	5.953981	3.349197	2.431773	4.54735	3.943099	5.016234	5.553951	4.87359	2.384169
ENSG00000176845.12	METRNL	1.27585869100235	0.457371486924409	0.00527820373623591	0.0906985572331648	55.641861	102.73249	30.481593	30.156724	231.43416	64.72993	33.793927	23.848124	49.763249	44.881719	23.667928	59.22094	29.003073
ENSG00000257767.2	AC002996.1	2.56252743306637	0.918689571836146	0.00528173857235767	0.0906985572331648	6.5903	13.9543	24.7098	0	6.17157	2.15116	0.882271	1.56182	0	0	0	1.55437e-07	0
ENSG00000274373.1	AC148476.1	-2.00941451316593	0.720329026295164	0.00527766669131471	0.0906985572331648	0.0994779	0	0	0.155171	0.0925203	0.0789911	0.941455	0.0982264	0.862331	0.259674	0.180838	0.665295	0.158837
ENSG00000187416.11	LHFPL3	-2.29372956801939	0.822498875780107	0.00529147068681	0.0908026644556959	0	0.0588019	0.0924848	0.284831	0.0570311	0	0.912124	0.1261647	0.058384	3.4619	0.0276268	0.316523	0.755213
ENSG00000138593.8	SECISBP2L	0.661143095670729	0.237141735330761	0.00530401098321485	0.0909547829380814	13.035911	9.72648	12.256207	7.7932392	6.9611016	7.205758	4.219896	10.1657291	7.2920315	6.464839	8.346706	3.9162409	4.926445
ENSG00000102030.15	NAA10	-0.459817007155068	0.164960558228761	0.00531269385482031	0.0910405882531361	91.093816	89.560821	87.783935	69.288805	87.974046	81.3292109	94.357686	117.874012	129.455782	115.005382310383	99.9298990272213	182.844968	155.778706
ENSG00000171444.17	MCC	1.32739479916738	0.476404717639015	0.00533175336104697	0.0913039701862334	8.9308892	5.5543265	9.6306469	3.2869558	12.602039	7.3007648	0.8672524	8.4600012	2.784104	3.6286966	5.0075191	1.0686129	1.2451973
ENSG00000280129.1	AL132780.5	-1.63073918411116	0.585513072429659	0.00535036846158563	0.0914961075203431	0.0877448	0.0340885	0.142973	0.247646	0.0330396	0.361938	0.278261	0.104275	0.643171	0.888559	0.320293	0.901332	1.15769
ENSG00000260838.3	AC022893.2	1.75741300572114	0.630956176980253	0.00534754050851003	0.0914961075203431	0.162328	0.141144	0.164441	0.113996	0.106684	0.0895473	0.102472	0.0159898	0.0311293	0	0.0589568	0	0.0130076
ENSG00000183336.8	BOLA2	-0.867426336614267	0.311526435009093	0.00536204157579383	0.0915718600331561	6.5552	7.09334	6.73877	11.71609	8.56316	9.20259	17.72694	8.94074	13.74307	28.17621	13.16986	23.47799	14.70087
ENSG00000182831.11	C16orf72	0.494085489941507	0.177460127722332	0.00536590006256118	0.0915718600331561	14.41699	15.7035	13.09158	7.86341	16.95526	11.6181	8.39678	10.53913	12.27224	12.60022	10.198	10.24751	7.94972
ENSG00000211750.2	TRBV24-1	-2.12717218811583	0.764011347186163	0.00536573808624091	0.0915718600331561	0	0.263993	0	0.212094	0.249432	0.218913	0	2.15682	0.528332	0.474909	1.23956	1.05723	2.16405
ENSG00000028528.14	SNX1	0.652312793597795	0.234385574709527	0.00538462437490549	0.0918280704045737	52.362912	90.2720544	51.3334459	31.077912	63.3300761	50.873648	25.528131	52.583467	46.814728	42.489820263	40.1065992	34.3659568	35.710047
ENSG00000029639.10	TFB1M	-0.982391070753813	0.353230862005392	0.00541652580925452	0.0920532698510139	6.013784	3.794498	7.309811	9.167376	3.181473	9.582478	12.20884	8.109104	18.143376	11.010173	11.106709	28.987805	14.20507
ENSG00000165553.4	NGB	2.55346241924804	0.918021666142884	0.00541110263521393	0.0920532698510139	3.19321	0.31726	2.41936	0	0	0.0235478	0	0.0588161	0	0.103697	0.108407	0	0
ENSG00000007952.17	NOX1	-1.77444712014988	0.637927061754322	0.00540944833696729	0.0920532698510139	0.0906335	0.0656824	0.0459141	0.106078	0.0850312	0.241867	0.858185	0.100216	35.6567	0.0883425	0.0823006	1.099825	0.7465349
ENSG00000275632.1	AL035461.2	-1.23076373186711	0.442524882264728	0.00541532601805148	0.0920532698510139	3.4088	1.35135	3.30786	5.31566	0.859366	3.33868	5.98613	4.44408	8.38108	8.50546	3.80552	8.80026	15.6711
ENSG00000146007.10	ZMAT2	0.509943741553511	0.183370897591102	0.00542015009791583	0.0920532698510139	71.11792	72.52434	70.60734	42.73851	73.666031	56.34439	32.58584	60.90946	50.24115	41.78507	55.71749	74.34791	34.97698
ENSG00000234511.9	C5orf58	-1.51425760664045	0.54447605505789	0.00541703726458228	0.0920532698510139	0.933318	0.3808897	0.6949028	0.7014905	0.5183456	0.555078	0.316556	0.8157633	5.239368	2.36329	0.5528135	1.76049	4.492324
ENSG00000097007.17	ABL1	1.2551641646222	0.451456540289462	0.00543162795948251	0.0921355218743145	71.66216	88.66812	97.2128	14.894666	59.261717	14.05326	14.524439	49.131698	25.892015	18.691365	34.879823	17.311033	12.281495
ENSG00000234753.5	FOXP4-AS1	-1.93051223666133	0.694377369775832	0.00543243994401394	0.0921355218743145	0.71313	0.236121	0.247882	4.16957	0.670322	0.36526	6.61406	0.241167	10.40503	7.054991	5.686651	9.07926	2.232428
ENSG00000185085.2	INTS5	0.579919360808011	0.208638434342631	0.00544355576086026	0.0922608132208815	8.29197	12.5437	8.79596	6.7752	11.1193	8.84549	5.33471	8.39252	7.6539	6.18205	7.61776	9.64098	4.13809
ENSG00000198088.10	NUP62CL	-2.13895301801395	0.769757050162157	0.00545705526642811	0.0924263056589757	0.0764334	0.3156535	0.395855604995	0.94555	0.09573248	1.401739	2.412695	0.113007	1.789272	0.436206	0.647463	21.97652	4.169162
ENSG00000232098.3	AC012313.1	-1.07570372556381	0.387208002232356	0.00546772774351982	0.0925437229913803	5.717057	1.933275	3.29558600923508	3.890295	2.819957	5.45248	10.698894	5.92421	5.140311	7.70915	4.110619	13.27228	15.12939
ENSG00000248576.1	AC023794.1	1.88845498072253	0.679862086330435	0.0054744625974475	0.0925917936897837	0.488619	1.42331	0.498073	0.381338	1.12233	0.589453	0.193005	0.48458	0.474428	0.426788	0	0	0
ENSG00000228252.9	COL6A4P2	-1.55071145758848	0.558313954052742	0.00547805156443093	0.0925917936897837	0.282119	1.313375	0.3054362	0.523978	1.263472	0.588298	0.964422	1.1454061	1.95784	1.735717	1.493273	2.067624	8.107193
ENSG00000107104.18	KANK1	1.25354081308375	0.451389442832918	0.00548510904025855	0.0926477974069609	44.197775	39.143289	36.241961	11.591919	79.210956	35.899635	8.6919397205	27.125292	21.669799	9.760666	38.847553	14.823639	5.79594
ENSG00000152422.15	XRCC4	-0.547786890453787	0.197299311866716	0.00549601863301991	0.0927687456166969	4.847006	3.98246	3.763931	3.4325219	3.47898	5.928774	5.392983	5.658858	7.4471212	9.671973	6.41079	8.307274	5.261983
ENSG00000149548.14	CCDC15	-1.0065639006793	0.362729711966835	0.00552068787619291	0.0930753827078216	0.4469456633	0.349854	0.733747	0.7832909	0.420721	1.0788234	1.525273	1.1074379	1.3506278	1.333898	0.8204910366218	2.849472	1.4036884
ENSG00000198680.4	TUSC1	1.2986534966448	0.467998512822131	0.00552170789311304	0.0930753827078216	16.2545	29.1084	19.8253	6.75419	25.7256	7.70632	4.2609	13.5296	9.34652	8.15556	10.9659	1.30839	4.15121
ENSG00000103494.13	RPGRIP1L	-0.83243355777037	0.30014786807272	0.00554719214148822	0.0933142552964826	1.87550389	1.3479348	1.209201	0.705714710726599	1.0470346	1.1939366763674	1.347916	1.7842661	2.744161	2.41929063058	1.7952798	5.628628	1.58859200057885
ENSG00000065970.8	FOXJ2	0.772223243568269	0.27842049010845	0.00554421411748844	0.0933142552964826	13.297972	15.657338	13.302044	6.620638	7.8907558	5.836963	4.0316702	10.604583	7.394687	6.121326	8.484249	5.448576	4.135704
ENSG00000196972.8	SMIM10L2B	1.54022182470692	0.555314406293193	0.00554392500376772	0.0933142552964826	2.67427	0.899573	2.44843	0.479162	0.59491	1.67094	0.359514	1.07332	0.474946	0.309667	0.917362	0.130952	0.0476132
ENSG00000157617.16	C2CD2	0.886049207560611	0.319576573692777	0.00556151358424822	0.0934916125286836	18.207987	20.7525685	15.765022	7.4779307	35.3186370074449	10.883393	7.7752021	14.103623271	8.733654	14.190014	9.780342	10.6909483	8.705435723132
ENSG00000166845.14	C18orf54	-1.02496612653228	0.369765085324593	0.00557235399447521	0.0935467432790293	0.6962658	0.337711	0.6528596	0.373709	0.403098	0.664801	0.2856512	0.9791687	1.222043	1.2946521	0.840828	1.528827	2.260876
ENSG00000185236.11	RAB11B	0.436868336978485	0.157595838047928	0.00556992739212976	0.0935467432790293	138.158691	108.637398	110.617512	88.857376	110.239854	74.889672	57.628841	111.923703	101.725305	82.95122	98.52245	68.796561	72.2302
ENSG00000125651.13	GTF2F1	0.384639902926392	0.138798321322443	0.00558476454496401	0.0936280478761074	49.41588658	45.931627	53.121651	32.638716	39.917553	33.476951	23.157889	42.400904	39.10727	30.172672	35.377303	49.141715	30.812778
ENSG00000183929.7	DUSP5P1	-2.49355132221703	0.899779333243892	0.00558343214145706	0.0936280478761074	0	0	0.0542669	0	0	0	0.0422234	0.2111	0.308533	0	0	0.609586	0.256891
ENSG00000259577.1	CERNA1	1.09927504747027	0.396771581858467	0.00559619061624655	0.0936597638141592	0.830715	0.968123	0.1917629	1.080862	0.464376	0.588336	0.2384963	0.474659	0.2950016	0.388259	0.536191	0.197336	0.284481
ENSG00000242258.1	LINC00996	-1.83134615736287	0.660961009947973	0.00559303527618548	0.0936597638141592	0.354491	0.0263519	0.165788	1.655095	0.250175	0.805738	1.309269	1.02102	0.549406	4.007559	2.245006	3.420796	6.594103
ENSG00000205837.7	LINC00487	-1.3345869718442	0.481723326173826	0.00559801134294368	0.0936597638141592	0.130129	0.176052	0.1269463	0.0974463	0.122039	0.4972331	0.546607	0.5532971	0.4640155	0.339091	0.971678	0.886242	0.1778512
ENSG00000105576.15	TNPO2	0.448132632863495	0.161789278202555	0.00560814744317603	0.0937639689865275	42.33131	42.867778	44.1984905	22.2907133	39.9703728	31.0534044	17.475139	37.807438	33.7467619	30.388952	28.2537498	33.399648	28.325841
ENSG00000120509.10	PDZD11	-0.530302539302543	0.191469803943402	0.00561181806704576	0.0937639689865275	46.34453	34.23477	36.834027	30.71434	33.591472	42.15655	46.78596	40.42888	67.25759	60.79076	47.13949	96.425984	57.46454
ENSG00000166592.11	RRAD	1.76988841383657	0.63925756293797	0.00562869163459736	0.0937925754196039	34.859	57.81522	70.30401	1.797779	17.86373	52.58515	2.04978	12.45378	3.1370311	14.51363	29.34828	9.77409	1.591772
ENSG00000080371.5	RAB21	0.909455837737442	0.328462824459237	0.00562589715889986	0.0937925754196039	32.36211	63.09451	33.30969	12.642226	50.51854	23.884332	12.567754	22.45308	19.51212	27.77276	17.543643	31.1952	15.75294
ENSG00000165156.14	ZHX1	0.694020453834768	0.250661211247052	0.00562702623911801	0.0937925754196039	22.35514	20.217416	19.808388	9.9254225	25.08935	25.663875	9.84624	21.487142	11.31818	15.43285	16.51143	12.118329	10.16842
ENSG00000261052.5	SULT1A3	-1.33097024600163	0.480632965911548	0.00561936128914591	0.0937925754196039	19.656658	6.836182	10.529943	27.189467	3.765107	8.9053765	42.510553	11.60769	29.641836	82.003382	23.372125	38.716783	33.9807681
ENSG00000166426.7	CRABP1	2.44508867033153	0.88332564410669	0.00563929754370474	0.0939060684515302	24.7681	8.49982	30.810386	0.137019	0.245391	0	1.960625	0.7408176	0.93001	0.45843	0.957882	0	0
ENSG00000211795.3	TRAV8-6	-1.795855857826	0.649118767640066	0.00566431721447526	0.094144179040303	0.27822	0	0	0.325422	0.128803	0.332577	0.438754	0.412557	0.402813	1.2116	0.379539	1.20289	2.10645
ENSG00000103355.13	PRSS33	-2.37417767665346	0.85853812698575	0.00568578373884328	0.094144179040303	0	0	0	0.0756487	0	0.08062932663	0.715860190633	0.033556172457	0.326792658439	0.349537438419	1.16927000922256	0.122314	0
ENSG00000258793.1	AL355102.4	2.03084430740175	0.734646513419771	0.00570305614796582	0.094144179040303	1.02718	0.451885	0.568699	0.072833	1.12982	1.3958	0	0.553132	0	0.0812408	0.169741	0	0.298285
ENSG00000183856.10	IQGAP3	-2.00847358886989	0.725991631867384	0.00566573387898307	0.094144179040303	0.937769	0.0838712	1.047786	9.802103	0.285574	7.396192	23.041807	3.1485226	12.4045863	19.868594	15.503408	58.678988	17.556716
ENSG00000148180.19	GSN	1.53666924157198	0.555823842304211	0.00569804896304857	0.094144179040303	611.690805697219	1153.480461	892.479359	262.017745	1896.101687	263.793856	164.8674048	816.649961	167.764846	175.388437	515.074871	123.200097237764	72.302475
ENSG00000284681.2	AC007240.1	-2.06270760753517	0.745965467737089	0.00568963466314193	0.094144179040303	0.160404	0	0.0852118	0.990793	0.0431815	1.272561	1.2616226	0.194399	7.5584395	3.106705	3.31733	3.821619	2.62378
ENSG00000226421.1	SLC25A5P5	-2.27523494182942	0.822858618074517	0.00569162511172724	0.094144179040303	0	0	0	0.1687	0.0672549	0.0571003	1.59219	0.0711247	0.415992	0.501485	0.32751	0	0.40336
ENSG00000149308.16	NPAT	-0.68345594529932	0.247176990703157	0.00569146309621611	0.094144179040303	3.5230571	1.898209923	3.5452686	2.957222	2.0678685	3.8331324	3.1365139	4.207471	5.4309336	5.189268	4.2624172	7.678453	7.1354132
ENSG00000100722.19	ZC3H14	0.313244149469889	0.113238473796981	0.0056707776366465	0.094144179040303	25.187237	23.5687416	25.155557	15.037326	22.4442	20.012663	12.848504	22.456456	21.03337	19.931156	20.5923592	21.0627936	17.425245
ENSG00000169764.15	UGP2	1.11664818691049	0.403927284217077	0.00570139100678411	0.094144179040303	97.4398320122	94.249606	102.559446	47.3503766	341.274012	78.42570041356	42.358376	85.111868	67.9610698	51.6338817	86.283149	65.416092	41.5320945
ENSG00000256278.1	AC048382.1	-1.81439295119719	0.65581137656808	0.00566375347761856	0.094144179040303	0.122868	0	0.186918	0	0.0573842	0	0.1454	0.242379	0.118108	0.21364	0.279062	0.233529	0.343917
ENSG00000203814.6	HIST2H2BF	-1.14938127474366	0.415779985026649	0.00570279689545027	0.094144179040303	3.607645	1.63222	3.896655	1.8183	2.7567174	2.2313848	6.6272209	2.0088141	7.8292036	11.660456	2.9758274	12.962952	2.9151419
ENSG00000140598.14	EFL1	0.492120150787285	0.178021531719547	0.00570301088238685	0.094144179040303	6.502426	8.709343	7.298098	5.710621	5.73442	8.2650852029	4.8315606	5.38764000128375	7.468923	4.75899	5.8331	6.36549100053099	3.99866400043243
ENSG00000215374.5	FAM66B	1.49500581424044	0.540954267391076	0.00571596059917617	0.0942942966844096	1.930564	2.108801	1.040335	0.4923722	0.3605821	0.480067	0.065277	0.866982	0.4274998	0.303597	0.6598711	0.261908	0.0962314
ENSG00000068650.18	ATP11A	-1.14081896849925	0.412829820744607	0.00572004768942014	0.0942988541470363	6.835244013	8.15778270114	5.975724365165	6.23980111	8.0662893	7.5923702439978	23.574629	8.983140964866	47.011824	13.4043861903	5.63852037878	12.933448	15.227283
ENSG00000134201.11	GSTM5	1.78815170766417	0.647227443325785	0.00573101141318546	0.0944166960181585	40.422303	27.7387916	26.499111	4.2462737	26.145183	4.646941	2.0108102	19.76259	3.69794500021154	3.6937867	8.550314067833	0.8195792	0.45669887
ENSG00000041515.15	MYO16	1.80333389343123	0.652956218337847	0.00574838382931046	0.0946398921199516	0.809743128624	0.3615480204717	0.5106280129336	0.0536480180058	0.7968820107726	0.0781989109233	0	0.06770561354	0.05124800963745	0.2615084281672	0.18032200495522	0.10801400162042	0.0906524102288
ENSG00000125991.19	ERGIC3	-0.644046680860126	0.233264553414312	0.00576222189950774	0.0948046415580578	173.686752571	144.362046	157.234905	202.476084	137.110048	169.80839	309.257632	202.148212	302.164712	425.43657	217.637401	247.337452	263.094546
ENSG00000019505.7	SYT13	-2.34565556441507	0.849638983472681	0.00576657387619155	0.0948132030341262	0.182976	0.272655	0.658944	2.4748	0.03118684	1.51321	12.4253	0.630717	4.7354	4.29826	2.63035	52.603906	0
ENSG00000160285.14	LSS	0.639316902917415	0.231624054046956	0.0057775003163695	0.0949297777746104	25.839527	21.790804	31.252453	26.0561507	31.553676	23.913408	18.2473947	31.7065851	13.1699614	14.16891	17.092019	20.521659	15.658027
ENSG00000178826.10	TMEM139	-1.71658711721631	0.622113934589474	0.00579287118966619	0.0950016800398187	0.690774	0.665163	1.1198195	7.664353	3.284634	2.534384	19.34195	2.333940861181	18.5184686713	5.958954	4.121333	28.336122	6.346338
ENSG00000145244.11	CORIN	-1.51663153637071	0.549575918539859	0.00578651364606286	0.0950016800398187	0.216437	0.263279	0.1439869	0.12096463	0.0710446	0.36333621	0.09135535	0.2298631	1.6634226	1.6752794	0.38175816	0.33718	0.6041720164404
ENSG00000259209.3	AC004943.1	-1.8520596054978	0.671218134710983	0.00579339402627142	0.0950016800398187	0.304729	0.166828	0.116617	0.1533318	0	0.0454855	1.062257	0.447376	0.491632	0.544205	1.0714894	0.218437	0.0459912
ENSG00000156787.16	TBC1D31	-1.16516808122072	0.422437645311851	0.0058120387061478	0.095244303167965	2.5197229	0.4051966	1.2075771	2.2399237007364	1.009348621	2.6274488	3.42691370134947	2.02618022488	4.02467	4.2563638	3.5733242	4.7694787	7.4149662
ENSG00000285848.1	AC025280.3	2.41798176821481	0.877028157832124	0.00583312725131193	0.0955266272890229	0.290836	0.515682	0.234193	0.0346672	0	0	0	0	0	0.0430089	0.040389	0.0421179	0
ENSG00000237476.1	LINC01637	-1.19388620390165	0.433296750257358	0.00586285523707669	0.095653670071248	1.24549	0.502361	0.526887	1.13326	1.06132	1.31917	4.5838	2.25496	3.79968	1.08384	2.07558	1.48836	2.154
ENSG00000239503.1	MARK2P8	1.24719847906191	0.452724877847178	0.00587153428842316	0.095653670071248	0.534545	0.904871	0.474432	0.208495	0.810882	0.370303	0.0527093	0.263658	0.256983	0.232385	0.242837	0.254163	0.320536
ENSG00000146151.13	HMGCLL1	1.694939641671	0.615440947557135	0.00588673046074072	0.095653670071248	1.393797	0.8028886	1.4888896	0.4642906	0.4794061	0.1412120064272	0.12691682651208	0.5934004	0	0.0777701242598	0.2585239	0.35266730177568	0.128101
ENSG00000196632.10	WNK3	1.24917487785848	0.453574337716088	0.00588594150385446	0.095653670071248	0.4259910246601	0.287558	0.431405	0.0679119	0.10765600051914	0.23236600491497	0.061448700448958	0.1984600135218	0.09217240611186	0.13520000737695	0.178815	0.073369600334835	0.03305090167869
ENSG00000104888.9	SLC17A7	1.80024406690417	0.653684646648304	0.00588727175261712	0.095653670071248	1.1078057	1.0520381	0.3703858	0.8675128	5.23734	0.3309724	0.271717	1.5811642	0.243312	0.188867	0.279758	0.0684443	0.174257
ENSG00000130287.13	NCAN	2.03650879594382	0.739401732804848	0.00588240000450765	0.095653670071248	0.046512	0.0313845	0.0329083	0.1134965	0.021817	0.0063967	0.00641002	0	0	0.0141049	0.021118	0.0219738	0
ENSG00000143384.12	MCL1	1.05980511342271	0.384722416425982	0.00587411795819366	0.095653670071248	232.99578	345.1731	288.8351	93.15325	610.2216	199.0816	78.28029	140.46195	155.23367	240.40487	82.04676	208.61612	168.202987
ENSG00000106018.13	VIPR2	2.180403649248	0.79117518145256	0.00585299914832087	0.095653670071248	34.191468	49.43149	18.704643	4.0735268	2.4117243	0.5415056	0.3198671	9.755137	0.5586179	4.196315	4.2382372	0.0737355	0.1373528
ENSG00000204588.5	LINC01123	-1.79846234864095	0.652805375794198	0.00586966591545842	0.095653670071248	2.853952	0.488458	0.170617	5.28306	0.226773	3.495694	9.18808	1.955411	14.20739	14.73333	4.570731	21.47275	6.42779
ENSG00000204516.9	MICB	-1.50739267183786	0.546949289109182	0.00585128559985626	0.095653670071248	1.7215089631322	0.727349	1.05549384750831	3.51744	1.70560500361765	2.477568	1.271244	3.67788	3.40372	6.939384	2.209238	21.92062	9.62285
ENSG00000206052.10	DOK6	1.5177982703799	0.550791061824048	0.00585721019947164	0.095653670071248	1.61357	0.620032	1.86255	0.391082	0.454616	0.0865123	0.3622265	0.35879	0.343611	0.160667	0.4479575	0.158055	0.0602734
ENSG00000146828.17	SLC12A9	-0.709896499675717	0.257704121007912	0.00587466995853666	0.095653670071248	22.69066	8.123375	16.156292	16.432233	12.3160019	17.831845	20.025371	21.374642	49.981381	33.193488	19.370206	33.362681	22.497991
ENSG00000147162.13	OGT	-0.840527062649496	0.305233993471341	0.00589232686332028	0.0956729844047639	57.009979	37.8244024	44.852152	66.832061	36.12978	49.461146	78.578191	72.032592	121.398334	85.500581	40.448308	182.403107	111.159954
ENSG00000136514.2	RTP4	-1.40253334002122	0.509415432610541	0.00590120193196348	0.0957542569222533	5.23336	1.39923	2.29478	7.32657	0.973413	3.86843	12.2118	4.20703	6.87653	7.54605	6.94416	30.3634	10.2515
ENSG00000100385.13	IL2RB	-1.69086862714784	0.614207844671999	0.00590652800585052	0.0957778738563375	2.15773	1.25313	0.858636	5.714982	2.79865	5.16039	2.4729	3.93576	6.10707	16.5164	3.445515	16.180576	40.971742
ENSG00000152359.14	POC5	-0.875625173753616	0.318209664702629	0.00592824595663245	0.0960670898473281	3.7369691	0.94972121204	3.74308626	4.351221	3.4436366	3.4522522	4.9095549	4.6114567	8.022431	5.364358	6.304912	10.854174408228	7.54527039
ENSG00000182749.5	PAQR7	0.74226414155932	0.269800835840699	0.00593853868369734	0.0961709029634101	8.55194	4.76593	6.54263	5.53338	4.95157	11.1514	2.91173	6.9853	4.69901	4.24078	6.12944	3.69131	3.04237
ENSG00000257900.2	AL162632.1	-0.850845208150134	0.309468048352057	0.00597081532107206	0.0965672059607373	7.44861	3.86194	2.83572	4.50276	5.30543	4.39006	11.7151	4.50592	7.75138	10.6463	8.57881	12.8016	8.60982
ENSG00000184925.11	LCN12	-1.77325001394292	0.644919642700428	0.0059673992194473	0.0965672059607373	0.96581	0.4681834	0.7403805	3.158554	0.1392745	1.973958	4.117022	0.6049367	4.703115	4.314614	3.294295	5.2002	17.590636
ENSG00000276434.1	AL136221.1	-1.89432110149202	0.689174617728166	0.00598356085169141	0.0967101327727654	0.32485	0	0.165149	0.759854	0	0.389133	1.28067	0.482019	3.92425	0.990842	0.443302	0.626191	3.10393
ENSG00000134851.12	TMEM165	0.769018795480478	0.279884025447539	0.00600270196752169	0.0969000156509501	78.232585	201.79112	99.115175	60.525959	97.169336	86.368028	44.768717	88.930788	78.974658	83.522931	64.028907	57.071864	53.597028
ENSG00000170775.2	GPR37	2.03689143465263	0.741730165007043	0.00603018778272586	0.0969000156509501	2.38724	2.09988	1.51601	0.15291	0.284294	0.9127	0	0.157944	0.375835	0.293949	0.663228	0	0.0856473
ENSG00000188215.9	DCUN1D3	1.19153772111278	0.433894776171369	0.00603002116085849	0.0969000156509501	8.859828	17.37572	7.990384	2.34825	21.10543	5.18058	3.120522	6.99744	8.857805	4.72032	3.2830969	4.976371	2.710953
ENSG00000237361.2	TUSC8	-2.49214291953743	0.907243825587909	0.00601544280598795	0.0969000156509501	0	0	0.119194	0.405806	0	0	0.203798	0.0637085	14.32494	0.0561529	0.410757	0.0613981	2.042792
ENSG00000164181.13	ELOVL7	-1.27271353688515	0.46334733995071	0.00601833587723628	0.0969000156509501	1.787469	1.924589	2.221922	0.767656	4.237408	2.8779810625405	3.684741	7.657666304921	6.831099	3.851006	1.597793	17.826039	6.1984266
ENSG00000197308.9	GATA3-AS1	-2.16586088785665	0.788290302667267	0.00600437778687714	0.0969000156509501	0	0.133282	0.0252838	0	0.0234048	0	0.063918	0.0245861	0.0478758	0.2065255	0.202955	0.21904481	0.2992714
ENSG00000164220.6	F2RL2	-1.57719403920272	0.5741382317335	0.00601315361319787	0.0969000156509501	3.89106	3.60875	3.37403	1.6700749	0.233823	0.539652	2.06329	2.2099539	3.8732726	16.3131	12.0929236	11.537278	8.3753572
ENSG00000020577.13	SAMD4A	1.82136712230493	0.663252187544231	0.0060305526006249	0.0969000156509501	18.92383236	134.792689	32.6355969	2.91050672	32.997677	1.3613158	3.771216	20.12393754	7.717882	7.2201926	14.6179344	9.5196137	4.10519716524
ENSG00000196639.6	HRH1	1.70170025072756	0.619618829438489	0.00602594480414006	0.0969000156509501	3.9771695	35.89353	6.198655	0.900737	24.01204	1.48771	2.7800425	5.273171	5.413408	3.9677	2.711466	2.569203	2.1566448
ENSG00000279031.1	AC004232.3	-1.457188705241	0.53068006379483	0.0060347123657291	0.0969039308825222	0.463411	0.449067	0.157033	0.843084	0.71398	0.246542	2.31403	1.22218	3.13362	1.88428	0.562049	0.743625	1.10728
ENSG00000175606.10	TMEM70	1.33973444304345	0.488049785045971	0.00604966246300372	0.0969608432482028	36.544602	132.890235	41.16806	9.272422	79.167971	12.363814	13.27146	19.629278	25.8542940267397	24.490172	20.102221	20.0322380689195	23.894032
ENSG00000174574.15	AKIRIN1	0.91100009057587	0.331864307982729	0.00604928066242918	0.0969608432482028	48.196231	75.824412	55.71221	16.8942598	60.561924	24.287547	14.55929	33.063547	21.617664	31.9657	26.651922	42.849632	19.0787
ENSG00000179141.9	MTUS2-AS1	2.36542155728589	0.861807848437717	0.0060562477474953	0.0969608432482028	0.112178	0.955935	0.142091	0.0218818	0.15777	0	0	0	0	0.0487214	0.0966148	0	0.0425441
ENSG00000165868.14	HSPA12A	1.56771023850101	0.571191077346335	0.00605784860221142	0.0969608432482028	13.862067	11.511488	16.267856	2.492784	25.82450074247	1.909831	1.149286204	8.487508	7.659222	2.6482858	5.055718	2.46983301	0.758546
ENSG00000238260.1	AL513320.1	-1.6216107900239	0.590797182429811	0.00605506944802423	0.0969608432482028	0.476107	0.345762	0.120893	1.20669	0	0.189367	1.97109	0.823169	1.14762	1.03616	1.29859	2.2807	2.27862
ENSG00000162510.5	MATN1	1.67873080574928	0.61172982205664	0.00606519757955574	0.0970157169399526	0.1628669	0.666264	0.1375746	0.2147449	0.154113	0.0220238	0.0109918	0.13381966	0.0818493	0.0422702	0.0639328	0.0644929	0.0670517
ENSG00000168824.14	NSG1	1.69471396435135	0.617678654922298	0.00607543127177061	0.0971166323126381	8.2751939	1.8222482	6.2512396	5.2601139	1.257193	21.92201349	3.4089450177862	1.0047851	0.660485	3.9362174	0.8747945	4.380869	0.567402
ENSG00000274963.1	RN7SL600P	1.49068004544268	0.543463852662412	0.00608947771918397	0.0972783254752791	6.22022	12.5906	10.0407	4.17642	17.545	3.97477	4.2638	7.52328	5.66422	1.95162	0.813654	0.86773	1.78238
ENSG00000135870.11	RC3H1	0.339160803097221	0.123685086349083	0.0061041851055654	0.0974503615723973	6.9886825	6.4978469	7.7897251	5.1935598	5.569596	5.321903	4.7398348	6.4786611	6.2417649	5.601292	5.216862	4.6013741	4.5548715
ENSG00000215483.10	LINC00598	1.63787664295142	0.597466063958931	0.00611832240085139	0.0975742000017476	0.459936	0.1419794	0.6988534	0.2581946	2.8668919	0.1764541	0.21088342	0.3429498	0.2906232	0.2501107	0.3047147	0.0895815	0.1524714
ENSG00000154359.12	LONRF1	1.12265888421326	0.409545657046024	0.00612096246959475	0.0975742000017476	17.6878	39.965364	32.719223	8.639892	19.295161854	11.785919	3.70738	22.024124	9.9268204	6.125986	10.7875701	16.318004	6.7060767
ENSG00000070748.18	CHAT	2.54437053871188	0.928236734392854	0.00612377177622607	0.0975742000017476	0.2988312	0.0253734408	1.491887774	0	0.0776369	0	0	0	0	0	0	0	0
ENSG00000130382.8	MLLT1	0.728567526053983	0.265828222562659	0.00612999533001349	0.0976105112234131	44.265800295393	65.0538	41.70398	20.436563	37.60476	19.248107	17.854719	32.0434998	28.022628	27.231357	26.222748	22.14734	20.069601
ENSG00000226084.5	AC113935.1	1.86315575862774	0.680127820694062	0.00615476904507577	0.0978506146038107	0.821031	1.05415	0.221049	0.799941	0.264914	0.208532	0	0.182343	0.181519	0.267214	0.176758	0	0
ENSG00000262703.1	AC009121.1	-1.81463867621351	0.662445103893218	0.00615693703528524	0.0978506146038107	0.0561491	0.0543026	0	0.350445	0.052479	0.310889	0.753074	0.110747	0.485621	0.536896	0.561085	1.8661	0.583892
ENSG00000117000.8	RLF	0.822457534181033	0.300198142682908	0.00614923690314797	0.0978506146038107	5.90189	13.9707	7.16455	3.19778	6.56158	4.2549	3.00425	5.1573	3.98343	4.00542	4.18854	4.94487	4.04458
ENSG00000171724.2	VAT1L	1.76307289336797	0.644009649033839	0.00618799290423437	0.0979792422038642	7.4727	1.92864	8.76319	1.14671	0.15624	0.22939	0.579819	0.996854	0.571539	0.854734	0.213996	1.17942	1.18883
ENSG00000181852.17	RNF41	0.613416193966812	0.224032694112665	0.0061801762867438	0.0979792422038642	27.0642133	18.546769	22.635706	8.36385	24.313421	15.042143	8.7410114	17.236725	13.786674	15.277469	14.68342	15.64044	10.370556
ENSG00000180257.13	ZNF816	-1.36195951719093	0.497536625295609	0.00619259003156149	0.0979792422038642	2.850909	0.716936	1.493782	3.985923	1.323799	3.203609	12.3936	1.750816	5.9400573	6.730341	2.925062	11.08961	6.045404
ENSG00000099812.8	MISP	-2.27563126497312	0.831295765127226	0.00619173792369688	0.0979792422038642	0.282235	0.145434	0.114371	31.222204	0.388526	12.1914	103.70397	4.33729	90.015778	45.260546	13.7704	184.81106	118.810951
ENSG00000070614.14	NDST1	0.953083560628964	0.348107994375996	0.00618335858567198	0.0979792422038642	25.626095	23.5703693	25.153299	6.7688638	30.888786	30.886779	5.6533145	25.2352959	18.1259806	14.2471287	11.180097	10.853798	9.4335234
ENSG00000145349.16	CAMK2D	0.777785657101672	0.284133285844287	0.00619274741591609	0.0979792422038642	22.6484148	31.6240560065896	23.9099345	11.340028768	24.550456	13.3902259	9.1754997	23.265206523	11.66217	12.805681	15.9018398	14.371599	7.4241954
ENSG00000144485.10	HES6	-1.06918626745326	0.390491093015542	0.00618036533699132	0.0979792422038642	6.746612	10.166292	6.58335	7.611808	2.358228	3.275329	11.678984	6.799371	30.586234	10.782186	18.951605	11.44486	12.394242
ENSG00000122779.17	TRIM24	-1.16707161089776	0.426385288501794	0.00619779520105003	0.0979964487220338	5.30475	4.586989	5.65123	6.5787884	3.30713	6.0508893	6.01102	5.1106201	12.8303096	13.609351	5.857357	41.157382	14.590297
ENSG00000244041.7	LINC01011	-0.724570248560532	0.264745412105431	0.00620293113052387	0.0980150260694848	2.78295	1.385999	1.8767805	3.191679	1.074586	1.598112	2.181181	5.143121	3.78651	3.444694	3.443313	4.5375274	3.473005
ENSG00000176695.8	OR4F17	-1.00173326213918	0.366087847129714	0.00621306968411679	0.0980545426470037	1.9305	1.3436	2.00263	2.68121	0.672205	2.09298	5.66154	2.58153	4.0999266	3.83585	2.65241	3.24757	5.32917
ENSG00000160229.11	ZNF66	-1.34657620914743	0.492114963869967	0.00621335715782994	0.0980545426470037	0.109247	0.174582	0.4004217	0.4608575	0.5549199	0.6927056	1.0168601	0.8311099	0.960436	1.369402	0.3775169	2.454885	1.620893
ENSG00000120709.10	FAM53C	0.799773986351514	0.292372373258201	0.00622924742928389	0.098214991449352	27.091304	27.521187	26.832323	7.98401	21.764702	12.973317	5.93938	16.312542	12.070204	18.442571	13.076924	11.077577	12.424904
ENSG00000085063.15	CD59	0.827301660374467	0.302448567599386	0.00623146237928804	0.098214991449352	303.667245	369.593542	249.742803	263.008694	653.467525	350.346678	206.799275	306.24299	185.266482	243.03126	195.19732	343.740661	112.681883
ENSG00000139197.10	PEX5	1.34607096668549	0.492241069787828	0.00624605391818011	0.0983823069416721	25.503115	123.6960584	25.908019	9.61424836	30.0961	12.9650274	7.6569007	21.935712	24.969535	15.1520457	14.398902	13.427251	12.185555
ENSG00000102900.12	NUP93	-0.567772505973349	0.207719304708252	0.00626909739675077	0.0986824523426194	23.41414	20.4258949	19.876047	33.1415939	27.3656347	27.682992	36.2226068	34.73167924	46.060291	56.72111653	37.58282	45.7419993	36.99304312
ENSG00000259485.1	LINC02253	-2.50733913124046	0.917393495736275	0.00627390026430388	0.0986952714813728	0	0.195618	0	0	0.185712	0	0	0	8.549148	2.534669	0.367356	0	3.2543717
ENSG00000125826.20	RBCK1	-0.953058543833264	0.348743463776619	0.00627916705089592	0.0987153676457557	81.0832670610173	49.313962	67.5611480002506	63.7156630006416	66.50670015544	67.0808988176	82.51766232266	79.42611979	107.230450184331	130.079066027654	74.1625500018991	357.71967565747	186.525371909423
ENSG00000213024.11	NUP62	-0.691419881614611	0.25302854056271	0.00628410476082824	0.0987302681312348	26.830283633	14.82151719645	22.4000910018037	22.581333	24.821272844317	23.747719	41.39377067	24.2382308374726	41.819501	38.355647	26.0437879	59.074057	47.4426184
ENSG00000131748.15	STARD3	-1.24619036851039	0.456111497135187	0.0062911875742956	0.0987788302829598	32.608505	23.210833	27.8544910939	35.641959	34.6593415	31.738669	113.90156974	43.743408	267.951837	54.1364	29.727923	45.965164	49.827727
ENSG00000111907.20	TPD52L1	1.78355661944897	0.652935359659126	0.0063028081894242	0.0988781152552405	15.9025181	26.69329464	12.00911	7.82517635617	12.70501819	140.615010646748	8.973394	24.2695306	9.4066997	8.736060213482	12.7501549	1.0191927	3.0168178
ENSG00000065609.14	SNAP91	2.18602671689181	0.800315349440037	0.00630550276309434	0.0988781152552405	3.767632	2.0147421	1.9988057	0.5471125	0.390121	0.31426956	0	0.8555451	0.252520122	0.2189848	0.24311610295185	0	0
ENSG00000229117.8	RPL41	0.576804410601977	0.211188543132362	0.00630984864461377	0.0988836001969396	5711.03154	6171.05583	4935.17523	4458.73419	4003.66954	6229.2672	2302.06552	6093.58885	3441.26346	4383.3938	4377.33145	4431.52572	2433.76665
ENSG00000277299.1	AC084876.1	-1.07940524787168	0.395376047663977	0.00633204116440618	0.0989806434701395	2.04535	0.999389	0.717651	2.26248	1.18181	1.62432	1.58899	3.10191	3.86686	5.06324	2.3157	2.57389	6.57544
ENSG00000271550.1	BNIP3P11	-1.52675252501977	0.559215292901053	0.00633017734099171	0.0989806434701395	0.138345	0.268033	0.281167	0.539391	0.384318	0.110242	0.763599	0.547039	0.400582	0.963932	0.503264	2.5252	0.882074
ENSG00000077348.8	EXOSC5	-1.06761900341394	0.391040519389545	0.00632958257515089	0.0989806434701395	8.626393	6.655684	8.08969	11.101983	9.124631	18.531229	36.666033	9.377283	26.60898	28.510264	12.564212	34.22758	23.490032
ENSG00000267303.1	AC011511.4	-0.593162801262123	0.21723585573566	0.00632380706601091	0.0989806434701395	12.0165	11.9459	12.1789	16.5934	16.0373	11.5746	14.7071	15.3746	27.232	23.9	22.0571	28.3068	26.9769
ENSG00000084754.11	HADHA	0.544479332269561	0.199470339991426	0.00634063042252634	0.0990523357357414	107.992485	99.731705	119.891072	66.290059	117.600506504	94.014054	53.725814	108.70137	95.198524	53.191301	81.96717	93.387624	49.0806626105
ENSG00000280587.1	LINC01348	1.95225938917157	0.715342736911603	0.0063502724201213	0.0991403728933134	0.114891	0.745274	0.0332535	0.358593	4.20678	0.24576	0.246074	0.0970048	0.487867	0.156781	0.178835	0.247874	0.0657594
ENSG00000183379.8	SYNDIG1L	1.08192634111159	0.396511030562833	0.00636007173703716	0.0992307535516926	0.316932	0.262493	0.183491	0.1359297	0.191148	0.160656	0.1374142	0.178426	0.10857	0.0393232	0.102783	0.0641633	0.10881
ENSG00000162735.18	PEX19	0.94258434288628	0.345520467952925	0.00637170887628547	0.099287113440607	37.428434	38.197718	37.576261	13.176669	67.0156012	20.394949	12.779082	33.815822	19.340736	17.560152	23.901453	22.404312	10.855154
ENSG00000112118.18	MCM3	-0.943369631201226	0.345796306263622	0.00636987704035695	0.099287113440607	18.88553288493	14.141871309426	18.437529391381	30.36668707507	17.18655917657	31.846640276503	26.2648000338549	27.137840300268	50.88422063243	56.75462330548	33.58535425861	108.807311125126	42.755879633378
ENSG00000060558.3	GNA15	1.61631516876275	0.592780363264437	0.00639774006914222	0.099630005041488	4.36783	4.107571	2.68662	5.8424078	13.223257	53.80185	2.595022	2.5361	5.66192	8.336516	4.86357	3.93099	4.33094
ENSG00000271826.5	PLS3-AS1	-1.7711796789672	0.649692062445974	0.00640713976009357	0.0997136310462361	0.225073	0.0310764	0.0977551	0.0250872	0.0903998	0.12688	0.126849	0.285181	0.216	0.195528	0.379606	1.82527	0.0772407
ENSG00000149636.15	DSN1	-1.18644503150056	0.435272048200381	0.00641545679213363	0.0997803132126629	5.836911166385	1.860064	5.3350401	12.729070280558	3.474753	11.190175670318	15.027745	8.8211890133029	18.4844	19.924917151173	13.039664	24.660673	26.2066335
ENSG00000280758.1	AL356481.3	-1.06865151018933	0.392117050097345	0.00642356840631322	0.0998437187275255	0.937483	0.778335	0.816477	0.626603	0.642493	0.42671	1.68963	0.794242	2.58463	1.86606	1.09609	1.15724	2.43896
ENSG00000100412.15	ACO2	0.602706145783595	0.221181574419353	0.00643135022831173	0.0999019217825323	66.400171	62.40576	95.687644	44.4838245	80.889109	51.805231	37.8502228	61.78526	45.401736	37.147505	62.604341	60.163199	30.979377
ENSG00000253988.1	AC079015.1	-2.12175225454988	0.778948129667247	0.00645221958554759	0.100163220605003	0	0	0.128847	0.395626	0	0.201927	0.100013	0.250674	0.367021	0.552162	1.8452	0.60825	2.62949
ENSG00000164411.11	GJB7	-2.47200197948806	0.907743263672198	0.00646452463770329	0.100291324238224	0	0	0	0.211115	0	0.0190456	0.952785	0	3.71864	0.470886	0	0.616181	1.60585
ENSG00000189430.12	NCR1	-1.73375204654535	0.636724708531176	0.00647072318508435	0.100300225899822	0.142366	0.13761	0.144291	0.258543	0.366768	0.1241806	0.298789	0.092035	0.3952417	0.573637	0.470467	0.888021	3.238572
ENSG00000172650.13	AGAP5	-0.75756927505301	0.278243008659975	0.00647529153414377	0.100300225899822	7.909779	3.031967	5.756673	6.280158	3.967798	7.03732	12.82293	9.531572	13.44429	9.88232	5.725362	11.93204	9.71340438
ENSG00000162913.9	OBSCN-AS1	1.47252191485238	0.540853546704849	0.00647725847597154	0.100300225899822	0.832128	0.708382	1.221827	0.6419363	0.392695	1.761727	0.218128	0.831245	0.4260315	0.263208	0.4326616	0.0176208	0.266104
ENSG00000132467.3	UTP3	1.06220611297744	0.390220628685445	0.00648752814512024	0.100396425235147	16.2869	57.823	20.7447	11.8496	40.3839	18.9646	7.32535	15.3343	15.3683	15.8951	15.6187	9.36006	20.5021
ENSG00000197614.10	MFAP5	1.89048950370344	0.694820894770714	0.00651182489171043	0.100586255613797	23.8162885	41.29512455	9.1746367	12.95422	242.561344	7.5765431	4.189949	26.264562	36.755095	10.027491746	10.732385	1.9277265	7.370126
ENSG00000258116.1	PPIAP45	-2.30260788997875	0.846173150354916	0.00650450429914121	0.100586255613797	0	0	0	0.141633	0	0.290606	0.143241	0	0.878671	2.85058	0.165311	0.877273	0.867337
ENSG00000271119.1	AC026412.3	-1.44252177056992	0.530178741950856	0.00651198955317447	0.100586255613797	0.206387	0.132991	0.313757	0.348898	0.0644574	0.190073	0.43425	0.271208	0.990463	0.567803	0.187439	0.618561	1.70758
ENSG00000148053.15	NTRK2	2.0731575053742	0.762548196673766	0.00655344159427212	0.100911581985229	2.931897	3.714586874448	3.4492071933	0.1167939	21.835157472912	3.356221986379	0.38893843	3.525966907	1.3661018173	0.270762	2.019284544912	0.0293988	0.11698853
ENSG00000237892.1	KLF7-IT1	1.60275892631568	0.589433933422218	0.00654500388075491	0.100911581985229	0.220802	0.85507	0.336322	0.344398	0.410208	0.263255	0.0870631	0.109046	0.106397	0.0960875	0.200724	0.211285	0.176193
ENSG00000100445.17	SDR39U1	0.476399417169134	0.175216817441057	0.00654966808249115	0.100911581985229	75.742684	62.407742	64.548663	57.432433	58.27558	43.264117	35.078347	67.180677	40.7307768	40.642563	55.662672	41.882927	47.336477
ENSG00000258102.3	MAP1LC3B2	1.39412485927226	0.512764868497334	0.00655115883397217	0.100911581985229	0.967307	1.778662	1.039138	0.115109	0.519803	1.2780354	0.0977945	0.413458	0.4018256	0.6173345	0.400683	0.454055	0.197804
ENSG00000135845.9	PIGC	-0.335092242171342	0.123233370091893	0.00654463491685738	0.100911581985229	21.274802	12.403468	18.280826	15.16709	12.954062	15.758318	18.182364	23.373453	27.242695	24.302561	22.206938	20.901643	17.775895
ENSG00000136928.6	GABBR2	1.7537741879229	0.645182790429282	0.00656263645328866	0.100990322783973	0.1403089	0.278043	0.163965	0.11194102	0.1081854	0.0212488	0.1131598	0.00885731	0.0258604	0.0312344	0.0244966	0	0.0288365
ENSG00000173120.14	KDM2A	0.514302824350318	0.189242911803809	0.00657401806545635	0.101102596040844	46.275345	75.902569	59.759522	37.257567	53.3324867	46.4438777	26.783904	47.651897	38.6894806	39.872561	38.4434295	51.72133289	44.042379
ENSG00000262454.3	MIR193BHG	1.37421488173211	0.505774867174071	0.00658669401337948	0.101234623205637	1.629237250373	2.7626930269904	2.6949951	1.3506988	6.0556620173022	0.8802383	0.32120700774996	1.7446528275111	1.441372519351	0.7412101	2.1317059488597	0.3910870104292	0.4329666051794
ENSG00000115392.11	FANCL	-0.620479198940184	0.228383840341156	0.00659112108517128	0.101239783521144	17.572396	7.940187	14.37857	15.0745427	9.367825	13.742655	16.752246	17.355772	24.996428	23.13115	15.092543	31.824459	25.223449
ENSG00000005981.12	ASB4	-2.38557270503127	0.878158129089525	0.00659634528695308	0.10125717377522	0.027728	0.254685	0.0421307	0.1123086	0.0785533	0.1047563	6.135182	0.2076827	0.1268841	1.626942	0.0503519	0	0
ENSG00000197632.8	SERPINB2	2.49973165004975	0.920408278487851	0.00660970053454595	0.10139928067411	0.117351	3.070403	0.505405	0.183126	29.807818	127.840784	0.0343666	0.318008	9.267901	0.0845762	0	0.527167	0
ENSG00000110422.11	HIPK3	1.04888702410347	0.386315080020444	0.0066254232847514	0.101514612496083	28.147772	47.38161	37.056955	10.018761	33.5441	13.073766	6.552244	31.98897	12.700139	11.623377	15.394569	11.486127	12.316341
ENSG00000116574.5	RHOU	1.25477489165585	0.462126868501507	0.00662322861958945	0.101514612496083	36.934	22.9594	43.0966	14.25	21.2501	3.01768	11.0361	17.9748	10.2082	4.84282	11.5608	5.44284	6.52652
ENSG00000249923.1	AC007663.2	-1.78110763446585	0.656241423404085	0.00664552501029111	0.101759601720083	0.148984	0.0478932	0.0251091	0.0386715	0.0464874	0.1759	0.684377	0.171087	0.736945	0.624201	0.13502	8.47809	0.0200934
ENSG00000184678.10	HIST2H2BE	-1.08796606147398	0.401024578570549	0.00666839407825964	0.102003425909027	9.56439	7.69623	12.4112	3.61185	6.02066	4.03534	17.9817	6.25789	13.564	33.2255	9.45238	27.9434	10.4776
ENSG00000262576.2	PCDHGA4	1.24431471362886	0.458700261824297	0.00667381477254859	0.102003425909027	1.201836	0.717996	0.955582	0.212514	0.778362	0.113382	0.163046	0.487346	0.470856	0.161092	0.262215	0.175682	0.258622
ENSG00000000460.16	C1orf112	-0.971782345048938	0.35821248284136	0.0066704141698396	0.102003425909027	1.926053	1.1246902	2.3275225	1.694286	1.1318701	4.12660489	2.87999160045409	2.684853	4.907644	4.6760652	3.587236	8.849279	4.94647
ENSG00000160789.19	LMNA	1.35984540396867	0.501360675458083	0.00668161418540345	0.102059594455437	247.334448	918.063717009888	288.54606	133.763039	1052.537796	189.750502112	170.8255536	325.558728	205.580367	179.505204	179.40353	243.819010003724	44.846163
ENSG00000182586.8	LINC00334	1.21102823644214	0.446615837055334	0.00669662453110523	0.102225770525724	0.445471	0.442369	0.618819	0.2373905	0.4222489	0.310191	0.164483	0.301008	0.186043	0.128437	0.33483	0.146433	0.0395554
ENSG00000151503.12	NCAPD3	-1.02092005902735	0.376585095025473	0.00670817724568673	0.10233899256752	4.2727829	2.889051	4.211658	8.2039964250439	3.7927825	9.926609	6.6615073	8.6434541321	13.1412345604451	14.2602766128479	9.78273630217101	18.2801516461	21.2641189221015
ENSG00000117322.17	CR2	2.31891946024123	0.855568447170102	0.00672052498645246	0.102464196420065	0.261238	0.0649821	0.0806641	16.097083	0.0256723	15.0638335	0.15399	0.0538494	2.620414	0.310286	0.803238	0.17183	0.44238060239
ENSG00000204710.2	SPDYC	-2.51861503311273	0.92934966275413	0.00672663050591578	0.102494132924191	0	0	0	0	0	0	0.0501127	0.0626599	2.07635	0	4.38633	0	0.0507975
ENSG00000275342.4	PRAG1	-1.24739580900162	0.460424205197453	0.00674392442189805	0.102568168297398	1.947335	0.710881	1.135296	4.296878	1.861228	3.4165	8.61518	3.73093	5.04654	4.14841	11.44446	6.53039	3.54979
ENSG00000049239.12	H6PD	0.716701093822155	0.264512198246023	0.00673806407590228	0.102568168297398	17.9462025	28.386601	14.4795172	10.6768065	15.5787521	10.760139	7.9487954	17.039006	15.2271615	9.0008338	9.4483915	10.5061647	7.26560295
ENSG00000258472.8	AC005726.1	-1.08936000329171	0.402066535879332	0.00674045505811867	0.102568168297398	3.40684	1.610482	2.01776	4.653884	3.82195	4.181682	13.027003	3.765406	5.32322	9.00553	4.44758	10.25795	8.449012
ENSG00000143369.14	ECM1	1.68441841143631	0.621982351767404	0.00676604491671642	0.102841389105742	19.80664	20.790247	14.71774841	11.594240001792	76.371333	243.576466	10.621216	28.070759	45.678374	19.875804316507	15.553549	16.458986	6.3582723
ENSG00000130699.18	TAF4	-0.876310863655832	0.323627689339485	0.00677359919319662	0.102893009229988	7.671775	4.8554821	5.5789208	4.8654892	5.838963	6.243155	7.732804	5.871047	11.577141	12.721768	6.185703	27.723263	13.17847
ENSG00000142661.18	MYOM3	-1.86454559700112	0.688756820141697	0.00678702441696425	0.102907425979032	0.0806362	0.2142559	0.0512481	0.03145922	0.3560241	0.2590422	0.26437722	0.493223	2.6100115	0.4288885	0.0549151	0.2260023	2.285054
ENSG00000091640.7	SPAG7	0.593963119474694	0.219400196512775	0.00678506574829727	0.102907425979032	80.046631	83.226145	88.91261	49.448171	74.914967	63.585251	32.989692	78.223446	50.341923	51.872969	74.727286	38.904843	43.392604
ENSG00000102287.18	GABRE	1.6938546623538	0.625628553341459	0.00678033816656977	0.102907425979032	18.0253501	20.005945	9.55562	3.339879	99.093347	39.825391	2.95818768	13.17053143772	24.831626	14.3239222	7.197869	2.0442715553841	3.7502032
ENSG00000104765.15	BNIP3L	0.782946221733665	0.289327438224215	0.00680804970346946	0.10303681340205	43.811478030206	28.55964	34.574391	14.0042552062	64.921580961	36.438655	16.4388	29.577749	22.279092	21.67591	27.22109	29.49791	17.00339
ENSG00000124104.18	SNX21	1.14500294494428	0.423102546917572	0.00680566718336009	0.10303681340205	36.392876	24.091298	29.24715	9.127857	38.961807	10.030485	7.381062	26.24335	9.19481	7.357801	15.252821	12.2645941095	3.854639
ENSG00000150656.14	CNDP1	-1.98049178788985	0.731769822366132	0.00680086832128939	0.10303681340205	0.217887	0.170581	0.0388543	0.0598168	0.0137151	0.0747684	0.2427459	0.2814691	1.2089379	0.0126825	1.246851	0.6500811	0.06137468
ENSG00000281344.1	HELLPAR	-0.759130405782714	0.280565317668297	0.00681570607447818	0.103089637416236	0.174029	0.137006	0.14367	0.231487	0.162598	0.155226	0.371342	0.231183	0.343801	0.338481	0.226829	0.217343	0.427626
ENSG00000185963.13	BICD2	0.931655696702818	0.344392254526627	0.00682598333822603	0.10311902179756	15.72897	14.57186	14.86404	4.33835	14.81013	28.0535	3.83264	11.84152	9.37919	7.84673	10.49571	11.25327	7.33437
ENSG00000161960.14	EIF4A1	0.977667438110777	0.361382637633686	0.00682319334151578	0.10311902179756	359.722866	1060.18546308478	457.7897150146	279.020663197096	1199.8623620428	566.067919801898	245.573435	360.9570982	408.08476632065	487.938393	239.911473802	523.861252	304.290704101092
ENSG00000153250.19	RBMS1	1.22237612227606	0.452084794374023	0.00685381877344925	0.103282351918847	45.7375976	108.853763	38.058625	17.7704539	99.7308417	18.3065392	10.956112	41.21005	27.8734934	30.09433	30.106785	12.720326	20.903185
ENSG00000280128.1	AL662795.2	-0.462717746442168	0.171143787591437	0.00685766434441973	0.103282351918847	5.49014	3.33738	3.51394	2.8634	3.33838	4.11122	3.97026	4.89937	7.24261	5.94979	4.65948	6.03261	6.90394
ENSG00000160410.14	SHKBP1	-0.862118272444268	0.318799026915713	0.00684548818119002	0.103282351918847	42.52452537148	20.908575	32.833205	71.318642	40.5451287517639	44.024562	82.0824	49.963488	96.811426	90.608251	62.634767	112.477108	107.3989427
ENSG00000145860.11	RNF145	0.583068161861177	0.215645463340541	0.00685458365818694	0.103282351918847	49.02489355	43.835627887	42.88035862	38.3342848637385	56.9510400005246	60.356505803	28.742716002003	40.40417831	37.9571670164	55.715797304662	29.922252	25.4369521965	31.0932861956
ENSG00000182950.2	ODF3L1	1.80574426014799	0.667802599533712	0.00685084271630088	0.103282351918847	1.96777	6.7817	2.71135	2.47998	5.66258	0.518549	0.835963	2.78603	0.678599	0.438533	1.19165	0.0957395	0.0403706
ENSG00000100564.8	PIGH	0.5006971717539	0.18522985185608	0.00686934431571023	0.103395331564629	18.931343	20.452537	14.346832	19.854385	18.3253920141985	17.013105	10.843607	17.686583	15.325275	14.369399	10.019139	21.579961	10.735111
ENSG00000258017.1	AC011603.2	-1.47137276668439	0.544417897974414	0.00687884789800336	0.10347543540188	135.364395	61.00064602	22.6330519886	302.881327	116.955275	31.36229	188.806018	210.1295826	232.44424	405.619813	448.6065	363.6653	818.088
ENSG00000160570.13	DEDD2	-0.872343030453872	0.322862455329009	0.00689438766893668	0.103554787567875	19.291277	10.422467	18.982281	21.5234151	13.96466	17.989431	48.841824	19.623419	30.919993	43.716525	17.094004	44.424615	33.225864
ENSG00000163378.13	EOGT	1.61555088970316	0.597959251084703	0.00689705797420301	0.103554787567875	53.30132	219.43163	57.248492	8.610872	17.683498	12.617232	7.75685618	38.378178	22.036284	16.633073	28.613308	15.505875	7.08115900416439
ENSG00000109321.10	AREG	1.57948013967686	0.584648169007279	0.00690086258635789	0.103554787567875	16.180846	6.86823	9.0670946122	8.201261	35.820206	38.68526	7.524348	1.478531	9.50424	7.444321	0.438924	9.957956	7.045495
ENSG00000169991.10	IFFO2	1.28925983342882	0.477135267295645	0.0068906237776968	0.103554787567875	10.7011	11.187293	13.21941	3.6217	3.856398	30.82844	1.83458	9.672885	5.05167	7.577201	6.467667	4.06706	2.6911
ENSG00000276070.4	CCL4L2	-1.67871399969053	0.621435510248693	0.00690588957216976	0.103567416644449	7.473046	0.628489	16.239462	11.746884	2.170685	9.092668	5.688874	12.554389	108.96243	48.127185	8.936456	32.760161	27.420714
ENSG00000025772.7	TOMM34	-0.913436944670498	0.338193392560694	0.0069145727008969	0.103634828276011	13.1173	19.0927	9.1893	15.2891	17.6407	17.0542	24.5337	25.0788	39.2566	25.1323	12.9168	50.0123	52.0982
ENSG00000168280.16	KIF5C	1.2542506023032	0.46442310795217	0.00692012844474555	0.103655313780405	2.2896574	1.775724	3.0242172	0.807923	0.4690561	0.3597344	0.2392654	1.381105	0.7409853	0.6571661	0.41294	0.41180344	0.4991806
ENSG00000196593.9	ANKRD20A19P	-2.33124915616935	0.863421997998976	0.00693371197818596	0.10367051534756	0.0193592	0.0187046	0	0	0	0.0305214	0.106931	0	0.0556969	0.1345	0	0.8932399	0.046532
ENSG00000015413.9	DPEP1	-2.19418730616575	0.812623448922174	0.00693128086472922	0.10367051534756	0.482719	0.311891	0.216367	2.064484	0.101459	0.1897605	1.570941	0.2683526	502.862837	2.372086	1.582184	0.0604922	25.68117
ENSG00000175662.17	TOM1L2	0.871884739419805	0.322886517445166	0.00692806673929889	0.10367051534756	39.441689	33.782966	42.9973650426158	16.96742	16.9790819	38.9085872	11.568917	31.8362799	15.723695	13.4138481119792	27.6670894	11.2323373	16.3592194
ENSG00000183808.11	RBM12B	-0.957906366068706	0.35483169958195	0.00694212951585448	0.10367108923948	2.547748	1.806563	1.757084	2.1443630322076	1.267730391141	3.411	2.3609869	2.939538	3.597657	5.965751	2.946155	6.872679	8.438649
ENSG00000104408.9	EIF3E	0.652877238752857	0.241833030202732	0.00694015033474197	0.10367108923948	309.571625	382.6446252	302.801055	171.829702	236.596944	256.224501	100.431819	294.950063	146.2046502	181.9952458	240.8718189	179.705174	197.10139
ENSG00000113448.18	PDE4D	1.38170319397724	0.511917921131146	0.00695331854778582	0.103687509795121	21.8394685	33.979916849296	30.3923425	4.8856807	7.3701391707943	3.1655844	3.6630224	10.5167257	3.8327768	3.575527	12.152694	7.1650184	3.6519788
ENSG00000135899.17	SP110	-0.53833402890633	0.199475132847824	0.00695999004929062	0.103687509795121	21.81471802	13.199918	15.686235	14.31107675099	21.782936	15.455619	19.679178	21.1676180404579	28.138872	39.278878	21.0073563	30.671168143697	30.332448
ENSG00000237781.3	AL356356.1	1.53752240195032	0.569696481023701	0.00695806110763364	0.103687509795121	0.864229	4.49705	2.30353	0.589753	1.606	0.343392	0.340772	1.06695	0.832781	0.846156	0.491012	0.413351	0.0862125
ENSG00000251039.2	IGKV2D-40	-2.29153745607817	0.849069797417865	0.00695732677996256	0.103687509795121	0	0	0	3.90747	0.372508	1.15639	1.70275	0.20162	57.1816	2.81484	15.9906	5.46705	2.32195
ENSG00000140374.15	ETFA	0.530057927938975	0.19644647245335	0.00697090865502949	0.103787686322927	95.664026	89.830638	121.472792	87.206442	121.828643	105.290701	66.074777	108.826899	80.679578	82.262411	94.896826	76.809502	43.760695
ENSG00000274290.2	HIST1H2BE	-2.24823802849232	0.8334151189989	0.00698369242356435	0.103915495502766	0	0.034147	0.0279443	0.2634841	0	0.0273297	0.399857	0	0.163325	1.031469	0.0320806	1.304833	1.210564
ENSG00000115295.19	CLIP4	1.22585052050099	0.454515029968652	0.00699564146260807	0.10397874848185	35.108134	42.67261	31.0510466	6.825993	11.7432059	22.7573366	2.1635373	16.577259	5.9691839	9.918012	15.602549	19.876813618	8.2392996
ENSG00000178776.4	C5orf46	-2.48210733703592	0.920315427482028	0.00699634739229262	0.10397874848185	0	0	0	0	0	0.107256	0	0.133085	4.332701	0.46902	0.638978	0.129284	0
ENSG00000230099.2	TRBV5-4	-2.03304242407189	0.753905695820247	0.00700345320386784	0.104021878469213	0.291935	0	0	0.227632	0	0.465585	0.345271	0.721634	0.140942	2.16165	0.265525	1.96527	2.67486
ENSG00000188786.9	MTF1	0.686570367508035	0.25463708574503	0.00701207770361217	0.104087500165497	3.7635	3.81616	3.35964	2.24477	5.88953	6.02574	2.42664	3.39317	3.19763	3.00909	2.16045	3.82738	2.13576
ENSG00000198715.12	GLMP	-0.47114267638845	0.174797475799267	0.00703119518829652	0.104308707994243	54.328318	30.541157	39.203555	46.388959	54.327131	39.403935	42.86316	64.326831	68.991337	84.86759	77.681775	73.572171	61.3489993642
ENSG00000124196.5	GTSF1L	-2.50312191244333	0.929081774802886	0.00705601378135603	0.104614176764323	0	0	0	0	0	0	0	0.0780813	0.076126	1.03222	0	0.0753734	1.32774
ENSG00000255559.1	ZNF252P-AS1	-1.5756165059696	0.585022262010529	0.00707572669760959	0.104843627025359	0.198643	0.0959564	0.0167692	0.439164	0.0466234	0.156548	0.653109	0.211978	1.36789	0.316249	0.284316	0.750007	0.742808
ENSG00000225093.1	RPL3P7	-2.12761812070555	0.790041497729826	0.00708024928480939	0.104847856704134	0	0.0480169	0.0503477	0	0.0464464	0	0.391786	0.0489628	0.238515	0.0431591	0.135323	0.0942146	0.119201
ENSG00000137474.20	MYO7A	-1.25748661103893	0.466986563286084	0.00708614965629129	0.104866273084228	2.2963067	0.7566707	1.883829057366	2.5267744	4.1361142	2.0656322	4.6434025	2.0897867	3.1496964	10.3112548	3.2738577	8.4479359	12.182487
ENSG00000153922.10	CHD1	0.914403908472435	0.339600299788547	0.00708996867528443	0.104866273084228	36.733161	63.510956	34.464955	14.491336	57.125855	15.532517	12.597977	21.468982	24.516492	21.2707160792097	19.231754	30.743615	19.271763
ENSG00000092203.13	TOX4	0.706158111075174	0.262381669903868	0.00711657657758198	0.105196945885464	35.071774	49.903062	33.048106	15.679456	34.704492	26.47087	12.274677	29.935712	25.726653	16.735323	22.63343	32.230542	14.747435
ENSG00000233885.7	YEATS2-AS1	-0.830244296489295	0.308539463730691	0.00712626988581899	0.105214527639971	2.095889	0.439383	1.793493	0.951206	0.611075	1.1456632	1.557222	1.841399	3.161657	2.62164	2.051345	2.164856	2.342278
ENSG00000236499.2	LINC00896	-1.90488159454047	0.707854148735094	0.00712242951399221	0.105214527639971	0.156398	0.0251894	0.250716	0.866351	0.0244457	0.164485	1.58371	0.256836	1.02529	0.452825	1.907888	4.37961	0.292297
ENSG00000249992.1	TMEM158	-1.33954761503435	0.497943530673858	0.00714178344581033	0.105345789962279	1.46436	4.81798	1.48399	3.08733	6.16174	3.04882	2.90085	19.1284	17.8497	12.2339	3.933	18.9221	2.89419
ENSG00000280079.1	AC011447.7	-1.6476195032751	0.612481716825404	0.00714367490631252	0.105345789962279	0.662374	0.0349476	0.366441	1.06627	0.270945	0.685074	2.07428	0.32071	1.48529	4.60832	1.23155	4.69577	0.538699
ENSG00000145687.16	SSBP2	1.18974704857612	0.442321404458025	0.00714992435490659	0.105375150781515	56.037741	58.007411	61.19296077315	11.57249887063	24.3379166	38.806268	9.220079	43.8966885	14.8871450012536	15.6809178635	29.8065369963308	7.47608	10.6202659
ENSG00000198646.13	NCOA6	-0.609005103087586	0.22643199445574	0.00715437582208858	0.105377993879513	15.9035511	7.3360003	14.6455994	13.731838	11.3260607	9.5827148	16.468137	21.6241263	21.255894	13.509696	17.5910976	22.4717199	27.085375
ENSG00000138381.9	ASNSD1	0.809779044077572	0.301128246880628	0.00716342088848113	0.105448453233471	28.894916191	41.47511	24.028698536	12.728584	39.230154	17.99	8.724214	20.965247	25.25594	17.7874	18.59397	20.806613	9.3013295
ENSG00000144355.14	DLX1	1.82301887249378	0.678343581088411	0.00719984775329155	0.105921660318192	1.076967	0.4559234	0.843981	0.0462131	0.0832859	0.0709196	0.0233669	0.1969146	0.1299825	0.1950337	0.141878	0.0280084	0.0237166
ENSG00000188566.13	NDOR1	-0.787011789561503	0.292891453467317	0.00720877752469515	0.105990017735343	7.655007	3.645557	6.387788	9.439943	4.927461	9.696786	11.820018	9.994671	12.71065	13.81274	9.199437	20.09839	16.31533
ENSG00000155893.12	PXYLP1	-0.884227905118853	0.329105695688931	0.00721488471626696	0.106016818470324	4.5959785	5.9285654	6.801239	4.2033862	3.6289513	2.2762555	4.8439946	9.4756344	7.7580055	5.5451757	11.2398121	20.659183	7.673333774546
ENSG00000213822.6	CEACAM18	-2.44816116038425	0.911472509551674	0.00723259120425872	0.106077235761983	0	0	0	0	0	0.0311041	0.310746	0	0.529373	0.0342212	0	0.0746074	0.0945828
ENSG00000276900.1	AC023157.3	-1.5104727864153	0.562342652201484	0.00723052292348548	0.106077235761983	1.65035	0.617363	0.944029	3.59309	1.82223	1.99474	4.34769	2.72773	4.75002	24.7166	1.64373	4.73077	3.04878
ENSG00000176919.12	C8G	-1.62436453445987	0.604711370418188	0.0072273803239794	0.106077235761983	0.978142572	0.168822	0.750601	2.502893	0.762043	3.136872	9.327118943	3.77103336	0.874344	10.47135027	2.762582	8.78621753	2.822275471
ENSG00000179627.9	ZBTB42	0.797343045599516	0.296876152175936	0.00723614362360991	0.106077235761983	4.145062	3.056145	3.367616	4.036325	2.509008	5.372263	2.071	2.68133	2.0879	1.49102	4.103194	1.71238	2.02497
ENSG00000272205.1	AL451050.2	-1.27034988081609	0.473043009234357	0.00724246369648825	0.106107024375134	0.625327	0.201779	0.211631	0.894107	0.290637	0.662348	1.80824	0.514619	1.70695	1.63252	0.852628	1.29534	1.49739
ENSG00000099968.17	BCL2L13	0.682385108782392	0.254147804279406	0.00725312968206863	0.106163862288483	23.091712	27.153623	31.5826188	12.3227446419	25.093419	18.62651829	9.719564	22.10266372317	15.544791	10.28366	17.9838115	23.8249809	10.6301108
ENSG00000137976.7	DNASE2B	-1.57382991280934	0.586175939239235	0.00725492386865329	0.106163862288483	0.0540362	0.156769	0.0547928	0.16863	0.151549	0	0.213159	0.213146	0.207685	0.469695	0.392696	0.153883	0.691657
ENSG00000173039.18	RELA	0.694439323748039	0.258672155344705	0.00726098912233928	0.106189820231847	73.981083	112.684835	92.909899	32.2561930557854	74.714547	45.614918	33.835553	57.4598960015837	54.134473	58.797401	49.833454	51.753203	33.181253
ENSG00000145390.11	USP53	1.09535006623306	0.408113848102946	0.00727617707198923	0.106349085437905	11.1379613	32.4110968242	19.101522	16.713239	22.241671	11.1383074	12.956396	18.8512561	8.954217	8.0368189	6.485217	3.7318154	5.440693866
ENSG00000150551.10	LYPD1	-1.28872788254473	0.480471092692574	0.00731359339837336	0.106472433902385	1.317078	1.252002	2.30347	0.37486	0.993279	0.80699	0.55356	5.584652	4.89221	3.233651	6.29907	2.390157	1.022594
ENSG00000128594.7	LRRC4	1.31813660708107	0.491341976580226	0.00730244764644136	0.106472433902385	1.84239	0.816316	1.5555872	0.421554	1.93838	2.998449	0.929129	1.02332	0.796836	0.396942	0.867852	0.300616	0.144318
ENSG00000101082.13	SLA2	-1.66832945956354	0.621989839499142	0.00731297671939322	0.106472433902385	1.445674	0.899928	0.220705	2.60678	0.78916	1.487892	1.401206	1.578178	2.14101	6.14708	1.22614	5.195786	18.04752
ENSG00000285576.1	AL138686.2	2.29233370726693	0.854283925192172	0.00728909769653099	0.106472433902385	0.434626	3.06696	2.910376	0.4348633	0.304726	0.407732	0	0.927475	0	0	0.098705	0	0
ENSG00000267523.1	AC008735.2	-0.984144722218799	0.366910065538353	0.00731286689383197	0.106472433902385	8.930509	5.87024	5.28983	5.615203	8.54028	5.628556	17.16141	6.13892	15.16549	18.07545	6.04563	13.43542	23.856981
ENSG00000119725.18	ZNF410	0.935607294681289	0.348825397622687	0.00731473581063063	0.106472433902385	41.641136302476	98.996921189	41.57924413428	22.95652	45.003449	25.4180478	19.6315968	30.125644	27.609471	21.102192887	24.5784652	46.872474143	13.734263
ENSG00000180867.11	PDIA3P1	-0.567866238271018	0.211666467940023	0.0073000966749685	0.106472433902385	3.419239	1.69445	3.082154	2.921647	1.802175	1.453813	3.219011	4.337498	3.490651	4.177204	3.455647	4.37631	3.936142
ENSG00000163866.8	SMIM12	0.692505634804088	0.258292492516002	0.00733825933988928	0.106540206289617	35.142559	56.0503572	39.615964	28.5667975	61.06548	32.771997	23.4159385	42.2404683	28.13419	27.9270552	32.0643689	33.446974	14.9049512
ENSG00000234851.4	RPL23AP42	0.43543748662908	0.162371886782352	0.00732426459089051	0.106540206289617	1078.28	1260.21	1001.65	757.722	804.509	1078.94	573.095	1040.71	902.737	723.249	676.359	846.338	903.748
ENSG00000157895.11	C12orf43	0.665023372732443	0.248053310288378	0.00734091944731447	0.106540206289617	11.396171	14.8028372	14.3618033	5.550513	10.897047	6.0950499	5.062614	10.535606	7.051346	5.9355313	7.0313681	8.86451922	5.884014
ENSG00000108244.16	KRT23	-2.40121730119037	0.895493141500704	0.00733045488697687	0.106540206289617	0	0.0769913	0	0.09320820065703	1.574796	1.26466	1.049139	0.0831351	57.95747	0.27185	0.37792202776	1.592758	9.4448759
ENSG00000196562.14	SULF2	-0.762120667296826	0.28426483229907	0.00733973832321017	0.106540206289617	79.364947	38.572115	38.2315126	18.13467482303	47.921263	34.968073	59.6446167	77.900589	150.5918295	59.556096	65.2217768	83.407553	61.4460013
ENSG00000204525.16	HLA-C	-0.978224322138605	0.364971977466552	0.00735622682307338	0.106699784722714	351.261284	181.004391	157.0692934	363.312068	410.632369	390.21854	513.836577	275.588313	692.044682	589.481969	635.13719	1412.016373	782.74474
ENSG00000068400.13	GRIPAP1	-0.494597094999887	0.18455079528139	0.00736210117650141	0.10670584147461	36.2132175	23.4225315456147	36.15254	29.742665572	21.03874663893	27.2946180001887	39.246038	33.2925513788601	48.067675	46.506078	34.860367	62.201717179086	47.033508882
ENSG00000279489.1	AL355377.2	1.81018327513623	0.67557526294618	0.00737389326819892	0.10670584147461	0.790048	1.72455	2.30996	0.151688	0.274676	0.0767189	0.025566	0.466546	0.231894	0.0979852	0.491989	0.0587246	0.181621
ENSG00000109265.14	KIAA1211	-1.34614774497452	0.50232991897307	0.00736643951372906	0.10670584147461	0.4835902	0.562310304	0.504849136	1.121033	0.1008213256	0.397292558	1.6265476	0.570754	3.4916701	1.0461294	0.9151786	3.189154	0.84647460161412
ENSG00000071564.14	TCF3	-0.862360611108902	0.321836078948016	0.00737316301089273	0.10670584147461	26.05125739887	16.8847413	21.8455485	50.9425441	27.4458437792	31.025266	32.502594	40.293575	67.449871	68.774055	46.574716	96.532616	76.304706
ENSG00000173678.14	SPDYE2B	-1.25507404085939	0.468443069965443	0.00737882465893594	0.106714796134056	0.487651	0.0916653	0.356125	0.153201	0.118777	0.359961	0.557869	0.36534	0.631735	1.078605	0.366526	0.590689	1.304989
ENSG00000115415.18	STAT1	-1.28260544807412	0.478801275416783	0.0073889925599857	0.106799428093952	86.636103	49.283879	40.532981	28.1869658	41.7609863928786	58.7183113	47.591703	46.42155	74.473615	148.393647	61.8997175704	425.051946	218.565001
ENSG00000169181.12	GSG1L	1.99122536465158	0.743446381070524	0.00739811825682136	0.106806555580539	0.4237545	0.0998879	0.0755573	0.2979363	0.048297	0.0688222	0.0407484	0.1018563	0	0.0897823	0.00967554	0	0
ENSG00000168612.4	ZSWIM1	-0.38404564667722	0.143377858668448	0.00739403313912856	0.106806555580539	6.33411	3.67689	4.86822	3.67092	3.66991	4.28168	4.8142	6.35788	7.1256	5.26031	5.88433	9.05308	5.57771
ENSG00000180644.7	PRF1	-1.62041270916892	0.605090865146082	0.00740707567238442	0.106873520415832	3.407885	3.165179	3.16075000062271	10.669401	5.892471	3.72683792	3.92370400054375	8.611836	6.76027	21.000693	4.10092	23.223154	70.83244
ENSG00000189114.6	BLOC1S3	-0.882072900724109	0.329449665898941	0.00741930626402012	0.106987606936584	5.691087	3.949157	3.72845	7.157314	6.601707	4.623861	12.573974	6.322299	9.553275	8.05837	6.865735	16.183018	15.821616
ENSG00000270427.1	NRBF2P5	-1.46142400821287	0.545887703618044	0.0074251083235971	0.10700891407537	0.341777	0.41341	0.0867107	0.399883	0.159188	0	0.673931	0.506008	0.904599	1.26349	0.465904	0.407349	1.29691
ENSG00000168398.6	BDKRB2	1.49818138481447	0.559764208255306	0.00744064807356201	0.107096965409877	10.651402	27.807222	7.337692	2.4033687	25.115784	9.516807	3.033811	9.695218	9.916051	5.14897	3.083912	4.072289	0.444999
ENSG00000236404.9	VLDLR-AS1	2.20700500557246	0.824650668145977	0.00744420208143014	0.107096965409877	0.5204904	0.2895354	1.903206	1.0740766	10.234046	0.8496486	0.0725759	0.7538227	0.1772137	0.0204919	1.397531	0	0.0135727
ENSG00000198610.10	AKR1C4	-2.34307244753882	0.875370715249619	0.0074359375183064	0.107096965409877	0	0.0799588	0	0.355711	0.0473806	0.4806	4.436472	0	10.330511	0.396273	0.0920348	1.105477	0.2686872
ENSG00000164941.13	INTS8	-0.760238306891202	0.284215422708711	0.00747590178278282	0.107181041415174	22.050724	15.9566072111	19.1144557	11.898425	12.130474	16.606652	32.2854176759	18.10641	22.505614	35.351257	24.3459478	24.983578	46.628613
ENSG00000224429.7	LINC00539	-1.55708295943755	0.58198305131191	0.00746227288638489	0.107181041415174	0.786669	0.255811	0.804739	0.849604	0.4188792	0.5069957	0.9138736	0.7924374	7.243028	0.97723	0.420489	1.19445	4.693239
ENSG00000279981.1	AC018445.4	1.23254417465229	0.460752878605009	0.00747146295211831	0.107181041415174	0.432621	0.34837	0.243522	0.0937663	0.383271	0.0947718	0.0568938	0.189441	0.161387	0.125252	0.0436503	0.0681359	0.154021
ENSG00000138092.10	CENPO	-0.842188921789994	0.314853397230758	0.00747603465276176	0.107181041415174	3.20877300334992	2.0662286	2.409245	4.031756187073	3.40133	5.221568	4.732062	4.5474791	10.844474	5.501222	4.535655	9.3943	9.18376
ENSG00000272100.1	AL513218.1	-1.30883994929627	0.489187330950416	0.00746091160686951	0.107181041415174	0.815221	0.753587	0.578355	2.05073	0.487101	2.16273	3.67964	1.43763	4.01437	4.40861	3.11735	1.71173	5.35321
ENSG00000161179.13	YDJC	-1.34387261346536	0.502350938640995	0.00746920514491558	0.107181041415174	5.4535531	4.196605	3.06403140558	13.545532	3.79718638957196	13.480669	14.918431	7.853958	26.0482110034	17.60174	11.93525	23.89252	53.39485
ENSG00000145743.15	FBXL17	0.581654366166787	0.217507846268392	0.00749130181030512	0.107187497448556	8.735226	7.085905	8.798083	4.5138189	6.6673286	6.1313211	4.2267471	7.2266641	5.1847327	3.658014639739	6.3884985	5.944961	2.8208317
ENSG00000279368.1	AL031123.3	-2.08955419607162	0.781415136357541	0.00749381170280875	0.107187497448556	0	0	0.0311109	0.191627	0	0.0484515	0.387571	0	0.854338	0.320028	0.22304	0.406555	0.270431
ENSG00000090889.11	KIF4A	-1.79914051216624	0.672688612267244	0.00748292240324086	0.107187497448556	0.278668	0.187266	0.269992	2.18386	0.250375	3.878638	3.55659	1.39618	7.008196	4.061493	2.53014	17.918185	7.1566
ENSG00000128908.16	INO80	0.524626592885942	0.19616425028944	0.00748574977381197	0.107187497448556	11.4875580242	18.57983534	12.18023359994	9.6972031	12.474967558477	11.28821011835	5.3403037740399	12.044591528804	12.0207864558	9.505022	10.72922313317	11.79260477978	7.389461451189
ENSG00000225697.12	SLC26A6	-1.12924772576799	0.422466630876006	0.00751792096801316	0.107342255307107	16.1952476342	5.97252378	9.0072528	29.8243568	5.685136	9.529542	40.771041	17.958497	43.565679	32.485832	19.1679220859008	33.435726	34.599862
ENSG00000137876.9	RSL24D1	0.756416902173275	0.282981219831319	0.0075169834930043	0.107342255307107	64.5158	104.540517	73.35798	39.4803905	75.489676	44.5616	23.4337074	66.7909	55.6660810097881	44.675974	52.1255	27.254114	34.5170019
ENSG00000178761.14	FAM219B	0.710356474909662	0.265820244132818	0.00753290122248451	0.107342255307107	45.200841	41.365622	45.874313	21.333911	39.560673	33.121638	12.0980587	43.776113	26.447971	24.925473	31.810222	16.0377	20.891399
ENSG00000123485.11	HJURP	-1.82277045167938	0.682193832486374	0.00754176026894209	0.107342255307107	1.0690612	0.4021972	0.436823	5.6767686	0.120779	5.402262	5.49138900035793	1.8309662	12.7316070219573	8.94819242	10.6738179	29.297568	13.8418828
ENSG00000160791.13	CCR5	-1.62589272293155	0.608213071609814	0.00751249838628306	0.107342255307107	2.87624	0.657328	0.95554	3.8129	1.74236	3.87498	1.19581	4.18876	4.4183	12.5955	2.8643	8.23097	30.6197
ENSG00000089682.16	RBM41	-1.02121003555199	0.382182937464004	0.00753905209390862	0.107342255307107	3.717841	2.868566	4.846445	3.957101	1.979658	4.731153	6.0640938	4.792729	7.206023	5.185734	4.615065	21.73989	10.519841
ENSG00000012660.13	ELOVL5	1.46885930503173	0.549755822786042	0.00754367274112178	0.107342255307107	70.442555	134.246508497	55.288889	14.463301	233.707702	20.539806	7.26509	47.452617	54.0468349	31.91615	29.690481	17.437916	39.0466339
ENSG00000239218.2	RPS20P22	1.88934889532689	0.7070840320418	0.00753941781252115	0.107342255307107	2.80061	4.58728	0.774673	0	5.16232	0.2503497	0.244474	0.941102	0.690706	0.234376	0.612431	0.6046513	0.2469106
ENSG00000145425.9	RPS3A	0.695478238939781	0.260221213760702	0.00752564352190936	0.107342255307107	1525.279722	2049.166126	1565.425628	1341.452964	1235.313038	1916.373784	508.2987114	1777.369101	1435.646643	972.485939	1347.742084	747.975217	939.154444
ENSG00000261366.1	MANEA-DT	-1.28850485025355	0.482310391398137	0.00755071762959849	0.10738075157725	0.340225	0.0939325	0.0984928	0.322351	0.0455908	0.344981	0.383509	0.215493	0.885856	0.61212	0.463426	0.620068	1.07066
ENSG00000150995.19	ITPR1	1.12291110014541	0.42036220589228	0.00755594018468516	0.107393302624948	51.0947814415107	44.3782817486591	31.7786706456747	10.6935438399868	20.7740772929601	10.3281663004831	8.2476502	30.8100458218863	10.5468932	12.7974446050285	14.7680332	6.303279380645	9.0893362503446
ENSG00000278156.1	TSC22D1-AS1	-1.35123805539519	0.506488749698292	0.00763374143737558	0.10818381508785	0.764139	0.1849436	0.2939494	1.49806	0.1379935	0.41574	1.325019	1.836898	3.49403	1.351877	1.487209	0.723432	1.816734
ENSG00000065320.8	NTN1	1.85799656502789	0.696284678389492	0.00762035156658303	0.10818381508785	53.649456	51.76986	57.52917	6.2543721	4.26785	10.2902	1.537	12.6703	4.22753	6.5657377	21.604375	1.28462	0.273048
ENSG00000106077.18	ABHD11	-1.29960378340132	0.487111531837692	0.00763088196899434	0.10818381508785	10.16165131808	8.563552	9.515399141	33.43238407	7.250091	24.717403	77.5208128	18.407144	83.2896060278021	24.48382811412	36.269737117041	46.250685	33.389060854
ENSG00000170965.9	PLAC1	-2.43168398310381	0.911536523521833	0.00763779046104158	0.10818381508785	0.0539780402	0	0	0	0	0	0.638791	0.0532289945	0	0.2345941486	0.1471026146	0	0.3266603
ENSG00000140853.15	NLRC5	-1.15381380920664	0.432421702143775	0.00762450837876575	0.10818381508785	35.32548751	18.01609203167	16.253291460478	48.6237589	32.4135598151	47.0796969087787	44.8679861633	43.402231	83.5981282	76.427143	33.92523095139	165.7831339	158.399496
ENSG00000176268.5	CYCSP34	-1.71778710791319	0.643818304911178	0.00762760880152605	0.10818381508785	1.71526	0	0.880574	1.00754	0	1.39439	2.39866	4.69832	10.5074	4.14371	1.17788	0.837417	3.43871
ENSG00000090975.12	PITPNM2	1.22354450446194	0.45870717886574	0.00764461007920271	0.108218464765372	13.360611	27.2292393	10.496511	2.98248739656	12.8738087	4.742311	1.766099	11.8905532	4.4928828115	4.3647152	4.2243155	4.9156737	5.913995544
ENSG00000103522.15	IL21R	-1.74728324191886	0.655233104662364	0.00766093635291427	0.108245575214864	0.79297	0.299837	0.2605137	1.5788793	0.397787	2.263714	0.4623879	1.241811	1.714742	7.7864	1.29119	5.381526	12.554502
ENSG00000163520.13	FBLN2	1.99573336988283	0.748444737973347	0.00766439380901028	0.108245575214864	26.4652	38.89095	16.06613	3.16103	242.2201855	4.1354	0.5209847	38.3033592	19.30044	7.49755	6.371902	3.976943	5.958006
ENSG00000167705.11	RILP	0.735024144900474	0.275627230032044	0.00765925643922826	0.108245575214864	29.75205	14.69268	21.431	19.181861	24.90181	9.054467	10.61183	16.763829	8.863751	11.32802	13.00861	20.440613	8.5873
ENSG00000175894.16	TSPEAR	-1.8019439620468	0.675708203073135	0.00765889197808568	0.108245575214864	0.2406094	0.056244	0.10832632	0.1355925	0.2838468	0.1263778	0.2901808	0.1448254	4.1243111	0.6887695	0.1763248	0.32796708	0.0887015
ENSG00000171246.5	NPTX1	2.21440374931888	0.830505704556641	0.00766839738741795	0.108245575214864	15.370723	16.4014719	25.4655213	0.19122	0.6848877	0.21714	0.128918	3.700386	0.2180125	0.265964	4.070082	0.115546	0.0491049
ENSG00000131398.13	KCNC3	-1.14028388423405	0.42769233754635	0.00767297424138839	0.108248430788572	0.950474	0.3486219	0.4787919	1.1985417	1.17985	1.889549370043	3.7181207667	1.018514	2.54931432	2.986828	2.28528382	2.621161	2.473908
ENSG00000266718.2	AC079336.5	-1.09691465511699	0.411494997880072	0.00768324165932118	0.108331518438691	0.1763384	0.1485308	0.291536	0.1997088	0.0620436	0.2154688	0.631397	0.375559	0.754977	0.4037492	0.200155	0.229054	0.4089049
ENSG00000228408.6	AL031056.1	-2.25285035829301	0.845241414956489	0.0076911980090628	0.108361567448376	0	0.0243674	0.0255504	0.0196753	0.0236507	0.0198885	0.176423	0	0	0.0438048	0.1943506	0.0799562	0.744127
ENSG00000204427.11	ABHD16A	-0.606652820789289	0.227619537054138	0.00769413109746601	0.108361567448376	60.664602	35.759972	55.746641	36.9966402	44.266623	46.180808	82.0304479	53.654887	94.894243	62.027469	51.1787365616	116.423618	78.044523
ENSG00000103540.16	CCP110	-0.422198755815502	0.158427202596842	0.00770023973852734	0.108385911450432	5.9337422	4.9749891	6.659720876	4.6826419	4.197504	6.120494	7.075793	6.6684722	8.8508582	9.728669	7.3319634	10.368093	5.9274107
ENSG00000284672.1	AC109583.3	1.87180677371504	0.702686275794593	0.00772664020345154	0.108695686091193	0.0929531	0.0603025	0.185935	0.0563752	0.0577656	0.0488963	0	0.0224556	0.0778169	0	0.0311701	0	0
ENSG00000258551.5	CRAT37	-2.3835485158043	0.895607087432366	0.00778216618322229	0.109287424102498	0.0259052	0	0	0.107288	0	0.0204331	0.2616356	0.0255246	2.13098	0.0450022	0.0470487	0	0.0207494
ENSG00000138161.13	CUZD1	-0.933329840648675	0.350741369744961	0.00779043025208106	0.109287424102498	0.9010571	0.2495818	0.632508	0.6780734	0.2203532	0.48356	0.7843916	0.905849	1.4857317	0.8669869	0.6211108	1.954743	1.331206
ENSG00000170185.9	USP38	0.670532398330591	0.251984671482163	0.00779078666869295	0.109287424102498	5.887948	10.59	5.926226	3.23087	6.271317	5.23457396	2.510537	4.3226655	5.092648	4.649949	4.326689	3.967573045	4.878042
ENSG00000198496.11	NBR2	-0.885358869686923	0.332650988930821	0.00777876013967457	0.109287424102498	6.220637	2.309729	4.229215	4.667256	2.957925	2.6126	9.440021	4.6588137	7.182443	7.064458	4.233786	14.68009	7.00025
ENSG00000109943.8	CRTAM	-1.60942284601573	0.604784106942385	0.00778736366228212	0.109287424102498	0.755726	0.084272	0.2945435	0.49996077	0.790246	0.5977942	0.183476	1.11704	0.7530269	2.80263	1.178501	1.475971	5.95619
ENSG00000127241.16	MASP1	1.63494779505475	0.614493472992722	0.00779915871041102	0.109342879483921	3.9865708	1.1698319	1.867017	1.193137	4.4105479	0.4234769	0.7513921	0.8670498	0.3415374	0.38851042	1.6577532	0.2836219938	0.0285727
ENSG00000123975.4	CKS2	-1.46942446447086	0.552325486497105	0.0078040456297827	0.109349438906553	13.378	11.777	5.06486	26.4611	32.9456	61.6404	53.6101	13.8189	84.5569	89.5728	86.0276	130.081	161.502
ENSG00000169299.13	PGM2	1.0980362920245	0.412887800079205	0.00782785704925696	0.109621008875984	19.985792	30.193265	15.832138	5.535639	12.341755	51.000802	6.600244	16.345283	12.885931	11.710267	12.293207	13.278633	6.890881
ENSG00000268201.1	AC020915.2	-1.42121166993134	0.534586780615393	0.00784838111929092	0.109743088205692	0.717358	0.833986	1.89556	0.894983	0.796677	0.686285	7.35315	1.7022	3.04733	2.99937	1.04391	0.827571	3.31533
ENSG00000272720.1	AL022322.1	-1.41241875279377	0.531368258136492	0.00785874933523887	0.109743088205692	1.87415	0.35257	1.07418	3.41324	0.91585	1.95399	8.72369	1.88083	4.65694	5.99729	1.40672	9.94201	3.19726
ENSG00000264705.1	AC090337.1	-1.51319644018686	0.56918848897934	0.00784857321635881	0.109743088205692	0.0536349	0.0259157	0.0271739	0.0627734	0.150888	0.105773	0.105801	0.105697	0.334474	0.372705	0.0730593	0.354934	0.472544
ENSG00000106780.8	MEGF9	0.708974128704061	0.266688699086942	0.00785048794059898	0.109743088205692	10.1042	9.5926	8.1051	3.24125	6.89696	6.98987	2.68598	6.2496	4.88941	4.40058	4.24261	9.12935	3.62032
ENSG00000083093.9	PALB2	-0.620986348185467	0.233607143426986	0.00785474436474223	0.109743088205692	4.80162846368	4.26337	5.083376716	5.55763686	5.467014	5.67222049861	9.212967	6.1411817	9.113787009	6.5723213	7.7074788	14.13722	8.3565557
ENSG00000100650.15	SRSF5	0.652157541415304	0.245368615260884	0.00786365427799362	0.10974964755158	447.664855	579.545205	533.442096	223.475479	345.85608	307.875602373	168.575067	413.118848	242.441399	257.873702	239.252850713069	433.620217	230.299202
ENSG00000215493.3	AC007731.2	-1.39373155396809	0.524494600882804	0.0078772854361455	0.109862241314277	0.668734	0.16231	0.0677738	0.104882	0.0626632	0.316706	0.211059	0.757915	0.609732	0.755264	0.334032	1.01253	1.23157
ENSG00000168575.9	SLC20A2	0.981481606355798	0.369374781398391	0.00788060126622921	0.109862241314277	40.4545602	79.2331176	28.189436	13.0166835	25.7111269	22.5406865	15.190643	29.8439408	13.8958701	21.1892909	21.2147097	18.900605	10.980327
ENSG00000196683.10	TOMM7	0.906748135505036	0.341274603137713	0.00788521109165466	0.109864610621055	633.277762	780.113159	716.900781	248.4808	476.601143	338.009879	131.907549	551.14852	284.780451	251.452495	433.260764	365.318392	139.961122
ENSG00000196247.11	ZNF107	-1.19887533410757	0.451326854692627	0.00789950906483471	0.110001886217971	1.4408563	0.8530366	1.268444	1.81141830021959	0.795844000138159	1.5197041	1.12357700266246	1.2081064	2.61476300234429	3.756068	1.73736527703	5.825781	7.744888032418
ENSG00000171885.14	AQP4	2.0549504543513	0.773796774269654	0.00791505499001091	0.110156375549955	0.1426745	0.621895	0.180579	0.1113031	0.0279183	0.0312044	0.0409166	0.0390192	0.0379754	0.111798	0	0	0
ENSG00000100348.9	TXN2	0.402908892429123	0.151749473268389	0.00792866575816048	0.110283774134728	74.114202	56.065501	63.90455	64.425286	72.84241	83.66984	51.913722	69.925654	67.28491	56.360276	55.132202	64.0552	39.98555
ENSG00000211892.4	IGHG4	-2.10930822388692	0.794538920337391	0.00793654205284105	0.110314267903317	9.917579	0.7371885	1.502382	61.54275	5.3816859	110.87411	18.662718	13.820728	766.145168	271.944136	377.727059	74.9436734	353.10018
ENSG00000175787.16	ZNF169	-1.11686349247287	0.420724396960314	0.00793977414167744	0.110314267903317	3.253274	0.69345597	1.142695	4.163822	1.072429	2.129213	5.434355	3.529342	5.718309	3.251918	3.78745	9.394639	5.138965
ENSG00000123091.4	RNF11	1.07726593466456	0.40590896590533	0.00795533870035629	0.110468493905902	83.716398	85.94969	88.6025	19.10039	67.97673	53.8753	15.084547	75.859788	24.903847	25.53883	50.78221	27.4837	14.284556
ENSG00000134343.12	ANO3	2.14248316936523	0.807372022035894	0.00796262532342654	0.110468545696809	0.0312062	0.0226065	0.0395068	0.01344348	0.483889	0.1104945	0.02719001	0	0.0672922	0	0.0212489	0	0.0125075
ENSG00000260633.1	AC010207.1	1.64258987531196	0.619008812707415	0.00796427098497102	0.110468545696809	0.402967	0.222536	0.350009	0.0673746	1.32229	0.522317	0.113556	0.226904	0	0.325039	0.130695	0.190533	0.0461037
ENSG00000278887.2	AC106782.7	-1.82435703976146	0.687783915782858	0.00798946170065467	0.110693857661086	0.00211909	0.3094557	0.299412	0.503913	0	0.410615	2.17685	0.207411	0.3261812	2.729905	1.2945484	1.72159	0.55382
ENSG00000279228.2	AC133555.5	-1.82444106548001	0.687780896095691	0.00798629537171997	0.110693857661086	0.00212066	0.3094557	0.299412	0.504434	0	0.410615	2.17798	0.207411	0.3261822	2.731748	1.2947384	1.72231	0.554278
ENSG00000178764.7	ZHX2	0.811113362873931	0.305835821953894	0.00799880596062824	0.110699358778381	8.794237	16.0436	7.66335	4.15738	9.22026	5.03799	2.89547	7.61936	6.1744	5.78012	6.17823	5.08943	3.42346
ENSG00000220323.4	HIST2H2BD	-0.923386793872268	0.348157974188709	0.00799676507417933	0.110699358778381	6.001	2.96853	4.16441	2.08939	1.516318	1.65723	5.96525	3.39679	4.64151	9.28593	4.20017	7.63095	8.00814
ENSG00000150712.10	MTMR12	0.671090696557192	0.253187331243194	0.00803561189104993	0.111146571405271	19.5765944	23.499386	23.752602	9.930031	16.227186	11.7039985	10.726218	17.0829830471667	11.753068	11.3348648	14.503512	8.5196716	8.00143201
ENSG00000266980.1	AC087289.1	-1.13657196775836	0.428892930961701	0.00804886042350806	0.111267626357378	0.22093	0.28435	0.0738744	0.287148	0.0685205	0.288414	0.5196	0.718907	0.703435	0.380228	0.466639	0.634094	0.467888
ENSG00000172738.11	TMEM217	1.56273254730893	0.589782135978106	0.00805686005899816	0.11131602577326	2.106759	4.991698	0.4432981	0.177295	5.829703	2.363958	0.51382215	0.520302	0.711855	1.624087	1.25526	0.9572175	0.55768437
ENSG00000144840.9	RABL3	0.624574334506976	0.23574327630488	0.00806387809719242	0.111350816693653	10.408062	10.663465	11.254698	5.2794155	13.710511	10.472376	6.056622	8.252023	7.92142	6.9613754	7.23559	11.10903	3.959366
ENSG00000272800.1	AC021851.1	-0.845714734492283	0.319256988269805	0.00807281075123903	0.111381955526585	0.968603	0.385729	0.751125	0.533412	0.372732	0.630991	1.16873	0.842864	1.53316	0.841995	0.776401	1.73151	1.4584
ENSG00000162244.11	RPL29	0.435573717884074	0.164434952077725	0.00807513551079786	0.111381955526585	1385.672187	1587.932425	1320.646981	1330.79563	1312.277677	1774.180965	704.039582	1438.06403	1511.827048	1003.94395	1197.79036	1483.391192	1092.462158
ENSG00000264717.5	NPY4R2	-2.26433109243506	0.855094238754071	0.00809578883765265	0.111542480394051	0.0143097	0.0455358	0.0318309	0.854184	0.0268323	0.315079	1.0271	0	10.6659	1.734977	0.0712478	6.28485	0.176066
ENSG00000138639.17	ARHGAP24	1.38568912484076	0.523272355367367	0.00809402691166358	0.111542480394051	13.689531	39.8647303	14.2085496	10.648478	22.376937	4.8707482	6.4492586	12.15859	6.680204	6.360186	11.942156	3.105206	0.86533415
ENSG00000273100.1	AL596442.2	1.37608709654021	0.519754192653579	0.00810718865633804	0.11163738636677	1.61052	1.49547	0.392039	1.35686	3.42875	0.458918	0.965559	0.571904	0.185799	0.840133	0.409704	0.428675	0.360581
ENSG00000100664.10	EIF5	0.723339239542914	0.273268519259563	0.0081211577194191	0.111767546032828	91.577721	260.531138	116.707366	113.273526	115.944759	136.779658	71.589209	136.40774	99.2351026548	97.330382	92.612979	81.880769	74.90681
ENSG00000164619.9	BMPER	1.97836582170779	0.747571989431596	0.00813563510737218	0.111904552936034	17.2681871384607	5.0067814812801	9.45200803	1.21916036615	5.507717	0.483572600212493	0.376822	4.9812129658793	0.712448294696	0.25367999	2.06263351061311	0.0199791	0.1694284
ENSG00000255346.9	NOX5	1.73277953036556	0.6548921689615	0.00814737726029489	0.111941615938921	0.25058221	0.299092	0.37996560502815	0.262752	0.0782915	0.3184318	0.2436624	0.0556281	0.0370171	0.0441544	0.0530164279647	0.01822479	0
[truncated: 35,135 more rows]
