# Supplementary material for: High Expression of Interleukin-2 Receptor Subunit Gamma Reveals Poor Prognosis in Human Gastric Cancer
Source: J Oncol. 2021 Jan 21;2021:6670834. doi: 10.1155/2021/6670834 (PMC7843183; doi:10.1155/2021/6670834)
Supplement: Supplementary Materials — Table S1: characteristics of the patients diagnosed with gastric cancer. Table S2: information of raw sequencing reads and mapping. Figure S1: sequencing samples comparison based on the expression levels of transcripts per million (TPM). N, normal gastric tissues. T, tumor. F, female. M, male. Figure S2: cytokine-cytokine receptor interaction (CCRI) pathway map based on the DEGs between GC and adjacent non-GC gastric tissues. Figure S3: the regulation network of TF-DEG and miRNA-DEG.A. Figure S4: molecular docking results of resatorvid and IL2RG. A. The files named deg_N_T_tpm.txt, deg_NF_TF_tpm.txt, and deg_NM_TM_tpm.txt contain the DEGs and related statistical information. [file 6670834.f1.zip › 6670834.f1/deg_NF_TF_tpm.txt]

GeneID	symbol	log2FC	lfcSE	pvalue	padj	N-F-700699	N-F-696970	T-F-697023	T-F-700699
ENSG00000220842.6	RPL21P16	10.2622735124899	1.13613251675342	1.67582606726096e-19	3.51236385437225e-15	153.225	177.532	0	0
ENSG00000113389.15	NPR3	6.05928448998637	0.710889186122048	1.54764204663217e-17	1.62185148276819e-13	6.0865741	5.9090105	0.0766644	0.0849609
ENSG00000175084.11	DES	5.87594284743815	0.694514501016939	2.66223978420644e-17	1.85992945457276e-13	142.34188	185.2392	3.593269	1.827775
ENSG00000170689.9	HOXB9	-6.92031715075916	0.842696926086312	2.17340836576468e-16	1.13881164845155e-12	0.0396121	0.099848	16.2487	13.4772
ENSG00000134531.9	EMP1	5.18274168137232	0.65202469375566	1.88495198452663e-15	7.90134172873874e-12	1120.911308	844.527314	32.76311665	21.607366
ENSG00000104332.11	SFRP1	7.76395283081805	0.984863187676493	3.18895929417235e-15	1.11395663077597e-11	108.3394	16.8174	0.167827	0.175447
ENSG00000126878.12	AIF1L	4.88467859872941	0.655022363973138	8.83335987520972e-14	2.64483413749315e-10	21.986091	26.597247	0.938785	0.71277949469
ENSG00000180871.7	CXCR2	5.7855283861743	0.812196679769113	1.05365791899199e-12	2.76045204051914e-09	6.231866	13.388345	0.141705	0.150305
ENSG00000105464.3	GRIN2D	-5.16824840343407	0.735072064923037	2.05145074497592e-12	4.77737290710559e-09	0.241248	0.202249	16.2822	7.45054
ENSG00000180155.19	LYNX1	4.7514795555195	0.697303962685992	9.48740428256453e-12	1.9884650635827e-08	11.957284	11.802543	0.371303	0.483721
ENSG00000133392.17	MYH11	4.16891914634781	0.627074976799463	2.96701270647404e-11	5.65323811954448e-08	86.795094	90.2229387	5.5194209	4.6916694
ENSG00000143196.4	DPT	7.37486356971125	1.11312679383233	3.46407468262692e-11	6.05029510609814e-08	492.896	29.7833	0.787782	0.685099
ENSG00000133063.15	CHIT1	-5.62865090374036	0.854907852522316	4.58182111647586e-11	7.38695298309366e-08	0.3523699	0.1461247	17.7700792	21.1630604
ENSG00000127831.10	VIL1	-5.52054556163081	0.840134666505338	4.99702018170965e-11	7.44875577440968e-08	0.344276	1.1761828	62.79927	50.06468
ENSG00000101955.14	SRPX	6.81024000808701	1.03792685228595	5.33094787996304e-11	7.44875577440968e-08	172.638835	18.478241	0.539504	0.456798
ENSG00000034971.16	MYOC	7.56986372116502	1.15581764299737	5.77848912504769e-11	7.56945959824216e-08	18.16349	3.44405	0.0501407	0
ENSG00000112936.18	C7	7.1574827572141	1.09577451715251	6.49432084326268e-11	7.79806663582375e-08	313.943912	23.572279	0.50267913	0.63176428
ENSG00000147852.15	VLDLR	5.05372956466847	0.77424648367354	6.69713247029092e-11	7.79806663582375e-08	17.502871	8.493243	0.320851	0.3868616
ENSG00000162409.10	PRKAA2	6.17280391073985	0.952393460401237	9.09001032564809e-11	1.0027238232382e-07	0.7798960253175	1.23714458788	0.00521589184	0.0133119468
ENSG00000234155.1	LINC02535	-6.84921299552984	1.06054875698784	1.0597082776827e-10	1.11052128959758e-07	0	0.0342631	6.99904	3.15059
ENSG00000165072.9	MAMDC2	6.33910955489728	0.999410151071305	2.2555173366171e-10	2.14879035718899e-07	12.9725	2.73431	0.0802468	0.0471595
ENSG00000187134.13	AKR1C1	6.05893007431935	0.955170581014291	2.24900186748318e-10	2.14879035718899e-07	327.31945	57.581005	1.8132588	2.289408
ENSG00000181234.9	TMEM132C	8.45845253397398	1.34757044925834	3.45575356574796e-10	3.14909299932659e-07	24.9355	0.767188	0	0
ENSG00000125207.7	PIWIL1	-7.96927658715619	1.28141477804745	4.99940129023359e-10	4.36593548508358e-07	0.0127668	0.0214206	65.2398	1.034332
ENSG00000170373.8	CST1	-6.60436692740509	1.06729145766709	6.09441378742474e-10	5.10931274282541e-07	0.0835312	0.854098	183.341	50.3724
ENSG00000119147.9	C2orf40	5.92473828211706	0.963541566728757	7.80131941782689e-10	6.28876360300899e-07	22.578439	17.846021	0.461772	0.0681431
ENSG00000137077.7	CCL21	6.96035200310548	1.13852701483539	9.74870316732189e-10	7.56752109940369e-07	395.98522	100.825479	0.146774	1.53959
ENSG00000248144.5	ADH1C	4.34821255428139	0.712634081522278	1.05007810755225e-09	7.86020966292411e-07	17.670705	28.606159	1.154969	1.0975
ENSG00000124882.3	EREG	6.50641315447363	1.06792028428801	1.11090083597626e-09	8.02874849007805e-07	10.126208	29.58232	0.2590542	0.0182305
ENSG00000229859.9	PGA3	8.20457481001476	1.34989858115121	1.21751901388364e-09	8.50599367066243e-07	8.449071	497.7066119	0	0.106502
ENSG00000118729.11	CASQ2	6.24795696932182	1.02904267697421	1.26625618167211e-09	8.56111719731154e-07	7.16779	1.76161	0.0383706	0.0325497
ENSG00000124343.13	XG	4.97387517990557	0.82287855054562	1.49890116235872e-09	9.51983923087162e-07	4.850093	8.800811	0.1555233	0.2335866
ENSG00000144908.13	ALDH1L1	7.75298166931862	1.28194659351112	1.46819264479957e-09	9.51983923087162e-07	46.0171509	2.24422117	0	0.03148180193792
ENSG00000148053.15	NTRK2	6.49487960207123	1.07803240385061	1.69367451246243e-09	1.04405070902059e-06	21.835157472912	3.356221986379	0.0293988	0.11698853
ENSG00000107807.12	TLX1	-6.63546547320898	1.10672762163363	2.02770052907295e-09	1.14861014564432e-06	0	0.0731964	18.201272	4.590726
ENSG00000167772.11	ANGPTL4	7.16036126296386	1.19355911757804	1.98331494156384e-09	1.14861014564432e-06	198.055276	8.49007759766	0.14618743	0.364872
ENSG00000064300.8	NGFR	6.42104938206298	1.07005891393468	1.96528795116347e-09	1.14861014564432e-06	20.2712	4.381684	0.0294879	0.125187
ENSG00000071991.8	CDH19	7.09978383077181	1.1855952437085	2.11953527409786e-09	1.16903525815308e-06	2.205057	0.5335604	0	0.00656019
ENSG00000152580.8	IGSF10	7.15622129059639	1.19646390998933	2.2157775042062e-09	1.19078155668353e-06	21.639199	1.099671	0.0246396	0.0326211
ENSG00000229183.8	PGA4	8.09327996172644	1.35506402449518	2.33475967489785e-09	1.2233557006546e-06	5.690103	173.542927	0.03601328	0.0352744
ENSG00000272763.1	AC103702.2	-5.45260029061053	0.918453324699525	2.90780509591208e-09	1.48645578061515e-06	0.131827	0.222708	8.375556	16.835163
ENSG00000163145.12	C1QTNF7	4.63765957556914	0.786521651588272	3.7147965662905e-09	1.85377193411625e-06	2.202976	2.29546604	0.1070987117157	0.066124909356
ENSG00000114200.9	BCHE	5.85070500386951	0.996512748818009	4.32706024079954e-09	2.10908966481204e-06	5.683411	3.392577	0.0956601	0.0178617
ENSG00000018236.14	CNTN1	6.52695444381259	1.12813888053087	7.22561958711165e-09	3.41657913757445e-06	0.50834692498	2.231838	0.0089293384414	0.007590676536
ENSG00000135638.13	EMX1	-6.56928055985054	1.13595312856451	7.3355628222172e-09	3.41657913757445e-06	0.017471	0	2.928168	2.6784463
ENSG00000189337.16	KAZN	3.82432323329703	0.662000746735987	7.60818844869068e-09	3.46652221078496e-06	18.067963	13.3796527	1.1946879	1.0881494
ENSG00000153446.15	C16orf89	5.9020445250523	1.02289424832081	7.92969624320995e-09	3.5361383736476e-06	84.60895	18.939047	0.2545012	0.848476
ENSG00000183454.16	GRIN2A	6.1500866319577	1.06840500611733	8.59647216746477e-09	3.75361375328946e-06	0.4182937115217	0.233195	0.00332254	0.00282769
ENSG00000178726.6	THBD	5.04134825436907	0.878068484459492	9.38933019476091e-09	4.01614227657131e-06	152.477	42.2674	3.54164	1.628
ENSG00000224940.8	PRRT4	7.42764120686297	1.3012940874602	1.14386490796832e-08	4.7948529212216e-06	44.85852	0.8070854	0.029921	0.0253262
ENSG00000078549.14	ADCYAP1R1	7.67987593176781	1.35161747335669	1.33137044089476e-08	5.4714104060222e-06	5.7851155	0.3019159580453	0	0
ENSG00000196616.13	ADH1B	7.01409442805399	1.23671386280479	1.41504660035004e-08	5.6412853440388e-06	511.870913	25.194756	0.1621103	1.1045177
ENSG00000276409.4	CCL14	6.46641586621057	1.14107127674383	1.45345392708667e-08	5.6412853440388e-06	287.54168	29.31424	0.30139	1.366647
ENSG00000095713.13	CRTAC1	5.97530130665756	1.05383981973018	1.42774167178126e-08	5.6412853440388e-06	3.060635	2.767099	0	0.0406819
ENSG00000232079.6	LINC01697	7.56967245260319	1.33680924751061	1.49189824555057e-08	5.68521733245354e-06	30.180926	2.5820588	0	0
ENSG00000154330.12	PGM5	4.35894398678549	0.771874775021817	1.63066400313693e-08	6.10305122174052e-06	20.7178	11.3095395	0.5764725	0.8673
ENSG00000175785.12	PRIMA1	6.36552759539145	1.12814190439167	1.67609844063002e-08	6.16304337143237e-06	2.5809409	3.1536530061377	0.0542218	0
ENSG00000285508.1	AL034430.1	7.17989286459662	1.27692180599064	1.87872456001652e-08	6.78899794023901e-06	5.83915	5.55203	0	0
ENSG00000111404.6	RERGL	6.55593412586141	1.16687652464685	1.92776848234805e-08	6.8481524782259e-06	8.610342	3.585297	0	0.0519766
ENSG00000166402.8	TUB	5.04366633885443	0.902387727220066	2.28058638151558e-08	7.83587048691558e-06	5.04181	1.3730126	0.0837879	0.0777227
ENSG00000255398.2	HCAR3	4.46132311142854	0.797860764988144	2.24978763715385e-08	7.83587048691558e-06	10.1263	7.21352	0.245754	0.460491
ENSG00000149596.6	JPH2	4.78241761757348	0.859005458609899	2.58584562265028e-08	8.7414094201818e-06	1.8213151	1.867194	0.092999	0.0263447
ENSG00000159184.7	HOXB13	-6.85413241749857	1.23366004173515	2.76132935623201e-08	9.18646063131216e-06	0	0.012122	0.929139	5.31302
ENSG00000135046.13	ANXA1	4.67759286952453	0.84358424339534	2.94117039669541e-08	9.63187349130298e-06	1972.76949	5618.9632	193.382486	81.863094
ENSG00000157152.16	SYN2	7.32124202881657	1.33163781750932	3.84290909767053e-08	1.23714935816134e-05	5.892202	0.7537708	0	0
ENSG00000198848.12	CES1	5.75985401174062	1.04810148018942	3.8957897628059e-08	1.23714935816134e-05	209.244074	23.289656	1.047437	1.67483
ENSG00000236404.9	VLDLR-AS1	7.05596253739713	1.28686677496864	4.18040714046038e-08	1.307718705327e-05	10.234046	0.8496486	0	0.0135727
ENSG00000198576.3	ARC	7.51937190283605	1.37328531011877	4.36370933411705e-08	1.3449850578494e-05	154.02583	0.423487	0.0345343	0.0293069
ENSG00000134121.9	CHL1	4.14491114883909	0.760093992814693	4.94836105713866e-08	1.50308259995028e-05	9.223312	5.16037	0.316691	0.4496915
ENSG00000256500.5	AL139300.1	6.57006157736271	1.20722126380297	5.25966819336423e-08	1.5748197952103e-05	7.35419	1.07657	0.0351123	0
ENSG00000124635.8	HIST1H2BJ	-4.60834918234125	0.852851414060722	6.53672469685254e-08	1.92962271720186e-05	0.502647	0.964074	42.76101	16.77845
ENSG00000173641.17	HSPB7	6.82676179731441	1.26527630068632	6.83439679162527e-08	1.98947392160658e-05	198.55435	3.3660617	0.4245356	0.12527
ENSG00000177098.8	SCN4B	5.09778470773314	0.947892542798187	7.53096047431409e-08	2.16221096686505e-05	11.0806887	2.65552200029074	0.113223	0.1895782
ENSG00000162444.11	RBP7	5.47592166056744	1.01928966768895	7.77421101492368e-08	2.17252918215714e-05	89.342279	21.550599	0.330951	1.235406
ENSG00000164220.6	F2RL2	-4.16250761108667	0.774484635589039	7.67735103101639e-08	2.17252918215714e-05	0.233823	0.539652	11.537278	8.3753572
ENSG00000163273.3	NPPC	7.08496554215243	1.32168818834703	8.29724600251859e-08	2.28818393377352e-05	2.31731	10.09965	0	0
ENSG00000074410.13	CA12	6.36611500313941	1.19185016274471	9.2245775362799e-08	2.44994940731454e-05	2.4385301	67.171454	0.282343614	0.10541161
ENSG00000109846.7	CRYAB	6.08664011124791	1.13948368733659	9.21413481695216e-08	2.44994940731454e-05	1048.568106	51.123859478512	3.9122015	4.4879608
ENSG00000143171.12	RXRG	6.7951711983957	1.27222356582243	9.23450561466905e-08	2.44994940731454e-05	9.460833	0.8619	0	0.0218638
ENSG00000152137.6	HSPB8	4.74043821882209	0.891955088717518	1.0685653271593e-07	2.79950758649146e-05	115.838799	28.1661	2.06852	2.45401
ENSG00000138722.9	MMRN1	6.04374240238784	1.13844132310551	1.10357257558476e-07	2.85552810020754e-05	29.595881	5.142068	0.0312709	0.228154
ENSG00000169248.12	CXCL11	-3.95781702320842	0.746254622425	1.13556797853057e-07	2.86751436891834e-05	1.37286	2.70901	56.168	33.6539
ENSG00000128510.11	CPA4	5.11148207473957	0.963678962695315	1.13209310984341e-07	2.86751436891834e-05	1.81589362947	2.89171591625	0.0362743	0.0639629
ENSG00000236081.1	ELFN1-AS1	-6.08186464207731	1.14862543910283	1.19077129647189e-07	2.97111614318504e-05	0.106718	0	9.4689	9.81695
ENSG00000174827.13	PDZK1	-4.6550048486947	0.881449146156075	1.28423488200814e-07	3.12979987116378e-05	0.184016	0.2661362	5.293	11.490253
ENSG00000163431.12	LMOD1	3.63597746668412	0.688246449471273	1.27114157732984e-07	3.12979987116378e-05	18.4795	16.1741	1.211861	1.592156
ENSG00000108823.15	SGCA	5.10840910791848	0.967852906417908	1.30541501689608e-07	3.14484980909482e-05	12.165274	4.317327	0.1528578	0.161704
ENSG00000154856.12	APCDD1	3.40614483006633	0.646810102787151	1.39378030083259e-07	3.28227430619667e-05	23.806729	28.04493	3.0744083	2.131002
ENSG00000149451.17	ADAM33	5.04039181399526	0.957126074271183	1.39296767153538e-07	3.28227430619667e-05	57.27693	9.596720635	0.875882777565	0.715330832
ENSG00000186564.5	FOXD2	-4.41089835556428	0.84103180754777	1.56598576189483e-07	3.64683284261707e-05	0.0633008	0.185774	3.89796	4.26659
ENSG00000139144.9	PIK3C2G	7.12651440853353	1.36248179708362	1.6901635794068e-07	3.85044983269425e-05	0.316580000219732	4.533811807437	0	0
ENSG00000102287.18	GABRE	4.39507026978894	0.840250623761402	1.6890053883609e-07	3.85044983269425e-05	99.093347	39.825391	2.0442715553841	3.7502032
ENSG00000134363.11	FST	6.13051822508232	1.17301433333453	1.72940936514238e-07	3.89749364344292e-05	146.46275	5.791453	0.7460278121	0.347232
ENSG00000115361.7	ACADL	6.73987459171416	1.29178488934435	1.81364126123954e-07	4.00127444150732e-05	7.6254392	0.4899632	0	0.0171839
ENSG00000108342.12	CSF3	6.53276013655436	1.25165540702887	1.79604461308519e-07	4.00127444150732e-05	121.062766	2.6893914706011	0.3423726	0.110892
ENSG00000116194.12	ANGPTL1	5.29344293447618	1.01513641552305	1.84299898115035e-07	4.0236891297844e-05	18.04144	2.969627	0.1447649	0.2119835
ENSG00000145777.14	TSLP	4.48851234473346	0.862041020777712	1.92080366870615e-07	4.12653665025276e-05	2.231532	4.280501	0.107376	0.14567
ENSG00000163017.13	ACTG2	3.86326300629987	0.742078094693437	1.92948419163496e-07	4.12653665025276e-05	65.140211	132.510702	6.4354014	6.926169
ENSG00000170323.8	FABP4	7.36804027392288	1.41685303637922	1.98982658585526e-07	4.21260357706468e-05	4361.10671	5.1286995	0.128986	0.386824
ENSG00000263934.4	SNORD3A	-4.25819653040663	0.820319624099444	2.09280839432528e-07	4.38631711366636e-05	23.1028600227611	15.105570152125	327.873210048507	700.82472
ENSG00000163710.8	PCOLCE2	7.06901214635019	1.36433194433615	2.20345595532374e-07	4.57249835323072e-05	275.402007	0.9644249	0.124573	0.1400799
ENSG00000145423.4	SFRP2	5.52314717830968	1.07295798844807	2.63855249005612e-07	5.42170800383197e-05	542.671	43.6493	5.23907	3.09792
ENSG00000267601.1	AC022966.1	-6.85464887799083	1.33334637731863	2.73372637217264e-07	5.56273505188024e-05	0	0	13.2536	52.0428
ENSG00000150625.16	GPM6A	6.89138358912198	1.3428378433601	2.86747832257688e-07	5.77879597720084e-05	3.123974	0.51307	0	0
ENSG00000174899.10	PQLC2L	6.76245319055524	1.32087546315572	3.06062516471724e-07	6.10929931688654e-05	5.879079	2.30311134432	0	0
ENSG00000166025.17	AMOTL1	3.42162217526679	0.670204230973837	3.30195827618577e-07	6.52884372741298e-05	13.23577	11.926255	1.07825	1.3269157
ENSG00000163464.7	CXCR1	5.20663484445827	1.02178534988496	3.47592809942392e-07	6.80859598465662e-05	4.63704	1.12574	0.0622502	0.0351931
ENSG00000169083.16	AR	4.6120284219876	0.906428859425573	3.61610308892289e-07	7.01758376303101e-05	2.649648251271	0.8531285	0.0897891	0.0361867
ENSG00000188783.5	PRELP	5.63006769669965	1.10769441722756	3.72126130550941e-07	7.15540511029098e-05	81.2005	5.11604	0.486921	0.537417
ENSG00000106384.11	MOGAT3	-5.63415937439703	1.10929655217556	3.79350777054335e-07	7.22801176025619e-05	0.0243952	0.266733	7.722674	23.733359
ENSG00000138755.5	CXCL9	-4.56535979535802	0.899709881635702	3.89011565986728e-07	7.345309379744e-05	2.80393	9.99816	168.149	299.879
ENSG00000108018.15	SORCS1	6.09967626380978	1.20469921793338	4.12199391209231e-07	7.44766124168472e-05	0.2720117190425	0.793613000106234	0	0.00619703
ENSG00000144891.17	AGTR1	7.02718190237958	1.38745343082919	4.08817327775493e-07	7.44766124168472e-05	10.544375	0.3813935	0	0
ENSG00000266964.5	FXYD1	5.18503943729159	1.02328244749124	4.03994778919176e-07	7.44766124168472e-05	190.751331	23.604282	2.22728	1.95522
ENSG00000068615.18	REEP1	4.12555604151759	0.813763785791308	3.983975173748e-07	7.44766124168472e-05	1.940929	1.490167	0.095127628	0.0881071
ENSG00000156298.12	TSPAN7	4.54130590606407	0.896606664611947	4.08416730422831e-07	7.44766124168472e-05	53.486785	16.38982	0.877458	1.617159
ENSG00000197632.8	SERPINB2	6.53794804587499	1.29545201862322	4.49160911334767e-07	8.04612268432938e-05	29.807818	127.840784	0.527167	0
ENSG00000130176.7	CNN1	4.02134277880185	0.797119818150995	4.53898543276547e-07	8.06208438011284e-05	41.686941	50.85917	1.634905	3.591794
ENSG00000124440.15	HIF3A	3.89867490396099	0.774363654856575	4.78642252249563e-07	8.43013694529293e-05	4.646674	8.6065693	0.5593235	0.34907727
ENSG00000106714.17	CNTNAP3	4.91365214424878	0.977029734888588	4.92598271722077e-07	8.60363931418585e-05	0.8766073	2.8948079	0.073536400110193	0.0248451
ENSG00000176194.17	CIDEA	7.10440454328724	1.41667604495401	5.30774510507433e-07	9.1938041039052e-05	73.267151	0.761086	0	0
ENSG00000132561.13	MATN2	4.08595253021023	0.817825530211957	5.84959950913496e-07	0.000100493242714721	54.26373037	18.642153142	2.5393029	1.561017161
ENSG00000244649.4	LINC02086	-6.57746612456345	1.31813645422603	6.03875410069376e-07	0.000102899387964586	0.114205	0.0209639	1.151975	58.31087
ENSG00000168490.13	PHYHIP	3.87584980539494	0.778381941740783	6.3792382501999e-07	0.000107824560069306	6.5032112	4.7337415	0.528539	0.2448748
ENSG00000153002.11	CPB1	6.85255953574616	1.37695230848853	6.47063197213886e-07	0.000108494380403247	19.534243850934	1.23069	0	0
ENSG00000145283.7	SLC10A6	4.36357241274922	0.880046028128417	7.10959828044783e-07	0.000117330764062918	2.71103	3.71866	0.182772	0.0926974
ENSG00000151892.14	GFRA1	5.03147676599812	1.01471253595527	7.10306556599416e-07	0.000117330764062918	9.745975	1.25244184869	0.1222700370338	0.125214508098
ENSG00000134962.6	KLB	6.21154165864684	1.25354328397862	7.2260677401674e-07	0.000118321213879819	9.79536	0.215317	0.024166	0.0205468
ENSG00000157551.18	KCNJ15	4.32098695590219	0.873897089594114	7.633828777155e-07	0.000124029005690226	7.534376	6.545414	0.15083887	0.4680811
ENSG00000176083.17	ZNF683	-4.433891768109	0.897672809039819	7.83961389900195e-07	0.000126378846573325	0.3186512	0.478355	7.106036	18.807718
ENSG00000133317.14	LGALS12	6.80089766540466	1.37730073380091	7.89905477413312e-07	0.000126378846573325	82.091728	0.2916354	0.0777325	0.0328377
ENSG00000162706.12	CADM3	5.84329787223669	1.18430454543627	8.05836133885421e-07	0.000127950905531095	43.325546	3.40099	0.0510308	0.315675
ENSG00000168077.13	SCARA3	3.91343008890706	0.793998341493538	8.27516484150447e-07	0.00012943222381574	27.44611	12.53795	1.820067	0.8145017
ENSG00000182752.9	PAPPA	4.52135320969309	0.917177897288863	8.23829554326487e-07	0.00012943222381574	5.85685	1.44669	0.191396	0.0852531
ENSG00000167434.9	CA4	6.73370240605152	1.37269394387384	9.32061538135359e-07	0.0001447042798354	12.157994	1.079499	0	0
ENSG00000086570.12	FAT2	5.74041256371839	1.17420458268626	1.0146952908058e-06	0.000155233566423349	1.506255	33.87997	0.27111	0.0891124
ENSG00000100842.12	EFS	4.01133173186135	0.820498514363647	1.01403154505484e-06	0.000155233566423349	9.6586	28.32448	1.271925	0.967636
ENSG00000096006.11	CRISP3	6.91884274507152	1.41568882583361	1.02247786152255e-06	0.000155290677533704	0.191408	53.267134	0	0.0204338
ENSG00000123560.13	PLP1	5.37758004719322	1.1015614061636	1.05132700413318e-06	0.000158523472515305	7.02213	2.059784	0.1345545	0.0149358
ENSG00000250208.6	FZD10-DT	4.67529194515379	0.959439590445489	1.09949398421156e-06	0.00016460210296493	4.96277	3.129931	0.25275356	0.04779384
ENSG00000169495.4	HTRA4	-4.32416083398699	0.888374141314848	1.13019024147812e-06	0.000167997569298865	0.149221	0.146437	2.90816	5.99011
ENSG00000175183.9	CSRP2	3.58330049782179	0.736576152580497	1.1456880385159e-06	0.000169101940839822	40.466939	72.992064	4.3166151	5.0749521
ENSG00000122756.14	CNTFR	6.46247868848257	1.33114101131374	1.20483042271852e-06	0.000176587698110191	53.93981	0.4967815	0.083383568382	0.0557116
ENSG00000236333.3	TRHDE-AS1	6.77479411674695	1.39722585865802	1.24244017133226e-06	0.000180835441326061	4.5928951	0.1661293	0	0
ENSG00000237424.1	FOXD2-AS1	-3.84223402113586	0.793070328679985	1.26765931696283e-06	0.000183233597408441	0.469708	0.446193	6.2299	11.6128
ENSG00000074211.13	PPP2R2C	6.44827440424927	1.33399724225593	1.33951904862752e-06	0.000192294381782084	0.12278607	11.2204416	0.024364	0.0103488
ENSG00000022267.16	FHL1	5.54959320009669	1.14887467705697	1.36217962513108e-06	0.000192442897167576	1106.4784750053	47.3744360225269	7.1764632	6.530146648172
ENSG00000184702.19	SEPT5	3.96394618838497	0.820761340187524	1.3680992260112e-06	0.000192442897167576	15.846373	33.834416	2.270053	0.880864
ENSG00000166106.3	ADAMTS15	6.29418668270476	1.30286487644451	1.35824670051595e-06	0.000192442897167576	83.7986	0.903988	0.0779232	0.220816
ENSG00000115457.9	IGFBP2	4.18930658521835	0.869891660172552	1.46541832959053e-06	0.000203767072683172	35.7179889	132.170256	4.0752	4.1986992
ENSG00000275713.2	HIST1H2BH	-4.72783251507267	0.981787265256878	1.46804847440999e-06	0.000203767072683172	0.0760099	0.511539	14.3813	12.7031
ENSG00000171303.6	KCNK3	6.06561374747699	1.2612345654221	1.5148477134667e-06	0.000207514334814043	4.76865	0.444766	0.02706333	0
ENSG00000205363.5	INSYN1	3.74799791470915	0.779238504541442	1.51065329690879e-06	0.000207514334814043	9.75478	7.417008	0.631668	0.6377597
ENSG00000133401.15	PDZD2	3.72784794373184	0.77743659081304	1.62633615102697e-06	0.000219912125092738	13.246441	5.550513	0.66792	0.7099128
ENSG00000248485.1	PCP4L1	6.18688621005125	1.29003824712563	1.61951208213811e-06	0.000219912125092738	1.19163	20.1069	0	0.0657291
ENSG00000136546.14	SCN7A	3.75897493711857	0.788116281799066	1.84620555506962e-06	0.000248042450184001	0.824868	1.307292377	0.0949338	0.0576694
ENSG00000172260.14	NEGR1	4.99693173038802	1.04795894678044	1.85831786585571e-06	0.000248079516881973	18.0501	1.820061	0.2732012	0.1723134
ENSG00000133800.8	LYVE1	5.39907450287806	1.13273252418578	1.87531798978774e-06	0.000248764492075704	82.9965	4.48772	0.779375	0.471131
ENSG00000111405.8	ENDOU	6.57658884080371	1.38044719852075	1.89698183621205e-06	0.000250055611982191	0.641276	46.547871	0.066821	0
ENSG00000240990.10	HOXA11-AS	-6.36330643055278	1.33659552778803	1.92796726534033e-06	0.000250983018101043	0	0	2.355728	4.078857
ENSG00000115705.21	TPO	5.56408380849377	1.16871171462114	1.92760787886284e-06	0.000250983018101043	6.8227335	0.635053	0.0227995	0.0543216
ENSG00000165795.23	NDRG2	3.31501528012546	0.699478481779649	2.14492727487776e-06	0.000277503276260266	104.70672010375	95.227497	14.7314634209696	6.728918510321
ENSG00000179915.22	NRXN1	5.65883776463929	1.19445909875155	2.16292427809523e-06	0.00027811490763557	0.7450193	0.58564087	0	0.0118627
ENSG00000128591.15	FLNC	5.38087316812038	1.13897174064968	2.30880434786456e-06	0.000295062380042033	63.90235	4.283380225233	0.25175100027628	0.65438
ENSG00000167701.13	GPT	3.37498358259508	0.717361701675362	2.54218708289414e-06	0.000322919388305323	11.523732	13.800815	1.701871	0.852652
ENSG00000004799.7	PDK4	3.93349720109031	0.836892308042981	2.60004206185409e-06	0.00032827880466506	48.936838	14.626507	2.145441	1.75487
ENSG00000182782.7	HCAR2	4.48072779508292	0.953881438147035	2.6354126776951e-06	0.000330752181507854	38.1665	10.7201	0.479002	1.23951
ENSG00000105426.16	PTPRS	4.15055868291339	0.884425860597145	2.69304730286631e-06	0.000333985671128846	39.785514	11.422417	0.97443662768	1.5314
ENSG00000257767.2	AC002996.1	6.3434811081468	1.35137332494149	2.67783428414472e-06	0.000333985671128846	6.17157	2.15116	1.55437e-07	0
ENSG00000163220.10	S100A9	5.95154267928628	1.26886459489123	2.72608263761416e-06	0.000336093917657384	760.434	28913.2	173.289	21.876
ENSG00000125851.9	PCSK2	6.34060256692379	1.35226018298838	2.746876968204e-06	0.000336677160097004	0.962036	0.3247146	0	0
ENSG00000181856.14	SLC2A4	5.3754637284524	1.14747489444543	2.80503805309951e-06	0.000341806933458794	21.3344455	1.224774	0.214823	0.0997997
ENSG00000163661.3	PTX3	6.45990506305585	1.38335209105543	3.01570073121998e-06	0.000364866036177515	144.706	0.319031	0.191193	0.0693937
ENSG00000253187.2	HOXA10-AS	-5.94263320544704	1.27282933073893	3.02908966529355e-06	0.000364866036177515	0	0.0427793	11.163001	1.24291
ENSG00000133636.10	NTS	6.04940595010838	1.29656484837704	3.07541243351926e-06	0.000368328966823601	70.571833	0.870412	0.1594467	0.133576
ENSG00000149575.5	SCN2B	5.63689718375686	1.20988836724555	3.1771440354319e-06	0.000378350919537597	0.545607	0.267333	0	0.00716046
ENSG00000149654.9	CDH22	6.26411072626856	1.34523951915671	3.21626907464317e-06	0.000380846234663537	0.4525546	0.743703	0	0
ENSG00000118094.11	TREH	4.28065191770798	0.919773843399465	3.25514808792553e-06	0.000381143289244867	3.402747	2.704944	0.2318251	0.0577416
ENSG00000130595.18	TNNT3	5.81447145180735	1.24909453182489	3.24060771975145e-06	0.000381143289244867	24.3064038	2.503371	0	0.1541935
ENSG00000168309.17	FAM107A	4.41926125385862	0.951411419819211	3.40154014906054e-06	0.000396071555467555	31.197976	6.813249	0.5013667	0.9176317
ENSG00000167588.12	GPD1	6.1913659361043	1.33338217614015	3.42797666637348e-06	0.000396944546687966	585.011344	2.913721	1.519861	0.6430683
ENSG00000004776.12	HSPB6	5.64703580038103	1.21721710792564	3.49590612131708e-06	0.000402586243937828	844.14574	22.5967	6.3096	2.14422
ENSG00000163629.12	PTPN13	4.07087310839581	0.877898975957006	3.53394238707204e-06	0.000404742614702967	3.9037698	15.242649	0.60651464411	0.4341662
ENSG00000115353.10	TACR1	5.30473210004125	1.14563622010154	3.6499363500057e-06	0.000413772761702466	3.16764	0.474123	0.00995917	0.0423217
ENSG00000129991.12	TNNI3	-4.94851077624114	1.06873546516682	3.65227162149703e-06	0.000413772761702466	0.059249	0.799486	28.934346	24.518218
ENSG00000157150.4	TIMP4	6.32306571690365	1.36670507029436	3.71890683402176e-06	0.000419056819001409	185.124	0.492478	0.229629	0.222002
ENSG00000165449.11	SLC16A9	5.78738453724284	1.25276781067638	3.84335086433109e-06	0.000430763586981366	0.232818	9.04379	0.0357544	0.0233746
ENSG00000144130.11	NT5DC4	-4.87578223570103	1.05600182716981	3.88933569802139e-06	0.000433598866461863	0.0300566	0.0535695	2.399873	1.808911
ENSG00000182585.9	EPGN	6.4080478252199	1.38860145458325	3.93569778686652e-06	0.000436445978385902	0.5320702	51.789681	0.0957395	0
ENSG00000141052.17	MYOCD	3.42876492978093	0.749614294565395	4.78410996992885e-06	0.000524974664187114	0.9640533	0.907567	0.0982546	0.0779868
ENSG00000167748.10	KLK1	-4.72399201434392	1.03266637696925	4.77226883871051e-06	0.000524974664187114	0.336988	3.179164	67.275256	102.630978
ENSG00000224958.5	PGM5-AS1	5.48889241000234	1.20216888467699	4.97534374482384e-06	0.000543115778894598	5.180591	5.933433	0	0.134314
ENSG00000112964.13	GHR	5.2606472614915	1.15313836762301	5.06623619105028e-06	0.0005501722504053	30.8943250001299	1.41237200349721	0.230356	0.244647
ENSG00000268916.6	CSAG3	-5.26890277228752	1.15767414074122	5.33197422413729e-06	0.000576045607029348	0.0397299768	0.202936	3.568096	23.57093
ENSG00000214860.4	EVPLL	6.14139509167305	1.35292463433089	5.64285672499678e-06	0.000600348396442678	0.219733	7.469301	0.0314234	0
ENSG00000018625.14	ATP1A2	5.51037188401497	1.21366515192535	5.61812689173396e-06	0.000600348396442678	32.2415124	2.9049176	0.397151	0.0286821
ENSG00000102349.17	KLF8	4.22558047226795	0.930846777704976	5.63873423632905e-06	0.000600348396442678	7.1965733	17.413822	0.2583541	0.8135869
ENSG00000108947.4	EFNB3	4.07644542684928	0.899101623572865	5.79018352173071e-06	0.000610759392183879	1.26465	1.88729	0.125582	0.0399775
ENSG00000213886.3	UBD	-4.66082454500416	1.02806518609767	5.79899418123918e-06	0.000610759392183879	7.33831	65.3087	1459.29	1845.32
ENSG00000108924.13	HLF	4.47076844008289	0.990466377972824	6.36758738717832e-06	0.000667291320239352	2.02241	12.114639	0.2050366	0.2900104
ENSG00000227051.6	C14orf132	3.28880156237666	0.729526544662075	6.54010529183788e-06	0.000681960531401145	2.04734	3.568186	0.295136	0.289218
ENSG00000159387.7	IRX6	5.99786058516091	1.33094230069579	6.59128918181696e-06	0.000683895197830206	3.46435	0.175859	0	0.0137533
ENSG00000105696.8	TMEM59L	5.67556129171705	1.26088576065249	6.75551769861088e-06	0.000697482243572342	3.3209	0.673887	0.0336677	0
ENSG00000168477.19	TNXB	5.01416790989956	1.11421171009983	6.78917428509337e-06	0.000697521097261137	303.80605	17.3722567	3.41913854	2.9334634
ENSG00000163815.5	CLEC3B	5.22551860444627	1.16160992806937	6.84300686376413e-06	0.000699622345646987	494.193156	19.3524	4.2208	3.60228
ENSG00000144057.15	ST6GAL2	5.0199847809281	1.11833953259452	7.1630827655831e-06	0.000728791513028428	0.2128521	1.4568521	0.014233	0.0181556
ENSG00000221866.9	PLXNA4	5.5410131204901	1.23504792406952	7.24108009418922e-06	0.000733168104802473	9.4325655	0.193792	0.0557303	0.0407294
ENSG00000132854.18	KANK4	5.37311109387203	1.19922784550316	7.44768961581129e-06	0.000746897145315238	5.4439262	0.4147711	0.0636962	0.0142645
ENSG00000138615.5	CILP	5.73253147310092	1.27944919189963	7.44794615062192e-06	0.000746897145315238	87.1073	1.05883	0.215586	0.388548
ENSG00000125780.11	TGM3	6.49443785846455	1.45062367144062	7.57003047197532e-06	0.00075552508886729	0.405562	507.1297	0.1555	0.0164879
ENSG00000151025.10	GPR158	-4.63473952733037	1.03581251219389	7.65915579992746e-06	0.000760797376353932	0.0419286	0.00863016	0.81956788699	1.4648829106
ENSG00000154451.14	GBP5	-4.0140610458516	0.897566050661993	7.74326247838599e-06	0.000765523765492886	4.192162	8.908197	78.59021	228.899198
ENSG00000134533.6	RERG	3.36174912699941	0.752259270381059	7.86337825743526e-06	0.00076885644218135	8.2037755	4.8470001	0.7919774287	0.503012
ENSG00000182836.9	PLCXD3	5.12619952109607	1.14725241730357	7.88656716988422e-06	0.00076885644218135	0.617965	0.274215000719668	0	0.0109808
ENSG00000131142.13	CCL25	-6.21885516140628	1.39179452033231	7.88702395481608e-06	0.00076885644218135	0.257883	0.164875	0.528174	247.089636
ENSG00000180914.10	OXTR	-3.74269703181897	0.840148441855682	8.39696878645817e-06	0.00081102335850404	0.056685	0.123602	1.652448	1.869671
ENSG00000128594.7	LRRC4	3.51838389659186	0.789747726802476	8.38645935538673e-06	0.00081102335850404	1.93838	2.998449	0.300616	0.144318
ENSG00000152661.8	GJA1	4.11777765740558	0.926080491803441	8.72978805787984e-06	0.000834979864195287	207.820150935922	54.96231400896	10.4261400147494	3.3159500645634
ENSG00000204544.5	MUC21	6.49967744075758	1.46236663337913	8.80435850885817e-06	0.000834979864195287	0.2634389	346.283	0	0.0173019
ENSG00000147889.17	CDKN2A	-3.99269443498487	0.897893848520255	8.71859894217728e-06	0.000834979864195287	1.5342754	4.7552207	50.403413	97.240883
ENSG00000184113.9	CLDN5	4.23618265360239	0.952901902564612	8.76631783537873e-06	0.000834979864195287	90.2213595	17.9661079	3.5047952	1.473246
ENSG00000099260.10	PALMD	4.60471821879372	1.03642934251542	8.87678442932886e-06	0.000838056418262628	137.463113133	14.116604	2.8396983	1.8610590028867
ENSG00000179344.16	HLA-DQB1	-2.78665993128916	0.627634780191727	8.9984517735729e-06	0.00084228822177997	62.587664	66.0909352925	597.677277	530.45288
ENSG00000134201.11	GSTM5	4.33940791386745	0.977376212664761	9.0019829991275e-06	0.00084228822177997	26.145183	4.646941	0.8195792	0.45669887
ENSG00000169302.15	STK32A	6.11795767288031	1.37964375661238	9.23087519299677e-06	0.00085229036638775	0.861618	0.190554	0	0
ENSG00000166819.11	PLIN1	6.39348154558516	1.44151818124989	9.19690455345305e-06	0.00085229036638775	900.4317	0.320502	0.330265	0.241587
ENSG00000166831.8	RBPMS2	4.5429295836585	1.02404750603895	9.15400158884041e-06	0.00085229036638775	28.2429	3.53729	0.55363	0.468533
ENSG00000173267.13	SNCG	5.16619182833413	1.16693615466497	9.5489961723702e-06	0.000873962492474704	381.6257	16.451672	4.616912	1.953865
ENSG00000167676.4	PLIN4	6.28900164560189	1.4204325370586	9.53201924299169e-06	0.000873962492474704	1181.91	1.448507	1.50152	0.209517
ENSG00000164070.11	HSPA4L	4.78985075655724	1.08286506017699	9.71989064960892e-06	0.000885735600544145	0.680238	7.8993813	0.0944043	0.11555685
ENSG00000122378.13	PRXL2A	3.25035223614454	0.735124032664573	9.8017246238647e-06	0.000889326174855326	178.549445	82.880853	15.668499	12.485641
ENSG00000186868.15	MAPT	4.07689172693416	0.922898089019033	9.98543655026462e-06	0.00090208950283188	2.75970846	4.4174577708138	0.336957213286803	0.0626367
ENSG00000285330.1	AC126283.2	6.00914103089211	1.36205969170302	1.025126721818e-05	0.00092213008423105	0.903093	0.641037	0.0037589	2.17758e-05
ENSG00000182195.7	LDOC1	3.4363012125355	0.779913589643695	1.05295756317563e-05	0.000939103726238214	26.27983	11.384748	1.77423	1.66888
ENSG00000109472.13	CPE	4.37490706197935	0.992834684362783	1.05063573592619e-05	0.000939103726238214	116.612	15.5945	2.56537	2.48338
ENSG00000198483.12	ANKRD35	3.96322653900615	0.899918825406736	1.06281640026817e-05	0.000943880039543241	3.31048	12.775108	0.590381	0.347989
ENSG00000161649.12	CD300LG	6.00447332422708	1.36589015732294	1.10256428055608e-05	0.00097504830194831	15.954132	0.3640607868	0.0644052	0
ENSG00000258545.5	RHOXF1-AS1	4.07730516946963	0.928421406494724	1.12491845935629e-05	0.000990637226455822	2.42833	1.25054	0.124889	0.0634903
ENSG00000139304.13	PTPRQ	5.08224455415549	1.15792575444128	1.13824058315136e-05	0.000998175078756038	0.38908800880456	0.1679931947	0.00594671916	0.00505827433
ENSG00000230316.6	FEZF1-AS1	-5.7568491333695	1.31453901577853	1.19024392867209e-05	0.00103943010420993	0.0192261	0	0.47318	4.350574
ENSG00000106809.10	OGN	4.94425907156496	1.13052925278882	1.22325083012617e-05	0.00105942620448819	83.813846	5.894272	0.524901	1.218314
ENSG00000146147.14	MLIP	4.56198530930263	1.04290708091084	1.21824430365502e-05	0.00105942620448819	2.450975	2.5120632	0.0573909	0.079746
ENSG00000171444.17	MCC	3.13061145984515	0.716084644967325	1.23200676623374e-05	0.00106261851084334	12.602039	7.3007648	1.0686129	1.2451973
ENSG00000107984.9	DKK1	5.53468636864561	1.26768759447818	1.26559685322002e-05	0.0010871165756819	7.89582	0.349215	0.0598042	0.0253103
ENSG00000160307.9	S100B	4.95620332306853	1.13547541435935	1.27197996172963e-05	0.00108813991909761	232.329071	12.801766	1.984307	2.7924834
ENSG00000186377.7	CYP4X1	4.59875876163849	1.05516201812463	1.31050448441945e-05	0.00111518639993435	2.25131	12.650661	0.396263	0.0933206
ENSG00000105668.7	UPK1A	5.05949070336709	1.16104052388829	1.31423751507125e-05	0.00111518639993435	1.27714	9.593269	0.0585266	0.117922
ENSG00000179388.8	EGR3	4.09077389435756	0.940125990560833	1.3533032241487e-05	0.0011429754087039	57.508498	10.668113	1.579886	1.804126
ENSG00000159339.13	PADI4	5.54748246105202	1.27511872066269	1.35789339552112e-05	0.0011429754087039	8.2702312	0.697164	0	0.0584277
ENSG00000169436.16	COL22A1	-4.28718407304819	0.987457399588125	1.41423426859864e-05	0.00118563744142235	0.0836741	0.522287	14.522198	6.1509004
ENSG00000115523.16	GNLY	-2.78091034953316	0.641505014665994	1.45774469110601e-05	0.00121724585581238	11.50943192	10.613019	99.208900239	94.014285
ENSG00000154529.14	CNTNAP3B	3.49977299078407	0.808989375527483	1.51769091493812e-05	0.00126227317008683	3.2911683	5.8640573	0.5079665	0.2740199
ENSG00000253293.4	HOXA10	-4.17028007306515	0.964605785547468	1.53712572382171e-05	0.00127338411247348	0.429582	0.0762505	7.3524598	8.043004
ENSG00000125538.11	IL1B	3.49896455489096	0.809961229843916	1.56088535179256e-05	0.00128292533679295	60.203661	41.1902592	7.075378	2.10886
ENSG00000172005.10	MAL	5.81970432319669	1.34693250858534	1.5552819108961e-05	0.00128292533679295	3.239066114864	908.40513	2.352752	2.06506
ENSG00000175984.14	DENND2C	4.435214002775	1.0271878443362	1.57576613758403e-05	0.00129009697178217	1.985617	16.40336	0.30417243	0.3392203
ENSG00000183578.7	TNFAIP8L3	3.6969492533214	0.85694020065436	1.60234483646138e-05	0.00130675274036553	9.62302	5.963608	0.315372	0.759437
ENSG00000189056.13	RELN	5.35197540900186	1.24331537372077	1.67287684837219e-05	0.00135782336465342	5.7405107	0.921643000431852	0	0.058122286
ENSG00000277494.1	GPIHBP1	4.93665304060752	1.14700975055867	1.67792476475612e-05	0.00135782336465342	11.3439	0.894714	0.182484	0.0580072
ENSG00000170011.13	MYRIP	3.7519374651351	0.873216102616209	1.73368656521896e-05	0.00139755141232401	1.149677188	0.83014	0.0957685	0.0407567
ENSG00000182333.14	LIPF	6.29605415060153	1.46614712684177	1.7525693536776e-05	0.00140736019477888	0.333964	2093.27003	0.161984	0.2436335
ENSG00000178828.6	RNF186	-4.87307838407417	1.13679540003469	1.81363054386004e-05	0.00145083521254819	0	0.151312	8.6209	2.91071
ENSG00000184905.8	TCEAL2	4.88204437750397	1.13950852865057	1.83280707846473e-05	0.00146060089572404	1.40911	2.683654	0.0542337	0.0456784
ENSG00000143369.14	ECM1	3.75459637999755	0.876852143823219	1.85301233258667e-05	0.00146906057756994	76.371333	243.576466	16.458986	6.3582723
ENSG00000165478.6	HEPACAM	6.22345627060266	1.45361529053939	1.85751176570381e-05	0.00146906057756994	7.037371	0.0547241	0	0
ENSG00000126950.7	TMEM35A	3.88781367916612	0.908431493235711	1.87145939315413e-05	0.00146906057756994	1.34674	1.35106	0.0952359	0.060534
ENSG00000141579.6	ZNF750	5.85586699692099	1.36822868971056	1.86986499698715e-05	0.00146906057756994	0.2150733	73.4237	0.2174788	0.0919221
ENSG00000121552.3	CSTA	5.74588369404124	1.3434300011701	1.89407543229613e-05	0.00147618923655126	23.9244334	6471.8661	19.652239	15.3651
ENSG00000143546.9	S100A8	5.81289925645425	1.35911934493713	1.8946271512586e-05	0.00147618923655126	501.10228	31319.656	153.2742	5.959366
ENSG00000126262.4	FFAR2	4.47474832756029	1.04702748293716	1.92200499445714e-05	0.0014919741732899	10.221363	1.37399	0.231018	0.152221
ENSG00000244734.4	HBB	5.68765199697742	1.33429144235032	2.01993367294448e-05	0.00156220626757356	2722.671652	14.1881	12.5901	4.30651
ENSG00000140459.17	CYP11A1	4.56750895445005	1.07333554534534	2.08643574196307e-05	0.00159189973624149	1.591846	6.536422	0.0621231	0.162478
ENSG00000092009.10	CMA1	4.96092257038778	1.16535895175588	2.07196692375519e-05	0.00159189973624149	6.87258	1.2956	0.129693	0.0545062
ENSG00000250786.1	SNHG18	3.22986268131265	0.759451409439667	2.11030025195869e-05	0.00159189973624149	5.93587	7.75533	0.976666	0.533144
ENSG00000173338.12	KCNK7	4.14875187552176	0.975542800978454	2.11149447337723e-05	0.00159189973624149	2.591325	10.956048	0.3117663	0.3138344
ENSG00000237975.6	FLG-AS1	4.90627545407523	1.1533711749228	2.10119996642158e-05	0.00159189973624149	0.3783814	1.697772	0.0357204	0.0151549
ENSG00000185052.11	SLC24A3	3.62931424168737	0.853180755016613	2.10113666509263e-05	0.00159189973624149	19.55868	5.87069	0.895791	1.01436
ENSG00000211934.3	IGHV1-2	-5.36034869491874	1.26029062320081	2.10676986536436e-05	0.00159189973624149	0	1.10556	16.4686	120.674
ENSG00000123689.5	G0S2	5.72833203026283	1.34833844673799	2.15266392076506e-05	0.00161712125861344	3098.5	10.4008	8.18853	8.07937
ENSG00000064042.17	LIMCH1	3.42204177552599	0.805894996003454	2.17365864991746e-05	0.00162706113012929	15.8550997	5.9108968	1.27019731	0.751963387
ENSG00000102547.18	CAB39L	2.84503877035294	0.671284354563809	2.25316886474495e-05	0.00168057531089642	13.012708	13.689471161511	1.795781	2.096705
ENSG00000170703.15	TTLL6	-3.96620753397262	0.936911446446738	2.30308514072484e-05	0.00171171494554794	0.0545312	0.2070761	3.4913996	2.7240294
ENSG00000172137.18	CALB2	5.80140496006717	1.3711530347342	2.32612072587164e-05	0.00172272665348211	143.105636	1.63024	0.639201	0.0342907
ENSG00000169605.5	GKN1	6.00281083506553	1.41910164915144	2.33683362725875e-05	0.00172456676034212	0.991339	958.69695	0.467884	1.43835
ENSG00000182575.7	NXPH3	4.33824108836483	1.02606736417911	2.35748926212895e-05	0.00173370587526178	5.39124	0.811314	0.1440134	0.097397
ENSG00000169122.11	FAM110B	4.80052261459031	1.13572341514084	2.36994711550538e-05	0.0017367734823034	17.018814	0.969446	0.23437	0.174125
ENSG00000283703.2	VSIG10L2	5.98945621765235	1.41748643905746	2.38509987225403e-05	0.00174178774294676	1.5059842	0.164729	4.38602e-08	0
ENSG00000165828.14	PRAP1	-5.51359836359487	1.30663018710281	2.44618520260687e-05	0.00177403445195285	0.19353400386275	0.670663	1.911451	137.5516
ENSG00000175161.13	CADM2	5.28228485707879	1.25171629546009	2.44265881741901e-05	0.00177403445195285	0.1803085	0.262512	0	0.00433798
ENSG00000179639.10	FCER1A	4.48261895149535	1.06359018120508	2.50208994402482e-05	0.00180832079782125	2.77562	18.8997	0.509169	0.213094
ENSG00000168925.11	CTRB1	5.44997760257527	1.29435941697707	2.54738790483405e-05	0.00183473206520333	0.733932	4.268422	0.0442858	0
ENSG00000221932.6	HEPN1	6.14961430983714	1.46105677072369	2.56482909167385e-05	0.00184096756617781	20.9782	0.106109	0	0
ENSG00000125675.17	GRIA3	4.96196982153097	1.18001256342495	2.61065534706187e-05	0.00186746503136757	0.919365	0.304576	0.0186853	0.00849287
ENSG00000129824.15	RPS4Y1	-6.14903933002636	1.46289974794364	2.63025498272243e-05	0.00187508551642447	0.0851154	0.149509	764.02316	0.1314237
ENSG00000138356.13	AOX1	5.34725869293647	1.27315417919196	2.66904665256778e-05	0.00189088932672276	32.41052	2.5605228	0.0194477	0.3162020101
ENSG00000174307.6	PHLDA3	3.21938063219852	0.766539590580084	2.67046729667415e-05	0.00189088932672276	74.06864	47.022492	4.60424	8.070559
ENSG00000256812.1	CAPNS2	5.84495794885067	1.39270364583157	2.70661935444829e-05	0.00190232398446066	0.172572	67.5003	0.117053	0.0985021
ENSG00000151632.17	AKR1C2	4.85510141342656	1.15706489102141	2.71611059051054e-05	0.00190232398446066	409.424495	220.43827	14.049866	0.5060955
ENSG00000267206.5	LCN6	5.85750813448584	1.39583509557298	2.71169049553927e-05	0.00190232398446066	8.36578	1.652151	0.020901	0
ENSG00000183019.7	MCEMP1	5.75468268103863	1.37163810874562	2.7229218728861e-05	0.00190232398446066	7.18192	0.2123956	0	0.0263014
ENSG00000142623.10	PADI1	5.94108297108884	1.41665567077082	2.74394677754513e-05	0.001910643870783	0.1388479	65.41286	0.1398976	0.0197624
ENSG00000078399.17	HOXA9	-3.69678833372016	0.883458494844986	2.85856734706802e-05	0.00198386466977479	0.3581028	0.2802949	4.00954	7.6603793
ENSG00000182263.13	FIGN	3.30755558483383	0.790866237624544	2.88710171886542e-05	0.00199705494804291	0.8598875	0.517044	0.0862369	0.0561039
ENSG00000188517.15	COL25A1	5.30975645041575	1.26994122664735	2.90097022470696e-05	0.00200004720196162	1.5622783	0.0941296	0.0107	0.00909263
ENSG00000163221.8	S100A12	4.99440445709373	1.19823806853764	3.07117299917195e-05	0.00211044966851295	43.4701	51.2865	1.82466	0
ENSG00000070193.4	FGF10	4.56315760804846	1.09674534477151	3.17363266217088e-05	0.00217373094661567	6.55873	0.859922	0.1227377	0.0835787
ENSG00000263155.5	MYZAP	3.97312828858019	0.95567646907466	3.21891669622435e-05	0.0021975659620901	57.631242	10.249525	2.466783	1.311462
ENSG00000064205.10	WISP2	5.38835971307697	1.29664651760881	3.24418099515887e-05	0.00220762303498489	150.711525	1.3673244	0.5993896	0.7656669
ENSG00000213088.10	ACKR1	4.95825606343906	1.19373706678696	3.27345288260955e-05	0.00222033329989041	258.726698	19.058313	0.640378	3.937593
ENSG00000134769.21	DTNA	4.11292484123524	0.990826936678539	3.31022514749764e-05	0.00223803254407752	14.3408028694	2.4758163	0.4996173	0.30868745
ENSG00000256039.1	LINC02446	-4.16319277115223	1.0052521182603	3.4513000766781e-05	0.00232590991341146	0.63133	1.1323	8.66507	41.0578
ENSG00000188536.13	HBA2	5.49287285861602	1.32714498142092	3.49029453236725e-05	0.00233715920459697	4016.9912	20.133	19.3399	11.212309
ENSG00000067048.16	DDX3Y	-5.95151041580021	1.43781907162445	3.48424253378731e-05	0.00233715920459697	0	0	7.805748	0.1629692
ENSG00000229754.1	CXCR2P1	-3.85560609365219	0.93190284604603	3.51343506687683e-05	0.00234516196072202	0.161195	0.567801	5.4216	10.8389
ENSG00000146039.10	SLC17A4	-5.96135253903286	1.44275074962722	3.59721915589e-05	0.00238632974961335	0	0	0.0971822	3.68436
ENSG00000131471.6	AOC3	5.02128106782796	1.21524960559216	3.59788253675185e-05	0.00238632974961335	335.930771	8.312111	2.1672671	3.261666
ENSG00000151365.2	THRSP	6.02260714859706	1.45841055640564	3.63443781592226e-05	0.00240297104681119	304.781	0.0815872	0.146878	0.0825606
ENSG00000183607.9	GKN2	5.84975030121915	1.41795157694532	3.69940305681622e-05	0.00243823234804438	0.234055	233.08313	0.399107	0.200696
ENSG00000131730.15	CKMT2	5.09321758492811	1.23524156945599	3.73553646594673e-05	0.00245432942914663	17.826041	0.9362862	0.1838507	0.0791065
ENSG00000164483.16	SAMD3	-3.70553041606802	0.899584165887747	3.80257328958194e-05	0.00249056667426087	0.713994	0.517336	5.9641529	16.5704552
ENSG00000170837.2	GPR27	3.80996554844704	0.926242429649194	3.89947057745833e-05	0.00253816782089904	1.13314	2.87463	0.10565	0.143339
ENSG00000143816.7	WNT9A	3.50830265475903	0.852797386813076	3.89070580547309e-05	0.00253816782089904	8.3987	4.48345	0.880154	0.256335
ENSG00000189129.13	PLAC9	4.78734976970759	1.1665271436085	4.06184343973679e-05	0.0026275363164643	261.3291	10.545184	3.741406	2.30141
ENSG00000111907.20	TPD52L1	4.59092313657303	1.11850012432435	4.0512857734607e-05	0.0026275363164643	12.70501819	140.615010646748	1.0191927	3.0168178
ENSG00000276557.1	TRBV18	-5.25796860972969	1.28168477125147	4.08907277185549e-05	0.00263701157616367	0.201243	0	4.4546	19.6733
ENSG00000257017.8	HP	5.65902882571983	1.3803482838655	4.13666658005202e-05	0.00265388473817718	34.0689771018639	0.58272241234655	0	0.1140331
ENSG00000164411.11	GJB7	-5.17521913238507	1.26240467064256	4.14056161736695e-05	0.00265388473817718	0	0.0190456	0.616181	1.60585
ENSG00000139926.15	FRMD6	3.58867624478693	0.876800068058673	4.25966941431719e-05	0.00271801086402852	12.351781	34.193111	2.851904324	0.940011
ENSG00000213144.2	AC084880.1	5.78913361137372	1.41455405975048	4.26654694529979e-05	0.00271801086402852	10.7599	1.42059	0	0
ENSG00000178538.9	CA8	4.32518921793019	1.05759656593731	4.32043233745777e-05	0.00274399822305386	2.253893	2.850044	0.1822925	0.0247659
ENSG00000256040.2	PAPPA-AS1	3.81890453777515	0.934151582949354	4.34921779509702e-05	0.00274767041125495	5.26643	1.64831	0.327381	0.129468
ENSG00000138650.8	PCDH10	5.18714510445206	1.26911016725069	4.36554342739586e-05	0.00274767041125495	0.61632	0.1611102	0.0108373	0
ENSG00000048545.13	GUCA1A	-5.78903408556465	1.41635964255224	4.36492573435219e-05	0.00274767041125495	0.034236	0	20.242895	0.117045
ENSG00000242288.9	AC022400.3	-5.68256677213137	1.39150235267496	4.43120950532015e-05	0.00278065030006003	0	0	0.907144	0.267121
ENSG00000127955.16	GNAI1	3.56040478569096	0.872509533910383	4.49102118203139e-05	0.00280977053594615	38.7745127	20.2444997897114	3.9601505	0.9788171
ENSG00000111432.4	FZD10	4.7051061403495	1.15669150425717	4.74737987906749e-05	0.00296131949063618	1.209696	5.69394	0.1693383	0.0130691
ENSG00000285304.1	Z83844.3	-5.64250764233877	1.38751640918143	4.7699093231623e-05	0.00296654390220056	0	0	0.911887	0.376525
ENSG00000100739.10	BDKRB1	4.59906735618998	1.13338574838895	4.95344178358613e-05	0.00307157356041958	120.437771	8.189341	1.000599	2.300191
ENSG00000175906.4	ARL4D	4.56229948834955	1.12490712145023	4.99817811199854e-05	0.00309017153537987	16.738	112.085	3.53762	0.398942
ENSG00000165194.15	PCDH19	4.47012539324774	1.10258977379691	5.03050059942088e-05	0.00309914394056555	1.38465224135	0.3066164	0.00991176	0.0416616
ENSG00000197353.3	LYPD2	5.57978050989932	1.37647989437756	5.04226386627631e-05	0.00309914394056555	1.06367	162.674	0.855946	0.101644
ENSG00000168329.13	CX3CR1	2.99489335862553	0.739306419621378	5.10101024532072e-05	0.00311912906451092	2.120999	2.05816	0.27754100110876	0.2632900122834
ENSG00000136999.4	NOV	4.13465658917806	1.02070425949508	5.10454348550621e-05	0.00311912906451092	7.622693	1.53585	0.122671	0.277427
ENSG00000127252.5	HRASLS	5.72464104180369	1.41361779362168	5.12968116348368e-05	0.00312537754376321	0.777391	4.59079	0	0
ENSG00000228789.7	HCG22	5.6179351965979	1.38978997315625	5.29315348071622e-05	0.00321562909571975	0.25614882	18.724523	0	0.0678363828178
ENSG00000244953.1	AC087521.1	5.39492049221709	1.33520786486241	5.33351311887309e-05	0.00322147266450896	2.87496	0.214879	0	0.0218164
ENSG00000063660.8	GPC1	2.86818149231043	0.709759063190479	5.32093313731693e-05	0.00322147266450896	50.4437769	58.875669	11.266984	4.960348
ENSG00000142973.13	CYP4B1	5.51571679408796	1.36589732890627	5.38712918465283e-05	0.00323950226418645	1.073351	33.159146	0.2089396	0
ENSG00000267385.1	AC011498.4	4.56303319655487	1.13006436816956	5.39427592061201e-05	0.00323950226418645	4.24843	0.633672	0.051652	0.0786662
ENSG00000092096.16	SLC22A17	3.07127884090014	0.761336202434111	5.48204146158503e-05	0.00328280305695316	14.1669393436	7.3156004	1.184983	1.3821514546
ENSG00000064655.18	EYA2	4.19012611221709	1.03886627734452	5.49839477884549e-05	0.00328321527549353	8.390854	22.80969	1.292061	0.147469
ENSG00000171243.7	SOSTDC1	5.52551394732384	1.37124803055014	5.58834781379863e-05	0.0033180221481418	0.141131	4.60944	0	0.0241139
ENSG00000110492.15	MDK	-2.75024879148796	0.682517565118049	5.58801982342391e-05	0.0033180221481418	71.519433398339	92.0003372615	954.935675	501.71138
ENSG00000168481.8	LGI3	5.79453184922305	1.4382582704181	5.60495343971171e-05	0.00331848076674909	0.0809526	1.88572949	0	0
ENSG00000056736.9	IL17RB	-3.21422917981956	0.798088595507868	5.63948868873811e-05	0.00332952235006372	0.660988	1.6258672	13.32109	15.753564
ENSG00000144730.17	IL17RD	3.38811157189186	0.841737920124423	5.69418315770164e-05	0.00335237035961429	1.7244	0.991469	0.0778263	0.160783
ENSG00000162654.8	GBP4	-3.03077007228388	0.753087565413624	5.71064281127976e-05	0.0033526432123701	10.46183	15.86118	214.5693	84.9012
ENSG00000102802.9	MEDAG	5.54861663546427	1.37924981619635	5.74801463289321e-05	0.00336515750532985	379.672	0.783855	0.69894	1.24073
ENSG00000185633.10	NDUFA4L2	3.37189696640301	0.838332002608726	5.76693395596393e-05	0.00336682921401248	40.173439507	121.12948386	10.1467156245	5.325497649
ENSG00000198502.5	HLA-DRB5	-5.16431076605162	1.28512280858301	5.8561153873078e-05	0.00340939784451623	7.40638	3.85831	1417.2	12.2093
ENSG00000166681.13	BEX3	3.15587874892791	0.786672152300832	6.02875964756315e-05	0.00350018763028465	161.82497	64.0729	16.08827	9.77777
ENSG00000134339.8	SAA2	4.74087225181888	1.18276312197618	6.11567808070383e-05	0.00354084245562076	450.2417	18.805184	8.347837	2.538417
ENSG00000258498.8	DIO3OS	3.39402101472209	0.847206720864855	6.17214550192944e-05	0.00356369139324901	16.739532	5.87008700742394	1.275559	0.8124387
ENSG00000203618.5	GP1BB	3.50088917698299	0.87454179424305	6.25145598161046e-05	0.00359117448965512	4.74018	3.91583	0.606292	0.171909
ENSG00000008300.16	CELSR3	-4.02318033697168	1.00503734699941	6.2540134964651e-05	0.00359117448965512	0.1944249	0.4753738	17.32666	2.40932947
ENSG00000137878.17	GCOM1	2.94406202535051	0.736909505519846	6.46540409470204e-05	0.00369842490054162	2.9595813	5.4092146	0.6337003	0.5045314
ENSG00000021488.12	SLC7A9	-4.44781057660225	1.11341222851432	6.47608158069934e-05	0.00369842490054162	0.3213490453636	0.145027	1.966146	16.577242
ENSG00000196735.11	HLA-DQA1	-2.78733836176651	0.698253273401016	6.55534897084439e-05	0.0037313540117203	32.7958563	18.2316535	238.29225	217.60084
ENSG00000077274.8	CAPN6	3.71586098833097	0.930974482693131	6.56934791891211e-05	0.0037313540117203	4.93216	4.66791	0.112652	0.490269
ENSG00000166482.11	MFAP4	3.90682895280764	0.979173987935289	6.60947093551766e-05	0.00374399733344634	404.285178	69.553098	9.287587	16.412012363
ENSG00000282122.1	IGHV7-4-1	-5.07429802003998	1.27308795988522	6.7247797333315e-05	0.00378883490405631	0.450997	2.96117	12.6353	312.793
ENSG00000198729.4	PPP1R14C	5.32413886545098	1.3356367673164	6.71349305096306e-05	0.00378883490405631	0.217314	15.5147	0.121677	0.020622
ENSG00000187955.11	COL14A1	3.84144672405618	0.964028457865554	6.7541077708791e-05	0.00379515669624276	90.579183	16.0449201	2.457972	3.756646
ENSG00000151468.10	CCDC3	4.7244250294577	1.18654554954254	6.84346392975001e-05	0.00383508450544466	299.863383	9.42314	4.5070975	2.512752
ENSG00000167741.10	GGT6	5.64928086333217	1.419284941515	6.88077472755441e-05	0.00384571086706168	0.0404078	37.497704	0.0813591	0.0345002
ENSG00000204876.4	AC021218.1	-4.79251747341539	1.20442606528757	6.91800918497958e-05	0.00385623815180816	0	0.20355	11.157	3.61942
ENSG00000163637.12	PRICKLE2	3.67489657033021	0.924112940732311	6.98856559282989e-05	0.00387495625026777	9.7809082	1.995876922534	0.50041740432827	0.3376638303481
ENSG00000145649.7	GZMA	-3.42819021039944	0.861966910775747	6.97398753829944e-05	0.00387495625026777	5.74117	12.9034	85.7847	191.495
ENSG00000275718.1	CCL15	-4.11008440007143	1.03382870418103	7.02034624391694e-05	0.00388230704290911	0.180451	0.27776	3.136373	9.60451
ENSG00000170153.10	RNF150	4.22552428946626	1.06449069469557	7.20155216134662e-05	0.00397203504604379	9.4649654	0.9753931	0.1510022	0.255886
ENSG00000120738.7	EGR1	3.6014841522707	0.907435692498695	7.22176500861541e-05	0.00397272894529056	1183.61	378.507	95.804	27.6461
ENSG00000077063.10	CTTNBP2	4.04450092724231	1.0201930756901	7.35664250549464e-05	0.00401530912168391	1.3799771	9.782036	0.3628814	0.19622568903
ENSG00000187054.15	TMPRSS11A	5.76668618473791	1.4541470608819	7.31860960734198e-05	0.00401530912168391	0.0474725	65.48944	0.10898	0.0141096
ENSG00000274290.2	HIST1H2BE	-4.78282577159871	1.20638813022955	7.35243875163374e-05	0.00401530912168391	0	0.0273297	1.304833	1.210564
ENSG00000212747.4	RTL8B	2.80287499444314	0.708139910534951	7.55543962466336e-05	0.00409184648819947	10.2711	12.6147	2.34194	1.19124
ENSG00000227619.1	AL391056.1	-4.02068715634608	1.01580152050889	7.55348953665539e-05	0.00409184648819947	0.0209655	0.10572	2.28	1.3247
ENSG00000198523.5	PLN	3.32330997080427	0.839543132317565	7.54300337901864e-05	0.00409184648819947	9.10507	4.18269	0.474917	0.782207
ENSG00000165272.15	AQP3	4.7538265925282	1.20226999735733	7.68417706824151e-05	0.00415084193745551	40.31602	1408.532262	21.883669	9.831749
ENSG00000138061.11	CYP1B1	3.47145548480577	0.879847797296609	7.96275879909583e-05	0.00427926824795512	23.003305	30.944826	1.01352	3.2965251
ENSG00000008517.16	IL32	-2.98955750199887	0.757661677238313	7.95444733110117e-05	0.00427926824795512	139.904382	101.732608	874.226333	1600.951424
ENSG00000251491.2	OR7E28P	5.02941632470457	1.27537819944935	8.0310869461993e-05	0.0043049501612632	1.033	3.01705	0.0629591	0
ENSG00000163421.8	PROK2	5.19498057819914	1.32002395005485	8.30167704116437e-05	0.00443864410984092	10.64823	0.5958667	0.105821	0
ENSG00000144339.11	TMEFF2	5.58705400235198	1.42010818710575	8.34585058361323e-05	0.00445090794865012	0.215787	1.113019	0	0
ENSG00000184530.8	C6orf58	5.79401220716721	1.47340423890877	8.4102592200657e-05	0.00447387368003444	0.0470005	54.2686	0	0.0402095
ENSG00000256349.1	AP002748.4	-5.48278469232528	1.39463176673235	8.44704204686597e-05	0.00448206466481681	0	7.22907e-09	0.481366	0.442434
ENSG00000189320.8	FAM180A	5.15689486134037	1.31488835170578	8.78439599713552e-05	0.0046492968612112	26.279287	0.396601	0.0594287	0.211114
ENSG00000174403.15	MIR1-1HG-AS1	4.6662066659314	1.19051461388082	8.8737612183395e-05	0.00468476477015561	0.4909498	0.887584	0.0199035	0.0168816
ENSG00000181195.10	PENK	5.21983487772856	1.33358998937729	9.07334832039161e-05	0.00470613512684338	15.683814	0.701377	0	0.120749
ENSG00000067840.12	PDZD4	3.20647913459367	0.819332548733844	9.09581464697635e-05	0.00470613512684338	2.972973	2.07048700445892	0.40742000570604	0.162692
ENSG00000062096.14	ARSF	5.31838632680199	1.35911317485836	9.11075128863468e-05	0.00470613512684338	0.157858	3.1719	0.0265322	0
ENSG00000089250.18	NOS1	5.05005201194714	1.29070024823761	9.12906483233103e-05	0.00470613512684338	0.055318722736	0.221666	0	0.0033695769988
ENSG00000124657.1	OR2B6	-5.58441032365628	1.4273660656746	9.13878046006612e-05	0.00470613512684338	0	0	7.02016	0.595542
ENSG00000105852.10	PON3	4.59768503467645	1.17478750470231	9.09184630687015e-05	0.00470613512684338	1.1175604269	1.3268397	0.0212628	0.0578709
ENSG00000175592.8	FOSL1	3.82551468715288	0.977208424021437	9.0502529201988e-05	0.00470613512684338	305.366158	77.01975	19.83387	4.501669
ENSG00000253686.1	LINC01484	-4.79184757184204	1.22458682329969	9.11444061366196e-05	0.00470613512684338	0.021817	0.0183391	0.5967557	1.841311
ENSG00000010932.16	FMO1	3.72145850304469	0.951067936236281	9.11844649633988e-05	0.00470613512684338	12.3238025273	3.2008435	0.3791192	0.602748
ENSG00000172403.10	SYNPO2	2.94450480430889	0.752531741429312	9.12327915670785e-05	0.00470613512684338	19.135531	17.5723084	1.6439756	3.081298
ENSG00000135298.13	ADGRB3	4.80263971586696	1.22806203419776	9.20111747202816e-05	0.00471506653047037	0.575743	0.2468468	0.01740054	0
ENSG00000079308.18	TNS1	3.84263181373846	0.982537360791962	9.19425909069949e-05	0.00471506653047037	119.4313625	18.287064904	3.252483	4.6550264
ENSG00000182636.6	NDN	3.72584719219324	0.953511924351715	9.32563054452762e-05	0.00476721684348181	64.5353	11.09309	3.000209	2.058369
ENSG00000211972.2	IGHV3-66	-5.369778946489	1.3750099075243	9.41219365142248e-05	0.0047869194782576	3.01233	3.8873	3.43292	1305.83
ENSG00000167916.4	KRT24	5.58344561393897	1.42983948941711	9.42465313495436e-05	0.0047869194782576	0.0560506	8.63391	0.0282762	0
ENSG00000117215.14	PLA2G2D	-4.21880076901409	1.08043076912138	9.43269118049711e-05	0.0047869194782576	0.3698095	2.203122	15.80486	67.1469
ENSG00000135218.18	CD36	5.01063523875046	1.28388392751521	9.51190144750736e-05	0.004815457546819	654.100984983214	6.27769900797069	5.426087	3.733542
ENSG00000100453.12	GZMB	-3.47183563748638	0.890124623780204	9.60367599155895e-05	0.00485020349655624	9.7909788	14.406335	86.499307	285.6792263
ENSG00000196335.12	STK31	-3.81264128986316	0.97772209460759	9.63858446268362e-05	0.00485613201330255	0.0652438	0.0959094	3.234762	0.7496561
ENSG00000242076.2	IGKV1-33	-5.32836385206879	1.36719117357152	9.72682480234128e-05	0.00488883743482664	67.27451	27.0069	54.9606	16044.058
ENSG00000184226.14	PCDH9	4.92630085303399	1.26533812104012	9.89026449000562e-05	0.00495909218770402	1.72294	0.0327951014559	0.00972783	0.01653618
ENSG00000204610.12	TRIM15	-4.45546778847184	1.14567643666081	0.000100682689092024	0.0049908751729367	0.07020039	1.33829	47.648712	19.06425
ENSG00000182950.2	ODF3L1	4.81130863915243	1.23715970554393	0.000100659946758265	0.0049908751729367	5.66258	0.518549	0.0957395	0.0403706
ENSG00000060566.13	CREB3L3	-4.61751904211656	1.18737891816372	0.000100727143382424	0.0049908751729367	0	0.2278235	8.7100711	4.697977
ENSG00000186115.12	CYP4F2	-5.16783999581377	1.32858852470374	0.000100359129056348	0.0049908751729367	0.0237855	0.0214073	0.1698238	5.097453
ENSG00000214711.9	CAPN14	5.66285905509239	1.45574558477757	0.000100241744654194	0.0049908751729367	0.0394732	110.7203	0.1888409	0.0449127
ENSG00000106366.8	SERPINE1	5.04904112619298	1.30030009541181	0.00010318345033283	0.00510052343284381	458.939	3.45738	3.44295	2.4243
ENSG00000206579.8	XKR4	4.51465815244087	1.16318655168831	0.000103906120760568	0.00512416090593115	0.112972	0.0904491	0	0.00409516
ENSG00000102683.7	SGCG	5.64230640093674	1.4548733107944	0.000105227218761081	0.00517712976059507	4.23203	0.111444	0	0
ENSG00000115602.16	IL1RL1	5.14828349842302	1.32794780253034	0.000105808036360459	0.00519351436552426	59.513114	0.506914506222	0.5541666	0.107524
ENSG00000253755.1	IGHGP	-5.0752173636292	1.30960110571948	0.000106453282432655	0.00519664512791484	1.34544	1.06809	2.16395	251.584
ENSG00000105366.15	SIGLEC8	-3.70216359382308	0.955391960568113	0.000106615649840325	0.00519664512791484	0.102962	0.4363498	3.7331495	7.0548038
ENSG00000170423.12	KRT78	5.53978519316329	1.42958738949129	0.000106583646538986	0.00519664512791484	0.5373179	162.3227	0.6047053	0.0255025
ENSG00000261520.5	DLGAP1-AS5	-4.58811296853896	1.18423152096369	0.0001069150163783	0.00519914577325473	0.1551398	1.72606	100.6145	10.987401
ENSG00000091986.15	CCDC80	4.59740705546409	1.18979468999701	0.000111529717919165	0.0054109985135828	461.294	14.3993127	4.831372	6.609291
ENSG00000124491.15	F13A1	4.45831245551101	1.15456927759866	0.000112715714285678	0.00545590913559705	59.569418	2.50138	0.96102	0.85876
ENSG00000100450.12	GZMH	-3.85437195994794	0.998608926038703	0.000113507197812817	0.00548156073492819	5.51318	2.863401	29.06382	155.00515
ENSG00000254290.1	AC124067.4	-4.96373211939774	1.28790405829013	0.000116148343407453	0.00559621409075126	0.0216373	0.0181873	0.24622	3.12242
ENSG00000121440.14	PDZRN3	2.71004878720227	0.703892042517863	0.000118073694537302	0.0056759324857966	15.1079693	8.85913941	2.176922	1.704707
ENSG00000050628.20	PTGER3	4.80323490702954	1.24841673885415	0.000119348193273435	0.00569771065379564	63.8953948	1.117983	0.46277398	0.685989
ENSG00000129988.5	LBP	5.54509145685933	1.4412912628554	0.000119422782378289	0.00569771065379564	36.1746	0.0225155	0.0539723	0.0457115
ENSG00000137440.4	FGFBP1	5.45540209641464	1.41848259211518	0.000120090059717151	0.00569771065379564	0.689941	314.68	1.39719	0.104112
ENSG00000081277.12	PKP1	5.43832557824291	1.41429708126217	0.000120429687467507	0.00569771065379564	2.24988	253.03257	1.279092	0.01969480231
ENSG00000242265.5	PEG10	4.43144114809946	1.1522857605948	0.000120168011151166	0.00569771065379564	34.61049785634	2.3239212	0.2827448	0.7535837
ENSG00000206172.8	HBA1	5.12279292608277	1.33145693282807	0.000119324751026581	0.00569771065379564	1887.3361	9.31212	13.9632	6.44591
ENSG00000254445.1	HSPB2-C11orf52	5.57990708557059	1.45100630802085	0.00012028578922409	0.00569771065379564	7.079710106602	0.318767	0	0
ENSG00000162849.15	KIF26B	-3.39298764784728	0.883211168615895	0.000122210319379317	0.0057689326213313	0.15865	0.14667	4.067052	0.881745
ENSG00000160801.13	PTH1R	4.62448300735545	1.20504051192137	0.000124234444369783	0.00585130274055345	14.722821	0.973251	0.195176	0.1570552
ENSG00000133321.10	RARRES3	-3.15261306218222	0.821640275089296	0.0001245592283994	0.00585344589242829	40.80730109936	82.355323	1192.90191	400.54407
ENSG00000234840.1	LINC01239	4.79655294050656	1.25118845842209	0.000126282715997178	0.00592116206842251	3.60126	0.221507	0.0221175	0.0375019
ENSG00000182175.14	RGMA	3.43325176020198	0.897067529317073	0.00012961218759003	0.00605020454276044	15.4225801	33.2505259	1.03671097	2.940082
ENSG00000121871.3	SLITRK3	5.4211691154477	1.4164591066474	0.000129573227200071	0.00605020454276044	0.401097	0.16059	0	0
ENSG00000197380.10	DACT3	2.78159589167718	0.727532444434172	0.000131661913673447	0.00613222677484841	4.1276036	2.816076	0.5898953	0.4639843
ENSG00000152931.7	PART1	5.48515914880201	1.43531220635308	0.000132599860513476	0.00616221835144555	0.1214114	0.9437463	0	0
ENSG00000211659.2	IGLV3-25	-5.38763805360675	1.41054018251483	0.00013369178458466	0.0061992170644024	23.8152	27.0648	12.486	12385.1
ENSG00000253161.5	LINC01605	4.90802510574256	1.28559966413088	0.00013470528750032	0.00622244102088565	1.05192	3.870484	0	0.0752671
ENSG00000165269.12	AQP7	5.06813360772354	1.3275898728624	0.000134786403143379	0.00622244102088565	315.860873	1.6598281	1.433189	2.0354573
ENSG00000183287.14	CCBE1	3.71901546301314	0.974331724914816	0.000135089074471912	0.0062227074985864	0.441285	0.330948	0.03187607	0.0139419
ENSG00000168427.8	KLHL30	4.70339841785213	1.23266346798853	0.000135831138227034	0.00622950727811905	2.35576	0.168456	0.0134491	0.0342669
ENSG00000273983.1	HIST1H3G	-4.31142336749979	1.12988931779489	0.000135746456247221	0.00622950727811905	0.0426498	0.125465	6.35664	0.691933
ENSG00000109107.13	ALDOC	3.26289118104186	0.855571631914061	0.000136903162209753	0.00626496370470351	75.434216	22.375867	4.307768	5.305513
ENSG00000138039.14	LHCGR	5.57934429709312	1.4636913253652	0.000137941054331347	0.00629870709745249	2.388551	0.0417834	0	0
ENSG00000197769.5	MAP1LC3C	4.8021092590637	1.26018236957994	0.000138603968378366	0.00631521863748298	4.04943	0.445057	0.0492405	0.0409448
ENSG00000156535.14	CD109	3.24490304925853	0.851976692724645	0.000139712972419097	0.00635193967230339	2.884067	7.665226	0.80614405821	0.31131728059
ENSG00000197959.13	DNM3	2.85378183422792	0.749782662772486	0.000141149420996293	0.00640335652524093	1.8239248	1.2762119	0.2195633	0.2174139
ENSG00000005073.5	HOXA11	-4.52872997633203	1.19104872231962	0.000143356351166388	0.00648942929610439	0.0486649	0	0.929349	1.283970415058
ENSG00000102010.14	BMX	4.45271230758294	1.17206373114652	0.000145259994323701	0.00656143151084148	7.120908608	0.458973	0.1541767	0.0690891
ENSG00000166173.10	LARP6	3.98477996146754	1.04936244632563	0.000146260509451957	0.00657923064399521	36.097828	3.6711476	1.1437515	0.847317
ENSG00000197766.7	CFD	4.72128492934765	1.24332745401596	0.000146281858872168	0.00657923064399521	1980.6772	41.547966	11.671	26.53684
ENSG00000111713.2	GYS2	5.46424621660376	1.43981115771017	0.000147576153802215	0.00662323042299922	0.111532	1.05326	0	0
ENSG00000183734.4	ASCL2	-4.53027264438005	1.19414485894511	0.000148396298695931	0.0066458077443761	0.456249	1.60835	5.15069	94.3286
ENSG00000171714.11	ANO5	3.63880252457701	0.9593290184479	0.000148795935920043	0.00664949684637137	0.614764	0.417162	0.0587396	0.01248721
ENSG00000172935.8	MRGPRF	3.69362202044054	0.974024073174506	0.000149363088292619	0.00666064035643619	32.016361	5.46733	1.02008	1.42198
ENSG00000275832.4	ARHGAP23	2.59410104117344	0.684326462924293	0.000150201465799433	0.00666964517307269	38.819474	41.600048	9.808852	4.822667
ENSG00000214456.8	PLIN5	4.179543846928	1.10254701705216	0.000150158112572184	0.00666964517307269	50.927257	3.4946554	1.2207749	0.9557292
ENSG00000139910.19	NOVA1	4.10678953258075	1.08370023197608	0.000150890545780857	0.00668607811632345	15.025176	1.840491	0.1869692036147	0.4942023
ENSG00000186766.7	FOXI2	5.4554405844306	1.44015374741711	0.000151806223253752	0.00670830383182535	0.109472	1.01085	0	0
ENSG00000171451.13	DSEL	3.88265582072173	1.02506243627379	0.000152032268720695	0.00670830383182535	3.28071	0.50036	0.15764	0.0581079
ENSG00000176014.12	TUBB6	3.13606686227529	0.828801364709568	0.000154415804667042	0.00679916144961458	384.950495	122.013842	26.4879323	29.479196
ENSG00000196090.12	PTPRT	5.35769572096064	1.4168266269161	0.000155901327218941	0.00683590465396432	0.165414	0.1001616	0	0
ENSG00000164128.6	NPY1R	4.5577229206246	1.20527685340431	0.000155902591945939	0.00683590465396432	11.987226	0.546069	0.1753632	0.1087812
ENSG00000010319.6	SEMA3G	4.39797330062787	1.16504918927331	0.000160055817190251	0.00700336090290287	50.174171	1.924705	0.948134	0.651499
ENSG00000260105.6	AOC4P	4.75760686358191	1.26095829155875	0.000161290528389524	0.00704268371774173	3.592953	0.6706185	0	0.0532434
ENSG00000225756.1	DBH-AS1	-3.02932541777708	0.803306001002798	0.000162547233972922	0.00704618259683692	0.875067	0.572424	5.63483	10.0686
ENSG00000137975.7	CLCA2	5.29804742799951	1.40478060673326	0.00016230742024219	0.00704618259683692	2.77656	133.05083	0.8801	0.0105299
ENSG00000277075.2	HIST1H2AE	-3.29331284431317	0.87336903004217	0.000162715414708196	0.00704618259683692	1.0502	1.42682	26.7697	10.2171
ENSG00000041982.15	TNC	2.57778672428999	0.68350663117462	0.000162324868351515	0.00704618259683692	20.7991782	14.4673994	4.084942	2.3539261
ENSG00000166317.11	SYNPO2L	4.88203307647801	1.29535685000986	0.00016398750021102	0.00707204530231021	0.06019664	2.769033	0.0241923	0.0170649
ENSG00000205236.6	AC105052.1	5.33722495252356	1.41609887530591	0.000163926864065594	0.00707204530231021	0.273794	0.352669	1.58309e-05	1.55487e-08
ENSG00000164850.14	GPER1	3.41319874663143	0.905787714415885	0.000164422048046109	0.00707622526693716	5.819755810794	1.618283	0.335497477	0.313655
ENSG00000177807.9	KCNJ10	-4.24624980915459	1.12757931978898	0.000166009808756779	0.00712991717568305	0.04776026	0.4401165	3.2296100859	13.8221250034392
ENSG00000128383.12	APOBEC3A	3.4172492458942	0.908005713714457	0.000167574065526069	0.00718238208458259	24.426062	7.056016	2.014418	0.8185691
ENSG00000152092.15	ASTN1	5.38279806366421	1.43098288752639	0.000168823841034166	0.00722118139639814	0.320991	0.0686639	0	0
ENSG00000103647.12	CORO2B	4.60196541452681	1.22403215024939	0.000170132932662677	0.00724759377170131	13.13729	0.3414217	0.136306	0.167156
ENSG00000198915.11	RASGEF1A	-3.05982414558646	0.813761583849931	0.000169846105179827	0.00724759377170131	0.46563	1.304993278	11.3002809	9.1580227
ENSG00000091128.12	LAMB4	4.93068877870298	1.31207864218331	0.000171330484052772	0.00728380449343213	0.1144307	1.907501	0.0136667	0.0169241
ENSG00000101098.12	RIMS4	5.34785520725641	1.4239041328782	0.000172809933887924	0.00732245177929551	0.389244	0.1426933	0	0
ENSG00000203685.9	STUM	3.69912411840307	0.984966625007856	0.000172938290507719	0.00732245177929551	1.01334	0.469266	0.0243577	0.0697874
ENSG00000111057.10	KRT18	-3.46260466618777	0.92223639493413	0.000173636635065882	0.00733617445524147	26.924094	134.774413	1669.87888	1055.44096
ENSG00000244437.1	IGKV3-15	-4.54491558554133	1.21065246168814	0.000173962436387948	0.00733617445524147	8.80204	53.4104	189.703	2954.75
ENSG00000228742.10	LINC02577	-4.805841150415	1.28138169784637	0.000176471817681544	0.00741471623376326	0.0179486	0.143299	14.313794	0.495356
ENSG00000180190.11	TDRP	2.81037841024542	0.749348560688583	0.000176532439555698	0.00741471623376326	5.319295851	2.912845	0.6383662484	0.5694864002
ENSG00000099625.13	CBARP	3.6459773042974	0.972427919397875	0.000177290098312581	0.00743164634106677	7.326674	1.376201	0.2901462	0.3054451
ENSG00000278934.1	AC117489.1	4.20621472530197	1.12229848291601	0.000178351566205963	0.00745973384772456	0.354914	0.606799	0.0326579	0.0133479
ENSG00000177363.4	LRRN4CL	4.6019066477525	1.22802422026149	0.000178671997307015	0.00745973384772456	51.113	1.34568	0.955367	0.287141
ENSG00000108231.12	LGI1	5.39916320453076	1.44116430326889	0.000179397778620297	0.00747514521292804	0.238882533126	1.95357471	0	0
ENSG00000003096.14	KLHL13	3.4272823742615	0.915272443648472	0.000180718215901404	0.00751522437912208	2.74117	2.5530171	0.0980909	0.333035
ENSG00000137727.12	ARHGAP20	3.56817998451096	0.953157629919653	0.000181448528371265	0.00753065288343236	3.47535	0.815275	0.1175427	0.191495
ENSG00000105131.7	EPHX3	4.91247708737631	1.31267330959147	0.000182310603002915	0.00755147811924524	0.329784	37.200548	0.205166	0.307392
ENSG00000169594.13	BNC1	4.6959933212876	1.25600493766156	0.000184876126022812	0.0076150115456891	0.396101	11.206999	0.214973	0.0274015128434
ENSG00000235385.1	LINC02154	-5.2804352286833	1.41235153513553	0.000184934437556933	0.0076150115456891	0	0	1.591513	0.942053
ENSG00000127472.10	PLA2G5	4.74318662619312	1.26832765522592	0.000184227472871197	0.0076150115456891	25.7753297	0.8458429	0.0992536	0.376537
ENSG00000134539.16	KLRD1	-3.31657035261179	0.887799465439685	0.000187178740667123	0.00769231220714161	0.9589687	1.41451	7.76261	24.608679
ENSG00000176399.3	DMRTA1	4.75340032749425	1.27276842601733	0.000187943728809222	0.00770863524875243	0.0703625	1.46705	0.00882608	0.0150061
ENSG00000134873.9	CLDN10	4.20707120419699	1.12683709511772	0.00018882061298316	0.00772947505373838	2.5748738	1.38095	0.127595	0.053636
ENSG00000165379.13	LRFN5	4.65582478490694	1.24722929474915	0.0001892621127412	0.0077324456548593	5.092729	0.1537238	0.0403819	0.062863
ENSG00000166257.8	SCN3B	4.04832526397195	1.08601531752864	0.000193245108353997	0.00787981366924401	2.1653556	0.3615658	0.0260125	0.0817199
ENSG00000090932.10	DLL3	-4.55001447885662	1.22180957304579	0.000196093705264606	0.00798044265755509	0	0.0371781	1.659783	0.517422
ENSG00000107562.16	CXCL12	4.17836405037742	1.12218385609113	0.000196540605549709	0.00798312897619447	274.527318	20.038878	3.23251	7.65757
ENSG00000074181.8	NOTCH3	2.69041496474357	0.722842373879571	0.00019765573580026	0.00801289471303221	24.9666983	41.552609	7.375757	3.754961
ENSG00000211792.2	TRAV14DV4	-4.77117408373971	1.28300074370332	0.00020020177300734	0.00810044200861167	0	0.17789	4.51249	10.2274
ENSG00000226812.2	AL117382.1	-4.57500383184836	1.23095306834613	0.000201893411712385	0.0081531483932175	0.244529	0.287806	2.07508	28.14295
ENSG00000229839.6	AC018462.1	4.84013153128378	1.30355655887495	0.000204800722478886	0.00825465065852881	0.269183	26.94001	0.230213	0.173133
ENSG00000148841.16	ITPRIP	2.45043150966426	0.661208128135087	0.000210565603294368	0.00847071877053103	38.391183	28.162738	8.11409400519543	5.223722
ENSG00000105825.12	TFPI2	4.44184852803252	1.19897755519584	0.000211643586388622	0.00849777380674164	26.240154	1.0463226	0.5765204	0.2072693
ENSG00000104419.14	NDRG1	2.37418909954371	0.641037995734593	0.000212508012836134	0.00851616719126678	377.157229	290.375150000217	81.0856580003532	60.0926254373719
ENSG00000162595.6	DIRAS3	3.13373264741891	0.847005250707517	0.0002157868870899	0.00860063632335787	2.82874	1.88992	0.2601005	0.251238
ENSG00000147168.12	IL2RG	-3.16432010602463	0.855288932631198	0.000215846877526897	0.00860063632335787	15.728138	35.147085	192.062969	425.6299844
ENSG00000168079.16	SCARA5	4.84901631533618	1.31052188595427	0.000215544152751297	0.00860063632335787	84.152289	3.390452	0.0619627	1.10536000958097
ENSG00000154721.14	JAM2	3.46792129493311	0.937777114299182	0.000217285243927621	0.00860884957935542	28.0767466	5.278049	1.3511886	1.3348499
ENSG00000170298.15	LGALS9B	5.11598970900558	1.38337697930329	0.000217143074392925	0.00860884957935542	0.110516	31.81249	0.089647	0.1761183
ENSG00000131668.13	BARX1	3.16779124934009	0.856394995575589	0.000216464381126515	0.00860884957935542	32.94331	9.66541	2.691462	1.93397
ENSG00000168497.4	CAVIN2	3.23845370464929	0.876704756456896	0.000220846620700975	0.00873344211938065	30.3751	7.87167	1.81672	1.99426
ENSG00000095637.22	SORBS1	4.18802533080184	1.13425819450893	0.000222232165944373	0.00877168355184201	381.745473	20.96774205	11.194167	4.6075709
ENSG00000187288.10	CIDEC	5.15624499663891	1.39742002653219	0.000224402281450441	0.00884069063330788	618.903648	0.874897	1.427843	2.884553
ENSG00000184349.12	EFNA5	3.19321268888328	0.86593373328684	0.000226383808554548	0.00887157297930299	4.7684	4.481762	0.2373102	0.692974
ENSG00000260428.2	SCX	-2.73603088878473	0.741971745780202	0.00022645601144745	0.00887157297930299	1.29226	2.24008	16.7394	14.5355
ENSG00000124557.12	BTN1A1	-3.67532762581096	0.996543660357172	0.000225957174393225	0.00887157297930299	0.0350067	0.0587966	1.3734	0.657421
ENSG00000256713.7	PGA5	4.22809061648689	1.14757712904895	0.000229275378366175	0.00896526614771767	0.971886	10.551575	0.3011953	0.104222
ENSG00000105707.13	HPN	-2.91900776825123	0.792617566118517	0.000230736633821197	0.00898470086091213	0.958839	1.86321	11.212034	16.950462
ENSG00000164825.3	DEFB1	3.9475157105128	1.07199854656521	0.000231058436186442	0.00898470086091213	12.9727	134.735	4.87716	2.72719
ENSG00000271503.5	CCL5	-3.5962212988037	0.976564936795642	0.00023093845589999	0.00898470086091213	16.800456856	29.37058	135.1225	684.60211
ENSG00000211445.11	GPX3	3.99657152696861	1.08583567456555	0.000232648178862327	0.00902976514958428	1107.385371	141.584544	12.243333	42.9735844
ENSG00000065609.14	SNAP91	5.23784547101475	1.42402655175634	0.000234891564420713	0.0090999857646834	0.390121	0.31426956	0	0
ENSG00000050344.8	NFE2L3	-2.5908263394902	0.705132528510958	0.000238558160259747	0.00919106706044861	4.582503	6.79738	59.58778	31.2756
ENSG00000149948.13	HMGA2	-3.15864294448371	0.859637351665354	0.000238418269149187	0.00919106706044861	0.5085119	0.2221695	3.0412719	5.7220694
ENSG00000016391.10	CHDH	-3.24513340902264	0.882993113452885	0.000237708375533598	0.00919106706044861	0.2549	1.01837	11.05765	6.77892
ENSG00000205517.12	RGL3	3.01554941737188	0.821094078029832	0.000240095942633666	0.00923334103056697	8.5893509	12.672306	0.81135	1.69977583
ENSG00000112320.11	SOBP	4.06262853558885	1.10699837452669	0.000242598044044596	0.00931247693247379	7.303456	0.5858277	0.244238	0.1076545
ENSG00000188488.13	SERPINA5	3.93130720445013	1.07332147522	0.000249522968319114	0.0095086507959552	7.994023	1.618862	0.0849429	0.35169
ENSG00000111537.4	IFNG	-3.66616245760547	1.00093200829325	0.00024952325672863	0.0095086507959552	1.01583	0.31218	6.04076	19.434
ENSG00000123454.11	DBH	-3.49740974690249	0.954704148553553	0.000248943820200887	0.0095086507959552	0.0396054	0.0664577	0.703015	1.03646
ENSG00000171056.7	SOX7	3.39371589615426	0.926505818680022	0.000249357270963958	0.0095086507959552	32.2423	17.3701	3.90725	0.707673
ENSG00000224689.9	ZNF812P	4.43523740135546	1.21163502354376	0.00025168512299772	0.00957362702887336	0.3186109	6.713512	0.0843747	0.0952587
ENSG00000231768.1	LINC01354	5.32106055051563	1.4543758843121	0.000253541734209151	0.00962677754943767	1.448906	0.119143	0	0
ENSG00000175356.13	SCUBE2	3.16751654111268	0.866330406042896	0.000255936382675594	0.00970012774773558	8.07713	3.4749206	0.97194723	0.37808833
ENSG00000246430.6	LINC00968	4.75931509851909	1.30237957960724	0.000257861907331046	0.00975546519088698	9.163967	0.128077	0.0876913	0.05576
ENSG00000163071.10	SPATA18	2.77297808511923	0.75917034892975	0.000259555201642782	0.00978501743555509	2.284333973458	4.2878889	0.5307793	0.467983
ENSG00000227640.2	SOX21-AS1	5.30844360045666	1.45332433207969	0.000259576778194028	0.00978501743555509	0.0152849	4.27233	0.0153664	0
ENSG00000113805.8	CNTN3	4.6625184970379	1.27743288478227	0.00026232946024131	0.00987102900753612	0.268495	0.191757	0.00998228	0
ENSG00000102038.15	SMARCA1	3.11460102134582	0.85357730444062	0.000263386250591937	0.00989303302178566	18.17712	5.170949	1.5381	1.101043
ENSG00000140465.13	CYP1A1	5.36114899644087	1.4701849736444	0.000265752447495231	0.00996405285698131	0.0214118	13.306324248026	0.034129	0
ENSG00000170477.12	KRT4	5.49424972425517	1.50744274355882	0.000267653379433	0.0100174056777433	0.431114	13465.5054	0.812113	0.147328
ENSG00000139540.11	SLC39A5	-4.78475025917648	1.31301715096111	0.000268341432645438	0.0100252550567125	0.1295087	0.445371000634137	0.747746	45.273922
ENSG00000161243.8	FBXO27	2.90773194680576	0.798202041899926	0.000269633828873333	0.0100556146251889	7.074603	15.528577	2.065017	1.0661966
ENSG00000164520.11	RAET1E	5.09514402377485	1.3988606735425	0.000270157517186592	0.0100572493831506	0.2029273	37.201619	0.304861	0.0238016
ENSG00000253123.3	AC091182.1	3.93187974591017	1.07976287911989	0.000271129015000911	0.0100755195485888	1.313415	0.357987	0.0543215	0.0230669
ENSG00000136274.8	NACAD	3.41274288937663	0.937351149312924	0.000271752988488248	0.0100808334260623	2.47406	0.896795	0.0827923	0.184695
ENSG00000141338.13	ABCA8	3.9897030011023	1.09643021598493	0.000273899066724602	0.0101424921192243	49.0173381	4.53544586	0.712324	1.674056
ENSG00000172901.19	LVRN	4.69107046905104	1.28988409373003	0.000276029492346147	0.0102033547267776	12.4658020173766	0.1976771	0.08524293	0.1304163
ENSG00000100504.16	PYGL	3.63525963666256	0.999815967092507	0.000276980869111187	0.0102204965417278	151.22103	21.626124	4.524535	6.940457
ENSG00000112818.9	MEP1A	-4.70950448401925	1.29561170776892	0.000278017317991075	0.0102407117184094	0.0350456	0.0882933	0.193901	8.49615
ENSG00000125740.13	FOSB	4.42554829331306	1.21826703911174	0.000280516002049073	0.0103146226086781	1005.662790237	41.27757	26.1542290195106	4.13990300037795
ENSG00000236915.2	AL356270.1	4.36171272979217	1.20198540561348	0.000284789355594285	0.0104534152432585	0.379629	1.885372	0.0215632	0.0365662
ENSG00000172554.11	SNTG2	4.86509945910289	1.34121375260073	0.000286305555025783	0.0104906960275968	2.411607	0.281902	0	0.032546
ENSG00000049247.13	UTS2	-2.79299984145834	0.770475909733877	0.000288925654392501	0.0105682247651177	1.057016	1.790398	13.667	12.44447
ENSG00000182938.5	OTOP3	5.16355292475929	1.42559107004436	0.000292284911142808	0.0106597763359771	0.0203605	8.72575	0.0298832	0.0252944
ENSG00000121898.12	CPXM2	4.04372218879998	1.11646396193879	0.000292445793844498	0.0106597763359771	54.4874162	3.4876032	0.9797966	1.47694
ENSG00000145362.17	ANK2	4.41050561452916	1.21805210785041	0.000293523396190474	0.010680480661035	67.613416	2.34538088	0.4334475682561	1.370219963
ENSG00000164530.14	PI16	4.7309735858862	1.30725681281108	0.000295733865777912	0.0107422635924424	279.19664	3.983949	0.728921	3.58469
ENSG00000204764.13	RANBP17	-3.05650263346319	0.844769027221987	0.000296714278087022	0.0107592293329168	0.52425209398578	0.7351457	11.9355137	3.4896621
ENSG00000169245.5	CXCL10	-2.82950482594863	0.782363829203264	0.000298486538280638	0.0107730844977483	8.08911	20.1513	128.644	138.542
ENSG00000149591.16	TAGLN	2.78407028146014	0.76987263878563	0.000298874206166714	0.0107730844977483	661.77734	305.379929	59.978806	81.04633
ENSG00000173432.11	SAA1	4.99135174826675	1.3801843022661	0.000298684155492408	0.0107730844977483	7226.025	59.24344	72.75925	3.443722
ENSG00000133083.14	DCLK1	4.29326430343418	1.18728574999227	0.000299152401244787	0.0107730844977483	18.605183785	0.912769	0.14897281	0.4426512
ENSG00000105641.3	SLC5A5	5.08418632499251	1.4074090047188	0.000303324533854081	0.0109045950343871	0.0559147	29.03003	0.196672	0.0238589
ENSG00000141314.12	RHBDL3	3.54027406538704	0.980408321561651	0.00030499512888018	0.0109458782640406	1.912678	0.445034	0.0999152	0.0754652
ENSG00000166532.15	RIMKLB	2.59256654838383	0.718118083881034	0.000305933660229344	0.0109607924525587	22.116305322927	14.88154	2.702393345	3.6337640614026
ENSG00000104044.15	OCA2	5.07630602716742	1.40646829250703	0.000307074854321602	0.0109829042179632	0.049349	2.0396	0	0.0140408
ENSG00000185518.11	SV2B	3.46207426479998	0.959506761908551	0.000308351103101033	0.0110097628107232	1.3148994994	0.3217851834	0.08560441056	0.0519425931
ENSG00000204613.10	TRIM10	-3.86978569772966	1.07333763534804	0.000311701357447216	0.0111092275919344	0.0336128	0.14202559295	4.056784	0.799066
ENSG00000163884.3	KLF15	3.14955551893637	0.87367197959624	0.000312196910713744	0.0111092275919344	3.29747	1.73581	0.419916	0.152638
ENSG00000166292.11	TMEM100	3.84124050103257	1.06584824881015	0.000313443745819619	0.0111158502007333	24.491564	3.1480111	0.430322	1.00035301777
ENSG00000187862.11	TTC24	-3.70416861481811	1.0277353347395	0.000313110109965367	0.0111158502007333	0.3072112	0.711703	3.597608	17.1548130007484
ENSG00000185652.11	NTF3	3.66537547598825	1.01811703804866	0.000318031951588868	0.0112405255874386	1.3524491	4.407359	0.293519	0.106216
ENSG00000237988.5	OR2I1P	-4.07396367136327	1.13150878006949	0.00031764220461734	0.0112405255874386	0.259722	5.15155	88.9534	87.7335574
ENSG00000261625.1	AP003071.4	4.54726338987037	1.26323892742317	0.000318601761058382	0.0112417075926307	2.86293	0.366366	0.0439567	0.0371001
ENSG00000173175.14	ADCY5	3.58685141349888	0.997202819338137	0.000322016587352852	0.0113431019400478	14.469897	2.2309864	0.454951	0.689794
ENSG00000153707.16	PTPRD	3.17598395895878	0.883661308738944	0.000325490972832598	0.0114462505026819	1.30106725742561	0.45862212931891	0.076617	0.1023251
ENSG00000184347.14	SLIT3	3.91038899016763	1.08887601901826	0.000329138696395869	0.0115551389242228	40.3946155	2.881931	1.0664901	1.089121
ENSG00000166828.2	SCNN1G	5.36312309569476	1.49507041409591	0.000334242373069113	0.0117146921357116	0.0142698	3.35285	0	0
ENSG00000117560.7	FASLG	-3.4766906416406	0.969816526077088	0.000337213543012844	0.011799096240411	0.669828	0.869198	4.42086	20.318043
ENSG00000105374.9	NKG7	-3.6741038249266	1.02520766988788	0.000338676236825233	0.0118305254127001	20.053216	15.75312	83.17494	612.138169
ENSG00000276966.2	HIST1H4E	-4.1790663339508	1.16636639980924	0.00033969790759873	0.0118464699590046	0	0.154187	4.65986	1.813
ENSG00000143502.14	SUSD4	4.44063401179702	1.2404388244523	0.000343739439052424	0.0119674998390361	1.006168	47.7166130307838	0.8880945	0.414867
ENSG00000211965.4	IGHV3-49	-4.91208699333118	1.37315424865907	0.000347256134902847	0.0120499028666039	1.53933	12.5751	10.9363	1620.65
ENSG00000196136.17	SERPINA3	2.68658537983348	0.750949599671101	0.000346784602130981	0.0120499028666039	41.56801	38.3249617	9.8460981	3.608959
ENSG00000108551.4	RASD1	4.79803076201187	1.34153277409527	0.000348186813975981	0.012062227163839	246.88194	1.43673	2.98345	0.65074
ENSG00000132164.9	SLC6A11	4.41737571554427	1.23652440304607	0.000353707157323713	0.0122332480368774	0.1467496	5.065491	0.076166	0.0590019
ENSG00000185818.7	NAT8L	4.97145504262282	1.3922245909578	0.000355795495133188	0.0122448567857085	25.16391	0.0515855	0.0617595	0.1575063
ENSG00000146122.16	DAAM2	3.34781255477411	0.93739986008065	0.000355103154281749	0.0122448567857085	13.325751441	4.027629	1.29884830324643	0.340628296
ENSG00000164107.8	HAND2	3.73959395536346	1.04713471573491	0.000355263300050379	0.0122448567857085	3.226555	0.830014	0.1256826	0.1050391
ENSG00000161055.3	SCGB3A1	5.08682347908181	1.42507678053963	0.000357651807256707	0.0122885643086776	0.433615	50.968242	0.3014217	0
ENSG00000267978.5	MAGEA9B	-5.15245755269821	1.44378840378428	0.00035874757086503	0.012306039832668	0.0291814	0	0.0591686	8.063046
ENSG00000116711.9	PLA2G4A	2.6375694485953	0.73966697021788	0.00036262645678434	0.0124187710910833	12.0087	6.53087	2.02233	1.15908
ENSG00000166960.16	CCDC178	4.76188756077438	1.3366275974554	0.000367181034816566	0.0125542370452209	3.182548	0.4845157	0.0584543	0
ENSG00000196482.16	ESRRG	4.51856865222395	1.27117745276592	0.000378507779436805	0.0129204308619153	0.075623643120069	0.618450115523977	0.0094877846	0.008064203739782
ENSG00000205488.8	CALML3-AS1	4.90896848666176	1.38262232055578	0.000384534011044087	0.0130835200283653	0.098104	4.11019796	0.0437802	0
ENSG00000186474.15	KLK12	5.10560511028098	1.43795536480213	0.000384353284097861	0.0130835200283653	0.0484455	81.08659	0.32219699	0.137503
ENSG00000129194.7	SOX15	4.23549883922488	1.19400326795297	0.000389187461578591	0.0131989967754461	1.981371	61.17602	1.000154	1.067512
ENSG00000113722.16	CDX1	-5.05212078367554	1.42417309980454	0.000389043947518426	0.0131989967754461	0.0823	0.382117	0.125019	85.8257
ENSG00000123610.4	TNFAIP6	4.97355960540413	1.40385138191648	0.000395908252999294	0.0134052359848339	528.9632	0.518888	2.80067	1.77468
ENSG00000225883.2	BMS1P11	4.58227500509943	1.29415784138806	0.000399008232057392	0.0134884089285337	1.06286	1.9933	0	0.0293141
ENSG00000095970.16	TREM2	-3.178503159038	0.898001339043847	0.000400839397448365	0.0135284910323998	3.784371	1.83733	18.547028	51.557386
ENSG00000106278.11	PTPRZ1	4.29555421465646	1.21419006682394	0.000403484864428498	0.013595883076458	0.4861302	15.729567	0.3092416	0.1839702
ENSG00000165973.18	NELL1	4.71986631334489	1.33451974049905	0.000405078752609124	0.0136276815023028	1.0879770927665	0.1655939	0.0215829	0
ENSG00000147100.10	SLC16A2	3.50650311606621	0.99171689218397	0.000406557047672962	0.0136554954522077	17.31098	2.4464834	0.764657	0.730708
ENSG00000197410.13	DCHS2	4.3313467613512	1.22636402685558	0.000412646855677724	0.0138378647170391	0.0457	0.1481086	0.00460675	0.00238083
ENSG00000186642.15	PDE2A	3.14655872919515	0.891359019765886	0.000415451504118456	0.0139096614613718	21.311905	5.26163232762	1.441209	1.386308
ENSG00000173376.13	NDNF	3.28269382927285	0.930134209506111	0.000416709326351065	0.0139295227607528	1.65143	1.91802	0.284444209992	0.0749849
ENSG00000255404.1	AP001266.1	-5.06286844775185	1.43550631847909	0.000420476314334773	0.0140330622167874	0	0	0.990979	1.83825
ENSG00000233999.3	IGKV3OR2-268	-5.16857114715513	1.46587579091742	0.000422003146195481	0.014061627887299	0	0.259269	0.312548	102.469
ENSG00000130720.12	FIBCD1	-3.91822721157462	1.11165965106841	0.000424019590566174	0.0141063914264705	0.145466	0.035382	4.4283514	0.8037473
ENSG00000011465.16	DCN	3.81635211672283	1.08307808085054	0.000425699431966889	0.0141174594851171	2486.736874	179.484488	85.8780407	61.0626144
ENSG00000257607.1	AC073957.2	3.35567639671894	0.952310868161939	0.00042553443796065	0.0141174594851171	5.77056	1.71212	0.477631	0.19848
ENSG00000109321.10	AREG	2.27280969587531	0.64512266108094	0.000426585159319751	0.0141244839718525	35.820206	38.68526	9.957956	7.045495
ENSG00000131016.16	AKAP12	4.17848575629946	1.1862182325961	0.000427453493119223	0.0141309112969808	66.91918	2.03502700533992	1.32095600097205	1.115727268432
ENSG00000136244.11	IL6	4.88176178716166	1.38632034646197	0.000429305704175463	0.0141475129776942	571.285682	0.882122007	3.355948	2.6077090961966
ENSG00000241158.6	ADAMTS9-AS1	4.56830700316127	1.29727593918113	0.000429175321805613	0.0141475129776942	35.119548	1.1699921	0.722488	0.0626362
ENSG00000183542.5	KLRC4	-4.09552311249943	1.16394371097675	0.000433730872408315	0.0142709032257549	0.189529	0.0920718	1.28438	7.37558
ENSG00000150594.6	ADRA2A	4.00342402259218	1.13809007087662	0.000435355233538653	0.0143018970842267	41.3513	2.15584	0.802615	1.06795
ENSG00000133710.15	SPINK5	4.96513416860561	1.41222694047916	0.000438399912279586	0.0143793799084004	0.511202	581.824773	1.810468	2.8429595
ENSG00000153902.13	LGI4	3.01981388517478	0.859170674656634	0.000440083748058989	0.0143827161380544	12.893397	4.067287	0.9688092	1.04815221
ENSG00000196972.8	SMIM10L2B	3.51847376201174	1.00136224325163	0.000441932782714207	0.0143827161380544	0.59491	1.67094	0.130952	0.0476132
ENSG00000197561.6	ELANE	4.36925460816486	1.24335445798444	0.000441269771968482	0.0143827161380544	3.32173	0.663186	0.0663917	0.0557887
ENSG00000280165.1	PCDH20	5.15371888780671	1.46616347901151	0.000439579797523363	0.0143827161380544	0.0412523	0.6053	0	0
ENSG00000141622.13	RNF165	3.94572270355808	1.12286400690678	0.000441444508796484	0.0143827161380544	0.303786	2.120201	0.0203839	0.0857893
ENSG00000211967.3	IGHV3-53	-5.16258065128675	1.47088565420341	0.00044836798761862	0.0145695265930212	3.64805	1.35563	0.314154	1833.96
ENSG00000179841.8	AKAP5	-3.3548158100845	0.956016554633289	0.000449523054000878	0.0145844484346817	0.259162	0.27068	1.40166	6.2851177
ENSG00000143845.14	ETNK2	3.61218994296389	1.0298756356441	0.00045250155935432	0.014658392863226	2.3994177	11.944257	0.249903	0.6670199
ENSG00000006128.11	TAC1	5.26212852240386	1.50055960305571	0.000453568380941782	0.014670277308887	13.675978	0.0513217	0	0
ENSG00000168032.9	ENTPD3	3.99607446212485	1.13997532314339	0.000455914279379458	0.0147234320208229	2.07117	7.096265	0.416762	0.0275982
ENSG00000128849.10	CGNL1	2.54451573812311	0.726170415086464	0.000458290747179867	0.0147774088771428	2.17207	1.445187	0.303492	0.344146
ENSG00000170899.10	GSTA4	3.02547770906686	0.864468483650381	0.000465585311104828	0.0149851342825665	20.063598	74.006925	6.407368	4.948091
ENSG00000165621.8	OXGR1	5.10285316817427	1.45817380790907	0.000466162868086901	0.0149851342825665	0.15827	1.092864	0	0
ENSG00000055813.5	CCDC85A	3.90764061022032	1.11689230796378	0.000467580196100975	0.01500767738144	1.17376	0.210234	0.0391621	0.0240342
ENSG00000119927.13	GPAM	4.37725862343846	1.25150324518807	0.000469463445747867	0.0150450831183938	129.469379	1.9032126	1.861773	1.5983998
ENSG00000231752.6	EMBP1	-2.94866302665918	0.843408576258993	0.000472064948557442	0.015105357643993	0.138465	0.1387373	1.691256	1.244491
ENSG00000081181.7	ARG2	2.89431890503387	0.828383762674327	0.000475957137180906	0.0152066854240467	4.289598	7.572587	1.211420869	0.455266
ENSG00000163508.12	EOMES	-3.82440807410813	1.09489265317695	0.000477711403294577	0.015239502742239	0.3538049	0.756641	2.497152	23.62398
ENSG00000174099.11	MSRB3	3.38024094279531	0.967874846654842	0.000478636308069324	0.0152458030103723	32.4467701	5.139312289	2.017697	1.24086
ENSG00000113070.7	HBEGF	2.88980356665613	0.827738495093146	0.000480849772988481	0.0152930658453195	132.46602	104.524231	26.836282	6.88399
ENSG00000248290.1	TNXA	4.61858624523652	1.32336726878946	0.000482973460645429	0.0153373344873751	12.257	0.12902	0.0740674	0.130343
ENSG00000176134.5	AL445665.1	4.62818062575789	1.32664260099158	0.000485481526397317	0.0153704037942015	1.753638	0.167576	0	0.0323908
ENSG00000149809.14	TM7SF2	2.22701592059296	0.638331316513019	0.00048517803830304	0.0153704037942015	39.435998	36.588054	10.2993708105	7.590481
ENSG00000077782.20	FGFR1	3.89658742308669	1.11788934937771	0.000490915948643136	0.0155190156374231	238.755044412568	14.14348069	5.24126947317	6.9181509540599
ENSG00000175445.15	LPL	4.97508838501027	1.42801046977052	0.000494108869030958	0.0155964273885841	642.655259	0.317748	2.85916	1.822712
ENSG00000101230.5	ISM1	3.76059883176016	1.07985940477958	0.000496775057478721	0.0156334961406855	6.7792	0.761656	0.158694	0.252378
ENSG00000146070.16	PLA2G7	-2.89362515254047	0.830884279699651	0.00049659748927331	0.0156334961406855	5.96698	2.025505	35.0097	44.7834
ENSG00000079112.9	CDH17	-4.3873264342574	1.26005193022016	0.000497940972352014	0.0156466939123326	0.12747309	0.600842	1.08612	34.325221
ENSG00000120471.15	TP53AIP1	4.81335130866673	1.38279660118492	0.000499766272636642	0.015680540880526	0.0772535	28.974481	0.2724787	0.0662512
ENSG00000135424.16	ITGA7	4.17300462342389	1.1996411830754	0.000504145690604397	0.0157844873899705	268.141811	7.1684576	4.91170132	4.588698
ENSG00000164129.11	NPY5R	5.18212577815217	1.48983999094138	0.00050458545499691	0.0157844873899705	3.375912	0.0482741	0	0
ENSG00000168062.9	BATF2	-2.80440857347418	0.806447148288305	0.000506139702857426	0.0158095112253186	2.092074	5.873516	37.392535	37.67119
ENSG00000115252.18	PDE1A	2.79315987159256	0.803413622603973	0.000507786361124161	0.0158373427720257	6.96178	3.3416385	1.0547924	0.496124
ENSG00000079435.9	LIPE	4.56146793007742	1.3128520151034	0.000511859253385362	0.0159406509534975	734.125	4.9177889	9.955574	4.582009
ENSG00000166535.19	A2ML1	5.1549998255202	1.48448478357492	0.000515471451083683	0.0160096460209367	0.0501943	254.08093	0.6521692	0.0553058
ENSG00000187824.8	TMEM220	2.48881139396324	0.716716841600622	0.000515602417297211	0.0160096460209367	11.848414	9.798876	2.759163	1.423425
ENSG00000137285.9	TUBB2B	2.93423973364538	0.845173216760039	0.000517055707308788	0.0160246133736606	18.407941	7.53054	2.523683	0.965313
ENSG00000105894.11	PTN	3.42958147839912	0.987932964169985	0.000517613591009507	0.0160246133736606	8.85953	58.59517	3.66717	1.96344
ENSG00000240065.7	PSMB9	-2.58331474404046	0.746244874110686	0.000536671277588121	0.0165901081223738	54.034356	84.218819	793.29126	332.019272
ENSG00000169418.9	NPR1	4.28995594177625	1.23953240116772	0.000538278780366076	0.0166152944885016	83.495572	1.53031	1.668022	0.865567
ENSG00000163209.14	SPRR3	5.18808737777977	1.49935703329186	0.000539758045434209	0.0166343163471061	4.97684	9645.606	16.245704	0.189907
ENSG00000104415.14	WISP1	-2.5412652251712	0.734502192355108	0.000540482343259664	0.0166343163471061	0.321727	0.5410146	3.240542	3.25329
ENSG00000119938.8	PPP1R3C	3.751781164937	1.08496003721958	0.000544221201137314	0.0167248272062125	4.42335	24.0239	1.5525	0.225215
ENSG00000118596.11	SLC16A7	2.92144362650415	0.845013965332456	0.0005456725646743	0.0167448774275383	11.9163128	3.7246429	0.8997068	1.097951
ENSG00000123364.4	HOXC13	-4.79029649979206	1.38603059390959	0.000547998908107739	0.0167916799927341	0	0.0356531	0.106794	3.71267
ENSG00000140519.13	RHCG	5.15101594908711	1.49296263835237	0.000560176590770015	0.0171397681254726	0.6443798	2275.150895	5.1438014	0.1588643
ENSG00000261222.2	AC064805.1	4.82335871769413	1.39835873734783	0.000562042015659118	0.0171717763938768	1.418126	0.1229131	0	0.0122299
ENSG00000145335.15	SNCA	2.60702528626367	0.756122456386033	0.000564988980146702	0.0172366870959166	7.24911	5.625479	1.3749156	0.8614333
ENSG00000143536.7	CRNN	5.20976067740128	1.51222971979067	0.000570878789270931	0.0173910589307114	0.276807	1532.31	0.977401	0.023647
ENSG00000213694.4	S1PR3	3.87889170451818	1.12639750006688	0.000573969101629724	0.0174345194218223	51.2936888572472	3.0303398177725	1.01668210022897	1.578841203354
ENSG00000065320.8	NTN1	3.20865412783273	0.931667609715692	0.000573196454662137	0.0174345194218223	4.26785	10.2902	1.28462	0.273048
ENSG00000163873.9	GRIK3	4.08535069318298	1.18722970357443	0.000579400256900577	0.0175599311876013	0.206993	0.2289955	0.0159626	0
ENSG00000268606.5	MAGEA2	-5.04736030472865	1.46703687983364	0.000580611303640809	0.0175599311876013	0.0322068	0	0.0325335	10.20601227691
ENSG00000225746.11	MEG8	4.08670041805787	1.18771681781358	0.000579989148402078	0.0175599311876013	22.0843531	1.4623489	0.2711173	0.6297394
ENSG00000259347.6	AC087482.1	4.70512969500911	1.36893918647756	0.00058805964933816	0.017759570879652	6.173128	0.0532875	0.0638459	0.0180457
ENSG00000179750.15	APOBEC3B	-3.46494222253918	1.00971081424982	0.000599991129412363	0.0180678363237841	0.358757	0.695118	17.687261	2.4690451
ENSG00000173114.12	LRRN3	3.04469776530289	0.887236582539571	0.000599890479252968	0.0180678363237841	1.7027306	0.8954642	0.229052	0.0850931
ENSG00000136155.16	SCEL	4.9877555680615	1.45379460373259	0.000601686573203453	0.0180928965391265	0.0655018708	161.917332	0.8557784	0.125147
ENSG00000147394.18	ZNF185	4.18733499338735	1.22116562762797	0.000605886198753637	0.0181930785668732	2.90250640026801	131.17410009	2.11292000366099	2.30231800013533
ENSG00000106018.13	VIPR2	3.49777801719362	1.02020103730652	0.000606885419529965	0.0181970121715716	2.4117243	0.5415056	0.0737355	0.1373528
ENSG00000151726.13	ACSL1	3.63481050374728	1.06052151055337	0.000609434980666099	0.018247353942544	521.333359	46.5155489	15.913857347	20.0765655
ENSG00000092295.11	TGM1	4.63143455493792	1.35181568662185	0.000612350207784312	0.0183084850284613	1.15948700078565	350.37086	3.46384	2.1747
ENSG00000120659.14	TNFSF11	-3.37052240597416	0.984393403935698	0.000617159887983556	0.0184260029804093	0.075768	0.41640200195465	3.8757762	4.651805063
ENSG00000197696.9	NMB	3.71629368122934	1.08622419141724	0.00062323629855775	0.0185809524629757	42.93991	4.080839	1.003136	1.687629
ENSG00000165495.15	PKNOX2	3.65966200417634	1.06985997057207	0.000624619073930798	0.0185909718236802	2.7291144	0.4624902	0.0679995	0.12399200714623
ENSG00000069020.18	MAST4	2.20537717137532	0.644776240350903	0.000625346397046353	0.0185909718236802	16.0856875	17.89247	3.9080052	4.0725498
ENSG00000224287.2	MSL3P1	-2.39602577078346	0.700664530885175	0.000627023094388814	0.0186144150641574	0.797402	0.941604	6.812795	5.050266
ENSG00000259605.3	AC074212.1	-2.55306874539686	0.746924923893746	0.000630584868072027	0.0186936750352498	2.140321	4.020098	21.63962	25.09018
ENSG00000144063.3	MALL	3.59912636230918	1.05365345853092	0.000635823309861918	0.0188223456940621	18.9195	198.79733	6.49791	7.9354
ENSG00000140254.12	DUOXA1	4.60780610541998	1.34913027231814	0.000636907371797859	0.0188278442955026	0.683691	96.991474	1.48395	0.228205
ENSG00000147570.9	DNAJC5B	-3.51329654872412	1.03026681328802	0.000649428340948501	0.0191709416872389	0.1910261	0.4810124	3.21928	9.1205993
ENSG00000176293.19	ZNF135	2.77213843503788	0.813654732745745	0.000656761701765627	0.0193479189725608	1.2623021	1.208315	0.151157	0.20481619163
ENSG00000265190.6	ANXA8	4.94632882201914	1.45189474590369	0.000657269827208516	0.0193479189725608	0.14071	152.7583874	0.935656	0.0544959
ENSG00000171385.9	KCND3	3.1817213161275	0.934317821698867	0.000660683947738458	0.0193668179869236	5.348075	2.254339	0.1702711	0.5559555
ENSG00000278948.1	AL031587.5	2.47456466426839	0.726595990574801	0.000659957531694912	0.0193668179869236	8.3954	7.92782	2.18524	1.01656
ENSG00000272259.5	LINC01749	-5.05460540888135	1.48420850597392	0.000660212867716145	0.0193668179869236	0	0	1.983479	0.0376613
ENSG00000174226.8	SNX31	4.47192266809123	1.31365272140975	0.000663607229004347	0.0194212160750686	0.20570595	8.45173	0.13978855	0.0377606
ENSG00000152583.12	SPARCL1	3.1491895648164	0.92518019305083	0.000664392954140188	0.0194212160750686	329.517106	65.39492	27.016305	15.300085
ENSG00000279399.1	AL356095.2	4.41741583380837	1.29816932033763	0.000666980944309667	0.0194697125512344	3.9484	3.38459	0.146469	0
ENSG00000167550.10	RHEBL1	-2.70244917764336	0.794279067201166	0.000667986172217964	0.0194719362774914	0.465378	0.589995	5.2393459587	4.097559
ENSG00000172382.9	PRSS27	4.5113877515736	1.32707960081724	0.000675127796791909	0.019625524955564	0.6987807	126.08106	1.6179471	0.8784566
ENSG00000134259.3	NGF	4.82348806402636	1.41882434045992	0.000674753083959829	0.019625524955564	28.1045	0.328603	0	0.237267
ENSG00000177103.13	DSCAML1	3.96215164105315	1.16623440326158	0.000680322441233356	0.0197491385676037	0.409038323	0.107348	0.00803209	0.0120279
ENSG00000115963.13	RND3	2.21607715608823	0.652370351289196	0.000681384807618051	0.019752619893315	92.453851	85.869061	26.898138	15.784707
ENSG00000158089.14	GALNT14	3.55457915241571	1.04697424743845	0.000686042837776799	0.019860182095254	1.2366488	8.1701158	0.3417343	0.311763
ENSG00000038295.7	TLL1	3.33155484903709	0.981475051465871	0.000687699578106075	0.01988068338969	2.1761982	0.407425	0.1167315	0.105236
ENSG00000085741.12	WNT11	4.96617070961715	1.46363746791498	0.000691232274612424	0.0199552854595066	61.34359	0.273086	0	0.279177
ENSG00000104213.12	PDGFRL	4.56437073768074	1.34562380734338	0.000693816582262198	0.0200023407807887	56.881421	0.4894678	0.9499258	0.11828471
ENSG00000171401.14	KRT13	5.12570420476936	1.51194619258448	0.000698577914860977	0.0200989323509965	2.345623	25496.495702	25.191539	0.8545273
ENSG00000164946.19	FREM1	4.56149308221002	1.34559788925422	0.000699084960345265	0.0200989323509965	11.3993180149921	0.3917833	0.00799545	0.1765054
ENSG00000162747.10	FCGR3B	3.65077892657712	1.07707662036981	0.000700136360191658	0.0201015862647356	37.9278550005842	3.33408000023594	1.424421	1.139699
ENSG00000272693.4	AC073107.1	-4.21242790070577	1.24317646360232	0.000702916026851527	0.0201537852349948	0.0267412	0.0450053	2.669475	0.545181
ENSG00000271880.1	AGAP11	4.00103349189155	1.18131404011213	0.00070678213112107	0.0202369490248176	13.2328	0.710072	0.483286	0.118269
ENSG00000129244.8	ATP1B2	3.52956994770753	1.0440807977653	0.000723402546079514	0.0206845756661399	4.58543	0.670646	0.144589	0.218192
ENSG00000157445.14	CACNA2D3	3.02587648908916	0.895368347091053	0.000726239564310689	0.0207091905148132	1.1545594	1.7129286	0.2058558	0.1433252
ENSG00000278828.1	HIST1H3H	-3.26513887648028	0.966147333772871	0.000726057875682019	0.0207091905148132	0.362663	1.11083	18.3394	4.65335
ENSG00000211896.7	IGHG1	-4.16874645026454	1.2340911738658	0.000730179928479991	0.0207932623926795	175.421058	889.858768	1627.956463	38867.80334
ENSG00000211946.3	IGHV3-20	-4.61900026013044	1.36757632661855	0.000731457716227808	0.0208013870751949	0	1.00616	3.0245	80.8754
ENSG00000211665.3	IGLV3-16	-5.00454935773962	1.48236786942853	0.000735343177915034	0.020883546972793	0.489058	0	0.259012	167.825
ENSG00000228705.1	LINC00659	-4.43571594530152	1.3140288918418	0.000736386206261264	0.0208848694141134	0	0.117781	6.67662	1.88246
ENSG00000143631.10	FLG	3.77826302862717	1.11991916452571	0.000741671339533462	0.0210063373044349	0.0602485	0.205718	0.00754755	0.00642285
ENSG00000234906.9	APOC2	-4.073747922227	1.2078189579987	0.000744043677988173	0.021030117505964	0.0689214	2.49702	31.14419	60.720871
ENSG00000165966.15	PDZRN4	3.57767327736167	1.06087899953675	0.00074525083654597	0.021030117505964	0.391559	0.5734344	0.0342469	0.0290638
ENSG00000261888.1	AC144831.1	3.10223508899016	0.919925678306228	0.000745521127292869	0.021030117505964	12.1361	2.67795	0.966317	0.672155
ENSG00000168928.12	CTRB2	3.88650016362786	1.15314892922844	0.00075076387418416	0.0211495430632067	0.880717	3.1314198	0.0463812	0.130827432899
ENSG00000186684.12	CYP27C1	2.86835756620856	0.851224080518263	0.000752539800080084	0.0211711163354074	0.674238	0.796205	0.100441	0.09588
ENSG00000176490.4	DIRAS1	3.11883454895007	0.925701190339124	0.000753979058532519	0.0211831730399237	0.907465	1.54777	0.0735594	0.174881
ENSG00000111341.9	MGP	4.02949534457766	1.19704105629961	0.000762077968097808	0.0213820510486773	2871.991323	82.200866	49.3775	64.50597
ENSG00000181392.15	SYNE4	-3.31516649790392	0.985480193264123	0.000768184002168301	0.0215245568201142	0.39803	2.27973146004	15.080139	24.999809
ENSG00000243766.8	HOTTIP	-4.95726798312166	1.47430036515774	0.000772528398342273	0.0215885636011409	0	0	0.1277389	1.570173
ENSG00000130558.19	OLFM1	2.98949070649782	0.889042900785239	0.000772137125018094	0.0215885636011409	21.201579	5.789858	2.223842	1.14251286
ENSG00000109814.11	UGDH	3.42291702519036	1.01821842987414	0.000774719136423488	0.0216209565649799	191.801135	21.487203	9.034339	7.889469
ENSG00000187922.13	LCN10	4.25532702051679	1.26669617642428	0.000781146191796113	0.0217713338216153	9.047428	2.813502	0	0.305643
ENSG00000129596.4	CDO1	4.58585942949721	1.36539278839878	0.000783277410309752	0.0218017413581436	49.349867	0.3365497	0.0859064	0.606112
ENSG00000101335.9	MYL9	2.69386341730141	0.802349561137455	0.000786596915740697	0.0218650991472271	600.887	204.7974	70.32904	56.8781
ENSG00000215386.12	MIR99AHG	3.14711836136988	0.937849752101219	0.000791717333000667	0.0219782828905443	24.6143115	10.565295367	0.8369768	2.5899794
ENSG00000162520.14	SYNC	3.06668713803241	0.914093821217697	0.000793956327303276	0.022011283947023	4.4727	2.277674	0.6436597	0.1691703
ENSG00000136689.18	IL1RN	3.70352371057409	1.10481030255721	0.000801776847103273	0.0221143079254145	64.27316	606.85108	34.917909	7.095206
ENSG00000148180.19	GSN	3.31079930577472	0.987469384477681	0.000799949928576687	0.0221143079254145	1896.101687	263.793856	123.200097237764	72.302475
ENSG00000267272.5	LINC01140	4.00794181311103	1.1953581918115	0.00079963471553819	0.0221143079254145	54.7161928	1.75186030945892	0.9481106	1.2530575
ENSG00000145934.16	TENM2	3.96182476360749	1.18187906765734	0.00080189293493559	0.0221143079254145	0.0972823	1.9814697	0.05646	0.0349332
ENSG00000163083.5	INHBB	3.99395081681459	1.19221710390984	0.000808058053232052	0.0222168052614711	58.255	1.88543	1.75291	0.777526
ENSG00000143819.12	EPHX1	3.01264195585074	0.899358108653438	0.000808789656686981	0.0222168052614711	443.453549	97.447915	31.508089	31.915
ENSG00000260401.1	AP002761.4	3.8038449726135	1.13548110128629	0.000808158556023934	0.0222168052614711	1.32857	21.2242	0.900347	0.331247
ENSG00000164619.9	BMPER	4.17726748117044	1.24738738427833	0.000811584602213449	0.0222644001018216	5.507717	0.483572600212493	0.0199791	0.1694284
ENSG00000108830.9	RND2	3.16018482841181	0.943987381622352	0.000814857061973968	0.0223249531528267	0.825198	0.662056	0.0360357	0.102047
ENSG00000174348.13	PODN	3.92721806741699	1.17414491175629	0.000823575595528511	0.022534361496974	135.317762	6.463788	1.68852	4.3001171
ENSG00000165124.17	SVEP1	3.99642535609821	1.19499727484716	0.00082491485824681	0.022538827068508	27.130055	0.89966722	0.3880105292152	0.70957391053319
ENSG00000166250.11	CLMP	3.66734571296457	1.09670444798132	0.000825889555256173	0.022538827068508	33.239452	2.31558	0.972783	1.14927
ENSG00000100557.9	CCDC198	-4.93794634676762	1.47761825777874	0.000832285605059229	0.0226838413477716	0	0.0958201	36.226923	0.0484226
ENSG00000196569.12	LAMA2	3.40813719126606	1.02112944057669	0.000845006702608439	0.0230006434804809	22.40192488	2.538489368	0.9832838	0.99722893
ENSG00000132554.19	RGS22	4.41713484094722	1.32358712530256	0.000846132507972063	0.0230014153496582	0.721005	0.271926	0	0.0200575
ENSG00000113396.12	SLC27A6	4.45180335884922	1.33467192232734	0.000851449694659215	0.0231159768787079	0.306552	4.13722	0	0.0657077
ENSG00000261115.5	TMEM178B	3.24141969116356	0.971972461575089	0.000853336373083531	0.0231372277405663	0.246314	0.439434	0.013721	0.0466971
ENSG00000006283.17	CACNA1G	4.14890017550791	1.24436898360147	0.00085563636117191	0.0231696156250673	1.099922908	0.0752958	0.0100865	0.0276062
ENSG00000178222.12	RNF212	3.3984530934906	1.01953947617379	0.000858156449261521	0.0232078722839641	6.048743	2.4909785	0.1611045	0.48094600104135
ENSG00000260597.1	AC012531.1	-3.89557584740869	1.16919736221735	0.000862745558736359	0.0233019125844785	0.0190172	0.0319516	1.14833	0.308475
ENSG00000162551.13	ALPL	3.24703361302255	0.974686966416193	0.000864226183011449	0.0233118617371132	23.76184	3.78279698604	1.350194	1.240229
ENSG00000255071.3	SAA2-SAA4	4.19844109822606	1.26100839380031	0.000870234599553156	0.0234437621748517	13.0747	2.75759	0.497697	0
ENSG00000186466.5	AQP7P1	4.90593581163012	1.47424981290223	0.000875501826704434	0.0235351696709342	2.32691	0.296272	0	0
ENSG00000181104.6	F2R	-2.24301571135139	0.674057534571704	0.000875873483626541	0.0235351696709342	4.48382	3.18433	21.833037	23.548134
ENSG00000214435.7	AS3MT	3.09085383254887	0.929240187287099	0.000880335935522784	0.0236247898497081	5.906911	2.006255	0.280066	0.555026
ENSG00000128274.16	A4GALT	2.44750773211322	0.736049055588576	0.000883562436178111	0.0236810551149067	31.141709	16.813823	6.0843591743	3.409239
ENSG00000256084.1	AC092112.1	-4.84366573775376	1.45684548120825	0.00088493772014945	0.0236876241080617	0	0	4.26266	1.18407
ENSG00000170961.6	HAS2	4.33469581649501	1.30442213454361	0.000890301830600683	0.0238008113106629	57.193	0.416763	0.760462	0.625874
ENSG00000021826.15	CPS1	2.86968229218789	0.864292811357217	0.000899316198354682	0.0240111696832048	1.49975	2.880615	0.4342997	0.1866159
ENSG00000060558.3	GNA15	2.95528193988823	0.890203134117616	0.000900871871149462	0.0240221037499002	13.223257	53.80185	3.93099	4.33094
ENSG00000186810.7	CXCR3	-3.47906784431916	1.04887148018295	0.000910016817569124	0.0242138748554998	0.694317	2.567969	9.503136	47.10421
ENSG00000144820.7	ADGRG7	-4.01169677256175	1.20949182998841	0.00091040150691574	0.0242138748554998	0.0263096	0.2049357	0.822499	6.794201
ENSG00000249669.9	CARMN	2.12243923277546	0.639963801742497	0.000911529522448082	0.0242138748554998	14.6922035	16.2996979	4.204691	3.611549779126
ENSG00000003137.8	CYP26B1	3.58998392887553	1.08298069114624	0.000916725115741053	0.0242903182058366	21.73524	2.118871	1.2314783	0.399766
ENSG00000172201.11	ID4	2.43663566709828	0.73502954722896	0.000916374522806044	0.0242903182058366	23.111	13.956	5.00558	2.44103
ENSG00000233705.6	SLC26A4-AS1	4.13854615022883	1.24914125522093	0.000922636898135362	0.0244160943788119	0.1804693	0.44199186	0.0130271	0.0110648
ENSG00000072163.19	LIMS2	2.5594609865441	0.772655793039272	0.000924495822961417	0.0244344362590774	39.0706326	16.6733360013256	4.65304232048719	5.0375215
ENSG00000164687.10	FABP5	3.4146718345898	1.03114756903118	0.000927886653897134	0.0244820364761733	364.71699	2519.4805	66.721448	152.62341
ENSG00000204516.9	MICB	-2.47731744556555	0.748140241381583	0.000928632997688714	0.0244820364761733	1.70560500361765	2.477568	21.92062	9.62285
ENSG00000269855.2	RNF225	4.92263770324319	1.48769883247897	0.000936653001096769	0.024662450062798	0.178194	3.4736	0	0
ENSG00000131459.12	GFPT2	4.57958855345767	1.38441844288655	0.000939812079067758	0.0247145813866765	251.615644	0.794109	0.573982	2.79783
ENSG00000168874.12	ATOH8	2.5102333549428	0.759704033152005	0.000952392297893268	0.0250140227713597	4.8737750478994	3.9725566	0.7007044	0.8813434
ENSG00000198574.5	SH2D1B	-3.10155032553646	0.938819621141856	0.000954280521712304	0.0250250701856479	0.223293	0.187634	1.26706	3.599796
ENSG00000104723.20	TUSC3	2.23059242533933	0.675241432372186	0.000955200923160377	0.0250250701856479	12.98429	15.005095	4.096489	2.4964645
ENSG00000174482.10	LINGO2	-4.24969421155093	1.28691674708841	0.000959196166463114	0.0250983676066172	0	0.0427315	2.6407650032768	0.278842000460565
ENSG00000280339.1	AP001528.3	3.96859157043621	1.20194164863856	0.000960606627058618	0.0251039330380568	11.6372	0.389699	0.342284	0.171703
ENSG00000124615.19	MOCS1	3.30522841049955	1.0015390768187	0.000966334302623571	0.0251907968267257	26.054387	3.732639	1.8461968	0.860644
ENSG00000043039.6	BARX2	4.73191359836649	1.43375913729327	0.000965627271052868	0.0251907968267257	0.0584051	91.139103	0.6677203	0.224549
ENSG00000168334.8	XIRP1	4.56209530041426	1.38307272746486	0.000971953932987858	0.0253058167471957	11.352653	0.0330739	0.0594355	0.1008249
ENSG00000120049.19	KCNIP2	4.29227525320751	1.30250478950907	0.000982814152478171	0.0254935666111262	254.350536	1.9387623	4.1735883	2.3993001
ENSG00000115415.18	STAT1	-2.29103320740708	0.695151233099067	0.000981650877859465	0.0254935666111262	41.7609863928786	58.7183113	425.051946	218.565001
ENSG00000276600.4	RAB7B	2.40041132397571	0.728397189782166	0.000982570801769779	0.0254935666111262	13.52692	13.0900917	1.998219	3.194751
ENSG00000246363.2	LINC02458	4.9649526467106	1.50772499592822	0.000991211460212895	0.0256796056793598	2.13407	0.014452	0	0
ENSG00000109610.5	SOD3	3.2525419394366	0.988588331465911	0.00100156294596934	0.0259157503513227	220.641	29.7477	13.3866	10.0125
ENSG00000157654.17	PALM2-AKAP2	4.39328379506538	1.33575010905041	0.00100543572655441	0.0259838808789814	3.46528	0.370528	0.0895302	0
ENSG00000275395.5	FCGBP	4.37650127379911	1.3311090717489	0.00100951757968181	0.0260572400893485	0.440438	92.55021	0.96755	1.027197
ENSG00000145879.10	SPINK7	4.82590881514117	1.46890146703196	0.00101842622287441	0.0262548526509529	0.260443	93.219239	0.540713	0
ENSG00000147465.11	STAR	3.30075055929438	1.00491514663367	0.00102124988238834	0.0262953025613972	0.5483425	1.5014474	0.1127607	0.0732399
ENSG00000276386.1	CNTNAP3P2	4.79804633878524	1.46098669793768	0.00102303663057503	0.0263089874113154	0.178642	0.220868	0	0
ENSG00000264230.8	ANXA8L1	4.80857097121529	1.46546294535226	0.00103342925422712	0.0265436810531204	0.25838	154.07668	1.0332024	0.0240783
ENSG00000180644.7	PRF1	-2.88289869263196	0.878998636117945	0.00103897889127534	0.026653560076181	5.892471	3.72683792	23.223154	70.83244
ENSG00000113088.5	GZMK	-3.40449136984186	1.03878111170427	0.00104771351306833	0.0268447769198033	1.61321	3.48648	10.819057	70.76098
ENSG00000071967.11	CYBRD1	3.2894321982421	1.00390313248991	0.00105049091997146	0.0268830759361195	137.008655	18.292226	5.66047	7.8632659
ENSG00000164849.9	GPR146	3.31522787315696	1.01201622594016	0.00105339143743865	0.0269244282161911	9.298526	2.639775	0.260919	0.7209724
ENSG00000037965.5	HOXC8	-2.7138431714087	0.828936914817323	0.00106080208071868	0.027047872031366	0.362609	0.211301	3.32071	2.02544
ENSG00000198944.5	SOWAHA	-3.00075373429621	0.916548348742015	0.00106047076302392	0.027047872031366	0.0940196	0.3157	3.43463	1.53807
ENSG00000275437.1	AL121832.3	-3.14578678259292	0.961490219997051	0.00106871795095483	0.0272165972467343	0.053937	0.328104	2.8318	2.40498
ENSG00000168394.11	TAP1	-2.16971161697432	0.663364659518336	0.00107256023216928	0.0272812984296553	69.81342	96.34316	584.56	371.988
ENSG00000232133.1	IMPDH1P10	-4.14756523458118	1.26878002760323	0.00107951355218377	0.0274181914011568	0	0.0831756	0.655199	2.75351
ENSG00000104888.9	SLC17A7	3.86656391547482	1.182918096923	0.00108055852365836	0.0274181914011568	5.23734	0.3309724	0.0684443	0.174257
ENSG00000101224.17	CDC25B	-2.24880177061663	0.688605414375988	0.00109180948895234	0.0276701754279953	21.678922	27.204343	202.171691	101.189882329
ENSG00000188338.14	SLC38A3	3.94764983226709	1.21000073546109	0.0011042694961119	0.0279521550350354	0.373593	0.285185	0.0170802	0.0144953
ENSG00000136002.18	ARHGEF4	3.40100942653649	1.04298588266388	0.00111082949701507	0.0280842888153666	5.7778240004	22.346134452072	0.365723331	1.7234376316
ENSG00000083290.19	ULK2	2.39700513516388	0.735580488597771	0.00111940582013967	0.0282670199810931	7.143985	4.598567	0.956345	1.3443272
ENSG00000166770.10	ZNF667-AS1	2.85216096000536	0.875758223248786	0.00112679610203082	0.0284080816970312	17.2023548	5.30847	1.33232	1.635084
ENSG00000184809.12	B3GALT5-AS1	4.72325930933393	1.45038210735082	0.00112770284707906	0.0284080816970312	0.0539155	4.934253	0.0411653	0
ENSG00000268307.1	LINC02560	3.99029186575638	1.22596068458624	0.00113460829432509	0.028547725379063	1.42492	23.8442	0.561015	0.307681
ENSG00000165794.9	SLC39A2	4.59279635910407	1.41129991840834	0.00113671308459999	0.0285663903358887	0.221981	15.10606	0.201962	0
ENSG00000109906.13	ZBTB16	3.50924286290761	1.07867673213864	0.0011407900588556	0.0286073749657606	0.5710247	2.84384	0.1643316	0.07944677
ENSG00000227766.1	AL671277.1	-4.08885764717202	1.25686695774182	0.00114107378555159	0.0286073749657606	0.0604872	0.75968	35.0738	2.15112
ENSG00000267532.5	MIR497HG	3.42846305279434	1.05425896025665	0.00114591083240486	0.028694319159347	35.424557	3.783171	1.28032	1.650579
ENSG00000189013.14	KIR2DL4	-3.33690609360042	1.02632448947573	0.00114871765108262	0.028730278340144	0.13645	0.2323977079776	1.3794619	4.497639
ENSG00000106031.8	HOXA13	-4.76524342100084	1.46593140184202	0.00115137778790637	0.0287412235687975	0.009805451	0	0.00984256	2.0076421
ENSG00000133519.12	ZDHHC8P1	-3.77271934594363	1.16064715976629	0.00115189788624409	0.0287412235687975	0.111767	0.4399409	15.429316	0.9901766
ENSG00000119508.17	NR4A3	4.02884795674118	1.23991989261274	0.00115697189670442	0.0287650936927971	67.03717	1.178134	1.1774582	1.283172
ENSG00000189058.8	APOD	4.1357381229098	1.27269189787577	0.0011556790670622	0.0287650936927971	790.0850848	28.000043	2.56472	20.870038
ENSG00000083067.22	TRPM3	4.07341468566874	1.25339969357526	0.00115448503950213	0.0287650936927971	0.1840601	0.23083434	0	0.0100249
ENSG00000148671.13	ADIRF	3.76942874932597	1.16100870156105	0.0011675781571808	0.0289943964411759	1317.9475	55.23513	49.91003	23.19777
ENSG00000189350.12	TOGARAM2	-3.3557908892274	1.0341534207868	0.00117465365803943	0.0291355810873946	0.37760129	0.9562858	3.4944169	17.0391285
ENSG00000182463.15	TSHZ2	3.56759774028323	1.09954554061258	0.00117611099885559	0.0291372463652653	44.31179	4.225213	0.822584	2.1981155
ENSG00000163564.14	PYHIN1	-3.15931770875633	0.975377610243251	0.00119919554872882	0.0296740726160653	0.754734	1.866107	6.985634213114	26.4198912
ENSG00000089692.8	LAG3	-2.93794789032331	0.907381828531873	0.00120442655694278	0.0297349196983762	3.334509	6.551307	24.74587	77.84062
ENSG00000273032.2	DGCR9	-3.44547385808512	1.06432861936558	0.00120697156471331	0.0297349196983762	0.2348577	0.1728688	7.4026	0.694524
ENSG00000064195.7	DLX3	4.24264986173553	1.31061556295912	0.00120732938896503	0.0297349196983762	0.196333	2.44134	0.0754935	0.0167622
ENSG00000163331.11	DAPL1	4.91153874216803	1.51703906621833	0.00120547188339037	0.0297349196983762	0	353.18582	0.140377	0.335201
ENSG00000144857.14	BOC	2.85391438383601	0.881767999235168	0.0012097048968012	0.0297584564930239	25.8780662	21.6863750340466	1.3928847	4.6546707393
ENSG00000101115.12	SALL4	-4.21513764539275	1.30248567864485	0.00121121567703183	0.0297606909436227	0.0942859	0.3810268	0.354074	21.584634
ENSG00000241935.8	HOGA1	3.23189169606961	0.999498841526709	0.00122278114123182	0.029943192796924	2.3165231	0.8571381	0.2377241	0.0671208
ENSG00000135119.14	RNFT2	-2.47177961608096	0.764433811040725	0.00122292919672536	0.029943192796924	0.8165094	0.4748984	4.7958159	4.467609
ENSG00000262001.1	DLGAP1-AS2	-2.62403793140352	0.81148740338609	0.00122234064714862	0.029943192796924	1.594273	0.597892	9.69764	8.47179
ENSG00000185873.7	TMPRSS11B	4.88585476065802	1.51122606758867	0.0012248028838115	0.0299540765948718	0.133604	142.5164	0.327897	0
ENSG00000131386.18	GALNT15	3.18274619797226	0.984626670547294	0.00122738098591998	0.0299821422889241	6.927291	1.286422	0.369858	0.3998096
ENSG00000234076.1	TPRG1-AS1	4.34659765025197	1.34497248050208	0.00123040140847459	0.0300209349478683	3.1957	0.80273	0	0.0806901
ENSG00000237125.9	HAND2-AS1	3.85508838574796	1.19312097037867	0.0012331651789662	0.0300533825418053	2.4138187	0.571450187814129	0.1336932	0.0136786
ENSG00000218336.8	TENM3	3.3593159621092	1.04014898439093	0.00123942347944106	0.0301708207962894	2.3633763	0.6275892	0.0487004	0.1934497
ENSG00000163519.13	TRAT1	-2.96613931187551	0.918910492164498	0.00124708188499304	0.0302934538889568	0.370955	0.881071	4.059636	9.382607
ENSG00000157103.11	SLC6A1	3.5340220965826	1.09486169597092	0.00124735200659238	0.0302934538889568	0.7248574	7.678133873	0.2172344718	0.3363276727
ENSG00000085265.10	FCN1	3.86363202847834	1.19761939917135	0.00125492401596628	0.0304420745956449	69.97898	2.706244	0.9145228	2.215665
ENSG00000015413.9	DPEP1	-4.53563498017198	1.40663234541042	0.00126208842522601	0.0305804754963144	0.101459	0.1897605	0.0604922	25.68117
ENSG00000105509.10	HAS1	4.88984211769946	1.517304610045	0.0012698130547826	0.0307321152600328	122.1571	0	0.10074370806202	0.0882894
ENSG00000198807.12	PAX9	4.47089481323561	1.38771693935333	0.00127404562195647	0.030798987532394	0.0917795	28.731268	0.081686	0.343336
ENSG00000127954.12	STEAP4	3.5860918782011	1.1133144503662	0.0012770170266093	0.0307997696901085	27.806868	2.169678	1.555207	0.4540546
ENSG00000183918.16	SH2D1A	-3.28915692649717	1.02112088040516	0.00127688909655507	0.0307997696901085	0.712512	1.5816261	5.051332	28.0094102
ENSG00000181577.15	C6orf223	-4.22233626320558	1.31114531309368	0.00128037768793883	0.0308453286913906	0.0279161	0.1378997	9.432151	0.1417233
ENSG00000145536.15	ADAMTS16	4.67962257524243	1.4533066288929	0.00128198218358178	0.0308485242085999	11.103638	0.0130845	0.0892568	0.00842893
ENSG00000102302.7	FGD1	2.26203397161395	0.703039215781354	0.00129309632057407	0.0310802818611376	5.01599	4.66354	1.48914	0.741323
ENSG00000127083.7	OMD	3.74353363853753	1.16452382388565	0.00130604780647378	0.0312869530362995	8.36525	0.669562	0.105555	0.340127
ENSG00000106571.13	GLI3	2.6371328703067	0.820344510079823	0.00130596787310769	0.0312869530362995	3.426894	1.240916	0.402205	0.354836
ENSG00000112290.12	WASF1	2.36089647199426	0.734424750361239	0.00130617319083745	0.0312869530362995	6.580107	8.770983	2.256196	1.0291428
ENSG00000002746.14	HECW1	3.58162945231577	1.11455698781778	0.00131127563693825	0.0313733174367451	0.151924	0.4328942	0.01907529	0.0173277
ENSG00000107736.20	CDH23	3.62769813558421	1.1293540328506	0.00131727873435397	0.0314810091143954	17.770294	0.9698039	0.635853604083	0.50746518
ENSG00000107130.9	NCS1	2.06513319079946	0.643175862245139	0.00132348743240566	0.0315933634348408	11.58396	12.11618	3.171067	3.0193901
ENSG00000106211.8	HSPB1	2.80491829766698	0.873821997621513	0.0013276156393332	0.0316558545901985	794.15109	3183.3786	324.6827	240.81138
ENSG00000123405.13	NFE2	3.84629053033274	1.19925366535627	0.00134016614698718	0.0319187980394366	6.887944	0.353721	0.2067492	0.137991
ENSG00000105251.10	SHD	-3.65358052413895	1.14089970278639	0.0013630282432419	0.0324264573781009	0.123203	0.111798	1.477404	3.948185
ENSG00000147257.13	GPC3	4.34449506337083	1.35731405478125	0.00137045136793544	0.0325292074978018	61.4315600007715	0.6994084	1.2857892	0.0850133
ENSG00000183114.7	FAM43B	4.42580025067895	1.3826179502557	0.00136937716235496	0.0325292074978018	5.26847	0.150341	0	0.0848701
ENSG00000186407.6	CD300E	3.95514341429919	1.23613525641016	0.00137616487135235	0.0326278727813053	14.076021	0.359908	0.445406	0.146404
ENSG00000180660.7	MAB21L1	4.69854388840367	1.46892302530081	0.00138081403440208	0.0327011088667041	0.250228	0.238114	0	0
ENSG00000149256.15	TENM4	2.86452601843525	0.895893152920276	0.00138673958795331	0.032804373616155	1.534899	1.709753	0.0926355	0.3153754
ENSG00000203867.7	RBM20	3.59447091443894	1.12448612343262	0.00139083950086891	0.0328642673040715	0.292767	3.31253	0.0880248	0.126025
ENSG00000260581.1	AC011374.1	4.51566985286334	1.41326483962782	0.00139731902720824	0.0329801908685332	0.103307	2.26408	0	0.0294323
ENSG00000225187.1	AC073283.1	-3.96988350914238	1.24328270993514	0.00140770862114033	0.0331880371096515	0	0.120643	2.74	1.47827
ENSG00000223403.4	MEG9	4.29383743343156	1.34499605730562	0.00141069633542009	0.0332211061731119	16.35255	0.0812577	0.2645272	0.115605
ENSG00000165556.9	CDX2	-4.05526664479654	1.27132719626009	0.00142376262299037	0.0334750588997882	0.0245014	1.154924	9.67046	35.5277
ENSG00000163568.14	AIM2	-2.75101727158063	0.862494698259338	0.00142467448535765	0.0334750588997882	1.06248	3.82201	26.67493	19.5560000022288
ENSG00000072657.8	TRHDE	4.18184596513282	1.31154588946679	0.00143019837910023	0.0335672204116033	1.02146	0.111064	0	0.0267774
ENSG00000183876.8	ARSI	3.60670886810087	1.1313919669203	0.00143334439320365	0.0336034285650506	15.6313	0.882857	0.496679	0.503206
ENSG00000188505.4	NCCRP1	4.51174649810163	1.41549932326662	0.00143563716517494	0.0336195746870408	0.106005	155.406	1.25617	0.837588
ENSG00000161682.14	FAM171A2	3.00763512108436	0.943811545256292	0.00143910767860262	0.0336632341917772	1.14764	1.27001	0.24041	0.054419
ENSG00000132613.14	MTSS1L	2.25975071467891	0.709274736693078	0.00144253610556466	0.0336682786598325	16.71241	28.5521233	6.430553	3.911973
ENSG00000197614.10	MFAP5	3.94295869098281	1.23757044572799	0.00144230726951454	0.0336682786598325	242.561344	7.5765431	1.9277265	7.370126
ENSG00000161281.10	COX7A1	3.48257551350629	1.09356930140121	0.00144956638381586	0.0337571798204406	183.15851	13.213805	8.772671	5.336848
ENSG00000266265.3	KLF14	4.5800768917752	1.43813163843966	0.00144883580634815	0.0337571798204406	1.49675	0.0288935	0	0.0146855
ENSG00000011105.13	TSPAN9	2.26018301829132	0.710258785009266	0.00146162616671877	0.0340002473121628	18.729072	10.155981	3.771548	2.742934
ENSG00000204963.5	PCDHA7	-4.67230169872642	1.46928197133616	0.00147280230614807	0.0340923938406255	0	0	0.131697	0.3045412
ENSG00000276116.2	FUT8-AS1	-2.98751615362829	0.939603576208369	0.00147504134622241	0.0340923938406255	0.119437	0.395124	4.05621	2.11016
ENSG00000198010.12	DLGAP2	3.89852520693355	1.22595979589182	0.00147286222521342	0.0340923938406255	0.579037	0.0400136	0.0143681	0.00814963
ENSG00000124493.13	GRM4	-4.7756671673806	1.50215248571969	0.00147674018545521	0.0340923938406255	0	0	0.0340988	1.2433336
ENSG00000257512.1	AC124947.2	-3.3548753136956	1.05526762837023	0.00147697378726504	0.0340923938406255	0.0503548	0.298165	3.11882	2.71466
ENSG00000185046.18	ANKS1B	2.76893104101566	0.870444749959278	0.00146740689385948	0.0340923938406255	1.5010827	1.9038351	0.208582419451	0.265923541438
ENSG00000156218.12	ADAMTSL3	3.3610350665252	1.05711705902679	0.00147562417037423	0.0340923938406255	9.3538663	1.0032701	0.3160755	0.4977364
ENSG00000107104.18	KANK1	2.56863502483496	0.8080560368641	0.00147894620107786	0.0341003668079108	79.210956	35.899635	14.823639	5.79594
ENSG00000213809.8	KLRK1	-3.11202944313049	0.979206071183307	0.00148235973575803	0.0341415139579699	3.51811	6.8235885	21.767165	104.782188
ENSG00000101342.9	TLDC2	-2.12318434253372	0.668449479920979	0.00149175637522078	0.0342853909269201	2.6005355	2.6179386	14.37598	13.92462
ENSG00000151117.8	TMEM86A	-2.51546516273678	0.791958518477714	0.00149187826353123	0.0342853909269201	1.66728	1.03812	15.762975	5.645428
ENSG00000159307.18	SCUBE1	-2.49689564123204	0.787375744664127	0.00151830710172026	0.0348545438608487	0.3133589	0.275908	1.4403465	2.771753
ENSG00000156466.9	GDF6	4.17098460127098	1.31582674313505	0.00152513182741284	0.0349729080642731	0.6875	0.124418	0.0270908	0
ENSG00000182890.4	GLUD2	4.21476364391317	1.33094598679897	0.00154156587060819	0.0353111246798656	1.20287	0.162899	0.0433334	0
ENSG00000206557.5	TRIM71	-4.64016044106395	1.46620082851736	0.00155215755810818	0.0355149238650539	0.00556756	0	0.00558198	0.95443
ENSG00000165197.4	VEGFD	3.64158691325039	1.15195592782309	0.00157109414428591	0.0359090100000964	18.4701	1.10066	0.394733	0.706523
ENSG00000196344.11	ADH7	4.84414402032703	1.53306056075431	0.00157884802374827	0.0360335495548477	0	204.4969	0.0454676	0.019271
ENSG00000224167.1	AL390729.1	-4.63108461226834	1.46572914151751	0.00157998148961806	0.0360335495548477	0	0	3.217805	2.585302
ENSG00000026559.13	KCNG1	3.37468950172727	1.06859113550616	0.00158815431732791	0.0361733678826951	0.591923	2.873019	0.0959421	0.15823204
ENSG00000099954.18	CECR2	4.02029842009471	1.27312664676101	0.00158956399732631	0.0361733678826951	0.2781492	0.0754044	0	0.00878922221646
ENSG00000137267.5	TUBB2A	2.93070340052564	0.928585681372223	0.00159897495859721	0.0363480652464631	235.61032	53.74841	26.69411	10.5147
ENSG00000242534.2	IGKV2D-28	-3.27669235587418	1.03901710708303	0.00161244436976532	0.036614541219839	3.74514	0.954519	59.75919	16.41097
ENSG00000049540.16	ELN	3.17218909276368	1.00651634592988	0.00162349727412377	0.0368256270220348	127.863664994537	24.246836048	3.827376499905	10.2525660010554
ENSG00000131941.7	RHPN2	-3.36145187353825	1.06694760470251	0.00162973767137456	0.036927212815502	0.429001	3.68107032	58.286764	16.075930402742
ENSG00000225548.6	LINC01980	-4.66392262485045	1.48089453917151	0.0016360859994388	0.0370310220974491	0.0290947	0	0.029364	6.756331
ENSG00000158571.10	PFKFB1	4.04714515172602	1.28602885159759	0.00164949541677434	0.0372942550595181	14.18937	0.3230124	0.0824633	0.3612704
ENSG00000234964.4	FABP5P7	4.42460172924424	1.40620255191761	0.00165243128357739	0.0373203742160545	61.2562	616.305	11.4548	0
ENSG00000121594.11	CD80	-2.5329422729634	0.805118341119779	0.0016549191092132	0.0373363289666301	0.3537309	0.720389	4.219337	4.151544
ENSG00000181409.12	AATK	-2.23013524712357	0.709298128465236	0.00166573616373628	0.0375098511813047	2.672563	1.5103779	14.986906	10.2701864
ENSG00000155465.18	SLC7A7	-2.06558651451599	0.657001437143443	0.00166677981879974	0.0375098511813047	9.857992	7.65631827359654	45.05467	45.999561
ENSG00000156140.9	ADAMTS3	3.68188740454134	1.17117695592157	0.00166797945040202	0.0375098511813047	2.093642	0.1452026	0.0997045	0.0324418
ENSG00000162804.13	SNED1	3.46210233883213	1.10203799327772	0.00168058776975649	0.0377528821718395	51.0656524	3.2396075	2.217749959	1.679696
ENSG00000260877.2	AP005233.2	-4.01472319078869	1.27976850592528	0.0017064546948494	0.0382929164339921	0.26114	1.83557	86.3916	3.17418
ENSG00000119547.5	ONECUT2	-3.56896957344908	1.13887040373001	0.00172570042348984	0.0386623255154946	0.00890443	0.136657	2.50085	0.812435
ENSG00000268555.1	AC123912.4	4.63051638026744	1.47783401283869	0.00172845073753607	0.0386623255154946	0.961031	0.446886	0	0
ENSG00000284931.1	AC104389.5	4.74683401235817	1.51485850666752	0.00172725251199776	0.0386623255154946	10.7696	0.103066	0	0
ENSG00000146374.13	RSPO3	3.84546531295348	1.22782776613974	0.00173663829394013	0.0387405111991341	45.44603	2.128504	0.305992	1.621337
ENSG00000240654.6	C1QTNF9	4.39233766974628	1.40250450769559	0.00173749131767671	0.0387405111991341	2.9773	0.07380540738206	0.046127000461541	0
ENSG00000185630.18	PBX1	2.50091227995246	0.79843099010398	0.00173452252428533	0.0387405111991341	17.0344764	13.162530498981	1.63223237668	3.6307435
ENSG00000278621.1	AC037198.2	3.99009687346318	1.27674375856762	0.00177676032031887	0.0395739846477825	23.7662	1.22264	0.150661	0.666417
ENSG00000088305.18	DNMT3B	-2.17891197541108	0.697467269368875	0.00178389397122075	0.0396906939944966	0.668302635	0.83980330755769	4.0208400669331	4.51596786
ENSG00000198788.8	MUC2	-3.8649516568485	1.23775530794894	0.00179292229028437	0.0398492664709121	0	0.0222132	0.4980515	0.4081838
ENSG00000100234.11	TIMP3	3.29376855691016	1.05497181706142	0.00179542203355136	0.0398523454203601	315.518	30.8757	11.4763	17.2446
ENSG00000123096.11	SSPN	3.14460444422098	1.00737227516588	0.00179876514946613	0.0398523454203601	29.0368255	4.285204	1.1686411	2.03919
ENSG00000181778.4	TMEM252	4.14417470114426	1.32753825199943	0.00179810738753172	0.0398523454203601	0.809779	0.684177	0.045609	0
ENSG00000284505.1	LYNX1-SLURP2	3.95044027653012	1.2659930663987	0.00180588408168132	0.0399256587214755	0.553009	10.123213	0.3929269	0.0580731
ENSG00000171772.16	SYCE1	3.14949980398975	1.00927842303393	0.00180516066450499	0.0399256587214755	1.3250123	6.05725536	0.361734	0.3661847
ENSG00000134853.11	PDGFRA	2.75883593688763	0.884252462615374	0.00180873083714544	0.0399464590260603	45.9588829	11.9466731	5.763087	2.836658
ENSG00000101082.13	SLA2	-2.90612052485652	0.931910856028435	0.00181802923747285	0.0401095524086248	0.78916	1.487892	5.195786	18.04752
ENSG00000073282.12	TP63	4.31623345747595	1.38474235632135	0.00182705361629323	0.0402491458624767	0.0633999	37.5813068	0.4757525	0.252429
ENSG00000134343.12	ANO3	4.07988926476605	1.30899543118966	0.00182819728331876	0.0402491458624767	0.483889	0.1104945	0	0.0125075
ENSG00000124302.12	CHST8	4.18194184280059	1.34200441179845	0.00183203674388844	0.0402913516423482	0.633949	0.246088	0.0245756	0
ENSG00000260391.2	AC022336.2	4.18296056456902	1.34333678873457	0.00184658077906587	0.0404837725402108	1.78189	0.150461	0	0.037868
ENSG00000170370.11	EMX2	4.33670782905287	1.39261964245878	0.00184528948784445	0.0404837725402108	3.49726	0.109808	0.0782928	0
ENSG00000144642.21	RBMS3	2.95680796704589	0.949547060684691	0.00184623241129401	0.0404837725402108	9.9460355	1.764403533	0.831398000754682	0.58583235199
ENSG00000127990.17	SGCE	3.39258598527488	1.08970737824664	0.00185007851873583	0.0405180728047902	104.645068093979	7.608241	5.40992866824	3.2931989143
ENSG00000178363.4	CALML3	4.65181415169565	1.49435175064148	0.00185239210021005	0.0405263946015683	0.0872208	285.321	1.59352	0.0471306
ENSG00000139292.12	LGR5	-2.80150809441988	0.900245258198293	0.00185863063530505	0.0406204791296753	0.556557	0.2768948	2.1188014	5.67699
ENSG00000187720.14	THSD4	3.53570711453876	1.13665092150072	0.0018668499663664	0.040630642206722	2.33720151	45.926531	1.455772	1.647587
ENSG00000011083.8	SLC6A7	-3.68153518129807	1.18333373066026	0.00186356810722902	0.040630642206722	0.0533436	0.0445066	0.214394	2.35574
ENSG00000143995.19	MEIS1	2.08685193085066	0.670682273235559	0.00186116879896802	0.040630642206722	15.9664	18.420305	5.765666	3.2529832
ENSG00000255248.8	MIR100HG	3.38825573583742	1.08922152397526	0.00186636133002842	0.040630642206722	60.2001775737492	5.98402	1.39789376	3.4233775
ENSG00000225489.6	AL354707.1	-3.95113203021617	1.27039012358523	0.00186978311220163	0.040652265818085	0	0.0656042	2.793673	0.492958
ENSG00000144655.14	CSRNP1	3.07826292976062	0.990609122009228	0.00188712375918731	0.0409867635946185	171.166712	27.469162	15.9318	6.01044
ENSG00000179954.15	SSC5D	3.10405621312588	0.999118881776622	0.00189128355261551	0.0410292252380011	15.8790869	2.314695	0.770087	1.064223
ENSG00000060138.12	YBX3	2.29301534591439	0.738128392492993	0.00189299397896594	0.0410292252380011	610.252841	286.862581	95.242664	97.395107
ENSG00000272468.1	AL021807.1	-3.58788834250494	1.15555744165062	0.00190344455661204	0.0412131141136693	0.127416	0.657787	16.2562	2.85116
ENSG00000163520.13	FBLN2	3.87031704867193	1.2468031633958	0.0019079913619032	0.0412689277132395	242.2201855	4.1354	3.976943	5.958006
ENSG00000261026.1	AC105046.1	4.2244826620361	1.36277425979716	0.00193577004751358	0.0418266025008629	2.60835	0.132032	0.0691611	0
ENSG00000165633.12	VSTM4	3.12946720212083	1.00968475517691	0.001938804368629	0.0418490224120446	13.686975	1.7740965	1.0281683	0.5625355
ENSG00000132357.13	CARD6	2.12065498034754	0.684356149292706	0.00194332833534838	0.0419035170581962	11.3620779	7.14844	2.62927	2.01341
ENSG00000008394.12	MGST1	3.96965999427662	1.28179071063611	0.00195513457513311	0.0420715252158263	1592.033382	155.649672	2.089926092041	54.1691141
ENSG00000225978.3	HAR1A	-4.00056056812668	1.29173190804493	0.00195455748347694	0.0420715252158263	0.0840261	0.212183	13.2253	0.21535
ENSG00000105974.11	CAV1	3.43660807643973	1.11006803910606	0.00196247263551247	0.0421861168899547	427.683715	29.610314	24.872069	9.42335
ENSG00000249242.7	TMEM150C	2.2861700181435	0.738654199608966	0.00196781214716426	0.0422575561397702	6.958332	4.135854	1.59345	0.871507
ENSG00000227591.5	AL031316.1	4.45104096839795	1.4395808563378	0.00198879406809203	0.0425338110950418	48.85705	0.437827	0	0.479586
ENSG00000101938.14	CHRDL1	4.37768063422983	1.41547877303474	0.00198330636407669	0.0425338110950418	243.65799	2.8356570011204	0.0647787	3.341759
ENSG00000272183.1	AC005041.3	-3.31765711212836	1.07293471468831	0.00198723619968616	0.0425338110950418	0.103904	0.444677	4.28302	4.90969
ENSG00000154227.13	CERS3	4.61133567458584	1.49138305375461	0.00198822157689394	0.0425338110950418	0.0284469	53.59005	0.3444596	0.0109031
ENSG00000125999.10	BPIFB1	4.6278850256759	1.49701432183419	0.00199208369847233	0.0425607362245479	0.154205	634.025489	3.525665	0.105412
ENSG00000118898.15	PPL	3.62016683939693	1.17141425962761	0.00199870892130207	0.0426154021175688	13.213861	289.816468	14.1978702	4.311935
ENSG00000214940.8	NPIPA8	-3.96817031601861	1.28398748104587	0.00199816133380595	0.0426154021175688	0.301053	0.231466	22.437582	0.286172
ENSG00000187258.13	NPSR1	-4.69245810687865	1.5185677790686	0.0020011936807063	0.0426250186523611	0	0	6.391937	0.0344078
ENSG00000127324.8	TSPAN8	-3.17806531643842	1.0287450695129	0.00200652914713638	0.0426952734972908	9.959688	74.16792	941.746556	320.907295
ENSG00000215808.3	LINC01139	4.65184662058965	1.50705357400192	0.0020238074220445	0.0429857184349808	0.9711472	0.0294117	0	0
ENSG00000149506.11	ZP1	4.26868383485886	1.38295191235137	0.00202428093398187	0.0429857184349808	1.422332	0.202296	0.0346539	0
ENSG00000152953.12	STK32B	2.96386515287385	0.961685849183837	0.00205651209289304	0.0436259483349647	3.194853	0.989838	0.389984	0.118645796247
ENSG00000121742.17	GJB6	4.60343018230469	1.49452011207134	0.00206857297095137	0.0438374326574012	0.0406895	205.361893	1.188269	0.0645065
ENSG00000105427.9	CNFN	4.29663313423356	1.39563318881879	0.00207957313024719	0.0439608581232317	2.171868	626.343	11.571356	1.11407
ENSG00000140285.9	FGF7	3.57339768952256	1.1607720066864	0.00208068950132381	0.0439608581232317	82.461274	4.994128	1.261083	3.770675
ENSG00000005249.12	PRKAR2B	3.60212767608257	1.17000905682337	0.00207893525400626	0.0439608581232317	116.347585	4.53507	2.79578	4.11272
ENSG00000231133.6	HAR1B	-4.1859967357264	1.36070420564603	0.00209554625863838	0.0441113767507762	0.0816557	0.171549	18.0003	0.140074
ENSG00000198643.6	FAM3D	4.49065569811165	1.45942779931064	0.00209097050614876	0.0441113767507762	0.21014	168.94222	0.0851453	1.459684
ENSG00000106823.12	ECM2	3.77284245664837	1.22623926861633	0.00209264559086081	0.0441113767507762	88.69905	1.8098904	2.596738	1.696785
ENSG00000262179.2	MYMX	4.13525310451875	1.34425206989879	0.0020962322269084	0.0441113767507762	27.7756	0.258217	0.199283	0.499151
ENSG00000158458.19	NRG2	3.07124516364377	0.998742408550896	0.0021042323719665	0.044235312220708	0.5881399	1.592559	0.1611036	0.0832845
ENSG00000101194.17	SLC17A9	-2.42570028637977	0.789216445693755	0.0021152457296706	0.0444222798077817	4.100223	10.637546	65.086939	41.275525
ENSG00000138696.10	BMPR1B	4.33019216267113	1.4096706553206	0.00212789506101116	0.0446431957795125	0.479693	0.0305181	0	0.00776472
ENSG00000123388.4	HOXC11	-4.57330512087586	1.49204201338678	0.00217574239817627	0.0456013849233763	0.0154145	0.0215581	0	7.337172
ENSG00000285815.1	WRB-SH3BGR	4.58325524289358	1.49577421553282	0.00218299831449004	0.0457077539194772	1.10051	0.131031	0	0
ENSG00000231672.6	DIRC3	3.33288713915383	1.08812389503493	0.00219154524337865	0.0458080386825635	0.904691	0.330312	0.0329703	0.0699603
ENSG00000139874.5	SSTR1	2.50045990641111	0.816374665620155	0.00219215911057833	0.0458080386825635	0.853055	0.725115	0.127347	0.157377
ENSG00000283000.1	AL392046.2	4.53245120428414	1.48030595824091	0.00219985368144928	0.0459230411449158	0	12.61281	0.0622866	0.0440315
ENSG00000261011.1	AL136982.4	4.17073464897761	1.36286910157442	0.00221144459205053	0.0461190718455592	6.61847	0.335666	0	0.141686
ENSG00000101197.12	BIRC7	-3.5021025351111	1.14495549084921	0.0022228202952961	0.0463102291939473	0.161094	0.0339914	1.16734	2.89638
ENSG00000165996.13	HACD1	2.26554321193823	0.740939353625661	0.00223069918826254	0.046336198500292	9.7345674	8.550841	2.253397	1.8062556
ENSG00000111961.17	SASH1	2.14471802641087	0.701401339140359	0.00222996963796931	0.046336198500292	24.161238	13.6751771	4.583413	4.5776431
ENSG00000182389.19	CACNB4	2.65578872773497	0.868469403637834	0.00222811621123043	0.046336198500292	1.027646796612	0.821061328858714	0.0833417823	0.195669324727711
ENSG00000246022.2	ALDH1L1-AS2	4.58912340911409	1.50158842378119	0.0022417717866968	0.0465200939379982	0.865645	0.0559777	0	0
ENSG00000279838.1	AL356273.3	3.37685779724861	1.10510594458434	0.00224545578417562	0.0465504527997396	8.24408	0.70919	0.39843	0.29248
ENSG00000136883.14	KIF12	-3.45973208475018	1.13249996557453	0.00225097174149664	0.0466020490521909	0.2622397	5.099470674709	61.07216	46.01871
ENSG00000068781.21	STON1-GTF2A1L	4.53153574147413	1.48343330625512	0.00225239160694066	0.0466020490521909	0.4944572	0.322947	0	0
ENSG00000171954.12	CYP4F22	3.68375437225883	1.20608313966787	0.00225577244736402	0.0466259711285035	0.252033	7.0120200197175	0.190339	0.179333
ENSG00000107957.16	SH3PXD2A	1.91814547799635	0.628079912208587	0.00225824753187282	0.0466311428773619	14.12956	15.41939	4.72033	3.95084
ENSG00000105173.13	CCNE1	-2.55309223410939	0.836116735520856	0.00226179902206633	0.0466585095506774	2.298879	5.518857	21.977423	38.255484
ENSG00000131711.14	MAP1B	3.17707418186047	1.04078819993836	0.00226894185652291	0.0467598351729241	19.24433	2.0676189	1.41622	0.663838
ENSG00000211673.2	IGLV3-1	-3.91021109214489	1.28116389791939	0.00227263660676353	0.0467899711602719	1.37836	17.1029	28.1871	588.285
ENSG00000122223.12	CD244	-2.76820210644433	0.907620665446472	0.00228875723785559	0.046800061412893	1.06264	0.924337	4.0771619	14.0168651
ENSG00000138311.16	ZNF365	3.7371311403145	1.2253024714504	0.00228867110569288	0.046800061412893	0.1080774	2.359845	0.083532	0.0395331
ENSG00000214872.8	SMTNL1	-2.95715893078384	0.969244717221011	0.00228085826935022	0.046800061412893	0.35744	0.301167	6.66385	1.33293
ENSG00000227627.2	AL080276.2	-3.16342057431596	1.03714311648332	0.00228742889828838	0.046800061412893	0.0749356	0.0458921	0.990791	0.744883
ENSG00000167769.4	ACER1	4.29587121732777	1.40800215206972	0.00228050012592157	0.046800061412893	0.0377943	3.57072	0.0382381	0.0323112
ENSG00000114480.12	GBE1	2.7165390844881	0.890445197075564	0.0022825911558421	0.046800061412893	48.8444174	15.162603	7.357246	2.574524
ENSG00000169946.13	ZFPM2	3.22697985548442	1.05759800255826	0.00227902258652942	0.046800061412893	6.8996121	0.888515	0.2215663	0.449696
ENSG00000134317.17	GRHL1	2.94053686497338	0.964729669801571	0.00230337483203634	0.0470072376870979	12.9753574	71.476491	7.3921357	3.1872883
ENSG00000099812.8	MISP	-3.60272041047872	1.18195381152215	0.00230288740588451	0.0470072376870979	0.388526	12.1914	184.81106	118.810951
ENSG00000170537.12	TMC7	-2.12096308950418	0.696178659631421	0.00231461862487138	0.0471907507380149	0.9589789	0.6713761	4.450276	4.468808
ENSG00000171346.15	KRT15	4.57865110797665	1.50342343598424	0.00232306606738622	0.0473169501519414	0.0692239	2018.328013	7.916168	2.663271
ENSG00000167653.4	PSCA	4.31323066087897	1.41696939291558	0.00233468378243934	0.0475074149477146	1.2168726	514.160208	8.565557	0.626136
ENSG00000134028.14	ADAMDEC1	-3.50376805188594	1.15169513325451	0.00234800841217951	0.0477322098068578	0.218882	5.00951	48.119742	59.87499
ENSG00000111110.11	PPM1H	-1.98922826820721	0.653959170200065	0.00235149857358848	0.0477568397324041	0.767569	0.758985	4.360956	3.26715
ENSG00000284755.1	AL049557.1	2.66127350526776	0.875318227711872	0.0023630360664945	0.0479251961722636	2.16783	0.95256	0.360489	0.159195
ENSG00000186480.12	INSIG1	2.55635204999963	0.84085526502292	0.0023643615078067	0.0479251961722636	154.59986	44.3983919416	19.529556	14.852644
ENSG00000128298.16	BAIAP2L2	-3.17124583873289	1.0434258491621	0.00237157521209198	0.0479786147396098	1.358264	6.453268	103.427586	17.44943
ENSG00000267530.2	LINC01836	-3.27732246833153	1.07831773578033	0.00237134888718274	0.0479786147396098	0.0916239	0.655338	8.96052	4.1554
ENSG00000122367.19	LDB3	3.24398309629601	1.06747174285875	0.00237411750383102	0.0479837307259347	1.321905	1.24065100055896	0.232262	0.0158066
ENSG00000189238.5	LINC00943	-3.54152483056556	1.16552065790609	0.00237697967810629	0.0479952958318205	0.0180376	0.041164	0.7361461	0.429922
ENSG00000104140.6	RHOV	4.22167240955531	1.39149868336296	0.0024141181879763	0.0486514452901877	0.312901	124.695	2.30675	0.401064
ENSG00000166897.14	ELFN2	-4.07890134261762	1.3443777029184	0.00241299091895262	0.0486514452901877	0.00578882	0.0387913	2.370109	0.0296232
ENSG00000171223.5	JUNB	2.53659515689299	0.836290501879329	0.00242014673955399	0.0487260859887724	1275.31	499.381	234.264	88.161
ENSG00000137193.13	PIM1	2.52270076545575	0.832175025986298	0.00243378561025889	0.0489277253999419	358.98624	113.5396	37.780898	44.41373
ENSG00000154556.18	SORBS2	2.14930092326612	0.709097884208534	0.00243716519478693	0.0489277253999419	7.5184408	12.5510067022522	2.45528734	2.38494899317
ENSG00000184156.16	KCNQ3	3.32082137509687	1.09551859997287	0.0024352096331804	0.0489277253999419	2.3300554	0.2043098	0.1403587	0.0677534
ENSG00000120215.9	MLANA	-3.72990959543502	1.23182763890681	0.00246220742879693	0.0493831631580429	0.106433	0.143129	0.2810049	6.246927
ENSG00000128918.14	ALDH1A2	3.42699113886535	1.13200259245684	0.00246691473326509	0.0494302733217046	11.0649695	0.7279284	0.4073132	0.40631380018503
ENSG00000066027.11	PPP2R5A	1.90531232370327	0.629508975340658	0.00247268424515994	0.0494513254716672	44.6499135	41.8842237	14.785338	10.9889
ENSG00000102359.6	SRPX2	3.37762381593231	1.11593853507314	0.00247229929595888	0.0494513254716672	83.124443	6.69388	1.841911	4.579623
ENSG00000070371.15	CLTCL1	2.34339393289592	0.774367048499897	0.00247643812646123	0.0494791865514784	3.1092282	1.9302265	0.71021601	0.3620698
ENSG00000144278.14	GALNT13	4.36187013071854	1.44199186478595	0.00248721654240056	0.0495528246313435	0.654071	0.0331432	0.00888074	0
ENSG00000106511.5	MEOX2	3.26955913535008	1.08076513936666	0.0024844714845392	0.0495528246313435	6.33506	0.637457	0.350904	0.245068
ENSG00000211950.2	IGHV1-24	-3.82020028972005	1.26282407805013	0.00248530648304386	0.0495528246313435	1.299	4.35422	4.57313	164.803
ENSG00000278891.1	AC105101.1	4.21804462741474	1.3950763781252	0.0024985056196582	0.049730464655666	0.723531	0.0741016	0	0.0150642
ENSG00000134762.16	DSC3	4.50937961057132	1.49159157128167	0.00250116897925171	0.0497362434877957	0.0140175952	76.90035	0.53480896712	0.0358691156
ENSG00000080573.6	COL5A3	3.21531087075381	1.06387558936814	0.00250893208984135	0.0498433248066208	50.04952	4.9334915	3.715282	1.429356
ENSG00000239282.7	CASTOR1	2.4103232288561	0.79761645205975	0.00251187199082363	0.0498544744845382	12.722394	27.3241330042554	3.207043	4.4748306
ENSG00000112562.18	SMOC2	3.11196678157583	1.02992941264148	0.00251497358958461	0.0498688093321701	84.523469	8.974861	4.777568	4.568009
ENSG00000088881.20	EBF4	-2.08836885729391	0.691833654544109	0.00253945834314598	0.0502592137998079	4.986531	6.307961	40.9166190134038	21.372203
ENSG00000132002.7	DNAJB1	2.08150186079119	0.689507376636388	0.00253757362355178	0.0502592137998079	326.58462	261.3589175	104.0592782	51.018427
ENSG00000142405.21	NLRP12	3.71813477265716	1.23240627677501	0.00255313706137217	0.0504346839484443	1.3076442	0.1122359	0.0290534	0.035332
ENSG00000077943.7	ITGA8	2.1914233818309	0.726348690003721	0.00255255744109777	0.0504346839484443	3.51623	5.199893	0.858196	1.144093
ENSG00000178878.12	APOLD1	3.50022712570558	1.16049275735321	0.00256001563492508	0.0505229450964169	116.105479	4.49659000011914	4.427199	3.41381303133
ENSG00000073792.15	IGF2BP2	-1.96858051422642	0.652756120833464	0.00256304061374627	0.0505350594764893	4.538489	4.019671	25.879343	16.513065
ENSG00000076344.15	RGS11	2.89171689421984	0.959127056203129	0.00257024470815776	0.0505819331814821	15.809169	2.731749235	1.170944505	1.1355765
ENSG00000186594.14	MIR22HG	2.56318849950426	0.850130996969375	0.00256935861834617	0.0505819331814821	141.652431	44.052295	21.884248	10.623899
ENSG00000231437.3	LINC01750	3.56520939655072	1.18345704927125	0.00259072951785741	0.0509372419932208	1.949645	0.548383	0.0165428	0.126367
ENSG00000147027.3	TMEM47	2.18303599603697	0.724944539926787	0.0026011929270292	0.0510505312402014	9.90826	5.23948	1.80844	1.73483
ENSG00000172548.14	NIPAL4	4.03328420172322	1.33938544363568	0.00260136301181044	0.0510505312402014	0.07961536	11.211453	0.277767	0.0682685
ENSG00000112852.6	PCDHB2	2.52137372392234	0.837761446114283	0.00261543767901082	0.0511972328612808	1.441906	0.754148	0.216812	0.16939
ENSG00000176971.3	FIBIN	2.33546443318878	0.775914669499179	0.00261290617770411	0.0511972328612808	10.7353	5.54386	1.42193	1.87578
ENSG00000245812.2	LINC02202	3.69828417974616	1.22884085712697	0.00261616662982164	0.0511972328612808	31.17879	0.8639766	0.706632	0.8174801
ENSG00000100604.12	CHGA	4.43615123946689	1.47446047630016	0.00262402016133382	0.0513030210460779	0.0369379	11.8948265	0.136552589279	0
ENSG00000189280.3	GJB5	4.26374508078484	1.41847340001202	0.00264823146981277	0.0515360105624938	0.0814492	71.0199	0.98969	0.278592
ENSG00000166165.12	CKB	2.4876259563577	0.827484107525858	0.00264489490695859	0.0515360105624938	113.97463921685	66.233658	26.57961099	7.815514661392
ENSG00000185100.10	ADSSL1	2.2163446004526	0.737274600969943	0.00264594310034466	0.0515360105624938	9.0592825281467	5.83693910138255	2.11802992	1.3234495
ENSG00000140961.12	OSGIN1	2.48334757307622	0.825988211643074	0.00264259305526556	0.0515360105624938	21.6445353	8.9580356	4.06967	1.71171
ENSG00000075035.9	WSCD2	2.82295847274975	0.93888427322444	0.00264086261637713	0.0515360105624938	1.362338	0.596312	0.1307621	0.1207964
ENSG00000134242.15	PTPN22	-2.92244612438044	0.972358834092416	0.00265125185901098	0.0515469273775613	0.70921464	2.272025	7.495934	24.26004524
ENSG00000206538.8	VGLL3	3.57505602882877	1.19007980102192	0.00266413891472904	0.0517494786967618	11.5129057	0.372376	0.292493	0.38712
ENSG00000205809.9	KLRC2	-3.35403086105972	1.11668155167675	0.00266832430517981	0.051782786215059	0.54900068875	0.869716	2.199468	20.694063
ENSG00000158373.8	HIST1H2BD	-2.58819292251844	0.862651404752658	0.00269734436651505	0.0522009608289834	5.32383	9.53801	102.3586	27.28657
ENSG00000213424.8	KRT222	3.91687892166918	1.30542461373233	0.00269569048532031	0.0522009608289834	3.62623	0.504586	0	0.1316629
ENSG00000280285.1	AC108215.1	4.23770044049391	1.41238750867833	0.00269642221029724	0.0522009608289834	0.0467772	2.00259	0	0.0266165
ENSG00000170439.6	METTL7B	-2.36079488935676	0.787176486675999	0.00270807900010554	0.0523603577151402	1.80184	0.942001	7.835	10.3196000004633
ENSG00000225950.8	NTF4	4.22710451548246	1.41049583150025	0.0027274678780075	0.0526866352582113	0.0640662	5.736212	0.0652936	0.0548772
ENSG00000091704.9	CPA1	4.26128483217716	1.42230288772488	0.00273505200297223	0.052784488886091	5.706922	0.154187	0	0.105087
ENSG00000216990.2	HSPD1P10	-4.51939146983169	1.50865272961893	0.0027386299882208	0.0528049180525481	0	0	2.12674	0.0545243
ENSG00000186350.10	RXRA	1.87440669766236	0.625815765318061	0.00274317657542628	0.0528439686069481	35.8575312	33.965249	11.4878334	9.649871
ENSG00000180447.6	GAS1	2.89185989625402	0.965739942661707	0.00274940184372897	0.0529134212361526	6.84102	1.40247	0.415489	0.597784
ENSG00000180875.4	GREM2	3.43957907388575	1.1487547590189	0.00275183115355725	0.0529134212361526	0.321035	3.66008	0.0716531	0.192766
ENSG00000170381.13	SEMA3E	3.36251101691795	1.12332678603863	0.00275932480387567	0.0530088804440239	0.76155980414808	0.37250390972	0.00845736	0.0686872
ENSG00000249082.2	C5orf66-AS1	4.19125612090767	1.40066583902949	0.00276855705790189	0.0531375342276244	0.1670221	25.6531	0.0744256	0.434338
ENSG00000109339.21	MAPK10	3.27041828254538	1.09342502680382	0.00278078795404299	0.0533234535487529	17.4796900612303	2.1051389	0.372638385734615	1.17047312028336
ENSG00000197852.10	INKA2	2.44607736223122	0.818291919484107	0.00279665170804733	0.0535786317632212	3.66194	2.46036	0.924207	0.283809
ENSG00000135747.11	ZNF670-ZNF695	-3.25673170682594	1.08988345170018	0.00280674740173571	0.0537229395369669	0.0369783	0.0350066	0.484292	0.6693847
ENSG00000205221.12	VIT	3.90537592508491	1.30737605126015	0.00281558019224694	0.0538428332566639	10.591161	4.839006763	0	0.5006816
ENSG00000154080.13	CHST9	4.55184683206953	1.52478271826003	0.00283353192441576	0.0541367325467911	0.00422315	0.479205	0	0
ENSG00000138685.15	FGF2	3.34662102288613	1.12124123371796	0.00283813278530728	0.054175250498411	16.36604	1.127131	0.439515	0.850332
ENSG00000197245.5	FAM110D	2.73281503635262	0.916091326372533	0.00285321339419863	0.0542654260698812	7.09876	1.72835	0.817778	0.487097
ENSG00000099194.5	SCD	3.64725503879818	1.22235588516574	0.00284700749164398	0.0542654260698812	2300.25	51.6133	87.6281	39.6043
ENSG00000148344.10	PTGES	2.4259120664816	0.813155677145031	0.002851299939229	0.0542654260698812	18.117882	10.005458	4.16864	1.45733
ENSG00000133116.7	KL	2.87016719048076	0.961968005558459	0.00284840752899126	0.0542654260698812	1.67015	0.4388924	0.187371	0.083816
ENSG00000153823.18	PID1	2.91048817554891	0.975766953048558	0.00285652778224115	0.0542792074233837	18.937459	3.939887	0.874987	1.800841
ENSG00000144648.15	ACKR2	3.29364638914393	1.10440354318446	0.00286105296614939	0.0543159502876133	6.4571045	0.617999	0.425115	0.165336
ENSG00000134369.15	NAV1	2.3802149092133	0.798234494129403	0.00286513063445996	0.0543441384322591	14.2066229	5.0633998	1.9677138631341	1.850502
ENSG00000234377.7	RNF219-AS1	-4.07657518274365	1.3673145369061	0.00286890140195521	0.0543664597500717	0.00814098	0	0.270402	0.236012
ENSG00000217275.2	AL031777.1	-4.1848789810693	1.40381351731675	0.00287234694674057	0.0543825832490836	0	0.134079	10.1965	0.668013
ENSG00000168140.4	VASN	3.15977982228207	1.06011134187891	0.00287673699024216	0.0544165438433983	77.6301	6.7497	4.78942	3.27566
ENSG00000197472.14	ZNF695	-2.94992997051095	0.990180014531681	0.00289015724406882	0.0546211052104945	0.1158599	0.653995	6.381129	2.930245
ENSG00000169297.7	NR0B1	4.52643506686368	1.52337262705173	0.002965178757877	0.0559884518795893	1.70792	0.0217718	0	0
ENSG00000136842.13	TMOD1	2.82693116425389	0.951591603715509	0.00297083253803543	0.0559911869603932	12.804100639	2.394346	0.95432	1.03992100253811
ENSG00000099864.17	PALM	3.62905611588231	1.22164572362578	0.00297190639519898	0.0559911869603932	111.97702465472	3.4096238	1.565776	4.261079827
ENSG00000136267.13	DGKB	4.00649380328567	1.34876937658923	0.0029733379973719	0.0559911869603932	0.11809828	0.103759	0.00730659	0
ENSG00000171004.18	HS6ST2	3.94923132543422	1.33008564077398	0.00298619272535968	0.0561827767781091	0.0556573	2.326068	0.0782441	0.00949762
ENSG00000146373.16	RNF217	2.03897434492945	0.687067872317464	0.00300089552524894	0.0563078941525757	3.759761	5.226424	1.11982186659	1.2357832
ENSG00000167759.12	KLK13	4.32181631840164	1.45659685605936	0.00300658217455165	0.0563078941525757	0.110866	481.85769	3.114173	2.931819
ENSG00000068976.13	PYGM	2.95790740769665	0.996837708025649	0.0030043660997415	0.0563078941525757	9.479674	1.435046	0.7015601	0.565266
ENSG00000220323.4	HIST2H2BD	-1.98617248117629	0.669307038360405	0.00300226672372839	0.0563078941525757	1.516318	1.65723	7.63095	8.00814
ENSG00000211640.4	IGLV6-57	-4.02729446041963	1.35744443979144	0.0030089623288747	0.0563078941525757	0.289439	7.38961	10.1399	337.409
ENSG00000239998.5	LILRA2	3.16218430356408	1.06583748658193	0.00300863703916431	0.0563078941525757	7.4025986	1.028659	0.3251257	0.447852
ENSG00000159423.16	ALDH4A1	2.10769885549423	0.710941610213906	0.00303019422395615	0.0564984804386273	28.2819697	25.390833	9.6673732	4.23114
ENSG00000164867.10	NOS3	3.3018087071782	1.11387781189308	0.00303424857724395	0.0564984804386273	79.066393	4.83999100171749	4.477699	2.397025
ENSG00000198695.2	MT-ND6	2.19610173689446	0.740845229937222	0.00303353446606783	0.0564984804386273	6477.8	4022.45	932.505	1439.96
ENSG00000233554.5	B4GALT1-AS1	2.89218581323287	0.975571383080689	0.0030306976404199	0.0564984804386273	9.97465	2.603239	0.893107	0.693466
ENSG00000115226.9	FNDC4	3.61204795412469	1.2183169786641	0.00302894494098759	0.0564984804386273	111.47955	11.00571	6.860456	0.4147372
ENSG00000203688.5	LINC02487	4.33681315178535	1.4630941860223	0.0030353208155873	0.0564984804386273	0.0200072	81.4778	0.2616117	0.644112
ENSG00000272502.1	AC104958.2	-2.95212212839668	0.996295801025511	0.00304559555189669	0.0566394296115375	0.199717	0.38008	1.93878	5.03099
ENSG00000135472.8	FAIM2	3.4151601845492	1.15306371663082	0.00305832537942046	0.0568257461234693	17.595298	0.9069889	0.936693275	0.400423
ENSG00000145358.6	DDIT4L	3.4327328005812	1.15942843214672	0.00306929551361894	0.0568280606624907	3.58991	0.313155	0.0789827	0.167483
ENSG00000198691.12	ABCA4	3.74463502501974	1.2646909166375	0.00306732311134742	0.0568280606624907	0.6934493	0.284645	0.0401875	0
ENSG00000080224.17	EPHA6	4.42681186654767	1.49516307078604	0.00306885737274735	0.0568280606624907	0.300535	0.7322591	0	0
ENSG00000182983.14	ZNF662	2.55331458569944	0.862310672889428	0.0030662729526384	0.0568280606624907	2.8457271	3.603516	0.2889105	0.759494
ENSG00000073712.14	FERMT2	3.36597851402679	1.13716791827588	0.00307672873137077	0.0569154081913503	115.726480021638	5.5235520492908	5.08320223	3.9498939857244
ENSG00000182885.16	ADGRG3	3.32784497968715	1.12475864194721	0.00308920459104742	0.0570958016082564	8.811077	0.649363	0.452323	0.3073469
ENSG00000203747.10	FCGR3A	-2.51081719664461	0.848859775078407	0.00309772339907925	0.0572028059218519	20.568969	6.3781901	86.432128	116.721061
ENSG00000120129.5	DUSP1	2.75710047222247	0.93228173864215	0.0031027725156912	0.0572456066517358	784.69	305.293	135.6	28.1246
ENSG00000255641.1	AC068775.1	-3.81873399545057	1.29180914698214	0.00311542784707825	0.0573780775456178	0	0.238785	1.25982	7.26751
ENSG00000162733.17	DDR2	3.28548577911448	1.11140709149279	0.00311505822305097	0.0573780775456178	54.105219	3.187411	2.367781	2.273541
ENSG00000078804.12	TP53INP2	1.91395934677053	0.647735033241175	0.00312821911051516	0.057524043918954	34.6392	25.9425	10.19562	7.65279
ENSG00000177679.15	SRRM3	2.74874237143702	0.930267290893608	0.00312884250525347	0.057524043918954	1.8385863	6.794841	0.481124	0.722508
ENSG00000181847.11	TIGIT	-2.52951921408883	0.856218993029322	0.00313389353896688	0.0575664107652996	0.8991167	2.2193093	8.181061	15.481573
ENSG00000184304.14	PRKD1	3.09476834142866	1.04774675761901	0.00313951459651549	0.057619164998571	5.796893	0.67397488	0.316383	0.329708
ENSG00000187398.11	LUZP2	4.00893791160893	1.35804266872708	0.00315725977487788	0.0577451651075535	0.1249631674	0.3184126	0.0141446	0
ENSG00000125998.7	FAM83C	4.48746821165326	1.51981688884404	0.00315071801216842	0.0577451651075535	0	28.2841	0.112764	0.013674
ENSG00000165606.8	DRGX	-4.32549798263908	1.46528540976922	0.00315740060180621	0.0577451651075535	0	0.0312201	0.0187001	3.240343
ENSG00000180806.4	HOXC9	-2.62637186958931	0.889684372958962	0.00315695808767228	0.0577451651075535	0.8551551884	0.4199981729	7.87541	3.44696
ENSG00000186462.8	NAP1L2	2.73353668599383	0.926280606390736	0.00316655463183335	0.0578620911321667	1.90633	1.3489	0.121205	0.325523
ENSG00000211648.2	IGLV1-47	-3.69555563340136	1.25247838855331	0.00317163178530847	0.057881978448415	8.33495	38.4535	37.8816	1179.41
ENSG00000253234.1	IGLV2-5	-4.26612216616153	1.44592504023579	0.00317316633604794	0.057881978448415	0.482013	0	1.03157	41.8202
ENSG00000269416.5	LINC01224	-3.58256164394197	1.21477274241413	0.00318636873897813	0.0580218092095939	0	0.2038389	2.032294	2.966771
ENSG00000261578.1	AP003119.3	2.3958962313922	0.812397916573485	0.00318632882838323	0.0580218092095939	3.59473	2.58858	0.961976	0.312781
ENSG00000211710.3	TRBV4-1	-3.20862702078017	1.08822378151344	0.00319320898168374	0.0580958915339491	0.519588	1.14116	6.61073	17.5918
ENSG00000157554.18	ERG	3.0662989530856	1.04024853643024	0.00320189056879598	0.0581528807897704	29.70414534604	3.34073837	2.4652481	1.06673140390015
ENSG00000005243.9	COPZ2	2.97875820396971	1.01050375265891	0.00320048922762437	0.0581528807897704	140.07512	17.179415	9.836286	8.024522
ENSG00000171503.11	ETFDH	1.95722387304689	0.66411534801348	0.00320754564941717	0.0582051508797701	37.158265	25.780887	9.496287	8.259731
ENSG00000265787.2	CYP4F35P	3.6005907471315	1.22238684372824	0.00322390263223681	0.0584513626894907	0.298279	11.3266	0.319338	0.316239
ENSG00000228495.1	LINC01013	4.16532321409249	1.41433303152359	0.00322871692990502	0.058488053702575	1.265445	0.251539	0.029147	0
ENSG00000211611.2	IGKV6-21	-4.08125841290417	1.38646951792109	0.00324383665164315	0.0586605456270826	1.54989	2.84972	0.657471	229.425
ENSG00000177409.11	SAMD9L	-1.99377988441732	0.67727599390427	0.00324186526178214	0.0586605456270826	5.43263	8.365072	41.614896	28.32255
ENSG00000148926.9	ADM	3.13359461259605	1.06516064741727	0.00326206727616359	0.0589393690009591	154.0730026322	14.45361	11.720133	5.037046
ENSG00000242258.1	LINC00996	-2.75499708957458	0.936764586624248	0.00327185607446623	0.0590144849094128	0.250175	0.805738	3.420796	6.594103
ENSG00000231817.8	LINC01198	3.43295425131825	1.16720397912976	0.00326966960874697	0.0590144849094128	1.947172101	0.4517364	0.0728672	0.0894373
ENSG00000283317.1	AL831711.1	-3.26495804052057	1.11080535156026	0.00328985201502347	0.0592371206038462	0.252116	0.216862	4.44411	2.60353
ENSG00000244122.2	UGT1A7	4.5030038381462	1.53191719868796	0.0032878850892996	0.0592371206038462	0	78.320079	0.0230662	0.14317
ENSG00000166780.10	C16orf45	2.76488526227585	0.941310842567802	0.00331114363074561	0.0593654913231799	42.234319	7.725886	3.587023	3.353414
ENSG00000278318.4	ZNF229	2.71156608910713	0.922963498528591	0.00330453260105366	0.0593654913231799	0.587766	1.898447	0.154086	0.2008301
ENSG00000236740.6	AL033384.1	4.04426349473285	1.3767175654669	0.0033074955217772	0.0593654913231799	0.129969	3.7525	0.13035	0.0138669
ENSG00000146166.16	LGSN	-4.10025072001472	1.39582181601236	0.00330851721254974	0.0593654913231799	0.0094192	0.0315845	0.0189076	2.395021
ENSG00000165474.6	GJB2	4.10428177432799	1.39705085441719	0.00330530520301516	0.0593654913231799	0.789464	677.8714	7.740242	7.39653
ENSG00000242207.1	HOXB-AS4	-4.38693480593477	1.49409950952678	0.00332288830206272	0.0595251418144722	0	0	1.05438	3.28088
ENSG00000146013.10	GFRA3	2.63580748370912	0.89809635460588	0.00333673764826385	0.0597221898974911	2.99813	1.577636	0.551753	0.196677
ENSG00000153563.15	CD8A	-3.02235584561389	1.0300851668601	0.00334534246225406	0.0598251131965724	2.98711	11.64595	32.514489	141.27422
ENSG00000127241.16	MASP1	3.51897002063493	1.19946859256296	0.00334867715131054	0.059833695152871	4.4105479	0.4234769	0.2836219938	0.0285727
ENSG00000146592.16	CREB5	3.56380406879417	1.21519917500366	0.00336037812289489	0.0599916227238109	22.3067574	0.5831367	0.5188226	0.7514535
ENSG00000039537.13	C6	3.73014416609149	1.272209482098	0.00336764615150253	0.0600600364012886	19.840863	0.4933297	0.807327	0.1222954
ENSG00000105675.8	ATP4A	4.33098176996469	1.47723881653066	0.00336994144796581	0.0600600364012886	0	9.20303	0.0555238	0.0459104
ENSG00000214018.3	RRM2P3	-3.050034160828	1.04088765195237	0.00338717550189008	0.0603158974886272	0.0975911	0.165047	2.32758	1.25252
ENSG00000153283.12	CD96	-2.53563479761793	0.865679560448525	0.00339979406118261	0.0604892052023145	1.7513054	4.146276	14.2046	30.65613
ENSG00000159231.5	CBR3	2.39311423091747	0.817180064930538	0.00340598600506636	0.0605479734352722	15.5063	35.6049	7.25622	3.15595
ENSG00000104899.7	AMH	-2.75146567632534	0.940085639864564	0.00342442066032739	0.0607905937149642	1.324063	1.602623	5.348857	21.19425
ENSG00000284874.1	SEPT5-GP1BB	3.00046520559951	1.0251928821399	0.00342543495287813	0.0607905937149642	0.59476	3.81739	0.208037	0.2778154
ENSG00000137726.16	FXYD6	2.75358327939805	0.941129422049743	0.00343540270992184	0.0609128188927007	78.384712	15.9918786	5.165548	7.764031
ENSG00000124212.5	PTGIS	3.89354050119895	1.33086052708746	0.00343813467961568	0.0609128188927007	84.1378	1.33923	0.2508423	2.39652
ENSG00000197721.16	CR1L	-3.83452758466113	1.31142018347758	0.0034561980157806	0.0611811268688729	0.201606	0.0862222	0.518955	8.12314
ENSG00000095777.15	MYO3A	4.31031861453182	1.47442468472229	0.00346242361981493	0.0612293408663118	0.00869982	1.1114031	0.0130056	0
ENSG00000105327.17	BBC3	-2.17995696774544	0.745815474743627	0.00346768584418684	0.0612293408663118	1.672236	3.350331579966	17.271414	12.367896
ENSG00000169282.17	KCNAB1	3.0722208678308	1.0510469542685	0.0034666526605199	0.0612293408663118	7.19487800208819	0.7756086	0.42481828336	0.389892
ENSG00000260515.1	AC034229.2	-4.35126506509227	1.48888339593915	0.00347231119462037	0.0612594026330374	0	0	0.329115	0.296552
ENSG00000198300.13	PEG3	3.189606277218	1.09151134775362	0.00347576641812102	0.0612687875167354	4.02356000648484	0.660054197541	0.08036590647425	0.312271227582372
ENSG00000272143.1	FGF14-AS2	3.04937879317885	1.04362851219426	0.00347902533615906	0.0612746991769392	7.68363	1.36456	0.655311	0.321938
ENSG00000062282.14	DGAT2	3.66748319671007	1.25616563770989	0.00350497039919923	0.0616798275372096	658.53231	9.071548	18.203726	14.4490916997
ENSG00000137251.15	TINAG	-3.79255716761275	1.29942023812992	0.00351546970956553	0.0616852191944182	0	0.194964	1.17472025	4.31442
ENSG00000113578.17	FGF1	3.51841855399376	1.20551932514921	0.00351616573363684	0.0616852191944182	8.017417	0.6884084	0.506155	0.0582002
ENSG00000162407.8	PLPP3	3.03363198167412	1.03925095880428	0.00351092891425727	0.0616852191944182	161.106952	16.116707	11.810511	7.3168797
ENSG00000184949.15	FAM227A	-2.99468887652141	1.02610083448952	0.00351704933142467	0.0616852191944182	0.1560262	0.1757586	4.040094	0.4368983
ENSG00000186205.12	MARC1	3.11536257900521	1.06768740029527	0.00352442316337349	0.0617628637802215	106.89466	8.949103	5.449477	5.712308
ENSG00000148339.12	SLC25A25	2.39770087369351	0.821884611885822	0.00353052727810643	0.0618181463841542	82.664887	34.74788711674	17.140872	6.64015163
ENSG00000175329.12	ISX	-4.34759893160351	1.49044722491189	0.00353442855564051	0.0618347980781882	0.0163022	0.0136868	0	4.13269
ENSG00000283078.1	AL137077.2	-2.50201181068276	0.857856952297114	0.0035388748471043	0.0618609490579308	0.234058	0.253608	2.06106	1.82891
ENSG00000124762.13	CDKN1A	2.61025194330909	0.895395080558289	0.00355465497097372	0.0620850112805319	830.98917	183.120706	95.039328	69.44
ENSG00000058404.19	CAMK2B	3.38610683218954	1.16164945972717	0.00355787983403255	0.06208959487218	0.2109325	0.9613175	0.0240543	0.0602146
ENSG00000145861.7	C1QTNF2	2.54976973566276	0.874875570976718	0.00356330719706684	0.0621325753272245	1.87406	0.894958	0.278797	0.200025
ENSG00000266088.5	AC004585.1	-3.23481183346174	1.11033408957594	0.00357552937353601	0.0621904731451795	0.1729966544	0.537428	10.69115	1.53052
ENSG00000174145.7	NWD2	4.25703655821918	1.46109484921117	0.00357294742311688	0.0621904731451795	1.76166	0.00974017	0.0233181	0
ENSG00000077942.18	FBLN1	3.236366816179	1.11086627065758	0.00357548253855589	0.0621904731451795	577.1121586	77.954317	8.9181509	42.800631
ENSG00000079337.15	RAPGEF3	2.17355466501359	0.746204553459673	0.00358188505419316	0.0622493605728311	20.66037560636	20.6963559	3.3809458655098	6.04827
ENSG00000165863.16	C10orf82	4.37742368315532	1.50343494502806	0.00359565562319176	0.0623852203695995	0.960225	0.2218457	0	0
ENSG00000184985.16	SORCS2	3.0216875272643	1.03779480643431	0.00359533800218261	0.0623852203695995	4.314157	0.522154	0.26138	0.2544886
ENSG00000168389.17	MFSD2A	2.0906934755217	0.718289945619545	0.00360673221656757	0.0625256414615712	18.595906	27.342517	7.972644	3.9846
ENSG00000225783.7	MIAT	-3.01734474762987	1.03774906511597	0.0036423007298018	0.0630900669387735	0.730241390084	4.10213298	13.748405367	44.28262587
ENSG00000134757.4	DSG3	4.42374869473923	1.52163025060679	0.00364629978314106	0.0631071817959154	0.0177449	235.105	1.09446	0.0303547
ENSG00000164330.16	EBF1	3.39397008364486	1.1677288985964	0.0036553087569039	0.0631587932695374	33.49779666079	1.3349936	1.669711	0.8406887
ENSG00000182050.13	MGAT4C	3.46664916616801	1.1926814737556	0.00365378921089298	0.0631587932695374	0.2656475	0.032354	0.0152347	0.00324935
ENSG00000169184.5	MN1	2.37358611141808	0.817040128038175	0.00367131711055515	0.0633309755721197	2.08695	0.844585	0.2712707	0.301233
ENSG00000196247.11	ZNF107	-2.20740218134559	0.759835785909623	0.00367130780531164	0.0633309755721197	0.795844000138159	1.5197041	5.825781	7.744888032418
ENSG00000276180.1	HIST1H4I	-2.81092435680653	0.967822379777176	0.00367980757351158	0.0634252359648266	0.38685	0.544504	8.53623	1.80132
ENSG00000182077.11	PTCHD3	4.3565988249784	1.50021842453071	0.00368455991246856	0.0634395870284415	0.278011	0.1191466	0	0
ENSG00000115556.13	PLCD4	2.00173660767547	0.689351886115831	0.00368669387855536	0.0634395870284415	3.36348	3.748908	0.9141465	0.992336
ENSG00000147138.2	GPR174	-2.97642023315749	1.02583036570923	0.00371411485374455	0.0635028046318131	0.293136	1.10196	3.11997	12.8141
ENSG00000108381.10	ASPA	3.24845628964687	1.1191379050955	0.00370029783863388	0.0635028046318131	4.024736	0.749109	0.0543556	0.3161653
ENSG00000272554.1	AC012087.1	-4.42948067602783	1.52635112533402	0.00370781010442724	0.0635028046318131	0	0	0.0786284	5.88378
ENSG00000170271.10	FAXDC2	2.50532235319298	0.863361491170578	0.00370997929007646	0.0635028046318131	19.6203463	7.07251	1.62468	2.929325
ENSG00000107796.13	ACTA2	1.99793203779735	0.688601907657493	0.00371460654032172	0.0635028046318131	365.5850236	214.133006	80.950726	76.314127
ENSG00000144476.5	ACKR3	3.3846100005203	1.16636683921999	0.00370977910746597	0.0635028046318131	204.19315	7.50411	8.423789	6.60713
ENSG00000114638.7	UPK1B	4.01705186794796	1.38410857462465	0.003704732965647	0.0635028046318131	0.0271248	6.238849	0.1022226	0.0463423
ENSG00000072195.14	SPEG	2.63784204803512	0.90902627937101	0.00370986783207739	0.0635028046318131	7.767963290974	9.8714793	0.5622558	2.02038159
ENSG00000136160.15	EDNRB	3.19065717634912	1.09980367106205	0.00371837120553161	0.0635153562320595	30.318538	2.0878233477312	1.89842795531237	1.04720323
ENSG00000270210.1	AC104695.2	2.94001329908031	1.01387831491406	0.00373437298936335	0.0637367455081974	9.19534	2.07913	0.833337	0.488564
ENSG00000188373.4	C10orf99	4.39246002612924	1.51499883480833	0.00373978038863668	0.0637771010296471	0	166.0887	0.1695354	0.698208
ENSG00000186081.11	KRT5	4.35815820404925	1.5033664407077	0.00374435201030565	0.063803149417883	1.721885	4115.186286	32.475351	0.3838952
ENSG00000162398.11	LEXM	4.02008873143228	1.38730627812574	0.00375831084354713	0.063882493849093	0.03245	5.93207	0.0655628	0.0831934
ENSG00000170276.5	HSPB2	3.24328875035887	1.11929917046386	0.00376021834174918	0.063882493849093	19.0998	1.51739	0.587559	1.06309
ENSG00000111254.7	AKAP3	3.41551292810182	1.17847329254015	0.00375248591350068	0.063882493849093	0.196731	0.6531840952801	0.03042636576	0.0258315844
ENSG00000261040.7	WFDC21P	4.08351562003336	1.40931171911629	0.00376120031536718	0.063882493849093	0.186436	154.098184	1.71742	1.653909
ENSG00000189366.9	ALG1L	-3.07282502677215	1.061192061888	0.00378392062617639	0.0642163501247214	0.219265	0.178555	4.62556	1.77587
ENSG00000231995.2	AL590399.4	4.34115139023257	1.50057734447027	0.00381596572683226	0.0647077877578296	0.959327	1.95754	0	0
ENSG00000166949.15	SMAD3	2.07315127066794	0.716873446422748	0.00382877388361402	0.0648724913715975	57.917394	31.491713	14.59825	8.72157
ENSG00000239605.10	STPG4	-3.28047413975115	1.13448527782893	0.00383289345085772	0.0648898334705387	0.2984323	0.0688222	5.184979	1.6886486
ENSG00000255346.9	NOX5	3.83249765530921	1.32554860632176	0.00383707912566635	0.0649082658554004	0.0782915	0.3184318	0.01822479	0
ENSG00000159450.12	TCHH	3.20312961733146	1.10913368752322	0.00387753742907126	0.0655397636902456	0.31723100673137	0.1122250206155	0.014141500295621	0.02405210462714
ENSG00000124334.17	IL9R	-3.00598229762713	1.04116381741826	0.00388765248187929	0.0656049181704574	0.0771679	0.33976	1.637662	3.347486
ENSG00000280734.2	LINC01232	-2.08584962419018	0.722412941301828	0.0038851783738134	0.0656049181704574	0.942121	1.3996268	6.521696	6.086206
ENSG00000116771.5	AGMAT	-2.81709734612907	0.976099449548865	0.00390077757350468	0.0657734490451203	0.184516	1.06817	8.79325	4.56877
ENSG00000132938.19	MTUS2	3.82233862940497	1.3247665814229	0.00391050575059108	0.0658844775133749	0.0849318	0.2169244	0.0131038	0
ENSG00000100385.13	IL2RB	-2.47271128447204	0.857874958045251	0.00394698532201655	0.0663537483544269	2.79865	5.16039	16.180576	40.971742
ENSG00000147697.8	GSDMC	3.58475865855259	1.2436456325253	0.0039458336284391	0.0663537483544269	0.796012	29.62298	1.414873	0.329231
ENSG00000273802.2	HIST1H2BG	-3.1941086515429	1.10818110705918	0.00394785649114797	0.0663537483544269	0.0705674	1.04115	9.917	7.56995
ENSG00000275993.2	SIK1B	2.20602252815735	0.765439475489566	0.0039511720298544	0.0663562616776589	83.372016	33.897441	13.918157	12.8496899
ENSG00000240184.6	PCDHGC3	2.38210871978218	0.826938187459655	0.00396872460687964	0.0665976773703685	85.344024	26.48428	12.970868	9.2350646
ENSG00000148942.14	SLC5A12	-4.08836964368963	1.42010116648323	0.00399028858635975	0.0669059667852111	0.0156125	0.00654166	0.00783138	1.2303381
ENSG00000180739.13	S1PR5	2.83244187534291	0.984445501247002	0.00401227309248319	0.0671207204520873	1.383174	7.57343	0.71571	0.4566605
ENSG00000144824.20	PHLDB2	2.83526334694471	0.98542010462191	0.00401204924947547	0.0671207204520873	45.19028833475	6.268929	3.66847431592	2.9822106794559
ENSG00000170873.18	MTSS1	2.28889971643562	0.795540973173423	0.0040127039804602	0.0671207204520873	13.2320314	32.478899	6.582742	3.4551239
ENSG00000160191.17	PDE9A	2.46633822021909	0.857504599238696	0.00402519145555881	0.0672223009697667	9.283033728878	3.065484124	1.1133590587	1.118707740788
ENSG00000152969.19	JAKMIP1	-3.1026902657773	1.07870537553514	0.00402355280765772	0.0672223009697667	0.1678732	0.6484348	1.8135654	9.3687899
ENSG00000013016.15	EHD3	2.65518922486633	0.923344367363826	0.00403232492691244	0.06728781699296	3.33119	16.4206	1.67763	1.38021
ENSG00000026751.16	SLAMF7	-2.97021886952754	1.03345749011454	0.00405231927180579	0.0675676687492264	2.787351	12.9558897	37.668875	142.777555
ENSG00000275880.1	AL139385.1	2.89091854943932	1.00597852839205	0.00405645539414298	0.0675828685261071	0.460781	1.4464	0.185299	0.0655455
ENSG00000185513.16	L3MBTL1	-2.45379139095396	0.854036717000371	0.00406377312532762	0.0676510094787463	1.3245004	3.50051452215385	12.325331	22.2949254
ENSG00000137094.14	DNAJB5	2.28974063972242	0.797015181661257	0.00406729741189957	0.0676559416317486	15.156552	5.8096851	2.2857623	2.1691433
ENSG00000109424.3	UCP1	4.37113194638373	1.52211067762126	0.00408196757203711	0.0678430681055206	1.56608	0.0629008	0	0
ENSG00000144395.17	CCDC150	-2.9452337758296	1.0256704127818	0.00408502084780605	0.0678430681055206	0.2007588	1.671639	11.6534449	10.6067208
ENSG00000163586.9	FABP1	-4.35154778967975	1.51595398652371	0.00409821596682163	0.0680083202285151	0.392827	1.01477	0	309.597285
ENSG00000120332.15	TNN	3.595951379557	1.2535927083198	0.00412401675520797	0.0683532121768802	1.6596354866	0.0588874	0.0295725	0.050268793342
ENSG00000225762.1	LINC01389	-4.32404371687545	1.50747528141899	0.00412552189530767	0.0683532121768802	0	0	6.67229	0.705223
ENSG00000204642.13	HLA-F	-2.14680801663911	0.748528303771159	0.00413025230088476	0.0683775339449002	74.500234	145.655116	850.57931	437.98848
ENSG00000185860.13	CCDC190	4.19494127441569	1.46284695998261	0.00413525408082925	0.0684063064562749	0.0589769	10.62278	0.1590189	0
ENSG00000073756.11	PTGS2	3.21529449436741	1.12157376206859	0.00414683702148858	0.0685438147739583	39.513872	4.2027622	3.40816	0.5730311
ENSG00000172116.21	CD8B	-3.11787543699812	1.08812206579985	0.00416518490447378	0.0687480994886491	0.943374	4.006093	9.401342	56.761878
ENSG00000061337.15	LZTS1	1.94825736437724	0.679976903093551	0.00416770055763756	0.0687480994886491	3.61856	3.108418	0.883073	0.995791
ENSG00000188820.12	CALHM6	-2.21054876792802	0.771548653045378	0.00416903642588258	0.0687480994886491	8.252030063	9.42436	35.4674	66.83413
ENSG00000070087.14	PFN2	1.9873906606168	0.693859919236986	0.00417993425098612	0.0688736178981274	22.163788	13.9593980106135	4.951735	4.890828
ENSG00000260266.1	PPIAP46	3.98777866311183	1.3935090156875	0.00421400438184299	0.0692173337296608	0.0601668	1.377954	0	0.0256754
ENSG00000105963.14	ADAP1	-2.4538284119349	0.857385982389842	0.00420992816759413	0.0692173337296608	7.8202662	12.379845114405	127.8339259	31.140355
ENSG00000171533.11	MAP6	2.94098562956922	1.02769394465564	0.0042133174248074	0.0692173337296608	4.594227	1.332767	0.1289588	0.501704
ENSG00000248690.7	HAS2-AS1	3.67612613026912	1.28438056884943	0.00420740206635655	0.0692173337296608	11.716254	0.325234	0.2499246	0.2459066
ENSG00000183036.10	PCP4	4.18092018307506	1.46150324229033	0.00422708792332282	0.0693235804263872	0.120288	7.4639	0	0.103469
ENSG00000140274.13	DUOXA2	4.3635346095198	1.52525459458079	0.00422498163006834	0.0693235804263872	0.0763208	112.6805	0.551154	0
ENSG00000264920.1	AC018521.5	2.30437626806072	0.805719116067858	0.00423608519292811	0.0694168174812981	17.560695	11.205464	4.2912078	1.99684
ENSG00000283992.1	SLURP2	4.23729149529567	1.48198548724975	0.00424712197034328	0.0695433042003319	0.514905	448.5941	5.51282	0.0423323
ENSG00000118137.9	APOA1	-3.90846670241355	1.36796618108746	0.00427481371556126	0.0698875356196946	1.4896150703249	0.670524	0.326468342014	88.3067524484
ENSG00000260908.1	AC009093.3	-3.48715870701577	1.22050348587639	0.0042746689622511	0.0698875356196946	0.0861704	0.121687	4.798252	0.368096
ENSG00000179796.12	LRRC3B	3.48839424771721	1.22136953380512	0.00428834994327861	0.070054190538719	0.261341800685765	0.2937157	0.0141141	0.0297803
ENSG00000180891.12	CUEDC1	2.0509490187666	0.71819879801323	0.00429441932422952	0.0700883882939765	34.556948	29.5905934	12.112536	5.1695268671488
ENSG00000225523.2	IGKV6D-21	-3.94350957870823	1.38103027501044	0.00429713149280785	0.0700883882939765	0.873778	4.06796	0.966917	225.657
ENSG00000180818.4	HOXC10	-3.49363967026327	1.22425423786998	0.00432149450607354	0.0703762263813484	0.0682255	0.2288149	0.742017	5.906564
ENSG00000272301.1	AP002360.3	-3.3362246963296	1.1690624975078	0.00432050524809852	0.0703762263813484	0.164591	0.285421	4.1355	3.40876
ENSG00000280587.1	LINC01348	3.41756221474823	1.19775686406261	0.00432674632974998	0.0704070468363586	4.20678	0.24576	0.247874	0.0657594
ENSG00000017427.16	IGF1	3.42866273867957	1.20219212488525	0.00434438729862937	0.0706392656260457	36.885945	1.644851	0.52426	1.828837
ENSG00000130032.15	PRRG3	3.73514009181115	1.31015964320403	0.00435950536264648	0.0708301340276803	1.32431	0.212382	0.0656155	0
ENSG00000137261.13	KIAA0319	-2.95913530563274	1.0380781408144	0.00436381803315986	0.0708452843973645	0.0369263	0.0386926	0.845086	0.1797605
ENSG00000171621.13	SPSB1	3.08427393336043	1.08227080360749	0.00437443647437552	0.0709579715723129	170.2976	12.527816	8.96859	8.89517
ENSG00000112183.14	RBM24	3.19047266702866	1.11962426072648	0.004377530284985	0.0709579715723129	1.461297	0.3789025	0.1140854	0.0366994
ENSG00000113594.9	LIFR	2.41379470726757	0.847665076627128	0.00440529243692216	0.0713528007615545	9.0202852	3.7440311	1.897877	0.6467374
ENSG00000187627.15	RGPD1	-3.42155776212431	1.20213914046133	0.00442410055030568	0.0716021030377272	0.0938407	0.0409933	0.184627	2.473072
ENSG00000148826.8	NKX6-2	4.18579647747194	1.47136847590798	0.00444348187822575	0.0718602906525722	0.0217287	1.361434	0.0214966	0
ENSG00000186148.13	AC013268.1	3.25704769854084	1.14503843264792	0.00444829080321096	0.0718825959479556	1.4713795	0.7628063	0.1556446	0.0612479
ENSG00000114656.11	KIAA1257	-2.5415400847499	0.893580870732504	0.00445203744573375	0.071887714040935	0.1864416	0.49535976	3.2646095	2.3285623
ENSG00000213468.6	FIRRE	-2.43860697357721	0.857609464266833	0.00446219136105245	0.0719962038000757	0.1435955	0.1282408	1.00344	0.9903494
ENSG00000087494.15	PTHLH	2.14213251362537	0.753835037919834	0.00448812602745266	0.0723589487764463	6.50774700269102	8.979864	2.537908	1.284708
ENSG00000158714.10	SLAMF8	-2.51617792252264	0.885685306831287	0.00449809165854102	0.0724082204849165	2.163313	6.722631	23.5447	44.115916
ENSG00000147614.3	ATP6V0D2	-2.92881825330896	1.03091478587343	0.00449737697021668	0.0724082204849165	0.0419869	0.158793	1.69115	0.824564
ENSG00000124466.8	LYPD3	4.12520725755863	1.45251018538193	0.00451059077937731	0.0725216121241726	0.8025957	612.4773	10.632418	0.4243863
ENSG00000182566.13	CLEC4G	3.90575150986809	1.37528867424016	0.00451205602413861	0.0725216121241726	14.724876	0.0684536	0.123175	0.277394
ENSG00000124575.6	HIST1H1D	-4.25585036206114	1.49939826879018	0.0045344273634038	0.072713896793864	0	0	2.37159	0.860285
ENSG00000262454.3	MIR193BHG	2.8758671495477	1.01318313775275	0.00453335755651895	0.072713896793864	6.0556620173022	0.8802383	0.3910870104292	0.4329666051794
ENSG00000144229.11	THSD7B	3.35991445568212	1.18372137348728	0.00453355584413151	0.072713896793864	0.51139875	0.11917200183015	0.00839249	0.035675500575588
ENSG00000171517.5	LPAR3	3.498442393657	1.23286430726153	0.00454464104684661	0.0728219661321546	0.12393	4.294533	0.150823	0.115245
ENSG00000172817.3	CYP7B1	2.55336704628576	0.90032202520559	0.00456739021120465	0.0731305816933829	2.40614	3.82472	0.30843	0.724417
ENSG00000146950.12	SHROOM2	3.2051122422483	1.1302312240742	0.00457107402059292	0.0731336949600054	0.3528798	2.954817	0.2576752	0.0456175
ENSG00000172915.18	NBEA	2.67980310627285	0.94514821024262	0.00457789734351629	0.0731792187043806	0.9192494	0.8611752	0.0532097718	0.194409922
ENSG00000123500.9	COL10A1	-3.17562996422864	1.12010576440219	0.00458090247340748	0.0731792187043806	0.1833	0.0749504	3.93764	0.642427
ENSG00000131831.17	RAI2	2.25442025278882	0.795339901476521	0.00458921659746614	0.0732562000504896	11.5506	4.77482601820198	1.6895905395	1.840553
ENSG00000105538.9	RASIP1	3.01945482417382	1.06578984349291	0.00461036147513717	0.073537721580974	47.931597	4.77863	4.181781	1.584077
ENSG00000187193.8	MT1X	2.77855825619988	0.981164504108812	0.00462725391233412	0.073718494289257	169.262167	616.96787	93.983238	19.569566
ENSG00000019549.11	SNAI2	2.25091631893525	0.794872195100177	0.00462872935181364	0.073718494289257	14.539946	8.1836868	3.748905	1.43023
ENSG00000211699.2	TRGV3	-3.84477373233328	1.35810222427809	0.00464041807685523	0.0737925056698094	0	0.118839	1.86345	3.20467
ENSG00000102383.13	ZDHHC15	3.04282163260616	1.07477160692055	0.0046383393091616	0.0737925056698094	0.6639781	0.3828299	0.0169352	0.0863859
ENSG00000204019.4	CT83	-4.33039471758183	1.53016798912615	0.00465461683238011	0.0739621790673652	0	0	0.138735	9.08288
ENSG00000155629.14	PIK3AP1	-1.86564530934022	0.659334955846738	0.00466081946963507	0.0739710066398983	5.37474	3.72386	23.138356	18.293943
ENSG00000100298.15	APOBEC3H	-2.83955592407967	1.00355763407552	0.00466223101156094	0.0739710066398983	0.699106	1.971129	5.771412	21.613437
ENSG00000187758.7	ADH1A	3.9923057068061	1.41129148093773	0.00467182984669145	0.0740672327963737	1.299307	0.2125269	0	0.0334927
ENSG00000204869.8	IGFL4	-3.52052374744449	1.24493181015478	0.00468566641635438	0.074230447785617	0	0.230239	1.858844	3.986724
ENSG00000106853.19	PTGR1	2.47354984943097	0.875007433492121	0.00470024561590725	0.0743571947146337	43.381596	152.81202	24.798059	11.769132
ENSG00000197057.9	DTHD1	-3.32465265867098	1.17609598031227	0.00470076258394435	0.0743571947146337	0.0314587	0.2963143	1.017372	4.758445
ENSG00000160678.11	S100A1	2.66050313208532	0.941338493262233	0.00470894287437341	0.0744300687745292	18.970961	4.818848	2.68713	1.031101
ENSG00000233521.5	LINC01638	4.14941890127928	1.46827092734939	0.00471247202938119	0.0744300687745292	6.95303	0.113724	0	0.0917037
ENSG00000164035.9	EMCN	2.91607397113239	1.03236787208386	0.00473328511992449	0.0746462925722328	36.196754	4.0964443	3.179098	1.656276
ENSG00000187957.7	DNER	3.51117501341233	1.24302776379369	0.00473255576387061	0.0746462925722328	1.298245	0.1914557	0.074568	0.0131605
ENSG00000125945.14	ZNF436	1.95665339748259	0.692830824248446	0.00474072123390306	0.0746512218943458	19.544693	12.276813	5.616577	3.4712334
ENSG00000066294.14	CD84	-2.13415067447352	0.755658663695626	0.0047394986005008	0.0746512218943458	2.446392	2.1018176	8.663151	16.101368
ENSG00000134775.15	FHOD3	2.03219921858581	0.719642912154907	0.00474432672183797	0.0746519097319835	2.273146	2.6184417121474	0.634971000281001	0.6480903
ENSG00000183807.7	FAM162B	2.78707561367632	0.987533258354039	0.00476864994435283	0.0749089754088743	5.44725	1.61719	0.685366	0.288456
ENSG00000167874.6	TMEM88	3.04922253351059	1.08048914421411	0.00477138614298617	0.0749089754088743	60.0633	5.08215	3.229092	3.338244
ENSG00000078053.16	AMPH	2.671896100551	0.946736803512452	0.00476929885839671	0.0749089754088743	2.891198	0.725785658	0.3268518	0.218784
ENSG00000185739.13	SRL	3.04469481507642	1.07905852441415	0.0047781522572456	0.0749590517661755	1.43473	0.226861	0.0883662	0.0802754
ENSG00000267508.5	ZNF285	2.79131235132658	0.989464449444359	0.00478692048577284	0.0750087546616784	0.4956146	0.8320299	0.0549069	0.1087
ENSG00000173546.7	CSPG4	3.36479274393005	1.19279591911223	0.00478847815913573	0.0750087546616784	31.1988	1.79506	2.13699	0.32337
ENSG00000137801.10	THBS1	3.48237302892367	1.23492777326678	0.00480385929629381	0.0751373783515089	593.51149	11.181834	15.195812	19.900761
ENSG00000177791.11	MYOZ1	2.98839094032523	1.05970647171781	0.0048021010035608	0.0751373783515089	1.40401	0.591827	0.106456	0.090006
ENSG00000197291.8	RAMP2-AS1	3.0527944399036	1.08287965204905	0.00481518048557401	0.0752352589924515	4.088902	0.49809020227924	0.1864934	0.2569922
ENSG00000262406.2	MMP12	-3.06231164312175	1.08630991140292	0.00481729651070518	0.0752352589924515	1.63224	13.0999	179.683	36.0149
ENSG00000115461.4	IGFBP5	2.78381935694337	0.987671569599275	0.00482384109892942	0.075274202702947	287.455	38.6019633	22.613505	20.8702801
ENSG00000164039.14	BDH2	1.91144368021149	0.678211448069025	0.00482697306325496	0.075274202702947	41.35888	30.1291543	9.709286	10.8177307
ENSG00000188389.10	PDCD1	-2.4256603164239	0.861934498806406	0.00488980451858897	0.0761973330149488	1.32969	2.48536	7.828073	18.710744
ENSG00000203709.11	MIR29B2CHG	2.58354502892671	0.918192098540538	0.00489702779748278	0.0762531988168214	1.36278	1.9334954	0.10771	0.3979759
ENSG00000070614.14	NDST1	1.75993622443118	0.625710411502333	0.00491273273961106	0.0764409543351954	30.888786	30.886779	10.853798	9.4335234
ENSG00000248323.6	LUCAT1	3.23660055376414	1.15114374210906	0.00492898001019459	0.0766368635264602	17.97339812434	0.951729	0.81682036	0.7172179
ENSG00000274895.1	AC011700.1	-4.22103099025331	1.5017219505971	0.00494194216300897	0.0767814423977057	0	0	0.430276	0.165897
ENSG00000234956.6	LINC02539	-3.9715180944803	1.41327263046949	0.00495173253083773	0.0768691341694644	0.105763	0	0.436189	5.08909
ENSG00000211970.3	IGHV4-61	-3.14130889330017	1.1179234597466	0.00495492152597673	0.0768691341694644	0.604301	3.17781	9.00909	45.0879
ENSG00000101846.6	STS	2.36587642824798	0.84205133345948	0.00495941396089961	0.0768819210107211	9.05591	5.99178	0.794494	2.0395
ENSG00000076382.16	SPAG5	-2.23464587935758	0.795754351137704	0.00498176214405033	0.0771142930407318	8.010255	11.665146	37.867105	78.71744
ENSG00000198046.11	ZNF667	2.64748184358605	0.942758838407449	0.00498149317780246	0.0771142930407318	2.0769801	0.631771	0.1560283	0.2463032
ENSG00000140873.15	ADAMTS18	3.95488745658789	1.40865813522936	0.00499189054024438	0.0771571045965943	6.1771637	0.0138557	0.0331758	0.1070626
ENSG00000163737.3	PF4	3.31910355748991	1.18216381766562	0.00499042601843495	0.0771571045965943	4.72743	1.48417	0.3576	0.0991452
ENSG00000169291.9	SHE	2.4356410438665	0.867626877449982	0.00499672531361152	0.0771749195637317	12.448453	3.397382	1.488745	1.444354
ENSG00000156486.7	KCNS2	3.13072343853875	1.11599112797717	0.00502650819175842	0.0775777505088842	0.244607	0.149847	0.018885	0.0160521
ENSG00000138639.17	ARHGAP24	2.74855742852107	0.980581358742148	0.00506316097065528	0.0780859387667138	22.376937	4.8707482	3.105206	0.86533415
ENSG00000180178.10	FAR2P1	-4.3034239593905	1.5354345401616	0.00506704840919411	0.078088432064926	0	0	0.0131978	1.5331645
ENSG00000279429.1	AC004009.2	-3.95108546198324	1.41017208325769	0.00508110718719561	0.0781901068549433	0	0.151045	8.63063	0.227929
ENSG00000170369.3	CST2	-3.79021124818514	1.35268048403659	0.00507868117293921	0.0781901068549433	0	0.0727454	1.83731	1.17147
ENSG00000272769.1	AC097532.2	-2.8895331237237	1.03147386097117	0.00508871793658607	0.078249771997731	0.0635476	0.160604	1.12323	1.3576
ENSG00000183844.16	FAM3B	4.00146753571751	1.42920296263306	0.00511359307765463	0.0785746314622898	0.141133	75.9989	1.6430756	0.135804
ENSG00000185070.10	FLRT2	2.55223359467672	0.912130191756389	0.00514038277899932	0.0789284122088254	8.686004	1.888974	0.9466518	0.8117114
ENSG00000143891.16	GALM	-1.9391850789844	0.693102097771024	0.00514464388991672	0.0789360111923606	5.71868	9.196032	35.146393	36.246085
ENSG00000150672.17	DLG2	2.88302854368601	1.03086787129101	0.00516273894440346	0.0791557026596577	0.7197808956	4.3016622	0.33196464	0.2734805
ENSG00000257702.3	LBX2-AS1	-1.82444836853811	0.653051019698928	0.00521039265361066	0.0797696271928603	3.144	2.851686	15.2208	11.3297
ENSG00000135299.16	ANKRD6	2.13457758589286	0.764042822740989	0.00520937926224199	0.0797696271928603	3.913987	5.4913337917	0.894486122725	1.33506156
ENSG00000269929.1	AL158152.1	2.13114949603993	0.763094741851986	0.00522585396738444	0.0798344023255353	2.85742	3.34262	0.811227	0.690877
ENSG00000160867.14	FGFR4	-2.70634451714851	0.969057444106584	0.00522605086075836	0.0798344023255353	0.8371516	5.1700076	27.04053953382	29.719668
ENSG00000079156.16	OSBPL6	2.46971108868548	0.884311472305743	0.00522528911091348	0.0798344023255353	0.6916733	2.21655	0.2584402	0.25817431387
ENSG00000110680.12	CALCA	4.26685612196846	1.52880181062752	0.00525486295447038	0.080036001979467	1.7455139628	0.0619424	0	0
ENSG00000239713.8	APOBEC3G	-2.41369379047607	0.864762945117948	0.00525191188746135	0.080036001979467	4.873159	7.914476	23.254439	64.422865
ENSG00000186431.18	FCAR	3.67168612554318	1.31536044876063	0.00524819314764731	0.080036001979467	5.906414	0.2495683	0.2591466	0.0313559
ENSG00000267506.5	AC021683.2	3.86942423659831	1.38618537656536	0.00524774859730224	0.080036001979467	0.1047348	0.2112523	0.0100801	0
ENSG00000011478.11	QPCTL	-2.00053565548445	0.716840964150241	0.00525834127228045	0.080036001979467	3.77836	5.908539	21.536008	26.77959
ENSG00000167768.4	KRT1	4.09942895074344	1.46916331262017	0.00526567254868868	0.0800557916278784	0.0418939	8.415702	0.1299927	0
ENSG00000140279.12	DUOX2	4.01640916821285	1.43946147967408	0.00526728072211672	0.0800557916278784	0.303659	108.31872	2.33956	0.0657212
ENSG00000229474.6	PATL2	-2.39224707283696	0.857738473644228	0.00528683110883245	0.0802678669879093	2.2134715	2.149778	8.329815	21.078406
ENSG00000215912.12	TTC34	-2.38988857525208	0.856931651867099	0.0052888937597358	0.0802678669879093	0.0383897	0.0597152	0.42337	0.285316
ENSG00000142871.16	CYR61	3.37251946456426	1.20956240118199	0.00529994339280038	0.0803773614831427	702.1748	17.99742	34.08611	16.04162
ENSG00000115594.11	IL1R1	3.09631295102098	1.11093381711873	0.00531777352049252	0.0805885815756002	234.286138	13.9500488	11.3195635	12.020662
ENSG00000267706.3	AC020922.1	-3.41077576190644	1.22386202254251	0.00532156099530658	0.0805885815756002	0	0.0436844	0.566289	0.49553
ENSG00000141497.13	ZMYND15	-2.00870156753175	0.720916751827143	0.00533109454555493	0.0806746646789067	1.722534	2.180365	13.66124	6.770361
ENSG00000179528.15	LBX2	-2.7999915405187	1.00529948005848	0.00534895582231734	0.0808865548917382	1.220159	0.290106	10.782888	5.08419
ENSG00000187479.6	C11orf96	3.44735843356159	1.23861440998099	0.00538193453362812	0.0813265795892658	538.3984	9.40177	20.7607	13.050395
ENSG00000223813.2	AC007255.1	-3.50383458135342	1.25922524262648	0.00539365396449986	0.0813944807506798	0	0.382623	8.26001	1.842949
ENSG00000150764.13	DIXDC1	2.69151839943459	0.967302387924118	0.00539419503615126	0.0813944807506798	16.6826751	2.828055	1.938301	0.9760044
ENSG00000172572.6	PDE3A	2.61357514155608	0.939552917778699	0.00540713140776083	0.0815309835793232	2.91382	0.6065268	0.346793	0.217197
ENSG00000211899.10	IGHM	-3.78368878080547	1.36036043800706	0.00541271773539795	0.0815565427866323	49.66689	472.8997	175.793881	18499.3018
ENSG00000123901.8	GPR83	-2.73489560946022	0.983987424475158	0.00544592546234844	0.0819390895659446	0.0346933	0.0581942	0.511012	0.384827
ENSG00000132326.11	PER2	1.9717426852733	0.709364139925924	0.00544272818562723	0.0819390895659446	14.826432	8.844881	4.23948	2.438262
ENSG00000184185.9	KCNJ12	2.97589432294682	1.0709152444811	0.00545546110068757	0.0819987675174369	1.50925	0.203209	0.0950924	0.0848073
ENSG00000088726.15	TMEM40	4.18969431875025	1.50779021252262	0.00545771652687745	0.0819987675174369	0.2589079	154.59327	1.475937	0
ENSG00000072041.16	SLC6A15	4.23131585061996	1.52300086535087	0.00546482774241028	0.0820467941641669	0	2.4563366	0.0163147	0
ENSG00000102271.13	KLHL4	3.3689116693293	1.21275266234199	0.00547106134880248	0.0820571005358946	1.80727	0.077496	0.0506063	0.0717065
ENSG00000177822.7	AC098864.1	3.8180122055269	1.3744885329534	0.00547334446057448	0.0820571005358946	3.931587	0.1196802	0.04611	0.11304
ENSG00000143867.6	OSR1	3.48995540216304	1.25714021085992	0.00550141452638799	0.082418975738789	56.577225	1.1333778	2.758279	0.7155298
ENSG00000136859.9	ANGPTL2	3.30194634683239	1.18965423344395	0.00551082056892855	0.0825009202172668	177.04576	5.931215	9.986745	3.986988
ENSG00000116690.12	PRG4	3.87097316949931	1.39519798475411	0.00552870774144263	0.0827096256623098	17.83035205007	0.0266683	0.158684	0.329396
ENSG00000103876.12	FAH	2.82079635057794	1.01706361957183	0.00554618007480231	0.0829118318029827	131.575887	15.372499	9.168881	9.41659674793
ENSG00000108691.9	CCL2	3.4273059765926	1.23610655502406	0.00555997953237193	0.0829997229479939	1902.0528	36.079239	48.969258	68.41154
ENSG00000168398.6	BDKRB2	2.8740848394871	1.03656908490573	0.00555950369161941	0.0829997229479939	25.115784	9.516807	4.072289	0.444999
ENSG00000173068.17	BNC2	2.38601147047029	0.860797843977018	0.00557369312643171	0.083145220097425	2.80393435	1.024551	0.265881	0.4506744
ENSG00000211955.2	IGHV3-33	-3.77968602394879	1.36500714409558	0.00562310068968053	0.0838225941358566	5.75534	42.3648	12.2708	1723.64
ENSG00000197928.10	ZNF677	2.12463465437347	0.767369497312763	0.0056276216033331	0.083830363315038	5.879432	4.8163265	0.9586735	1.56807512
ENSG00000261052.5	SULT1A3	-2.14188956818188	0.774383367481807	0.00567608566214326	0.0844922438869749	3.765107	8.9053765	38.716783	33.9807681
ENSG00000101076.16	HNF4A	-3.53051809945076	1.27664928779133	0.00568431820076643	0.0845547375229692	0.0620816	4.7652918	36.4870182	82.9134744
ENSG00000156299.13	TIAM1	1.89559459963846	0.685589421887116	0.00569381080298394	0.0846358727799577	14.452726	15.040855	3.6516310183411	4.83463673
ENSG00000171916.16	LGALS9C	3.60538003690364	1.30435194504808	0.00570772501857891	0.0847225273827162	0.290857	30.795602	0.5676199	0.83989199
ENSG00000163141.19	BNIPL	3.76192448609753	1.36087743627118	0.00570385149961189	0.0847225273827162	0.1912346	66.96074	1.240394	1.12221
ENSG00000233822.4	HIST1H2BN	-2.83567274322184	1.02627016011946	0.00572576724874467	0.0849301880866522	0.1981579	0.1633591	3.70917	0.665267
ENSG00000188100.8	FAM25A	4.20074882588664	1.52174822128346	0.00577172702225252	0.0854909022327848	0	45.5183	0.321772	0
ENSG00000123342.15	MMP19	3.33313331648749	1.20738393102245	0.00576910148659854	0.0854909022327848	199.308844	5.04101	6.506225	7.601308
ENSG00000274956.2	NKAIN3-IT1	3.51514441393542	1.27378790440467	0.0057872267776188	0.0856599477627913	0.124297	0.173568	0	0.01178
ENSG00000183580.9	FBXL7	2.66789661239431	0.966997771202924	0.0057987753012947	0.0857447996701013	15.33161	2.443107	1.4880372	1.158183
ENSG00000151136.14	BTBD11	3.3188093374634	1.20308424612527	0.00580523263189435	0.0857447996701013	0.4915245	15.4680691	0.4339262	0.6760889
ENSG00000205795.4	CYS1	2.72543976546474	0.987952981817667	0.00580364781078213	0.0857447996701013	3.43797	0.686843	0.280501	0.285567
ENSG00000196611.4	MMP1	-3.14219529782271	1.1395751152337	0.00582738415364977	0.0858300382827446	3.62042	3.60651	117.032	4.59342
ENSG00000236499.2	LINC00896	-3.45579367515038	1.25328877364786	0.0058266555962799	0.0858300382827446	0.0244457	0.164485	4.37961	0.292297
ENSG00000164197.11	RNF180	2.11129871161809	0.76554677078787	0.00581746252132843	0.0858300382827446	1.081683	0.933797	0.311767	0.188312
ENSG00000178031.16	ADAMTSL1	2.25863679072375	0.819029840037334	0.00582099835534199	0.0858300382827446	4.0759059	1.5317412	0.6104782	0.5916211
ENSG00000153253.16	SCN3A	2.62212377889627	0.951182738272878	0.00583882080117439	0.0859380935195323	1.091786	0.295972300942099	0.0872231	0.12088373305349
ENSG00000117228.9	GBP1	-1.82696105464238	0.662882157514568	0.00584973926939309	0.0860383756822525	40.38997	33.873758	214.21853	120.61424
ENSG00000114790.12	ARHGEF26	2.0079985409546	0.728837722956283	0.00586796792240653	0.0862327395242857	5.76964	4.67245003	1.9934020107762	0.8960328
ENSG00000184906.11	AMYH02020865.1	3.61371165735365	1.31185348205742	0.00587529710581039	0.0862327395242857	1.746191	0.961536	0.0130401	0.154423
ENSG00000143341.11	HMCN1	2.44457934265223	0.88736633519201	0.00587153693872541	0.0862327395242857	5.73972	1.481532	0.668261	0.644715
ENSG00000139209.15	SLC38A4	3.6438403842268	1.32350681995787	0.00590210878915939	0.0864864318542196	0.2061838	3.71605	0.1699659	0.0112157
ENSG00000124256.14	ZBP1	-2.81435776324593	1.02228289973907	0.00590496130461321	0.0864864318542196	1.4357772	4.4115398	10.2267329	48.16941
ENSG00000171724.2	VAT1L	-2.20319513368133	0.800246207470048	0.00590254565354331	0.0864864318542196	0.15624	0.22939	1.17942	1.18883
ENSG00000108839.11	ALOX12	3.47505491032691	1.26247774171715	0.00591299970247464	0.0865436876844735	0.443372	27.508615	0.786349	0.821902
ENSG00000182132.13	KCNIP1	3.53442955476053	1.28474791989816	0.00594012174448264	0.0868799802111736	1.168819	0.413458	0.0785833	0
ENSG00000272449.2	AL139246.5	-2.25032829350546	0.818386272950179	0.00596472777936617	0.0870074701769715	0.599913	1.0620462	6.320276	4.201538
ENSG00000130818.11	ZNF426	1.93701026365164	0.704288029996212	0.00595389468586003	0.0870074701769715	3.565265	4.002613	0.887171	1.2146866
ENSG00000226696.5	LENG8-AS1	-2.20500242972486	0.801913897528552	0.00596544370648924	0.0870074701769715	1.373555	2.646699	13.68233	10.55834
ENSG00000126759.13	CFP	2.3406767229705	0.851152151832955	0.0059593490049353	0.0870074701769715	34.029482285	10.687781	4.0907958	4.7738356
ENSG00000268734.1	AC245128.3	3.67210584984685	1.33591269280072	0.00598208316572633	0.0871894861407915	8.02199	0.218236	0.262473	0.0732171
ENSG00000258017.1	AC011603.2	-2.56441602007681	0.933373393889642	0.00600568809213448	0.0874119560576712	116.955275	31.36229	363.6653	818.088
ENSG00000178919.8	FOXE1	4.13657409425334	1.50558192466171	0.00600529981301715	0.0874119560576712	0	10.3438	0.101781	0.0123461
ENSG00000123358.19	NR4A1	3.34408803063641	1.21748113176385	0.00601932552923751	0.0874889346513793	986.067809	27.0637867082963	55.468657601907	17.2492930237936
ENSG00000104537.16	ANXA13	-3.88608477163954	1.41478252575713	0.00601849907818358	0.0874889346513793	0	0.0312763	1.757444	0.1387679
ENSG00000196666.4	FAM180B	3.72784106608711	1.35737751426256	0.00602614440586953	0.0875273462249616	4.11828	0.066834	0.0801687	0.067717
ENSG00000165140.10	FBP1	-1.90621112535245	0.694164220576469	0.00603171815206495	0.0875476320977349	8.26769	13.955726	56.65528	48.2666
ENSG00000112182.14	BACH2	2.28049133483625	0.830625462111925	0.00604167438596379	0.0875634292077167	0.673526000342247	0.750663492296	0.0956826	0.194488
ENSG00000186481.16	ANKRD20A5P	3.77358946256617	1.37455761453599	0.00604534004788235	0.0875634292077167	0.6839789	11.857893	0	0.3570222
ENSG00000214548.16	MEG3	3.07572628819486	1.12023705359666	0.00603997923295542	0.0875634292077167	297.64449581279	16.286408952216	15.1698349	14.70534588
ENSG00000198515.13	CNGA1	2.739020882858	0.998446281607419	0.0060828205246181	0.088045466419524	0.677316	2.62955	0.234696	0.235659
ENSG00000196787.3	HIST1H2AG	-2.86231343355097	1.04381301330414	0.00610346190117346	0.0882832698320873	0.160965	0.386686	5.7688	0.844401
ENSG00000155269.11	GPR78	3.33603251844506	1.21670788551757	0.00610939278563028	0.0883081126855345	0.276705	8.5346038	0.2264667	0.358256
ENSG00000026950.16	BTN3A1	-1.92071715419967	0.700862263468466	0.00613446843125049	0.08854843240398	13.7724934	24.5660535	94.999569	87.392175
ENSG00000183762.12	KREMEN1	2.55617055897439	0.932705434654419	0.00613275080903941	0.08854843240398	9.323484	28.256236	5.2785358	1.2964194
ENSG00000274286.1	ADRA2B	2.76607316883396	1.00961052763311	0.00614872813618166	0.0886321822601317	1.47319	0.374684	0.104708	0.139701
ENSG00000177535.8	OR2B11	4.18934618881542	1.52899533583752	0.00614515374421483	0.0886321822601317	0.3802881	0.0238636	0	0
ENSG00000259207.7	ITGB3	3.26001370282062	1.19102894916836	0.00619757969483092	0.0892749641401795	20.043302	0.7275952	1.2000952	0.445752
ENSG00000133687.15	TMTC1	2.87685698555612	1.05114998040771	0.00620274917249543	0.0892880631224805	13.9645369	1.315751495	1.102785	0.73856804
ENSG00000152952.11	PLOD2	2.44632227342869	0.894061970404531	0.00621553698270007	0.0894107341251962	63.0635123	14.342946	7.091181	6.921458
ENSG00000154734.14	ADAMTS1	3.36664232634837	1.23107279518177	0.00624329072261836	0.0897483746607396	257.6782	5.77494	13.41459	4.68566
ENSG00000076555.15	ACACB	2.86209856591928	1.04702803321227	0.00626565026134266	0.0900080629386435	58.7672085	5.51594988314	4.591193221144	3.2575222
ENSG00000122691.12	TWIST1	3.41750423229459	1.25037695596146	0.00627262029747549	0.0900464717909512	41.95664	0.822551	1.983711	0.7208604
ENSG00000170989.9	S1PR1	2.97057945632472	1.08744847453624	0.00630091080930474	0.0902940768004504	87.12984	6.4307	6.592782	3.6690467
ENSG00000233608.3	TWIST2	3.27491283825049	1.1988998492653	0.00630279280304685	0.0902940768004504	28.63238	0.956166	0.909612	1.2462776
ENSG00000109101.7	FOXN1	4.04169453969377	1.47953766240245	0.00630031208131274	0.0902940768004504	0	11.241555	0.073286	0.0871165
ENSG00000185567.6	AHNAK2	3.03772068840718	1.11226792254038	0.00631223222612987	0.0903364175953028	10.820717	59.9896587	6.944758	0.73641921
ENSG00000196074.12	SYCP2	-3.33192785333208	1.22004232408101	0.00631436861382311	0.0903364175953028	0.438850000267109	1.21650830485645	35.2092748	0.87414240557231
ENSG00000163735.6	CXCL5	3.47595567608449	1.27324232038515	0.00633337006608049	0.0905464551261808	1.57321	17.8971	1.15738	0.0344412
ENSG00000206384.10	COL6A6	3.26639844054476	1.19759977523031	0.00638251328602015	0.0911868411463506	1.778419	0.1143964	0.0684901	0.0694413
ENSG00000092445.11	TYRO3	2.17138691074945	0.796364910739806	0.00639860926334566	0.0913545310289249	37.2372374	16.294197	4.925230888	7.211116
ENSG00000135253.13	KCP	2.1471920678202	0.787961666464109	0.00643023455380402	0.0917435575310949	6.198053	2.679225	1.0453999	1.0483215
ENSG00000150281.6	CTF1	2.60770313691123	0.957665132726623	0.0064695946974401	0.0922423369140457	6.91503	1.84794	1.027721	0.384794
ENSG00000185274.11	GALNT17	2.35585579070962	0.866501111210352	0.00655163378634531	0.0933485333297154	3.1707751	1.324134	0.641179	0.272084
ENSG00000008311.14	AASS	2.07228367271828	0.762767518961715	0.0065917241785566	0.0937809619728445	4.968334435848	5.51695868	0.946081422968	1.630657
ENSG00000126803.9	HSPA2	2.32765086106216	0.856821548834231	0.00659540712572035	0.0937809619728445	6.491636	22.174657	3.6827077	2.2593645
ENSG00000226025.9	LGALS17A	-3.19178008637318	1.17480077317744	0.00659026383163424	0.0937809619728445	0.0515632	0.8101448	9.401827085	4.307071
ENSG00000138778.11	CENPE	-2.41415946779907	0.889086077553446	0.00662103508794081	0.0940815419716281	0.4773271	1.535281	11.375552	4.180503
ENSG00000138678.10	GPAT3	3.02830658389151	1.11548115376149	0.0066316102703294	0.0941679672465	22.1178590394757	2.4158933918	0.51466412	1.7967216
ENSG00000148965.9	SAA4	3.03810260946699	1.11950761781634	0.00665193889513319	0.0943926792844255	3.78555	1.1021	0.293711	0.152239
ENSG00000203778.7	FAM229B	2.49860198970821	0.921070397890403	0.00667343640090687	0.0946336627378939	14.05431	4.326564	1.331436	1.811375
ENSG00000100146.16	SOX10	2.63495855992416	0.971918421457382	0.00670623694654781	0.0950344963912749	2.183551	1.0153260174	0.159951	0.2846210604
ENSG00000183722.8	LHFPL6	2.94573216287332	1.08664682048125	0.00671117925422641	0.0950402743171157	134.516321	9.7176319	9.7685112	6.2886873
ENSG00000126785.12	RHOJ	3.04624822037829	1.1241415644342	0.00673148700393661	0.0952634950138471	51.438907	3.1848309	3.944759	1.58386
ENSG00000250461.1	AC122718.1	2.24147763488782	0.827235231745781	0.00673641367462614	0.0952688894780629	31.8007	11.2637	5.10308	4.28233
ENSG00000119865.8	CNRIP1	2.95978733988134	1.09249151305799	0.00674439327305788	0.0953021678820602	56.37578	4.013536	3.254149	3.206728
ENSG00000179546.4	HTR1D	-3.78030998228191	1.39544368607082	0.00674786092547246	0.0953021678820602	0	0.120275	0.162088	4.59967
ENSG00000186417.13	GLDN	2.17332241175872	0.802317822641278	0.00675260444657038	0.0953049404684637	2.516155	1.44388810844	0.377428195799	0.526905
ENSG00000100626.16	GALNT16	3.33512932898282	1.23162047746735	0.00677064061854569	0.0954951929502686	9.757977	0.7457642	0.0665775	0.5852198
ENSG00000069702.10	TGFBR3	2.80622142630258	1.03649820504581	0.00678112778098196	0.0955145545440866	34.595125	6.7733625	4.7409560105693	0.881169
ENSG00000132386.10	SERPINF1	3.08635314882296	1.13990906973273	0.00677832307052424	0.0955145545440866	947.476341	49.1364345	34.955542	55.132845
ENSG00000116044.15	NFE2L2	1.79692469091296	0.66402197564085	0.00680739659542288	0.0957677722423429	120.503701	177.566383	55.3878852	40.191155
ENSG00000227896.2	AL731569.1	-2.11329478879327	0.781007220039303	0.0068128130356092	0.0957677722423429	0.2311	0.291049	1.54388	1.43717
ENSG00000154917.10	RAB6B	2.45370369849146	0.906798910214924	0.00681203408573324	0.0957677722423429	5.936671	1.54234820386454	0.935564	0.451354
ENSG00000279204.1	AC134043.2	3.5155917958866	1.30028760169308	0.0068571500080919	0.0963264122115269	10.8436	0.213627	0.536972	0.0853393
ENSG00000065534.18	MYLK	1.77194168735554	0.655611492350595	0.00687723209245767	0.0965438093943874	36.362649	25.971426	10.44805495134	9.6531154
ENSG00000251546.1	IGKV1D-39	-3.47042863348713	1.28422687439546	0.00688515431700322	0.0965903275301677	9.46515	99.463	92.4007	2367.52
ENSG00000181350.11	LRRC75A	-1.98675855774636	0.73536048665248	0.00689760656506623	0.0967002916369386	1.929837	1.0446652	7.30035	7.514928
ENSG00000168546.10	GFRA2	2.77113231207817	1.02594316375272	0.00691192185285915	0.0968108833172298	2.0664376	0.52920810200111	0.28247	0.0719602
ENSG00000205810.8	KLRC3	-3.30216802976175	1.22275655640772	0.00692159430490328	0.0968108833172298	0.113392	0.202125	0.577801	4.99637
ENSG00000170549.3	IRX1	3.72049395363559	1.37782950694541	0.00692859034189821	0.0968108833172298	0.284127	0.429227	0.0286702	0
ENSG00000250685.7	AC009123.1	4.20101255582881	1.55576819764489	0.00692807651127165	0.0968108833172298	0	4.848549	0.00032228	0
ENSG00000257219.5	LINC02407	4.00526683818739	1.48312579597603	0.0069223321441741	0.0968108833172298	8.75663	0	0.108096	0.0455236
ENSG00000167157.10	PRRX2	2.91169517105598	1.0786576714864	0.00694710827222443	0.0970049582128926	27.4716	2.35901	2.01542	1.41181
ENSG00000240771.6	ARHGEF25	2.1584598502063	0.799734244819651	0.00695541545470014	0.0970562932856592	19.895846	7.767871	3.010247	3.4029139
ENSG00000153233.12	PTPRR	-2.46562689369925	0.913772417203401	0.00696957980758777	0.0971892369841864	0.184805	0.4362398	3.7232898	1.3507304
ENSG00000226482.1	ADIPOQ-AS1	4.11940503631594	1.52705954103555	0.00698400382904327	0.0971963720138898	2.02351	0	0.0146255	0
ENSG00000134760.5	DSG1	4.00227493716768	1.48355642057669	0.00698083463216224	0.0971963720138898	0	10.681486	0.078257	0.0728649
ENSG00000010030.13	ETV7	-2.24035039809584	0.830360744966852	0.00697480767458474	0.0971963720138898	2.68833	7.5631966	43.851902	22.233883
ENSG00000171051.8	FPR1	2.67474513595188	0.992445503263249	0.00703663896755605	0.0978639124890559	31.899447	4.451262	2.69224	2.55912
ENSG00000118495.19	PLAGL1	2.16725994434576	0.804674154130006	0.0070740390578966	0.0981901042768506	32.753634	17.9660475	3.8670084048	7.494653
ENSG00000238260.1	AL513320.1	-3.48358608314554	1.29337334134009	0.00707250088394624	0.0981901042768506	0	0.189367	2.2807	2.27862
ENSG00000171365.16	CLCN5	-1.87212326045817	0.695095234589234	0.00707414750026454	0.0981901042768506	1.21118	2.010662	8.8870287	6.1010398
ENSG00000231062.1	AC103563.2	4.1888968158263	1.55599178035376	0.00710020997154119	0.0984866318951236	0	26.2844	0	0
ENSG00000198768.10	APCDD1L	3.45028098818418	1.28178844536039	0.00710737249845297	0.0985207805522989	1.5330137	0.4319366	0	0.0998701
ENSG00000130528.11	HRC	3.38599094327323	1.25841464951647	0.00713065875826891	0.0987782398642155	4.214739	0.1504963	0.2061328	0.0654848
ENSG00000175857.8	GAPT	2.54121484821691	0.945122989471712	0.00717166066082371	0.0990189959092254	1.4564594	3.474863	0.247556	0.545189
ENSG00000162616.8	DNAJB4	2.10969859140006	0.784581747349366	0.00716778380247203	0.0990189959092254	22.797799	8.875476	4.042049	3.6724695
ENSG00000114349.9	GNAT1	3.57406126771651	1.32917932305871	0.00716828849203207	0.0990189959092254	1.169271	0.4860742	0.0642505	0
ENSG00000100139.13	MICALL1	1.90358214772817	0.707834235788499	0.0071600966561367	0.0990189959092254	20.644122	34.741944	10.3496331	6.103346
ENSG00000183853.17	KIRREL1	2.50899397798358	0.933070169734193	0.00716737152776678	0.0990189959092254	26.0186282	5.0713308	3.507452	1.9214277
ENSG00000228314.1	CYP4F29P	3.65454310584229	1.35953447305749	0.007186327809867	0.0990988471726231	0.348622	81.8317	0.885602	2.212672
ENSG00000130948.10	HSD17B3	-2.94551971460277	1.0957799971246	0.00718690050586322	0.0990988471726231	0.5498589	0.445195	12.629796	1.12286751
ENSG00000159527.3	PGLYRP3	3.98281261245941	1.48278203764953	0.00723043230457016	0.0996335507373346	0	12.3732	0.14703	0.0413226
ENSG00000196549.10	MME	3.56228695762753	1.32633274448171	0.00723527168701578	0.0996347301499104	26.527243	0.79837056	1.340720122	0.052975100085873
ENSG00000137675.4	MMP27	3.81214135098056	1.42038696028201	0.00727742641456533	0.100083714057004	0.797603	0.0925923	0.0277456	0
ENSG00000164736.5	SOX17	3.19379980421591	1.18993726547679	0.00727456098092364	0.100083714057004	23.2866	0.79559	1.30799	0.676609
ENSG00000250133.2	HOXC-AS2	-3.4094078618419	1.27055730613112	0.00728787294322963	0.100161658371901	0.152437	0.020975	2.021091	0.71069
ENSG00000151789.11	ZNF385D	3.27203455458698	1.2196376050388	0.00730102861921587	0.100276709587251	23.497325	0.6284335	0.750245	0.9595129
ENSG00000155511.17	GRIA1	3.78441823078586	1.41075083910925	0.00730619025135429	0.10028188701908	0.2345455	0.0393235	0	0.00800374
ENSG00000144218.18	AFF3	2.26575493309702	0.845259442041769	0.00735026507651007	0.100820815273936	0.9411493	1.4232159	0.1731309801	0.29886955
ENSG00000181036.13	FCRL6	-2.9825878684583	1.11280100620932	0.00735666069992441	0.100822563199559	1.3047377	1.100545	2.275311	26.854519
ENSG00000103723.13	AP3B2	2.68774786575061	1.00285351545974	0.00736001344030367	0.100822563199559	1.0966271	1.0586172	0.0769764	0.2305562
ENSG00000151929.9	BAG3	2.42932746428532	0.9065084618388	0.00736501182397608	0.100825135740506	162.7975	54.25553	32.75731	9.221504
ENSG00000072210.18	ALDH3A2	2.0593721174701	0.768865270183808	0.00739623567034535	0.101186490479614	62.255125	147.934814	25.8927974	27.361028
ENSG00000198088.10	NUP62CL	-3.16807210141081	1.18329355760853	0.00742106106929048	0.101395227869521	0.09573248	1.401739	21.97652	4.169162
ENSG00000283154.2	IQCJ-SCHIP1	2.93246928390297	1.09529651190535	0.00742116892751777	0.101395227869521	30.6543530141759	2.2443171	2.0824727	1.5734318
ENSG00000255152.8	MSH5-SAPCD1	-2.21295811101873	0.826823817102555	0.00744051884947302	0.101593377567495	1.274735	2.905475	19.090283	7.679841
ENSG00000229035.2	SPRR2C	4.16518261169229	1.55651039211191	0.00745122436856942	0.101673314805239	0	173.167	0	0
ENSG00000211804.3	TRDV1	-3.74968590332738	1.40147738455888	0.00746126062281404	0.101677868266294	0.541923	0	1.14999	18.8293
ENSG00000135144.7	DTX1	3.03092785638754	1.13277621913903	0.00745815101662869	0.101677868266294	76.892791	6.76347	1.7093634	6.016594
ENSG00000158220.13	ESYT3	-2.32425486647842	0.868905897514949	0.00747468012903568	0.101794555441494	0.1178466	0.2071438	1.564515	0.730763
ENSG00000283440.1	LINC01260	-2.53471101420224	0.947712418471737	0.00748280237856132	0.101838996787186	0.448376	0.496546	2.30049	5.39734
ENSG00000128606.12	LRRC17	2.85008767808278	1.06583860512705	0.00749450605476989	0.101932091110916	10.4537900023335	1.120979	0.73593	0.6483296
ENSG00000072133.10	RPS6KA6	3.0507968543335	1.14161576868522	0.0075322049798788	0.102378394405499	0.1540904	0.650477	0.0202268	0.0514639
ENSG00000183691.4	NOG	3.69813634478991	1.3841346981183	0.0075444745957069	0.102412333582527	0.4455	0.234361	0	0.0237866
ENSG00000163295.4	ALPI	-3.36117437951635	1.25800162997434	0.00754374468519486	0.102412333582527	0	0.0505839	0.444419	0.8204788
ENSG00000102575.11	ACP5	-1.72412387682644	0.645548286415392	0.00756729837202917	0.102589266868926	43.963981	39.962939	163.681513	175.277545
ENSG00000105048.16	TNNT1	-2.75976581320051	1.03329513786547	0.0075661740055997	0.102589266868926	3.727676	5.8222619119702	97.891813	9.481868
ENSG00000211721.2	TRBV6-5	-3.34365828141025	1.25297190471565	0.0076172180509792	0.103066025261764	0.217469	0.380367	2.06736	8.47513
ENSG00000126583.10	PRKCG	-2.99254309114095	1.12135892593238	0.00761509833157651	0.103066025261764	0.400439	0.108036	6.5348	0.659035
ENSG00000073861.2	TBX21	-2.34445163363931	0.878477748128866	0.00761304464362076	0.103066025261764	0.815122	0.918753	2.92188	8.361058
ENSG00000047230.14	CTPS2	-1.85846495129362	0.696846287555478	0.00765395469125977	0.103496281531686	4.037443	6.099237	21.14233	24.399694
ENSG00000134250.19	NOTCH2	1.91998706927514	0.72057616031179	0.00770990838137974	0.104185667160115	23.4341712	14.3050547	4.524073	6.0461367
ENSG00000171617.13	ENC1	-2.38981928904524	0.897198477520205	0.00772988208793928	0.104388272346082	5.1341042	6.4856638	75.371331	13.9379885
ENSG00000249388.1	AC023794.2	-3.52532181951777	1.32389261872161	0.00774829256212653	0.104569519516813	0	0.244264	5.45162	1.46301
ENSG00000021852.12	C8B	3.93394521284224	1.47765634305504	0.00776116817339435	0.104608568325513	0.0256529	1.383195	0.0258651	0
ENSG00000177551.5	NHLH2	4.14517385025108	1.55699314176076	0.00776100062927527	0.104608568325513	0	1.744281	0	0
ENSG00000108759.3	KRT32	4.1440149333449	1.55702187462125	0.0077793160743068	0.104785787661566	0	5.6041	0	0
ENSG00000237187.8	NR2F1-AS1	2.53107183701748	0.951244728847505	0.00779552801597946	0.104936719130966	10.9707876	2.7174582	0.8714206215	1.320211
ENSG00000142549.9	IGLON5	3.2710005927941	1.22948004783678	0.00780305834089514	0.104970667372799	0.235209	1.63034	0.138105	0.0167344
ENSG00000114374.12	USP9Y	-4.06690384074798	1.52946641009069	0.00783649547279776	0.105083242875476	0	0.0179316	4.110455	0
ENSG00000100448.3	CTSG	3.12274979426453	1.17407545429678	0.00781981564202442	0.105083242875476	21.1121	4.46539	2.30057	0.117086
ENSG00000160213.7	CSTB	3.15387287915501	1.18603107091097	0.00783305571140824	0.105083242875476	81.872484	2649.72186	138.5779343	95.0034498
ENSG00000136514.2	RTP4	-2.49943195320962	0.939771977728057	0.00782299429977603	0.105083242875476	0.973413	3.86843	30.3634	10.2515
ENSG00000259343.6	TMC3-AS1	-3.08295114533904	1.15933489003024	0.00783168646580721	0.105083242875476	0.1082247	0.1139746	0.4292682	2.7009665
ENSG00000150893.10	FREM2	4.07812528688834	1.53433390315764	0.00786262998600425	0.105366279972291	0.00595536	0.082258	0	0
ENSG00000122779.17	TRIM24	-2.12694423627544	0.800699506677368	0.00789897984508499	0.105516073023031	3.30713	6.0508893	41.157382	14.590297
ENSG00000274605.1	AL355338.1	2.0672223395217	0.778160362057645	0.0078944613868534	0.105516073023031	7.23345	11.8878	2.07854	2.64771
ENSG00000047634.14	SCML1	-1.80861361009867	0.680711127229305	0.00788517619698685	0.105516073023031	11.7550039	7.1354514	45.4978271	37.226806
ENSG00000138606.19	SHF	2.05588197214799	0.773816249079274	0.00788841225392451	0.105516073023031	4.138519	3.1149814	0.913812	0.93349802
ENSG00000167968.12	DNASE1L2	-2.08910263423589	0.78639863504535	0.00789461305353711	0.105516073023031	0.726096	0.5049586	3.9681841	2.872212
ENSG00000071205.11	ARHGAP10	2.38433686422511	0.897788169362084	0.00791228637214822	0.105626503231755	30.3086951	11.1325197	2.2414554	5.2965918
ENSG00000165917.9	RAPSN	-2.70055698439909	1.01698452054101	0.00792014180533999	0.105638376719994	0.15033545344	0.1946487	2.502578	1.3645715
ENSG00000211695.2	TRGV9	-3.28559589529393	1.23736216496759	0.00792325627195146	0.105638376719994	0.0920426	0.0258403	0.340766	1.54674
ENSG00000116661.10	FBXO2	-2.41654351079308	0.910196577587704	0.00793157453212131	0.105682053794489	2.0810496	7.974263	55.137929	22.1911852
ENSG00000166592.11	RRAD	2.63537439125078	0.993152404295553	0.00796511980484616	0.106061592115483	17.86373	52.58515	9.77409	1.591772
ENSG00000237238.3	BMS1P10	2.81557818461559	1.06134720432326	0.0079819062411238	0.106217633592199	2.8830928	2.361886	0.6605863	0.0579847
ENSG00000276170.4	AC244153.1	2.67966356784048	1.01124976182786	0.0080526716544284	0.107091335790079	3.223476	9.600244	1.407177	0.479342
ENSG00000168298.6	HIST1H1E	-3.46516596598362	1.30792435237406	0.00806437376249283	0.107111032755442	0.168852	0	2.94209	1.15884
ENSG00000142408.4	CACNG8	-2.48356641425526	0.937365775763372	0.00806069534065896	0.107111032755442	0.055272	0.0324065	0.509813	0.188559
ENSG00000197183.14	NOL4L	-1.79156577821711	0.676443698576046	0.00808482076311473	0.107228250044525	8.9598232	6.0129307	40.3527728	25.248331
ENSG00000182103.4	FAM181B	3.69163225746188	1.39404863420689	0.0080936634176458	0.107228250044525	0.088721	0.223284	0	0.0108154
ENSG00000260633.1	AC010207.1	2.81907761134351	1.06452354869527	0.00809202079376714	0.107228250044525	1.32229	0.522317	0.190533	0.0461037
ENSG00000124942.13	AHNAK	1.97449548911841	0.745551945666978	0.00808815650617478	0.107228250044525	168.327047	160.11933	68.834583	24.847969
ENSG00000285269.2	AL160269.1	-3.25307367140613	1.22869260136887	0.00810678896438677	0.107280176559519	0.245785	0.0494408	5.7846976	0.231356
ENSG00000137875.4	BCL2L10	3.56252554147714	1.34559506127798	0.00810782001384984	0.107280176559519	0.3956826	3.43997	0	0.153341
ENSG00000269959.1	SPACA6P-AS	3.44701768634486	1.30246856278045	0.00813231110659386	0.10753634604612	0.840622	0.0526252	0.0378113	0.0107062
ENSG00000164935.6	DCSTAMP	-2.88589052966923	1.09064992577828	0.00814430112808137	0.1076269907588	0.815386	0.105259	3.69732	7.018488
ENSG00000255471.1	AP001528.2	3.38837982345442	1.2815841301199	0.00819569518079062	0.108169757741934	12.4351	0.290957	0.648549	0.168223
ENSG00000183148.6	ANKRD20A2	3.83789554718186	1.45156416727709	0.00819393452215005	0.108169757741934	0.0219103	0.522786	0	0.00897117
ENSG00000117036.11	ETV3	1.86633135197228	0.706549073570567	0.00825460238454498	0.10887867298784	26.601012	18.378165	9.249002	4.574725
ENSG00000112541.14	PDE10A	3.1999335576133	1.21160121665694	0.00826426422343052	0.108937555886088	8.616923144878	0.2195406067766	0.381679300098073	0.31227690122428
ENSG00000019582.14	CD74	-1.68200730679968	0.6370746056116	0.00828559883628712	0.109150135769794	1322.392969	1669.488732	6537.67746	5338.749029
ENSG00000099953.9	MMP11	-2.60992096267023	0.988754709569914	0.00830029326722876	0.109206432258536	1.094753	0.876912	16.719321	2.166806
ENSG00000163755.8	HPS3	-2.21385029314561	0.838651179076818	0.00829611213690834	0.109206432258536	4.266253	7.7414903	60.452903	17.41254
ENSG00000173714.7	WFIKKN2	3.29647167893579	1.2490210779318	0.0083091095033743	0.109253843212812	0.529311	0.101053	0.0139982	0.0237745
ENSG00000171049.8	FPR2	2.77204512787127	1.05064664076882	0.00832938139623625	0.10945172707443	6.4081396	0.903019	0.345488	0.568768
ENSG00000164742.15	ADCY1	2.70007430821965	1.02425164411616	0.00838542627696796	0.110072934351002	1.202633	0.1988404	0.146249	0.0556767
ENSG00000268089.2	GABRQ	3.88253445179146	1.47284764545429	0.00838715950944942	0.110072934351002	0.0079081	0.371121	0.00793379	0
ENSG00000006016.10	CRLF1	2.30321326830083	0.87412346657243	0.00841662308188197	0.110217942531225	21.01254	6.043542	3.036455	2.520832
ENSG00000183671.12	GPR1	2.41266321309225	0.915699011510811	0.0084192435704228	0.110217942531225	1.1496726	2.852687	0.3800638	0.3608747
ENSG00000225329.3	LHFPL3-AS2	-2.7181099560746	1.03142644906745	0.00840649099153934	0.110217942531225	0.1514483	0.1586704	0.989415	2.208726
ENSG00000102837.6	OLFM4	3.94433253822673	1.49684337176267	0.00841124043730964	0.110217942531225	0.104942	234.277	3.64208	0.0597212
ENSG00000105784.15	RUNDC3B	2.27254551290776	0.862730387575796	0.00843527474424014	0.1103588785047	0.772486	0.6153503	0.139795	0.145049
ENSG00000267328.1	AC002398.2	3.60972991655303	1.37096060209271	0.00846360466073935	0.1106604429722	9.62751	0.639707	0.458843	0
ENSG00000005102.12	MEOX1	2.47874157017804	0.941519760780892	0.0084708471935915	0.110686088734716	15.583216	3.00904	1.576113	1.625537
ENSG00000170577.7	SIX2	3.5560256934325	1.35188042509633	0.00852771397644152	0.111226251334573	5.28966	0.0395384	0.142139	0.100387
ENSG00000214770.3	AL161756.1	-2.82359748340852	1.07331781479441	0.00852044730507713	0.111226251334573	0.0620871	0.10259	1.393823	0.53621826
ENSG00000104951.15	IL4I1	-2.0654065405413	0.785202224087153	0.00852810658402875	0.111226251334573	3.8543646	3.1917621	12.153523	24.4643676
ENSG00000255819.7	KLRC4-KLRK1	-2.97612601998575	1.13152370704375	0.00853363426382492	0.11122912968626	0.209392	1.0307754	2.166569	13.0372
ENSG00000183715.13	OPCML	3.65011509024903	1.38825783987282	0.00855665076199223	0.111459815612551	0.117091549	0.065414449	0	0.0066586003
ENSG00000279343.1	AC127071.1	-4.05367929515678	1.54189174581516	0.00856288655291969	0.11147176351717	0	0	5.5298	0.0783377
ENSG00000113916.17	BCL6	2.3860979223615	0.907750554833984	0.00857413606815618	0.111548924799805	112.689355	23.493193	15.066933	10.986591
ENSG00000075673.11	ATP12A	4.09532947554107	1.55828645518587	0.00858637818457995	0.111638896011545	0	1.8537696	0	0
ENSG00000172752.14	COL6A5	3.60470606299693	1.37211167849617	0.00861102174353839	0.111889897534297	0.0160585	4.42573	0.0807383	0.09354229
ENSG00000249307.5	LINC01088	3.43948685548378	1.30943065407255	0.00862162727846061	0.111958293760382	1.546784	0.5418022	0.0617986	0.0674587
ENSG00000124731.12	TREM1	3.2652543723855	1.24355171314768	0.00864586065172527	0.111981549195384	20.679222	0.6286187	1.1136043	0.44644
ENSG00000276855.1	AC015922.3	2.53422320164534	0.965102485172575	0.00864305713338174	0.111981549195384	17.7289	4.17216	2.4498	1.22756
ENSG00000103489.11	XYLT1	2.35546772152016	0.897119764164286	0.00864992100548954	0.111981549195384	10.428336	2.401989	1.540029	0.999954
ENSG00000225697.12	SLC26A6	-1.84422780446564	0.702332002697557	0.00864295296525086	0.111981549195384	5.685136	9.529542	33.435726	34.599862
ENSG00000139433.9	GLTP	2.72109530516546	1.03637850641787	0.0086501325515209	0.111981549195384	26.8058672	263.917769	21.409773	18.513849
ENSG00000130037.4	KCNA5	2.73817121449334	1.04306919558023	0.00866210174966192	0.112067278130348	0.834508	0.304743	0.0912644	0.0619473
ENSG00000235162.8	C12orf75	-2.22408772015752	0.847461826931335	0.00867991005189471	0.112163399575363	8.01025	24.507254	141.291043	67.8442721
ENSG00000173253.15	DMRT2	3.68353495089021	1.40357341586418	0.00868023446305827	0.112163399575363	3.4473353214	0.12762869	0.114807	0
ENSG00000177469.12	CAVIN1	2.7727099629954	1.05684383406876	0.00870120676311859	0.112365121717931	475.502	47.3461	49.6016	20.2489
ENSG00000204616.10	TRIM31	-3.31304167389121	1.26290619832333	0.00870704438760291	0.112371270517099	0.2414556	21.6875646	273.152468	190.64038
ENSG00000102468.10	HTR2A	2.97235980095367	1.13364199381402	0.00874266329064502	0.112563915624018	1.192901426	0.164986	0.0715823	0.0707094
ENSG00000172016.15	REG3A	3.48040881598315	1.32764436421154	0.00875458679911166	0.112563915624018	0.318375	56.723785	1.363825	1.462588
ENSG00000160951.3	PTGER1	2.80868987834191	1.07112339288072	0.00873665108315399	0.112563915624018	0.693606	0.975313	0.116983	0.0658903
ENSG00000240498.7	CDKN2B-AS1	-2.39274192335879	0.912632347438522	0.00874660586734837	0.112563915624018	0.4891969108211	0.2056011	2.253892	2.7883161
ENSG00000175093.4	SPSB4	3.69995751905619	1.41113121848938	0.00874206179535989	0.112563915624018	1.54765	0.0292569	0.0306378	0.0259291
ENSG00000196754.10	S100A2	3.89065443905244	1.48424729651742	0.0087595661235161	0.112563915624018	5.417071	3180.8945	60.30651	0.4724780135845
ENSG00000261971.7	MMP25-AS1	-2.20161658412007	0.839858118905158	0.00875656218825884	0.112563915624018	7.713022	7.8018461	23.955369058	65.913362
ENSG00000248751.6	AC004997.1	2.57892111711081	0.984107574571688	0.00877833432108202	0.112735973673749	0.832399	2.551784	0.405002	0.151089
ENSG00000174807.3	CD248	3.30022293360554	1.25993604955384	0.00880955717841179	0.11306767232231	268.523	3.62966	11.5357	6.96648
ENSG00000067798.15	NAV3	3.01404527110362	1.15275034114856	0.00893174358980515	0.114565736780126	3.7498048	0.38815830519376	0.0779904	0.303265
ENSG00000231259.5	AC125232.1	4.03606968505871	1.54405956062482	0.0089506341651158	0.11473782352701	1.58414	0.0166334	7.41879e-07	0
ENSG00000215483.10	LINC00598	3.12987557341914	1.19767201687457	0.00896727057186191	0.114787148364519	2.8668919	0.1764541	0.0895815	0.1524714
ENSG00000160180.15	TFF3	-2.34917467053896	0.898856960230504	0.00896165809865555	0.114787148364519	38.2666	26.09342	401.79616	76.88292
ENSG00000189367.14	KIAA0408	2.01156409892529	0.769782024782075	0.00897091221055789	0.114787148364519	1.8915711	1.4085289	0.383316	0.4783455
ENSG00000172738.11	TMEM217	2.43182529882417	0.931126538154719	0.00900926740478454	0.11520664971321	5.829703	2.363958	0.9572175	0.55768437
ENSG00000234983.1	AC010132.2	-3.61769689165062	1.3852964690797	0.00901469085021539	0.11520664971321	0	0.0495998	0.592494	1.13621
ENSG00000162599.15	NFIA	2.02976296189869	0.777356161944296	0.0090248685234023	0.115266434723942	27.0753676	10.911847	6.197149	3.8463535
ENSG00000171611.9	PTCRA	-3.20861080679139	1.22909924193086	0.00903998140002197	0.115389141390414	0.167358	0.0451738	1.11473	2.0264362
ENSG00000102409.9	BEX4	1.84335120001199	0.706261721655339	0.00905391847689428	0.115496699547917	18.985	27.16874	6.189608	7.6303600413898
ENSG00000185269.11	NOTUM	3.43564648302161	1.3166743794352	0.00907179928307032	0.115584097978037	0.07638	3.351924	0.156136	0.0378187
ENSG00000082397.17	EPB41L3	2.29666006508876	0.880141415298003	0.00906954121847967	0.115584097978037	52.08535976	14.1518754	5.51907038214713	7.7648888
ENSG00000112877.7	CEP72	-2.12585638285852	0.814954437275721	0.00909244497305437	0.115617616613991	0.892925	2.36377	9.98496	8.759139
ENSG00000143473.12	KCNH1	3.72814878307511	1.42950969816412	0.00910752827089551	0.115617616613991	0.395049	0.0681587	0	0.012410733588
ENSG00000144649.8	FAM198A	3.02373906326806	1.1591242435235	0.00909025446338954	0.115617616613991	7.014044	0.5601221	0.162419	0.523878
ENSG00000227191.8	TRGC2	-2.80166792918911	1.07385725964351	0.00908135838075175	0.115617616613991	2.27686	2.82202	5.02416	46.5101
ENSG00000215388.3	ACTG1P3	-2.70753495337854	1.0380913758389	0.00910235921301673	0.115617616613991	0.10279	0.260909	1.98359	1.5834
ENSG00000177875.4	CCDC184	2.66589152281616	1.02208974432048	0.00909997117349266	0.115617616613991	0.417995	1.20207	0.110795	0.112716
ENSG00000138135.6	CH25H	2.78598859586653	1.06853792816835	0.00912619459602051	0.115784450688858	17.9675	6.99409	0.352059	2.5725
ENSG00000107186.16	MPDZ	2.58318959759946	0.991061027838126	0.00914757809083659	0.115958311686453	18.30401927	2.5654567	1.9894647	1.320650591971
ENSG00000087128.9	TMPRSS11E	3.98197377526307	1.52803252942137	0.00916202892088202	0.115958311686453	0.04869	58.5598	0.56436	0
ENSG00000065325.12	GLP2R	3.76140113882535	1.4433041951298	0.00915785945786905	0.115958311686453	3.975587	0.0905501	0.149661	0
ENSG00000275294.4	LINC02340	-4.00644900506863	1.53732460924892	0.00915749649961897	0.115958311686453	0	0	0.242231	4.3219
ENSG00000205611.4	LINC01597	-3.59636329094841	1.38056237927587	0.00918745915156486	0.116144406736326	0	0.0741376	2.71864	0.0942874
ENSG00000166912.16	MTMR10	1.81292656571428	0.695944981298285	0.00918781556223237	0.116144406736326	15.5631143	22.9739722	5.336669	6.4824347
ENSG00000108852.14	MPP2	2.25104886067295	0.864494234152394	0.00921720326244899	0.116286897593073	0.911078323	0.9545770783	0.3082741206	0.1053173385
ENSG00000256802.2	AC022613.1	-3.12342301602867	1.19949565815366	0.00921570300750921	0.116286897593073	0.434938	0.153057	8.16654	0.610282
ENSG00000169760.17	NLGN1	3.30052597405171	1.26760988937152	0.00922128077673973	0.116286897593073	0.501898	0.2508392	0.0839242	0.00823432
ENSG00000142173.14	COL6A2	2.85036564395712	1.09460967286554	0.00921422518617604	0.116286897593073	981.88054	68.744346333	83.66053632324	43.091436
ENSG00000184903.9	IMMP2L	1.89043490651018	0.726286557689148	0.00924449908030967	0.116369643377904	16.166186	9.359904	4.2387547	3.2737541
ENSG00000235097.1	LINC00330	4.05869945928827	1.55929206251017	0.00924357737219481	0.116369643377904	0	3.71407	0	0
ENSG00000142224.15	IL19	4.01698584078666	1.54311972867161	0.00923691340278845	0.116369643377904	0.0605386	1.930322	0	0
ENSG00000140092.14	FBLN5	3.0229680071091	1.16160256736956	0.00925706743429205	0.116447250227532	200.77274	9.468741	6.49128	12.87222
ENSG00000213853.9	EMP2	2.70212071038548	1.0383836961998	0.00926177614052658	0.116447250227532	36.050666	73.05648	15.000675	1.4178009
ENSG00000124143.10	ARHGAP40	3.70000436447553	1.42231197206595	0.00928437481355549	0.116591498931881	0.0178605	16.911093622	0.360963	0.1807345
ENSG00000235098.8	ANKRD65	2.46216628481756	0.946443278063514	0.00928187529057721	0.116591498931881	8.5342353	11.52548	3.278771	0.505773
ENSG00000126453.9	BCL2L12	-1.68746765480923	0.64882867658691	0.00930091521346878	0.116729270634187	13.9443	17.1508284012829	71.176111	53.676473663684
ENSG00000187144.11	SPATA21	-3.99483187645454	1.53662970090153	0.00932954457891901	0.11701850678011	0	0	0.0604536	0.8833382
ENSG00000183134.4	PTGDR2	3.2803632294181	1.26212054696678	0.00934716219532529	0.117169361514248	0.228028	2.32691	0.17703	0.0150217
ENSG00000178662.15	CSRNP3	3.04692679182833	1.17253789500736	0.00936117949920211	0.117274931932921	0.045257869316	0.557505100383165	0.03298649969	0.02105175223
ENSG00000240225.10	ZNF542P	2.19836633276271	0.84608083838662	0.00936883802099667	0.117300762295143	9.321874907	3.208845	1.192571	1.5610580090751
ENSG00000101134.11	DOK5	3.48306785775346	1.34200906939551	0.0094477302980012	0.118217898098989	22.5894800008305	0.0950315	0.619974	0.479427
ENSG00000166582.9	CENPV	-1.8860092972003	0.726837153779978	0.00946413345168363	0.118235015553402	21.183765	21.693485	73.889493	120.505505
ENSG00000165804.15	ZNF219	1.6454533399656	0.634147581560114	0.00946602204774122	0.118235015553402	33.3397881	32.4482212495	13.8393843	9.8338166
ENSG00000167680.15	SEMA6B	2.79283265761103	1.07629034142113	0.00946269225464061	0.118235015553402	52.68229	4.413965	4.980725	2.36171
ENSG00000046889.18	PREX2	2.56324349791155	0.98797384227563	0.0094743853838172	0.11826899538977	3.5901108	0.6044476	0.4835266	0.206236
ENSG00000221869.4	CEBPD	2.1485973314749	0.828343715464415	0.00949085552303976	0.118404071968685	179.27	58.3556	24.9269	29.7942
ENSG00000104154.6	SLC30A4	1.93194507715242	0.744956790692078	0.0095041766217409	0.11849972505358	2.66485	3.34225	0.63527	1.010105
ENSG00000279747.1	AC130456.6	-3.97968543370055	1.53478974412614	0.00951471638188944	0.118560606806195	0.0133622	0	3.07452	0.169508
ENSG00000140853.15	NLRC5	-1.72259708694006	0.664411180226507	0.00952348715311661	0.118599386358985	32.4135598151	47.0796969087787	165.7831339	158.399496
ENSG00000165868.14	HSPA12A	2.89881094031038	1.11827721247663	0.00953611532697194	0.118615692070033	25.82450074247	1.909831	2.46983301	0.758546
ENSG00000119125.16	GDA	-3.25510391501227	1.25567773006762	0.00953342706100292	0.118615692070033	0.0310237343	1.81359378063	27.828262	9.9601349307
ENSG00000174946.6	GPR171	-2.60073473802285	1.00353324122176	0.00955368628698217	0.118763766837995	1.111125	2.982882	6.42384	27.73834
ENSG00000139800.8	ZIC5	-3.96838215771197	1.53140722465743	0.00956056420395122	0.118778817516665	0.0106356	0	0	1.69688
ENSG00000173821.19	RNF213	-1.82191250467042	0.703172728507718	0.0095700669077528	0.118826440947625	35.829251	64.73708	228.564143	216.241001
ENSG00000181652.19	ATG9B	1.92324797727995	0.742411594636407	0.009582509267795	0.118852518512961	7.5140572045	11.874389505	2.3682147248	3.055999809
ENSG00000196476.11	C20orf96	-1.76514463315754	0.681390030807274	0.00958350857802871	0.118852518512961	3.7146380182374	5.39561	22.17904	16.788090731893
ENSG00000215914.4	MMP23A	2.56467108621379	0.990393556094969	0.00961021834483839	0.119113285800986	14.452	3.94565	2.44614	0.611161
ENSG00000148357.16	HMCN2	2.80182316804446	1.08214169776434	0.00962142090723199	0.119157688642031	8.868478	3.05854	0.1592629	1.2066519
ENSG00000120885.21	CLU	3.08321646654467	1.1908853082866	0.00962517137606557	0.119157688642031	1911.833376	295.3529732	202.163449	10.978935
ENSG00000136881.11	BAAT	-3.41958235543471	1.32122423157249	0.00964811080684675	0.119371165525798	0.114863	0.0997268	6.090293	0.0507046
ENSG00000132840.9	BHMT2	2.96186961731553	1.14520627090085	0.0097006888276205	0.119950877367609	21.57027	1.515423175594	0.64329	1.6008644
ENSG00000172987.12	HPSE2	3.16306196650633	1.22380299660312	0.00974872368773564	0.120473761657577	0.189808	0.9760238	0.0921044	0.0115699
ENSG00000174175.16	SELP	3.05948123284518	1.18400201239313	0.00976570034643669	0.120612441697682	33.635234	4.570567	0.294071	2.886362
ENSG00000025039.14	RRAGD	2.09185547392903	0.810226986171528	0.00982825042665339	0.121313486862325	9.3628	23.0094	3.225551	4.56838
ENSG00000158258.16	CLSTN2	3.40819876813669	1.32076954610832	0.00986675345413979	0.121717060415136	4.884286	0.1444776	0.284039	0.0143888
ENSG00000280241.3	AC079298.3	3.77278126346591	1.46306900143965	0.00991796947176086	0.12215551787417	2.41459	0.1127701	0.0568734	0
ENSG00000241794.1	SPRR2A	3.9088116526402	1.5156620453251	0.00991020720950337	0.12215551787417	1.37703	2813.14	37.263	0.157594
ENSG00000204420.9	MPIG6B	2.42682464633957	0.941135610023949	0.00991978106884091	0.12215551787417	0.880278	0.7553058983	0.216223	0.09246416225
ENSG00000113209.8	PCDHB5	2.70037866135442	1.04748892813853	0.00993871206661747	0.122316774048289	1.35326	0.2673083	0.116863	0.112984
ENSG00000228709.1	LINC02575	-3.4049295762383	1.32231863284554	0.0100249051795887	0.123305157076878	0.1317	0.223561	9.87027	0.16924
ENSG00000170290.3	SLN	3.79439069692934	1.47369249970146	0.0100312379592843	0.123310684098909	13.431285	0.0763977	0	0.230534
ENSG00000281103.1	TRG-AS1	-2.34936687619808	0.912859085329923	0.0100636127736884	0.123636143097148	0.958957	1.033857	3.11644	10.23591
ENSG00000100228.12	RAB36	-1.8836611798808	0.732153587824279	0.0100888868093454	0.123874035522595	1.586013	0.85981	6.8078095	4.7248964
ENSG00000149294.16	NCAM1	2.19351070744909	0.852670596496165	0.0100961620267984	0.123890784496293	3.762248	1.9211706	0.4043259	0.8204201032
ENSG00000130208.9	APOC1	-2.8138834853848	1.09436825226872	0.0101335057753145	0.124276271237459	101.568337	14.698742	226.46747	992.254744
ENSG00000240204.2	SMKR1	-3.18698961401716	1.24003111560376	0.0101672560116855	0.124617262426267	0.168672	0.607258	14.62539	0.709506
ENSG00000271811.1	Z97200.1	3.46072129947812	1.34680823254843	0.0101824104281159	0.124730064385085	6.76862	0.0644636	0.30903	0.0436329
ENSG00000086289.11	EPDR1	2.66279856742009	1.03690869431523	0.010228230690713	0.125129298976866	24.037607	2.56002	1.87976	1.87971
ENSG00000132510.10	KDM6B	2.44576123036531	0.95245197876495	0.0102329127556824	0.125129298976866	109.3359636	17.951134	13.123754	9.632586
ENSG00000273272.1	U62317.4	-2.39642504197906	0.933233516262882	0.0102324670863452	0.125129298976866	2.03906	1.61413	10.3585	15.425
ENSG00000214575.9	CPEB1	2.88306582935319	1.12330761427174	0.0102705092139363	0.125515803273989	1.435325	0.6926711	0.0353469044941	0.1880249
ENSG00000187608.9	ISG15	-2.3779558025216	0.926665518751497	0.0102836560877512	0.125603233067119	41.391643	28.06031	460.187106	76.20582
ENSG00000007237.18	GAS7	2.44234501047594	0.951980095673117	0.0103014720357641	0.12567436111617	38.2931335	7.6093922	2.939796	4.9615398
ENSG00000169515.6	CCDC8	1.92962962526734	0.752086633586741	0.0102967466520763	0.12567436111617	1.35888	1.472352	0.381298	0.404591
ENSG00000285816.1	AP000944.2	3.46720154201825	1.35178550606655	0.0103204026968683	0.125758907048642	2.93288	0.351623	3.18705e-07	0.137571
ENSG00000070808.15	CAMK2A	3.36009874937176	1.30998978370902	0.0103181490375001	0.125758907048642	2.3996575	0.0802207	0.0185047	0.1185954
ENSG00000107593.16	PKD2L1	-2.58686686113762	1.00908754561868	0.0103601718226181	0.12617015760038	0.2313465	0.1799863	1.2157409	2.33103563
ENSG00000134193.14	REG4	-3.72281231023718	1.45305614127454	0.0104054311224479	0.126489287648598	0	1.9543593	112.96023	2.632155
ENSG00000147883.10	CDKN2B	1.92844748024772	0.752744925494972	0.0104105167800864	0.126489287648598	17.94089	32.50978	5.756758	8.166992
ENSG00000260027.4	HOXB7	-2.11751656077734	0.826367505604516	0.0103939759022248	0.126489287648598	4.86068	1.62739	22.00108668491	15.3197
ENSG00000262655.3	SPON1	2.50503597681058	0.977800786971515	0.0104098792314866	0.126489287648598	31.61453	5.53226	2.199578	3.80412
ENSG00000138449.10	SLC40A1	-1.70466482751631	0.66555233714365	0.0104287747439847	0.12663771139002	22.257882	26.4277243	88.329106	105.363292
ENSG00000243789.10	JMJD7	2.19922144762224	0.859376931248621	0.0104947081826981	0.127364556341152	5.806616	17.359334	2.4096734	2.729483
ENSG00000198467.14	TPM2	1.8124255030266	0.70833178980882	0.0105057133236079	0.127410825516315	260.326532	141.095102	62.039619	61.725205
ENSG00000100302.6	RASD2	2.40836811569494	0.941298406524782	0.0105106788166281	0.127410825516315	3.04106	0.71513	0.413475	0.288377
ENSG00000006071.13	ABCC8	3.38000701220448	1.32142258499441	0.0105320078497834	0.127595579493417	1.74783463282	0.6703175	0.1854966	0
ENSG00000167646.13	DNAAF3	-2.95303134054573	1.15486165169641	0.0105566052052603	0.127819692950347	0.4647401	1.1487838	22.139815	1.191977294554
ENSG00000159197.3	KCNE2	3.42605996381171	1.34009033738903	0.0105704084024154	0.127912927082115	0.14304	4.0213	0.168295	0.0472309
ENSG00000261272.1	MUC22	3.72133204894042	1.45594584065254	0.010589681316349	0.128072204679376	0.0162316	0.265261	0.00814266	0
ENSG00000159167.11	STC1	3.13368509983914	1.22660167215023	0.0106257997833156	0.12843491214447	95.229383	2.1145727	5.7473493	2.41679
ENSG00000261863.1	LINC01996	-3.69199627286626	1.44553647845604	0.0106472923819895	0.128557051631928	0	0.0740275	0.088821	3.11081
ENSG00000186074.18	CD300LF	-1.90682916608166	0.746593973709368	0.010648172223533	0.128557051631928	2.64577	2.115817	8.608234	13.430014
ENSG00000137691.12	CFAP300	2.89090749323717	1.13244463874938	0.0106860074258264	0.12892908591593	3.569439	0.65141	0.119165	0.323034
ENSG00000166265.11	CYYR1	2.30037206913658	0.901177127862334	0.0106912902009584	0.12892908591593	20.475569	5.18841	3.66333	1.70739
ENSG00000225670.4	CADM3-AS1	3.07119910227386	1.20345939207348	0.0107113994848364	0.129097270604898	2.09669	1.29329	0.0115957	0.259405
ENSG00000221887.5	HMSD	-2.72811651289016	1.06910522811219	0.0107175557446692	0.129097270604898	0.1391679	0.1704863	2.82574	0.696588
ENSG00000152582.13	SPEF2	-2.09571572770353	0.821564277556346	0.0107449873233395	0.129353353997629	0.4870112	1.0307934	6.1495372	2.6486427
ENSG00000274641.1	HIST1H2BO	-3.91443358309087	1.53513875327033	0.0107757188738844	0.12964884723177	0	0	7.92923	0.649215
ENSG00000145687.16	SSBP2	1.88301880394929	0.738710549633429	0.0108013174145332	0.12988227865244	24.3379166	38.806268	7.47608	10.6202659
ENSG00000133026.12	MYH10	2.21557611675306	0.869632135088466	0.0108430556515234	0.130309405619426	11.848127	3.474896	1.354990467	1.92231100026676
ENSG00000233013.10	FAM157B	2.89513133065446	1.13660893222465	0.0108601839903882	0.130440456306331	0.752382	2.446254	0.32386	0.07440180158557
ENSG00000048342.15	CC2D2A	2.06477638344061	0.811160300029486	0.0109133756218935	0.131004260973234	8.85290500858716	4.5379121	1.2741115	2.0012335
ENSG00000186603.5	HPDL	-2.39993923735645	0.943717551026486	0.0109883397972789	0.131753211562453	0.39537	1.91566	7.52325	9.54535
ENSG00000164318.17	EGFLAM	3.32806431698949	1.30867234866812	0.0109878664635021	0.131753211562453	57.72264	1.21760900025485	3.5278437	0.299388
ENSG00000280077.1	AL353763.2	-2.10134145164576	0.826666955804295	0.0110237703093838	0.132102459642296	1.05125	3.05025	11.5265	11.5093
ENSG00000173227.13	SYT12	2.90320516048097	1.14255356542693	0.0110542408161452	0.132391904723193	3.6630649	0.5930915	0.4425294	0.0550832
ENSG00000101412.12	E2F1	-2.24341227906543	0.884443348117718	0.011195888750679	0.133935292423219	1.55611	6.38345	30.4063	21.1883
ENSG00000112782.16	CLIC5	-2.43587091875884	0.960278718012464	0.0111925473052866	0.133935292423219	5.1986307	1.109189	15.229881	31.0840101
ENSG00000073910.21	FRY	2.05667841078814	0.811019302071287	0.0112153006144544	0.134090978652795	15.7507125	5.65402094544139	3.390104519579	2.09963461940923
ENSG00000198680.4	TUSC1	2.4635902136225	0.971655692030476	0.0112301048715854	0.134191429876601	25.7256	7.70632	1.30839	4.15121
ENSG00000274020.2	LINC01138	-1.89101796293088	0.746481605610737	0.0113013156449627	0.134965398634059	3.1710226	4.6412514	14.9364949	20.8884745
ENSG00000211685.3	IGLC7	3.72189689847302	1.46985951241085	0.0113367213596793	0.135229791097914	0	95.6192	1.20519	0.990119
ENSG00000198488.10	B3GNT6	3.77032937467685	1.48899530652616	0.0113372017487327	0.135229791097914	0	5.805305	0.103072	0.0174821
ENSG00000270393.1	AC000095.1	-3.18833314554294	1.25923700776099	0.0113428108569175	0.135229791097914	0.0593435	0.163934	3.94463	0.455447
ENSG00000259417.2	CTXND1	2.52405315342163	0.996984020438051	0.0113514728352933	0.135256122316607	0.261224	0.195209	0.0566508	0.0180661
ENSG00000261094.2	AC007066.2	-1.80519917759684	0.713151706375664	0.0113641394393591	0.135330112789504	1.523791	1.665413	7.01752	6.93046
ENSG00000221944.7	TIGD1	-1.97886865246091	0.782199671555699	0.0114102646051624	0.135426580590151	0.785879	1.85949	7.52943	6.03874
ENSG00000166147.13	FBN1	3.02290388150223	1.19489199478582	0.0114109565970305	0.135426580590151	219.356291	6.075885	12.174953	8.861719925
ENSG00000229816.1	DDX50P1	-3.21957854119632	1.27213959059361	0.0113790563064466	0.135426580590151	0.0214501	0.018057	0.281478	0.403152
ENSG00000267002.3	AC060780.1	-1.92554063243774	0.761118938980639	0.0114101094185766	0.135426580590151	1.7692599	4.039064	16.542854	11.959521
ENSG00000277013.1	AC008556.1	3.12999585727314	1.23722405023178	0.0114110091761156	0.135426580590151	0.2305	5.58051	0.387342	0.109378
ENSG00000146555.18	SDK1	2.35316147107476	0.930155093302399	0.0114108289564184	0.135426580590151	4.933302	1.0094634964351	0.64737090753483	0.50632706041
ENSG00000174939.10	ASPHD1	-3.26212009359646	1.29026818110489	0.0114632803567497	0.13556945021795	0.7034281186	1.358045	46.81648	0.437209
ENSG00000164929.16	BAALC	2.77197296633489	1.09647393409666	0.0114688470934086	0.13556945021795	3.916096	0.479431	0.1949718	0.33398
ENSG00000169507.9	SLC38A11	2.2218236644167	0.878476994769776	0.011433040768121	0.13556945021795	0.730815	1.28670193221	0.3139483	0.148028
ENSG00000149798.4	CDC42EP2	3.01965106962721	1.19412251772338	0.0114465775137813	0.13556945021795	172.239	5.11754	11.1296	5.76237
ENSG00000273151.1	AC073957.3	-2.25892709557616	0.893645258685255	0.0114790467290294	0.13556945021795	0.611717	1.91214	12.8077	4.39282
ENSG00000126545.13	CSN1S1	3.95166047866242	1.56325276535335	0.0114765049688237	0.13556945021795	8.0694	0	0	0
ENSG00000049323.15	LTBP1	2.31856297606344	0.917262162935544	0.011481262185069	0.13556945021795	34.238133	8.3354468	3.054338	5.1371885
ENSG00000277991.4	FP236241.1	-2.02066132892845	0.799314530692044	0.011471672477595	0.13556945021795	0.84709	0.454672	5.0339854	2.0441925
ENSG00000197444.9	OGDHL	-3.59254982683194	1.42082460516015	0.0114552277836172	0.13556945021795	0.0148247	0.0622116	0.0149018	2.855390905974
ENSG00000147113.16	CXorf36	2.55616735607915	1.01147520744744	0.0114986619879095	0.13569845529538	33.86098	4.189058	3.89615	2.226484
ENSG00000116132.11	PRRX1	2.9500284478095	1.16920670910975	0.0116324467431343	0.137200028862888	62.63608	2.3354373	4.258597	2.4479058
ENSG00000132297.11	HHLA1	-2.87698345107569	1.14042345590203	0.0116446904608565	0.137223016639774	0.0683862	0.536638	1.47778	5.56742
ENSG00000123091.4	RNF11	1.72040364070122	0.681983214099032	0.011647490176161	0.137223016639774	67.97673	53.8753	27.4837	14.284556
ENSG00000160791.13	CCR5	-2.38883604809818	0.947091032730998	0.011659431059829	0.137286525608402	1.74236	3.87498	8.23097	30.6197
ENSG00000164418.20	GRIK2	3.33489117399981	1.32238536079554	0.0116731031820431	0.137370336660551	0.103196	0.3981612	0.0118971	0.0225994
ENSG00000198429.9	ZNF69	-1.8997726872771	0.753430024219651	0.0116856168685435	0.137440428702471	1.4198853	1.724391	10.361319	4.934986
ENSG00000232450.1	AL133517.1	-3.06472124241817	1.2158200764084	0.0117120679807791	0.137597103592573	0.0853403	0.145491	1.22488	1.90365
ENSG00000211966.2	IGHV5-51	-2.83295220172506	1.12382024646139	0.0117080646935622	0.137597103592573	3.69697	30.6195	69.6012	307.553
ENSG00000284716.1	AL034417.3	3.27700745336773	1.30064068988952	0.0117510544098125	0.137977786764852	2.51174	0.235836	0.130605	0.0476779
ENSG00000248898.1	AC022126.1	-3.88405716270023	1.54297710214389	0.0118275296719791	0.138608070756837	0	0	0.245189	3.77033
ENSG00000198821.10	CD247	-2.12614954132712	0.844768827065141	0.0118411965658943	0.138608070756837	3.229147	6.56449	17.316471	37.045273
ENSG00000147872.9	PLIN2	2.9347086443918	1.16604808205616	0.0118426369015546	0.138608070756837	343.733911	13.634429	14.897129	20.9461489
ENSG00000092621.12	PHGDH	2.40697765652928	0.956384756292416	0.0118444131268426	0.138608070756837	40.868715	49.664749	2.6016823	12.811658854
ENSG00000161958.10	FGF11	2.63425760597713	1.0466459036329	0.0118407024581573	0.138608070756837	2.22295529	8.668378	0.276884	1.205811
ENSG00000205846.3	CLEC6A	-2.90503333206387	1.15426177809215	0.0118429733471856	0.138608070756837	0.0635476	0.0535346	0.57766	0.733103
ENSG00000231419.6	LINC00689	3.59914145035778	1.43027619681602	0.0118561850303	0.138668405161862	0.2969992	0.0449361	0	0.0111136
ENSG00000196890.4	HIST3H2BB	-2.62923261698996	1.04505795700568	0.0118738115216218	0.138797108578734	0.0435737	0.219763	1.55796	0.948795
ENSG00000181126.13	HLA-V	-3.14826402448984	1.25172552014064	0.0118985367311326	0.139008601643148	0.0609296	0.102955	3.191856	0.0785718
ENSG00000279355.1	AGPAT4-IT1	2.6656909944201	1.06070436346289	0.0119664258216672	0.13964605723626	1.85297	0.42538	0.169962	0.143908
ENSG00000285517.1	LINC00941	-2.79799578500428	1.11330139991752	0.0119627258548326	0.13964605723626	0.3123336	0.20234283	6.092228	0.400192126
ENSG00000181790.11	ADGRB1	2.01538134557911	0.802356116531754	0.0120107278973537	0.140048302969618	0.8752876	1.552212	0.3574332	0.27465485
ENSG00000170390.15	DCLK2	2.45258750956799	0.97645533263809	0.0120142587308256	0.140048302969618	4.628247	0.810059	0.5565844	0.3975557
ENSG00000283236.1	AC074141.1	-1.87401170671053	0.74646760075062	0.0120558128713241	0.140454575858856	0.388204	0.502163	2.0541	2.04583
ENSG00000124785.8	NRN1	2.9084301514363	1.1587970866521	0.0120775583258229	0.140629747194957	39.76283	2.439986	1.135327	3.076787
ENSG00000260442.5	ATP2A1-AS1	-2.85510457455392	1.13847656977717	0.0121475432485056	0.141334112208047	0.140675	0.485539	5.70885	2.575485
ENSG00000272491.1	AL109659.2	2.76132024059928	1.10113095527315	0.0121515372965743	0.141334112208047	0.538127	0.618407	0.082024	0.0677854
ENSG00000166634.6	SERPINB12	3.91967632956789	1.56332363587913	0.0121667321307016	0.141432356476636	0	4.71569	0	0
ENSG00000125826.20	RBCK1	-1.68000436986763	0.670114417543428	0.0121746562990858	0.141446020716485	66.50670015544	67.0808988176	357.71967565747	186.525371909423
ENSG00000166473.17	PKD1L2	3.05822005008939	1.21999986683661	0.0121850987301017	0.141488910960776	7.4325735	0.31616585	0.5707512	0.13429345
ENSG00000135596.17	MICAL1	-1.71545379844108	0.684652190419066	0.0122249243007875	0.141872751063237	13.332194	22.0716206746	77.1645860036305	67.699826
ENSG00000278962.1	AC092645.1	2.8061046055109	1.12024293610323	0.0122483522299924	0.141987397338723	1.20583	0.248671	0.091684	0.0777158
ENSG00000176771.16	NCKAP5	2.13827270365418	0.853577029837536	0.012242614984918	0.141987397338723	1.186283	2.6522444	0.6277658	0.3044372
ENSG00000127920.5	GNG11	2.65923634333526	1.06210630885329	0.0122888861065549	0.142378531734265	45.5413	4.39808	5.06859	2.18623
ENSG00000137040.9	RANBP6	-2.93723972725421	1.17370102556754	0.012330392128497	0.142780490950922	5.04902	5.3680765	5.158132	121.810408
ENSG00000221890.3	NPTXR	2.53751016748429	1.01409809426475	0.0123412519269781	0.142787275536647	3.41664	0.46781	0.356404	0.266929
ENSG00000196218.12	RYR1	2.61376889054983	1.04461448691008	0.0123446034291905	0.142787275536647	1.7439837	11.21072	0.5068023	1.311887
ENSG00000162897.14	FCAMR	3.71913758756813	1.48651276057543	0.0123521461805083	0.14279571527704	0	1.8492433	0.0197375	0.0237026
ENSG00000227467.3	LINC01537	3.42195813971084	1.36804656421763	0.0123722151378249	0.142893936079074	1.52981	0.140898	0	0.0715738
ENSG00000135333.13	EPHA7	3.328949329842	1.33089447688506	0.0123742780659153	0.142893936079074	0.0739358	0.32835	0.0222496	0
ENSG00000144485.10	HES6	-1.76985438714051	0.707808188668714	0.0124028021049403	0.143144454469958	2.358228	3.275329	11.44486	12.394242
ENSG00000164096.12	C4orf3	1.97931428212652	0.791714389817795	0.0124180772661526	0.143241871998509	87.3138	172.5522	25.17733	42.6508
ENSG00000186994.11	KANK3	2.49176405629842	0.996951101496317	0.0124409272051948	0.14342650896242	20.652268	2.897677	2.442957	1.5530697
ENSG00000177627.10	C12orf54	3.66763508629323	1.46782437444012	0.0124654019509603	0.14362966437063	0.16589	5.440497	0.166923	0
ENSG00000158477.6	CD1A	3.34205654052878	1.33770776370629	0.0124774421866321	0.143689401532759	0.049714	3.99352	0.0751712	0.127382
ENSG00000089012.14	SIRPG	-2.73664915360914	1.09566315228724	0.012499829447335	0.143868163309552	0.456396	4.285781	12.518365	35.751467
ENSG00000131055.4	COX4I2	2.4019473743692	0.961874556721745	0.012519513264852	0.14401563036116	16.63838	4.26326	2.51577	1.440174
ENSG00000256262.1	USP30-AS1	-2.21026690350308	0.885698567166983	0.0125777301904957	0.144605950116621	1.0233	3.06452	15.8743	10.109
ENSG00000162639.15	HENMT1	-1.65057181330022	0.661483906115384	0.0125866218107974	0.144628841300714	3.593285	4.321252	17.680883	13.25085
ENSG00000249550.6	LINC01234	-3.72879627603385	1.49451864998634	0.0125963722723897	0.144661570661378	0.037141	0.0209973	0	3.522197
ENSG00000246090.6	AP002026.1	2.41632945417412	0.968590010900672	0.0126068079405545	0.144702129039475	2.108991	2.2677333	0.153723	0.596037
ENSG00000140600.16	SH3GL3	3.65885199132468	1.46687126498595	0.0126197343989604	0.144742396509636	0.0650786	1.068068	0	0.0278077
ENSG00000145390.11	USP53	1.92184670383614	0.77052620730121	0.0126241280986504	0.144742396509636	22.241671	11.1383074	3.7318154	5.440693866
ENSG00000182379.9	NXPH4	2.61376927028358	1.04839301519437	0.0126626153249175	0.145092911560763	6.93033	1.13738	0.948476	0.301076
ENSG00000111732.10	AICDA	3.67227920762817	1.47306367848402	0.0126685446899277	0.145092911560763	0.0536707	0.620184	0	0.0153746
ENSG00000249751.3	ECSCR	2.72054214887899	1.0914898820476	0.0126846146597906	0.145197618052731	96.9361	7.66708	9.83545	4.33201
ENSG00000118985.15	ELL2	1.88062802181043	0.754905116370356	0.0127308446498197	0.145357592088528	46.402678	57.1251059	10.218906	18.976339
ENSG00000170522.9	ELOVL6	1.69271682603458	0.679395981150502	0.0127204050539151	0.145357592088528	22.933133	19.857486	9.874153	5.110196
ENSG00000184058.14	TBX1	2.46281039301167	0.988561394250994	0.0127273922695595	0.145357592088528	4.4598828	1.1374791	0.6644011	0.3275625
ENSG00000114346.13	ECT2	-2.06320231741404	0.82795832364166	0.0127056201526368	0.145357592088528	5.189667	10.2228604	67.048197	21.5799637
ENSG00000272549.1	LINC02538	3.49327594886284	1.40227807099037	0.0127332668101788	0.145357592088528	0.0432231	1.15984	0	0.0460976
ENSG00000278023.5	RDM1	-3.06310136963794	1.23007621425778	0.0127681281112638	0.145676209626553	0	0.2916025	2.735583	2.0297259
ENSG00000147862.16	NFIB	2.39121762363571	0.960575574443062	0.0127973604625337	0.145861896073693	25.501262	8.2433039	5.503012	1.1192196
ENSG00000196083.9	IL1RAP	2.29504793883916	0.921972428530776	0.0128001950822454	0.145861896073693	6.0422876	10.98771966161	3.106636	0.5898437
ENSG00000259954.1	IL21R-AS1	-2.51514565857679	1.01044796595422	0.012805281205	0.145861896073693	0.086133	0.16266	0.596137	1.45607
ENSG00000169902.14	TPST1	2.22132481401939	0.892487217364441	0.0128133599535686	0.145874639471399	32.733454	7.8196253	4.2734047	4.415016
ENSG00000274026.1	FAM27E3	-2.28367914667259	0.917948444366728	0.0128533235737187	0.14625016763386	0.473137	1.62354	10.5119	4.24593
ENSG00000170624.13	SGCD	2.61562678383058	1.05160434379006	0.0128726680618953	0.146390802989291	5.36038	0.5724413	0.5808342	0.3064316
ENSG00000165731.18	RET	3.04452808480587	1.22424460433222	0.0128875172607513	0.146480192119353	3.496753	0.1416696	0.270248	0.0700067
ENSG00000120729.9	MYOT	3.16215556274583	1.27167026610584	0.012896453726554	0.14650231634409	1.936897	1.792969	0	0.2404399848
ENSG00000189134.3	NKAPL	2.80071215602617	1.12690851483071	0.0129440226029299	0.146915146046442	2.48668	0.413545	0.0991685	0.223696
ENSG00000103184.11	SEC14L5	3.14894320733936	1.26706362898896	0.0129468140058103	0.146915146046442	0.203737	0.328799	0.0454174	0
ENSG00000205045.8	SLFN12L	-2.5197943874721	1.01435274058143	0.012986467993628	0.147126152799162	0.5479688	1.3286217	2.937839	11.877683
ENSG00000203930.11	LINC00632	3.42157885132085	1.37730061472145	0.0129819388626845	0.147126152799162	3.321497778	0.0510102	0.1686723	0.00937825
ENSG00000137561.4	TTPA	3.19667092475313	1.28675527946783	0.0129810711895737	0.147126152799162	1.10255	0.111221	0.0666328	0.0188298
ENSG00000169710.8	FASN	2.49168416527711	1.00319817673263	0.0130010429342899	0.147210071799731	501.016512	63.38523411	60.81317788	35.090891
ENSG00000119699.7	TGFB3	2.72677603066668	1.09801880408068	0.013014946469054	0.147210071799731	76.167758	5.0333051	5.952532	4.6364669
ENSG00000283029.1	AL139099.4	3.88645855985191	1.56498106785754	0.0130138467956286	0.147210071799731	48.6598	0.00166865	0.00062808	0.00302859
ENSG00000140955.10	ADAD2	3.26603705414762	1.31558540090332	0.0130437266591449	0.147456023219535	0.2508168	4.395689	0.0402166	0.2402249
ENSG00000123243.14	ITIH5	2.91560798495751	1.17503046137779	0.0130902616153174	0.147822625644093	184.716949000429	6.3056115	12.2643032	7.8070586
ENSG00000149090.11	PAMR1	2.66511893889953	1.07404235760951	0.0130870763894474	0.147822625644093	23.064176	2.390843	2.780396	0.91462386
ENSG00000100351.16	GRAP2	-2.03037541349718	0.818579886967278	0.0131248622513105	0.148133542232211	1.848925	2.979555	8.11497	16.6454737
ENSG00000203585.4	LINC02408	-3.62134812052035	1.46110489372843	0.0131936201885397	0.148829432471261	0	0.0253273	0.0910877	1.171332
ENSG00000243244.6	STON1	2.4237422961842	0.97820616851723	0.0132216792971403	0.149065721564693	16.068549	2.463452	1.54055842	1.714862
ENSG00000164741.14	DLC1	2.92917440664984	1.182460159855	0.0132422666744636	0.149217563026926	59.7604871	2.078767	4.4902501	1.9936532
ENSG00000116774.11	OLFML3	2.49162435251287	1.00593845557379	0.0132523346903777	0.149250769895554	105.250251	12.857946	10.5323	9.105379
ENSG00000147588.6	PMP2	3.49908239928439	1.41367628383181	0.013317454393262	0.14974277179634	0.747772	0.0929581	0	0.037796
ENSG00000153956.15	CACNA2D1	2.49887144310588	1.0094496205508	0.0133057547397763	0.14974277179634	6.32493	0.891505	0.842036	0.388495
ENSG00000139514.12	SLC7A1	2.18875648934085	0.884245631663762	0.0133131349849456	0.14974277179634	13.098259	54.96303	8.05974	7.159348
ENSG00000198838.13	RYR3	1.95477410341164	0.789943273144556	0.0133394701400003	0.149909895262341	2.344147128	2.258899	0.4792212	0.753371300174487
ENSG00000158055.15	GRHL3	3.75339583673237	1.51702063525518	0.0133539013675066	0.149991649925816	0	78.277219	0.9791245	0.2532887
ENSG00000227115.7	LINC01630	-3.87231298767036	1.56523633207434	0.0133629218199772	0.150012575482004	0	0	0	2.580156
ENSG00000185112.5	FAM43A	2.00121180436505	0.809024705236009	0.0133755526602508	0.150073987262418	26.6602	9.88057	6.31216	3.51012
ENSG00000124253.10	PCK1	3.39958688962768	1.37458906026131	0.0133921931199289	0.150180297271584	17.257871	0.5604455	0.0194477	0.763955
ENSG00000164112.13	TMEM155	-3.12233547731071	1.26269038853411	0.013407260543019	0.150268862952479	0.128613	0.27076686	0.233424	6.348721
ENSG00000120833.13	SOCS2	2.51973585223328	1.01933198382867	0.0134378989790948	0.150371022265268	60.630155	7.612691	4.419473	6.327181
ENSG00000174844.14	DNAH12	-2.90090099939666	1.17342703262815	0.0134298873489451	0.150371022265268	0.068851	0.0858602	0.4319158	1.2318833
ENSG00000181873.12	IBA57	1.91979253524708	0.77658064660472	0.0134318299337001	0.150371022265268	3.7311247	2.9272	0.628088	1.1809967
ENSG00000119900.8	OGFRL1	1.94762863311232	0.788030465563089	0.0134542137475013	0.150460950013613	8.062467	19.721021	5.063736	2.794733
ENSG00000216588.8	IGSF23	-3.5495969998629	1.43629712132156	0.0134602930137661	0.150460950013613	0	0.146903	0.3553983	4.791743
ENSG00000170006.11	TMEM154	3.05169991355032	1.23516147697346	0.0134853026533782	0.150660159015007	0.616578	28.110676	0.84818	1.549472
ENSG00000070031.3	SCT	-3.37108832012115	1.36488957132741	0.013516534032597	0.150928629083219	0.269515	0.236974	0.857816	10.5342
ENSG00000173269.13	MMRN2	2.56224274647411	1.03780920894553	0.0135530695643601	0.151256009051876	43.9249649	4.539307	4.772554	2.839306
ENSG00000014914.20	MTMR11	-2.0358458379755	0.824986942162375	0.0135972464009304	0.151587599636756	5.3596473	14.3612969	74.82392	34.619389
ENSG00000007372.22	PAX6	-3.19633932643254	1.29519288662642	0.0135927980549523	0.151587599636756	0.161086	0.1276644	6.0161054438618	0.14693540192805
ENSG00000243566.6	UPK3B	2.79121252696715	1.13142844067585	0.0136257566881007	0.151663427735476	1.4853478	17.279006	0.698603987056	1.4693318
ENSG00000181585.4	TMIE	3.24533215581809	1.31542232580474	0.0136196772245687	0.151663427735476	0.393997	0.774651	0	0.0561187
ENSG00000109881.16	CCDC34	-2.01179004090405	0.815411068361867	0.0136170612230658	0.151663427735476	3.616228	8.689143	25.12683	37.96348
ENSG00000213316.9	LTC4S	2.17052056526186	0.8799402421985	0.0136376682284042	0.151715439702295	17.627009	6.83325	3.82352	1.880436
ENSG00000205177.6	C11orf91	2.65860363092311	1.07801701900196	0.0136555750305624	0.151834056798704	6.416965	1.511596	0.577949	0.534521
ENSG00000204936.9	CD177	2.52708669672639	1.02481661240413	0.0136672680891805	0.15188349516497	1.00244	6.250366	0.845636	0.358359
ENSG00000277224.2	HIST1H2BF	-3.03802919709048	1.23225333369326	0.0136850504858617	0.151893936999877	0	0.358996	3.30301	2.7452
ENSG00000130827.6	PLXNA3	-1.64945909650195	0.669099370422822	0.0136939461172437	0.151893936999877	19.95715	15.92352476	91.355435	51.04253
ENSG00000218357.3	LINC01644	3.82589834770823	1.55202058921552	0.0136971964754887	0.151893936999877	0.059849	1.67407	0	0
ENSG00000111145.7	ELK3	1.89325575600996	0.767908446157784	0.0136833374857156	0.151893936999877	36.6345132	14.844299	8.5957455	6.366823
ENSG00000131203.12	IDO1	-2.71407821519155	1.10112381241856	0.0137079935782629	0.151933282605401	2.810501	38.224113	317.46488	129.548108
ENSG00000117519.15	CNN3	1.85031792516544	0.751048552745494	0.0137531787146837	0.152353526787028	203.567501	87.972556	50.434782	37.40402
ENSG00000270550.1	IGHV3-30	-3.32060937745833	1.34845352416315	0.0137960025757535	0.152747183299112	1.5987	49.1734	40.0847	1098.81
ENSG00000115041.12	KCNIP3	2.40752717477108	0.977897083580492	0.0138186509831551	0.152917162595537	2.168317	1.632269	0.5699339	0.1400645
ENSG00000104368.17	PLAT	2.28523802518272	0.928479350180251	0.0138446277094013	0.153123774227621	99.854076	27.647806	20.970514	6.2228036
ENSG00000117114.19	ADGRL2	1.91317844727366	0.777376655560499	0.0138523295696045	0.153128151608302	16.56270251188	15.965522	7.3058050118694	2.36443400995516
ENSG00000106034.17	CPED1	2.36264517754402	0.960252089265862	0.0138765755028245	0.153315311525408	17.077035	2.870894	1.7857732	1.93247
ENSG00000261889.1	AC108134.2	3.02582791593312	1.22990695296334	0.0138856202492748	0.153334412436538	8.36335	0.509218	0.262473	0.439303
ENSG00000158352.15	SHROOM4	2.31574146861044	0.941638878521747	0.0139221014679561	0.153656305775088	5.1099785	1.0352531	0.8346082	0.4114641
ENSG00000153923.10	CLCA3P	3.84814501107165	1.56544109636996	0.0139640923665116	0.154038637847219	0	1.3970303	0	0
ENSG00000266903.1	AC243964.2	-2.63777970472232	1.07331395808283	0.013986765923838	0.154207589162399	0.657283	0.1355284	4.310272	3.124498
ENSG00000251257.2	AC010457.1	3.80807463635332	1.54974880868315	0.0140016693274076	0.15429073997536	6.850441	0.435695	0	0
ENSG00000166033.12	HTRA1	2.76679017670382	1.12626487964791	0.0140256030914613	0.154415538582111	290.1699	23.42364	33.25237	7.51231
ENSG00000187151.7	ANGPTL5	3.81614101401534	1.55354802517113	0.0140335434855264	0.154415538582111	0.652402	0.0182797	0	0
ENSG00000281769.1	LINC01230	3.84718305734709	1.56621057931024	0.0140350971419877	0.154415538582111	1.82541	0	0	0
ENSG00000104921.14	FCER2	2.99426835265567	1.21955751176219	0.0140802772508337	0.154831338352688	6.4593524603	3.139516035126	0.028429	0.76943
ENSG00000111181.12	SLC6A12	-2.07213712191965	0.844137537179988	0.0140987008570596	0.154871420997439	0.4893697	0.3856307128553	1.848584	2.951099
ENSG00000146755.10	TRIM50	2.88138722680443	1.17379559612698	0.0140978424579982	0.154871420997439	0.40933276	0.7500869916	0.0340064	0.090483401
ENSG00000105929.16	ATP6V0A4	3.61714236088222	1.47382718544695	0.0141178262468129	0.155000272554715	0.0340388	0.7404948	0	0.0197915
ENSG00000196337.11	CGB7	3.30602810460537	1.34812716543068	0.0141941623121066	0.155756779004943	0.0653048	1.662872	0.0665783	0.0379211
ENSG00000125531.6	FNDC11	-2.59936281082109	1.06009284722633	0.0142059019994092	0.155766245375575	0.2177268	0.100686	2.56324	0.5289550026
ENSG00000140368.12	PSTPIP1	-2.36552984010191	0.964768951756703	0.0142098888858294	0.155766245375575	10.31566151	7.4437497	20.2662780158556	100.017559
ENSG00000165238.16	WNK2	-2.16336672136333	0.882507313108982	0.0142306965165154	0.155912790533009	1.1984426	3.381026	8.8899269	17.6825724
ENSG00000196126.11	HLA-DRB1	-2.20342382419739	0.898963256563893	0.0142431390830332	0.155967582048743	124.99	139.63	1499.44	267.891
ENSG00000114698.14	PLSCR4	2.28193993364093	0.931141561698414	0.0142582426854826	0.156051440441269	30.96355118842	6.254989	5.064391429	2.688429
ENSG00000117322.17	CR2	3.43993594063903	1.40424069947758	0.0142984472226191	0.156165271151055	0.0256723	15.0638335	0.17183	0.44238060239
ENSG00000242574.8	HLA-DMB	-1.57945467245464	0.644747566966689	0.0142965086614959	0.156165271151055	46.203164	60.19787	224.40389	169.84859
ENSG00000143320.8	CRABP2	3.12273805243756	1.27453007157593	0.014281283397764	0.156165271151055	30.696815	1292.93914	15.597253311	79.179537
ENSG00000258920.1	FOXN3-AS1	1.99517963054055	0.814362519225226	0.0142860376099175	0.156165271151055	5.35491	3.581	0.979575	1.32919
ENSG00000165185.14	KIAA1958	-1.73047838839379	0.706585486547225	0.0143225007463199	0.156265118762164	0.3622641	0.598706	2.211459	1.79524
ENSG00000108602.17	ALDH3A1	3.55260230567774	1.45054311850797	0.0143192532891197	0.156265118762164	0.518944	592.373948	19.152017	1.3033646
ENSG00000169439.11	SDC2	2.7367250895881	1.11774044037149	0.014347465459337	0.156456050240501	113.433414	7.253119	11.25494	4.573231468
ENSG00000138684.8	IL21	-3.13584015834825	1.28091334933794	0.0143600530334439	0.156511883269865	0	0.1075317	0.466904	1.384016
ENSG00000128602.9	SMO	2.16087611817633	0.883025662300134	0.0144000007911087	0.156865705083601	4.90899	11.411221	1.0490229	2.4995517
ENSG00000184602.5	SNN	2.11514766951868	0.864532226732139	0.0144218595922956	0.157022210490869	50.2934	15.2974	6.05132	9.07145
ENSG00000070019.4	GUCY2C	-3.22730434166825	1.31936779299607	0.014441130969732	0.157150396674254	0.1386403	0.206459	0.0650637	6.513247
ENSG00000165028.11	NIPSNAP3B	2.76874620436967	1.13270090228818	0.0145103198940367	0.157535663474888	18.228148	1.168478	1.015404	1.297997
ENSG00000269711.1	AC008763.3	3.82949721713565	1.56671724616563	0.0145141164258795	0.157535663474888	8.51447	0	0	0
ENSG00000019144.18	PHLDB1	2.64894913079767	1.08347569870749	0.01449073662413	0.157535663474888	229.688938	16.5328463	19.63472444	14.9307786
ENSG00000140044.12	JDP2	1.90348220237347	0.778735082039328	0.0145123171439404	0.157535663474888	56.63374	23.988722	15.120592	8.405613
ENSG00000182674.5	KCNB2	3.7891203111036	1.55002011261048	0.014502813947143	0.157535663474888	0.32094	0.0234184	0	0
ENSG00000221818.8	EBF2	3.45863032134472	1.41527784502516	0.0145342116167253	0.157672122813119	15.5283269	0.0160096	0.4503731	0.195506
ENSG00000166183.15	ASPG	3.60233317108046	1.47425111544471	0.0145455539987164	0.157713536605845	1.1032604	69.2254571	2.033407	0
ENSG00000185737.12	NRG3	3.5243291717449	1.44277062569981	0.014575796053886	0.157878092761445	0.54998057	0.0544289	0.024258196	0
ENSG00000138308.5	PLA2G12B	-3.82649452637467	1.56646005328627	0.0145752056764651	0.157878092761445	0	0	0	6.71483
ENSG00000165424.6	ZCCHC24	2.59130665202699	1.06139431255811	0.0146297304781015	0.158298668606365	47.9135	4.09821	4.55635	3.24262
ENSG00000105967.15	TFEC	-1.93445252862757	0.792329948067595	0.0146274640233559	0.158298668606365	2.2459524	1.3398148867	6.022663	10.996626
ENSG00000124243.17	BCAS4	-2.24424780447274	0.919478899690304	0.0146554873484279	0.15849554145289	0.610661	2.852423	14.31963	8.757717
ENSG00000175591.11	P2RY2	2.76252713561349	1.13201612893465	0.014672622763542	0.158572513742813	1.565032	20.70435	2.270359	0.6332401
ENSG00000149021.6	SCGB1A1	3.82201234373098	1.5662480654166	0.0146777363739232	0.158572513742813	0	18.1261	0	0
ENSG00000237438.7	CECR7	2.26443150638693	0.928028429436778	0.0146854159323111	0.158573741641066	1.1641532	3.502825	0.3600379	0.581206
ENSG00000087258.14	GNAO1	1.80571671858459	0.740621740124627	0.014764310957569	0.158951696890929	1.6728644	1.799552	0.46353475	0.58779590086426
ENSG00000141293.15	SKAP1	-2.26297736797591	0.9281839880175	0.0147659217446748	0.158951696890929	1.8875509	4.215283	9.60421	28.787096
ENSG00000212939.2	Z97192.1	-3.45708639085913	1.41771894104033	0.0147489702467685	0.158951696890929	0	0.010719	0.333743	0.0654188
ENSG00000077935.16	SMC1B	-3.15419490069761	1.29346169847621	0.0147455654109496	0.158951696890929	0.0353946	0.049478	1.700026	0.040268
ENSG00000086300.15	SNX10	-2.19993574406972	0.902030051901124	0.0147331900295917	0.158951696890929	6.970335	2.818888196	15.818553	42.0101915
ENSG00000182718.16	ANXA2	1.57713244905108	0.646837845272138	0.0147598211588825	0.158951696890929	1453.484299	1650.374692	730.968829	448.972384
ENSG00000136231.13	IGF2BP3	-2.84766306703948	1.16838279829638	0.0147986697792567	0.159140749052561	0.0681054	1.445218	13.017703	5.8064166
ENSG00000108786.10	HSD17B1	1.6894964539994	0.693171428730454	0.014795642054289	0.159140749052561	3.274618	4.447313	1.602275	1.07043
ENSG00000160808.9	MYL3	3.30451887929005	1.35626907158078	0.0148310980710765	0.159325978714348	6.169227	0.0979562	0.198065	0.1049745
ENSG00000275004.3	ZNF280B	-3.00829277008118	1.23468331557532	0.0148306054675536	0.159325978714348	0.0342137	0.0931967	0.0858276	1.740072
ENSG00000187513.8	GJA4	2.90053265312105	1.19076702741189	0.0148567477150015	0.159519761966556	73.65762	2.211387	4.48276	3.39549
ENSG00000172889.15	EGFL7	2.51176418459232	1.0313544784077	0.0148751965728169	0.159636070132959	179.737446	18.976023	19.651387	12.818771
ENSG00000198795.10	ZNF521	2.4331424017192	0.999354031800334	0.0149035168280777	0.159858141862682	6.590333	1.592726	1.234778	0.284583
ENSG00000231367.5	AC011247.1	3.27162649653172	1.34407330040705	0.0149283276200286	0.159960541200501	1.6696534	0.3391835	0.0498884	0.0921228
ENSG00000211677.2	IGLC2	-3.26381301058529	1.34076225961327	0.0149207630864597	0.159960541200501	92.6566	1865.56	1082	39819.4
ENSG00000261716.2	HIST2H2BC	-1.80429561524175	0.74150525579891	0.0149624070883885	0.160243786492353	0.697012	1.377151	5.60329	3.69004
ENSG00000203804.4	ADAMTSL4-AS1	2.21917702953523	0.913689258955473	0.0151484951015674	0.162071112217331	4.43955	1.9919886	0.566915	0.798067
ENSG00000211947.2	IGHV3-21	-2.99590765839898	1.23342642005829	0.0151434143522426	0.162071112217331	10.7773	19.8446	10.7261	408.982
ENSG00000180626.9	ZNF594	-1.88491168042467	0.776191674666251	0.0151651855048243	0.162166899487557	0.7056242	1.16329	6.46437	2.746909
ENSG00000260740.2	AC026471.3	-3.06986365919801	1.26484175609991	0.0152211800652439	0.162599751777496	0	0.317466	3.24574	3.14203
ENSG00000196196.2	HRCT1	2.47917199962096	1.02140935338249	0.0152155688379285	0.162599751777496	13.6964	2.06865	1.5928	1.07129
ENSG00000178934.4	LGALS7B	3.71301267104176	1.53009682173048	0.0152388609620393	0.162705698880989	0	487.09348	6.5012	0.423134
ENSG00000204928.2	GRXCR2	-3.58834724306266	1.47995021962541	0.0153235525319015	0.163471721601873	0.052299	0.0625274	6.14411	0
ENSG00000134548.10	SPX	3.12596878086886	1.28928383613248	0.0153262051122516	0.163471721601873	0.857316	0.1326393	0.03206766	0.03601809
ENSG00000171246.5	NPTX1	2.41762507292254	0.99755507016494	0.015369616859095	0.163851373219619	0.6848877	0.21714	0.115546	0.0491049
ENSG00000267369.1	AC015911.7	-2.39093656837231	0.986620766316596	0.0153777106392957	0.163854314839349	1.42337	2.51901	5.16871	22.5785
ENSG00000283071.1	LBHD2	3.79580696115023	1.56768338420187	0.0154657819988944	0.164709006562413	8.69991	0	0	0
ENSG00000090512.11	FETUB	3.79365972336485	1.56707433753144	0.0154840528089854	0.164819838914944	0	4.085292	0	0
ENSG00000215834.10	FMO9P	3.70980866161222	1.5331166494177	0.0155297976887569	0.165195447729744	0	2.93335	0	0.0345553
ENSG00000278910.4	BANCR	-3.46683814170442	1.43278013107312	0.0155351031764552	0.165195447729744	0	0.144958	5.46837	0.1847391
ENSG00000249923.1	AC007663.2	-3.43201523470812	1.41887888514159	0.0155708644264982	0.16540788013937	0.0464874	0.1759	8.47809	0.0200934
ENSG00000124215.16	CDH26	1.89235736526267	0.782294646561807	0.0155639722575402	0.16540788013937	1.85101566	1.937162	0.6957589	0.4354164
ENSG00000261068.2	AL512274.1	2.88288863466846	1.19215527985072	0.0155968274721594	0.165599750247714	1.16068	22.7851	2.21062	0.462654
ENSG00000213934.8	HBG1	3.79068521805367	1.56783024195298	0.0156150600163942	0.165706430731549	7.93839	0	0	0
ENSG00000205403.13	CFI	1.90414033160149	0.787611757942491	0.0156226874910798	0.165706430731549	44.0423038	16.4525109	9.384866	7.8456569
ENSG00000136997.17	MYC	1.9492213832892	0.806382676797662	0.0156386528738631	0.165791869288465	331.790441	123.648197	53.4089678	68.74151
ENSG00000164651.16	SP8	-3.75482347029024	1.55427296084306	0.0157003816506234	0.166278069234672	0	0	0.0143898	0.5069236
ENSG00000006747.14	SCIN	3.11409582794055	1.28898189706407	0.0156948846102841	0.166278069234672	1.0187816	40.9939336	3.138093	0.3109803
ENSG00000123407.3	HOXC12	-3.78483931644657	1.56758856788353	0.0157596729030484	0.166426701837532	0	0	0	1.83696
ENSG00000178372.7	CALML5	3.57552729841896	1.48059976387011	0.015738744370114	0.166426701837532	0	10.8745	0.2178	0.0609319
ENSG00000202198.1	RF00100	3.78548128957241	1.56797942439047	0.0157679992125734	0.166426701837532	32.105	0	0	0
ENSG00000127311.9	HELB	-1.85098635705034	0.766628012119142	0.015758909379504	0.166426701837532	0.437687	0.718612	2.0037233	3.165718
ENSG00000176171.11	BNIP3	1.87331334736377	0.775664901075933	0.0157306092662188	0.166426701837532	25.212957	15.816139	4.130538	7.447362
ENSG00000068078.18	FGFR3	3.23132319210649	1.3384679269013	0.0157699999928116	0.166426701837532	1.25832671017052	134.91304	1.18733558	6.662478
ENSG00000149177.12	PTPRJ	-1.67865982904667	0.695261024475984	0.0157598040158494	0.166426701837532	3.5714305	3.619511	11.525379	16.451252
ENSG00000109265.14	KIAA1211	-2.40814746830338	0.997606093886853	0.0157816593730174	0.166465927931088	0.1008213256	0.397292558	3.189154	0.84647460161412
ENSG00000156284.5	CLDN8	3.78247200380981	1.56741216931351	0.0158133347236383	0.166716138064756	0	2.16471	0	0
ENSG00000118402.5	ELOVL4	2.68437472895148	1.11256304576855	0.015831182349222	0.166820387560253	0.780193	6.11862	0.200335	0.665951
ENSG00000228630.5	HOTAIR	-3.78200937404017	1.56766559529712	0.0158430903880573	0.166861975599645	0	0	0	3.631905
ENSG00000198246.8	SLC29A3	-1.74940492170142	0.725295180635123	0.015865704739735	0.167016225836316	3.9461781	2.1044355001897	12.9292402901393	12.48179159
ENSG00000184937.13	WT1	3.68147694143713	1.52645395830648	0.0158746914135194	0.167026936413631	32.1543	0	0.0427562	0.380664
ENSG00000232821.1	AC003986.2	3.70455513364109	1.53633468310978	0.0158960138190044	0.167167362585305	2.46214	0	0.0314732	0
ENSG00000204851.6	PNMA8B	2.38146684633936	0.987821910125406	0.0159164353121438	0.167298178388777	1.73791	0.433951	0.128552	0.253634
ENSG00000132874.14	SLC14A2	3.43174631604739	1.42363460129199	0.0159283673711769	0.167339675053883	3.126257	0.0174162	0.0104266	0.106329
ENSG00000173210.19	ABLIM3	2.34448425409788	0.972956601600017	0.0159678585630117	0.167628204189172	37.8380986	14.732963	9.190101	1.503695
ENSG00000283341.1	AC068205.2	-2.37073832074507	0.983889014012729	0.0159718270798119	0.167628204189172	0.0974803	0.512417	2.031916	2.49764
ENSG00000170956.16	CEACAM3	2.8191332573286	1.17047728368512	0.0160167746888548	0.168015806158012	2.778391	1.3172302	0.4779414	0.0360385
ENSG00000229644.6	NAMPTP1	2.06190370197083	0.856176945449149	0.0160284016945514	0.168053662389246	22.7222	11.0631	6.84106	1.96061
[truncated: 29,265 more rows]
