# Supplementary material for: High Expression of Interleukin-2 Receptor Subunit Gamma Reveals Poor Prognosis in Human Gastric Cancer
Source: J Oncol. 2021 Jan 21;2021:6670834. doi: 10.1155/2021/6670834 (PMC7843183; doi:10.1155/2021/6670834)
Supplement: Supplementary Materials — Table S1: characteristics of the patients diagnosed with gastric cancer. Table S2: information of raw sequencing reads and mapping. Figure S1: sequencing samples comparison based on the expression levels of transcripts per million (TPM). N, normal gastric tissues. T, tumor. F, female. M, male. Figure S2: cytokine-cytokine receptor interaction (CCRI) pathway map based on the DEGs between GC and adjacent non-GC gastric tissues. Figure S3: the regulation network of TF-DEG and miRNA-DEG.A. Figure S4: molecular docking results of resatorvid and IL2RG. A. The files named deg_N_T_tpm.txt, deg_NF_TF_tpm.txt, and deg_NM_TM_tpm.txt contain the DEGs and related statistical information. [file 6670834.f1.zip › 6670834.f1/deg_NM_TM_tpm.txt]

GeneID	symbol	log2FC	lfcSE	pvalue	padj	N-M-700963	N-M-697023	N-M-699732	N-M-693915	T-M-695799	T-M-693915	T-M-698012	T-M-700963	T-M-703596
ENSG00000123388.4	HOXC11	-5.66285364427914	0.680292939827251	8.4943196310748e-17	1.99285232864646e-12	0	0	0	0.0213226	1.902934	0.5116229	3.238129	2.824788	1.570893
ENSG00000037965.5	HOXC8	-4.59737272966674	0.661531559082506	3.66350830719293e-12	4.27534655065774e-08	0.0297547	0.0287564	0	0	1.00953	0.469135	0.713787	1.70593	0.918727
ENSG00000228630.5	HOTAIR	-5.02051925958936	0.728361870996812	5.46696204423222e-12	4.27534655065774e-08	0	0	0	0	0.627103	0.360834	1.54099	0.4619406	1.39722
ENSG00000159184.7	HOXB13	-5.01970603883631	0.748095518736427	1.94650966424217e-11	1.14167658081964e-07	0	0	0	0.0120034	1.95433	0.166678	2.0649	0.333955	3.08684
ENSG00000180044.5	C3orf80	-2.7022879467096	0.415461037144423	7.80500853934471e-11	3.19641910956571e-07	0.312704	0.3204377	0.181985	0.17233743	0.816868	1.59222	2.50752	3.30864	1.66734
ENSG00000170373.8	CST1	-5.02492534385207	0.773380571048237	8.17463648497261e-11	3.19641910956571e-07	0.110401	0.173645	0.0910533	0.0699754	3.75021	2.56823	91.511557	423.233	140.316
ENSG00000253293.4	HOXA10	-4.41092493787788	0.684726565093172	1.18004188224126e-10	3.95499465703747e-07	0.2881973	0.0929721	0	0.1056671	9.791999	1.053668	14.650889	5.040014	4.452238
ENSG00000005073.5	HOXA11	-4.81002927544696	0.760079023470156	2.47832092542705e-10	7.26798590393052e-07	0	0	0	0	1.616671	0.425429	2.086583	0.14545	2.048699
ENSG00000069812.11	HES2	-4.0093974552815	0.639350509200475	3.58627028522893e-10	9.34860968463955e-07	0.0871162	0.023904	0.0626614	0.00965427	1.1697431	0.2846535	3.571942	0.9469557	1.3746641
ENSG00000106031.8	HOXA13	-4.77396257379119	0.765765985374147	4.54000730295572e-10	1.06513111334644e-06	0	0	0	0.008143595	2.882188053	0.08222862	1.3505161	0.29903288	1.2248728
ENSG00000122012.13	SV2C	3.65728188672132	0.591085907074622	6.11666271658697e-10	1.30457294539861e-06	0.677216	0.295674	0.704614	0.126683	0.010981	0.0365399	0.00444467	0.016107	0.0463217
ENSG00000139540.11	SLC39A5	-4.43571341679255	0.721916588671834	8.02879633273019e-10	1.56969658968486e-06	0.1077982	0.1449238	0.2312797	0.6151305	28.851876	2.7353187145	38.360057	51.64079	2.051357
ENSG00000105464.3	GRIN2D	-4.27264969708651	0.707941573854876	1.58653871461244e-09	2.86321421411712e-06	0.154069	0.0496081	0.0520167	0.176324	16.4128	0.343936	3.31784	7.53572	2.97483
ENSG00000180818.4	HOXC10	-4.59737362723391	0.779898337230952	3.75051266683363e-09	6.28505554832741e-06	0.0289492	0	0	0	10.30422	0.2886706	0.6575773	11.762469	9.00656
ENSG00000119547.5	ONECUT2	-4.28052923455183	0.734095515759773	5.50879612153119e-09	8.61612438714955e-06	0.0315671	0.00914605	0.0287704	0.103457	6.71587	0.217578	1.2189	7.55502	1.34979
ENSG00000213578.5	CPLX3	4.33232908356012	0.762952475533582	1.35981577001096e-08	1.91686652020794e-05	18.3204	3.09214	22.943	0.0833422	0.246529	0.0263118	0.124304	0.09278	0.0506534
ENSG00000233670.6	PIRT	3.7168610288499	0.654983208008423	1.38897450422126e-08	1.91686652020794e-05	2.93746	0.780041	3.06012	0.445382	0.0329563	0.233109	0.0400406	0.0120885	0.0505611
ENSG00000137251.15	TINAG	-4.15072446170569	0.741324020774447	2.15505817211048e-08	2.808878876438e-05	0	0	0	0.0955355	2.108639	0.7123713	5.67077	2.158992	0.491349
ENSG00000164283.12	ESM1	-4.01135562421178	0.734246411866142	4.67553207348382e-08	5.77329778821074e-05	0.102095	0.3479819	0.077586	0.139488104	25.171896	0.414279	3.862823	13.034019	3.199519
ENSG00000249550.6	LINC01234	-4.15001305557738	0.763816893882947	5.53347959217656e-08	6.49104823560271e-05	0.05743237	0	0.0269722	0.0207693	4.921041	0.0786845	1.124337	6.017096	0.5796724
ENSG00000275713.2	HIST1H2BH	-3.71765257076026	0.688356876317233	6.63579271827124e-08	7.41344442682674e-05	0.0540386	0.0783328	0.0821356	0.337311	6.3532	0.452596	5.10678	8.00311	2.18374
ENSG00000166415.14	WDR72	-4.23941709764538	0.789223817214638	7.80287626018488e-08	7.95927304087815e-05	0.0249787	0	0.0253013	0.00974543	3.93267706	0.15991438	9.3893767	13.2438335	0.0566982
ENSG00000163347.5	CLDN1	-3.01374748267826	0.560976683987129	7.77290668236424e-08	7.95927304087815e-05	3.50772	1.686523	0.822376	1.18326	24.31255	4.1039	41.36833	15.6156	16.505123
ENSG00000240990.10	HOXA11-AS	-4.20556850631302	0.785920726795281	8.74039171296729e-08	8.54409708241357e-05	0	0	0	0	3.0639265	0.15941679	5.614944	0.5096181	2.5688146
ENSG00000253187.2	HOXA10-AS	-4.12920945732523	0.781026250908457	1.24405061291844e-07	0.000116746685718719	0	0	0	0	3.719524	0.178643	2.414963	0.907935	1.25511
ENSG00000134443.9	GRP	3.90878953576402	0.751282545252396	1.96284599726627e-07	0.000177116653622554	24.297416	13.48207	30.085803	0.181444	0	0.483096	0.6159868	0.211433	0.444233
ENSG00000240602.7	AADACP1	-3.69317480759166	0.716974053717574	2.59021307836219e-07	0.000225070329746131	0.1932458	0.0895653	0.093913	0.2063262	4.241485	0.709024	4.58966	15.682673	0.4413003
ENSG00000170091.10	NSG2	3.20713710616092	0.629429056968855	3.48168315793383e-07	0.000291727744886734	6.1864744	1.649606	6.05955	0.365667	0.158481	0.561974	0.1368707	0.116292	0.243173
ENSG00000180806.4	HOXC9	-3.69875231836421	0.750113240827535	8.18410494809893e-07	0.000662094090301203	0.26365101925	0	0	0	3.31651	0.52116096235	2.290201	5.96168	0.763032
ENSG00000180178.10	FAR2P1	-3.77350679362963	0.77279497112641	1.04518894066155e-06	0.00073348897830311	0.0284333	0.0135126	0.0429705	0.0109533	0.3912574	0.0275544	0.4876414	1.3491493	5.914699
ENSG00000140506.16	LMAN1L	3.81355073278746	0.780373408530001	1.02473469511124e-06	0.00073348897830311	20.438249	2.149899	31.543654	0.1050027	0.325468	0.1741661	0.1514063	0	0.23819
ENSG00000109132.6	PHOX2B	3.62432990605713	0.74118270925759	1.008729895616e-06	0.00073348897830311	1.26086	0.274518	1.25933	0.1151615	0	0.069974	0	0	0.0322497
ENSG00000125207.7	PIWIL1	-3.7859435403676	0.775870815017686	1.06298219437815e-06	0.00073348897830311	0.013594	0.0131324	0	0.0321557	1.7440812	0.026779	2.33283	0.1639748	2.7011828
ENSG00000123500.9	COL10A1	-3.89005799025378	0.795345929079493	1.00311473057641e-06	0.00073348897830311	0.309123	0.0314365	0.0494441	0.0634749	0.0744929	0.897461	86.085543	22.7248	15.98121
ENSG00000259780.3	AC009065.1	-3.75310739703538	0.770730905639204	1.11856560104673e-06	0.000749790501890211	0	0	0	0	0.599518	0.145023	0.565148	0.530878	0.356281
ENSG00000156510.12	HKDC1	-3.56045937099168	0.7325862970423	1.1731295719674e-06	0.000764522024664645	0.172853	0.0139156	0.3067935	0.846079	14.778157	2.341971	31.00829	14.504	2.706095
ENSG00000141527.17	CARD14	-3.03819218300918	0.627660296253178	1.29510240567013e-06	0.000821199933498022	0.21176827456095	0.1178033	0.1661553	0.5253555	7.02175501	0.6892705	3.1872704	3.98431425	2.3512522
ENSG00000155511.17	GRIA1	3.41807487334293	0.707387313770038	1.35188058661699e-06	0.00083464395901635	8.80989700220096	1.2492439	1.388631	0.2029508	0.00787967	0.164175	0.1877063	0.15898220524	0.108793
ENSG00000272763.1	AC103702.2	-3.51415224690743	0.728221666867353	1.39538388691113e-06	0.000839412855662103	0.548807	0	0.095231	0.2142551	4.13168	0.324137	11.000636	3.18373	10.305773
ENSG00000133874.1	RNF122	2.38101501357099	0.494484464795803	1.47092125630156e-06	0.000849317689523887	55.468	57.1309	57.6756	7.35808	4.06519	7.57105	7.05441	12.0134	6.45736
ENSG00000243766.8	HOTTIP	-3.78297394084681	0.78593460264065	1.48425153533436e-06	0.000849317689523887	0	0	0	0	0.774001	0.1011032	0.7056246	0.1168759	0.458138
ENSG00000144218.18	AFF3	2.15267290095093	0.449325515194847	1.66036173989173e-06	0.000910180572952682	5.2722693	4.3202017	4.610027	2.418102	0.6633221	1.2040914	0.3126309	0.5882509	1.439106
ENSG00000166573.5	GALR1	3.2722041881341	0.683139126718618	1.66820530399238e-06	0.000910180572952682	0.393117	0.221893	0.186134	0.0677258	0	0.0307707	0.00978449	0	0.0231751
ENSG00000006047.12	YBX2	-2.74143695471061	0.573320214474693	1.73831493083352e-06	0.000926877422551936	1.345746	1.67833784374	2.262567	1.334567	24.3194	2.8223819	22.210671	6.393758	21.01817
ENSG00000103175.10	WFDC1	2.34439861320083	0.493309936078239	2.01031370669962e-06	0.00104808821939733	168.640335	140.65642	78.342057	27.220918	12.584595	17.101181	9.070239	31.510888	16.979516
ENSG00000139200.13	PIANP	1.88136120091868	0.397729617704968	2.24241639091244e-06	0.00114368110754775	2.72892	1.730907	3.66593	1.486058	0.29886	0.6042511	0.698257	0.4690017	1.0748034
ENSG00000228168.1	HNRNPA1P21	-3.58880701114254	0.760476177050711	2.36823173467094e-06	0.00118215073887478	0.198085	0	0	0.051508	0.468777	0.521069	2.79328	9.64464	1.25981
ENSG00000165215.6	CLDN3	-3.74036629883433	0.79488116773487	2.53161799699981e-06	0.00123738103807526	0.0935833	0	0	0.766638	42.7505	12.2713	82.4239	2.72454	43.5648
ENSG00000135406.13	PRPH	3.22609740647064	0.686439199150576	2.60471287234076e-06	0.00124712589179565	39.300876	10.940388	40.7507316	2.021915	0.4247246	3.166779	0.2401151	0.6679171	2.0896681
ENSG00000117598.11	PLPPR5	3.72236400560348	0.794367037051068	2.78664656669384e-06	0.00125725990579239	0.390902	0.2919933	0.4406394	0.00995571	0	0.0125666	0	0	0
ENSG00000177511.5	ST8SIA3	3.42895931326518	0.731259890029713	2.74393571406007e-06	0.00125725990579239	0.563241	0.0250354	0.1912858	0.146334	0.00340925	0.0127624	0	0.022503	0.00392218
ENSG00000078399.17	HOXA9	-3.0217278556575	0.644654091916149	2.76747594284027e-06	0.00125725990579239	0.2038381	0.0814488	0.10345	0.1969422	1.3203139	0.821031	6.795302	1.503184	0.862629
ENSG00000137868.18	STRA6	-3.50351280488628	0.752738664563753	3.24996787739626e-06	0.00141199067354803	0.2921248	0.0457273	0.0239736	0.11772225958497	0.0852713	1.0898456533573	15.6368938143408	6.4346503	2.3732500125535
ENSG00000230061.2	TRPM2-AS	-3.58832990423499	0.770372155117006	3.19424240567003e-06	0.00141199067354803	0.2761086	0	0.132193	0.101464	14.24894	0.4085283	7.33854	0.426699	7.023906
ENSG00000104435.13	STMN2	2.93738465586325	0.635030329173108	3.7354855961506e-06	0.00159342231947799	24.295990912	7.1297384464	28.144552	2.442156	0.646864	3.37778	0.524288	0.454428	1.55657
ENSG00000112494.9	UNC93A	-3.70697427383763	0.802698237925186	3.87191668792343e-06	0.00162212566813164	0	0	0	0	0.19577183	0.240346	6.274592	1.394497684839	0.2857157
ENSG00000178965.13	ERICH3	2.82904718653288	0.613811615758122	4.04643780420131e-06	0.00166549960218187	0.1958347	0.1117355	0.198353	0.3483774	0.00813337	0.0507552	0.00987957	0.00894911	0.0374321
ENSG00000171724.2	VAT1L	2.53526525736195	0.551489397371206	4.28362284491612e-06	0.00173272544076857	7.4727	1.92864	8.76319	1.14671	0.579819	0.996854	0.571539	0.854734	0.213996
ENSG00000234906.9	APOC2	-3.07736435227056	0.670505693687888	4.44059970856983e-06	0.00176194667876459	0.571967	0.691451	0.6527223	1.65298	5.151009	1.279011	26.893787	37.841701	8.85327916271
ENSG00000162374.16	ELAVL4	2.5756170953791	0.561557347893782	4.50606541604686e-06	0.00176194667876459	2.4877767	0.9734081	3.88186034743	0.277009	0.24911	0.2302539	0.18827205	0.2416505	0.26569830823858
ENSG00000101115.12	SALL4	-3.06527150150015	0.671295477732766	4.96637573408949e-06	0.00185327058700886	0.3032541	0.0484687	0.0535813	0.195768	0.834642	0.383457	6.84943	3.691127	1.26024436
ENSG00000181085.14	MAPK15	-2.65728756625974	0.582001847474831	4.97660146547711e-06	0.00185327058700886	1.722365	2.743521	1.537935	1.958105	11.052805	2.172972	33.921811	16.209159	31.352174
ENSG00000230316.6	FEZF1-AS1	-3.64251221201944	0.797236385315622	4.90235205568411e-06	0.00185327058700886	0.0884512	0	0.10648	0.0159861	14.33829	0.34931	10.66196	0.0769439	5.617769
ENSG00000225210.10	DUXAP9	-2.95503863209892	0.666406021236792	9.23755200681428e-06	0.00338628449424796	0.6418042	0.334502	0.473561323	0.977326	5.991430424398	0.8154075	31.282199	5.304093	5.332629
ENSG00000131746.12	TNS4	-3.20066476383887	0.724453437259423	9.95996730968123e-06	0.00359493527772971	0.3309665	0.3477287	0.445371	2.068756	48.20285	1.635198	25.04342	9.27473	6.871503
ENSG00000105251.10	SHD	-3.1401436665013	0.713942770265468	1.09095639085458e-05	0.00382013849042376	0.0328682	0.167658	0.0214206	0.1919554	4.3801908	0.4295415	2.4390849	0.908687	1.4348457
ENSG00000095970.16	TREM2	-2.48243067684765	0.564311638946571	1.0872971696804e-05	0.00382013849042376	1.429	0.691064	1.1473	2.36904	2.67753	4.9329	11.34191	18.840671	20.658831
ENSG00000137745.11	MMP13	-3.54324744866686	0.808270761726674	1.16659936526624e-05	0.003966606914277	0	0	0	0	0.126092	0.0196779	3.17999	0.688242	0.671094
ENSG00000196335.12	STK31	-2.70963613033024	0.617990778213005	1.16204481216502e-05	0.003966606914277	0.0654718	0.1564762	0.1100506	0.41463749	2.232178	0.348399	2.23679	3.065137893	2.2282215
ENSG00000185686.17	PRAME	-3.41216263636687	0.78193565700225	1.27858474201808e-05	0.00428526809035516	0.0191017	0	0	0.021116	0.0465082	0.270532	1.94445300706663	0.110287040308	1.0516706249719
ENSG00000099715.14	PCDH11Y	2.65549357400453	0.61199408009757	1.43077986818701e-05	0.00472782063204723	0.9574341	0.130696	0.8955533	0.0924135	0.0440112	0.0615414	0.03790197	0.0580533	0.0775084
ENSG00000244306.11	DUXAP10	-2.74836705907726	0.637428743839909	1.62043761198777e-05	0.00528015094650626	1.447505155	0.8186639	1.322372	2.148888	12.3480634011634	1.64842	50.73642	11.008376	8.341231
ENSG00000185652.11	NTF3	2.27275116892562	0.528087704465339	1.67940185277377e-05	0.00539732148875692	6.868076	18.741795	5.990962	2.587359	1.821951	1.643436	1.941197	1.4555969	0.7922759
ENSG00000174944.8	P2RY14	2.29172456222006	0.534018240588289	1.77492234412346e-05	0.0055098593732472	29.763	28.24046	19.36016	7.138947	2.6368496	1.7981	1.3214107	7.157043	4.781834
ENSG00000133958.13	UNC79	2.23567037037165	0.521107231692247	1.78487409900169e-05	0.0055098593732472	0.1818848	0.0651168	0.238876	0.166678	0.03189072	0.0348176	0.0572919	0.01554416	0.01069102
ENSG00000077943.7	ITGA8	2.7464018503854	0.639714293386701	1.76140485420738e-05	0.0055098593732472	112.2823	29.28354	20.25143	9.82193	2.355868	5.404712	1.420809	10.20392	1.233972
ENSG00000122585.7	NPY	2.25067692300302	0.526831580723612	1.93641147854784e-05	0.00590001944132609	14.6107	6.19106	31.2788	8.23987	1.13151	1.4182	4.53085	4.741154	1.89796
ENSG00000213222.3	AC093724.1	-2.52727360688007	0.592658571786657	2.00530385253126e-05	0.00591837208644871	0.124557	0	0.128341	0.1488	0.54254	0.44058	1.51601	0.82239	0.816196
ENSG00000265287.2	AC005726.5	-2.01280722278652	0.472478697362216	2.04334060356483e-05	0.00591837208644871	0.493596	0.522839	0.574417	0.18931	2.64977	1.33783	1.83874	2.93739	1.37236
ENSG00000144820.7	ADGRG7	-3.41225072478202	0.800690928211338	2.0293869832981e-05	0.00591837208644871	0.0273874	0.0271176	0	0.0641073	8.026934	0.0829493	6.311294	0.4434174	0.1492253
ENSG00000165030.3	NFIL3	2.47069713089359	0.579306553331236	1.99972254981707e-05	0.00591837208644871	108.617	199.056	148.178	9.42348	7.48909	19.8338	20.4628	23.6444	13.655
ENSG00000036672.15	USP2	2.93262334240863	0.689760236830746	2.12195495850295e-05	0.00607112015627289	13.882973	44.139363	6.071863	1.042643	0.8915146	2.426924	0.4765919	0.6379422	1.9042255
ENSG00000203288.3	TDRKH-AS1	-2.38609170338153	0.564868986780224	2.398435686079e-05	0.00677948188326498	0.35642	0.128011	0.156332	0.291622	2.58019	1.06376	2.39363	1.067513	0.948094
ENSG00000095303.15	PTGS1	1.4093737233913	0.334969543864743	2.58247663244254e-05	0.00721279574687314	39.463496	38.456267	38.682067	20.16422409457	9.8663414	19.94816	8.5850355	10.1007183	15.9204122
ENSG00000176533.12	GNG7	1.62122881347591	0.385813870065728	2.64449198431969e-05	0.00721423563303769	8.38427	9.119796	7.996544	12.266832	2.67155	5.132016	1.81511	2.21022	3.64317
ENSG00000275896.5	PRSS2	-3.38518816080829	0.805505459383447	2.63908722201614e-05	0.00721423563303769	0.253318	0.11417	0	0.5244	15.087256	0.803634	136.482699	8.739435	0.8417502639
ENSG00000124762.13	CDKN1A	2.35331613002965	0.562157537116587	2.83636211100805e-05	0.00764872315935172	296.198492	800.7578	509.031083	50.50596	64.568239	48.266334	65.306964	91.79093	59.635434
ENSG00000122176.11	FMOD	0.800962541824348	0.191899177313817	2.99466467159899e-05	0.00789413796184088	79.80399	63.721764	49.8728	57.21511	29.700153	47.68788	43.28161	34.388564	34.93343
ENSG00000233922.2	LINC01694	-2.98699062547765	0.715426515130895	2.97830711395617e-05	0.00789413796184088	0.1946884	0.0223325	0.0312224	0.0300695	1.601553	0.2027065	2.921935	0.287721	0.2205786
ENSG00000105409.18	ATP1A3	2.292116192266	0.549962961848552	3.07601280908546e-05	0.00801848183488376	5.842642902443	1.50516074972	4.759768554644	0.412875642194	0.416962	0.4310456	0.410534603599	0.675404241316	0.528572
ENSG00000147655.10	RSPO2	2.99711590802761	0.721922826609576	3.30196719790181e-05	0.00807378513364222	34.81722	28.045326	6.404993	2.2284522	0.0835776	0.5841981	0.2950777	3.35901	1.297026
ENSG00000121039.9	RDH10	2.49880529151181	0.601486292404398	3.26164408830281e-05	0.00807378513364222	139.055569	266.44176	76.181277	11.837171	15.029345	14.541421	13.737464	28.732618	10.785908
ENSG00000214076.3	CPSF1P1	-3.01105866583542	0.72514688987511	3.29088412259025e-05	0.00807378513364222	0.0142371	0.0137539	0.0288433	0.0412233	0.16219	0.224371	0.801751	1.40471	0.0387804
ENSG00000148680.15	HTR7	2.17535422090772	0.52399826616521	3.30370987097589e-05	0.00807378513364222	0.526219	2.183429	1.529388	0.484471	0.153979	0.227376	0.187121	0.2005796	0.3872695162
ENSG00000196890.4	HIST3H2BB	-3.04175890622541	0.732219144440199	3.26477996055435e-05	0.00807378513364222	0.0464475	0	0.0470605	0.0543622	0.513098	0.251689	0.311871	2.66253	0.147621
ENSG00000174010.9	KLHL15	1.87280222574105	0.449938042884711	3.14981040715902e-05	0.00807378513364222	9.51019	11.0248	12.0882	1.8084	1.2671	2.41273	2.43535	2.80256	2.11912
ENSG00000224397.5	SMIM25	-2.42078026805695	0.585523618777893	3.55905879087081e-05	0.00860815240130104	1.213131	0.717785	0.931633	0.419698637	1.842125	2.699316	17.58634	8.305364	2.155791
ENSG00000144655.14	CSRNP1	2.42171620688674	0.587711959405761	3.77914057788042e-05	0.0090471854181278	141.622979	142.94027	193.147609	9.61742	8.43444	24.7696	22.5770756	26.2627	8.04918
ENSG00000104833.11	TUBB4A	2.94164692299722	0.714923163910013	3.87794782369839e-05	0.00912888751658155	4.95726	1.832076	5.195206	0.3287115	0.0195189	0.547589	0.0409914	0.348784	0.122157
ENSG00000108309.13	RUNDC3A	1.83640139031618	0.446394494923729	3.89109054029306e-05	0.00912888751658155	4.548043	1.615471	4.41743	2.382411	1.28537	0.7026186	0.9385487181492	0.4708666	0.602546
ENSG00000188064.9	WNT7B	-2.95378227685812	0.718768924017	3.96513409676095e-05	0.00921049614298105	0	0.013103	0.0136885	0.0421784	0.255924	0.0266205	0.427528	0.387226	0.576679
ENSG00000255867.1	DENND5B-AS1	-3.06452492695765	0.746392933620975	4.02953441373526e-05	0.0092683242039846	0	0.0568389	0	0	0.410909	0.398859	0.223172	0.566498	0.385093
ENSG00000188981.10	MSANTD1	2.32631223270717	0.568197470371964	4.2363448029358e-05	0.0096494063516191	3.234292	5.1104663	4.21794	0.3973892	0.2202511	0.8879046	0.3495471	0.5578145	0.6555303
ENSG00000120659.14	TNFSF11	-3.13116570203168	0.766238657140177	4.38098353310544e-05	0.00988290910290257	0.0813078	0.0250982	0	0.12687468	0.43642	0.127953	2.8459	6.07058	0.518873
ENSG00000258986.6	TMEM179	2.69423953096962	0.661508529180963	4.64369582680461e-05	0.0103757855040631	3.8667906	0.9341085	2.736123	0.20953485	0.1288847	0.497754	0.0667634	0.0845884	0.189515
ENSG00000134532.16	SOX5	1.75903573909088	0.432480064266678	4.75564811701767e-05	0.0104273140629301	3.1843166	5.249383	2.0659188	1.39914440674499	0.4749368	1.2548636	1.332154	0.634367	0.6824059
ENSG00000013293.5	SLC7A14	3.17303458020819	0.779959238568762	4.73765601691244e-05	0.0104273140629301	0.644526	0.176457	0.673284	0.0187911	0	0.049974	0	0.00881155	0.00921481
ENSG00000099860.8	GADD45B	2.66332916727723	0.661657311495042	5.69173493434047e-05	0.0122508067242717	424.97529	356.27144	1192.88	17.258225	13.2214	60.013931	69.344613	54.386513	63.674419
ENSG00000234155.1	LINC02535	-3.19413937020142	0.793470869740953	5.68475644801547e-05	0.0122508067242717	0.0434556	0.104972	0.0440273	0.0508607	8.69232	0.021406	5.56423	0.320801	0.414328
ENSG00000244953.1	AC087521.1	2.87729558899145	0.716084210391046	5.86701258487291e-05	0.0122898198440807	4.30853	7.2931	19.1502	0.148898	0.128957	0.675474	0.839516	1.04673	0.197268
ENSG00000130429.14	ARPC1B	-1.11325984773421	0.277050427574191	5.86302056318518e-05	0.0122898198440807	94.262832	77.029421	67.923007	93.025886	129.5815895	169.577236	274.753777	272.646367	154.420229
ENSG00000130037.4	KCNA5	2.93115160441675	0.728949483169062	5.79361709077188e-05	0.0122898198440807	6.03656	7.86922	20.9563	0.135741	0.0610094	0.837841	0.352203	0.637893	0.997603
ENSG00000137193.13	PIM1	2.32798952425677	0.580758235089721	6.10966684142258e-05	0.0126848578554527	85.36086	457.15542	164.42797	31.82244	22.438826	36.362843	26.76558	43.71612	24.387462
ENSG00000148798.10	INA	2.88250048564427	0.719485278766441	6.16676499864095e-05	0.0126910941783434	2.57004	0.881052	3.40976	0.0517515	0.0392512	0.195995	0.0158988	0.129588	0.210775
ENSG00000165462.5	PHOX2A	3.14127314017102	0.786525366732247	6.50059284572222e-05	0.0132209821201021	6.21196	1.135164	4.76116	0.0538407	0	0.2042887	0	0.0600139	0.238184
ENSG00000170369.3	CST2	-2.85204060407819	0.714342530640289	6.53695036840649e-05	0.0132209821201021	1.10012	0.0887262	0.279152	0.64355	2.09689	1.44805	2.73623	7.49839	24.9963
ENSG00000166535.19	A2ML1	3.17230120100714	0.795644019857036	6.68897601073921e-05	0.0134128261699105	0.3791912	0.0918987	1.0477175	0.00772885	0.0125101	0.0097548	0	0	0.0287901
ENSG00000102854.15	MSLN	-3.12061706522571	0.785729582688188	7.13863882737884e-05	0.0140739164310197	0.105303	0.111988246	0.051209	1.550983	19.221335	0.15562524	26.5815282424	35.899835518	18.762476
ENSG00000128422.16	KRT17	-2.99057025160601	0.752717601911242	7.09638548812839e-05	0.0140739164310197	4.726011	0.700843	0.334142	0.597933	90.906815	2.2206633	14.901674	26.919376	5.850502
ENSG00000166426.7	CRABP1	2.85976934558473	0.72191490732809	7.45221236977134e-05	0.0144433764351619	24.7681	8.49982	30.810386	0.137019	1.960625	0.7408176	0.93001	0.45843	0.957882
ENSG00000143502.14	SUSD4	2.09919787630047	0.529767045351697	7.41713775566226e-05	0.0144433764351619	4.2666378131031	14.914131	5.81654	4.113938	1.82828180134052	2.0567550878582	0.523578	1.326772	1.640838
ENSG00000229404.5	LINC00858	-3.06416984525993	0.773878247275293	7.51072812365094e-05	0.0144433764351619	0.1059945	0	0	0.0157802	0.781947	0.0597706	2.269429	0.54889	0.128548
ENSG00000258053.1	AC025575.2	-3.02903925898527	0.765388900969358	7.57330350447574e-05	0.0144453067901224	0	0	0.139812	0.107288	0.600586	0.136009	3.45257	3.59489	1.37639
ENSG00000273802.2	HIST1H2BG	-2.88112565417727	0.728733896795473	7.69826010817049e-05	0.0145652322901442	0.301379	0.072832	0.30547	0.940571	6.36091	0.445583	5.02693	22.356	2.60035
ENSG00000261812.6	TUBB8P7	2.83124549328946	0.718950907926434	8.21555868802813e-05	0.0154196177903862	0.361912	0.152163	0.262658	0.103752	0	0.0517162	0	0	0.0414218
ENSG00000082293.12	COL19A1	2.82947061238588	0.721097600751171	8.71491266621503e-05	0.0159734817235993	7.050223	1.785225	2.005658	0.255777	0.0131473	0.39677	0.0239521	0.3925117	0.1935367
ENSG00000143590.13	EFNA3	-2.77452398092182	0.706840347989905	8.66402674778314e-05	0.0159734817235993	1.067421	0.245623	0.4426877	1.592649	21.47512	1.9282	27.91187	1.971272	4.190823
ENSG00000070019.4	GUCY2C	-3.12631932446751	0.79655734222898	8.68058674825705e-05	0.0159734817235993	0.0413752	0.0266469	0.0838219	0.301325	11.340914	0.393945	18.1912221	0.3984032	0.2131912
ENSG00000197472.14	ZNF695	-2.25546139513867	0.578710464225809	9.72342573588743e-05	0.0175919000179142	0.0980399	0.1664757	0.2443262	0.61494	2.177078	0.605325	3.045811	2.255761	2.524421
ENSG00000124374.8	PAIP2B	1.09618722038645	0.281305647914541	9.74786668227633e-05	0.0175919000179142	2.93493	1.8766	2.67107	3.12236	1.14821	1.47365	1.30739	0.933112	1.54623
ENSG00000187017.16	ESPN	-2.03508132939544	0.523469087856434	0.00010120611415958	0.0180201212012015	1.166836	1.2852783	1.3601237	3.3314226	7.269896	3.705262814974	8.693373824	18.320273056	11.55488023
ENSG00000175505.10	CLCF1	2.09673184887464	0.539387378121295	0.000101387664573488	0.0180201212012015	25.2195	60.9695	58.959897	6.959136	4.578207	13.487415	5.1335	6.45296	9.27226
ENSG00000261606.5	AC091230.1	3.18509523976884	0.823635421092581	0.000110129214323413	0.0186813688087629	21.90174	2.21736	32.8185	0	0.0484555	0	0.0294111	0	0.0463448
ENSG00000278621.1	AC037198.2	2.75009999500424	0.710823287928627	0.000109330130269432	0.0186813688087629	36.492	67.4139	81.3013	1.33688	1.66103	6.75704	3.37237	7.86278	0.462837
ENSG00000240280.6	TCAM1P	-3.09256297926425	0.799823583278941	0.000110382954008575	0.0186813688087629	0.0322469	0.015577	0.03809802	0	2.8093293	0.0635283	0.0309194	0.2451799	1.140425
ENSG00000171951.4	SCG2	2.00323285126294	0.517049682312854	0.00010690846838159	0.0186813688087629	13.2833	7.05092	17.891319136633	3.92797	4.10576	1.70872	1.48092	1.69004	1.40208
ENSG00000154975.13	CA10	2.81799606328994	0.728937326544471	0.000110681994135717	0.0186813688087629	0.81467	0.0935703302	0.3568338	0.1322212	0	0.0715541	0.023222	0	0.0219829
ENSG00000253636.1	AC022893.1	2.20680405142366	0.570483371711498	0.00010959423566163	0.0186813688087629	5.19227	2.13113	1.26171	0.433251	0.177622	0.768632	0.244594	0.26062	0.476894
ENSG00000121671.11	CRY2	1.04012900425062	0.268712694434526	0.000108485546038021	0.0186813688087629	31.2114	22.297376	26.526664	12.661144	7.369737	16.627455	11.809392	10.301432	11.870409
ENSG00000103196.11	CRISPLD2	2.14614497754355	0.556570506703333	0.000115249779631058	0.0193133934280304	189.2010629	417.746095	184.173175	33.2325144	14.958635	59.9866119	36.9277278	35.5248434	55.6890825
ENSG00000136267.13	DGKB	2.82133050641047	0.732147383761579	0.000116440897484148	0.019374609190607	2.1885662	4.9027067	1.226573	0.0370208	0.0229831	0.3183908	0.05584904	0.242257	0.1448936
ENSG00000254726.2	MEX3A	-1.61302922758872	0.419851593617813	0.0001220839308486	0.0201705007157677	0.542957	0.335976	0.223402	0.231698	0.702932	0.818772	2.06527	1.718316	0.623891
ENSG00000162344.3	FGF19	-3.13582041240537	0.817297664074908	0.000124639998135291	0.0204488041695948	0	0	0	0	0.0352963	0.0440703	3.06773	0.135977	0.995167
ENSG00000172987.12	HPSE2	3.02106962078841	0.788152297973587	0.000126536493856956	0.0206157825165142	11.088001	12.008548	2.0816597	0.045062	0.05083709	0.4594783	0.0138419	0.64829	0.0655439
ENSG00000272872.1	AP000525.1	-2.61385345471632	0.683905882217688	0.000132401035259041	0.0214224875049128	1.56828	0.981069	1.41351	2.4131	15.5985	0.981188	58.0696	13.7076	6.42412
ENSG00000152954.11	NRSN1	3.06712078037537	0.803474939093046	0.000134909263439866	0.0216788097915253	2.216449	0.393373	1.8350468	0.0182048	0	0.0459743	0	0	0.1153423
ENSG00000181218.5	HIST3H2A	-2.04407012871896	0.535848185594706	0.000136379329478641	0.021765955434683	2.67491	0.699403	1.54018	2.08661	10.1509	4.42244	12.0291	16.0309	2.759
ENSG00000263934.4	SNORD3A	-2.74544845313636	0.722377431430764	0.000144361645625212	0.0224186479441189	20.1398100832511	5.744173	21.0426600110577	64.464660540458	133.693371038343	35.813950443485	1601.7374	179.005300312736	363.842480144882
ENSG00000174015.9	SPERT	-3.05964390886036	0.804364133726174	0.000142490651458075	0.0224186479441189	0	0	0	0	0.140312	0.141445	0.88826344	0.13384	0.314782
ENSG00000110680.12	CALCA	2.60827853685757	0.687162109962201	0.000147212493218096	0.0224186479441189	1.23860723	2.441249	0.861371	0.121902	0.1225124	0.0761591	0.127186	0.1819099	0.119869
ENSG00000206195.10	DUXAP8	-2.58989155379864	0.681045243937628	0.000143059081294912	0.0224186479441189	0.5854579	0.1210505	0.642902	0.8551771	4.2267344	0.4953093	19.277948	3.990966	3.15854
ENSG00000142178.8	SIK1	2.25160232606505	0.593227648334313	0.000147339400094115	0.0224186479441189	6.680725	25.068749	28.521579	3.010646	1.020205	1.920208	5.413397	3.925465	1.757354
ENSG00000141314.12	RHBDL3	1.96726853586035	0.518363679790187	0.000147553511303518	0.0224186479441189	1.023976	2.308177	1.61052	0.3444615	0.213614	0.556423	0.259499	0.163513	0.3406703
ENSG00000187730.8	GABRD	-2.12086184106322	0.5579178017441	0.000143887980493372	0.0224186479441189	0.7488836	0.21645419	0.62058154	0.184957	0.722363	2.2102874	3.241579	5.626734	1.1082395
ENSG00000113328.18	CCNG1	0.612790389585681	0.161506657257062	0.000148113483284533	0.0224186479441189	82.03542	73.733392	83.133717	58.660801001307	34.1547790002956	54.275871	55.146457	57.263119653	57.019479595172
ENSG00000181885.18	CLDN7	-2.87232748343474	0.758498028982489	0.00015256167555049	0.0225728795415793	1.4304389	0.4136051	2.207178	16.022652	243.36489	8.669947	136.81671	88.68525	54.207419
ENSG00000115665.8	SLC5A7	2.85559889169333	0.754216405994323	0.000152981025834837	0.0225728795415793	1.68472	1.02936	1.91196	0.1070206	0	0.08109152	0.00972786	0.0440587	0.221145
ENSG00000117152.13	RGS4	2.66752112279712	0.70431085602069	0.000152219585086158	0.0225728795415793	26.87277	133.882523	21.607315	1.065172	2.39088404092	4.2987299	4.392827	3.783844	7.271836
ENSG00000106484.15	MEST	-2.11168529273568	0.557507206814569	0.000152031552413064	0.0225728795415793	6.704358	1.759804365	2.27367584	3.99328	10.63255402187	4.45721325	48.1745433	21.12300167	22.1034694
ENSG00000135362.13	PRR5L	-2.10303986215953	0.557026118786776	0.000159701113847282	0.0232455347094209	4.853721	0.98206	0.876882	2.853747773502	6.9904239	4.4095002	23.030649701	13.362986	19.491955
ENSG00000179546.4	HTR1D	-2.94149804618195	0.779149628947741	0.000159836232038689	0.0232455347094209	0	0.0184277	0	0.0744102	1.05348	0.338198	1.90222	0.380962	0.0346368
ENSG00000245870.3	LINC00682	3.10657590516975	0.823105145181113	0.000160512195683312	0.0232455347094209	2.1945136	0.835367	1.663049	0	0	0	0	0	0
ENSG00000186594.14	MIR22HG	1.8692313324935	0.49555940311832	0.000161968802451919	0.023312577143095	112.144882	245.931948	81.900819	37.743153	24.95296	53.230283	24.868111	28.58092323	20.945899
ENSG00000118733.16	OLFM3	2.77799868260134	0.737573025802322	0.000165615104909723	0.0236920486358965	0.732743	0.127146	0.449951	0.0635173	0	0.0803735	0	0.0219465	0.0458893
ENSG00000119508.17	NR4A3	2.86879228842855	0.762121657072736	0.0001670708873479	0.0237554550792065	124.56289	86.486933	5.452232	0.792234309123	0.5863523	1.966623	3.1695270115661	8.838848	1.125954
ENSG00000198759.11	EGFL6	-2.85384542058393	0.758748012420796	0.000169062373574947	0.0238938093159146	0.205781	0.0222248387	0.0233038625	0.2690137	0.181488	2.078143	8.92894	3.50107	0.229744698
ENSG00000107295.9	SH3GL2	2.21889207855052	0.59041428947116	0.000171143430790413	0.0239452260180548	1.33875	1.56047	0.71047	0.165808	0.0503031	0.12561	0.101905	0.276833	0.250848
ENSG00000163145.12	C1QTNF7	2.3932188674091	0.636880291463593	0.000171467455395474	0.0239452260180548	44.576369	32.684479	18.695545	2.216794	1.038295	5.040765	1.09396800114408	3.0128561788	6.351864
ENSG00000148339.12	SLC25A25	2.06111765276008	0.550663022264627	0.000181854686975653	0.0252455195925195	35.781492	99.774004178	74.370006	10.1484664	10.1949660304113	13.5598990955144	13.0790010074621	16.001645	4.3957
ENSG00000128045.6	RASL11B	2.10270957734522	0.562133755828949	0.000183591817000477	0.0253367506979305	17.252632	4.18243	12.09329	1.406797	0.684832	1.647675	1.22702	1.623339	2.88789
ENSG00000188869.12	TMC3	2.68742060921013	0.719694504820686	0.000188377904791644	0.0256949652576556	0.701398	0.054647	0.664086	0.0441521	0.00892815	0.0780024	0.0433915	0.00982378	0.0205452
ENSG00000161653.10	NAGS	-1.62230300171237	0.434354524531172	0.000187734331435005	0.0256949652576556	0.257722	0.221394	0.368818	0.419329	0.705235	2.238875	1.171845	1.1934855175	0.6674811
ENSG00000069011.15	PITX1	1.99493782390999	0.534972485932794	0.00019220490413112	0.0257675386046868	162.712331	90.021833	60.356829	23.492586	15.338796	4.864467	16.675423	27.94475	21.659666
ENSG00000181577.15	C6orf223	-2.62620733026417	0.703803658283977	0.000190381691609528	0.0257675386046868	0.178374667746	0.157963	0.139384	0.197177	0.508947	0.1615361	8.27458	1.941021	0.589758
ENSG00000223749.9	MIR503HG	-1.5129556361294	0.405569013274858	0.000191136745014337	0.0257675386046868	4.729695	1.607828	1.944178	1.9434418	3.65232	8.56979	14.75475	8.182426	6.74188
ENSG00000107593.16	PKD2L1	-2.79027499649416	0.749887135139041	0.000198493120790015	0.0264593585616736	0.223504	0	0	0	0.5865472	0.66449	0.9132857	1.38552427	0.6549006
ENSG00000128610.11	FEZF1	-3.03757284880905	0.818759312880726	0.000207283447726244	0.0274750111135899	0	0.0255743	0.0268159	0	7.422346	0.101656	6.808489	0	3.74188
ENSG00000120129.5	DUSP1	2.31722154338901	0.625156810133298	0.000210040012547816	0.0276839816538445	977.185	913.215	748.559	38.8458	60.2332	108.623	166.894	143.465	26.9965
ENSG00000159388.5	BTG2	2.38629609557301	0.644586516576355	0.000213858464240212	0.0278752941136266	721.924	96.37675	1433.65	51.21351	54.88609	62.93675	89.1569	112.67722	54.55305
ENSG00000137801.10	THBS1	2.65691970455807	0.717689541571652	0.000213867820657806	0.0278752941136266	579.52499	2168.537	894.64955	15.983601	15.397909	96.732008	134.20675	153.16692	41.855664
ENSG00000270547.5	LINC01235	-2.51958188468535	0.681963095439511	0.000220231896505534	0.0283902037896485	0.560683	0.136924	0.3304166	0.0368545	0.2936575	3.02657	6.02183	3.91747	0.514693
ENSG00000169994.18	MYO7B	-2.80202729656731	0.75841281552156	0.000220238569955075	0.0283902037896485	1.054798188	0.528443261	2.001588857	1.32691443	50.1678945	2.1912434	55.074274	1.40874231	1.79442669
ENSG00000284948.1	AC107959.4	-2.92174390894662	0.791509921985179	0.000223062768907814	0.0284782960002836	0.055989	0	0.0574701	0	0.240335	0	1.15815	0.838303	1.73896
ENSG00000276966.2	HIST1H4E	-2.71482052412376	0.735518837100432	0.000223349663869919	0.0284782960002836	0.0390481	0.0377471	0.0791591	0.182796	2.18744	0.0769787	1.27461	2.57856	0.390117
ENSG00000273972.1	AC068722.2	2.47508010787483	0.671411427620974	0.000227463365640535	0.0288460433583383	0.583869	4.24272	4.59914	1.02434	0.11509	0.288654	0.422826	0.762936	0.132763
ENSG00000221869.4	CEBPD	1.89100442290083	0.513366901696783	0.000230022611174783	0.0289959264583339	256.463	272.825	291.348	28.3688	27.2851	58.0286	49.5283	76.6221	44.2757
ENSG00000172348.14	RCAN2	2.24915923390156	0.611248995171284	0.00023358893911705	0.0289959264583339	132.44166	189.624794	51.57053	18.55684	4.45153	39.75294	8.5193143	18.6833064	12.1505
ENSG00000267706.3	AC020922.1	-2.76395397616015	0.750986342498576	0.000232839378991466	0.0289959264583339	0	0.0229404	0	0.0151688	0.177007	0.0738883	0.0849629	0.61106	0.0935083
ENSG00000130522.5	JUND	1.09317473824057	0.297081679553966	0.000233498378781331	0.0289959264583339	182.528	238.692146	150.008168	105.395992	64.2371	99.693069	66.1168	100.518	79.0387
ENSG00000186007.9	LEMD1	-2.94499034135476	0.800842604769927	0.000235655980877751	0.0290985524598575	0.124325	0	0	0.0969513	6.293642	0.132021	3.788516	0.457196	0.353277
ENSG00000198963.10	RORB	1.91860981775534	0.522138396629248	0.000238293696097538	0.0292702010688185	0.84381	0.197257	0.321137	0.251634	0.0975477	0.116434	0.0309015	0.144643	0.048794
ENSG00000263513.5	FAM72C	-2.88699703706013	0.786529103701755	0.000242025944809871	0.0294298353704725	0	0	0	0.167918	2.06188	0.175201	1.25765	0.874352	2.3669966
ENSG00000146070.16	PLA2G7	-2.35697345265078	0.64214435461346	0.000242102136588431	0.0294298353704725	1.169488	0.345379	0.363357164	2.05151122607	3.050222	2.56118	6.32889	23.63415	6.63807
ENSG00000253230.8	LINC00599	2.57048245488697	0.701343294117944	0.000247256907072	0.0299015169938979	0.3379738	0.180772073	0.1315417	0.058596	0.0253075	0.0181879	0	0	0.0335295
ENSG00000155980.11	KIF5A	2.24139863613429	0.61395748606206	0.000261486696724924	0.0313818909498081	2.816234	1.03581	3.24925	0.188272	0.0987235	0.387226	0.239818	0.155172	0.554555
ENSG00000137563.11	GGH	-1.88406722490069	0.516173535026343	0.000262173420832973	0.0313818909498081	4.713007	3.012494	3.430186	8.430724	23.308396	6.002318	38.309771	25.673118	22.012371
ENSG00000171004.18	HS6ST2	2.41350260010446	0.661595540673882	0.000264286424196824	0.031474232477572	4.12391	1.96895	3.485766	0.212677	0.0374043	0.676943	0.193116	0.18521	0.484171
ENSG00000251151.2	HOXC-AS3	-2.98364479303637	0.818664815009343	0.000267885577151729	0.0315822287716418	0	0	0	0	2.90768	0.0189253	0.2832851	1.803181	2.991226
ENSG00000204983.13	PRSS1	-2.98307344984943	0.81850745291687	0.000267882819775928	0.0315822287716418	0	0.082823	0	0.1028441	29.986824	0.246773	4.762634	9.087953	0.0430639
ENSG00000185022.11	MAFF	2.39739278100092	0.658294841712876	0.000270715007963715	0.0317562240091835	97.132004	353.737094	43.154981	10.7692339	15.0196373	13.1359819	19.313075	29.170915	9.6584346
ENSG00000168298.6	HIST1H1E	-2.80341665993301	0.770904164867784	0.000276334725697656	0.0322541741273269	0.0906848	0	0.092041	0.0707322	0.572194	0.179042	0.611137	4.73348	0.412091
ENSG00000170419.10	VSTM2A	2.73263392137107	0.751761552431589	0.000278008350431349	0.0322888807399499	0.3571713340782	0.1575275	0.937967	1.737939	0.1180356	0.051002	0.15697	0	0
ENSG00000250133.2	HOXC-AS2	-2.92795932762646	0.807122014134644	0.000286008289277577	0.032573012013307	0	0	0	0	0.390658	0.163308	0.102043	0.300258	0.0965875
ENSG00000075426.11	FOSL2	1.62483574111475	0.447835050445249	0.000285402628309985	0.032573012013307	152.992802	189.50352	169.42055	33.196941	36.72408	46.766579	59.45667	43.249915	23.53144
ENSG00000223561.6	AC005165.1	2.56284795637315	0.705898774245354	0.000282744703408984	0.032573012013307	32.24604	28.860677	11.134046	0.8449435	0.2978695	1.019945	0.734085	2.4432868	4.479862
ENSG00000242207.1	HOXB-AS4	-2.95254153895149	0.813382880681294	0.00028347295143769	0.032573012013307	0	0	0	0	0.540967	0.135636	4.37006	0.597508	0.748707
ENSG00000108691.9	CCL2	2.71272299796145	0.748307970381085	0.000288802203020731	0.0327323115220743	435.3421	3713.888	1161.4795	12.860117	23.130984	71.10245	191.4826	196.24404	58.441499
ENSG00000103888.16	CEMIP	-2.5698947858076	0.709979730042849	0.000294975021142419	0.0330790654905696	0.522352547595434	0.172725480994842	0.422341554937	0.542568236317712	0.474147987263203	1.20952142472699	17.7261216706	6.3669185488	0.68741443611
ENSG00000277075.2	HIST1H2AE	-2.12430704166667	0.586914541947778	0.000295231396901986	0.0330790654905696	1.46183	0.944487	1.15604	1.01314	9.22083	1.7674	3.29637	13.8718	3.98972
ENSG00000237978.5	KCNMB2-AS1	-2.51778922613745	0.695772574499284	0.000296091545672376	0.0330790654905696	0.256102	0.0754836	0.426813	0.199884	0.973193	0.508165	5.554213	1.965609	1.760093
ENSG00000155792.9	DEPTOR	1.37351474504946	0.379965068913141	0.000300527627755137	0.0334155387429539	38.1633	13.9795	34.084055	16.804027	9.28767	6.24788	9.80672	7.60874	13.9263
ENSG00000140522.11	RLBP1	2.57515320923679	0.712727077328979	0.000302559577470736	0.0334827841841554	0.593078	0.518892	1.3842142	0.1915543	0	0.1213756	0.118431	0	0.111657
ENSG00000145194.18	ECE2	2.90359572670989	0.804179229689345	0.000305451114772201	0.0334868626339748	1.452908	0.3332872	1.53762246	0	0	0.133443	0.0464217	0.0117987	0
ENSG00000160712.12	IL6R	1.81824209532664	0.503494953113052	0.000304734202865884	0.0334868626339748	15.4787482	46.7068688	17.7210837	8.3287593	2.875239	10.8089097	4.854753	4.9560652	6.5266521
ENSG00000197971.14	MBP	1.09195433330491	0.302574931615255	0.000307530763870338	0.0335580430286605	28.842996	24.0655300061581	12.7960167	11.19793281741	6.6789927	10.106568	9.39935659	10.1709181577	9.5603692
ENSG00000269155.2	AL009178.2	-2.03914861480112	0.566223517651653	0.000316613042877458	0.034389160180315	0.223951	0.0963834	0.121275	0.0501298	0.508289	0.235854	1.42948	0.864845	0.277644
ENSG00000279622.2	AC025280.2	2.35698148948348	0.655854161432113	0.000325941920720756	0.035239278350367	0.332826	0.998519	0.567863	0.109347	0.0691121	0.1553	0.0335947	0.0152121	0.079528
ENSG00000170231.15	FABP6	-2.63696219859674	0.734089539804402	0.00032795675721183	0.03529446550893	0.2700479	0	0.55829	0	3.305442	1.240869	6.881611	1.456785	0.736681
ENSG00000251003.8	ZFPM2-AS1	-2.19921630137016	0.612851124570868	0.000332585908472919	0.0356292146058592	0.704553	0.265764	0.522718	0.4452973	1.627306	0.707319	1.910498	4.02129	7.463656
ENSG00000235277.1	AF127577.3	-2.9238483215311	0.815899862565956	0.00033890752259863	0.0361414063076658	0	0	0	0	1.97792	0.0853526	0.665851	0.150439	1.10021
ENSG00000148200.16	NR6A1	-2.32690059013718	0.65009953864423	0.000344517190864559	0.0365733837777078	0.267878	0.213373	0.39492	0.143525	1.858414	0.413402	6.687362	0.498223	0.768152
ENSG00000187714.6	SLC18A3	2.83545948905708	0.792887213819925	0.000348732182982977	0.0367788691545194	2.67128	0.743729	2.84411	0.0176637	0	0.156123	0	0.0786464	0.102783
ENSG00000249923.1	AC007663.2	-2.30351604677821	0.644253956252588	0.000349588159987121	0.0367788691545194	0.148984	0.0478932	0.0251091	0.0386715	0.684377	0.171087	0.736945	0.624201	0.13502
ENSG00000105290.11	APLP1	1.02884761091863	0.287886525157729	0.000351843559840006	0.0368509007027071	19.721901	9.016463	11.07504047	10.697634545	5.738588286	6.106943	5.9286297	5.118965568	8.0976480125923
ENSG00000268941.2	LINC01711	-2.58974942991847	0.725626682839353	0.000358369422520565	0.0372022346095353	0	0.0633684	0.0664487	0.102211	0.155039	0.452364	2.83436	0.569591	0.654738
ENSG00000106384.11	MOGAT3	-2.90361195754398	0.813335258454878	0.000356972708100914	0.0372022346095353	0.0685488	0.0251372	0	0.267412	8.141421	0.30450833	23.971701	2.2724606	0.0447975
ENSG00000136982.5	DSCC1	-1.46843413553325	0.412274216760672	0.000368335116054716	0.0379013603410512	1.16488	0.597268	0.963484	1.81783	2.13844	2.427868	5.15707	4.745787	4.341389
ENSG00000184451.5	CCR10	1.2337990725064	0.346364540997661	0.000367843775420398	0.0379013603410512	5.68859	7.8149	6.48596	3.666898	1.404544	3.69006	2.007915	2.421304	3.409177
ENSG00000101349.16	PAK5	2.39602476805273	0.673186206072615	0.000371943216784044	0.0379586743059219	0.303881	0.959673	0.165738	0.0547197	0.00922278	0.0690674	0.0448152	0.0507411	0.0848937
ENSG00000231748.1	AL596223.2	-2.87033991354549	0.806479169338051	0.000372128003510593	0.0379586743059219	0	0	0	0.166452	3.06752	0.211416	7.49493	2.97948	0.194396
ENSG00000258354.1	AC138932.2	-2.8084709160377	0.791065782112327	0.000384884660155685	0.0390899524325218	0.0399165	0	0.027037	0.0311771	1.35762	0.146055	0.11683	1.78473	0.0241695
ENSG00000099617.3	EFNA2	-2.3860108834754	0.672488560607906	0.000388121171822365	0.0392487535005366	0.0670855	0.0648927	0	0.156998	0.370441	0.529431	1.35458	1.10825	0.243809
ENSG00000113722.16	CDX1	-2.90466236272477	0.820641348561076	0.000400881496136235	0.0403651535658893	0.131902	0	0.0445712	0.240123	42.7722	0.433443	82.123	1.031599	0.119806
ENSG00000048052.21	HDAC9	1.42606520787852	0.404077143896149	0.000416832994892606	0.0417919610819463	14.1642473	4.2534695	11.628763	9.9571868	2.3469019	3.6786393	2.24194564098	3.894833582445	5.797943228406
ENSG00000118985.15	ELL2	1.67762344631291	0.475834341486563	0.00042245123488929	0.0418004898838605	38.148058	105.087784	40.040541	17.2996614	9.61299	15.994501	22.1747292	18.4219157	10.686722
ENSG00000164442.9	CITED2	1.87808627951975	0.53315511657584	0.000427353736542819	0.0418004898838605	79.2893158693	197.46787	60.5688370863	22.16661	12.874690854124	42.05146	19.45263159087	21.946570905	16.7253195058
ENSG00000171492.14	LRRC8D	-0.998599140051953	0.283159555965885	0.000420883614782915	0.0418004898838605	4.761864	3.0245238	3.474902	5.28963	8.396069	7.515364	9.547811	10.409873	8.973462
ENSG00000143001.4	TMEM61	2.46982488733209	0.700980104064545	0.00042606712780855	0.0418004898838605	25.9351	5.51852	23.2196	0.762895	1.00841	1.18461	0.144003	2.21873	2.4562
ENSG00000156030.13	ELMSAN1	1.47008622527096	0.417349894809355	0.000427608267854163	0.0418004898838605	27.820361	29.544848	62.229764	11.817957	8.5267294	16.268639	9.6360006	10.048651	12.7227071
ENSG00000115963.13	RND3	2.06700814616595	0.586526822968554	0.000424844646485571	0.0418004898838605	45.709603	162.45588	89.965162	10.523111	8.8925	16.303152	19.056608	26.912386	7.853987
ENSG00000263050.1	AC090617.5	2.31957128902294	0.659443711641265	0.000435687030921374	0.0424134997196944	14.8145	11.7735	3.97962	0.481396	0.324625	2.03786	0.597968	1.07695	1.31162
ENSG00000282988.2	AL031777.3	-2.20435454615014	0.628168134822842	0.000449491959484861	0.0435765738077452	0.2754981	0.2599388	0.2488555	0.2925581	2.124686	0.3808569	0.990927	4.87287	0.724885
ENSG00000278505.4	C17orf78	-2.86864474636529	0.817888260520949	0.000452542784562233	0.0436917953440928	0	0	0	0.0265836	1.742009	0.0671579	2.9543	0.059201	0.0618864
ENSG00000124875.9	CXCL6	-2.6462702784951	0.755090356533899	0.000457337884351051	0.0439737873145902	0.099319	0.319984	0.167759	0.464953	0.444069	0.391523	10.486332	12.2523	0.481062
ENSG00000136295.14	TTYH3	-1.20754308921593	0.345171953916452	0.000468091497927803	0.0448240597260579	19.349551	13.674153543292	11.1658798952	14.644811	19.897345	30.765902	68.698155	48.12811	26.153875
ENSG00000258813.2	AL442663.3	2.10732894774037	0.602661688752246	0.000471045909984485	0.0449236101388049	1.37158	2.86609	1.35785	0.245028	0.198711	0.311925	0.123325	0.447189	0.229277
ENSG00000125740.13	FOSB	2.52834495858807	0.723721348657817	0.000476672723680494	0.045276189353312	125.88338	167.088357	278.77726	11.833615	7.4795921405157	33.409719	7.365106	24.3335120040901	0.449652
ENSG00000187720.14	THSD4	1.21673662959823	0.348590406224284	0.000482211737900478	0.045617619285819	8.9869296	8.14280826153335	3.29048252	6.4761605	2.8044103	2.47420983	2.6786862	3.4210409	3.1708354
ENSG00000205086.7	C2orf91	-2.60841952751586	0.748575158540034	0.000493034357349655	0.0464541327621697	0.028547	0.0137891	0.0489435	0.0334126	1.2600699	0.0421771	0.2490217144262	0.22441850994486	0.23359300313167
ENSG00000177108.5	ZDHHC22	2.34898817142136	0.675414656254857	0.000505460202658244	0.0470579437085916	0.360321	0.0302699	0.222177	0.0733446	0.0123619	0.0308627	0.0300416	0.013604	0.0426736
ENSG00000144031.11	ANKRD53	1.52935365012337	0.439678009447	0.000504512227730467	0.0470579437085916	5.505651	5.00783700224028	4.633131	1.750071	0.615875	2.70034300073611	1.1943937	0.91042696	1.677529
ENSG00000197408.9	CYP2B6	-2.80017220105185	0.804910109138727	0.000503545467116333	0.0470579437085916	0	0	0	0.063963	0.5399450166893	0.2803735280482	3.747825640562	0.277068357002	0.0553541
ENSG00000092068.19	SLC7A8	1.4134651517084	0.406553011606821	0.000507614774165354	0.0470717399869303	16.583328	28.7867542419	27.362387	49.086140290425	13.466751	12.029973	11.370913416896	11.544837181	9.726933
ENSG00000104490.17	NCALD	1.9643967610454	0.566027157642069	0.000519492016069636	0.0474572913739117	46.4553208	54.86662209	41.194746	6.457133	2.181654	16.494929	6.0988007	5.6030694	11.043836
ENSG00000134363.11	FST	2.20846477347841	0.636010430197844	0.000515881061318149	0.0474572913739117	4.624633	36.119346	2.539495	6.409797	2.717868	2.733875	1.54722	2.182616	1.286704
ENSG00000166349.9	RAG1	-2.19287704809391	0.632022620140077	0.000521199100325107	0.0474572913739117	0.181635	0.225772	0.175961	0.117083	2.10635	0.163318	1.23711	0.305864	1.5721715
ENSG00000283496.1	ZNF511-PRAP1	-2.84859842317519	0.821095921698656	0.000521886585161298	0.0474572913739117	0	0	0	0.0631613	7.06728	5.02324	17.0475	0	0.391856
ENSG00000034971.16	MYOC	2.72960276806489	0.786417107601528	0.000518649272273042	0.0474572913739117	142.6278	118.9818	32.21111	1.143991	0.0289219	8.88768	1.04317	7.8321781884	2.92964
ENSG00000138100.13	TRIM54	-2.3642337386839	0.682547149051828	0.000532524247661571	0.047512488873558	0.2251295	0.0274861	0.360606	0.0443827	1.57089	2.707256	1.61006	0.172939	0.5553272
ENSG00000213988.10	ZNF90	-1.48040007065472	0.427392967649128	0.000532619435392598	0.047512488873558	2.260745	0.593624	1.746068	1.591139	4.070651	2.435035	4.796451	5.930848	6.751427
ENSG00000124657.1	OR2B6	-2.73695170121126	0.789922055724932	0.000530551605719632	0.047512488873558	0	0	0	0.105651	0.48077	0.668041	1.04183	3.29729	0.0615275
ENSG00000205336.11	ADGRG1	-1.6368810418922	0.47219663509143	0.000527234357727687	0.047512488873558	9.371985763	11.425274192666	11.6259060861559	20.783003069962	49.257282	45.2818175937416	99.863123	46.534138463	17.7719870512
ENSG00000171223.5	JUNB	1.97470872692499	0.569992646027767	0.000531324855506588	0.047512488873558	903.453	519.288	795.687	65.5462	72.4039	88.5332	137.406	242.245	56.0073
ENSG00000226476.3	LINC01748	-2.58783629237923	0.747655854002579	0.000537639943216612	0.0477786769235036	0.1368203	0.0719742	0.05461231	0.340103	2.084781	0.0395593	7.590009	1.2011669	0.8058404
ENSG00000187479.6	C11orf96	2.37842841169438	0.690282722778064	0.00056982284319899	0.0495055599637615	549.63829	1737.06668	651.12472	25.2885	19.1	164.537019	62.938286	159.623219	86.686013
ENSG00000213186.7	TRIM59	-1.60012910477022	0.46452867208088	0.000571842920173026	0.0495055599637615	1.083753	0.8977654	1.019785	2.5871149	3.399706	3.333266	7.180418	8.8840709	3.881563
ENSG00000228742.10	LINC02577	-2.48291012723332	0.720391010241823	0.000567657884499456	0.0495055599637615	0.0176401	0.0824012	0	0.0813432	0.0974361	0.2057737	0.823612	1.048087	0.501943
ENSG00000144834.13	TAGLN3	2.61434979360952	0.758609642580951	0.000568448325205168	0.0495055599637615	6.41967	0.9771576658	5.868215	1.3119404	0.176843	0.205617	0	0	0.8186616
ENSG00000205659.10	LIN52	0.744016467714052	0.215764009015858	0.000564151908504758	0.0495055599637615	8.251544	6.833337	9.979873	5.770461	2.957474	6.036215	4.8594814919	5.232653	5.192794
ENSG00000179772.7	FOXS1	-2.24805507875961	0.652621227180431	0.000571788353547429	0.0495055599637615	3.5479	0.434205	0.682923	0.735816	0.814966	5.88859	14.5781	7.68847	19.0908
ENSG00000237070.1	AC005550.2	-2.44471184656221	0.709094756946092	0.000565482445817747	0.0495055599637615	0.0425546	0	0.0287374	0.0553419	0.246249	0.0558868	0.0951962	0.320248	0.772761
ENSG00000155011.8	DKK2	-2.44162994188845	0.709093036337588	0.000574631824244388	0.0495641074580793	0.102327	0.0141221	0.177692	0.0540633	0.0559815	0.374363	0.894082	0.936983	2.145773
ENSG00000185519.8	FAM131C	2.04963411790584	0.59582031980056	0.000581670113992097	0.0498947473148168	0.403388	0.29242	0.689161	0.288509	0.0265235	0.198776	0.0645264	0.0292042	0.122116
ENSG00000279137.1	AL356309.3	2.65802127863949	0.772785498586254	0.000582718586772082	0.0498947473148168	0.173895	0.0560192	0.352433	0.0678408	0.0228684	0	0	0	0.0263199
ENSG00000145103.13	ILDR1	-2.6637291498347	0.775000814676404	0.000588051732429368	0.0501682970710015	0	0.0197473	0.0360727	0.3692312816	3.716512	0.223755261929	3.8794238	2.07974484	1.29149351
ENSG00000243709.1	LEFTY1	-2.44241901194279	0.710942112690897	0.000591530907066594	0.0502822703285846	0.551024	0.24323	0.341496	0.0824908	6.526738	0.574833	0.392246	0.932892	4.64929
ENSG00000285848.1	AC025280.3	2.69267540087291	0.78423850156255	0.000595863207332435	0.0504676776434161	0.290836	0.515682	0.234193	0.0346672	0	0	0	0.0430089	0.040389
ENSG00000170743.16	SYT9	2.31632009123453	0.675709509447076	0.000608085592485782	0.0509121580439524	0.5998837	0.1790474	0.2048072	0.0394381	0	0.0497875	0.0323096	0.0438914	0.0481917
ENSG00000167755.14	KLK6	-2.7401737018864	0.799444702522957	0.000608950286852537	0.0509121580439524	0.268333	0.0842774	0.233126	0.1840900717	3.520067	0.340056	27.16252	0.26513	0.0737604
ENSG00000130513.6	GDF15	-2.26315315779134	0.660532261591885	0.000611961492195327	0.0509121580439524	15.1264	2.345673	5.414885	4.969875	15.2474157	8.57235	20.2582899	67.092744	137.799908
ENSG00000143869.6	GDF7	1.86767989304857	0.544979029330192	0.000610137493629036	0.0509121580439524	0.764707	0.465551	0.779917	0.657223	0.0962011	0.44736	0.0636998	0.0529088	0.160969
ENSG00000079112.9	CDH17	-2.78158050593777	0.811535502714302	0.000609048622142094	0.0509121580439524	0.5181079	0.5566511	1.234283	0.5042193	100.234141	0.1360458	43.071147	1.12442	0.444167
ENSG00000232803.1	SLCO4A1-AS1	-2.61927598922163	0.764819340497858	0.000615481030120928	0.0510240298504137	0.0860871	0.1999633	0.446839	0.848119	10.91757	0.875185	20.68254	1.088904	0.608463
ENSG00000164756.12	SLC30A8	1.93789978640464	0.566612125613506	0.000625860770457842	0.0517018293510966	2.086587	0.79613878	1.465711	0.1355318	0.142192215	0.2906786	0.1974901	0.198541	0.3348441
ENSG00000113763.11	UNC5A	-2.00165614387829	0.585516206132526	0.000629400590320551	0.051811814910563	0.125225	0.0268831	0.0986589	0.0434278	0.131752	0.224943	0.346826	0.277883	0.88433
ENSG00000182050.13	MGAT4C	2.46133812739448	0.720880320444145	0.000639342552308261	0.0524462084605039	0.318258	0.5542972	1.310023	0.1412923	0.0067108	0.2565908	0.0199727	0.0251111	0.02627445
ENSG00000109158.10	GABRA4	-2.79370517562487	0.818696911492055	0.000643982130268043	0.0526427343491935	0	0	0	0	0.1671908	0.1392287	0.5472786	0	0.19244636
ENSG00000262302.1	AC003688.1	-2.79206213409244	0.819247399762295	0.00065421285375807	0.0532829313104024	0	0	0	0	3.44502	0	2.08694	2.20815	0.690059
ENSG00000170837.2	GPR27	1.85973677144963	0.545881218816113	0.000657166410003625	0.0532829313104024	5.21127	2.95916	2.08478	0.959831	0.176481	0.749195	0.386148	0.543906	1.44198
ENSG00000187957.7	DNER	2.29909469742283	0.674964295062125	0.00065862708665516	0.0532829313104024	3.933991	0.936168	2.97813	0.2917211	0.155517	0.628813	0.0629918	0.0570487	0.440486
ENSG00000279419.1	AC004925.1	2.46870306447598	0.725576300747567	0.000667960341561991	0.0534280880253295	0.260708	0.11626	0.101587	0.031296	0	0.0197565	0.0192331	0	0.0364201
ENSG00000270210.1	AC104695.2	1.71141283927329	0.50309608261731	0.000669530620154592	0.0534280880253295	6.46574	4.56593	7.44866	0.817831	1.03372	1.12118	1.34566	1.21609	1.74695
ENSG00000140832.9	MARVELD3	-2.45817498578663	0.722336391438772	0.000666285872599877	0.0534280880253295	0.396112	0.1306801	0.5228203	1.289469	13.583902	0.4549035	10.197746	5.833161	1.204969
ENSG00000171159.4	C9orf16	-0.666980064805413	0.196060656452686	0.000669174737750233	0.0534280880253295	117.087021	86.087762	87.38277	96.35946	150.716039	146.920319	190.647051	156.70896	167.511892
ENSG00000166736.11	HTR3A	2.21597345541144	0.652661825718295	0.000685569848480173	0.0545225566616723	2.659959	0.487299	2.32050447746	0.218574	0.366539	0.1839349	0.0684456	0.0973342	0.254394
ENSG00000229961.2	AL357143.1	-2.65703123947063	0.783953803007693	0.000700789271936517	0.0555446523949413	0.00901155	0	0	0.00703181	0.0540154	0.1820105	0.1316572	0.1283439	0
ENSG00000253649.5	PRSS51	-2.51274840630662	0.741750268007119	0.000705086731061461	0.0556971036950604	0.243569064	0.1302238	0	0.169908	0.585811	0.268456	2.400857394	0.303821148	5.1252567
ENSG00000168481.8	LGI3	2.60603719252188	0.77034705477212	0.000717145262065327	0.0564595469574316	0.7761	0.949766	1.12694	0.0403719	0.0816539	0.128919	0	0	0.0313199
ENSG00000140600.16	SH3GL3	2.23491043134599	0.66110251543361	0.000723328200091446	0.0567558625496502	0.187754	0.211706	0.3656179	0.3729249	0	0.0510859	0.0866974	0.0301737	0.085255
ENSG00000181195.10	PENK	2.6616340808033	0.788456453704019	0.000736140284651403	0.0572834232332948	86.381616	12.962349	108.48587	3.929523	0	5.586815	1.690763	0.588703	6.953254
ENSG00000206052.10	DOK6	1.59809596828445	0.473469087699655	0.000737376659837818	0.0572834232332948	1.61357	0.620032	1.86255	0.391082	0.3622265	0.35879	0.343611	0.160667	0.4479575
ENSG00000144406.18	UNC80	1.63277431313611	0.483590167762713	0.000734518450562459	0.0572834232332948	0.2614771845	0.16969498	0.2366506	0.08317729934	0.023963716326	0.06841534568	0.02238345212	0.0696465	0.093302452627
ENSG00000157193.16	LRP8	-1.76017696389681	0.521778125935328	0.000742405137082738	0.0574837192115449	0.9775461	1.5399068	0.476416	0.710742	5.355156	2.5324327	6.2737683	4.013838	1.1433747
ENSG00000180772.6	AGTR2	2.70222069634113	0.802243134603414	0.000756246499241259	0.0583628260483525	2.66087	0.416406	1.67055	0	0	0.0738374	0.0359394	0.0162732	0.136119
ENSG00000203799.12	CCDC162P	-2.55523471942962	0.759504061328098	0.000767251911352022	0.0588251538961758	0.6275575	0.5434935	0.7134413	2.6476609	44.500514	0.9743367	30.653707	2.1248862	3.2195698
ENSG00000178568.14	ERBB4	2.48343821571245	0.738134477264053	0.000766882192222203	0.0588251538961758	0.1315002	0.659256448	0.0766124	0.026398964	0.0241428	0.024984937462	0.00837592	0.003671144	0.0457742
ENSG00000120738.7	EGR1	2.42825843893539	0.723941062008453	0.000795887191356366	0.0608218547114388	654.227	317.605	873.509	7.98173	10.2988	51.3256	37.0532	135.549	13.9011
ENSG00000073067.13	CYP2W1	-2.59014981627519	0.773004873283571	0.000805916185157572	0.0613883104544863	0.023256	0	0.0484033	0.5034753	2.254146	0.417791	1.775232	7.321299	1.654769
ENSG00000248329.5	APELA	-2.6950963896665	0.804660948930286	0.000809994978571213	0.0614993274830396	0	0	0.0211976	0.0163255	0.0705071	0	0.741346	0.181711	0.85916
ENSG00000205837.7	LINC00487	-1.73443649936859	0.51875895425765	0.000827482749464197	0.0626244283392888	0.130129	0.176052	0.1269463	0.0974463	0.546607	0.5532971	0.4640155	0.339091	0.971678
ENSG00000152092.15	ASTN1	2.26879712588444	0.678775876223922	0.000830323094792078	0.0626373315978037	0.958807	0.3347775	0.987586	0.2061426	0.0229376	0.186061	0.013928567105	0.0189269	0.1876007
ENSG00000255126.1	AP003064.1	-1.91513495854013	0.573348703736642	0.000836993497245144	0.0627370748845634	2.46722	1.16591	0.779667	0.840222	11.1589	2.5737	3.36439	9.35496	3.31236
ENSG00000211445.11	GPX3	1.50968210517297	0.451915052258981	0.000835877887108095	0.0627370748845634	209.278216	191.061913	186.997556	143.631968	50.046987	152.239001	37.33534	34.60678	38.849482
ENSG00000123201.14	GUCY1B2	-2.48684060222938	0.744704529021845	0.00083970006463696	0.0627395006893239	0.5580279	0.0181792	0.0314744	0.0229996	2.9461574	0.3817744	1.000314	0.8683505	1.5653884
ENSG00000000460.16	C1orf112	-0.970382386490409	0.29068769681716	0.000843139309795542	0.0627964804670261	1.926053	1.1246902	2.3275225	1.694286	2.87999160045409	2.684853	4.907644	4.6760652	3.587236
ENSG00000277619.1	AC008406.3	2.27148950039125	0.681429866316929	0.000857864439173298	0.0636910050868505	1.20004	1.66739	0.413429	0.0775236	0.101321	0.0421984	0.205526	0.074395	0.16929
ENSG00000184357.4	HIST1H1B	-2.71577520296179	0.81545737548688	0.000867304902420646	0.0641489945418337	0	0	0	0	0.49418	0.103138	0.201237	1.27238	0.569602
ENSG00000154269.14	ENPP3	1.98764613523377	0.596950580919941	0.000869501737534765	0.0641489945418337	2.0305882	2.57361	0.80785	0.529569	0.147273	0.61840183654	0.390467	0.3927777	0.0462183
ENSG00000172460.16	PRSS30P	-2.28900147563009	0.688551217773458	0.000886174011360625	0.0651740704718859	0.5092236	0.1081292	0.228016	0.23631933344	3.684643	0.4898949	5.407797	0.6907283	0.3044748
ENSG00000105605.7	CACNG7	2.36549811934222	0.712619986214619	0.000901987148905911	0.065338403811955	0.349663	0.11286	0.4372133	0.299165	0	0.0198995	0.0591992	0	0.1118985
ENSG00000117407.16	ARTN	1.52973375227687	0.460587421274779	0.000896098031163837	0.065338403811955	7.538166	4.069627	5.567314	1.158248431938	0.692795841	1.6120838	1.448604862376	1.437437	2.19078746
ENSG00000099953.9	MMP11	-2.29080800511838	0.689915722123118	0.00089883028731341	0.065338403811955	5.731071	0.946915	3.863483	3.5113224	1.983873	7.1874346	102.563194	29.529372	16.016728
ENSG00000183833.16	MAATS1	1.58461830675483	0.477348222471258	0.000901376195913668	0.065338403811955	5.811309	4.7736305	5.9501151	3.08723200604449	1.131619	3.271378	0.429052800191466	1.1601972	1.6565727249835
ENSG00000169894.17	MUC3A	-2.65352542420207	0.799415681951285	0.000902333354719467	0.065338403811955	0.7065	0.2176979	0.3557538	6.84754	135.9951	1.664928	53.41992	78.6704575	2.260274
ENSG00000183914.14	DNAH2	-2.15739770554903	0.650469526455268	0.000910946703698571	0.0655574252008349	0.04602278	0.1294937	0.03644448	0.143645	0.3026332	0.0906654	0.661894	0.8865638	1.2916319
ENSG00000109472.13	CPE	1.94477448394884	0.586277827023041	0.000909391178174254	0.0655574252008349	201.591	236.224	75.7934	27.384	5.90991	59.5453	22.963	35.0802	28.1499
ENSG00000254681.6	PKD1P5	2.07959972582544	0.62737791260236	0.000917257510682286	0.0656090806649912	2.55891	13.56766	3.28492	0.714001	0.451669	1.94019	0.8820483	1.08094	0.626887
ENSG00000140749.8	IGSF6	-1.70987989429644	0.515785168543888	0.000916100398976728	0.0656090806649912	1.7977363	1.1247271	1.41813	3.0906234	2.573742	4.67318	6.42638	17.279259	8.493396
ENSG00000115363.13	EVA1A	-2.26860065800807	0.685113821865771	0.000928717041164631	0.0661391684293116	1.39057	0.656477	0.505780478	0.489164	0.549505	2.061378	23.635038	4.490717	2.561455
ENSG00000157654.17	PALM2-AKAP2	-1.54630001332685	0.467047666599555	0.000930306703962867	0.0661391684293116	0.24725500319706	0.13162	0.253536	0.122887	0.214754	0.45214800638008	1.347663	0.927784	0.415708
ENSG00000138135.6	CH25H	2.12470037815961	0.641918898121404	0.000933225469366458	0.0661462318332522	7.47405	38.6372	10.8651	1.6096	1.44094	1.33321	2.56426	4.90666	2.97926
ENSG00000103355.13	PRSS33	-2.61061647866845	0.78914974795595	0.000939184283144485	0.066168776176735	0	0	0	0.0756487	0.715860190633	0.033556172457	0.326792658439	0.349537438419	1.16927000922256
ENSG00000257815.5	LINC01481	-1.09685523707519	0.331550879393301	0.000938788994954285	0.066168776176735	4.71415	3.513351	2.73057	5.14043	7.447804	9.67368	10.28236	13.73963	7.10042
ENSG00000100739.10	BDKRB1	2.20603613339729	0.667418032642875	0.000948649946132111	0.0666355580425313	22.05885	61.234258	22.163011	0.974609	1.530345	3.321877	4.52885	8.09022	3.86078
ENSG00000135838.13	NPL	-1.2315295587337	0.373258493996251	0.000968912942325663	0.067738569274759	6.657448	4.8333181	4.19548	4.864087939812	8.05138	8.2600744	13.0477833	25.7547205855	12.5442535
ENSG00000232712.6	KIZ-AS1	-2.11283740922571	0.640443970870422	0.000970230306011382	0.067738569274759	0.138764	0.0187798	0	0.0306068	0.1400733	0.1371383	0.4176613	0.2893977	0.1261742
ENSG00000162722.8	TRIM58	1.98259361976665	0.601111023387358	0.000973014698674131	0.067738569274759	0.487823	0.240764	0.387094	0.233344	0.0262193	0.180018	0.0637213	0	0.075426
ENSG00000163661.3	PTX3	2.44486501433654	0.741569621937337	0.000977657508232891	0.0678604224871357	7.85607	49.2943	23.0632	0.698605	0.296264	6.37523	1.30253	0.602142	2.38685
ENSG00000232679.1	LINC01705	-2.70621077638236	0.821703966474379	0.000989788603704376	0.0684997947832105	0	0	0	0	0	1.64566	7.09661	0.845775	0.756981
ENSG00000273729.1	AC007686.3	0.781661543899316	0.238114798554089	0.0010281481354958	0.0700501895024435	1.77306	2.09365	1.78193	1.64977	0.883854	1.55372	1.05976	1.05365	1.0741
ENSG00000162989.4	KCNJ3	-2.48252302513455	0.755441710256088	0.00101553424944219	0.0700501895024435	0.1495915	0.0224604	0.10598346	0.127	0.843636	0.3549491	5.32492	0.1201849	0.126663
ENSG00000168280.16	KIF5C	1.50201007597472	0.457662113342384	0.00103103145282818	0.0700501895024435	2.2896574	1.775724	3.0242172	0.807923	0.2392654	1.381105	0.7409853	0.6571661	0.41294
ENSG00000073670.13	ADAM11	1.93815085446062	0.590358701775049	0.0010270666826527	0.0700501895024435	2.057178	1.540743059	2.684884	0.17690064	0.0953314	0.588858	0.2114074	0.491307	0.351878
ENSG00000147592.8	LACTB2	-0.919872535814998	0.28033303003408	0.00103309175089917	0.0700501895024435	10.32925	8.35239	8.25852	6.761657	15.18554	10.511966	22.066926	21.199738	16.144091
ENSG00000152049.6	KCNE4	2.1030915051307	0.640879592575608	0.00103230748898252	0.0700501895024435	61.217004	63.776465	51.51787	2.140601	1.8778116	11.943636	5.131155	8.4343308	12.018651
ENSG00000131016.16	AKAP12	2.18786920974313	0.666077440494241	0.00102088487449401	0.0700501895024435	85.34856	149.4905	57.60305	3.757978	3.019093	18.5581	9.57013	6.031528	22.105954
ENSG00000144130.11	NT5DC4	-2.49125132037349	0.759497040889667	0.00103758154230309	0.0701518748241289	0.0544272	0	0.0325018	0.1400449	1.8981731	1.4244015	0.2182204	0.707391	0.0944345
ENSG00000108231.12	LGI1	2.55388220645309	0.779392008501257	0.00105004797535399	0.0707907343384483	15.7541798799	1.4300623	4.87410484482	0.63238873	0.03786924	0.5898549	0	0.1189547	1.11389919828253
ENSG00000106397.11	PLOD3	-1.14749350988373	0.351163095384275	0.00108427559618807	0.0722124664467849	47.49517	31.672566	38.1900274	37.256997	71.672621	64.963056	124.912426	160.384693	53.143421
ENSG00000231607.10	DLEU2	-1.38989348673543	0.425229518180099	0.00108091501413454	0.0722124664467849	1.30333687	1.056197	1.339649	2.147093	2.215443	2.614541	6.27266864763	7.383501	4.451645
ENSG00000073146.15	MOV10L1	-1.66259130017395	0.508887946594002	0.00108652660396893	0.0722124664467849	0.451272000171044	0.2492702	0.2934728	0.4062958	0.3823	2.563644	1.562212	0.6700126	2.06967449
ENSG00000173083.14	HPSE	-2.0383045750421	0.623653401482748	0.00108184481468126	0.0722124664467849	0.5008639924	0.2984884	0.13835952143	1.127517	1.0329941914	0.9394721685	6.998825035685	4.40711917579	3.487828
ENSG00000224376.1	AC017104.1	1.8444918691036	0.564554115824318	0.00108630060775016	0.0722124664467849	8.88833	12.68889	5.70707	1.488673	0.979164	1.225208	1.217917	1.290172	3.763976
ENSG00000260000.2	AL133338.1	-1.3535789748454	0.414484909138226	0.00109197951889502	0.0723322040082771	0.801332	0.331978	0.54148	0.68476	1.50537	1.20357	2.63756	2.25453	0.901081
ENSG00000166111.9	SVOP	2.01949123535136	0.618520001091692	0.00109449437035669	0.0723322040082771	0.326792	0.1225979	0.246304	0.188987	0.0998073	0.0388117	0.014567	0.0131976	0.0276028
ENSG00000132031.12	MATN3	-1.98937675188285	0.609518701084948	0.00109909885579264	0.072432467010537	1.2975	0.146265	0.954058	0.337466	0.797413	1.926044	9.4269	4.308253	2.41698
ENSG00000065609.14	SNAP91	2.22855812402663	0.684083859578477	0.00112308587746309	0.0738059321321049	3.767632	2.0147421	1.9988057	0.5471125	0	0.8555451	0.252520122	0.2189848	0.24311610295185
ENSG00000279608.1	AL353795.3	1.6184718854121	0.496958245457764	0.00112693149314688	0.0738517870411146	0.100408	0.432299	0.37858	0.151785	0.058025	0.0831153	0.105844	0.0674628	0.101122
ENSG00000265933.5	LINC00668	-2.6804327875649	0.823503957369767	0.00113427566851146	0.0741260207770118	0	0	0.023761	0	24.522431	0	15.050575	3.023094	0.3775228
ENSG00000146469.12	VIP	2.46515817219914	0.758166436622626	0.00114808427158168	0.0748200141543825	37.94688	26.75765	92.88138	0.594955	0.458404	9.199032	0.453126	1.956627	5.685666
ENSG00000112651.11	MRPL2	-0.559849849026355	0.172255095468849	0.00115356042603965	0.0749686458596017	51.671581	40.331602	48.669192	43.980235	56.852547	63.97489	86.94034	84.764519	70.519673
ENSG00000103995.13	CEP152	-1.28277518156851	0.394874135375116	0.00115987790348359	0.0751709820265983	0.929965	0.760224	0.850041	1.768207	2.634801	2.3309183	5.003373	2.569422	2.827763
ENSG00000123411.14	IKZF4	1.9342832847781	0.595613251845868	0.00116403574697531	0.0752326244071287	11.8950309	33.690241	28.109265	1.8002851	1.824123	5.392327	2.872528	5.681452	5.099809
ENSG00000158716.8	DUSP23	-0.851393709642969	0.262291815419152	0.00117047496846523	0.0754409704262713	40.97199	27.6392	23.835059	39.48894	60.42593	63.085525	69.36706	61.33496	65.73611
ENSG00000165828.14	PRAP1	-2.65182981117844	0.817202975872096	0.00117447517453014	0.0754914029305526	0	0.252158	0.132207	3.076005	47.3439	6.34093	215.1121	4.02116	2.325265
ENSG00000162981.13	FAM84A	-1.46714743407218	0.452575338408602	0.00118787750779069	0.0761442464761675	3.532831	2.342092	3.571293	1.8153556	12.920272	3.520144	12.850418	6.4358518	6.590565
ENSG00000104537.16	ANXA13	-2.41377705233947	0.745210069681234	0.00119926078234381	0.0766644610751172	1.62368	0.957077	1.24439	0.15449	28.036865	1.132045	15.774268	1.244605	2.038276
ENSG00000165553.4	NGB	2.63125644155847	0.812717573783183	0.00120538633792396	0.0768466545490055	3.19321	0.31726	2.41936	0	0	0.0588161	0	0.103697	0.108407
ENSG00000136206.3	SPDYE1	-1.01189860245423	0.312721352564459	0.00121309341796278	0.0769199585914184	0.332397	0.176525	0.288218	0.319677	0.545213	0.622305	0.666547	0.640137	0.59762
ENSG00000132932.16	ATP8A2	1.64011097961484	0.506746185674848	0.00120982680767098	0.0769199585914184	0.664743	0.108731	0.70035	0.246807	0.0423035	0.205877	0.154112	0.116349	0.111939
ENSG00000186481.16	ANKRD20A5P	-2.06313213617524	0.638727565954072	0.0012376168387944	0.0780651676436997	0.8639215	0.6195697	0.5302304	2.342452	7.2185262	1.4267785	4.5320379	17.509093	4.632116
ENSG00000168906.12	MAT2A	1.5631087305223	0.48393137501158	0.0012378092307854	0.0780651676436997	356.31782	951.6231	674.303	124.21361	129.02051	194.43499	200.79455	204.1887	127.05806
ENSG00000197927.12	C2orf27A	-1.59038446179015	0.492696443654606	0.0012469405583309	0.0781640990957458	2.62557	0.7929217	2.473332	1.1207753	2.844502	3.354442	14.856598	5.298547	5.42486
ENSG00000231752.6	EMBP1	-2.11884579949616	0.656589194457982	0.00125073842377028	0.0781640990957458	0.1018629	0.0437488	0.1558705	0.2252383	1.385651	0.2640464	0.3244312	1.625894	0.423245
ENSG00000100095.18	SEZ6L	2.03820179293505	0.631803623681916	0.0012553106410508	0.0781640990957458	0.5962222	0.29411	0.908076	1.497615677487	0.2042577	0.362655200957223	0.0552107	0.0323533	0.151082000169834
ENSG00000006128.11	TAC1	2.51377213522647	0.779261295362739	0.00125603620302187	0.0781640990957458	19.255275	56.04137	12.039807	0.1717106	0.1996078	4.845842	0.397875	0.338252	2.864437
ENSG00000130164.13	LDLR	1.65640067925891	0.513320580866026	0.00125167732846208	0.0781640990957458	40.516573	225.3184893	106.697796	46.85006226	31.88378	38.2846554	27.5356189	39.121606	20.046057
ENSG00000154027.18	AK5	1.64786484790565	0.511111173465626	0.00126376762793996	0.078291879072065	2.3807443	1.7025538	3.403075	0.6528858	0.262412	1.3188244	0.5941159	0.289328	0.523482
ENSG00000105825.12	TFPI2	2.20028369609995	0.682819623627347	0.00127143795773653	0.078291879072065	13.382971	43.590985	9.084277	0.641998	2.05605	2.02938507	2.355588	5.12833	1.1848938
ENSG00000135821.18	GLUL	1.76713825868198	0.548145866328249	0.00126481076186505	0.078291879072065	292.9500597	1581.66709149	1475.743619	268.0565267	118.7486171	386.0794983736	264.321326	307.214196	163.523127
ENSG00000233271.1	AL590440.1	1.88440606775334	0.584733909038494	0.00127000533320061	0.078291879072065	3.51659	3.42801	6.9719	2.14136	0.550014	0.338018	0.493208	0.657032	2.3401
ENSG00000087301.8	TXNDC16	0.720172228243017	0.223661164306458	0.00128224030857678	0.0787503661767535	4.5835	4.34974	3.39873	3.250175	1.72663	2.6768	2.64946	2.24985	3.167982
ENSG00000134121.9	CHL1	1.39790214794693	0.434403718122171	0.00129097160041217	0.078750958475081	5.588946	4.0232828	8.867669	1.880737	1.9448698	2.8073798	1.6449724	1.06273	1.5843483
ENSG00000167971.15	CASKIN1	2.04120316012609	0.63437112573421	0.00129231997838567	0.078750958475081	0.625039	0.206167	0.230591	0.0344972	0.00869923	0.0609675	0.0499551	0.0970731	0.0287881
ENSG00000206120.11	EGFEM1P	1.48182263234485	0.460326837651869	0.0012860872389595	0.078750958475081	1.10455	1.0705228	0.989677	0.77838298686	0.1289677513	0.5180602	0.756695548	0.2194685	0.335103637
ENSG00000229970.3	AC007128.1	-2.61500994442132	0.813002711340826	0.00129771918924154	0.0788751033647561	0	0	0	0.0269021	0.314058	0	0.978573	0.179905	0.111055
ENSG00000080511.3	RDH8	-2.64017761866769	0.821088226649304	0.00130234942093801	0.0789519890558826	0	0	0	0	1.145191	0	0.6747445	0.261283	0.4706128
ENSG00000158874.11	APOA2	-2.62991921809161	0.818644500339315	0.00131571853405879	0.0793523715361267	0	0.0668586	0	0	1.29845	0.2525939	6.444528	0.518619	0.0627976
ENSG00000176994.10	SMCR8	0.561052122177044	0.174639367761181	0.00131524429602498	0.0793523715361267	5.53813	5.13423	5.70848	4.63852	2.73868	5.06247	4.49053	3.50326	3.26817
ENSG00000280106.1	AC008555.8	-1.06949996847683	0.333639629683595	0.00134802583359488	0.0810923950819728	0.944855	0.34548	0.672754	0.697381	1.63212	1.48451	1.83736	1.44175	1.1131
ENSG00000250848.1	AC021087.1	-2.23294863896581	0.697195317258489	0.00136117797704493	0.0814100208767869	0.0503254	0.0484483	0.0510211	0	0.31624	0.148208	0.336925	0.261281	0.18205
ENSG00000106018.13	VIPR2	2.24525438775831	0.701113402715201	0.00136281652470117	0.0814100208767869	34.191468	49.43149	18.704643	4.0735268	0.3198671	9.755137	0.5586179	4.196315	4.2382372
ENSG00000277586.2	NEFL	2.42749575962476	0.758065907929436	0.00136371587760868	0.0814100208767869	2.484762	0.420103	3.681801	0.0404075	0.0131969	0.280063	0.0287218	0.1820096	0.2446415
ENSG00000160932.10	LY6E	-1.07520194151886	0.336293084968514	0.00138760533954458	0.082625910840242	206.480466	93.526874	95.783767	122.4216407135	306.769126	206.926812	415.472541	313.552615141613	210.989648
ENSG00000116574.5	RHOU	1.32698781741263	0.415355354528581	0.00139915480699179	0.0831027112071757	36.934	22.9594	43.0966	14.25	11.0361	17.9748	10.2082	4.84282	11.5608
ENSG00000237575.4	PYY2	-2.05274404542365	0.643215110737407	0.0014159475949772	0.0838877437519194	0.229467	0.055482	0	0.358043	1.04096	0.547578	2.162195	0.947508	0.677492
ENSG00000157445.14	CACNA2D3	1.88083635424708	0.589704874070931	0.00142542002563089	0.0842362197010739	5.951786	5.4788327316172	4.729543	0.8506773	0.4650407	1.813207	0.660243	0.23989609	1.599865
ENSG00000285774.1	AL133444.1	2.61551691205325	0.820508597196724	0.00143420329153824	0.0843304346435557	0.0627377	1.27438	0.445413	0.0489445	0	0.061883	0	0	0
ENSG00000147889.17	CDKN2A	-2.36448899570085	0.741629477017267	0.00143144189892883	0.0843304346435557	0.7071993	1.2847929	0.320109	5.841226379	26.05415	3.8732355	3.80213	21.1951485	60.559429701379
ENSG00000001626.15	CFTR	-2.44915198226869	0.768682464188346	0.00144170519798928	0.084348742269393	0.2358068	0.340141	0.111616	2.3688949	7.6135083	0.5144684	14.98562	36.5981861	2.8317703
ENSG00000186818.12	LILRB4	-1.84639223306406	0.579405508605782	0.00143905355040607	0.084348742269393	5.6807726	1.9138038	2.9994402	5.08003240140878	3.094725	10.969287	16.9212594	50.1276468	15.1795134
ENSG00000260476.1	AC104794.3	-2.60711078531016	0.818577061400769	0.00144788937907696	0.084499832643096	0	0	0	0	0.302665	0.0472786	0.09212	0.125025	0.566244
ENSG00000249082.2	C5orf66-AS1	2.47304304950068	0.777614070205651	0.00147124600504774	0.0854378775357056	29.8778	22.66937	7.9951	3.247058	0.856385	0	0	2.21075	2.64409
ENSG00000236714.1	LINC01844	2.32355368183181	0.730505288464527	0.00146895038127629	0.0854378775357056	0.962194	0.596018	0.899933	0	0.0389345	0.072925	0.0236672	0.085716	0.0896154
ENSG00000285906.1	AC083855.2	-1.74112334405891	0.547811884246826	0.0014812941325216	0.0855976395149984	0.946894	0.610578	0.12805	0.886408	2.24092	1.24532	3.51969	4.88448	1.72056
ENSG00000167618.9	LAIR2	-2.22453787475599	0.699778203637802	0.00147825651166977	0.0855976395149984	0.263179	0.143934	0	1.211101	4.6259	1.890806	3.868228	5.757235	1.453808
ENSG00000154188.9	ANGPT1	1.55174599243561	0.488795598358698	0.00150026800646906	0.0862690874994377	16.3599065	5.0371946	8.9556616	2.147091	0.927218	3.559853	1.9539789	3.123629	2.98011
ENSG00000106688.11	SLC1A1	-1.32400242310015	0.416986874644252	0.00149750959719395	0.0862690874994377	0.970323	0.51005	0.823902	1.7855887	2.528151	2.5018	4.361976	2.31706	3.271292
ENSG00000102003.10	SYP	1.37654438795711	0.433765476862173	0.00150625285488359	0.0864014626611832	10.3977049	4.7947784	10.8090302	3.02286	3.238044	3.8531553	1.854732	1.7622846	2.0664582
ENSG00000169245.5	CXCL10	-1.94037790737866	0.613019525718699	0.00154934243682597	0.0886563973423757	10.1435	3.23637	5.63837	3.85643	5.89037	5.94025	37.7436	78.7653	24.1812
ENSG00000162639.15	HENMT1	-1.26502473499941	0.399798188942387	0.00155532205915359	0.0887820214837038	3.958023	2.643948	2.681464	5.147761	10.966815	5.152929	11.54128	12.427804	8.446689
ENSG00000107829.13	FBXW4	1.02626974432089	0.324602524227834	0.00156894305218335	0.0893421673477515	72.840403	60.185884	79.80008	29.388505	18.531176	40.378861	28.00734	24.500357	39.52815
ENSG00000177311.11	ZBTB38	0.474837690643559	0.150256795046289	0.00157674679470138	0.0895691441900461	19.7652048	17.1342233	17.2151942	13.096913	8.7900505	14.0047615	15.0468023	12.330558	13.9388176
ENSG00000257671.1	KRT7-AS	-2.23185039642146	0.707622626201176	0.00161042353097094	0.0910516665729841	0.181645	0.24114	0.0726563	0.412617	1.94648	1.10881	0.132238	5.51654	0.892151
ENSG00000168303.7	MPLKIP	-0.763653169531468	0.242123731092113	0.00161060660789346	0.0910516665729841	17.766126	12.528581	11.968385	14.65258	19.470796	20.536715	33.840378	32.545841	24.089768
ENSG00000149972.10	CNTN5	2.52859247406445	0.801977678128908	0.00161631591753644	0.091154778224333	0.0401103	0.00877216	0.2817977	0.1109539	0	0	0	0.00788482	0.0321422
ENSG00000263818.5	RDM1P5	-1.86247754587027	0.590843890525069	0.00162026986225788	0.0911586360633862	0.1613643	0.0569472	0.0725704	0.044324	0.3150882	0.9539851	0.3020498	0.1946483	0.293908
ENSG00000265415.1	AC099850.3	-2.17436871755577	0.690023236085686	0.00162627334268795	0.0912775093129232	0	0.373116	0	0.598554	1.52359	1.5229	2.61898	4.02566	2.09992
ENSG00000231826.5	LINC01819	-2.42047406289953	0.768569012222718	0.00163647754658717	0.0916310255858747	0.102773	0.0744858	0.249776	0.0200474	1.169515	0.1352544	5.857781	0.1491774	0.264083
ENSG00000260859.1	AC025280.1	2.49321926821071	0.792185413029795	0.00164804210679608	0.0919038964345136	2.41692	6.52125	2.49733	0.474822	0	0.602193	0	0.532287	0
ENSG00000140450.8	ARRDC4	1.32380825537668	0.420658255353341	0.00164959353009653	0.0919038964345136	30.5021	41.0641	22.2192	9.30761	7.81477	15.5966	12.3311	6.17613	9.13326
ENSG00000158104.11	HPD	2.16256416578452	0.687320185920182	0.0016531027788826	0.0919038964345136	3.128471	8.943268	4.140401	0.482477	0.0788324	1.903475	0.285188	0.479736	0.68122
ENSG00000100985.7	MMP9	-2.4068244768063	0.76567038016325	0.00166985389993101	0.0926157029462918	2.35233	0.431967	0.405261	5.59899	3.89867	1.99307	72.4217	79.736	6.55894
ENSG00000109107.13	ALDOC	1.11527563004192	0.355139400158565	0.00168724014935462	0.0933592951509638	16.694693	19.246812	16.103872	19.108407	10.267973	7.902978	11.931054	4.8346917	6.7487539
ENSG00000123975.4	CKS2	-1.78002039678345	0.567332592939937	0.00170380535361142	0.0940540644731237	13.378	11.777	5.06486	26.4611	53.6101	13.8189	84.5569	89.5728	86.0276
ENSG00000117385.15	P3H1	-0.807277646180665	0.257420308356537	0.00171252055502132	0.0943132505665616	21.438325	14.160173	16.632121	12.197108	14.4964221	32.386791	44.990546	32.615936	29.296204
ENSG00000173276.13	ZBTB21	1.78434035800932	0.569112508389852	0.00171676481888826	0.094325572402664	6.8711139	26.622681	5.380867	2.3026852	2.297614	2.8058993	2.799015	3.607738	1.8600779
ENSG00000229689.3	AC009237.3	-1.4013915332465	0.447919816140952	0.00175601744843877	0.0958474646536055	0.7018607	0.4257484	0.637233	1.069581	3.179666	1.296392	2.261923	1.720834	2.050854
ENSG00000196611.4	MMP1	-2.31179815838976	0.738936330400223	0.00175672008017776	0.0958474646536055	1.2493	2.90859	0.316488	13.8239	20.0958	11.9746	123.683	102.182	18.7969
ENSG00000169194.9	IL13	2.42691389243675	0.775568505946156	0.00175279170807894	0.0958474646536055	2.7487688	5.7129805	0.431325	0.0362033	0.0291129	0.2512405	0.1628544	0.483918	0.0791313
ENSG00000166509.10	CLEC3A	2.57511760731116	0.823536779614812	0.00176659676045503	0.0961627067216601	6.10107	0.466208	2.81803	0	0	0	0	0.0739493	0.128849
ENSG00000149243.15	KLHL35	-1.68444678659591	0.538896421028832	0.00177361989334513	0.0962302158950274	0.379234	0.3882213	0.2174398	0.5578813	2.185007	0.4402109	1.312202	1.448208	2.120081
ENSG00000196104.10	SPOCK3	2.29317930387862	0.733806858032042	0.00177777983947824	0.0962302158950274	2.14975506093	0.5580714045813	0.679413032023	0.19748810830408	0.1079191	0.139496433167749	0	0.220201947715827	0
ENSG00000116675.15	DNAJC6	1.5104963996323	0.483412344800051	0.00178014209532594	0.0962302158950274	1.22603	0.6267132	1.9809762	0.258152	0.268741	0.470514	0.375872	0.236551	0.282699
ENSG00000188778.5	ADRB3	2.35106932554781	0.753392120501147	0.00180455455313462	0.0973256422323939	9.489111	0.9901326	2.742877	0.0855586	0.0432615	0.316486	0.10515	0.126965	0.948993
ENSG00000267072.2	NAGPA-AS1	2.0529318374301	0.658122475994791	0.00181234169924017	0.0973983288507378	0.3928142	0.211655	0.121363	0.689619	0.0870386	0.0398507	0.0276666	0.0578124	0.1668741
ENSG00000157766.16	ACAN	-2.37778331265034	0.76233634722139	0.00181420526438653	0.0973983288507378	0.640618	0.6468407	0.076581000864512	0.015913203	0.5052768	3.3710346	8.3965531	9.75839024106718	0.2030507591
ENSG00000238133.6	MAP3K20-AS1	-2.12223638260365	0.680659562591857	0.00182137391654993	0.0975599393976665	0.130749	1.04112	0.335297	0.124952	3.0495	0.365201	1.546065	4.335769	5.083324
ENSG00000232775.6	BMS1P22	-2.55962484552016	0.821416890864647	0.00183254310959972	0.097925554960453	0	0	0	0	0.34117	0	1.39843	1.035187	0.4166112
ENSG00000259807.1	AC009093.1	-2.08450151883934	0.669081858568742	0.00183654764002384	0.097925554960453	0.414976	0.153446	0.0804477	0.148421	0.146172	0.599751	4.03074	1.57362	0.513557
ENSG00000002822.15	MAD1L1	-1.04235765712086	0.334778387572807	0.00184835452821937	0.0983316226452484	10.935979	7.010224	9.31633	12.894431	15.80474	15.798741	24.557493	24.824162	33.273973
ENSG00000236710.1	AC108448.2	2.26642936552375	0.728637986159555	0.00186770106283273	0.0989301916971478	0.663519	0.91743	3.07892	0.221792	0.149519	0.374332	0	0.0824689	0.0861517
ENSG00000129991.12	TNNI3	-2.53987189793477	0.816561509521293	0.00186803950905062	0.0989301916971478	0.15447	0	0	0.141129	8.233107	0.267339	0	1.362197	2.117628
ENSG00000143512.12	HHIPL2	-2.24690817393394	0.722561039188	0.00187312451571687	0.0989760681604359	0.13302789	0	0.1321931	0.1014855	1.702699	0.2022557	0.3020228	1.312173	0.2128789
ENSG00000134020.7	PEBP4	2.1413603623117	0.688995595419282	0.00188393174229871	0.0991007233319958	2.651377	5.140242	0.953448	0.56395	0.0570276	0.855956	0.139064	0.188599	0.656905
ENSG00000011566.14	MAP4K3	0.809601458392621	0.260454638541597	0.00188092879794331	0.0991007233319958	23.403083828	25.5877790002765	22.9630620001497	13.70003536118	9.131663	18.128380707	15.142873	9.781789575	12.123514998
ENSG00000271849.1	AC012603.1	2.31933689746173	0.746587254917935	0.00189261777217034	0.099334911751428	1.37757	4.15302	1.55597	0.477383	0	0.756868	0.295699	0.13336	0
ENSG00000088002.11	SULT2B1	-2.50648908132448	0.807011421020592	0.00189706970858507	0.0993463223953447	0.201503	0	0.232636	0.6321719	10.788042	0.51573	24.456687	0.105053	0.939207
ENSG00000179528.15	LBX2	-1.72320333017771	0.555120258693262	0.00190795444479765	0.0995838968694865	0.489356	0.6242958	0.371529	1.104135	2.786232	0.79525	4.132162	3.8457547	2.538013
ENSG00000169429.10	CXCL8	-2.46478907254551	0.794102824157202	0.00191009563067512	0.0995838968694865	11.13511	5.459848	16.424129	3.108422	5.364009	16.133252	751.5388	133.7058	1.684684
ENSG00000198780.11	FAM169A	0.960809054310556	0.309678866049793	0.00191829972523725	0.0997898666381178	0.3020394752	0.2014372140197	0.325106	0.297903	0.14979	0.1597803514146	0.163308	0.1329445214808	0.14047528676712
ENSG00000196843.15	ARID5A	2.01394535191842	0.649278369236421	0.00192334148269003	0.0998307843482099	62.406346	422.878602	59.384445	17.762162	11.776457	31.5617055	33.310309	40.3398041	25.8022988
ENSG00000164932.12	CTHRC1	-2.12708697888859	0.686752245516237	0.00195283253169832	0.100286615065658	21.290329	3.278308	4.998533	3.25527	4.966444	21.709349	169.32405	80.070956	18.91574
ENSG00000161912.18	ADCY10P1	-1.31441895423029	0.424387694705962	0.00195349657239699	0.100286615065658	1.17318	0.8366453	0.755774	1.347128	3.450557	1.779178	3.786444	1.5790313	3.636336
ENSG00000145040.3	UCN2	-2.24649292530539	0.725128070632644	0.00194789580268391	0.100286615065658	0.533029	0.189621	0.0397651	0.0918261	0.18572	0.734727	6.13998	2.73052	0.419375
ENSG00000155090.14	KLF10	1.7038650672904	0.549928675781587	0.00194609151266078	0.100286615065658	103.45405	106.21191	157.54693	9.887656	10.233777	35.220827	34.96778	23.184559	25.78025
ENSG00000146521.9	LINC01558	-2.05719841273169	0.66388011973316	0.00194339038595528	0.100286615065658	0.771159	0.0833981	0.1336625	0.1775231	1.261449	0.749965	5.30489	1.116966	0.574363
ENSG00000261026.1	AC105046.1	2.05317139658275	0.663066502456142	0.00195833836175196	0.100315668788347	0.628609	2.32765	0.647307	0.106277	0.0578711	0.288911	0.291229	0.20922	0.0380486
ENSG00000251026.1	LINC02163	-2.53731519992909	0.819997556089155	0.00197280519531176	0.100836563588691	0	0	0	0	0.423536	0.132728	2.20284	0.350823	0.244228
ENSG00000228649.8	SNHG26	1.98700897727694	0.643315055638651	0.00201032472838021	0.102530931418539	6.57424	21.33469	12.405549	0.973222	0.844485	4.69883	1.36628	2.78403	0.880291
ENSG00000167470.12	MIDN	1.40113645051423	0.45409416088721	0.00203166713318255	0.10339466943947	100.550041	190.40596	124.09116	32.62874	32.603006	41.825511	46.77691	60.82689	24.968422
ENSG00000141485.16	SLC13A5	-2.45801919173045	0.797269512311372	0.00204892953125853	0.104047479941248	0.0191153	0.0300172	0.0195855	0.00795776	0	0.0453674	1.397347	0.2647702	0.08495385
ENSG00000156006.4	NAT2	-2.31024424964129	0.74962903370107	0.00205718462114638	0.104241054852516	0.26874	0.0433043	0.0908127	0.0349452	2.29701	0.0883132	1.688059	0.3389	0.353977
ENSG00000189120.4	SP6	-2.20501164711293	0.716850948404477	0.00209819312798864	0.106089890033925	0.321087	0.1078910230798	0.16746	0.45149265816	0.2643830233663	1.353705	9.1099	1.66073000015788	0.215482
ENSG00000101825.7	MXRA5	-1.38907876165909	0.45213319568454	0.00212431952626715	0.107179914851083	5.89902	4.39714	3.15688	4.0227	5.9697	7.16048	32.9933	12.9528	9.87883
ENSG00000241015.2	TPM3P9	-1.73937277476378	0.566369903908131	0.00213279071560599	0.107376401242129	4.41245	1.767096	2.13388	2.67772	23.56879	3.06321	11.0566854	9.37247	5.5113017
ENSG00000263786.1	AC022211.1	-1.78232152303174	0.580695934739965	0.00214571539358348	0.107739870599526	0.291511	0.282157	0.197279	0.151574	0.919641	0.479707	1.0294	1.77546	0.529916
ENSG00000272986.1	AC009570.1	2.27199992617845	0.740354197034077	0.00214919481013504	0.107739870599526	0.460906	10.4382	1.96484	1.07848	0.072704	1.27403	0.710026	0.160391	0.251339
ENSG00000181773.6	GPR3	1.71133502214963	0.558186687884652	0.00217028293256614	0.10856504878664	2.59809	6.44157	2.95168	0.389054	0.621218	1.03432	0.830846	0.980187	0.738778
ENSG00000261618.1	AC083837.1	2.25657699833738	0.736605949781478	0.00218779420756589	0.108976305528033	0.107924	3.52784	9.34802	0.715796	0.468383	0.124033	0.275979	0.968476	0.179659
ENSG00000166278.14	C2	-1.82008172327201	0.594112498742961	0.00218741951585047	0.108976305528033	17.3772876	6.82893	6.5432634	16.8894773	26.626767979	19.435836	179.153938	53.0131606	21.629998
ENSG00000237424.1	FOXD2-AS1	-1.94860451702831	0.636434898023572	0.0022004718891781	0.109375574135609	0.413543	0.25237	0.132311	0.968027	2.06092	0.750509	4.13344	5.50088	0.810327
ENSG00000223403.4	MEG9	1.86807733722082	0.610728659927506	0.00222249123105246	0.110236504802794	10.083051	10.50749	3.939789	0.579039	0.357845	2.35956	2.09564	1.317858	1.1102291
ENSG00000162510.5	MATN1	1.93270559367202	0.632369409336302	0.00224092869968403	0.110916515239002	0.1628669	0.666264	0.1375746	0.2147449	0.0109918	0.13381966	0.0818493	0.0422702	0.0639328
ENSG00000115137.11	DNAJC27	1.22675272695257	0.401680100273017	0.00225771419289645	0.11127779974694	5.1923047	7.901041	5.309801	2.0297127178	1.2593093	3.388943	2.934837	1.608845	1.970873
ENSG00000173198.5	CYSLTR1	1.38092614245869	0.45211719507425	0.0022554546849237	0.11127779974694	11.162706	9.888723	5.470751	2.74274	1.028642	4.795634	2.544787	3.434505	2.053544
ENSG00000064218.4	DMRT3	-2.41534616154736	0.791239060117429	0.00226858757524781	0.111345885152487	0.0506869	0.0244903	0	0	0.0799892	0.583996	0.340377	0.550323	0
ENSG00000229320.3	KRT8P12	-1.04415163434818	0.342018900542446	0.00226636741002278	0.111345885152487	3.750091	1.747373	1.398339	1.6213	4.82714	4.20886	4.06547	5.81778	4.06284
ENSG00000213760.10	ATP6V1G2	1.70299823853495	0.558161593384435	0.00228016322726714	0.111447728072738	5.677968	2.179558	5.8614	0.771009	0.221297	1.237847	0.944387	0.811503	1.610782
ENSG00000189190.10	ZNF600	-1.70779436069385	0.559633694917695	0.00227603295206078	0.111447728072738	3.043763	2.564661	3.061298	6.2077929	29.195472	5.4653254	20.070257	13.352216	6.733862
ENSG00000272995.1	AC097505.1	2.22644023665194	0.730022976000754	0.00228976922012965	0.111684564809691	0.550356	0.932972	0.699062	0.429154	0	0	0.265582	0	0.250253
ENSG00000136997.17	MYC	1.9641934740538	0.644343243916993	0.00230090172617823	0.111994720742464	120.074683	333.398243	213.595732	18.76318454	20.260148	41.06580732	84.979752	26.0982824	7.121221886
ENSG00000050344.8	NFE2L3	-1.67545354639586	0.549919219398151	0.00231347983157749	0.112373810204223	4.8521	3.03014	2.994446	10.73797	14.67156	6.98011	37.08925	39.49345	17.57938
ENSG00000185105.5	MYADML2	-2.39326551627338	0.786809372414447	0.00235218965524831	0.114018019631778	0.0223163	0.0215634	0.0452205	0.0426253	0.193381	0.0439724	2.22612	0.0193821	0.222909
ENSG00000063046.17	EIF4B	0.788970262923008	0.259654677471167	0.00237730158297867	0.114761054399717	196.182773	186.006684	196.92897	107.7193543	67.7736441	159.177127	95.9162667	97.4639809	100.7605487
ENSG00000088305.18	DNMT3B	-1.32068952682996	0.434594104411592	0.00237440930994643	0.114761054399717	1.090022	0.2066487	0.721447786	0.82548337	1.374608	1.50507	3.5476278795	2.13672860699	1.60222205
ENSG00000250853.1	RNF138P1	2.49037392742974	0.820136992420551	0.0023931505404328	0.115015687022071	1.30613	1.12485	1.18001	0	0	0.143492	0	0	0
ENSG00000101306.10	MYLK2	-1.82839736984621	0.602358398434632	0.00240218603814052	0.115015687022071	0.0388532	0.0375395	0.2150646	0.1103746	0.502279	0.2091375	0.618746	0.24581	0.706629
ENSG00000179270.6	PCARE	2.31900343394321	0.763939641335138	0.00240069838906657	0.115015687022071	0.234986	0.1276998	0.1339385	0.0229204	0	0	0	0.019126	0.0333345
ENSG00000122756.14	CNTFR	1.91651243436917	0.631189642852028	0.00239461521217683	0.115015687022071	4.0263	3.114869	4.7503941274	1.700087	0.4135378	1.778897	0.13404886285	0.101172	1.08412
ENSG00000231784.8	DBIL5P	1.64670821702513	0.542859746636198	0.00241818587848278	0.115545944796506	1.4420215	0.70128	0.335861	0.2574636	0.260385	0.2324617	0.1597117	0.105724	0.147386
ENSG00000251138.6	AC090502.1	-2.49118170126426	0.821532305755253	0.00242649627155278	0.115707376070935	0	0	0	0	0.482437	0	0.978438	0.29466	0.367414
ENSG00000114346.13	ECT2	-1.51311771067758	0.499315935115601	0.00244245110399392	0.115775184490077	3.09284	2.607476	2.496002	9.417098027	12.1373469	10.1091960003412	14.619706059	22.124976524	20.2333513
ENSG00000167705.11	RILP	0.837884647126483	0.276429537723286	0.00243667233027225	0.115775184490077	29.75205	14.69268	21.431	19.181861	10.61183	16.763829	8.863751	11.32802	13.00861
ENSG00000261888.1	AC144831.1	1.45055185323194	0.478675039289544	0.00244272265984349	0.115775184490077	3.15126	5.91165	1.7207	0.97396	0.823472	1.29017	1.099	1.27954	0.724654
ENSG00000116254.17	CHD5	2.03265832742831	0.67120897407294	0.00245889925999036	0.116306926489181	2.81836	4.213416	1.729341	0.1094219	0.355373	0.960424	0.13546411	0.293078	0.212534
ENSG00000173621.8	LRFN4	-1.2365836445343	0.408533791774812	0.0024709026649692	0.116639532037912	6.109789	3.530244	6.201634	9.839262	17.82861	9.30601	20.823921	21.111418	16.589997
ENSG00000131398.13	KCNC3	-1.53814993551653	0.508504653286122	0.00248757055624521	0.117190547831464	0.950474	0.3486219	0.4787919	1.1985417	3.7181207667	1.018514	2.54931432	2.986828	2.28528382
ENSG00000138795.9	LEF1	-1.78134836076216	0.589094755321565	0.00249560287282574	0.117333344688105	3.228634	1.1879737	1.1119916	5.83111476942	2.5567684	10.4826470094356	27.447836	16.044003	14.4988149
ENSG00000185875.12	THNSL1	-0.964336006517268	0.319170208111164	0.00251621389610007	0.117751226761994	0.93575	0.581853	0.627061	0.864959	1.63582	1.19111	2.128599	1.254095	1.69926
ENSG00000170345.9	FOS	2.12718296700376	0.70392295295906	0.00251195643729646	0.117751226761994	1317.968548	201.873735	1558.379268	69.05761	99.05619	68.8004	120.50322	257.81245	9.512569
ENSG00000224950.2	AL390066.1	-1.42579533291066	0.471963904872431	0.00251954800880274	0.117751226761994	0.406449	0.0462061	0.36337	0.317137	0.77348	0.871578	0.917378	1.24596	0.586194
ENSG00000005981.12	ASB4	-2.41530076753004	0.799954800625468	0.00253362400325927	0.118173663499932	0.027728	0.254685	0.0421307	0.1123086	6.135182	0.2076827	0.1268841	1.626942	0.0503519
ENSG00000135747.11	ZNF670-ZNF695	-1.74029269929872	0.576684305255304	0.00254653594136259	0.11851992833355	0.0671026	0.0590752	0.0399178	0.0461161	0.2244	0.0590702	0.311339	0.403231	0.18571
ENSG00000137807.15	KIF23	-1.65512850796661	0.548563042666278	0.00255115143465507	0.11851992833355	2.793074	1.4661007	0.9218257	3.646463	5.3235613	2.1408812	15.9140292350808	11.77646	10.2034835
ENSG00000162704.15	ARPC5	-0.644699751340079	0.213835337443402	0.00257033904768964	0.119175344659776	76.000572	54.324531	70.585162	64.911104	89.212862	100.476332	165.06858	112.194895	91.811507
ENSG00000152147.10	GEMIN6	-0.884008531592872	0.293726433848639	0.00261564225932187	0.121036652950592	4.70378	2.91729	4.95999	4.50498	5.51005	8.04617	12.31745	6.44844	10.89258
ENSG00000278996.1	FP671120.1	-1.44440849019777	0.480875504497161	0.00266713190559037	0.121502100266128	2.26369	1.91257	1.16247	2.08207	3.02884	2.94045	4.45635	13.931	5.99829
ENSG00000145692.14	BHMT	1.43259851263247	0.476726091970804	0.00265513809868637	0.121502100266128	1.66665	1.154206	1.48537	1.704171	0.6287099	0.906181	0.094685	0.3036158	0.570438
ENSG00000184557.4	SOCS3	2.05757917950942	0.684435097747988	0.00264496315758577	0.121502100266128	335.691	467.163	662.722	14.5931	22.1754	54.9801	133.998	101.002	12.372
ENSG00000235859.5	AC006978.1	0.953701666352331	0.317330869051575	0.00265244237402843	0.121502100266128	9.72033	20.2075	13.7478	10.7309	6.28862	6.94835	7.9365	8.95483	6.79868
ENSG00000280441.2	FP236383.1	-1.44440849019777	0.480875504497161	0.00266713190559037	0.121502100266128	2.26332	1.91223	1.16406	2.0816	3.0282	2.94156	4.45846	13.933	5.99636
ENSG00000238290.1	AL034417.2	1.87299020221842	0.623322210916969	0.00265711213247504	0.121502100266128	0.545075	0.921817	0.773255	0.0850594	0.107522	0.295399	0.13074	0.0710199	0.0494988
ENSG00000278058.1	AC009159.3	1.21292956254812	0.403344770770548	0.00263685223777835	0.121502100266128	4.82454	4.90983	3.96726	1.29766	0.918536	1.97031	1.52094	1.95348	1.66304
ENSG00000135472.8	FAIM2	1.17350673474142	0.390370130726733	0.00264588329049043	0.121502100266128	4.5894216	5.021403	4.959602	1.825064	0.872584	3.1792073	2.003729	1.267514	1.95675
ENSG00000164176.12	EDIL3	1.39929813944567	0.467023516863709	0.00273362701504703	0.12395478948573	21.882854	36.317549	19.0437432	15.148082	9.4265868	4.62742	9.363317	14.83411	3.73049
ENSG00000271079.1	CTAGE15	-2.06088644628068	0.6879140638443	0.00273682200049479	0.12395478948573	0.162517	0.0383844	0.119932	0.428882	1.56184	0.150875	3.25061	1.06764	0.596113
ENSG00000204584.1	FLJ45513	-1.58319390677238	0.528381747857604	0.0027327120102842	0.12395478948573	0.634812	0.255609	0.45563	0.866804	1.69053	1.19887	5.10062	1.60826	0.96079
ENSG00000159640.15	ACE	-1.62982794759978	0.544267432901743	0.00274863402336118	0.124249909098414	11.4101464	4.0700101	5.4331271	7.47377454818	49.0210177656945	18.7850388	22.88339	28.4703637	6.095976
ENSG00000281706.2	LINC01012	-2.21319753254183	0.739946295179976	0.0027804314161609	0.12544557972029	0.0195475	0.0188866	0.1271815	0.2643866	0.836833	0.1429575	3.121211	0.6370875	0.5129409
ENSG00000135917.14	SLC19A3	-1.92646284205242	0.644489034181989	0.00279771170812695	0.125741598437484	1.2412394	1.3715357	0.4815738	1.215320748	9.193515	2.89062843	2.477486	13.462879	0.7352331
ENSG00000116285.12	ERRFI1	1.98098174751134	0.662727868105741	0.00279770311364052	0.125741598437484	102.93378	636.92437	221.35633	20.962311	15.77813	95.002875	31.62842	71.191785	36.210889
ENSG00000267385.1	AC011498.4	1.72656295874404	0.578244107335326	0.00282770864984234	0.126604718767082	0.578985	1.70766	2.43359	1.07696	0.546863	0.647373	0.150429	0.136176	0.379431
ENSG00000164764.10	SBSPON	2.074269090993	0.694561949698288	0.00282244222356892	0.126604718767082	65.8828	48.5405	13.076295	2.091015	0.792928	10.6162	1.49859	5.97078	7.34027
ENSG00000174145.7	NWD2	2.01588088035492	0.675296978956299	0.00283414454534492	0.126651171768261	0.160825	0.125462	0.137818	0.0289603	0.0195246	0.0548206	0	0.0161101	0.00561571
ENSG00000182912.6	TSPEAR-AS2	-2.13884075952412	0.716887828097782	0.00284964340191164	0.12710168032747	1.280043	0.0219541	0.2094944	0.2729963	2.070673	0.417789	3.969464	8.14789	1.871962
ENSG00000232850.3	PTGES2-AS1	-1.74355252983918	0.58477240147553	0.00286754168561304	0.127657296937699	0.185154	0.102243	0.321621	0.350849	0.87657	0.367742	1.92859	2.07139	0.361758
ENSG00000279845.1	AC097372.3	-1.9799212290169	0.664833250214274	0.0029006791846562	0.127918861562442	0.565074	0.365208	0.191643	0.146875	2.22811	0.745855	0.546884	2.62803	1.37162
ENSG00000014914.20	MTMR11	-1.13622289606522	0.381427347947964	0.00289312475918213	0.127918861562442	27.589194	14.119137	18.713702	18.135056	52.46157	32.17821	81.49743	44.14612	24.413876
ENSG00000141736.13	ERBB2	-2.2450193798327	0.753496823741389	0.00288749756454577	0.127918861562442	22.0123465	14.8677066	21.380879139445	41.2381763	168.8282036	15.6419117	1159.926154	39.9326177	26.522153
ENSG00000281406.1	BLACAT1	-2.30147102181365	0.772738557301583	0.00289823027809615	0.127918861562442	0.0539621	0.0521356	0.0364445	0.589479	4.03093	0.106314	5.62307	0.656064	1.40461
ENSG00000094755.16	GABRP	-2.32684685619994	0.78076364783862	0.00288042134598557	0.127918861562442	0.17995126306	0.0624482	0.5508076	3.064196	11.000331	0.6384522	4.442963	48.4992113	7.469471
ENSG00000164574.15	GALNT10	0.618843275307681	0.207846519567124	0.00290699679910469	0.127956945410498	28.823113	15.8657445	21.0397355	22.544524	12.3465529	14.1537508	15.8101587	17.8223882	14.8267483
ENSG00000227019.2	OR7E101P	2.3182114535992	0.779919862291572	0.00295509025510962	0.129830285533945	0.801805	1.39868	1.12011	0.125035	0	0.158626	0.309915	0	0
ENSG00000197381.15	ADARB1	1.65503183660288	0.556953081842629	0.00296269600584589	0.129921142043272	52.88806122647	51.7771960030165	46.774092	4.419723	4.1247259	15.773987	8.6614962170095	9.4352929	16.4538627
ENSG00000130158.13	DOCK6	-0.515807861702667	0.173743443068134	0.00298974474953027	0.130502133364725	35.924839	27.452097	35.995631	31.52131318193	37.686707	50.959045	69.266988	48.006116	45.538651
ENSG00000224137.1	LINC01857	-2.21877066341548	0.747439909556484	0.00299263235796522	0.130502133364725	0.171807	0.166526	0.174728	0.401877	0.135471	1.01997	0.996734	6.58903	3.28295
ENSG00000185418.15	TARSL2	0.714055027986791	0.240488412269632	0.0029858898789098	0.130502133364725	11.925751	10.101034	15.263731	10.568151	5.240096	9.717431	6.166193	8.6196651	8.631787
ENSG00000180720.7	CHRM4	2.07468396212255	0.69993879812231	0.00303576144573582	0.131898381286813	1.18833	0.148222	1.12677	0.239267	0.181471	0.075568	0.0736015	0	0.139263
ENSG00000244675.2	AC108676.1	-1.79600329335779	0.605922703668615	0.00303589471441452	0.131898381286813	0.0230254	0.0701421	0.0678846	0.113295	0.207093	0.191763	0.278473	0.827435	0.197762
ENSG00000067842.17	ATP2B3	2.25324649414951	0.760488341995924	0.00304761305336956	0.132162753872649	0.2343197	0.2936995	0.4941201	0	0.00637602	0.0256212	0.0124689	0.04815099	0.0653173
ENSG00000186350.10	RXRA	0.818405883253443	0.276368014581542	0.0030635316770293	0.132607964344621	39.179609	30.3627059	34.046401	17.235727	12.606564	26.323586	18.737771	13.065782	17.71828
ENSG00000159307.18	SCUBE1	1.95154314492938	0.659456180812125	0.00308316818399751	0.132905825846688	9.2973853	19.445222	12.035022	1.7128148	0.6389936	5.454091	0.345859	3.0054628	1.3785589
ENSG00000196550.10	FAM72A	-1.08035502558664	0.365190409835376	0.00309307279793237	0.132905825846688	1.403219	1.083349	1.602421	2.326636	3.625457	3.041301	3.826932	3.54649	4.932241
ENSG00000169495.4	HTRA4	-1.96216876752879	0.663086047492647	0.00308492391195408	0.132905825846688	0.0795609	0.102513	0.10749	0.206926	0.292961	0.20905	0.610638	2.58001	0.38533
ENSG00000120251.19	GRIA2	2.33741045212267	0.790048530729128	0.0030907439049474	0.132905825846688	2.8664114	1.5513019	1.7534012	0.0200125331892	0	0.030959230666771	0.120963	0.0258708	0.4337014
ENSG00000271127.1	AP000526.1	-2.31545140724272	0.78295614611758	0.00310326471028449	0.133099987875657	0	0.245376	0	0	0.643578	0.125102	1.77864	1.63343	0.585668
ENSG00000255501.2	CARD18	-2.43485813149509	0.823574572373808	0.00311201352011934	0.133134366272433	0	0	0	0	0.0537661	0	1.090357	0.340876	1.571919
ENSG00000103550.13	KNOP1	-1.50419974033473	0.508925259438249	0.00312021277571324	0.133134366272433	10.302922	5.68237	7.915931	23.501478	52.958103	20.726016	44.543563	54.70158	31.085677
ENSG00000141741.11	MIEN1	-1.82292618866564	0.616780064795979	0.00312109038190351	0.133134366272433	40.854645	40.889367	37.577058	47.940452	161.17496	43.639785	703.75661	89.213892	78.984439
ENSG00000196411.9	EPHB4	-1.05394191666945	0.357228377408042	0.00317433765784843	0.134997189171594	16.67588	7.710124381473	10.7510530003489	17.488207	17.851767	44.371349	36.207429	38.354314	18.8102688
ENSG00000100557.9	CCDC198	-2.35404265899481	0.797941889070526	0.0031762690602583	0.134997189171594	0.126196	0.127009	0	0.2564894	5.4473913	0.1669858	0.4220861	4.2987911	0.1350758
ENSG00000107282.7	APBA1	1.09656911128152	0.371902919501695	0.0031928304868506	0.13521118420939	4.4066551	3.2938682	2.8557271	1.1984631	0.8145059	1.8976982	1.4280001	0.9502943	1.7655387
ENSG00000060718.21	COL11A1	-2.39256162189806	0.811419570511936	0.00319204275611401	0.13521118420939	0.77307800622933	0.2034510471895	0.8716599675853	0.0259848	0.0677383	0.39598230163625	48.621371	8.6417977	0.9366499234324
ENSG00000106404.13	CLDN15	-1.78501557427585	0.605916152221018	0.00321935434369882	0.135844014851651	7.883714	3.572763	3.558227	7.38396	18.790924	17.433467	76.726246	20.733561	3.201822
ENSG00000198774.4	RASSF9	-1.25689537460586	0.426610979140175	0.00321669921254484	0.135844014851651	0.605069	0.141686	0.492123	0.364837	0.4847	1.47166	1.18623	1.63968	0.699169
ENSG00000272482.1	AC254633.1	2.20847160213398	0.751745582892291	0.00330559508646272	0.137689486612745	1.98016	6.10773	1.68785	0.258011	0.262026	0.656311	0	0.578216	0.301708
ENSG00000282033.1	AC074387.1	2.14343055586115	0.728971983845214	0.00327844911438206	0.137689486612745	1.85063	0.91615	0.490988	0.377437	0	0.477527	0	0.140283	0.0732865
ENSG00000130287.13	NCAN	2.17621751247579	0.740590374264225	0.00329815148885108	0.137689486612745	0.046512	0.0313845	0.0329083	0.1134965	0.00641002	0	0	0.0141049	0.021118
ENSG00000145979.17	TBC1D7	-0.958954230921644	0.32641291088346	0.00330490156317898	0.137689486612745	7.2053612	5.884559655867	8.404713377669	9.7442872	10.8275063014057	11.892249	26.8548106	20.1381412	15.867622039
ENSG00000182472.8	CAPN12	-2.19335953564876	0.746707483419279	0.00331004093813513	0.137689486612745	1.5678628	0.5342263	1.1255429	9.796677	56.725558	4.4878715410178	17.494174	72.142381	5.862687
ENSG00000115255.10	REEP6	-1.86606026814016	0.635002299113275	0.00329627077722555	0.137689486612745	0.945838	0.335187	0.734869	2.9329186	6.702015	1.98848	13.19617	2.528467	9.4110934
ENSG00000165730.15	STOX1	1.74980824397592	0.595449983959023	0.00329664482073668	0.137689486612745	3.013582	1.950675	4.432271	1.529886	0.834122	0.529788	0.136507	0.2335896	1.415487
ENSG00000166106.3	ADAMTS15	1.81043268896211	0.616164879832729	0.00330094537048748	0.137689486612745	4.02206	15.6022	2.00893	4.66469	1.442	3.78017	0.589691	0.741463	1.51736
ENSG00000146049.1	KAAG1	-2.41574731633238	0.822735488602742	0.00332219181213805	0.13795034000809	0	0	0	0	0	0.0961279	0.24507	0.576308	0.278166
ENSG00000272068.1	AL365181.2	-2.25119121374058	0.767006676817156	0.00333510386374527	0.138241822875138	0.0498909	0.0964011	0.0673876	0.804537	9.00216	0.917368	1.67434	0.332157	1.72142
ENSG00000234350.4	AC007405.1	-2.17153820402098	0.740023639529995	0.00334174543172114	0.138272821117477	0.0257855	0	0.0261275	0.0804776	0.1819043	0.0254067	0.511401	0.491625	0.4569318
ENSG00000270106.6	TSNAX-DISC1	-2.11408912710331	0.720895524821766	0.00336150301735278	0.138845461778369	0	0.0206655	0	0.0164524	0.0344717	0.1256968	0.1302556	0.0660516191434	0.05315940423337
ENSG00000021826.15	CPS1	-2.19810437023944	0.749848487064001	0.00337440136628754	0.138948326809276	2.543503	1.2309717	1.385791	0.29678005	37.368828	1.700315	1.3809557	9.03998	1.618858588
ENSG00000215784.5	FAM72D	-1.76523104922144	0.602207781215794	0.00337583846729839	0.138948326809276	0.325449	0.0889945	0.450082	0.887184	2.56024	0.870622	1.09862	1.76537	3.558
ENSG00000179914.4	ITLN1	-2.41145970174806	0.823334931831332	0.00340171788838913	0.13938355934606	0.255615	0.0494353	0	2.55265	112.179675	1.76433	81.6754	95.78639	0.0928779
ENSG00000123838.10	C4BPA	-2.34950297302178	0.802244299510432	0.00340423594498496	0.13938355934606	0.1234899	0.0237707	0.0249247	0.0575814	1.86337	0	1.449029	1.11103	0.022338
ENSG00000175894.16	TSPEAR	-2.09390312313803	0.714880742159712	0.00340027750237619	0.13938355934606	0.2406094	0.056244	0.10832632	0.1355925	0.2901808	0.1448254	4.1243111	0.6887695	0.1763248
ENSG00000236790.5	LINC00299	-1.84466377684288	0.630013278943481	0.00341176350995181	0.139448403670696	0.0938492	0.076479	0.0326477	0.1527846	0.3961548	0.1010957	0.4895417	0.811062	0.3928595
ENSG00000113448.18	PDE4D	1.59701757681364	0.545881909982419	0.00343822094388013	0.140285394024994	21.8394685	33.979916849296	30.3923425	4.8856807	3.6630224	10.5167257	3.8327768	3.575527	12.152694
ENSG00000152422.15	XRCC4	-0.695254461317517	0.237854058003932	0.00346643517830217	0.141191034232894	4.847006	3.98246	3.763931	3.4325219	5.392983	5.658858	7.4471212	9.671973	6.41079
ENSG00000164181.13	ELOVL7	-1.29088258376269	0.441826049596142	0.00348128164284926	0.141549997613321	1.787469	1.924589	2.221922	0.767656	3.684741	7.657666304921	6.831099	3.851006	1.597793
ENSG00000125675.17	GRIA3	1.41434421029001	0.484472190548736	0.00350761411654395	0.142373935619788	1.199341	0.636313	0.9468219	1.2389153	0.5763189086	0.506623	0.3767022	0.1235716	0.163548
ENSG00000167646.13	DNAAF3	-1.75284933964502	0.600652048851595	0.00352008591690765	0.142633394985441	0.299964	0.140285	0.220662	0.4400480245946	2.45763801	0.75052817	0.665098	1.124094	0.762794
ENSG00000065320.8	NTN1	1.84380342573514	0.632072340249859	0.00353329002492963	0.142921581508403	53.649456	51.76986	57.52917	6.2543721	1.537	12.6703	4.22753	6.5657377	21.604375
ENSG00000130294.16	KIF1A	2.09457351772568	0.718261691870964	0.00354356857914411	0.143090641024613	3.7034928522	0.9697577135	4.82833883	1.0373567339	0.7545703	0.59841593	0.0361301	0.0245462	0.3002905
ENSG00000143768.12	LEFTY2	1.83765247734712	0.630598058703337	0.00356667287093952	0.143776137843835	6.38669	1.490721	0.876351	0.300627	0.1642488	0.723932	0.30417	0.454781	0.654961
ENSG00000149503.12	INCENP	-1.1687032614758	0.401235606074688	0.00358249145557702	0.143919232943994	3.635356	1.5527106	3.591453	5.13006726	6.426046	5.715716	13.919842	10.319199	8.58663
ENSG00000136943.10	CTSV	-2.18849504568873	0.751261463854912	0.00357867189158055	0.143919232943994	0.2613561	0.036091	0.2024977	1.6091637	13.047474	1.1131099	2.6614513	1.9155657	5.3297
ENSG00000048471.13	SNX29	0.568149840389352	0.195147810488164	0.00359833690008081	0.14430868720136	6.0382967	5.5631702	6.318959	3.848154	2.548221	4.939148	3.894306	4.38045	3.671356
ENSG00000157152.16	SYN2	1.94356726388309	0.667896642822278	0.00361449476318899	0.144709320203374	3.779883	0.9028060623171	3.956772	0.2647342	0.0480871	1.005523	0.3732344	0.5375312	0.1664002
ENSG00000175003.13	SLC22A1	-1.61698027050243	0.555836538053467	0.00362478829529917	0.144874204763226	0.17974	0.322144	0.4240731	0.123729	0.7143649	0.4886259	0.8002278	0.822685	1.8142645
ENSG00000153132.12	CLGN	1.88446941961968	0.648084437675518	0.00364035829888365	0.145002455093564	3.203381	2.149855	7.48171	0.3741923	0.167386	1.0393	0.2943262	0.499754	1.393404
ENSG00000138079.13	SLC3A1	-1.62330379447208	0.558216657149811	0.00363728010428857	0.145002455093564	0.4099026	0.1716517	0.3234189	0.6600123	1.746089	0.6836719	3.2909964	1.604982	0.534884
ENSG00000055609.17	KMT2C	0.518209106370067	0.178421354456272	0.00367943731078608	0.145081140753533	13.462174	11.389128	13.454647	10.5477581	6.3750334	12.24612	11.0338315	8.0123002	7.9023272
ENSG00000133863.8	TEX15	2.22774840589398	0.766471802635514	0.00365499777343833	0.145081140753533	1.009212	0.0914939	0.09347841	0.00398221727	0.00805431389	0.0150758163	0.014579	0.0220133	0.0782706
ENSG00000162772.16	ATF3	2.00567869184479	0.690012736399538	0.00365231724741859	0.145081140753533	194.84433	236.012230009	94.6500100576741	7.606857	10.420865	14.736933	12.4248656	71.966483	7.24742
ENSG00000181634.7	TNFSF15	-1.73673186461043	0.59792987733425	0.00367752690447733	0.145081140753533	0.610115	1.1981026	0.502178	0.894723	3.375334	0.8554524	4.133002	8.876165	1.0532407
ENSG00000133106.14	EPSTI1	-1.47573936534359	0.507914739378505	0.00366682789125672	0.145081140753533	10.486125	2.6026329	5.3906078	6.893551	10.2497528	9.8855179	53.268811	20.2824935	14.450699
ENSG00000049246.14	PER3	1.33646746751661	0.459994167441547	0.00366782977847005	0.145081140753533	11.15996032	10.814484615	17.49949491317	6.5874929796	1.77899410668876	8.2830056869	2.95082448	2.587873165	6.794395163
ENSG00000109458.8	GAB1	0.823431685315928	0.28363513914578	0.00369444907026398	0.145428640331314	14.1266864	5.974097	10.2745491	6.7729153	2.9841084	6.4374024	4.9023224	6.2669377	6.3096864
ENSG00000133119.12	RFC3	-1.32127221957064	0.455708708454331	0.00373902734926395	0.145866806856158	3.502628	4.16807	3.480755	4.9876667	10.74549	5.344756	26.627519	10.030129	7.557799
ENSG00000164066.12	INTU	1.31203123278765	0.452571939385169	0.00374288469065288	0.145866806856158	8.519712	7.831354	5.866363	1.682608	0.946892	3.5724747	1.8550873	2.524057	2.826344
ENSG00000259209.3	AC004943.1	-1.74771089750609	0.602713328696212	0.00373474384547898	0.145866806856158	0.304729	0.166828	0.116617	0.1533318	1.062257	0.447376	0.491632	0.544205	1.0714894
ENSG00000272183.1	AC005041.3	-1.96804600680446	0.678675112189565	0.00373358854851106	0.145866806856158	0.447498	0	0.113608	0.52349	1.67627	0.331519	2.91132	2.92122	1.11874
ENSG00000030582.17	GRN	-0.926415174092105	0.319343072155274	0.00371970451980455	0.145866806856158	137.455413	69.94745	91.333859	122.810477	171.578265	144.532422	247.203074	317.079906	207.007093
ENSG00000131771.13	PPP1R1B	-2.33427849388899	0.805074593814047	0.00373810610589011	0.145866806856158	3.270448	1.99275	3.2303426131	48.113027	703.33653	9.4539775	521.2589	6.2381303	112.926994
ENSG00000120318.15	ARAP3	-1.01094721028019	0.348860776338741	0.0037572677643671	0.145942481820888	11.832829	4.585289	6.422285	5.950744	10.116017	23.415983	15.572174	21.344169	8.605144
ENSG00000115641.18	FHL2	1.28666347118012	0.444002399193391	0.00375700245278755	0.145942481820888	224.719556	306.02496361	182.117117	94.065602	68.4376503	103.775461	43.728737225086	51.92325	129.195731
ENSG00000139970.16	RTN1	1.49535422605542	0.516172877432978	0.00376746497929814	0.146096687403824	15.3481528	4.61293	13.8067782	3.702716	0.8008345	3.2632377	1.881069	5.3097992	3.7703583
ENSG00000196976.7	LAGE3	-0.778706853184977	0.269192642124718	0.00381885862827318	0.147398453416456	19.7231	12.6541	15.7871	16.5894	32.5459	24.7509	33.026	33.4226	22.7961
ENSG00000170677.5	SOCS6	0.774090839695939	0.267737213488218	0.00383732716825641	0.147398453416456	6.925159	10.45918	9.11246	6.92103	5.0694	5.83454	4.57208	5.3636	4.666983
ENSG00000273218.1	AC005776.2	1.31707810633046	0.455320999732947	0.00382023240328891	0.147398453416456	2.04994	4.33404	1.78532	0.77473	0.707638	0.883833	0.891428	1.00173	0.901751
ENSG00000162998.4	FRZB	1.84800151591913	0.638967209675101	0.00382591399646846	0.147398453416456	151.551	127.287	94.8966	7.51989	4.84663	18.7025	12.137	18.462	47.7281
ENSG00000104112.8	SCG3	1.83049378284892	0.633143756296686	0.00383873044786901	0.147398453416456	1.0487	0.436436	1.138382	2.277252	0.40739	0.605409	0.270167	0.0627873	0.0585971
ENSG00000165502.6	RPL36AL	0.829522844022015	0.286834415918644	0.00382807660929253	0.147398453416456	368.51	516.944	322.763	357.975	170.324	328.46	186.748	235.823	248.872
ENSG00000111860.13	CEP85L	0.98521972811577	0.340857866157417	0.00384737010287167	0.147488807162536	2.6163816	2.6268115	2.831287	5.0206184	1.3349771	2.2670387	1.5555792	2.103299	1.5702975
ENSG00000234352.9	AC009264.1	2.28788178691022	0.791740301271411	0.00385625370890723	0.147588202715616	0.246956	0.2882338	0.2083766	0	0	0.0304205	0	0.0268166	0.0280342
ENSG00000237686.6	AL109615.3	-2.00863173438153	0.695422419219665	0.00387253833630814	0.147970068254276	0.0494647	0.0477988	0	0.1100369	0.214667	0.170577	0.237256	0.983059	0.157213
ENSG00000168702.17	LRP1B	2.25837143183287	0.782157850302513	0.00388489228059707	0.148200744382257	0.890983	2.303621	0.5922813	0.06133245	0.00242792	0.2328299	0.0029479	0.136871	0.1248958
ENSG00000143196.4	DPT	2.08886438506701	0.724075040142162	0.00391571844005041	0.149006348119797	147.028	564.518	180.406	21.8308	2.5252	105.321	19.0055	12.5249	45.6976
ENSG00000133065.10	SLC41A1	1.4555289869558	0.504580451047003	0.00391871262051551	0.149006348119797	17.904504	56.843178	23.920568	6.8607521	5.220445	12.403926	10.916955	8.610635	9.909998
ENSG00000154556.18	SORBS2	1.91202823396991	0.663123754761084	0.00393450482454135	0.149246409057714	258.035713	120.5175386	206.587908054114	18.2379646	6.618567	78.04461911533	7.8493467	13.621808054	42.3674156335884
ENSG00000230666.5	CEACAM22P	-1.97371550394893	0.6845795797988	0.00393774891124525	0.149246409057714	0.0178468	0.0344854	0	0.0278683	0.0563302	0.287871	0.1765124	0.186128	0.0486151
ENSG00000101680.14	LAMA1	-2.06682011188824	0.717152112205661	0.00395181200437118	0.149537841023471	0.4428844	0.1895893	0.0581879	0.158369717	0.6952427	0.298076	6.0802094	0.8676666	0.1865122
ENSG00000253301.5	LINC01606	2.33717501354612	0.811836320227467	0.00399096910703597	0.150776370724913	0	0.9021778	0.3986878	0.0187443	0.0189555	0	0.0230442	0.0208653	0.0436294
ENSG00000224243.1	SOX1-OT	2.19512432195445	0.763147975680085	0.00402230465842345	0.151607635871188	0.727728	1.55115	2.81065	0.45395	0	0.431724	0	0	0.397135
ENSG00000183798.4	EMILIN3	1.79332742390411	0.623521971693785	0.00402589647277396	0.151607635871188	3.89084	0.716639	5.65441	1.23427	0.649382	1.50035	0.244629	0.161332	0.630153
ENSG00000158555.14	GDPD5	-1.32977431284168	0.462722401034638	0.00405558270503187	0.152236841348404	10.0327758	3.5007633	3.8210074566361	3.923974362	9.439371	13.3331143045033	35.629016	12.13649416164	6.88443200735332
ENSG00000125895.5	TMEM74B	-1.56050150660495	0.542990603947735	0.00405435397551892	0.152236841348404	3.51303	1.20335	1.344392	4.598054	7.7374	9.898145	17.71073	13.14821	2.438113
ENSG00000204970.9	PCDHA1	1.42600428157843	0.496699681366978	0.00409228961202423	0.152880902209714	0.108508	0.0602326	0.182737	0.139565	0.0508259	0.029331	0.0319709	0.0630176	0.0368157
ENSG00000132000.12	PODNL1	-1.83472840717543	0.639030695513014	0.00409031163291173	0.152880902209714	1.944512	0.5087071	0.7467527	1.6892644	1.85483517882	1.406985	21.006236	4.2939823	4.365028431
ENSG00000259030.7	FPGT-TNNI3K	1.60557268502479	0.5592213484772	0.00409063986486775	0.152880902209714	1.6743598	1.564029	2.0575189	0.45713100359836	0.2859717	0.7210623	0.1254967	0.1742745	0.73429894
ENSG00000092051.16	JPH4	1.42594316697325	0.497821575317509	0.00417844976355203	0.155851526077415	1.6069423	0.897155	1.315696	0.4667428	0.180862	0.737506	0.1586384	0.212301	0.5347517
ENSG00000277726.4	AL109811.4	2.08086433924075	0.726790325886221	0.00419534612150214	0.156233357708828	0.531697	0.610472	0.585954	0.291175061	0	0.172848	0.154564	0	0
ENSG00000168546.10	GFRA2	1.8162272070103	0.634919346377713	0.00422888645958804	0.157065484083976	3.919076	5.20539140373	5.749607	1.6699736	0.295383972	2.8825452	0.1792824	0.363889	1.1348167
ENSG00000157399.14	ARSE	-2.05623902496479	0.71886436252575	0.0042310807698339	0.157065484083976	0.928542	0.205682	1.453732	2.398707	12.6845741	1.159264	21.773521	10.690225	0.783234
ENSG00000250292.1	AC093844.1	-2.35372024553449	0.823348451069899	0.00425358019075658	0.15765125569564	0	0	0	0	0	0.256029	0.083133	0.413759	0.432474
ENSG00000234146.1	AKAP8P1	-2.1866409826719	0.765042714436716	0.00426058965965961	0.1576619779263	0	0.0422856	0	0.0341242	0.172542	0.0431177	0.126005	0.380077	0.278087
ENSG00000260597.1	AC012531.1	-2.27488904218799	0.796109099085717	0.00426980311491342	0.157754095872415	0.0607941	0	0	0	0.271835	0.0399275	0.505309	0.105596	0.036802
ENSG00000233818.1	AP000695.2	-1.9367107384562	0.678192764325657	0.00429429326794692	0.158160776074259	0.0975475	0	0	0.422623	0.57241	1.151592	0.64696	1.11849	0.779872
ENSG00000168490.13	PHYHIP	1.92939714773145	0.675617193733606	0.00429346362654566	0.158160776074259	16.724506	17.706064	3.429721	0.831016	0.3348417	5.014095	1.42334	1.682879	1.2278
ENSG00000113525.9	IL5	2.15717304925841	0.756145296058428	0.00433283579304933	0.159330188935314	0.468789	0.927085	0.6170925	0.0555958	0	0.0703163	0.0784837	0.14188	0.0741197
ENSG00000145107.15	TM4SF19	-2.22935520791775	0.782332432054405	0.00437705999164742	0.160704545327136	0.0421705	0.162116	0.0368564	0.0634515	0.272242	0.23795	2.558621	1.2841911	0
ENSG00000264019.1	AC018521.2	-1.88790264297727	0.662730361754994	0.00439018620460889	0.160934622728639	0.703599	1.77571	7.42335e-09	2.90704	8.21802	2.62322	7.75754	12.2493	8.641568
ENSG00000142661.18	MYOM3	-2.03901840230453	0.715943450619772	0.00439927127958338	0.16101607408784	0.0806362	0.2142559	0.0512481	0.03145922	0.26437722	0.493223	2.6100115	0.4288885	0.0549151
ENSG00000283849.1	AC092053.2	1.96337098537394	0.689734857559665	0.00441945349838743	0.16150280144185	0.248482	0.780664	0.440743	0.0727037	0.0245076	0.0306087	0.179074	0.134912	0.0283064
ENSG00000183395.4	PMCH	-2.18301493842379	0.768444085882677	0.00449970397592631	0.162333043601856	0.097344	0	0.0900864	0.158538	0.0934779	0.546002	3.6021	0.651216	0.174399
ENSG00000172687.13	ZNF738	-0.877079144718327	0.308736493762118	0.00449911503597242	0.162333043601856	4.223636	2.226002	3.8022772	3.7753097	4.1620966	5.096237	8.596974	9.709057	7.759267
ENSG00000225880.5	LINC00115	-1.12403170420807	0.39571693301798	0.00450436738100605	0.162333043601856	1.22693	1.23632	0.729757	1.42779	2.61992	1.41551	3.64818	3.57367	2.8645
ENSG00000112559.13	MDFI	-1.04933151475225	0.369136921818578	0.00447384826866901	0.162333043601856	6.638914	5.626812	3.549919	8.607738	14.350452	13.577821	21.241794	12.040893	10.008338135734
ENSG00000260123.1	AC013565.1	2.20318757058221	0.774779481180423	0.00446025579114014	0.162333043601856	2.15073	3.18561	0.257044	0.0986578	0	0.250041	0.366091	0.110154	0.115034
ENSG00000177000.12	MTHFR	0.73792851762964	0.259554358914537	0.00446827107883439	0.162333043601856	17.6731166	16.155015521449	18.043002848537	11.1377393	8.8543492	13.54481472	7.1403360534804	10.3642982	8.766988
ENSG00000258441.1	LINC00641	1.19962231802151	0.422518396693745	0.00452240875104894	0.162333043601856	11.86989	22.0394	20.02054	6.54176	4.20005	10.28688	6.16464	4.02727	8.46764
ENSG00000179094.15	PER1	1.42590356696075	0.502175800407029	0.00451912384118838	0.162333043601856	146.311948	65.5968383	299.740341	68.1177889	19.241811	101.432327	35.0350035	49.735552	49.670581
ENSG00000253414.2	AC124067.2	-2.03867673097794	0.717437887813942	0.00448867458363579	0.162333043601856	0.161904	0.470725	0	0.126237	0.255312	0.640625	3.12923	0.846563	1.47292
ENSG00000197584.11	KCNMB2	1.32992442229394	0.468444567129078	0.00452520397747809	0.162333043601856	1.9053384	0.9657079	0.969124	1.541011	0.257701	1.12519201071	0.218845	0.5735802	0.492218
ENSG00000257138.1	TAS2R38	-2.34142653140311	0.823671399740176	0.00447372709688638	0.162333043601856	0	0	0	0	1.26133	0	0.665645	0.0926423	0.19364
ENSG00000204386.10	NEU1	-0.968252431692578	0.340977445308327	0.00451647878150462	0.162333043601856	21.794921	18.099781	17.696417	12.72798	35.21455	19.560583	33.259148	53.01793	41.306991
ENSG00000188610.12	FAM72B	-1.35352552659097	0.477022336161699	0.00454759170523232	0.162887097704512	0.538344	0.962278	0.641059	1.367523	2.35669000309727	1.4509750255853	2.00293	3.709488	3.918832
ENSG00000181104.6	F2R	-1.07178323202634	0.378095252465094	0.00458700202987328	0.163619943413223	10.051086	4.708003	7.844388	9.02742	9.109885	11.7773	21.79376	31.114977	19.690063
ENSG00000130208.9	APOC1	-2.14830806205887	0.757899928154782	0.00458897415992074	0.163619943413223	6.07259	2.169979	1.989353	54.399449	41.032818	28.332185	115.792596	443.145069	245.49594
ENSG00000135205.14	CCDC146	1.63676818040088	0.577252516285148	0.004576178979018	0.163619943413223	67.848548	19.092164	55.566299	4.383853	6.368697	10.0692414	6.07829	7.319375	17.760816
ENSG00000163273.3	NPPC	2.0763868874075	0.73289498362055	0.00460946117866156	0.164101014738359	8.518938	0.571143	2.45535	0.184279	0.1319608	0.975635	0.17027	0.102672	0.609104
ENSG00000198848.12	CES1	1.94913149323319	0.688368779333684	0.00463270148300789	0.164258209008629	83.155423	102.33743	143.264391	2.1147157	4.779516	20.947496	20.604005	4.141901	26.3006674
ENSG00000108963.17	DPH1	0.962946376784222	0.34003024959147	0.00462660563678558	0.164258209008629	95.964405	64.379982	51.61883	25.7696364	28.2387004	41.119572	28.114771	26.464295	26.589869
ENSG00000126231.13	PROZ	-2.27038293110164	0.801866753316266	0.00463488062587753	0.164258209008629	0.156071	0	0.0395488	0	0.646489	0.0769189	0.449512	0.0678042	2.379361
ENSG00000163689.20	C3orf67	-1.65464155322918	0.584589460169161	0.00464849830083793	0.164492335800843	0.2220095	0.3410904	0.1491221	0.2596156	0.4081101	0.2041442	2.5120172	1.1187573	1.1579762
ENSG00000180061.9	TMEM150B	-2.00544123776257	0.708827790651705	0.00466592501102218	0.164860341390951	1.519798	0.0487402	0.350145	2.424143	8.722104	1.73065	16.01124	8.308614	3.106135
ENSG00000211896.7	IGHG1	-2.29120801040523	0.810039091665368	0.0046764457389966	0.164983599221954	545.49765	17.2304518	19.463658	1070.845905	395.171278	76.714714	20293.55467	21531.61761	4030.569741
ENSG00000271855.1	AC073195.1	-1.40112554227647	0.495748770485349	0.00470918703058472	0.165145346673465	0.519514	0.143604	0.301178	0.521035	1.17085	0.585831	1.57052	1.2908	1.14644
ENSG00000166292.11	TMEM100	2.00722753214964	0.710118856381364	0.00470438997688532	0.165145346673465	85.119754	65.697171	96.179196	7.1457434	3.843358	28.986579	1.28654852	1.670408	16.548087
ENSG00000065559.14	MAP2K4	0.730648851127656	0.258438477177377	0.00469617636502895	0.165145346673465	11.7088210045027	16.533998	13.187644	8.705677369744	6.642223	10.242331	8.52187000110873	6.7843009	7.6040580363418
ENSG00000137766.17	UNC13C	2.20336224438436	0.779380532542404	0.00469762607675573	0.165145346673465	0.3066663	0.575781	1.382913	0.0531165	0	0.1676248	0.00534167	0.0193571	0.1237317
ENSG00000247134.6	AC090204.1	-1.3889240724182	0.491592003728198	0.00472276146789867	0.165374189251299	0.68683	0.271636	0.597629	0.459155	1.70244	1.138632	1.307339	2.463431	0.867381
ENSG00000162849.15	KIF26B	-1.66949682133566	0.591421089983554	0.00475978824908957	0.166422342938734	0.5234484	0.3252306	0.486962	0.3912752	0.408833	0.724275	6.179905	0.9608009	1.31612
ENSG00000184916.8	JAG2	-1.32733082009456	0.470407981557732	0.00477759777604559	0.166548620243396	7.1697861	5.302265	6.940583	9.532471	11.051509	49.0168	27.91284	16.622562	7.9310928
ENSG00000148408.12	CACNA1B	2.17187412871474	0.769638932118363	0.00477342538067726	0.166548620243396	0.39976673	0.16674130327206	0.7064044	0	0.029386700300511	0.0576446744539	0.0207666	0.004620034954147	0.053146413110994
ENSG00000284669.1	AC092053.3	1.8750443981122	0.664709843763289	0.00478971241298965	0.166723209081825	1.26301	1.32169	2.65446	0.123192	0.0498323	0.383535	0.52461	0.420369	0.0573358
ENSG00000136231.13	IGF2BP3	-1.90527092409459	0.676006013975773	0.00482601789294268	0.167489949388059	0.25368584724	0.2719872	0.507145353	0.21791141498	1.2340212	1.4118013	1.0580584	5.243363	0.1300305
ENSG00000165752.16	STK32C	-0.979003312129695	0.347318524882487	0.00482113885841545	0.167489949388059	8.507357	4.381782	5.898051346	5.7110760696199	16.713186	10.387723	16.670432	8.865112	10.589724
ENSG00000163710.8	PCOLCE2	2.15913357059363	0.766484815122913	0.00484851901058325	0.167527399863466	13.63007	34.630266	5.580418	0.855709	0.0516796	5.7815	0.739138	0.4284839	1.7361494
ENSG00000115523.16	GNLY	-1.39746903758801	0.496054966974398	0.00484495229124127	0.167527399863466	6.3796991	1.9881827	5.46549	9.604161	23.398507	16.484741	12.920412	27.46695	9.774607
ENSG00000114270.17	COL7A1	-1.59135867831914	0.564763739296294	0.00483626085461279	0.167527399863466	12.635578	7.558639	14.085307	16.090105	8.7108495	34.617257	128.222267	68.964225	20.29572
ENSG00000160307.9	S100B	1.94303750779591	0.689927142616219	0.00485812230718707	0.167612363895465	30.294593	28.713946	70.38322	7.271164	0.351255	19.761234	2.844021	3.09792	6.753995
ENSG00000258653.3	AC005520.1	1.39852148191458	0.496681357172841	0.00486662781683893	0.167659258753096	0.545524	0.722062	0.850018	0.166708	0.128293	0.342732	0.0981098	0.282148	0.17954
ENSG00000224940.8	PRRT4	2.1114292551976	0.750495105858709	0.00490234089001087	0.168641964252999	6.068002	4.429048	3.501682	0.0829424	0.0249547	1.4335886	0.2304974	0.1738732	0.543596
ENSG00000100796.17	PPP4R3A	0.374644167665422	0.133231951262037	0.00492391901200777	0.169136257599874	53.866438	38.755123	44.600068	42.4952555	25.7288441	42.030535	40.203927	38.0618244	38.3620053
ENSG00000230873.8	STMND1	-2.31501972652666	0.823575806725616	0.00493974535866488	0.169317613552734	0	0	0	0	0.318047	0.0441566	0.0661883	0.815851	0.0406831
ENSG00000253490.5	LINC02099	-2.25359709825652	0.801796704530573	0.00494363263644443	0.169317613552734	0	0	0	0.0467523	0.0427947	0.0356166	0.2452686	0.853848	0.1243019
ENSG00000162407.8	PLPP3	1.28864603928603	0.458802172195151	0.00497391539278053	0.16972207415544	43.437128	120.761874	39.611705	25.0426862	19.5610946	34.4602956	22.277973	20.895889	19.974442
ENSG00000173991.5	TCAP	-1.86665898890719	0.664865340446127	0.00499161293922909	0.16972207415544	1.0495325	0.635174	0.979798	0.407827	5.27901	1.05577	12.0848	0.7996961	0.954128
ENSG00000128016.5	ZFP36	1.67121313212228	0.595078670025982	0.00497898509377297	0.16972207415544	801.43756432	661.1235365449	1886.1581602419	115.070756944	177.4224796	184.227781	319.432653	391.6062358	66.2959364
ENSG00000213509.4	PPIAP16	1.93626504907942	0.689346938526726	0.00497203963473934	0.16972207415544	2.62148	1.18584	3.1996	0.545072	0.13781	0.864692	0.67606	0.152346	0
ENSG00000166483.10	WEE1	1.11088485631085	0.395663499140856	0.004990434129448	0.16972207415544	38.43655	48.9661240488574	30.818398	14.891781	8.361972	27.797722	13.307791	13.314651	16.083238
ENSG00000145365.10	TIFA	1.34010872532129	0.477988138721666	0.00505286142218387	0.171542879926116	4.3269	18.11756	8.78285	7.57735	1.950478	3.39966	4.84559	6.83724	2.70994
ENSG00000171621.13	SPSB1	1.88243512191846	0.67167908037855	0.00506954625212648	0.171542879926116	19.397	206.4535	36.78435	6.13735	6.32876	14.767	21.6858	14.2886	16.7529
ENSG00000261360.1	AC010491.1	-1.37844432576522	0.49181640182001	0.005066704281893	0.171542879926116	0.11611100380534	0.1483214	0.0784208	0.286896	0.452351	0.324085	0.909365	0.436957	0.492011
ENSG00000115226.9	FNDC4	1.50671659609531	0.537676833126973	0.00507441109367565	0.171542879926116	17.92851	52.98666	17.01777	5.222791	4.463867	12.822038	9.200961	6.17938	6.643774
ENSG00000154920.14	EME1	-1.71655016062507	0.61314560939003	0.00511691418472264	0.171838126290696	0.900713	0.3508264	0.325445335172	2.78187100639796	6.06251400666155	2.1405615	5.096874	4.743543013	6.814899
ENSG00000117724.12	CENPF	-1.90425748504532	0.68016486120895	0.00511501371791215	0.171838126290696	1.034937	0.182138	0.933795	6.09899	9.661038	5.431889	21.9869323	10.463911	18.030428
ENSG00000229637.3	PRAC2	-2.30474422112302	0.823435126917924	0.00512709127503034	0.171838126290696	0	0	0	0	3.12386	0.163308	0.957329	0	4.38499
ENSG00000269959.1	SPACA6P-AS	1.99978368206775	0.714151921627266	0.00510675261409378	0.171838126290696	0.227105	0.4775	0.040596	0.0208482	0.0105416	0.0394742	0.0256144	0.0347999	0.048518
ENSG00000256229.7	ZNF486	-0.996729087563563	0.35588319662456	0.00509887828324273	0.171838126290696	1.494591	0.950471	1.529748	0.877059	2.185003	1.809683	2.637294	4.61014	1.788124
ENSG00000146648.17	EGFR	1.30901728206041	0.467675786635345	0.00512635967355285	0.171838126290696	15.611636	26.3975007	15.267636	4.451878	3.4099537	10.1866976	5.9519835	4.0473315	7.1152185
ENSG00000158747.14	NBL1	0.62868966558182	0.224679986504111	0.00513952738258774	0.172009203884295	232.955346	252.765573	198.16332	165.1589676	130.973859	143.794822	194.831918	131.269307	121.158097
ENSG00000131747.14	TOP2A	-1.95026024935325	0.697380444137066	0.00516511962323648	0.172619475043805	5.842083	2.026203	3.24305	25.324157	110.94875	8.408778	40.7472	50.62433	72.20558
ENSG00000149968.11	MMP3	-2.1685591213177	0.776240078793957	0.00521135253986352	0.173916844861647	1.879743	1.89882	0.466582	1.53308	6.15773	0.272688	12.21063	62.9532	0.603147
ENSG00000135723.13	FHOD1	-0.804750217167125	0.288202556477526	0.00523335642120665	0.174403089485695	23.5507	12.301226	16.097311	20.584469	29.398944	34.5694753	49.6879198	36.125117	22.24696
ENSG00000254343.2	AC091563.1	1.23722783225422	0.443385327130151	0.00526409732963157	0.175023532926634	16.0428	4.47755	8.56055	4.78576	2.81364	2.975289	3.77714	1.7415	5.2082
ENSG00000067715.13	SYT1	1.60114386206208	0.573931541319102	0.00527435479217128	0.175023532926634	6.08563	2.115501	6.271607	0.4102184	0.334096	1.549229	1.2486184	1.321432	0.8422943
ENSG00000170537.12	TMC7	-1.88237941259807	0.674726040711589	0.00527336807448264	0.175023532926634	0.779015	0.465757	0.375236	2.266591	13.518332	2.287066	4.649514	4.437282	1.1404555
ENSG00000164038.14	SLC9B2	1.37718180984549	0.493738700429029	0.00528232821356947	0.175040539856714	7.919506	33.742433	15.280583	6.526169	3.530843	9.130987	5.5218155	7.443717	4.948664
ENSG00000254290.1	AC124067.4	-2.13766774499373	0.766766437589204	0.005305100355045	0.175189149370657	0.138383	0	0.0233682	0	0.272982	0.4993752	0.862797	0.0400635	0.209435
ENSG00000213420.7	GPC2	-1.27120684398919	0.45601406782334	0.00530921466273975	0.175189149370657	1.173288	0.374819	0.5852171	0.644445	1.065729	1.1857078	4.196522	1.3789032	1.7593532
ENSG00000197903.7	HIST1H2BK	-1.43618446825825	0.515125164182446	0.00530296147684614	0.175189149370657	23.0726	13.3562	14.1103	20.3452	63.8186	24.482	63.5704	113.667	17.8359
ENSG00000257743.8	MGAM2	-2.29257062819211	0.823053802410021	0.00534544017505367	0.175912882683033	0.01402257	0	0	0.209716	6.2274588	0.03560878	4.9889338	2.2558556	0.166634
ENSG00000171812.12	COL8A2	1.9489890028555	0.699715583039456	0.00534614404130269	0.175912882683033	40.31702	54.6225498	22.46215	1.163453	0.336164	5.256373	8.41704	6.195761	7.520903
ENSG00000266964.5	FXYD1	1.80022929825777	0.646485731719168	0.00535873685624899	0.176080287653302	210.815273	336.766432	216.893856	39.839545	11.348135	147.4264897	15.989152	21.5836947	42.27033
ENSG00000176358.15	TAC4	-2.13176333247979	0.766009138340815	0.00538674967897273	0.176260159300389	0.137966	0	0.140197	0.107582	0.32636	0.351118	2.935999	0.240319	0.501881
ENSG00000180739.13	S1PR5	-1.04906161915272	0.376865639865452	0.00537511862207272	0.176260159300389	0.436128	0.2269817	0.374001	0.549687	0.823189	0.826573	0.9015572	1.2824051	0.792166
ENSG00000136717.14	BIN1	1.09349335982031	0.39289338550001	0.00538287865152161	0.176260159300389	77.8800873	112.867058	82.245957	24.893375	24.944959	35.9544920920062	38.13755302	31.2728401	44.6092878
ENSG00000205869.2	KRTAP5-1	-1.66393620706675	0.598009216152224	0.00539486586212644	0.176279871854246	1.01577	0.131011	0.343454	0.211303	1.06838	0.601237	3.71153	2.11968	0.922912
ENSG00000249992.1	TMEM158	-1.55465106496095	0.559075828617224	0.00542331987161583	0.176472271162246	1.46436	4.81798	1.48399	3.08733	2.90085	19.1284	17.8497	12.2339	3.933
ENSG00000162747.10	FCGR3B	-2.17111557805369	0.780693554926694	0.00541902828073227	0.176472271162246	1.345563261901	1.185103561	0.4319480056369	0.46376	1.04102529426863	0.5676391	44.5304810018488	6.68358600058776	0.201978082316
ENSG00000109756.9	RAPGEF2	0.656345721067282	0.2359904753435	0.00541519905245392	0.176472271162246	13.467459	14.4624747	16.265128	8.08128	5.592917	10.64842	10.794528	9.134063	7.803315
ENSG00000174827.13	PDZK1	-1.41893285653146	0.510538542571152	0.00544784598520129	0.176589639971598	0.33026681	0.39599	0.329528	0.45305	2.00209400031887	0.429508	0.937028000240226	1.3093286	1.220137
ENSG00000267580.1	AC008738.3	-1.73496953905493	0.624372967636511	0.00545703460975273	0.176589639971598	2.13832	2.46881	1.59335	10.007	23.2753	4.972	28.2963	29.9202	11.6289
ENSG00000155761.13	SPAG17	-2.08276946652361	0.749409718883218	0.00544907293006305	0.176589639971598	0.3464503	0.0961402	0.1579942	0.0774319	1.20781015	0	0.8285565	0.7539928	3.682633
ENSG00000271216.1	LINC01050	-2.24275066937286	0.807049989178704	0.00545351054847714	0.176589639971598	0.179428	0.0868224	0	0	0	0.17712	1.90005	2.49743	0.815347
ENSG00000101938.14	CHRDL1	2.06115410116471	0.742028341636207	0.00547401480322237	0.176895125755372	42.6486080139	79.56074	30.879366	5.545798	0.0593143	13.739089	2.621839	11.48113	2.723198
ENSG00000186352.8	ANKRD37	1.303440742757	0.469360253243841	0.00548533549220654	0.17701713340118	27.753644	15.096836	6.062283	4.778532	4.218607	4.92992	3.909685	7.32445	4.586582
ENSG00000245848.2	CEBPA	-1.69409055523253	0.61084847486511	0.00554841043996669	0.178013043201213	1.91147	1.45214	2.29683	6.12571	16.4318	2.81061	26.9788	15.0433	5.48351
ENSG00000168275.14	COA6	-0.865528645353402	0.312126658949744	0.00555413441981534	0.178013043201213	29.79664	24.417112	18.525563	17.301759	45.371322	26.423517	52.05969	52.59075	40.01023
ENSG00000235374.2	SSR4P1	1.13094629778655	0.407816622963382	0.00555124957567006	0.178013043201213	2.804879	0.875294	1.562374	1.100287	0.320783	1.1619148	0.90585	0.491133	0.716923
ENSG00000172167.7	MTBP	-1.18078146835728	0.425806501111892	0.00555340881742601	0.178013043201213	0.7753994	0.3424057	1.1677288	1.0598727	1.70994	1.1746169	2.946436	2.2391358	2.6054888
ENSG00000120729.9	MYOT	1.94395457837665	0.700786109339998	0.00553780149853303	0.178013043201213	11.53307	13.229279	19.150159	1.0298296	0.36567884186	5.474884	0.46008521	0.6693711	3.261039
ENSG00000077044.10	DGKD	1.75632919629877	0.633510227463374	0.00556485422865027	0.178113294759023	25.4427046	300.1653	23.40931308	73.672659	32.2978185	22.167615	33.103845	26.3685465	19.16305183
ENSG00000146151.13	HMGCLL1	1.8645798372637	0.672697176370304	0.00557478357031531	0.17818800727952	1.393797	0.8028886	1.4888896	0.4642906	0.12691682651208	0.5934004	0	0.0777701242598	0.2585239
ENSG00000125355.15	TMEM255A	1.51191118759811	0.545754103975531	0.00560019752876749	0.178756781254985	3.380364	2.21123	3.407209	0.6015731478672	0.118421	1.33056062689	0.689611	0.93426	0.791092
ENSG00000124942.13	AHNAK	1.2850796663897	0.464124798435094	0.00562590967413524	0.179333514762075	179.403066	198.20998	227.048438	84.85553	40.315649	156.27053	36.582516	41.368056	72.46147
ENSG00000071539.13	TRIP13	-1.7085739134221	0.61722786274421	0.00563770140990107	0.179465553294015	0.927141	0.830764	0.495027	4.010773	4.801742	2.393882	14.247882	7.319743	9.351231
ENSG00000233542.1	AL391845.2	-1.87262685848251	0.676685655990993	0.00565138386563047	0.179657339934358	0.114608	0	0	0.0894232	0.248684	0.0847005	0.384885	0.447999	0.338256
ENSG00000135914.5	HTR2B	2.06647480105337	0.746979155915902	0.00566715971955048	0.179915066549897	28.7241	1.98797	7.05416	0.271834	0.0969082	1.46548	0.515744	1.45076	2.5587
ENSG00000119711.12	ALDH6A1	0.897520422190125	0.324494326217827	0.0056765099555984	0.179968378470668	7.9936430288	8.171908	10.0609351	7.082456	4.92937	6.527374	3.4073214	2.9897789	4.81374
ENSG00000236581.8	STARD13-AS	1.71783499015073	0.622423620074847	0.00578167705336852	0.180628127079229	0.8376662	3.7789619	1.70675486	0.330501	0.2770947	0.413706	0.4376552	0.4121179	0.4406711
ENSG00000088882.7	CPXM1	-1.86029664010382	0.674361476416665	0.00580487324351361	0.180628127079229	5.98671	2.2829	0.604243	2.63093	0.83256	31.4574	32.3865	13.4473	5.87371
ENSG00000136108.14	CKAP2	-1.40376127028642	0.508462349159599	0.00576605241350395	0.180628127079229	5.136956	1.0862163	3.112936	3.681752	7.375922	3.440758	20.931332	8.157885	10.961178
ENSG00000183569.17	SERHL2	1.13581181152282	0.41145464962693	0.0057716714966834	0.180628127079229	6.3930041	2.794762	4.9240072	3.531058	1.422999	2.9208002877	1.8167794	0.7835492	2.916232
ENSG00000203812.2	HIST2H2AA3	-1.42553522659886	0.516617329928943	0.00579139993764801	0.180628127079229	19.2139	30.5782	22.5415	13.313	57.3462	25.7926	81.1615	154.327	28.5829
ENSG00000112164.5	GLP1R	1.9181484945125	0.694878982101884	0.00577294711275147	0.180628127079229	2.45661	0.0668569	1.1567	0.256481	0.0819069	0.136333	0.0497669	0.135211	0.424128
ENSG00000166984.11	TCP10L2	-2.27444715608599	0.823175015454762	0.00572696568502072	0.180628127079229	0	0	0	0.0197546	0.0815172	0.5179846	1.665543	0	0.187912
ENSG00000196503.4	ARL9	-1.3023028955799	0.472148908595884	0.00581124258887306	0.180628127079229	0.991449	0.64483	0.772593	0.3649722	1.886294	1.867272	0.747715	1.4659704	3.342217
ENSG00000235272.2	RAMACL	-1.74150588862832	0.630595164306415	0.00575037377649452	0.180628127079229	0.0496008	0.0477595	0.0511068	0.0381506	0.195665	0.257264	0.192503	0.353305	0.0453044
ENSG00000116586.11	LAMTOR2	-0.644235442057471	0.233559290297533	0.00580961109783756	0.180628127079229	71.092135	44.010548	56.398688	51.663619	92.264057	78.165003	90.7352	89.79691	103.00199
ENSG00000273597.1	AL355377.1	2.14681279255365	0.777891211354698	0.00578393452423072	0.180628127079229	0.505572	1.40185	1.28488	0	0	0.115539	0.0512136	0.105744	0.182564
ENSG00000224728.1	IMPDH1P8	-1.70275353826809	0.616152538371865	0.00571805427198229	0.180628127079229	0.151713	0.0733272	0.11533	0	0.329183	0.149537	0.364111	0.494318	0.310029
ENSG00000171094.17	ALK	2.12833177321981	0.771649634598538	0.00581280576040313	0.180628127079229	0.774651	0.35687325	1.6682451	0.1007354	0	0.2560965	0	0.1440494	0.05918517
ENSG00000143476.17	DTL	-1.70516475937859	0.618213279181762	0.00581180684359269	0.180628127079229	0.56482	0.1581422	0.3886625	1.9661988	4.37381000889078	1.48968743	5.5378390128161	3.0727447403495	3.315516981
ENSG00000279347.1	AC021945.1	-1.31824275637365	0.477748579515725	0.00579286337307868	0.180628127079229	0.103976	0.134001	0.281012	0.135209	0.273465	0.478219	0.632061	0.331224	0.661015
ENSG00000075618.17	FSCN1	-1.18926262467315	0.431337793504591	0.0058307751234276	0.180946845463935	28.170031	8.15975	10.443862	9.02517	14.92718	30.942239	57.905481	51.4547	23.02438
ENSG00000147689.16	FAM83A	-2.10191824691644	0.763194805746665	0.00588529738500781	0.181537992965765	0	0.0138679	0.1232339	0.1706539	0.640095	0.1058361	0.311057	2.386476	0.4010876
ENSG00000143882.11	ATP6V1C2	-1.15130351517326	0.418049284135656	0.00588735811209098	0.181537992965765	2.1489094	2.6916373	1.32353	2.280761	3.2142128	2.84502206214	10.647958	6.064306	4.8638543
ENSG00000272217.1	AL645940.1	-1.69376628728632	0.614758385063842	0.00586609390854651	0.181537992965765	0.382428	0.246915	0.647512	0.397631	1.60832	0.377924	2.21337	3.66281	0.927286
ENSG00000117983.17	MUC5B	-2.26893287174215	0.823691207128688	0.00587654395245845	0.181537992965765	0.2256197	0.1861418	0.0725888	1.646825	112.1271938	0.0324966	0.3852708	60.090717	0.174684
ENSG00000135476.11	ESPL1	-1.26474922883382	0.459253213324374	0.00588851339017719	0.181537992965765	0.9333885	0.7492819317835	1.38297048037	2.447004896	3.522995	2.219845311	4.828438263952	5.91521100172678	3.301807
ENSG00000182919.14	C11orf54	0.738060895724298	0.268094628009509	0.00590543286151476	0.181594264392404	21.8556473	12.7707078	26.9842282407494	11.3471330011667	9.359675	13.093831	13.101527745081	11.282316	9.070399
ENSG00000279286.2	AL133373.2	-2.09467670172555	0.761235532956394	0.00592903996098127	0.181594264392404	0.0288164	0.0739071	0.0387476	0.292291	2.88763	0.056791	0.53184	0.550696	0.654224
ENSG00000090776.5	EFNB1	-1.19401696409906	0.433850670705548	0.00592075455653739	0.181594264392404	14.5735	7.60889	6.35976	16.0939	40.2045	24.2276	32.2801	28.7583	16.0608
ENSG00000198556.13	ZNF789	-0.745413986161869	0.270850988697631	0.00592111113185376	0.181594264392404	13.753877	7.662456	12.4458000025321	13.013612	22.179049	18.785993	24.117258	19.0306421	19.7723243
ENSG00000243449.6	C4orf48	-1.27289392572514	0.462575309703554	0.00592768481033215	0.181594264392404	14.0622	4.78136	11.8826	16.98755	25.31045	17.09538	63.11997	41.42803	23.019
ENSG00000239605.10	STPG4	-2.02112929491452	0.735471674382646	0.00599467987794991	0.182177700280548	0.1928698	0.07037086	0.278196	0.170163	3.0299328	0.045129	1.963508	1.05672	0.22599801
ENSG00000144355.14	DLX1	1.785468428043	0.649661192088182	0.00599038830963659	0.182177700280548	1.076967	0.4559234	0.843981	0.0462131	0.0233669	0.1969146	0.1299825	0.1950337	0.141878
ENSG00000205362.11	MT1A	1.95363276359943	0.71057916623755	0.00597130911181469	0.182177700280548	4.79684	66.6947	54.5673	4.926	5.78596	16.779	2.20707	2.20542	2.53271
ENSG00000267452.2	LINC02073	-2.24364498710729	0.816125274032027	0.00597513338476618	0.182177700280548	0.0190006	0	0	0	0.0462049	0.0794667	0.127549	0.376655	0
ENSG00000162706.12	CADM3	1.89511482666273	0.689461574032966	0.00598342917216952	0.182177700280548	10.543037	19.1471	13.87556	2.172732	0.327955	7.431545	0.807664	0.5272823	2.587228
ENSG00000270977.1	AC015849.5	-2.09100409269657	0.760748001669207	0.00598474628401399	0.182177700280548	0	0	0.00965345	0.0223116	0.2450012	0.0281597	0.0274061	0.0827519	0.0865338
ENSG00000279255.1	Z97653.2	1.42892148257509	0.520148677926593	0.00601173808221498	0.182435807589802	0.742681	0.438764	0.376416	0.321915	0.130216	0.284706	0.198085	0.0358524	0.187376
ENSG00000164620.8	RELL2	-1.42578690473984	0.519119835396213	0.00602262990848564	0.182435807589802	1.3629755	0.313214	1.4394217	2.082729	3.7812795	1.88311500724359	5.433337	6.635747	3.431914
ENSG00000099625.13	CBARP	2.03524435053072	0.741076247593439	0.00602650146550005	0.182435807589802	19.7585273444	15.4251607	1.1474752	0.140621126	0.2704383	1.566189	1.1743992	2.7975619	0.949013
ENSG00000165474.6	GJB2	-1.98315247716778	0.722474838540783	0.00605213507785427	0.182975697244251	1.34658	1.5568	1.576249	7.37356	18.04158	1.6840563	79.84952	9.273061	7.467761
ENSG00000172977.12	KAT5	0.682602356168151	0.248983857274444	0.00611495580025422	0.184163001321905	52.605594	58.38951075802	62.089961	34.259524	25.1006956	47.04911752	34.555856	27.536636657184	35.458701
ENSG00000237596.6	AL138828.1	1.42641394354548	0.520156989881326	0.00610150803667852	0.184163001321905	0.989214	0.5400987	0.706281	0.1993206	0.1823233	0.289241	0.176064	0.3631943	0.0876157
ENSG00000162413.16	KLHL21	1.40363507888665	0.51191224538854	0.00610766193414821	0.184163001321905	60.06595	72.677	36.516609	8.38018	9.21459	18.10994	10.559022	15.20774	24.433589
ENSG00000146143.17	PRIM2	-0.944510196716374	0.344664018763079	0.00613682882187986	0.184436148493855	3.5530133	1.98121	3.770003	3.8138355	4.2194298	4.6993349	8.493541	7.5024564	9.9389471
ENSG00000132122.11	SPATA6	0.782960411224611	0.285728703964171	0.00613974817670607	0.184436148493855	5.374771	4.2668963	6.3305563	5.04968500442795	2.4441648	4.6828041	2.167966149411	3.0335517	3.603999
ENSG00000057149.15	SERPINB3	2.20771287895946	0.805966264257937	0.0061586549749647	0.184617482461844	0	0.123201	1.22508	0.0584789	0.0251446	0.0738757	0	0.0276845	0.0340364
ENSG00000196636.7	SDHAF3	-0.727655391440779	0.265658851991927	0.00616152290045709	0.184617482461844	10.0352700170671	7.444687	9.91323	8.94819	15.70553	10.96467	19.65364	18.25079	15.25473
ENSG00000279489.1	AL355377.2	1.87464359122846	0.684606845364124	0.00617619176809812	0.184820963101212	0.790048	1.72455	2.30996	0.151688	0.025566	0.466546	0.231894	0.0979852	0.491989
ENSG00000189143.9	CLDN4	-2.18600157019803	0.798604979808347	0.00619504526942426	0.184913431381632	0.4975530425342	0.20845810391947	0.90553900653436	26.25620342154	181.139881	9.5951870315935	226.7298389856	44.43703355421	64.593645556295
ENSG00000235173.6	HGH1	-1.10257828057799	0.402795878066884	0.00619433784122753	0.184913431381632	9.381433	5.052529	5.53537012245	10.569489	11.421943	11.603788	31.149785	27.01609212	13.64223
ENSG00000168843.13	FSTL5	2.21630510364258	0.809949627044404	0.00621250408663929	0.185198930592941	0.4852580126543	0.117187000905987	0.6641199	0	0	0.0534411	0	0.019151500441523	0.040052700131383
ENSG00000091704.9	CPA1	2.07423410505381	0.758342562352955	0.00623385062986888	0.185478355005907	0.623799	1.1079314	0.9798088	0.15233	0	0.0449182	0	0.1013339	0.359639
ENSG00000138315.12	OIT3	-1.83907601771426	0.672418282876928	0.00623768902006139	0.185478355005907	0.46602119	0.0346482	0.141116	0.1398371	0.384646	0.503146	2.71648	1.53226	0.1627751
ENSG00000107263.18	RAPGEF1	0.471332852545634	0.17243034655163	0.00626711929399197	0.185701860574537	31.188605	31.737461	34.274299	24.5501259	16.255389	25.96784	25.46136	28.6359183	20.839875
ENSG00000172020.12	GAP43	2.08958593300331	0.764555909779723	0.00627467179735817	0.185701860574537	21.250656	5.265843	13.919936	0.0788953	0.0466239	1.52804	0.970497	0.468521	3.09171
ENSG00000259422.1	AC091100.1	2.20169922616914	0.805574260728155	0.006274501312193	0.185701860574537	0.186653	0.13527	0	0.200253	0	0.0229871	0	0.0405288	0
ENSG00000127530.3	OR7C1	-2.01081290983241	0.735764764075035	0.00627686694666073	0.185701860574537	0.00453462	0.01340967	0	0.0108386	0.05073249	0.01367116	0.1004812	0.036258	0.05842163
ENSG00000283294.1	AP005212.4	-1.73782642093286	0.636054567609651	0.00629134985711415	0.185895918133193	0.328003	0.110866	0.0444403	0.462636	0.982557	0.282199	0.956596	2.48627	0.95088
ENSG00000272414.5	FAM47E-STBD1	1.50469345800978	0.551090601797367	0.00632590258835684	0.186681761793006	16.103983	38.292867	15.273586	5.824376	2.77843	10.694488	2.84902	4.7299	9.949335
ENSG00000069482.6	GAL	1.97894931603566	0.725448846502844	0.00637396178587368	0.187077966945078	31.3812	8.5743	42.1547	0.82439	0.256499	4.73375	5.16309	0.777811	5.8365
ENSG00000144191.11	CNGA3	1.91168120079931	0.700965031683011	0.00638717239346182	0.187077966945078	3.632722	1.804521	2.283081	0.275824	0.0363826	1.1109021	0.132622	0.0903662	0.488417
ENSG00000213694.4	S1PR3	1.99121610034218	0.730002981764028	0.00637810335518507	0.187077966945078	43.4618172	175.19666182	37.29590947	3.4322819446263	0.651511410596702	22.1753991	6.2402326361822	8.3118142	18.597897
ENSG00000145779.7	TNFAIP8	1.02576130217393	0.376083288241319	0.00638192749913265	0.187077966945078	47.742609	28.56597	21.269629	20.13625	6.640943	14.01132	11.1257777	24.11278	17.010857
ENSG00000171533.11	MAP6	1.70446127874714	0.624835002917644	0.00637470068099951	0.187077966945078	30.430832	22.525908	27.492702	2.96647	1.129541	10.36864	2.297702	2.705422	9.57976
ENSG00000186074.18	CD300LF	-1.46926209399276	0.538726793181331	0.00638576448391022	0.187077966945078	1.680007	0.717552	0.586155	1.438089	2.702937132615	1.243085602568	3.024234	8.940101	2.806163
ENSG00000118804.8	STBD1	1.40101265405136	0.513928086403707	0.00640901109039416	0.187364093578491	9.29747	18.3146	6.76202	4.29254	1.9034	5.97668	1.67696	2.42899	5.5694
ENSG00000008056.13	SYN1	1.35405768195864	0.496834757875591	0.00642298020538933	0.187364093578491	4.59373	3.335199	3.729742	0.746514	0.377457	1.039476	2.304115	1.0825316	1.043871
ENSG00000007038.10	PRSS21	-2.20169353004757	0.807941703944633	0.00642888603770876	0.187364093578491	0.164998	0.101522	0	1.2954772	5.222236	0.503066916	3.321508	0.365091628	24.554207
ENSG00000224853.2	LINC00393	-2.244775038192	0.823575813569947	0.00641760425825581	0.187364093578491	0	0	0	0	0.1384272	0	0.0742829	0.4251027	0.948362
ENSG00000211892.4	IGHG4	-2.17102007709602	0.79683417576833	0.00643878284178311	0.187397952733914	9.917579	0.7371885	1.502382	61.54275	18.662718	13.820728	766.145168	271.944136	377.727059
ENSG00000167550.10	RHEBL1	-1.15692410872819	0.424686196938339	0.00644602309604316	0.187397952733914	0.746347	0.494117	0.655818	0.728668	0.588842	1.569917	2.07094	2.876591	1.4463000273693
ENSG00000011083.8	SLC6A7	-2.23313807520902	0.820010601723641	0.00646325721554284	0.187666432591399	0.0426027	0	0.014385	0.132971	4.2951296	0.0361808	1.04834	0.197298	0.0128939
ENSG00000137944.17	KYAT3	0.870344943919927	0.319717291806665	0.00648424184018208	0.18804301336528	18.405695	35.00876	27.438961	20.65484	9.439962	21.2035197012	14.029033	12.628666	16.73501
ENSG00000095752.6	IL11	-2.02639940296176	0.744552477692811	0.00649600258355214	0.188151501991008	2.212797	0.863612	0.373526	0.660663	0.684881	0.581756	22.11887	17.08834	1.101285
ENSG00000269964.3	MEI4	2.05033826052087	0.753833051095759	0.00653048717853205	0.188917089636918	0.158042	0.0477064	0.180082	0	0.01661314	0.00972796	0.0094677	0.00857615	0.0179361
ENSG00000105771.13	SMG9	-1.09925815142299	0.404619752930857	0.00659227234275975	0.189990275378271	20.4587149	12.927178	15.6204856	19.521693	51.0501047	21.634155	40.501386	60.661936	25.232186
ENSG00000166272.17	WBP1L	0.85925683510469	0.316226917140005	0.00658336301022717	0.189990275378271	43.852145	50.622095	46.025654	19.0023823	13.93225	30.520136	26.380486	18.664315	24.892826
ENSG00000214160.9	ALG3	-0.956448433590222	0.352021945873069	0.00658738899758228	0.189990275378271	17.913594	21.6629784	17.264301	22.6947757	47.860103	26.785407	39.955689	59.055624	36.842494
ENSG00000129195.15	PIMREG	-1.4445766307509	0.531801781390446	0.00659997759828186	0.189990275378271	1.3473962	0.381627	0.562973	1.660202	3.065985	1.305335	5.455986	2.175181	4.42096
ENSG00000138411.12	HECW2	-1.4228357757579	0.523958033689343	0.00661651981609657	0.190233053192943	0.4798376	0.8301939	1.4892424	1.393797	1.8536906	3.5251527	6.5738912	5.362568	0.96071579
ENSG00000138755.5	CXCL9	-2.01905254072547	0.743922807219608	0.00664637477717427	0.19085752588407	9.41815	0.764689	1.76399	6.71579	3.43477	3.23565	44.7819	122.517	13.0615
ENSG00000138316.10	ADAMTS14	-1.51631166898797	0.558850047378612	0.00666225827222628	0.191079757120661	1.3706581974	1.17798	0.593426	3.33793	2.249006	5.350641605	13.44956	8.02864	3.21521
ENSG00000169762.16	TAPT1	0.601149392135303	0.221643662770725	0.00668314742096569	0.191444837171277	20.515423	16.4915261	20.9414217	13.1522501	8.785012	16.064562	10.2650203	15.213529	11.108664
ENSG00000117632.22	STMN1	-0.99991000275385	0.36874992709857	0.00669551227578315	0.191565138417254	48.758376	23.857044	37.437094	60.45222	75.282327	57.851012	134.252172	111.383141	97.739012
ENSG00000177432.7	NAP1L5	1.59969611908881	0.59015034220524	0.00671497195670154	0.19165444899778	23.1206	16.9071	16.3916	1.71481	1.22545	7.21902	1.79955	4.88741	5.37554
ENSG00000130226.16	DPP6	2.10099628296254	0.775014072998641	0.00670980835678197	0.19165444899778	14.4034006	12.0386806	24.311864	0.3715426	0.0663651	3.0393792	0.3879154	0.137542500275567	3.8999638
ENSG00000108018.15	SORCS1	1.94609120459536	0.719079987683044	0.00680247200072449	0.192354870080095	3.6332220278378	3.54253826377	7.297423	0.6203832	0.0610043	1.902403205497	0.26563869696	0.0730541	1.0306392
ENSG00000277224.2	HIST1H2BF	-2.14753086605392	0.793169614284515	0.00677858563611255	0.192354870080095	0.252279	0	0.102315	0.0393647	0.796155	0	1.0179	3.3767	0.320828
ENSG00000119138.4	KLF9	1.46141904105609	0.539895979809104	0.00679243309514058	0.192354870080095	38.5391	76.6202	105.316	14.9061	9.33466	38.5224	14.0305	11.2093	26.6073
ENSG00000155629.14	PIK3AP1	-1.50180362836371	0.554368294996163	0.00674790321540404	0.192354870080095	2.626911	1.610127	0.84048	3.7173537	8.882403	2.8598418	12.148476	12.208426	3.1924616
ENSG00000074317.10	SNCB	2.05491111586743	0.759194713460927	0.00679559633475635	0.192354870080095	0.99216	0.0469941	1.052921	0.0758369	0	0.0958393	0.1377702	0.164938	0.0385844
ENSG00000197324.8	LRP10	0.887834111474859	0.328020202247408	0.00679669742847284	0.192354870080095	114.653481	106.2560234	85.248875	44.8182097	36.5663891	68.4272	49.0466596	31.168757	56.36634
ENSG00000257512.1	AC124947.2	-1.95030879021596	0.720672587928457	0.00680510388161112	0.192354870080095	0.0538624	0	0	0.336176	0.934886	0.424919	1.08683	0.655455	0.489291
ENSG00000135824.12	RGS8	1.9602007437642	0.724261988704669	0.00680006339990335	0.192354870080095	0.0650762	0.170618	0.112991	0.0217627	0	0.0183112	0.0089105	0.00807155	0.0506428
ENSG00000072364.12	AFF4	0.672974197286392	0.248750007331506	0.00682172911070228	0.192592763737889	17.010685	23.058353	20.1954237	13.2331972	10.5691247	15.0678643	11.08644	13.325963	10.4909422
ENSG00000162931.11	TRIM17	-1.5700487844789	0.580557965676226	0.00684321827352505	0.192637154406188	0.428475	0.1269680549482	0.4218677919983	0.438584	0.3408724	1.4581927049	2.624150211	0.393001	2.244382522853
ENSG00000198901.13	PRC1	-1.45037190340976	0.536311862942238	0.00684393450778906	0.192637154406188	7.024907	3.868147617	4.839694	16.8083534	16.800652	10.324112	45.115333	37.918041	34.090697
ENSG00000105376.4	ICAM5	-1.730213338669	0.639836273544061	0.00684793430692473	0.192637154406188	0.1947124	0.202414	0.106121	0.1961505	0.132241	0.722336	0.180827	1.913364	1.323837
ENSG00000243364.7	EFNA4	-1.6652894355259	0.615927737926281	0.00685702881448259	0.19266197966057	3.02565	0.576519	1.48581	5.951718	15.05507	3.59941	22.63193	7.99522	10.54037
ENSG00000168356.11	SCN11A	1.84964482285837	0.684342815263527	0.00687571793870196	0.192844495772099	0.5963081	1.981275	0.2208504	0.0448437	0.1223144	0.303398	0.1371103	0.0917324	0.101397
ENSG00000230393.1	AC092667.1	1.64369032168354	0.608278044604537	0.00688818411222962	0.192844495772099	0.568702	0.325628	0.576175	0.164349	0.0498604	0.136728	0.0233955	0.054879	0.267766
ENSG00000285338.1	AC091564.7	1.42977415130969	0.529104259500631	0.00688711078589026	0.192844495772099	1.24191	1.25173	0.915204	0.328716	0.107873	0.503257	0.145857	0.486592	0.384194
ENSG00000225855.6	RUSC1-AS1	-1.01817565650284	0.377071243515337	0.00692934479030788	0.193765623510624	7.819491	3.011804	6.05286	8.091435	14.223908	9.865802	20.78167	14.235315	10.269013
ENSG00000104892.16	KLC3	-2.16257780374458	0.80106305914977	0.00694156040752049	0.193876129429569	0.0278272	0	0.155981483776	0.06436740321	1.7316615	0.0274199	0.151366	0.110862765047	2.102142681
ENSG00000132510.10	KDM6B	1.56647908984544	0.580739283857795	0.00698858201444258	0.194781050539113	28.926487	110.8837	36.764812	7.850783	7.805743	11.281333	24.94152	18.5346067	9.773547
ENSG00000166135.13	HIF1AN	0.734190287815261	0.272264307431321	0.00700495403835579	0.194781050539113	12.448099	10.00707	10.94596	5.386044	3.776042	8.853423	6.229475	5.207314	6.264873
ENSG00000136122.15	BORA	-1.6385783795662	0.607700326312394	0.00701020222240709	0.194781050539113	0.887059	0.461674	1.313948	3.020523	6.147105	1.467789	13.088953	3.810081	6.301216
ENSG00000135480.15	KRT7	-2.00928333237406	0.745253022334035	0.00701547196221605	0.194781050539113	3.036367	6.353198	3.840498	34.937344	72.480773	42.245397	6.638507	335.78184	56.323919
ENSG00000179008.8	C14orf39	2.04572249483417	0.758644867800059	0.00700622454802236	0.194781050539113	1.2117	1.286812	1.59778	0.0150073	0.0151765	0.25236669	0.0368894	0.310053	0.192106
ENSG00000180871.7	CXCR2	-2.04270112841923	0.758574967553164	0.0070851829476723	0.194871602737796	0.262633	0.235623	0.323082	0.263478	0.626201	0.388081	10.23071	1.43364	0.0340678
ENSG00000228709.1	LINC02575	-1.55821444552048	0.578618468615417	0.00708141375638636	0.194871602737796	1.41139	0.204806	0.501123	0.220198	2.05969	0.626614	2.57894	3.00682	1.47479
ENSG00000204174.7	NPY4R	-2.19007590408327	0.812896798711137	0.00705657952903858	0.194871602737796	0.0143097	0.0455358	0.0318309	0.579922	0.4035408	0.154767	16.35471	2.87943	0.071377
ENSG00000083896.12	YTHDC1	0.42083815848275	0.156263384397281	0.00707839157737963	0.194871602737796	44.20815	45.62602	43.75584	32.109001	23.637955	37.878212	37.852066	32.756299	32.748314
ENSG00000171246.5	NPTX1	2.09708734031184	0.778647972682394	0.00707609099716924	0.194871602737796	15.370723	16.4014719	25.4655213	0.19122	0.128918	3.700386	0.2180125	0.265964	4.070082
ENSG00000137968.16	SLC44A5	-1.81078720255237	0.67209775187535	0.00705510594294364	0.194871602737796	0.2957132	0.2867726	0.2408904	0.092919	0.4158822	0.2094158	2.59538	2.789536	0.1683537
ENSG00000127804.12	METTL16	0.664893055586178	0.246697218318753	0.00703509178600524	0.194871602737796	15.820054	16.77052	17.34787	10.3612142	6.066239	12.620807	8.7713791	11.733134262	11.0588474
ENSG00000114993.16	RTKN	-1.27788091834942	0.474300322018734	0.00705484436687368	0.194871602737796	17.110884	6.392753	21.725921	15.8875079	32.337934	22.568955	99.607822	37.494403	25.873786
ENSG00000225883.2	BMS1P11	-1.46068186573889	0.542704137439986	0.00711339818086275	0.195117097719794	0.838274	0.246241	0.658998	0.878039	2.2258	0.954778	3.02148	3.77097	0.800055
ENSG00000106178.6	CCL24	-2.04910566265438	0.76140314255422	0.00711905867815284	0.195117097719794	0.3944263713	0.2546849187	0.4007416547	3.48581	4.21746	4.67793	42.59064	5.49541	1.0759906315
ENSG00000087586.17	AURKA	-1.74599840049794	0.648742850734078	0.00711620685967292	0.195117097719794	2.2715751791	0.430171	1.577815	5.2213620531427	10.3519070013807	1.616418	16.7125390297149	21.3359350216006	9.02244990134674
ENSG00000147099.20	HDAC8	-0.454906345815441	0.169107638160089	0.00714434108991093	0.195126177311292	19.8972697	13.9271976621	17.547156887	12.085042789448	20.1711296492709	21.2917962	25.706280436754	24.1303503	22.2087917859578
ENSG00000253105.5	AP003548.1	1.99815927795092	0.742717097918375	0.00713798992176012	0.195126177311292	1.617319	2.47412	0.2994	0.230026	0	0.388281	0.37874	0.0855398	0.0893569
ENSG00000152213.3	ARL11	-1.55777167769041	0.578994086332969	0.00713494341439674	0.195126177311292	0.352928	0.150017	0.171601	0.495698	0.899485	0.528388	3.15353	0.809053	0.448624
ENSG00000145248.6	SLC10A4	1.75047536588636	0.65122371738439	0.00718860201064505	0.195878968376009	1.16947	0.580417	1.50547	0.345258	0	0.155741	0.27299	0.521701	0.114818
ENSG00000148848.14	ADAM12	-1.95989623658297	0.72908153946936	0.0071844480752862	0.195878968376009	0.558563	0.219562	0.131556	0.7345539	0.199885	1.2983691	12.072058	2.2212173	0.454037
ENSG00000198597.8	ZNF536	1.69708517791109	0.631480755345038	0.00719957083946928	0.195950268520637	0.7745217	1.005218	2.896497	0.9016272	0.2804448	0.7868236	0.0710674	0.0792599	0.541395
ENSG00000156395.12	SORCS3	2.00463313979196	0.746683668132606	0.00725915912898299	0.196432678575629	0.264016	0.528263	0.315156	0.0956495	0	0.111434	0.00903762	0.00818667	0.111291
ENSG00000260391.2	AC022336.2	1.82002977111633	0.677802441951423	0.00724881268599227	0.196432678575629	7.95033	4.41662	3.44404	0.278676	0.137919	1.49076	0.373573	0.428204	1.70461
ENSG00000262576.2	PCDHGA4	1.26882366439325	0.47254947761681	0.00725168032617495	0.196432678575629	1.201836	0.717996	0.955582	0.212514	0.163046	0.487346	0.470856	0.161092	0.262215
ENSG00000161958.10	FGF11	-1.03336523989899	0.384845535707927	0.00724988117299321	0.196432678575629	0.7516002	0.186555	0.5025269	0.6075844	0.6551905	1.622105	1.3181055	1.2192819	1.040544
ENSG00000181982.18	CCDC149	1.06635756816786	0.397194291798598	0.00725894382621029	0.196432678575629	16.32335	30.428829	20.436166	10.6591905	6.1298677	15.708664	7.1491713	7.200415	11.584787
ENSG00000196428.12	TSC22D2	1.47495603463864	0.549499628205258	0.00727079006652621	0.196520743952502	25.829336	102.360594	26.058659	10.649708	9.763462	15.790352	11.848009	20.887647	11.858541
ENSG00000276180.1	HIST1H4I	-1.56477494407198	0.583457786843054	0.00732055244145745	0.197231936204461	0.275618	0.399724	0.419128	0.394233	1.5222	0.452882	1.36767	3.19365	0.417248
ENSG00000243055.1	GK-AS1	-1.98007619835357	0.738132458317546	0.00730635332011286	0.197231936204461	0.222757	0.107833	0.226207	0.0868621	0.790507	0.22003	2.57631	1.45412	0.101252
ENSG00000237476.1	LINC01637	-1.43750955064342	0.536020495825169	0.00732232285214125	0.197231936204461	1.24549	0.502361	0.526887	1.13326	4.5838	2.25496	3.79968	1.08384	2.07558
ENSG00000127472.10	PLA2G5	2.04141560894944	0.761374311032342	0.00733532427700744	0.197296541556369	39.768081	25.515551	19.906753	0.9572865	0	4.2980621	2.479385	2.9503007	4.8858776
ENSG00000105991.8	HOXA1	-1.14256135304453	0.426179184157342	0.00734154046198843	0.197296541556369	0.940913	0.2569865	0.47672	0.518224	0.895274	1.319905	2.66551	1.15385	0.829327
ENSG00000046653.14	GPM6B	1.80060901265949	0.672664484174205	0.00743221562283518	0.198471834757324	20.949305	16.39667	44.728951	3.031186	0.7403985	13.315005	4.157269	1.028066	4.527386
ENSG00000167767.13	KRT80	-1.98222606286168	0.740531183962565	0.00743373207080965	0.198471834757324	0.013735173628	0.291914	0.083478205559	0.46546980201218	0.31431166395	0.22998610392	4.986516	1.234944	2.5255
ENSG00000136518.16	ACTL6A	-1.00711843759392	0.376162989252311	0.00742079795354544	0.198471834757324	20.576554	16.633048	19.913858	34.903056	54.454873	33.50124	53.984385	67.203407	48.21608
ENSG00000181061.13	HIGD1A	0.816273486642629	0.304847429353967	0.00741415416115355	0.198471834757324	149.483024	190.790559	169.250158	121.043285	66.220703	143.15028	72.668643	73.781593	113.614897
ENSG00000173207.12	CKS1B	-1.13625814224046	0.424369570922351	0.00741693571854393	0.198471834757324	19.606584	20.951615	18.598636	34.878811	62.91524	27.434206	55.81337	83.30494	63.597733
ENSG00000213918.10	DNASE1	-1.35034284728811	0.504488225328058	0.00743603182949098	0.198471834757324	6.537226	2.0279507	3.812828	5.5633884	13.550593	5.3211413	28.478776	13.580945	6.4564
ENSG00000152953.12	STK32B	1.1139634291463	0.416344296800725	0.00745995559481911	0.198737922659267	2.859073	3.5914561	2.2256012	3.314101	1.630085	2.4143271	0.9666314477	1.262916	0.70527351724
ENSG00000101104.12	PABPC1L	-1.35687868323475	0.507375553083942	0.00748835614981426	0.198737922659267	14.723988	9.2663541	9.706884	25.7709203	26.334149534	35.435224	64.605886	96.041369	18.2514542
ENSG00000103257.8	SLC7A5	1.53178872101176	0.572593115764069	0.00746894993376246	0.198737922659267	35.7109	117.2778	29.567949	12.5535	9.792172	6.39856	20.22487	19.110425	21.6395
ENSG00000163378.13	EOGT	1.69579404511008	0.634081584895427	0.00748608971628443	0.198737922659267	53.30132	219.43163	57.248492	8.610872	7.75685618	38.378178	22.036284	16.633073	28.613308
ENSG00000284753.1	EEF1AKMT4	-1.12406053305228	0.420199591556605	0.00747151273010418	0.198737922659267	1.14757	2.60123	1.24351	2.70693	4.53668	3.58091	5.03226	6.96428	4.38665
ENSG00000163156.11	SCNM1	-0.658677314271583	0.246501663572551	0.00753779820396476	0.199025461692485	45.247631	26.307101	31.136031	35.036049	54.719178	45.367793	61.323105	67.067929	57.378836
ENSG00000246877.1	DNM1P35	1.42867040342702	0.534462960899075	0.00751549072634675	0.199025461692485	0.521406	0.259996	0.64747	0.275605	0.0663599	0.331361	0.064511	0.0730299	0.198536
ENSG00000179934.6	CCR8	-2.05512971649123	0.769036325101295	0.00753233565365353	0.199025461692485	0.238624	0	0	0.13396	0.1669566	0.235269	1.049254	2.873653	0.303452
ENSG00000204866.8	IGFL2	-2.15175993128658	0.805125290530912	0.00752709310805022	0.199025461692485	0.1964146	0	0.0592172	0.153097	0	0.2438893	3.451791	2.8408064	0.224413
ENSG00000160408.14	ST6GALNAC6	1.3723794608868	0.513628257100409	0.00754160672795785	0.199025461692485	92.817862	139.1666207996	85.5092983	21.283361	10.57668	61.309476	23.4693048	29.605876	33.514114
ENSG00000275437.1	AL121832.3	-1.6664614257159	0.623949162039375	0.00756642145401508	0.199455970486121	0.157951	0.263564	0.174544	0.347335	1.16706	0.155578	2.29903	1.42142	0.299865
ENSG00000234129.7	AC073529.1	-1.70932284749015	0.640615665925142	0.00762474650581972	0.200113844855335	0.0571061	0	0.1390965	0.0871983	0.44326	0.337763	0.3357087	0.1789052	0.3180519
ENSG00000185650.9	ZFP36L1	1.3283233831348	0.497749613958048	0.00761549987925373	0.200113844855335	487.19469	393.831489	391.489502	48.995452	56.995994	130.05244	182.157385	127.412986	125.237363
ENSG00000035499.12	DEPDC1B	-1.80955747784962	0.678202859318287	0.00762666773779834	0.200113844855335	0.349426	0.2129054	0.1131229	1.8933	2.6204352	1.128908	6.953376	5.497087	2.89811
ENSG00000214273.4	AGGF1P1	-1.87255324830902	0.701884944598112	0.0076328783197027	0.200113844855335	0.0268318	0.0259296	0	0.0251935	0.168916	0.0793151	0.215714	0.0782959	0.0815335
ENSG00000138593.8	SECISBP2L	0.6278274977238	0.235331633477104	0.00763402630516708	0.200113844855335	13.035911	9.72648	12.256207	7.7932392	4.219896	10.1657291	7.2920315	6.464839	8.346706
ENSG00000204380.4	PKP4-AS1	-1.50692555996258	0.566260911850824	0.00778659507549957	0.202529165261968	0.4295014	0.155562	0.2045951	0.7008018	1.0363767	0.951993	2.893188	1.3653209	0.5487532
ENSG00000099822.2	HCN2	1.03317400480367	0.388225644463855	0.00778460621778131	0.202529165261968	0.657977	0.181619	0.698269	0.391171	0.173067	0.276585	0.270374	0.258475	0.197759
ENSG00000101911.12	PRPS2	0.878359539896897	0.329991155898452	0.00777316852605757	0.202529165261968	49.765823	50.706076	64.409849	18.574049	19.442294	24.418239	28.984039	31.683868	22.280563
ENSG00000253553.6	AC090578.1	2.0500896718366	0.769948400941644	0.00775320276439245	0.202529165261968	0.2726071	0.7193512	0.6805509	0.0308981	0	0.1519445	0.0380214	0.0344102	0.129016
ENSG00000248290.1	TNXA	1.91641884192114	0.719987038123751	0.00777377255811029	0.202529165261968	2.82217	6.16604	1.83126	0.325143	0.198784	1.2071	0.0736913	1.00504	0.0827669
ENSG00000226396.1	AL031727.1	-1.70233047817351	0.639201469277024	0.00773981109515512	0.202529165261968	2.35573	2.28424	0.998877	3.52122	7.12253	2.33263	9.12395	32.5323	3.93199
ENSG00000130193.7	THEM6	-1.23750487487977	0.46490865437645	0.00777185728295511	0.202529165261968	6.906262	3.912537	5.265697	11.057397	23.00081	8.842488	28.883855	18.9520742	12.742
ENSG00000241449.5	AC092666.1	2.17539782867234	0.817834489195564	0.00781525420404051	0.202653407623128	0.619748	2.735039	1.1660157	0	0.162967	0.204609	0	0	0
ENSG00000100441.9	KHNYN	0.648468072875169	0.243797709327923	0.00781728544814504	0.202653407623128	29.469957	29.074236	32.291516	32.1551426	18.978905	28.931562	20.525838	16.3635458	18.875764
ENSG00000100461.17	RBM23	0.512356650195702	0.192595503583151	0.00780772991211315	0.202653407623128	46.890939	53.442981854	53.3446	36.856728	28.254204	45.270499	37.524035	34.935596	31.353926
ENSG00000182950.2	ODF3L1	1.48639645469974	0.558957997606988	0.00783200677629444	0.202792066862738	1.96777	6.7817	2.71135	2.47998	0.835963	2.78603	0.678599	0.438533	1.19165
ENSG00000229152.2	ANKRD10-IT1	-0.81718500944257	0.307340989943335	0.0078399217699375	0.202792066862738	16.5797	10.9385	13.0859	12.8671	17.3703	20.5785	45.7723	28.4782	17.5023
ENSG00000170439.6	METTL7B	-1.7998381602215	0.677092838643589	0.00785627085165817	0.202991156884088	0.689911	0.483567	0.195016	3.75286	12.0533	3.90667	8.49665	7.95739	2.90076000094876
ENSG00000277053.4	GTF2IP1	0.806366977605367	0.303599531922091	0.00790685009996562	0.20376368840887	84.60749	121.25663	94.81913	51.179282	33.6395180040324	65.147742	54.302204	45.766552	65.182872
ENSG00000179141.9	MTUS2-AS1	2.15341487430288	0.811287780687473	0.00794691530481308	0.20376368840887	0.112178	0.955935	0.142091	0.0218818	0	0	0	0.0487214	0.0966148
ENSG00000141338.13	ABCA8	1.32005054921944	0.497529590155826	0.00797302186434265	0.20376368840887	21.521903	14.2736073	14.6082006	13.0038531	3.9504846	13.82611	3.469651	1.7644113	7.39954865
ENSG00000261326.3	LINC01355	-0.594796015993002	0.2240346023007	0.00793250466417134	0.20376368840887	4.33431	2.60404	3.33018	2.83297	4.28958	3.95635	6.46228	5.65631	5.67234
ENSG00000184838.14	PRR16	-0.910644185173339	0.343171670635852	0.00796355288058314	0.20376368840887	3.172461	2.474093	2.567855	2.9862400547928	3.424565	7.91782	8.510303	7.262152	2.799226
ENSG00000125618.16	PAX8	-1.76804437453535	0.666162456417657	0.00795264130975498	0.20376368840887	1.34898033321	1.708121	0.3615728	2.4126883595	3.66821020073675	2.156529284	28.0846539789911	4.42793370643782	2.56278100162809
ENSG00000225411.3	CR786580.1	-1.66650229607609	0.627554574243093	0.00791792894487277	0.20376368840887	0.108856	0.0350739	0.0367765	0.1547683	0.114518	0.214579	0.550332	0.4368795	0.620642
ENSG00000126562.16	WNK4	-1.80330047867126	0.678926081787233	0.00790484729555768	0.20376368840887	0.3921148	0.2155944	0.675794	0.550773	3.485418	0.497046	6.9094	0.449722	0.704698
ENSG00000162572.20	SCNN1D	1.12349841321848	0.423444917354309	0.00797246019745436	0.20376368840887	4.927097	4.778148	7.408101	3.680561	1.4958612	5.110143	1.2291019	1.846117	2.334805
ENSG00000141570.10	CBX8	-1.02231744819406	0.385121419658572	0.0079418313482811	0.20376368840887	3.135049	1.601169	2.121009	3.19251	5.56363	3.26625	7.20734	8.25662	3.87792
ENSG00000267575.6	AC006504.5	-1.25438332971158	0.473149744206573	0.00802220289772431	0.204797499655615	3.807372	2.193022	1.2853829	3.0066074	11.268049	3.695002	6.730924	6.181205	5.501519
ENSG00000279882.1	AC112702.1	-1.41701718458788	0.534998511027202	0.00808169366942357	0.205374158496943	3.22939	0.571119	2.39851	1.83471	3.95399	6.12342	4.57472	13.6127	3.48545
ENSG00000171476.21	HOPX	-1.92933269879964	0.728373824426498	0.00807728327454571	0.205374158496943	18.34302842921	4.930599080705	25.9010121	6.719680805	2.85510567172	66.4040357	33.842701638	31.310683227	315.1971282
ENSG00000206549.13	PRSS50	2.06353410572285	0.778761452927552	0.008054800101547	0.205374158496943	0.447515	0.868208	0.316974	0	0	0.114416	0.0555844	0.0274717	0.0574618
ENSG00000167778.8	SPRYD3	0.83716290043919	0.316107285953184	0.0080885606943939	0.205374158496943	57.323727	56.344959	53.190932	27.0176303	19.489736	41.097445	21.381098	22.970647	34.318393
ENSG00000077152.10	UBE2T	-1.63290191155626	0.616365115087709	0.00806719372318456	0.205374158496943	3.345562	0.788655078526	2.6031653	11.663484257	21.861419402858	7.962294	28.761706	18.2503576	23.092536104367
ENSG00000020577.13	SAMD4A	1.81182744858255	0.684531368458131	0.00812539471216869	0.205578900762994	18.92383236	134.792689	32.6355969	2.91050672	3.771216	20.12393754	7.717882	7.2201926	14.6179344
ENSG00000284966.2	AL138689.2	-1.1767653670876	0.444763139130742	0.00814919985122476	0.205578900762994	0.389126	0.3760747	0.8753567	0.2304323	1.1185313	0.7368103	2.029424	1.0974109	0.8837356
ENSG00000139112.10	GABARAPL1	1.32927910229108	0.502263633512878	0.00813111245095843	0.205578900762994	192.625872	211.821754	141.644643	28.165398	22.69107	74.8435997481	39.079086	59.685328	74.3125074361109
ENSG00000171189.17	GRIK1	1.82139515155428	0.688347408380873	0.00814400545171667	0.205578900762994	0.2186902	0.8406873	0.097009700491415	0.0639314560445	0.0473598	0.101032	0.1082273483801	0.0593782334721	0.014140800720941
ENSG00000060138.12	YBX3	1.42278512664	0.537645573197271	0.00813715042338833	0.205578900762994	526.245706	1133.142033	582.368105407369	91.1558248	98.537148	318.135336	177.775317	203.875732	231.254711
ENSG00000166546.13	BEAN1	0.922857861512004	0.34871172292027	0.00813348241832317	0.205578900762994	1.326782	0.5918943	1.052004	0.5840476	0.339363	0.665494	0.601951	0.503975	0.2909067
ENSG00000179598.5	PLD6	1.09265442270106	0.413141057511371	0.00817515194480158	0.205690673502806	4.7752	7.83848	3.81804	3.34704	2.02715	2.0538	1.64606	1.83428	3.95233
ENSG00000165480.15	SKA3	-1.89852676587867	0.717815899854185	0.00817233072818055	0.205690673502806	0.365411	0.0665837	0.1956	2.335101	4.082385	1.26398	12.652775	3.783168	4.812681
ENSG00000274993.1	AC254629.1	-2.12250233739767	0.80259452795119	0.00817993258506107	0.205690673502806	0.0572715	0	0.0580354	0.32799	3.130719	0.103595	1.778058	2.33356	0.0260049
ENSG00000205740.2	AL359878.1	-1.23023525150394	0.465402151463702	0.00820825888113049	0.206181971745399	0.2105649	0.05016	0.1782771	0.1275364	0.3300189	0.2756425	0.6214247	0.270738	0.355777
ENSG00000137727.12	ARHGAP20	1.63977526896176	0.620494552812515	0.00822500997551034	0.20619710380373	6.62782814121	3.136615	2.26728	0.248555000124871	0.286269	1.58591800021334	0.407062000086689	0.676025000086614	1.012192
ENSG00000065600.12	TMEM206	-1.05149387258912	0.398003284089026	0.00824368915461135	0.20619710380373	2.594995	0.657998	1.565857	1.82246	2.35571	2.580416	6.10529	4.60344	3.495935
ENSG00000155324.9	GRAMD2B	0.681797960433633	0.258022610179075	0.00823216982697682	0.20619710380373	10.0335362014161	14.657576	11.5966074102841	8.7619490209484	6.2542536227529	9.392096	8.676245	7.442065	5.566458
ENSG00000064989.12	CALCRL	-1.33020878120813	0.503546555471088	0.00824959985309598	0.20619710380373	5.322981	3.1537657	5.574789	2.915241	3.009553	19.942455	24.065263	14.72268	4.331137
ENSG00000164171.10	ITGA2	-1.63648053648799	0.619515679035795	0.00825280595335675	0.20619710380373	0.884702	0.531691	0.743341	2.49037	6.99686	1.73597	10.7392	4.3797958	1.33867
ENSG00000152495.10	CAMK4	0.952934700055982	0.360887459938508	0.00827761012504628	0.20659682036565	0.8633336	1.045465	1.9482421	1.548987	0.54479	0.809532	0.786242	1.04655	0.4778777
ENSG00000273179.1	AC092535.4	-1.48346026985483	0.561981929575338	0.00829809395656265	0.206668346406493	9.79961	1.70825	7.17258	11.3744	5.95671	30.4072	43.198	16.023	41.9343
ENSG00000267547.1	AC060766.4	-1.044295432531	0.395574778575918	0.00829196228428543	0.206668346406493	1.78787	0.577446	0.908654	0.929371	1.7621	3.38853	2.58992	2.46617	2.03275
ENSG00000141576.15	RNF157	1.31600416362203	0.498763727922929	0.00832657887756166	0.207157865372719	5.8933565	3.1154557	9.65424052	1.4898586	0.8348421	2.219932648	1.511779	1.50803577473	3.3039137
ENSG00000107798.17	LIPA	-0.758389872021563	0.287616236909736	0.00836892615982013	0.207359557667504	23.463316	12.64150294673	14.195950781879	18.5992845905	19.5757530157395	25.0171435525	37.8200116	44.899406241068	31.0526160164844
ENSG00000213896.4	AC109486.1	1.85248063749242	0.702557681490059	0.00837003968761461	0.207359557667504	5.63012	1.36849	4.31015	2.41832	0.222847	2.48447	0	0.246174	0.77099
ENSG00000130203.9	APOE	-1.75706904323195	0.666140824515281	0.00834743086233553	0.207359557667504	44.702741	14.866566	21.1339415	136.15904	66.5758326	101.685172	203.7557	687.723326	405.90297
ENSG00000127528.5	KLF2	1.23403124315464	0.467976593992094	0.00836549695162132	0.207359557667504	66.956828	140.658	46.78556	83.00233	32.238	67.14821	35.41661	33.88188	14.44027
ENSG00000119725.18	ZNF410	1.09151983008318	0.414242750729884	0.00841431583662632	0.207361621683918	41.641136302476	98.996921189	41.57924413428	22.95652	19.6315968	30.125644	27.609471	21.102192887	24.5784652
ENSG00000172478.17	MAB21L4	-1.97803165259095	0.750371557841441	0.00838725261252237	0.207361621683918	0.0285869	0.027627	0.521799	0.223049	1.1781735	0.5096167	5.456239	0.200863	0.833916
ENSG00000125651.13	GTF2F1	0.495856923269998	0.188178549409556	0.00841287931104407	0.207361621683918	49.41588658	45.931627	53.121651	32.638716	23.157889	42.400904	39.10727	30.172672	35.377303
ENSG00000172201.11	ID4	1.14656337821728	0.435046172378442	0.00840138861794357	0.207361621683918	31.6211	21.9254	24.3911	10.2423	3.07031	14.8266	11.5571	15.3099	5.61936
ENSG00000130675.14	MNX1	-2.12388239390365	0.805955895884341	0.00840792931128765	0.207361621683918	0.070782	0.0684172	0	1.219303	5.67659	0.2457206	15.60194	5.48706	0.790397
ENSG00000164619.9	BMPER	1.81345633112094	0.68846164802972	0.00843680353215884	0.207697636587596	17.2681871384607	5.0067814812801	9.45200803	1.21916036615	0.376822	4.9812129658793	0.712448294696	0.25367999	2.06263351061311
ENSG00000181585.4	TMIE	1.68636063226174	0.640570972090894	0.00847366094488557	0.208176694093316	1.682180925642	0.643613	1.3741370590307	0.218748	0.055303	0.24178	0.118784109791	0.0913425	0.6683930403689
ENSG00000136111.13	TBC1D4	-1.54749054431288	0.587823724257951	0.00847400975487475	0.208176694093316	4.0002696	1.08742	1.31891	4.411398	3.443266	7.538451	30.45198	8.926277	4.468821
ENSG00000227536.1	SOCS5P4	-1.47578256263033	0.560684660104016	0.0084856890995509	0.208245556448288	0.11037	0.0711243	0.111866	0.0574089	0.290277	0.145045	0.247213	0.383574	0.267306
ENSG00000277954.1	AC092376.2	1.30338306091356	0.495335461381677	0.00850554477694625	0.208514718925743	0.74436	0.805853	0.883977	0.130184	0.111398	0.417134	0.221458	0.278591	0.221396
ENSG00000151468.10	CCDC3	1.67922059736585	0.638370579518964	0.008526456110824	0.208809172041797	69.835621	118.044	20.7050325	9.7025793	4.10504	28.5438771	18.561321	18.697397	3.9142773
ENSG00000283293.1	RN7SK	-1.37441975690005	0.522712640864647	0.00855360988242195	0.2092557262268	2.92598	2.13973	1.87336	2.25085	7.56855	2.18394	5.36377	12.1873	7.69643
ENSG00000171303.6	KCNK3	1.69737605175656	0.645660552795437	0.00856619271536446	0.209345257599131	12.518	12.4577	17.0411	1.96017	0.678496	5.08055	0.95334	0.848966	5.93893
ENSG00000283782.2	AC116366.3	1.0750277811533	0.409022248976087	0.008581612791292	0.209503868570761	3.795058	3.788154768	3.43875000013744	2.05694810035655	0.44415200235717	2.32618140531332	2.7290980522993	1.3184090012977	1.35461001815421
ENSG00000136928.6	GABBR2	1.69709264176001	0.645877360765374	0.00859953205311773	0.209505318274346	0.1403089	0.278043	0.163965	0.11194102	0.1131598	0.00885731	0.0258604	0.0312344	0.0244966
ENSG00000189366.9	ALG1L	-1.61841429429683	0.615891520609836	0.00859494629528671	0.209505318274346	1.17456	1.5454	1.29672	1.059023	12.1108	1.514	2.1777	5.20219	2.45768
ENSG00000273541.1	RF02104	-1.78044863530909	0.677848946126806	0.00862386871803966	0.209880273852623	1.01937	0	0.817747	5.17889e-09	2.54653	1.36294	1.59636	3.15927	3.11803
ENSG00000196417.12	ZNF765	-1.17083580926306	0.445898961187943	0.00864488306600177	0.210173680426391	3.236516	2.093051	2.237546	2.2120202	10.770145	3.4447906	6.03491	4.652311	3.980879
ENSG00000163545.8	NUAK2	-1.71457521331045	0.653541462592304	0.00870278540018289	0.210925669704226	1.14749	0.387387	0.722573	2.874	5.38966	1.34413	17.2614	6.28833	2.09773
ENSG00000079385.21	CEACAM1	-2.07366148435879	0.790262238106076	0.00868994679621225	0.210925669704226	1.4749579	1.6736224	0.556246	10.218702	126.211334	1.3843499	34.793676	11.9242098	3.2379373
ENSG00000160808.9	MYL3	1.55245002593887	0.591687234745571	0.00869630013759889	0.210925669704226	3.460883	4.188924	1.687931	0.7332687	0.244124	1.91915	0.816867	0.301729	0.678339
ENSG00000077238.13	IL4R	1.21534868833378	0.463509864290636	0.00874011416136933	0.210958660843504	107.571893	235.743384	205.644072	35.3793783	47.2660628	77.2947611	63.708732	70.269738	50.7482046
ENSG00000263711.5	AC079062.1	-2.15902384056358	0.823102875751949	0.00871515035908096	0.210958660843504	0.0206307	0.0142381	0	0.1428927	0	0.119041	2.100916	6.631483	0.130489
ENSG00000140044.12	JDP2	0.747234383117167	0.284957068543842	0.00873461921239786	0.210958660843504	37.200582	29.6585527	21.8446246	20.205618	12.294756	23.803337	20.481822	10.772698	17.270457
ENSG00000143228.12	NUF2	-1.60437255469531	0.611769381323987	0.00872841893762272	0.210958660843504	1.325971	0.295611	1.0805088	4.693571	6.57098198	3.669747	13.232401	7.252084	9.317498
ENSG00000249852.1	AC145676.1	1.61335292550551	0.615512179357934	0.00876323677047229	0.211104262274763	0.668592	1.80378	1.01624	0.0869451	0.0879246	0.301954	0.240558	0.314581	0.328878
ENSG00000138193.15	PLCE1	1.04913918788952	0.400263711402151	0.00876414268171091	0.211104262274763	15.061252	6.565641	13.463327	6.822887	6.560474	6.986007	3.525603	3.714042	3.146097
ENSG00000118193.11	KIF14	-1.64054556671659	0.626101365612947	0.00878639020491462	0.211423077535899	0.143853	0.0823457	0.107352	0.738488	0.991773	0.477182	1.95913	1.04514	1.690952
ENSG00000166183.15	ASPG	1.61441942576836	0.616213475637332	0.00879548259394679	0.211425017557977	1.5528055	1.44802	3.0350413	2.16863187	0.5716023	0.3219909	0.0606263	0.3979811	1.423501
ENSG00000144792.9	ZNF660	1.07433975242842	0.410312749636637	0.00883577912457524	0.212176268210501	2.865124	1.78809	1.959342	0.729676	0.450506	1.57251	0.701078	0.635077	0.955666
ENSG00000112742.9	TTK	-1.8540331504184	0.708256920584104	0.00885139704817464	0.21233397356567	0.339814	0.0518386	0.326132	2.2712984	4.870926	1.07531	6.3847296	4.961675	6.3670517
ENSG00000100399.15	CHADL	1.46895976366073	0.56140187822332	0.00888123808417389	0.212832202954856	5.04264	3.906032	10.662054	1.615368	0.78125	3.894017	1.126964	0.6647289	2.221072
ENSG00000101544.8	ADNP2	0.910201636078335	0.347974739033894	0.00890416745700071	0.213163951743565	7.72297	16.396372	11.708232	5.58829	4.13157	6.76716	6.883894	6.31164	4.86784
ENSG00000203335.4	AC006019.1	2.11736925910909	0.809598284247474	0.00891404524723231	0.213182890464136	0.0221394	0.256708	0.224309	0.0172747	0	0.0436235	0	0	0.0201037
ENSG00000122863.5	CHST3	1.79962008941452	0.689011679266906	0.00900442244085181	0.214687759029293	12.7388	54.9176	20.1345	1.63355	0.726398	11.6384	3.1375	3.51899	6.39605
ENSG00000135913.10	USP37	0.852523104893644	0.326327752236047	0.00898892579664714	0.214687759029293	2.0613884	2.2091032	2.260096	0.856835	0.8675772	0.755459	1.2425331	1.1677185	1.15056
ENSG00000245750.8	DRAIC	-1.76001132555365	0.673799572060856	0.00899959511861222	0.214687759029293	0.5448428	0.0385825	0.2237667	0.533202	1.6238158	0.4015599	4.0874378	1.5763737	0.603753
ENSG00000110900.14	TSPAN11	1.45945102981212	0.559171363885194	0.00905357050449017	0.215421721709781	12.844158	9.876549	20.777555	3.430821	0.575491	5.453635	3.87342	2.959807	6.598627
ENSG00000247400.3	DNAJC3-DT	-1.15571741859569	0.442780402300333	0.00905060239654007	0.215421721709781	1.33622	0.591713	1.00778	1.20191	2.78238	1.775437	5.3035	1.46664	1.7357
ENSG00000176268.5	CYCSP34	-1.73014460079039	0.663067860739154	0.00907270112857739	0.215658197748282	1.71526	0	0.880574	1.00754	2.39866	4.69832	10.5074	4.14371	1.17788
ENSG00000196275.13	GTF2IRD2	0.663780720627223	0.254593220244106	0.00912804977187523	0.216421243289895	27.848333	25.518402	27.21198	21.582976	11.619473	24.555743	16.86518	12.0126863	20.110098
ENSG00000114737.15	CISH	1.44358416677597	0.553722235390492	0.00913247648680772	0.216421243289895	12.63046	58.34402	22.92273	6.201601	7.157311	6.289731009	14.04121	10.23193	5.768789
ENSG00000113231.13	PDE8B	1.58006031556084	0.606029727484549	0.00912773967210395	0.216421243289895	16.43386	9.867012	9.639626	1.546175	0.447099	4.252075	1.368752	2.19555	4.901029
ENSG00000171174.14	RBKS	1.61279845664942	0.618922021031722	0.00916550134052682	0.216765954586794	25.7363834	14.6535772	1.69465	1.7772682	2.909576	2.5374065	3.705684	3.0563752	1.90749
ENSG00000245614.3	DDX11-AS1	-1.51787610163525	0.582477653498842	0.00916343195258198	0.216765954586794	0.137236	0.1386488	0.166875	0.13321436	0.562729	0.16904618	0.324518	0.4465688	1.176085
ENSG00000124766.6	SOX4	-1.3889174436424	0.533116891436292	0.00917998751996694	0.216889916622301	10.1724	8.22824	2.72881	8.09029	15.0018	6.78662	45.2118	37.7979	14.4104
ENSG00000276566.1	IGKV1D-13	-2.10322213312032	0.808187496697052	0.009257548152683	0.217408745956052	0.27863	0	0	0.870309	10.5737	0	1.89759	3.13477	4.34836
ENSG00000168875.2	SOX14	-2.13555481252855	0.820326206589886	0.0092331252716484	0.217408745956052	0	0	0	0	0	0.0266951	1.87148	0.188263	4.30546
ENSG00000247381.3	PLUT	-2.12917574136944	0.817920807571322	0.00923698194056951	0.217408745956052	0	0	0	0.084585	0.410583	0.0213598	1.93392	0.11298	0.0984366
ENSG00000159212.12	CLIC6	-1.65664782147349	0.636532310052902	0.00925160852745829	0.217408745956052	1.652849	1.77724	0.52235100733359	3.42563	12.266727	1.11193	5.47829	13.735037	7.004564
ENSG00000149289.10	ZC3H12C	1.18411798849902	0.454870858696606	0.00923591426114696	0.217408745956052	3.0889184	6.334007	3.400813	1.339583	0.552937	2.024849	1.729039	1.931389	1.739186
ENSG00000094804.10	CDC6	-1.86077615646207	0.715018045220719	0.00925688264114001	0.217408745956052	0.9335758	0.3889913	0.5326231	4.839355	25.060949	2.304108	9.627567	9.150091	3.531014
ENSG00000109193.11	SULT1E1	-2.14308947329186	0.823684714054945	0.00927271898555365	0.217547260120074	0	0	0	0.248173	1.55695	0	2.58576	8.341569	5.17608
ENSG00000131748.15	STARD3	-1.44475679173842	0.55535920219481	0.00928220219755372	0.217552193563245	32.608505	23.210833	27.8544910939	35.641959	113.90156974	43.743408	267.951837	54.1364	29.727923
ENSG00000160145.15	KALRN	1.21213612412069	0.466027685822216	0.00929535509427426	0.217643039787194	47.781018	76.74906867439	49.630607	20.9207461	28.84426172694	13.543526514	11.4394273328685	22.528188001259	20.716061
ENSG00000261211.1	AL031123.2	-1.94764907021253	0.749010398306359	0.00931432615282879	0.21786979648207	0.0482466	0.0310742	0	0.250975	0.60913	0.126731	1.60369	0.782063	0.204433
ENSG00000006062.15	MAP3K14	1.30084374704469	0.500743923367911	0.00938170217073673	0.218034352757152	30.913556	50.346443	47.183693	8.535733	5.94542	19.02544	8.3787300022521	12.63106	20.648832
ENSG00000156232.7	WHAMM	0.750120031844864	0.288592734878261	0.00934320747466553	0.218034352757152	6.099412	10.195832	6.284116	4.629563	3.440567	4.595319	4.434097	4.804119	4.04997
ENSG00000145414.8	NAF1	1.04800821851025	0.403267204231267	0.00935520121895456	0.218034352757152	11.374388	15.251196	8.836098	3.3698626	2.4754783	6.162448	5.191491	4.959112	5.172963
ENSG00000278126.1	AC139768.1	1.05342443594933	0.405238536373696	0.00933550734428385	0.218034352757152	4.82295	7.86925	5.7691	3.8184	1.41957	4.19034	2.21544	1.81528	4.18612
ENSG00000086300.15	SNX10	-1.16264504026935	0.447575735537206	0.00938641559544452	0.218034352757152	3.276039	1.421341	3.138091	2.4342672	2.146991	5.0866	8.9229894	12.9101397	4.47701
ENSG00000132938.19	MTUS2	1.99733930623938	0.768784511939115	0.00937553010216454	0.218034352757152	6.915748	1.978308	6.831643	0.1218868	0.0383975	0.898523	0.1651732	0.0452638	1.44018
ENSG00000241158.6	ADAMTS9-AS1	1.89563124242486	0.729739890086036	0.00938557178121067	0.218034352757152	13.677099	22.4052725178	7.1078267	0.3621181	0.4413757	6.3712331	1.550961368	1.5032163	0.3178606
ENSG00000107968.9	MAP3K8	1.62763865852285	0.626714340177819	0.00940150532692576	0.218168859025722	37.498175	197.055685	42.044763	12.311549	7.246626	26.342878	30.11259	31.324814	10.889864
ENSG00000074803.18	SLC12A1	1.99457018415527	0.768148906630868	0.00941533743178458	0.218273944157212	0.0178811	0.070100453966	0.295327412	0.004659953	0.009425617	0.0117387	0.0139139	0.00517449	0.021645
ENSG00000204267.13	TAP2	-0.84662404713567	0.326171722982405	0.00944152032696318	0.218664865144011	50.7856127	25.840052	26.296819	46.7708113589	60.27963	54.9092334	90.3809	98.9156734	62.38475
ENSG00000204410.14	MSH5	-1.17537595097138	0.452936766328568	0.00945878552403072	0.218848685581149	8.6684834	5.6639118	8.0091783	15.2331987	29.9828167	11.3034374	28.1615736003118	32.1627101	19.4101676
ENSG00000183091.19	NEB	-1.76248692051461	0.679429409764557	0.00948473884641527	0.219232963621427	0.6666172	0.154009	0.5005395	0.73409795	5.24769433	0.2816676982	4.1853572	0.656308064561047	1.7882055201
ENSG00000103740.9	ACSBG1	0.901844715153884	0.347861134316376	0.00952694569346993	0.219991804049703	1.2096571	1.115345	0.9667074	0.372064	0.396935	0.7124722	0.494152	0.477615	0.393637
ENSG00000072571.19	HMMR	-1.75602323847525	0.677679721662174	0.00956338748080475	0.220616158984425	0.502221	0.139328	0.140351	2.339226	2.865294	1.7872205696	4.711878	6.345372	5.741314
ENSG00000077348.8	EXOSC5	-1.23835259049423	0.477978217994245	0.00957492666448848	0.220665377677372	8.626393	6.655684	8.08969	11.101983	36.666033	9.377283	26.60898	28.510264	12.564212
ENSG00000164530.14	PI16	2.03899609543284	0.787196103938243	0.00959199217084144	0.22084173534849	115.9347	198.450784	68.171316	3.706708	0.1487768	48.16475	1.818	3.79403	7.48861
ENSG00000148677.6	ANKRD1	1.80802688973975	0.698301999181297	0.00962058643354846	0.220974726316335	0.56499	0.791718	0.343512	0.0440834	0.13374	0.111346	0.0542097	0.122694	0
ENSG00000174792.10	ODAPH	1.71976129300331	0.664261700299728	0.00962602490496117	0.220974726316335	0.2549682	0.145071	0.4252899	0.2774447	0.0911	0.032477	0.0632548	0.12266332	0
ENSG00000215374.5	FAM66B	1.48384332240914	0.573048948204228	0.00961480324132297	0.220974726316335	1.930564	2.108801	1.040335	0.4923722	0.065277	0.866982	0.4274998	0.303597	0.6598711
ENSG00000159217.9	IGF2BP1	-2.09300761628271	0.808666640035816	0.00964731893344819	0.221247066957603	0	0.0060121	0.012608	0	0.0147359	0	0.1674926	0.1673933	0.04086529
ENSG00000258476.5	LINC02207	-1.76102967922945	0.680602153306891	0.00966869024686071	0.221520646368749	0.0951784	0	0.197492	0.3398277	0.705171	0.63616	1.5488902	0.728327	0.530057
ENSG00000144868.13	TMEM108	1.41800557377896	0.548524195213672	0.00973426884278509	0.222626746358687	1.9850737	3.58025032312	3.4670334	0.948872526	0.1834758	0.6872864	1.2982775	0.5712521	1.6938972
ENSG00000183773.15	AIFM3	-1.51548557130465	0.586245657610881	0.00973594653953422	0.222626746358687	1.202558721718	0.723032669333	0.7781359	1.62372408485	3.707948	1.3313632	11.706049	2.36445749723	1.52010096
ENSG00000124233.11	SEMG1	-2.1141387891443	0.818467519863408	0.0097932425577066	0.223718854572887	0	0	0	0.02682	0.298342	0.304901	0	0.119456	0.0624369
ENSG00000122711.8	SPINK4	-2.1209384539038	0.821356443173622	0.00981616441616436	0.223806640784871	0.490885	0	0	1.3409	44.7932	0	273.485502	109.981	0.223794
ENSG00000165675.16	ENOX2	-0.627025151007424	0.242799913130093	0.00980939475414837	0.223806640784871	5.23352100043988	3.209359	5.687482	3.9214	7.424606	7.04104282987	9.097043	6.94683754	6.062243
ENSG00000270800.3	RPS10-NUDT3	-1.30699206997939	0.506338023847044	0.0098439295229806	0.224221777221988	1.675647	1.41596	0.381382	1.5285127	0.932768	3.275878	5.484922	5.16946	4.47819
ENSG00000166589.12	CDH16	-1.98734824233974	0.770317082253649	0.00988262535855157	0.224666931721878	0	0	0.0278887	0.0337176	0.263931	0.216955	0.0939466	0.0261401	0.199948
ENSG00000262714.1	AC007342.5	-2.06296494148727	0.799537397502343	0.00987436286276691	0.224666931721878	0.0258785	0	0	0.161535	1.28642	0.0509967	0.893759	0.0899117	0.540503
ENSG00000141664.9	ZCCHC2	0.89858111780497	0.348405860672374	0.00990518818294423	0.22470952784067	10.7849441	19.0326547	9.7113952	6.4768635	5.1159333	8.3129051	5.58874	6.8079992	6.19329
ENSG00000162878.12	PKDCC	-1.12363362821195	0.435712600130551	0.00991323308107472	0.22470952784067	106.18356	35.329198	66.00402	37.4071	197.07983	126.39281	205.72494	74.893286	94.68384
ENSG00000249395.2	CASC9	-2.12443154768181	0.823690767158158	0.00990404599505769	0.22470952784067	0	0	0	0.40671	3.13048	0	18.171966	3.32786	2.791491
ENSG00000165609.12	NUDT5	-1.09489443985367	0.424824737018694	0.00995797966164025	0.225385997628876	20.136329	12.764158	12.829173	29.317786	35.150629	25.28301	63.23419	73.818762	34.96604
ENSG00000273983.1	HIST1H3G	-1.95632532049598	0.759108452419037	0.00996228973791161	0.225385997628876	0.0227301	0	0.0460595	0.177356	0.286967	0.156759	0.283431	1.79649	0.165122
ENSG00000235381.1	AL596202.1	-0.838760794244553	0.325548467827746	0.00998193602380848	0.225442119791381	0.794502	0.25219	0.653144	0.520377	0.836691	0.925042	1.33636	1.31687	0.90764
ENSG00000225964.5	NRIR	-1.49453373558255	0.580089814212535	0.00998398885227591	0.225442119791381	1.00651	0.162323	0.255347	0.588819	2.134233	1.117736	0.818939	1.318736	2.6269
ENSG00000162929.13	KIAA1841	-0.810216184039803	0.31459031693466	0.0100105557420909	0.225824661793457	3.2643083259251	1.66984842031	2.6702173	2.9273342021335	3.4403275	4.285963	8.0175925	6.2362152555	3.450537186185
ENSG00000131409.12	LRRC4B	1.04731375630131	0.406772320212694	0.0100329158020615	0.225894661835092	5.322409	2.3091091	2.62135	1.393403	0.532011	1.866848	1.230880391	2.07302	1.27403
ENSG00000167034.9	NKX3-1	1.53007315570469	0.594216696188973	0.0100257078717072	0.225894661835092	2.30746	7.50994	3.81294	0.510775	0.774799	1.20901	0.7375	0.625287	2.00599
ENSG00000164684.13	ZNF704	1.00604615743134	0.390795680097283	0.0100427658449298	0.225899644763084	6.571083	6.05487	6.711226	2.409109	1.76285	3.256672	2.258942	1.728714	4.417214
ENSG00000197251.3	LINC00336	-1.89129790121153	0.735068016852404	0.0100833932166065	0.225970841514003	0.0263534	0.025467	0	0.0822497	0.291118	0.0259667	0.176981	0.206017	0.406836
ENSG00000231274.5	SBK3	1.74505045590481	0.67830644030198	0.010092089393255	0.225970841514003	0.469666	1.552101	0.277392	0.212922	0.111166	0.370442	0.0451106	0.163268	0.0853224
ENSG00000249252.5	AC098829.1	2.08147070586029	0.809175777823294	0.0101015262990231	0.225970841514003	0.233628	1.985992	0.625996	0.0910983	0	0	0.112616	0	0.271033
ENSG00000226453.1	LINC02542	-1.97937859124329	0.769135257439576	0.0100672240223097	0.225970841514003	0	0.0781566	0	0.315036	1.33797	0.0797161	1.39902	1.05382	0.513831
ENSG00000132680.10	KHDC4	-0.687645120079408	0.267331193112707	0.0101037216123861	0.225970841514003	33.1247088	18.95122024432	27.481509	27.830306	43.8955097	35.302488	60.710008	53.325848	36.61707375681
ENSG00000114251.14	WNT5A	-1.50429639950992	0.584724724912741	0.0100921049687936	0.225970841514003	1.660093	0.282526	1.298241	2.73947400008232	2.640276	3.060998	14.023342	6.013787	3.247089
ENSG00000012211.12	PRICKLE3	-0.870403749804153	0.338623237682273	0.0101575451174973	0.226695334253666	8.527073	3.482121	6.920647	5.080112	13.850167	7.764451	13.010415	11.401367	10.644979
ENSG00000101489.19	CELF4	1.51592247672424	0.59000799643575	0.0101896752947686	0.226695334253666	3.3287283	0.6942092	2.0211994399182	0.3505178	0.2232789	0.92154196	0.50726805	0.1485536	0.5399562
ENSG00000121594.11	CD80	-1.7077662679531	0.66467813837219	0.0101900334106327	0.226695334253666	0.160416	0.2732938	0.228724	0.513955	0.24762	0.883557	1.2343	4.810707	0.5206089
ENSG00000155592.15	ZKSCAN2	1.0279555856156	0.40016226884714	0.0102037540161063	0.226695334253666	1.648923	2.119751	1.75156	0.8051892	0.31411	1.31113	0.8724625	0.566034	0.9647028
ENSG00000185825.16	BCAP31	-0.790960534877916	0.3078342177447	0.0101864001515497	0.226695334253666	112.124545	97.571377	116.399719	98.618225	215.187374	125.322378	233.152077	255.221877	147.983892
ENSG00000142319.17	SLC6A3	-2.06424010259115	0.803099475774867	0.0101598236625797	0.226695334253666	0	0.0129953	0.067957	0.0522628	0.0424599	0.609748	1.03796	0.256976	0
ENSG00000103657.13	HERC1	0.620331190995221	0.241466771283266	0.0101988733140793	0.226695334253666	43.2436147	28.83146	40.8593623	20.388592	14.3019741	31.2200735	22.168545	22.4905511	22.66823
ENSG00000172269.18	DPAGT1	-0.711670014659884	0.277168597071527	0.0102392539924689	0.226743858936134	27.969603	14.253814	20.3678185	24.4003089592	32.441304	28.404847	43.581941	47.295688068493	38.301076
ENSG00000254539.1	AC239804.1	1.17561240947363	0.457822767693535	0.0102336445530988	0.226743858936134	9.8482	7.87892	11.152	2.08978	2.47995	4.00293	3.12705	1.79324	4.77721
ENSG00000163739.4	CXCL1	-1.96418059409376	0.764859076015712	0.0102278481110753	0.226743858936134	5.807052	19.05886	7.495026	23.32972	10.3342	7.443626	171.57682	440.7425	9.711155
ENSG00000115718.17	PROC	-1.95000010788549	0.759504906625192	0.010244597010882	0.226743858936134	0.3634618	0.0350485	0.2220066	1.001434	6.238872	0.1368177	2.97209	4.622897	0.7796685
ENSG00000103034.14	NDRG4	1.27656314442707	0.497367115764271	0.010268868003772	0.227038346640323	15.398330865	4.100691	14.23896594549	3.59328537097463	2.0055299	7.84475900253197	3.36402130160852	2.28179725	2.48258860596415
ENSG00000111011.17	RSRC2	0.541439110212944	0.210975639447291	0.0102772569000479	0.227038346640323	53.839559123216	67.333975	65.803125	42.545525	31.431813	50.80029	47.730922	44.9229391	35.330235198
ENSG00000228013.1	IL6R-AS1	1.61444286162042	0.62931610560965	0.0103059129923231	0.227276151154494	0.613659	1.46717	0.294586	0.2772	0.0509678	0.286465	0.0929885	0.0841752	0.381314
ENSG00000086619.13	ERO1B	0.825150015123977	0.321652945029489	0.0103073963099775	0.227276151154494	5.772215	4.63579	4.8488792	8.078896	3.6000602	3.890343	3.09967	2.790513	3.722766
ENSG00000145244.11	CORIN	-1.61154044218188	0.628452116227084	0.0103383819937458	0.227745333291334	0.216437	0.263279	0.1439869	0.12096463	0.09135535	0.2298631	1.6634226	1.6752794	0.38175816
ENSG00000144468.16	RHBDD1	0.512714595887369	0.200006365056824	0.0103625269364712	0.228063081103706	12.1251410005527	10.293199	10.2258245	6.629456	4.441389	8.506563	8.319962	7.264859	7.839172
ENSG00000100285.9	NEFH	1.52531124807494	0.59607755990031	0.0104999695468786	0.230871401630101	1.86553	0.460712	1.93232	0.197007	0.0664092	0.552627	0.255503	0.304492	0.45848
ENSG00000115295.19	CLIP4	1.41639082977368	0.553583569142739	0.0105099006521568	0.230873388764279	35.108134	42.67261	31.0510466	6.825993	2.1635373	16.577259	5.9691839	9.918012	15.602549
ENSG00000121210.15	TMEM131L	1.1131615811727	0.435284695279744	0.0105482603887602	0.231499286230778	13.464625	16.572344	15.8185488	6.3393212	1.857483	10.838392	4.717156	6.2905171	7.14314744542
ENSG00000129250.11	KIF1C	0.97866146426701	0.383105198604395	0.0106325094654334	0.231518802271396	83.500422	96.191592	103.33335	44.677589	22.350815	59.18895	32.67292	30.628716	66.848051
ENSG00000216490.3	IFI30	-1.45487161530063	0.569497723638086	0.010629233806294	0.231518802271396	60.82129	32.490032	24.846664	112.70299	84.2619	87.14915	226.95272	485.3939	172.207086
ENSG00000178776.4	C5orf46	-2.09978213544084	0.821970515642287	0.0106318709459748	0.231518802271396	0	0	0	0	0	0.133085	4.332701	0.46902	0.638978
ENSG00000148154.9	UGCG	1.07369684248561	0.420543591086437	0.0106763734510489	0.231518802271396	38.153425	76.974402	46.817385	21.1750778	16.211614	21.366562	20.417756	37.93803	14.687808
ENSG00000162188.5	GNG3	1.58945123050801	0.622599652093569	0.0106821996414753	0.231518802271396	5.15707	1.06912	5.00771	0.229876	0.46491	0.799605	0.708621	0.639361	1.13804
ENSG00000140479.16	PCSK6	0.780383979474594	0.305388048045408	0.010607046189818	0.231518802271396	8.97926665525749	5.855585937283	6.26619836163457	6.014570284297	2.917854	3.9486846	7.0703081	4.5358915	2.2968249
ENSG00000178922.16	HYI	0.608058043321907	0.238224250372067	0.0106964967802186	0.231518802271396	80.2194014	67.262021	77.1118237	54.088803	31.266782054246	70.986371	38.578744	52.840409	47.524383
ENSG00000225187.1	AC073283.1	-1.9461237591126	0.761735713711169	0.0106232256553436	0.231518802271396	0.228382	0.147305	0.231711	0	0.971471	0.0751186	2.6309	1.25789	0.138351
ENSG00000153113.23	CAST	0.662742312579779	0.25921899453766	0.0105673693718706	0.231518802271396	113.933777098613	122.581372	94.167009	62.0380578465	43.289604	83.4038879	70.344625	54.160395664342	75.0710572627462
ENSG00000169248.12	CXCL11	-1.84799073084488	0.723854441279271	0.0106803587406902	0.231518802271396	3.10967	0.103649	0.217361	1.58961	2.792	1.16254	9.05769	20.1853	4.414502
ENSG00000273576.1	AC009283.1	-1.23456544841464	0.483424365542853	0.0106556781699811	0.231518802271396	13.7713	4.918	9.1705	7.13056	22.9663	14.1608	54.8358	12.1831	12.93
ENSG00000271121.2	NUDT4P2	1.31640231291066	0.515216468216019	0.0106173447920222	0.231518802271396	14.2198	46.9202	17.148	8.13648	4.34078	13.7024	8.77534	11.6208	4.99075
ENSG00000174428.16	GTF2IRD2B	0.66088211022755	0.258921834673148	0.010697173251873	0.231518802271396	35.5010700084207	38.40721	44.367289	26.1961508735	19.356434	31.375744	22.934737	17.602722648506	27.9215783
ENSG00000118523.5	CTGF	1.28917646356822	0.504304933384343	0.0105778746588089	0.231518802271396	476.953	238.17	347.215	67.9577	63.0476	197.54	155.005	86.8075	42.0081
ENSG00000131724.10	IL13RA1	0.881330950735968	0.345080295270579	0.0106496911200106	0.231518802271396	85.919657	97.44428	76.406707	27.12682	35.808511	44.0300555	44.500552	36.587943	35.396495
ENSG00000204706.14	MAMDC2-AS1	1.36307377814765	0.534140214077401	0.0107136477853752	0.231661650408007	2.36219	1.3813409	1.405123	0.8395654	0.3363791	1.5366475	0.3493936	0.216405	0.3616201
ENSG00000241468.7	ATP5MF	-0.781748530932135	0.30647466531894	0.0107483070362137	0.232197082298904	385.611654002113	344.354887	384.7933	424.080908	524.455483	451.598069	858.00647102719	1085.379972	709.533435
ENSG00000175063.16	UBE2C	-1.9186550708296	0.752305816856842	0.0107609926149799	0.232257265630215	3.1098895	0.176076	1.41169	29.574625	52.926298	25.568367	86.68902	104.743731	78.24214
ENSG00000231764.8	DLX6-AS1	-1.98735438830303	0.779651090999032	0.0108022861219138	0.232854011845488	0.0693198946	0.0128036	0.1041120556	0.0409257	0	0.1107650253	0.618061330041	1.6178431	0.2916943
ENSG00000138639.17	ARHGAP24	1.17763488592144	0.462029558079466	0.0108084914922525	0.232854011845488	13.689531	39.8647303	14.2085496	10.648478	6.4492586	12.15859	6.680204	6.360186	11.942156
ENSG00000100852.12	ARHGAP5	0.850081117043759	0.333643684219844	0.0108382494425635	0.23328089006604	16.50818	25.80422	20.539982170232	10.832376	6.633896	13.393394	14.405671	7.338336	12.14371
ENSG00000167779.8	IGFBP6	1.6568780877892	0.65046453829855	0.0108584089292246	0.233500579182896	120.308152	430.768288	85.484356	25.062063	7.98194	98.80939	42.72422	35.737194	43.831034
ENSG00000186297.11	GABRA5	2.09700936598075	0.823624154627299	0.0108941591035581	0.234054823011516	5.1398136	2.969984	8.263159	0	0	0.2845256	0	0.0220129	0.570204
ENSG00000213453.3	FTH1P3	-1.44986579208123	0.570051770226484	0.0109781614341478	0.235643774388418	0.392609	0.3802	0.2659	0.510166	0.515829	1.03479	1.38828	2.50648	0.951832
ENSG00000266820.1	KPNA2P3	-1.25456599124835	0.493357903988404	0.0109932748269053	0.235752486941523	6.21291	3.65491	4.19613	6.44041	21.3966	13.9446	19.5465	11.015	3.70214
ENSG00000282890.1	AC009975.1	2.03646192760395	0.801337013125336	0.0110431580989668	0.236605965442795	0.442611	0.155511	0.448416	0	0	0.0594594	0.0192948	0	0.0548052
ENSG00000108344.14	PSMD3	-1.62461097517276	0.639454551386405	0.0110656136888815	0.236698920455503	48.455188	51.389401	55.474216	35.47267	141.93486	47.700958	745.051655	71.830441	55.888934
ENSG00000278619.4	MRM1	-1.06651664332956	0.419905907947348	0.0110885959136598	0.236698920455503	3.245199	2.286024	2.537988	3.87018	10.53269	3.97506	7.5691	6.04339	5.558509
ENSG00000105509.10	HAS1	2.02159908976972	0.795754927368746	0.0110700579211646	0.236698920455503	14.300482	29.778768	2.67816855	0.041574651754	0.24498630571403	0.630023490126	2.857484	3.325224	0.0725810103842
ENSG00000285278.1	TFAP2A-AS2	-1.45937368091221	0.574593019274689	0.0110903551858697	0.236698920455503	0.0791201	0.0483806	0.131329	0.189054	0.690519	0.138064	0.317242	0.461779	0.331466
ENSG00000266289.1	AC012213.3	-1.70921172971939	0.673024078770619	0.0110979417970697	0.236698920455503	0.0870722	0.168522	0.0883666	0.135833	0.206029	0.171891	1.00573	0.75742	0.870445
ENSG00000261008.6	LINC01572	-1.73655826099229	0.683926650305905	0.0111138003606634	0.23682186218122	0.0504073	0.0770402	0.0347428	0.351632	0.71220600878627	0.270283	1.515403	0.4945282	0.6062257
ENSG00000123815.11	COQ8B	0.53360606670376	0.210190434074577	0.0111271826081705	0.236891861316052	32.276724	32.133054	36.919959	21.585124	16.69493	30.848821	22.8197662	21.6684767	20.1014312
ENSG00000049768.14	FOXP3	-1.77888557816236	0.701038481664452	0.0111647172045101	0.237475458145976	0.8576322	0.187321	0.270939	1.88073821027	0.88925	1.1275141	4.4716421	14.32692	2.817012
ENSG00000156531.16	PHF6	-0.758259859554067	0.298903314372977	0.0111868780282082	0.237731291141117	4.1021352	1.9492663864701	3.4323154	3.418513	5.8847275	4.304109	7.5565419	6.2834333	4.8748217
ENSG00000164542.12	KIAA0895	0.823893410639515	0.324860344093174	0.0112079849427876	0.237749127253833	3.62026915	6.2569249545	5.97446	3.1959514597	2.53906968	3.5000467069	2.13063137	3.22221679	2.5402379
ENSG00000157077.14	ZFYVE9	0.786938286000458	0.310287047255591	0.0112074804888546	0.237749127253833	9.11519	7.425744	8.89621	3.877727	3.2523695	6.566588	3.5060195	3.4949091	4.8417622
ENSG00000154358.20	OBSCN	1.05626035075953	0.416706601196127	0.011251735484451	0.238072747375456	22.1023678	9.4045025	10.529744	7.74976705	2.8621334	7.798509	3.5468879	5.054326883	9.8693634025
ENSG00000250328.5	MGC32805	-1.98363727727267	0.782603808681233	0.0112555401084049	0.238072747375456	0	0	0	0.0961013	0.0876667	0.138674	0.82230524	0.2732495	0.544122
ENSG00000178623.11	GPR35	-1.71092742740776	0.675248453331478	0.0112841266391674	0.238072747375456	3.692483	1.86719	2.044804	10.6757864	35.711506	2.994138	50.54666	15.164699	9.08493
ENSG00000141750.6	STAC2	1.37227639059119	0.54157270489956	0.0112809646546501	0.238072747375456	0.333774	0.307104	0.289813	0.0744115	0.0773376	0.1931385	0.0761975	0.0414058	0.057726
ENSG00000106780.8	MEGF9	0.833921032957372	0.329105423553148	0.0112800134434628	0.238072747375456	10.1042	9.5926	8.1051	3.24125	2.68598	6.2496	4.88941	4.40058	4.24261
ENSG00000123643.12	SLC36A1	-0.595219127993555	0.234786349471129	0.0112398482773401	0.238072747375456	3.67408	2.64427	3.2925048	4.0765517	3.78039	5.4949255	6.904158	6.8820294	5.2181721
ENSG00000261089.1	CDC37P2	-1.91973205193643	0.757874805221943	0.0113075981656913	0.238286012363668	0.121238	0	0.122956	0	0.526063	0.119579	0.34134	0.737803	0.0883123
ENSG00000090889.11	KIF4A	-1.67761296724224	0.662346976630248	0.0113145483045534	0.238286012363668	0.278668	0.187266	0.269992	2.18386	3.55659	1.39618	7.008196	4.061493	2.53014
ENSG00000269793.6	ZIM2-AS1	1.93899126181627	0.765772054432212	0.0113390162741031	0.23858713973698	0.0260529	0.2119331	0.445641	0.0609839	0	0.0770109	0.0249942	0.0226295	0.0236585
ENSG00000065970.8	FOXJ2	0.805697445364528	0.318287595402871	0.0113624261998912	0.238865484834811	13.297972	15.657338	13.302044	6.620638	4.0316702	10.604583	7.394687	6.121326	8.484249
ENSG00000227440.1	ATP5MC1P4	-1.95241571137659	0.771761827613973	0.0114122234035951	0.239697558882493	0.41483	0	0	0.485277	2.78165	0.410879	2.00942	0.36189	3.96678
ENSG00000196296.13	ATP2A1	-1.60829751064065	0.635880007889067	0.0114307598939738	0.239872144787584	1.3068168	0.437633	0.38121	1.823681	8.263676	1.036291	2.631335	4.972358	2.060842
ENSG00000163507.13	CIP2A	-1.10734932103388	0.437940719121852	0.0114539006344861	0.239890599773056	0.95722538953	0.9690999	1.143822	1.5528203	2.43909426695	1.23818432471606	2.6758161	5.2350497	2.688916745647
ENSG00000198010.12	DLGAP2	1.37634740459404	0.544300134687675	0.0114500427622557	0.239890599773056	0.2245454	0.0638173	0.0823579	0.0610912	0.0200544	0.0921368	0.029223325938	0.03268906	0.023072
ENSG00000279031.1	AC004232.3	-1.54920248727723	0.612749755797645	0.0114623145793272	0.239890599773056	0.463411	0.449067	0.157033	0.843084	2.31403	1.22218	3.13362	1.88428	0.562049
ENSG00000283064.1	AL353759.1	-1.66714760737336	0.659673256158371	0.0114965408561408	0.240392464372478	0.182348	0.117138	0.0625075	0.382001	1.05986	0.28756	0.385087	2.22186	0.4413
ENSG00000158865.12	SLC5A11	-2.02680464638472	0.802292847043274	0.0115282360597847	0.240840557612297	0.0292354	0	0	0.0228109	0.061353	0.0583607	0.5761138	0.025396	0.0530993
ENSG00000226421.1	SLC25A5P5	-2.02416527606729	0.801348733734599	0.0115386540455849	0.240843738935469	0	0	0	0.1687	1.59219	0.0711247	0.415992	0.501485	0.32751
ENSG00000146963.17	LUC7L2	0.593685922364796	0.235129736865197	0.0115721622851232	0.241328443885579	66.516849	70.14019	67.306188	49.4761278	28.04944	64.093353575401	56.323635	36.699887	40.276969
ENSG00000135960.9	EDAR	-2.06085427344224	0.816498426853321	0.0116022979266176	0.241635815696036	0.0122485471	0.012095	0	0.254012	1.5215	0.0246634	4.5658180302943	0.152201	0.48882
ENSG00000284681.2	AC007240.1	-1.96122999199081	0.777124188314143	0.011612626960841	0.241635815696036	0.160404	0	0.0852118	0.990793	1.2616226	0.194399	7.5584395	3.106705	3.31733
ENSG00000272688.1	AP005329.3	1.11125976069005	0.440356523868197	0.0116177997572622	0.241635815696036	2.59154	2.8035	1.90905	4.61461	0.854583	1.60199	0.939612	1.83522	1.99026
ENSG00000265787.2	CYP4F35P	-1.48254623392386	0.587739357044966	0.011653877298599	0.241822408622257	0.693564	0.13917	0.167241	0.918065	1.16015	1.03344	1.36865	3.98832	1.29241
ENSG00000143158.10	MPC2	-0.74562714996991	0.295645719412818	0.011668000791117	0.241822408622257	76.0383	78.98814	84.7514	59.0003	126.9095	102.0751	110.6956	201.03813	124.4566
ENSG00000204899.5	MZT1	-0.896646356106653	0.355397551658241	0.0116378575169299	0.241822408622257	4.95618	2.82261	4.73057	4.96936	6.19668	5.68516	15.7555	7.2161	10.3492
ENSG00000112511.17	PHF1	0.734454289561372	0.291182637556255	0.0116585307386436	0.241822408622257	141.800454	139.039893	124.159083	72.749992	44.8553430008181	109.821332	58.397483	80.244983	81.832115
ENSG00000172340.14	SUCLG2	0.602595155029792	0.238971125733342	0.0116814733580038	0.24184662599601	47.408383	58.155256	57.648774	46.841351	34.6191661	40.913494	32.987028	32.0012782	40.4405247
ENSG00000266601.1	AC018521.6	1.51018120940539	0.59898416133573	0.011694295868987	0.24184662599601	2.80229	3.07273	3.22732	1.64403	0.557001	2.0907	0.342203	0.307011	0.961053
ENSG00000180440.3	SERTM1	1.7076917706662	0.677685659584876	0.0117392274444941	0.24184662599601	0.401118	0.129176	0.101586	0.182576	0.105505	0.04939	0.0320515	0	0.030351
ENSG00000211710.3	TRBV4-1	-1.72342188931744	0.683716910719958	0.0117133014317121	0.24184662599601	1.13186	0.275136	0	0.662985	1.34415	2.80951	1.65238	6.68149	1.03339
ENSG00000148219.16	ASTN2	1.22309065139823	0.485387193710453	0.0117413284604005	0.24184662599601	5.131343	3.3291894	4.8701395	1.189226118329	0.7585071	3.2801329	0.8694302	1.0416435	1.4872552
ENSG00000182489.8	XKRX	-1.86768166368782	0.740873159660346	0.0117048595353523	0.24184662599601	0.113874	0.0916858	0.0440791	0.1677845	0.359422	0.0825203	3.129108	0.1724817	0.1551
ENSG00000130948.10	HSD17B3	-1.77163418789573	0.702992402646018	0.0117310577382593	0.24184662599601	1.0810893	0.686097	0.638402	0.946133	13.189741	2.805529	0.6887553356	1.994069	0.811249
ENSG00000204220.11	PFDN6	-0.81062320333241	0.321975980409758	0.0118140260917484	0.241977342252295	61.255176	57.192977	55.2828	52.805345	77.358801	62.407889	113.13099	171.46541	116.560278
ENSG00000277128.2	AL589743.4	-1.89623723802949	0.752708504525532	0.0117615623243775	0.241977342252295	0.0124615	0	0.2643856	0.1014874	0.3680163	0.0736415	1.642842	0.543253	0.6856674
ENSG00000145242.13	EPHA5	1.87071579655957	0.743182261837038	0.0118301867594468	0.241977342252295	0.142818391186597	0.136275667772	0.1591901	0	0.00491684720174	0.02454298325	0.0149323	0.012605509532	0.0395975656728
ENSG00000013588.8	GPRC5A	-1.80064343284424	0.715267249606224	0.0118210609888545	0.241977342252295	4.462567	18.445362	1.157228	13.133938	98.87976	4.715498	37.049381	99.09617	24.596071
ENSG00000226084.5	AC113935.1	1.66970373041605	0.662868012057042	0.0117719313847965	0.241977342252295	0.821031	1.05415	0.221049	0.799941	0	0.182343	0.181519	0.267214	0.176758
ENSG00000015475.18	BID	-1.1404035139618	0.453018381255968	0.0118243015290827	0.241977342252295	6.854458	6.874026	7.918885	14.171583	24.96514619	16.065602611	43.4752550002783	20.425429	11.4443973
ENSG00000254349.5	MIR2052HG	-2.06974231967749	0.82224809678948	0.0118300067890109	0.241977342252295	0	0	0	0	0.0205997	0	0.479284	0.3260894	0.0711231
ENSG00000235893.5	BX284632.1	-1.2320370284826	0.489190649671874	0.0117848784430059	0.241977342252295	1.32522	0.285335	1.49665	0.918511	3.01859	1.74718	2.70155	3.46343	1.74108
ENSG00000213889.10	PPM1N	-1.62953582147357	0.647705306514948	0.0118742366416005	0.242666782098074	1.195859	0.4466534	0.845218	1.8620037329	6.89415	1.817819	0.823158	2.9377895	9.759723
ENSG00000180745.4	CLRN3	-2.07080423403085	0.823264136757409	0.0118911485782912	0.24280090234577	0	0	0	1.11196	35.6082	0.520532	34.3868	1.83531	1.87013
ENSG00000171658.8	NMRAL2P	-1.7848442978204	0.709932679851878	0.0119335376402748	0.243071036881886	0.3628987	0.2941779560193	0.127964	0.7913515	5.86258	0.383403	1.144531	1.538477462	0.943434
ENSG00000264705.1	AC090337.1	-1.66883819317038	0.663805546814552	0.0119354603166077	0.243071036881886	0.0536349	0.0259157	0.0271739	0.0627734	0.105801	0.105697	0.334474	0.372705	0.0730593
ENSG00000119689.14	DLST	0.686410850572042	0.273014147822782	0.0119304391398193	0.243071036881886	60.753316	69.762201	65.40273	37.4644083	24.705346	56.144905	39.519615	30.436375	40.7286902
ENSG00000197747.8	S100A10	-1.03626164112796	0.412389992146896	0.0119770574917715	0.243495446979593	204.485774	456.49722	236.3355	264.98565	903.18045	514.100863	714.28033	740.410072	436.815
ENSG00000148331.11	ASB6	0.942470453482929	0.375061682554152	0.0119763226274448	0.243495446979593	23.39087	39.0761	19.33836	11.14518	9.684466	9.8606300164799	14.16257	16.1085505	12.14893
ENSG00000259357.2	AL590133.2	-1.58843060193925	0.632396695756256	0.0120129746163934	0.243592391940541	4.3201300335495	7.01172	1.15205	14.32012	23.86536	14.44227	13.80513	69.0808	24.1702
ENSG00000170956.16	CEACAM3	-1.88489247565414	0.750270899638507	0.0119953010738023	0.243592391940541	0.1673597	0.3360106	0.1679959	0.1660816	1.2321101	0.1365759	5.251373	1.0053817	0.0555406
ENSG00000180938.5	ZNF572	-0.851779022036349	0.339097917814898	0.0120084152328179	0.243592391940541	0.849871	0.315796	0.480136	0.510111	0.92855	1.12694	1.56711	0.695436	0.920072
ENSG00000198435.3	NRARP	-1.55317609291437	0.618456629675213	0.0120262102986336	0.243650189824043	9.15482	1.85626	1.00563	4.12093	15.1793	6.62452	20.3055	29.3374	3.43028
ENSG00000106927.11	AMBP	-1.95775250166829	0.779653536653391	0.0120371120515458	0.243660643521412	0	0.128352	0.0853506	0.921453	2.82513105	0.2619475	1.8429878	7.803837	1.2051709
ENSG00000134762.16	DSC3	-1.9722906791279	0.785661009451382	0.0120608697546488	0.243931090787772	0.05248746	0.0144065427	0.166166052	0.0353641318	0.00597909315	1.692244	1.13011	0.019423892	0.452052
ENSG00000215788.10	TNFRSF25	-1.24677161720117	0.496865920954373	0.012098037439203	0.244472055435954	18.700112	2.6490362	6.531636	10.592262	14.5348738287	27.720692	40.012015	38.799169	12.327328
ENSG00000160013.8	PTGIR	1.66278217177343	0.663656861970242	0.0122283658498433	0.244673911226865	11.266223	85.6045678	24.758147	3.077065	2.020006	10.58071	12.374855	11.768588	5.800278
ENSG00000118298.11	CA14	1.42599628049261	0.568818066533466	0.012177925173921	0.244673911226865	5.920397	1.231551	7.771287	1.6326705	1.1472156	2.11702	0.7031986	0.5037486	2.0466431
ENSG00000267013.5	LINC01929	-1.89800187919639	0.757194871020367	0.0121890731604738	0.244673911226865	0.133571	0.0338717	0.0177581	0.0410337	0.346034	0.103606	0.517108	0.567255	0
ENSG00000285476.1	AC139491.7	1.95617902743901	0.780518513883332	0.0122017321069749	0.244673911226865	4.78089	1.49256	0.0377174	0.071411	0.233851	0.385062	0.0153119	0.280703	0.0358457
ENSG00000156509.13	FBXO43	-1.68223295575262	0.671069295711934	0.0121831449826705	0.244673911226865	0.0561317	0	0.123659	0.1072384	0.0550403	0.274844	0.317708	0.3785850380894	0.6996827
ENSG00000231177.4	LINC00852	0.821322254928062	0.327694640082874	0.0121979756254988	0.244673911226865	1.738633	1.767182	1.581803	1.73797	0.562411	1.538233	1.155951	1.31634	0.647894
ENSG00000214078.12	CPNE1	-0.886234527165483	0.35370383814391	0.0122249503418667	0.244673911226865	164.767932	91.186795	120.99039723872	115.363062024	209.153101	162.692345576	306.6482069	410.933053067237	143.266150690378
ENSG00000196850.5	PPTC7	1.06395128017459	0.424672433508354	0.0122331741131713	0.244673911226865	12.0823	34.2034	24.1782	8.8228	6.34683	13.6023	8.70855	11.7188	8.46757
ENSG00000197106.6	SLC6A17	1.5079895300329	0.601326194116752	0.0121494726043218	0.244673911226865	0.92055	0.405377	0.261575	0.157446	0.1161423	0.0397409	0.293937	0.154157	0.0293102
ENSG00000198300.13	PEG3	1.56118151397289	0.622924397360869	0.0122031920515215	0.244673911226865	7.352893199596	1.94160010725294	7.04521150956014	0.617912322435	0.6262894	2.073029243205	0.513664375011	0.40428688375778	2.03970620728
ENSG00000267940.1	AC022762.2	-1.39260508696593	0.555231868477369	0.0121364964072427	0.244673911226865	0.610202	0.547803	0.30929	1.08819	3.30132	1.50388	3.55773	1.21202	0.870953
ENSG00000182963.9	GJC1	1.68519044791063	0.67220011723907	0.0121768524885076	0.244673911226865	21.986835	67.391375	34.181751	2.3818649082	1.18269894051	15.302379	5.3482650904124	5.18233	12.883008
ENSG00000142945.12	KIF2C	-1.40864703503505	0.562442891543298	0.0122619173710282	0.24483135612059	1.864074	1.0617509	1.1106978	5.4044774	5.9263952	3.172466	9.68096	10.3050959	11.9291212
ENSG00000272953.1	AC092171.4	-1.43571006325436	0.573242938730758	0.0122610623345628	0.24483135612059	2.25765	0.225165	0.354264	1.81354	3.75938	2.98653	5.60459	4.04852	2.4313
ENSG00000204839.8	MROH6	-1.57294775992739	0.628245809204861	0.0122897370812579	0.245083324940488	7.34840945	6.635535	5.02467379	15.0231265211	52.213749	7.9355041	8.479112	68.422146	29.092207
ENSG00000273373.1	AL355488.1	-0.951353234369433	0.380001686911074	0.0122954295833491	0.245083324940488	3.56537	1.00778	1.84444	3.09274	3.95065	3.77384	6.16536	5.41856	5.90657
ENSG00000204071.10	TCEAL6	2.04111307940172	0.81570978735746	0.0123405353049596	0.245773598293426	2.16972	12.851755	1.906802	0	0	0.821192	0.0534976	0.494764	0.57216
ENSG00000177551.5	NHLH2	2.01856953552118	0.806844997166516	0.0123561663439737	0.245821704361176	0.1773668	0.0210035	0.0660696	0	0	0.0140883	0	0.0124203	0.00649418
ENSG00000182327.7	GLTPD2	-1.68827239507773	0.674881320056542	0.0123639065319546	0.245821704361176	0.188502	0.236241	0.185781	0.486474	2.65585	0.556839	0.528246	2.40217	0.289828
ENSG00000267412.1	AC092068.2	1.62890626286415	0.651372286800216	0.0123937603041733	0.246206613459957	0.633191	0.128843	0.641714	0.858066	0.131474	0.459809	0.0319846	0.0868566	0.0907975
ENSG00000157851.16	DPYSL5	2.04037363196999	0.816077754812944	0.0124116328638412	0.246353061437038	0.5915030119861	0.18717200114085	0.80569600179465	0	0	0.08035110192982	0	0.121497	0.00925926
ENSG00000163975.11	MELTF	-1.49090781778556	0.596587105141876	0.0124522727248594	0.246472664888871	1.8741837	2.1543013	1.488526	2.4764864	7.461389	4.488122	21.756439	2.395519	1.751631
ENSG00000132872.11	SYT4	1.87646322382425	0.750735982547022	0.0124369337104511	0.246472664888871	0.9634655	0.397337	1.69255	0.732157	0.243423	0.413807	0.0123221	0	0.0933625
ENSG00000163602.10	RYBP	0.897271763641403	0.359073787293164	0.0124596811968033	0.246472664888871	10.8969	17.9086	10.7677	4.88603	4.07049	6.08157	7.44269	6.58687	6.75804
ENSG00000100650.15	SRSF5	0.818341879507302	0.327471473479181	0.0124554327295878	0.246472664888871	447.664855	579.545205	533.442096	223.475479	168.575067	413.118848	242.441399	257.873702	239.252850713069
ENSG00000103490.13	PYCARD	-1.49446440967986	0.598339878899833	0.0125007296140741	0.247026761855705	16.767434	7.8631076175	9.0719362	42.2876	113.3415	20.83744	76.9364	85.1127	47.229767
ENSG00000170775.2	GPR37	1.80796399379466	0.723921863504161	0.0125087503978764	0.247026761855705	2.38724	2.09988	1.51601	0.15291	0	0.157944	0.375835	0.293949	0.663228
ENSG00000158869.10	FCER1G	-1.22234559772106	0.489795844566034	0.0125736283225357	0.248099153973935	59.42096	36.329217	29.449407	41.090952	25.018949	61.389959	168.58562	210.33723	118.61492
ENSG00000138166.5	DUSP5	1.54173681361487	0.618090717339354	0.0126186764207455	0.248778796224462	64.8195	103.039938	17.789306	15.7221	7.23458	11.72198	17.6895	35.9253	3.65932
ENSG00000160211.17	G6PD	-0.959039989134955	0.3846026261169	0.0126459700109104	0.249107558711981	18.078904	14.303346	13.130389	24.189283	41.3469	24.2402	44.582363	53.15703	24.625639
ENSG00000126218.11	F10	1.47362448183804	0.591066895992818	0.0126611694129084	0.249197731204903	11.87619	28.904079	7.689845	3.015969	2.922957	5.61622	9.051374	2.323244	1.576815
ENSG00000213366.12	GSTM2	1.18680400104634	0.47654435035976	0.0127585872863046	0.250904623909466	194.797228	185.916908	230.7810888	76.3540089	26.725885	148.046095	39.59312	56.4981779328658	100.55079
ENSG00000117477.12	CCDC181	1.34143409584946	0.538774054594159	0.0127818698944933	0.251151967834764	2.626374	3.676756	3.2797894	0.44990984	0.6814397	1.4379796	0.8389496	0.382051	1.2362889
ENSG00000231312.6	AC007388.1	0.845472282875549	0.339792540522373	0.0128390993963647	0.252065364801768	31.51143	28.661907	22.028367	11.1481459	8.8997897	20.9839889	11.2626736	11.6522328	13.5754607
ENSG00000106278.11	PTPRZ1	1.6255505485085	0.653651488403939	0.0128870114579586	0.252607383968837	3.957078	4.1607839	6.648553	11.427009	3.0530966	2.172998	0.138977	0.6830277	2.19365
ENSG00000145777.14	TSLP	1.54244534572591	0.620242456238842	0.0128882417037082	0.252607383968837	2.00025	6.083142	1.7042	0.461125	0.735353	0.895766	0.479653	0.256642	1.34162
ENSG00000196182.10	STK40	1.34964523670438	0.542870577978763	0.0129141846069165	0.252904578516584	65.815993	173.326748	67.958545	14.987756	23.119902	49.796203	23.219931	21.645111	30.91523
ENSG00000127423.10	AUNIP	-1.03183067427196	0.415103802485424	0.012929065197354	0.252984819512196	0.5765324	0.499519	0.5867643	0.8994945	1.59363	0.777625	1.796758	1.677092	1.6679923
ENSG00000076382.16	SPAG5	-1.45472438257741	0.585685127800333	0.012998900193493	0.253098480634375	4.910265	6.47402573824	2.6955577	13.317149	34.87342592	5.133218	25.183093	29.981343	24.604599
ENSG00000167046.4	AL357033.1	-1.83547175778461	0.738983170144213	0.0129996022831261	0.253098480634375	0	0.0280258	0.0293863	0.113133	0.228816	0.171455	0.890413	0.075572	0.10534
ENSG00000173714.7	WFIKKN2	1.74613041046571	0.702836273348643	0.0129767889814469	0.253098480634375	1.66139	0.343933	0.69121	0.0393505	0.0351156	0.336057	0.0426664	0.0438048	0.228967
ENSG00000279077.1	AC023090.2	1.22297785788598	0.492280221241264	0.012980188054363	0.253098480634375	0.26312	0.33055	0.319937	0.246362	0.124569	0.0777775	0.0504863	0.159983	0.167258
ENSG00000157404.15	KIT	1.15697097946767	0.465654553684433	0.0129692635562369	0.253098480634375	14.797815	18.951461	14.185566	4.4399801	2.798615	10.153687	3.19761	8.098228	4.894167
ENSG00000109861.15	CTSC	-1.29948930231252	0.522982629933104	0.0129636724904765	0.253098480634375	46.864086	34.778524	23.582871	93.839021	101.587328	94.406156	119.297616	344.045162	108.026589
ENSG00000274956.2	NKAIN3-IT1	1.68378395390408	0.678053690955279	0.013018584151103	0.253257879576308	0.675979	0.6955	1.07902	0.0850197	0.0811734	0.441379	0.0391719	0.0255162	0.160099
ENSG00000179051.13	RCC2	-0.98017194585603	0.394937382310338	0.0130705436253604	0.253847701982269	16.350476	13.9766	12.0228	23.8854912	31.9029	20.7956	44.973658	58.8900346	28.7211052
ENSG00000172869.14	DMXL1	0.552654928578702	0.222661593723292	0.0130632698477128	0.253847701982269	14.160999	12.623208	13.977023	7.911098	6.8651138	10.627731191	7.284105	9.672961	8.6399969
ENSG00000170498.8	KISS1	-1.99807625868218	0.805282745574401	0.0130936907016919	0.254086912781137	0	0	0.216406	0.538834	7.22187	0.210543	1.031126	0.371622	1.937119
ENSG00000188730.4	VWC2	1.89244561660312	0.762911087870382	0.0131176720952731	0.254341904981159	0.792424	0.476694	0.816252	0.0459344	0.0142931	0.0758001	0.00433893	0.0117929	0.287763
ENSG00000153922.10	CHD1	0.959810750462706	0.387014756361162	0.0131368907029943	0.254504205435962	36.733161	63.510956	34.464955	14.491336	12.597977	21.468982	24.516492	21.2707160792097	19.231754
ENSG00000129315.10	CCNT1	0.653127704353329	0.263425432487854	0.0131616673452405	0.254773826391656	9.19363	11.521347	10.648176	5.427369	5.649142	6.914273	6.541026	6.16585	5.0890761
ENSG00000116044.15	NFE2L2	0.629121173747422	0.253778975408096	0.0131746803241432	0.254815478223185	71.344782	92.147757	63.653847	51.2437054	35.584322	46.488788626912	60.658999	58.671014	38.108354
ENSG00000242268.2	LINC02082	1.79015429519524	0.722745112378626	0.0132535744896889	0.256130239787967	1.08353	0.381381	0.0999962	0.537779	0.155373	0.194522	0.0948713	0.0857078	0
ENSG00000173575.20	CHD2	0.763762902242476	0.308449592033671	0.0132813261717127	0.25645530313955	48.511970009	96.5133381	59.35483344	48.3017578	32.128506	49.3136503	46.159845	38.284563427	32.4971402
ENSG00000100580.7	TMED8	0.490398879836726	0.198133748402684	0.0133202565675795	0.256995509319065	5.38759	4.01318	5.87245	3.80586	2.31659	4.90737	3.64526	3.64751	3.47744
ENSG00000102100.15	SLC35A2	-1.24800535147892	0.504298321939967	0.01333345923758	0.257038855524128	12.515453	8.69706	7.65955	18.964525	49.903972	10.5368	34.40092959	36.136606	31.134833
ENSG00000134201.11	GSTM5	1.50372137897507	0.60786861278505	0.0133699282796162	0.257319021630907	40.422303	27.7387916	26.499111	4.2462737	2.0108102	19.76259	3.69794500021154	3.6937867	8.550314067833
ENSG00000182993.4	C12orf60	-0.872980178605354	0.352876514880746	0.0133648193280184	0.257319021630907	0.5338644	0.305509	0.522879	0.4077816	0.462503	1.308153	0.7987572	0.824761	1.06237
ENSG00000229127.1	AC007038.1	-0.956787557559264	0.386889369281342	0.0133974310186319	0.257636991088625	0.377109	0.364413	0.382104	0.372708	0.872839	0.495415	0.96471	0.567752	1.00451
ENSG00000108219.14	TSPAN14	-0.744394494601877	0.301129650496502	0.0134357021941262	0.257653419179023	21.390978	8.461644	18.0303283	15.853029	22.41303	34.878611	36.709123	31.889991	17.942262
ENSG00000168994.13	PXDC1	1.37190719764119	0.555469977469776	0.0135183544408104	0.257653419179023	71.662875	210.79799	57.548564	19.70701	19.362517	48.466657	20.03314	37.02089	39.166038
ENSG00000236039.2	AC019117.1	-1.98870780575063	0.804276276225146	0.0134108853267712	0.257653419179023	0.119465	0	0	0.0621388	1.520077	0.0392527	0.255036	0.521925	0.239381
ENSG00000277837.1	AC090340.1	-2.02591172559276	0.820372100540891	0.0135300717117154	0.257653419179023	0	0.0101562	0	0	0.116154	0	0	1.08634	0.582305
ENSG00000009765.14	IYD	-2.02104251953353	0.817885288884758	0.0134713722124575	0.257653419179023	0.0637833	0	0	0.5041389	5.068448	0.1025168	5.288857	1.704265	0.5395672
ENSG00000109919.9	MTCH2	-0.622004483289354	0.25186207350469	0.0135255340466753	0.257653419179023	47.231354	36.772427	46.78726	37.4712	54.64032	49.98976	81.66096	65.73184	91.561856
ENSG00000223549.1	MTND5P28	-1.59250968703965	0.64478042143312	0.0135170442355313	0.257653419179023	0.144204	0.0348472	0.109617	0	0.256003	0.17766	0.242237	0.469829	0.163709
ENSG00000102048.15	ASB9	-1.01578095042572	0.411139050836553	0.0134867511027114	0.257653419179023	1.709307	0.4221017	1.43965	0.942905	1.92328990087	3.4746388	3.207965139199	2.969682	1.15868
ENSG00000237276.8	ANO7L1	-1.33854794266193	0.541971144757381	0.0135197250270279	0.257653419179023	2.6140835	1.2989062	2.5712306	1.0944453	10.706142	3.8262	4.1421586	3.535951	4.106937
ENSG00000281468.1	AC006504.8	-1.40341321455376	0.567867040423592	0.0134594061056481	0.257653419179023	0.923778	1.56527	1.28999	0.900527	6.9206	1.25479	5.56573	2.91489	1.67967
ENSG00000008300.16	CELSR3	-1.40421057853416	0.568169302281431	0.0134560699994278	0.257653419179023	0.9789446	0.4260763	0.7580786	1.733549	2.178177	0.8517233	2.6335583	7.51403	3.266024
ENSG00000102384.13	CENPI	-1.06736039510565	0.432077972082756	0.0135001373444459	0.257653419179023	0.541631	0.583615	0.590947	1.099146	1.703023	0.92752	2.7239975	1.399382	1.7478077
ENSG00000249626.1	AC024560.2	-1.53588575313445	0.622203695923023	0.013569531848362	0.257911435628915	1.04867	0.168738	0.657398	2.11884	6.83885	1.73781	5.02214	2.27522	2.78868
ENSG00000267395.5	DM1-AS	-0.968704159562353	0.392432651601534	0.013569595561129	0.257911435628915	1.912434	0.673968	1.384133	1.84381	3.038962	3.23955	2.955644	2.77538	3.978296
ENSG00000146410.11	MTFR2	-1.41693038659425	0.57405695613093	0.0135766004433618	0.257911435628915	0.601209	0.768169	0.859032	2.542951	5.405401	1.0819337	5.71292	4.436711	4.10235
ENSG00000184524.5	CEND1	1.53101252131939	0.620442774962058	0.0136017366337365	0.25797117474866	3.64169	1.17332	4.00719	0.378848	0.164192	0.99128	0.233025	0.572509	1.25995
ENSG00000212978.6	AC016747.1	-1.01436018270589	0.411060484637629	0.0135996962433258	0.25797117474866	2.03705377	0.749638	1.647504	1.659111	1.2208192	3.754308	5.249299	5.114542	2.428585
ENSG00000173041.11	ZNF680	-0.902999535974618	0.366343896383383	0.0137053096900675	0.258157606709736	2.509255	0.906057903	1.958112	2.2636295	2.956837	3.5334334	5.195346	5.682939	2.359088
ENSG00000205084.10	TMEM231	0.894143778170847	0.362877172487637	0.0137380873903144	0.258157606709736	9.8452633	8.6697176	9.875911	4.205395	2.3432188	7.829098	4.6662758	2.928296	4.8683916
ENSG00000255112.2	CHMP1B	0.818028104804162	0.331767776970146	0.0136759276374756	0.258157606709736	68.0677	38.0644	40.8595	18.3691	16.8781	21.7734	21.3012	32.975	23.7873
ENSG00000112964.13	GHR	1.54017654701294	0.62448895621562	0.013651728784485	0.258157606709736	8.6895430104999	6.85298038667596	8.29880354419313	0.87653742	0.3471199	4.13877900973381	0.971514	0.86992982935996	2.67176
ENSG00000002933.8	TMEM176A	-1.27697345530384	0.517905217365086	0.0136764561976027	0.258157606709736	60.212333	68.47676	51.004495	66.228634	121.50836	86.197483	526.20654	119.96314	81.722109
ENSG00000150995.19	ITPR1	1.1310269260928	0.458882620964568	0.0137112224990628	0.258157606709736	51.0947814415107	44.3782817486591	31.7786706456747	10.6935438399868	8.2476502	30.8100458218863	10.5468932	12.7974446050285	14.7680332
ENSG00000275688.4	CCL15-CCL14	-1.87307461849103	0.760199036281689	0.0137424254721662	0.258157606709736	0.772736	1.363571	0.216138	2.82557	17.495051	0.796942	25.055138	4.50161	0.470364
ENSG00000260686.1	AC008669.1	0.913199730565115	0.370291028301809	0.0136567423170147	0.258157606709736	2.21045	2.70075	2.78038	0.971398	1.00239	1.42693	0.950592	0.860675	1.4997
ENSG00000169181.12	GSG1L	1.7640664505309	0.715801307456047	0.013721840212423	0.258157606709736	0.4237545	0.0998879	0.0755573	0.2979363	0.0407484	0.1018563	0	0.0897823	0.00967554
ENSG00000229153.5	EPHA1-AS1	1.5109529831996	0.612703173447495	0.0136614552405853	0.258157606709736	1.122127	1.513376	0.8135699	0.858702	0.0329251	0.637266	0.1709032	0.6701152	0.3476032
ENSG00000097007.17	ABL1	1.20494258693088	0.489039612506015	0.0137436107062981	0.258157606709736	71.66216	88.66812	97.2128	14.894666	14.524439	49.131698	25.892015	18.691365	34.879823
ENSG00000171631.14	P2RY6	-1.49430595024782	0.606057333848525	0.013677706581899	0.258157606709736	2.48430925	2.696827	1.567861	1.84162461897057	0.835814	3.8621716205	15.105225	18.103327	4.032862
ENSG00000267892.1	AC022144.1	-1.78575345456257	0.725168405406314	0.0137958242782779	0.25883300933754	0.582668	0.140804	0.0738198	0.710332	3.79279	0.215357	0.699142	4.746	0.859928
ENSG00000272822.1	AC073610.3	1.84258088086833	0.748291059690995	0.013801632269778	0.25883300933754	1.64084	0.438646	1.7816	0.164786	0	0.359599	0.140871	0	0.361959
ENSG00000267405.1	AC005180.1	1.76848675386128	0.718311297166719	0.0138162339137245	0.258874998972152	5.58052	34.3145	9.75695	1.21443	0.716341	6.41296	0.375608	2.0341	4.24832
ENSG00000174373.16	RALGAPA1	0.713651042927022	0.289895333063837	0.013825939802741	0.258874998972152	18.019874	18.613004	19.117558	10.6476982	6.4951776	17.5210962	9.7062828	9.25961846	10.3811299
ENSG00000167654.17	ATCAY	1.84057077943247	0.747755339003101	0.0138372350491902	0.258879881570216	1.1795384	0.229275	1.0046882	0.0563681	0.00814339	0.333372	0.00989175	0.0896014	0.103065
ENSG00000275342.4	PRAG1	-1.40265213938509	0.570101500542092	0.0138799604124806	0.259472311742795	1.947335	0.710881	1.135296	4.296878	8.61518	3.73093	5.04654	4.14841	11.44446
ENSG00000233017.2	AL121832.1	-2.00987431406897	0.817350688290774	0.0139320358149385	0.259624252856331	0	0	0	0.337541	0.910775	0	5.004945	2.928659	0.524954
ENSG00000106993.11	CDC37L1	1.09621232466713	0.445748286487571	0.0139222536992857	0.259624252856331	11.376833	21.134065	16.912935	6.497337	3.42286	11.851947	4.092568	5.303819	8.45971
ENSG00000227388.2	AL133410.1	-1.30911824105041	0.532377693831568	0.0139323530261336	0.259624252856331	1.435046	0.676499	1.272291	2.525292	4.724514	1.668346	8.69907	3.753331	3.9071
ENSG00000257596.1	AC078778.1	-1.48225047982582	0.602642612262304	0.0139097915437548	0.259624252856331	1.12684	0.636192	0.190631	0.878889	2.22184	0.927068	2.35089	6.04559	1.1095
ENSG00000189320.8	FAM180A	1.78450986687122	0.725840306963008	0.0139501929769586	0.259655048129418	2.370649	11.86953788	0.878228	0.20575	0.148784574	1.46866928	1.503053	0.6544444	0.444797
ENSG00000143184.4	XCL1	-1.43024007384679	0.581779090638184	0.0139561406458035	0.259655048129418	0.129189	0.208163	0.523844	0.436774	0.339763	0.849037	2.9723	1.0852	0.860499
ENSG00000274976.1	AC087588.2	-1.96865091612904	0.801001067815575	0.0139815059164426	0.259915847562241	0	0	0	0.516411	1.39326	0.218666	3.85076	3.65932	0.402103
ENSG00000106003.12	LFNG	-1.46758377252309	0.597195238250857	0.0139923155650275	0.259915847562241	7.693083	3.182801	3.067574	26.844824	25.702712	27.102147	62.7504444	36.816744	44.901284
ENSG00000255737.2	AGAP2-AS1	-0.80158070413266	0.326282594078631	0.0140217029616581	0.260255674986915	4.26481	2.24835	3.74553	3.77458	3.13919	5.37784	9.34595	7.90093	8.039
ENSG00000254548.1	AC105219.1	-1.90616524899819	0.776017659672635	0.0140359267478734	0.260313737100283	0	0	0	0.696071	1.06595	0.442546	3.48567	3.51291	2.44096
ENSG00000172818.9	OVOL1	-1.9890293253402	0.809908050326658	0.0140543775793232	0.260450041381123	0	0	0.282835	0.5511034	4.214456	0.1573256	7.488561	0.8659777	1.55903
ENSG00000160161.9	CILP2	-1.52310525657129	0.620325513151488	0.014075441704746	0.260634520785356	0.11310724873	0.10926347237	0.15275689887	0.05883803465	0.08925216448	0.3342048353	1.36139	0.2728067905	0.14833679166
ENSG00000125851.9	PCSK2	1.82775465839722	0.74456837152814	0.0140969193668538	0.260826360619683	2.010255724	3.2914987	8.3176584	2.0140214	0.448489	2.48174300030125	0.06969978810008	0.0210363	0.5748516
ENSG00000237863.2	AL035425.1	1.93418280784572	0.788151065163555	0.0141247028843774	0.260928861708959	0.4185007	1.4919512	0.162282	0.998895	0.042089	0	0	0.0677023	0.4288312
ENSG00000248469.1	AC139491.1	1.83501804310508	0.747715284652629	0.0141211455125372	0.260928861708959	0.634333	0.206734	0.108398	0.0893844	0.075333	0	0	0.0331801	0.10405
ENSG00000224533.4	TMLHE-AS1	-1.3276299438934	0.541690297258027	0.0142498662920815	0.262003737201703	0.13474	0.0878481	0.136437	0.105143	0.475198	0.170296	0.387233	0.483175	0.199657
ENSG00000134955.11	SLC37A2	-1.25360662769401	0.511476303126512	0.0142476816082736	0.262003737201703	3.302478	0.6328058	1.19192	2.298084	1.671072	4.263352	11.2852023	5.525514	4.209455
ENSG00000265298.1	AC132812.1	-1.29114240084864	0.526771194871809	0.0142440268136637	0.262003737201703	12.5023	6.68174	6.11383	9.97867	44.6105	16.6203	31.0066	22.4744	6.33364
ENSG00000278698.1	AL162574.2	-2.01712606954799	0.823101633994475	0.0142602360216666	0.262003737201703	0	0.106415	0	0	0.0866826	0	2.96602	0.860996	0.299767
ENSG00000220848.5	RPS18P9	0.696777605343263	0.284189181273677	0.0142140069682045	0.262003737201703	6.76623	7.12891	5.67586	6.374485	2.431773	4.54735	3.943099	5.016234	5.553951
ENSG00000204758.7	AC008429.1	1.56399638878924	0.638204499932757	0.0142610618646509	0.262003737201703	1.910426	4.272826	1.133451	0.224529	0.2533783	0.884757	0.315341	0.3146335	0.929542
ENSG00000197757.7	HOXC6	-1.95323584638095	0.796945702873813	0.0142498729451071	0.262003737201703	1.37686	0	0.0332232	0.0511561	3.167236	0.12922909	7.532678	2.659488	2.72881
ENSG00000146278.10	PNRC1	1.09133774963551	0.445487605222531	0.014295143182747	0.262219197975314	173.2491	197.52919	280.7502	49.27622	35.36706	97.27884	96.40657	118.65261	64.68977
ENSG00000264608.1	AC005726.3	-1.4083587539254	0.574841460390687	0.0142858163822194	0.262219197975314	3.10527	1.88178	1.97492	5.14589	19.746	4.41965	6.01271	9.81718	6.53737
ENSG00000272405.1	AL365181.3	-1.92897645397902	0.787740269595745	0.0143354187365634	0.262752546076964	0.184339	0	0.0336938	1.38848	6.10205	1.47257	6.7111	1.16977	3.85433
ENSG00000227456.7	LINC00310	1.37893491584131	0.56321776672143	0.014352582551583	0.262861779268298	1.8474239	1.6212386	1.0778481	0.2108474	0.2214041	0.3968677	0.3250626	0.4617184	0.6196291
ENSG00000172232.9	AZU1	1.38519995055419	0.565999036839555	0.0143909456066301	0.26325880372507	0.1419639	0.79818	0.525616	0.5296349	0.0559816	0.294614	0.2048095	0.1771368	0.21116
ENSG00000102837.6	OLFM4	-2.01292403003982	0.822538414614716	0.0143967028336074	0.26325880372507	0.465857	0.108023	0.64185	38.4291	99.8832	0.532342	45.0315	600.02	494.577
ENSG00000226468.2	AC018641.1	-1.75701289118426	0.718062282764535	0.0144098443327197	0.263293892437646	0	0.0815708	0	0.19726	0.332448	0.249601	0.973537	0.293295	0.459649
ENSG00000276144.1	AC233309.1	-1.48486906359966	0.606995138107728	0.0144346114288519	0.263541181892836	0.765175	0.344073	0	0.250724	1.10583	1.90157	1.07732	0.510057	1.25153
ENSG00000214456.8	PLIN5	1.4958652431773	0.611926414441814	0.0145045771502402	0.264230214262393	3.2219603	15.1874476	17.499169	9.184844	7.423437	3.4968951	1.3080415	1.6245922	2.2018019
ENSG00000284294.1	AC007326.5	-0.7816885449998	0.319760696569239	0.0145010929437906	0.264230214262393	9.21595	5.11480000209206	2.93046	5.00393	8.40786	10.158144	10.0496	12.8847	9.45422
ENSG00000248724.6	NPHP3-AS1	1.95789640887434	0.800946185002148	0.0145061385264892	0.264230214262393	0.061998	0.301437	0.0599338	0	0	0.0186085	0.0208941	0.0163873	0.0169969
ENSG00000225329.3	LHFPL3-AS2	-1.90914751299712	0.781161692277435	0.0145260276635278	0.264387226543077	0.1002905	0.0892846	0	0.598307	3.50277	0.464198	0.2145833	3.53407	0.483519
ENSG00000168903.8	BTNL3	-2.00989641985307	0.823270140036332	0.0146321770565702	0.264871940699278	0.246794	0	0	0.178243	11.1537	0.0884161	4.0136	3.65183	0
ENSG00000019505.7	SYT13	-1.76357224928634	0.722452580080121	0.0146429780097593	0.264871940699278	0.182976	0.272655	0.658944	2.4748	12.4253	0.630717	4.7354	4.29826	2.63035
ENSG00000227220.1	AL133346.1	1.42156321856176	0.582054456514268	0.0145932063999724	0.264871940699278	12.2415	3.85722	7.51797	1.06703	1.63641	2.58725	3.6593	1.49744	0.471122
ENSG00000176919.12	C8G	-1.69238731923654	0.693170590212578	0.0146257266287499	0.264871940699278	0.978142572	0.168822	0.750601	2.502893	9.327118943	3.77103336	0.874344	10.47135027	2.762582
ENSG00000095397.13	WHRN	1.55016444608134	0.634780121053269	0.0146041460240444	0.264871940699278	17.464954	73.43592	21.99936	5.017333	2.148679	11.144025	4.112105	13.15434	13.670619
ENSG00000197343.10	ZNF655	0.796620120006405	0.326329842892288	0.0146405692536011	0.264871940699278	45.577884	74.3521913	57.194403	38.337405674299	22.7680066	46.1714891	43.04161	20.6252539	32.2823778393
ENSG00000172057.9	ORMDL3	-1.308818647166	0.535967553698748	0.0146072124601856	0.264871940699278	49.885496	41.88031	37.3606517	70.990328	101.6932768	61.0269755	447.524516	103.200496	80.9731008
ENSG00000278828.1	HIST1H3H	-1.56240195201925	0.640030025708964	0.0146410375304857	0.264871940699278	1.06614	0.70287	0.491325	1.02084	4.39695	0.860055	1.7689	8.08655	0.660292
ENSG00000134917.9	ADAMTS8	1.87775446874396	0.769407217477054	0.0146660933845763	0.264968697761153	100.1221	55.5437	43.1707	1.067558	0.311417	14.39251	0.658475	4.65742	17.47895
ENSG00000075391.16	RASAL2	-0.598070864480465	0.245113333860748	0.0146882024378346	0.264968697761153	3.328951	2.3646421	3.80778346	2.1148394	3.6123981	5.4966753	6.673019	4.487949	3.248714
ENSG00000140678.16	ITGAX	-1.4816999692428	0.607292675778421	0.0146935668545234	0.264968697761153	10.856566	12.9160799	6.0024235	6.4865812	5.290968	11.395348	87.782631	56.4040968	15.705865
ENSG00000134215.15	VAV3	-1.47606466499803	0.604926316427299	0.0146842745264689	0.264968697761153	1.10313178679189	0.18243	0.585029	1.4353098	1.2864194	1.389972	8.7130768	2.808063	1.7141877
ENSG00000231081.1	AL078587.1	-1.77907750511027	0.729258962299519	0.0147047970881472	0.264968697761153	0	0.142251	0	0.228959	0.463045	0.290344	1.27592	0.895301	0.534152
ENSG00000168852.12	TPTE2P5	-1.51287406550199	0.620534117047729	0.014767991318853	0.265699267125469	1.090145	0.4710193	1.185607	0.1380765	1.7667182	1.266553	7.914474	1.1972168	1.5817075
ENSG00000259065.1	AC005520.2	0.896635700218932	0.367762946989683	0.0147654820683531	0.265699267125469	3.23122	2.660231	3.47021	1.921316	0.702762	2.59515	1.696444	1.407346	1.434318
ENSG00000102466.15	FGF14	1.50234518889047	0.61649315484922	0.0148129102548844	0.266303208804478	1.74519	1.228307	2.877271	0.2161617	0.0603277	0.7313918	0.59382	0.282912	0.65159
ENSG00000255666.6	AP000943.2	-1.99498176555584	0.818864392747782	0.0148392519898911	0.266368547004464	0	0	0	0	0.6428918	0.0387852	0	0.841868	0.0178747
ENSG00000244607.6	CCDC13	1.37298696510412	0.563557472371501	0.014838962501732	0.266368547004464	4.4811576	2.908675	4.6939937	0.7674694	0.3467346	2.755153	0.5997604	0.814603	1.149432
ENSG00000196421.8	C20orf204	-1.36803562815105	0.561680767598124	0.0148666792171471	0.266656851004196	0.828467	0.3057096	0.3248716	0.472054	0.96926762	1.205259	0.99368	3.915124	0.402602
ENSG00000162782.15	TDRD5	-1.94429817358628	0.798382798940811	0.0148796256921501	0.266685178276191	0.0313119	0	0.0317317	0.6511608	4.712691	0.154284	1.6271850619077	1.4481248	1.1658773
ENSG00000218073.1	AL021407.3	-1.94013103687134	0.797348466084165	0.0149648523703503	0.268007940046404	0.350739	0	0.178374	0	2.0743	0.520617	0.169605	2.14026	0.159588
ENSG00000105852.10	PON3	-1.6678053870519	0.685578708187506	0.0149868291365248	0.26819679509688	1.351498	0.5314025	0.945411	2.176131182225	12.610036	1.52980169	2.486236	10.144727	0.78415
ENSG00000120440.14	TTLL2	-1.43656621408514	0.59065790004422	0.0150096581430718	0.268400601901377	0.115997	0	0.205704	0.1882195	0.251697	0.457214	0.9182385	0.5038133	0.237016
ENSG00000109445.10	ZNF330	1.08241436639188	0.445155892686329	0.0150347874519695	0.268645200617408	38.947827	76.87282	53.285709	17.306701	11.648835	34.413766	18.124593	17.666348	29.54985
ENSG00000132840.9	BHMT2	1.59728029133378	0.656990630631008	0.0150486097731188	0.268687544815176	39.23771	39.304175	33.582954	2.846225	1.013648	16.319637	3.5335301	4.940876	12.700162
ENSG00000131015.4	ULBP2	-1.39928516911228	0.575771379154664	0.0150871983442821	0.268907240047791	0.568589	0.549712	0.399044	0.0341242	1.27286	0.517412	1.29631	1.21122	1.58702
ENSG00000224881.1	AC068279.1	-1.60907518184199	0.662297714895522	0.0151182238448078	0.268907240047791	0.292121	0.340091	0.222268	1.13936	2.87138	0.648509	5.59413	1.34996	0.796311
ENSG00000146670.9	CDCA5	-1.58915474916461	0.654073820955988	0.0151144111001957	0.268907240047791	1.05271	0.427208	0.722636	6.349139	7.146794	4.0580982	13.875804	13.2051924	11.120606
ENSG00000135094.10	SDS	-1.70972946043241	0.703533231878838	0.0150903155131365	0.268907240047791	4.042788	2.533869	0.313591	0.510028	4.168117	0.7527556	14.086982	22.8132776	4.527949
ENSG00000006377.10	DLX6	-1.90608588375008	0.784531051758601	0.0151160663783589	0.268907240047791	0.2088462	0.0230811	0.0484033	0	0	0.4259488	0.807558	1.1509537	0.347044
ENSG00000002726.20	AOC1	-1.99428374624198	0.82100355281063	0.0151371696638402	0.269040255669209	0.3607313	0.1982794	0.2058074	15.306355	180.220856	2.3837278	205.77585	2.115921	7.9524934
ENSG00000197083.11	ZNF300P1	1.35644206214876	0.558566993373776	0.0151642609078464	0.269317732898549	7.37412	4.76127	4.615637	0.60437	0.562285	1.373991	3.33007	1.588037	0.956689
ENSG00000151929.9	BAG3	1.48332530910868	0.611102852247697	0.0152119900737602	0.269632315597193	92.52578	219.0504	140.97213	10.512779	11.807803	66.90362	23.97309	36.83435	45.24233
ENSG00000261136.1	AC023908.3	-0.765590266580887	0.315458589527761	0.015227945022219	0.269632315597193	0.406008	0.392262	0.286126	0.495863	0.585027	0.660782	0.946394	0.90445	0.65717
ENSG00000075188.8	NUP37	-0.565447528650556	0.232929614331585	0.0152013274733787	0.269632315597193	13.6682332	7.518871	10.491785	10.6706	14.143304	14.347361	20.97096	19.737895	14.093605
ENSG00000137936.17	BCAR3	0.858322956869146	0.353659423145605	0.0152252600737144	0.269632315597193	10.738112	15.357923417	7.316059	14.0407348	7.8107127	6.532808	7.454439	5.6436594	6.439295
ENSG00000102226.9	USP11	0.807961200387282	0.333022835204787	0.0152602332502851	0.27000025059196	75.318125	76.016387	70.764282	26.3565983	21.432871	50.623873	39.898934	31.35077	40.0079033
ENSG00000151322.18	NPAS3	1.29872549094497	0.535432140793921	0.0152845760055631	0.270076899639675	1.514106	1.934325	2.4482956	0.4242428	0.2343205	1.0674736	0.3201448	0.400407	0.96975159
ENSG00000154710.17	RABGEF1	1.17322684648635	0.483706445425993	0.0152875888803328	0.270076899639675	32.335084	70.468691	23.544822	9.2943654	9.215761	18.163044	17.857176	13.299883	16.341413
ENSG00000203747.10	FCGR3A	-1.52116679564619	0.627502037533037	0.0153437455453828	0.270776522638057	19.395311	2.82559	5.774363	5.3955083	5.92949	8.23833632	45.848457	74.0930621569	22.2257024
ENSG00000273723.1	AL139089.1	-1.21609661316368	0.501688398182989	0.0153502738633739	0.270776522638057	1.68575	1.63056	0.789142	2.42775	3.78484	3.06986	10.7214	3.83319	2.17956
ENSG00000141644.17	MBD1	0.528835831494495	0.218382485693382	0.0154521923264717	0.271318342214291	41.408713	42.962497	46.52688	29.820587925	19.3113418	40.7089597338495	29.5937378	33.8397342	25.115425616557
ENSG00000136603.13	SKIL	-0.995856081156015	0.411203040168915	0.0154433765643905	0.271318342214291	8.289266	7.003715	7.1173169	10.2975143	13.3457717	10.4458545	21.6287274	36.225565	11.532394
ENSG00000245648.1	AC022075.1	-1.05231922928938	0.434463519781215	0.0154306013415249	0.271318342214291	0.382179	0.295404	0.406541	0.223655	0.301568	0.432964	1.33775	1.09528	0.711404
ENSG00000112981.4	NME5	1.46939016063241	0.606833722017867	0.0154606449107871	0.271318342214291	8.21759	4.941376	8.420745	2.553757	0.448722	5.984274	0.955515	0.656479	1.705641
ENSG00000224888.4	AC138028.2	1.11500538204316	0.460491383376787	0.0154634827785405	0.271318342214291	0.33846	0.616214	0.409955	0.2026466	0.0944821	0.3431	0.2074526	0.1845318	0.1036681
ENSG00000099875.14	MKNK2	0.61595624415546	0.25443999428474	0.0154850714046688	0.271318342214291	76.769189	61.289193	83.790246265005	43.6120825	27.248118	54.185043	40.121869	61.714764	43.52717016527
ENSG00000228439.5	TSTD3	0.7537338347415	0.311196464790225	0.0154331672430661	0.271318342214291	3.6339742	2.467482	2.87607	2.49894	0.84744	2.86211	1.7752	1.72	1.79737
ENSG00000184185.9	KCNJ12	1.26205763515038	0.521329941187558	0.0154845881466247	0.271318342214291	1.59669	0.436679	0.828083	0.315231	0.0834915	0.426277	0.350335	0.158673	0.497775
ENSG00000171132.13	PRKCE	0.837318829085498	0.345631137273949	0.0154107630441466	0.271318342214291	7.23839	7.1556065	6.662818	2.627425	1.8014974	5.3130425	3.951614	2.8883837	3.2765432
ENSG00000197019.4	SERTAD1	1.09369138062798	0.452386239246115	0.0156230119140679	0.271706065615972	26.9922	43.2877	19.6616	9.91583	11.4157	12.8582	9.49676	17.5614	6.05638
ENSG00000228146.8	CASP16P	-1.68067341491209	0.694936213577638	0.0155864836477139	0.271706065615972	0.1945251	0.1394743	0.0259676	0.1441817	1.312329	0.6516633	0.2530218	0.214426	0.224067
ENSG00000154845.15	PPP4R1	0.614885937859607	0.254326556625354	0.0156188430587339	0.271706065615972	34.322348	45.060694	37.213746	31.170134	17.9869	36.652011	28.244704	19.981339	26.418664
ENSG00000169684.13	CHRNA5	-1.00895549026223	0.417222387291026	0.0155945923800797	0.271706065615972	1.086462	0.667803	1.0108766	1.661403	2.727728	1.9261747	1.608834	2.465483	3.429188
ENSG00000088325.15	TPX2	-1.6797256883231	0.694510154686056	0.0155813843330781	0.271706065615972	1.60054	0.23562	0.849266	7.940498	11.506366	3.85876	24.0855	16.011193	15.253661
ENSG00000146592.16	CREB5	1.58415003918989	0.654711989458009	0.0155370065650691	0.271706065615972	8.5973381	36.4542579	5.8085819	1.878043	0.915865	8.133967	3.018181	3.3422465	3.871656
ENSG00000113810.15	SMC4	-1.23379513669912	0.510246711769364	0.0156045145133342	0.271706065615972	11.572406	12.0971306	8.8913672	30.05970506	28.4540191	22.624356	35.050001	79.548564	62.085809
ENSG00000119771.14	KLHL29	1.50884835773565	0.624066677471335	0.0156160355602066	0.271706065615972	16.0592052	24.212729	15.78734	1.3061263	0.7740719	7.315339	3.71869	3.472724	6.648579
ENSG00000138115.13	CYP2C8	-1.39038660267324	0.574560556529902	0.0155242176082783	0.271706065615972	0.5343	0.3509278	0.2985789	0.4997858448	2.1097866	0.603093	0.550311	2.6886610902	0.68895
ENSG00000196993.8	NPIPB9	-0.887387137999365	0.366842352594712	0.0155637665605192	0.271706065615972	0.89488	0.833268	1.00895	0.793984	1.372475	1.522022	2.09579	3.16737	0.95433573
ENSG00000187699.10	C2orf88	0.796103037436526	0.329616887150463	0.0157249563233362	0.273074992754269	4.863853	2.174474	5.389144	3.455567	1.3517437	2.988297	3.539792	2.57712	1.5600095
ENSG00000224167.1	AL390729.1	-1.73217307208655	0.717314975971024	0.0157437995632189	0.273074992754269	0.490451	0	0.175926	0.1724444	0.457519	0.401929	0.636416	0.844516	2.772898
ENSG00000226887.7	ERVMER34-1	-1.21686953982805	0.503942851346172	0.015748282903394	0.273074992754269	0.2268789	0.0381743	0.140097	0.2694877	0.2600347	0.2974155	0.601785	0.624179	0.533013
ENSG00000165323.15	FAT3	1.90668607331113	0.789591971622038	0.0157449806079064	0.273074992754269	10.88231	7.59861	6.029872	0.0254853500356689	0.0257728	3.0556682	0.142222600084624	0.5241864	0.4803551
ENSG00000198796.6	ALPK2	1.83317318201927	0.759457905899939	0.015787485482666	0.273552582650537	14.9491302	2.6104933	5.570695	0.5970931	0.00558343	0.3414058	2.3403561	1.4760929	0.755083
ENSG00000260060.1	AC009088.1	1.073138014463	0.444826475576785	0.0158441097968022	0.274331114348913	0.952476	1.76632	2.25503	1.30018	0.81389	0.548299	0.61094	1.17355	0.577024
ENSG00000251455.1	AC092611.1	-1.39197605331576	0.57731851048677	0.0159042307494683	0.274379825448822	0.147071	0.022573	0.0618346	0.134409	0.370642	0.101942	0.368326	0.275117	0.287086
ENSG00000261324.2	AC010168.2	-1.4072989231148	0.583794479811286	0.015926009220381	0.274379825448822	0.747099	0.320295	0.467355	1.42523	2.11643	1.20808	3.78621	5.17325	0.660897
ENSG00000085563.14	ABCB1	-1.53380020359173	0.636358910055737	0.0159404842967795	0.274379825448822	4.589625	4.749976	4.691076	3.77016100138878	2.357201	25.183174	56.084568263	8.835003957	3.502358
ENSG00000270689.1	BUD13P1	1.54088409841857	0.638875335299128	0.0158709499512548	0.274379825448822	0.389875	0.376885	0.276627	0.0608375	0.0615226	0.153718	0.0374302	0.0338758	0.10623
ENSG00000229644.6	NAMPTP1	1.64323960179139	0.681597271741353	0.0159146999207655	0.274379825448822	7.14787	46.3357	10.5352	1.51476	1.70762	3.24099	9.91076	5.78146	1.51936
ENSG00000226812.2	AL117382.1	-1.9755549417321	0.81927433877457	0.0158937069682638	0.274379825448822	0	0	0	1.06098	3.78884	0.895209	19.93426	1.01757	1.23627
ENSG00000234160.1	AL513165.1	1.43067349096399	0.593183889673046	0.0158715951003223	0.274379825448822	6.216	27.1261	8.35896	3.74782	2.29901	6.19435	6.10179	1.68138	3.50302
ENSG00000138685.15	FGF2	1.59562078174122	0.661943251021418	0.0159302375281783	0.274379825448822	10.36139	18.49767	18.81455	0.983087	0.499378	5.82509	1.56710000151917	2.49289	6.00496
ENSG00000038945.14	MSR1	-1.03876881756677	0.431024686409128	0.0159525891664332	0.274386872751972	6.083817	3.215547	5.4357023	2.9071875	2.2795788	9.9030757	12.17031597066	15.819782	11.394947
ENSG00000237781.3	AL356356.1	1.42019306202162	0.589565077362099	0.0160014439571371	0.274962465748635	0.864229	4.49705	2.30353	0.589753	0.340772	1.06695	0.832781	0.846156	0.491012
ENSG00000105227.14	PRX	1.1502149249795	0.47752537866073	0.0160094935515381	0.274962465748635	3.81009	3.030658	3.344527	2.388047	0.3188981	2.949929	0.951404	1.045614	1.878634
ENSG00000261239.6	ANKRD26P1	-1.97180457341863	0.818788347649568	0.0160314777691197	0.275138624682748	0.0370409	0.0848331	0	0	0.0971513	1.768643	0.0212177	0.00960948	0.3643632
ENSG00000121858.10	TNFSF10	-1.15329843496118	0.478985610208428	0.0160492564003729	0.27524240088388	23.26963	12.1706699	9.5108849	20.893168	39.806377	22.4846417	46.395912	83.177716	18.399882
ENSG00000214265.11	AC124312.1	1.74768138527159	0.726002669293627	0.0160724679752562	0.275439131605176	0.187304	0.388421	0.131172	0.0977048	0	0.0620374	0.00747207	0.0477937	0.0555242
ENSG00000165923.15	AGBL2	-0.996309624411255	0.413945955796327	0.0160903728105048	0.275544698180477	1.3005769	0.5532175	1.7204968	1.766624	1.7891138	5.1889567	2.594798	2.567525409	3.370132
ENSG00000108381.10	ASPA	1.3529600555024	0.562356103059837	0.0161336610545405	0.275682317553222	3.11286	2.176328	2.7484119	1.1836	0.38612	2.47903	0.3255719	0.325324	0.671661
ENSG00000070748.18	CHAT	1.93215008135098	0.803018938075206	0.0161235088835255	0.275682317553222	0.2988312	0.0253734408	1.491887774	0	0	0	0	0	0
ENSG00000236782.7	AL391650.1	1.43821015817959	0.597679079415697	0.0161139187481165	0.275682317553222	0.411264	2.202985	0.873194	0.3819895	0.251613	0.4301007	0.4936331	0.3679911	0.127719
ENSG00000127561.14	SYNGR3	1.12060800198674	0.465895629260883	0.0161602151863516	0.27573440617236	3.790678	1.4302565	4.23681	1.726782	0.7470078	0.489144	1.1842442	1.901557	1.800847
ENSG00000280027.1	AC007342.9	-1.95777111339674	0.813912044883368	0.0161554743894378	0.27573440617236	0	0	0	0.397053	3.41295	0.250838	2.3212	0.331667	0.654827
ENSG00000123560.13	PLP1	1.80682114972759	0.751558359536495	0.0162123555871639	0.275821663836441	21.547634	20.449045	53.008584	1.420622	0.451489	15.214093	1.4248382	0.460019	4.636178
ENSG00000137225.12	CAPN11	-1.36396981087741	0.567271098444124	0.0161972265086077	0.275821663836441	0.690611	0.0768321	0.2375791	0.2092915	0.2469309	0.612649	1.705901	1.412419	0.704817
ENSG00000115556.13	PLCD4	1.71292667982183	0.71249629489802	0.0162114453232901	0.275821663836441	36.8360608	15.12388	55.40846	1.60279	0.7597097	13.738058	1.725081	2.39403	10.4350531557
ENSG00000141965.4	FEM1A	0.490824986476936	0.204122598417271	0.0161919585454159	0.275821663836441	1.02517	1.00462	0.951114	0.855517	0.48017	0.918898	0.73077	0.683592	0.830779
ENSG00000204936.9	CD177	-1.38172938407628	0.57498515745477	0.0162580902944077	0.276399316229781	0.571657	0.504371	0.453307	0.377494	0.549126	0.443425194396	3.14728	3.3582459	0.631963
ENSG00000233892.1	PAIP1P1	-1.21028523247293	0.503885759314081	0.016309987047408	0.276425871221546	0.450933	0.339138	0.2032	0.429991	1.26496	0.395222	1.54023	0.870937	0.7282
ENSG00000267383.6	AC011447.3	-1.1184018230686	0.465598024730464	0.0163023227809502	0.276425871221546	1.641839	0.831718	0.4214985	0.7887392	2.414531	1.72491	1.219127	3.145812	2.339036
ENSG00000206559.7	ZCWPW2	1.32058994902532	0.549747373188293	0.0162978647272895	0.276425871221546	2.5343852	1.85169	3.057158	0.310378	0.3942152	1.271541	0.363354	0.5439774	0.888993
ENSG00000179388.8	EGR3	1.66667043359535	0.694027391388268	0.0163303464265403	0.276425871221546	18.769875	32.35299	6.40015	1.0737585	0.6654293	3.55809	4.252367	8.7430565	1.00396
ENSG00000214106.8	PAXIP1-AS2	0.521413699174426	0.217115547978054	0.0163258076159131	0.276425871221546	4.903126	3.670778	5.449679	3.645814	2.1460561	3.620551	4.572898	2.688068	3.319448
ENSG00000143641.9	GALNT2	0.890708741381016	0.370859438942892	0.0163172061096454	0.276425871221546	60.783713	89.69436	58.90947	22.794757	22.082309	45.818292	31.300681	31.426794	30.579409
ENSG00000142871.16	CYR61	1.59595014290426	0.664790535620129	0.0163645863287752	0.276725205955522	630.5646	321.4696	253.8604	17.63297	38.34211	82.11835	111.4625	149.8118	11.929475
ENSG00000215421.9	ZNF407	0.741282546434984	0.3088342280205	0.0163834155011389	0.276725205955522	4.6930423	3.2057415	4.5281144	2.1011495456599	1.1800636	3.193047	2.1403057358707	1.8822968	2.8284994
ENSG00000162913.9	OBSCN-AS1	1.04659372010506	0.436017293636934	0.016379442358296	0.276725205955522	0.832128	0.708382	1.221827	0.6419363	0.218128	0.831245	0.4260315	0.263208	0.4326616
ENSG00000138092.10	CENPO	-0.867705312381691	0.361613922493583	0.0164159043274909	0.276875292183511	3.20877300334992	2.0662286	2.409245	4.031756187073	4.732062	4.5474791	10.844474	5.501222	4.535655
ENSG00000154734.14	ADAMTS1	1.52178062253426	0.634189347230934	0.0164144195173638	0.276875292183511	149.550393	110.5576	47.794364	7.7739	5.421188	41.974145	26.46363	35.0671880158566	7.99904
ENSG00000172379.20	ARNT2	1.06966965199117	0.446049007064095	0.0164804129306578	0.277564226680662	5.20124	3.9653302	4.7722221	1.61339	0.5641736	2.56885	1.22727	2.124356	2.69121
ENSG00000267493.3	CIRBP-AS1	0.97907022096163	0.408253741675624	0.0164762964828742	0.277564226680662	1.58213	4.10118	2.69583	2.02412	0.898623	1.74784	1.76429	1.70563	0.804953
ENSG00000236155.6	AL355877.1	-1.72178779530258	0.718162477710208	0.0165078041697502	0.277826107336091	0.0572362	0.112566	0.0580424	0.0453439	0.135468	0.282237	0.275029	0.0995102	0.798584
ENSG00000072803.17	FBXW11	0.512864324999161	0.214070351808249	0.0165852829689234	0.278929981171262	20.87975	22.471672	19.20324	14.218192	10.600161	16.907935	12.815013	17.4538501	13.326179
ENSG00000196972.8	SMIM10L2B	1.23501478976483	0.51597229295488	0.0166853863010742	0.279626694752794	2.67427	0.899573	2.44843	0.479162	0.359514	1.07332	0.474946	0.309667	0.917362
ENSG00000120910.14	PPP3CC	0.993134572491609	0.414953599878723	0.0166947170064627	0.279626694752794	13.950985	28.734459	19.057722	8.212091	4.006412	12.9937823	8.882123	12.315526	7.797476
ENSG00000154359.12	LONRF1	1.23238618829136	0.514871618948523	0.0166848618517115	0.279626694752794	17.6878	39.965364	32.719223	8.639892	3.70738	22.024124	9.9268204	6.125986	10.7875701
ENSG00000160471.12	COX6B2	-1.85776595184154	0.775970563446284	0.0166603376278688	0.279626694752794	0.742227	0.0425489	0.0696283	0.444949	6.495712	0.3820633	0.2805784	2.7827847	0.2873853
ENSG00000272100.1	AL513218.1	-1.30328794484983	0.544548764363284	0.0166959616350512	0.279626694752794	0.815221	0.753587	0.578355	2.05073	3.67964	1.43763	4.01437	4.40861	3.11735
ENSG00000198920.9	KIAA0753	0.989556937440107	0.413472091579914	0.0166982225543951	0.279626694752794	20.71947	10.505982	20.4851349	5.2326187	4.098737	13.1821272	6.1827535	6.3545084	5.6601483
ENSG00000277112.3	ANKRD20A21P	-1.80175705843458	0.753572526382265	0.0168046695965391	0.279878214268417	0.11867	0	0.0150263	0.0231494	0.47164	0.116889	0.3299228	0.0257619	0.2113944
ENSG00000197249.13	SERPINA1	-1.70972252807132	0.71542604272511	0.0168577185812072	0.279878214268417	15.6072636	5.77156	8.6229995	50.6013606	49.273985	13.108452	97.447046	382.285975	36.657672
ENSG00000172955.17	ADH6	-1.7121452952163	0.716586989909466	0.0168802554532974	0.279878214268417	0.075789	0.0186615	0.3649909	0.4264596	1.2174914	0.34893	3.0705738	0.33315	1.0769758
ENSG00000146090.15	RASGEF1C	1.72501750542772	0.721658907963667	0.0168323148046918	0.279878214268417	3.608935	1.825275	2.8730138	0.244727	0.100266	1.241946	0.0707929	0.064098109062	0.7138301
ENSG00000231817.8	LINC01198	1.68243022694813	0.703823081642802	0.0168292807314601	0.279878214268417	2.3768295	4.285229	3.3418122	0.1907873	0.2253509	1.98373	0.540633	0.1272818	0.2084472
ENSG00000238186.1	AL603839.2	-1.74008014996104	0.728209183795035	0.0168697909420917	0.279878214268417	0.257205	0	0	0.179464	0.784689	0.460341	0.93464	0.215862	0.683782
ENSG00000187474.4	FPR3	-1.32736026197082	0.554911293904103	0.0167558183196948	0.279878214268417	5.17101	1.06348	1.09407	3.56489	1.98279	7.11973	10.5363	16.3044	6.8075
ENSG00000170242.17	USP47	0.794820943492535	0.332575203244542	0.0168530345965384	0.279878214268417	31.29841	49.204311	40.06406	20.9924343	13.04704	32.360784	20.121246	17.656879	24.33282
ENSG00000174574.15	AKIRIN1	0.971699177729177	0.406429434927142	0.0168108423841627	0.279878214268417	48.196231	75.824412	55.71221	16.8942598	14.55929	33.063547	21.617664	31.9657	26.651922
ENSG00000226763.4	SRRM5	-1.21480774634238	0.508025587269913	0.0167918748033495	0.279878214268417	0.748852	0.279419	0.4053943	0.1893624816	1.769793	0.601386	0.800768	1.044934	0.644118
ENSG00000167772.11	ANGPTL4	1.6675354706954	0.697746309650783	0.0168535155167793	0.279878214268417	28.718366	67.358845	10.1356256	2.08081800030474	2.081033	15.930783	11.436474	2.924932	2.0298826
ENSG00000196747.4	HIST1H2AI	-1.87370522906309	0.783225625000359	0.0167434670458898	0.279878214268417	0	0	0	0.387403	1.45713	0.491539	0.416771	2.16511	0.452048
ENSG00000175606.10	TMEM70	1.33918554358217	0.560052084847341	0.0167943006346549	0.279878214268417	36.544602	132.890235	41.16806	9.272422	13.27146	19.629278	25.8542940267397	24.490172	20.102221
ENSG00000174460.3	ZCCHC12	1.69373946648201	0.708436214780089	0.016811051187384	0.279878214268417	1.43518	1.14774	2.68271	0.0579216	0.0585743	0.950828	0.213635	0.107462	0.202231
ENSG00000272913.1	AC009237.14	-1.16257830616414	0.486680380210594	0.0169038593568589	0.280071641505132	2.31679	0.384585	1.07341	1.683	3.69199	1.8744	5.91379	2.7418	2.99204
ENSG00000230650.1	AC140479.2	-1.66090201130309	0.695760551568723	0.0169784193334514	0.280993099436134	0.136378	0.0331431	0.0521283	0.589775	1.72321	0.476189	1.61224	0.610717	0.560941
ENSG00000254206.5	NPIPB11	-1.14592667040163	0.480108620011038	0.0169954054856943	0.280993099436134	6.38122	1.98979	2.39155	1.97286	10.96154	3.712029	10.451895	7.97533	4.008393
ENSG00000236008.2	LINC01814	-1.09340475780127	0.458056136055056	0.0169839937661381	0.280993099436134	0.5443374	0.2969827	0.5106151	0.5675186	0.325536	0.8591906	2.3328095	1.1301166	1.5057405
ENSG00000123360.11	PDE1B	1.40260837335779	0.587760517099066	0.0170160701935905	0.281136635782977	35.1563	15.4096678	18.798458	3.5459388	1.1521293	13.7650529	3.4526881	5.44413	6.55457
ENSG00000127191.17	TRAF2	-1.01808177746657	0.426689805036935	0.0170327616283254	0.281214370557455	11.8273	5.672402	6.507278	11.2681914	18.873977	11.094515	18.689763	36.9288447	13.58155
ENSG00000255346.9	NOX5	1.4466341825398	0.606637618987216	0.0170941681595774	0.281891758075571	0.25058221	0.299092	0.37996560502815	0.262752	0.2436624	0.0556281	0.0370171	0.0441544	0.0530164279647
ENSG00000262585.1	LINC01979	-1.78543156566712	0.748735009304104	0.0170978207127376	0.281891758075571	0.0297322	0.0574397	0.0301142	0.225733	1.37299	0.0893105	0.542751	0.545517	0.0449906
ENSG00000128564.6	VGF	1.40545468621837	0.589653596677478	0.0171476725198521	0.282316873675965	1.5024	0.375765	2.40113000068691	1.10310405	0.892314000689955	0.229315	0.232867	0.23003	0.427989
ENSG00000156218.12	ADAMTSL3	1.43303898732475	0.601192397907324	0.0171413757000545	0.282316873675965	9.392595	6.6029399	8.3589439	0.8818302	0.627064	3.9674695	0.7175106	1.552768	3.1969688
ENSG00000122035.6	RASL11A	1.36961939258758	0.574778703292613	0.0171785465192611	0.282508541328814	58.92353	136.0492	58.7904	11.98422	14.61965	33.97983	48.09202	15.25159	10.033301
ENSG00000183690.12	EFHC2	1.26888071056825	0.532525626809318	0.0171833974884369	0.282508541328814	4.53106	5.85468	5.35905	0.7641581	1.311335	2.893125	0.837706	0.999275	1.81907
ENSG00000204710.2	SPDYC	-1.94519491640212	0.816592186419307	0.0172147563047485	0.282627989969003	0	0	0	0	0.0501127	0.0626599	2.07635	0	4.38633
ENSG00000119471.14	HSDL2	0.597178566306384	0.250679948151385	0.0172079084822277	0.282627989969003	32.50752	31.812665	29.08293	15.273745	15.656251	19.339486	24.560352	16.401829	17.302363
ENSG00000272106.1	AL691432.2	0.701146924145219	0.294412846043294	0.0172418564687426	0.282874961267952	5.02822	5.18688	5.09799	5.02671	2.28691	5.43724	2.59711	2.70757	3.57423
ENSG00000149654.9	CDH22	1.82970502518438	0.768408829999835	0.0172581741680464	0.282944810731332	0.148775	0.0280564	0.102965	0.0906447	0.034375	0	0	0.0303205	0
ENSG00000106123.11	EPHB6	0.973252397908419	0.409086683116067	0.0173556266143338	0.283062349455276	10.4846828553394	6.658922	9.599815	10.474005	3.53730300733196	8.063223162	1.809117	5.48163866153	5.14590504
ENSG00000165495.15	PKNOX2	1.48270020388572	0.622899014960479	0.0172975175515403	0.283062349455276	5.559988	5.4175866	5.806447	1.557031	0.4033278	3.6315681	0.3431198	0.4801567	2.2078427
ENSG00000068650.18	ATP11A	-1.26685881585368	0.532482450803173	0.017352330847224	0.283062349455276	6.835244013	8.15778270114	5.975724365165	6.23980111	23.574629	8.983140964866	47.011824	13.4043861903	5.63852037878
ENSG00000285576.1	AL138686.2	1.92558391739414	0.80942106704958	0.0173613517500608	0.283062349455276	0.434626	3.06696	2.910376	0.4348633	0	0.927475	0	0	0.098705
ENSG00000105426.16	PTPRS	1.11161231224936	0.467119679680008	0.0173259716926752	0.283062349455276	22.4844331	16.2159891	22.8692899	7.5094841	3.619617	16.9742465	5.5252754	4.0166876	9.138342
ENSG00000114923.16	SLC4A3	1.45635048520922	0.612267134745976	0.0173776079807644	0.283062349455276	8.5886222	8.60850652	7.721251	0.8709410144531	0.264655600311051	3.8186382	1.7737843736251	1.5920138	2.9022470029457
ENSG00000169282.17	KCNAB1	1.20650908892833	0.507260680112474	0.0173842072286531	0.283062349455276	2.936964	1.06032515078	4.9503	0.630467	0.638228	1.641298	0.8115820133379	0.830467	0.85759
ENSG00000223573.7	TINCR	1.04803266097799	0.440636943142103	0.0173856241455709	0.283062349455276	0.992359	0.796893	1.00866	0.2102355	0.265704	0.3889679	0.256584	0.342633	0.477083
ENSG00000279526.1	AC011239.2	1.84149253929044	0.773500827061755	0.0172786186661102	0.283062349455276	3.04103	5.12564	5.09783	0.121675	0.0922839	1.57561	0.0374302	0.0677515	0.956072
ENSG00000243155.1	AL162431.2	-1.09004882284107	0.458303820403547	0.0173859957190679	0.283062349455276	0.704228	0.386567	0.477422	0.523333	1.19692	0.787434	2.84514	0.726488	0.79744
ENSG00000233705.6	SLC26A4-AS1	1.56463063241862	0.658028571648557	0.0174184015139349	0.283393285657717	1.922954	0.3767051	0.708053	0.291983	0.3543441	0.0407977	0.1520026	0.409688	0.0501444
ENSG00000065328.16	MCM10	-1.64116366186893	0.690874540993968	0.0175257979845598	0.284701918031502	0.3733428	0.0223363	0.2608545	0.990035	1.309628	0.5458648	3.461463	4.0365119	1.092553
ENSG00000100425.18	BRD1	0.447981114963673	0.188585923590007	0.017526387647317	0.284701918031502	22.356716	20.036255	24.85665	17.252861	10.901212	22.299475	18.002654	14.837898	16.579236
ENSG00000089723.9	OTUB2	-1.20981967939202	0.509335896731615	0.0175352402521427	0.284701918031502	0.502889	0.2496403	0.102036	0.267037	0.879346	0.261585	1.017923	0.654061	0.796291
ENSG00000170145.4	SIK2	0.918678939510994	0.386947477021695	0.0175884691760899	0.285368655145398	12.9899	18.959	11.4329	5.65625	3.69062	8.35443	5.31495	10.0906	6.073534
ENSG00000205177.6	C11orf91	1.56283675492581	0.658455984489264	0.0176210107486228	0.285412686988134	0.523086	4.36765	1.31454	0.73657	0.601616	0.295746	0.445476	0.892698	0.0983469
ENSG00000177606.6	JUN	1.11515637108809	0.469866488514687	0.0176276792739358	0.285412686988134	181.617	89.7488	268.097	34.2016	44.2403	64.502	84.0787	81.5848	40.5086
ENSG00000188487.11	INSC	0.999296956638662	0.42097646637769	0.0176080072652295	0.285412686988134	2.991693	1.512973	3.934096	3.364806	1.50429	1.8426900240034	0.6257115	1.674977	1.612867
ENSG00000170946.14	DNAJC24	0.626976141126337	0.26434732365258	0.0177021845820713	0.286421346537913	9.129893	8.03076	10.227771	6.0257534	3.5473477	8.482262	4.9780938	5.040392	6.428059
ENSG00000173451.6	THAP2	1.35632359419568	0.572579885746579	0.0178462074538904	0.286773885668304	14.92173	21.53874	3.67813	2.049061	3.756935	2.42519217	4.166236	5.21239	2.75965
ENSG00000274818.1	AC004825.2	1.56444347697051	0.660146587259783	0.0177956613920922	0.286773885668304	2.35573	10.6598	8.19079	2.14335	0.154838	3.88772	1.14049	1.02734	2.50218
ENSG00000164778.4	EN2	-1.84555574134851	0.778383694364115	0.017739537667388	0.286773885668304	0.0471896	0.0151965	0.0318687	0.0122738	0.0992976	0.0309883	0.0301639	0.682966	0.0285648
ENSG00000164949.7	GEM	1.64475972865103	0.694314562699865	0.017841218210135	0.286773885668304	245.383528	133.0196	394.69437	5.541328	5.780472	57.19203	29.04229	77.45529	60.871388
ENSG00000256223.5	ZNF10	0.736152022687223	0.31064994402856	0.017801772035073	0.286773885668304	18.138653	9.646184	12.567108	5.787119	5.607336	9.8354337	6.14903	5.6698124568	7.4373801
ENSG00000168216.11	LMBRD1	0.574860665981273	0.242480451735431	0.0177520072088909	0.286773885668304	62.5250865717079	52.7403880040085	48.0322445681	25.275050842	24.4112727442	38.6186600005864	37.8233044077137	34.36227734096	29.2489162606415
ENSG00000076716.8	GPC4	1.23887120216548	0.522654445360866	0.01777150741459	0.286773885668304	36.9433	22.9374	33.5795	5.73411	4.02414	14.797	7.88385	4.78531	16.9961
ENSG00000150551.10	LYPD1	-1.33007890043242	0.561327375908382	0.0178109809527429	0.286773885668304	1.317078	1.252002	2.30347	0.37486	0.55356	5.584652	4.89221	3.233651	6.29907
ENSG00000142459.8	EVI5L	0.726228225900796	0.3065523749137	0.0178353646900082	0.286773885668304	14.62422	11.576978	15.944646	9.469071	6.50332	10.935714	5.380921	6.364014	10.63833
ENSG00000257391.1	AC126763.1	-1.93412242161766	0.816403808150626	0.0178326032292596	0.286773885668304	0.157214	0	0.0531002	0	0.886804	0.05907	0.681662	1.42343	0
ENSG00000272356.1	AL080317.3	-0.731182156601754	0.308859354817562	0.0179153596665322	0.28681137984189	0.768065	0.50972	0.585486	0.626586	0.997919	0.908829	1.64527	1.36168	0.691833
ENSG00000145916.18	RMND5B	0.458007462499367	0.193417664261953	0.01788592714113	0.28681137984189	29.91668	26.000671	29.068619	19.3100488	15.1193	25.66431	18.064823	19.0444369	21.684371
ENSG00000123358.19	NR4A1	1.75659708487626	0.741965789861462	0.0179091715871709	0.28681137984189	975.4786623	203.170169168877	192.347320028557	10.7607624490744	28.37010853555	24.7410710729865	38.690587044597	207.690461278525	9.606858423386
ENSG00000258551.5	CRAT37	-1.94289147318969	0.820483323925619	0.0178853040548225	0.28681137984189	0.0259052	0	0	0.107288	0.2616356	0.0255246	2.13098	0.0450022	0.0470487
ENSG00000109814.11	UGDH	1.38308617527372	0.5842640454187	0.0179218909188956	0.28681137984189	10.887313	94.369177	11.71028	20.935296	10.383061	13.035277	15.8615118	14.3057497	9.8323
ENSG00000232729.7	AC211433.1	1.58180952862863	0.667965519194785	0.0178796748257555	0.28681137984189	0.4214045	1.6651196	0.191348	0.2604118	0.1405356	0.286658	0.090851904	0.1674775	0.171608
ENSG00000276545.1	PCDHGB9P	-1.731384288297	0.731546481284734	0.0179452717260818	0.286989788660944	0.0479315	0.0463164	0.0485649	0	0.0945517	0.0236124	0.183914	0.437126	0.108813
ENSG00000198680.4	TUSC1	1.00196758465141	0.423717638303518	0.0180443955661748	0.288328601475432	16.2545	29.1084	19.8253	6.75419	4.2609	13.5296	9.34652	8.15556	10.9659
ENSG00000174483.19	BBS1	0.681129002199207	0.288062555478933	0.0180535661552112	0.288328601475432	33.8139795	27.597111	34.094748	15.1494751	12.1119098	26.2807006	16.1786096	14.7884236	19.768209
ENSG00000139197.10	PEX5	1.39457259249616	0.589896791510768	0.0180741327452679	0.288460699548796	25.503115	123.6960584	25.908019	9.61424836	7.6569007	21.935712	24.969535	15.1520457	14.398902
ENSG00000238273.3	AC108058.1	1.13706319087317	0.481166641776852	0.0181209189027672	0.289010794274522	1.626558	2.301461	0.779905	0.787464	0.712638	0.322254	0.945278	0.621561	0.42074
ENSG00000130818.11	ZNF426	0.837322017695878	0.354401411133811	0.0181454151983475	0.289204881772032	4.677983	7.22164	6.601713	2.330778	2.168172	4.393251	2.9300816	2.5833603	2.995124
ENSG00000120705.12	ETF1	1.06486126363987	0.450859695073248	0.0181841837957845	0.289626025820027	57.937298	135.350006	67.472608	25.32099	19.872382	53.490558	32.687517	30.555297	37.959425
ENSG00000008311.14	AASS	1.09299710979918	0.46289898004149	0.0182158996110334	0.289934342452141	13.415452	16.759257	17.7293481	3.849313	2.7016649	11.3641371	4.808278	4.9061585	6.4821808
ENSG00000011114.14	BTBD7	0.308801577760996	0.130820025688801	0.0182499771326105	0.290279805768255	9.315402	8.401689	9.763386	7.87892000068586	6.049284	8.8121497	8.662403	7.423915	7.008738
ENSG00000101084.17	RAB5IF	-1.02487008517467	0.434238575750741	0.0182673303145844	0.290358967825518	57.63026	60.508265	53.061809	88.88111	174.1443	70.354408	155.46494	242.89808	101.4917
ENSG00000147588.6	PMP2	1.86810287763363	0.791635056302815	0.0182846360068939	0.290437268353242	1.53366	2.37915	4.36192	0.0575339	0	1.04583	0.141386	0.0512213	0.281182
ENSG00000160229.11	ZNF66	-1.35578387937786	0.574660696335584	0.0183105723408084	0.290652461223075	0.109247	0.174582	0.4004217	0.4608575	1.0168601	0.8311099	0.960436	1.369402	0.3775169
ENSG00000171208.9	NETO2	-1.4217089733991	0.602996763159045	0.0183866162450012	0.291268334722467	1.657805	0.8220284	0.8273852	1.635938	2.580791	1.4533796	12.605656	4.918403	0.8704885
ENSG00000253771.6	TPTE2P1	1.15270690286103	0.488878773305075	0.0183807046525709	0.291268334722467	2.3698648	0.990859	1.2986858	0.9524382	0.4606545	0.314787	1.339261	0.510045	0.418963
ENSG00000165521.15	EML5	1.33933627815755	0.568027052990852	0.0183799252096027	0.291268334722467	0.589816	0.4624668	1.002153	0.4821734	0.0830822	0.3115769	0.0662756	0.1229258	0.5537552
ENSG00000135119.14	RNFT2	-1.34689285785126	0.571360614693647	0.0184062443131823	0.291382522153556	1.0728847	0.317298194	0.5612205	1.893768	2.6747105014	1.0065702	2.803208251	5.977592	2.917125
ENSG00000205611.4	LINC01597	-1.28209050262255	0.543942799583579	0.0184216668180521	0.291430023748024	0.670567	0.272743	0.166825	0.367189	1.58743	0.382361	0.608974	1.64457	0.75837
ENSG00000158887.15	MPZ	1.38413150004517	0.587619844993872	0.018498393942315	0.29197925212251	12.46062	12.42881	27.362366	2.324046	0.98993	10.180937	3.930495	5.082728	3.704916
ENSG00000173281.4	PPP1R3B	1.06612832572758	0.452619400615914	0.0184996310780572	0.29197925212251	19.0039387	27.466566	16.4816	5.02079	4.84201	14.4872	6.223339	7.6742008	7.40427
ENSG00000130382.8	MLLT1	0.76991133557077	0.32688018132396	0.0185061654620933	0.29197925212251	44.265800295393	65.0538	41.70398	20.436563	17.854719	32.0434998	28.022628	27.231357	26.222748
ENSG00000213468.6	FIRRE	-1.68038952501367	0.713342211015078	0.0184899851000869	0.29197925212251	0.2111462	0	0.0712162	0.4884288	1.6429881	0.6431947	0.4572772	1.4709392	0.5425969
ENSG00000262943.7	ALOX12P2	-1.71622100552974	0.728996966613312	0.0185615007869333	0.292354702523242	0.3807444	0.3285261	0	0.4169978	1.321163	0.458643	0.3812993	0.7948487	4.815977
ENSG00000136274.8	NACAD	1.55993287525796	0.662608947987135	0.018561196926892	0.292354702523242	8.64582	10.09093	9.016651	0.607933	0.294405	4.22358	1.785944	0.619296	2.94901
ENSG00000283839.1	AC096667.1	-1.28586545539263	0.546222553047284	0.0185673460960586	0.292354702523242	0.0769631	0.0892237	0.0155926	0.0600536	0.0607306	0.299859	0.206193	0.237217	0.139762
ENSG00000271524.1	BNIP3P17	-1.80364644514303	0.766414915538832	0.0186048577698477	0.292356710072604	0.340707	0	0	0.119085	0.830802	0.125655	0.638095	2.24692	0.403973
ENSG00000084628.9	NKAIN1	1.59621902410505	0.67820314479403	0.018592598601048	0.292356710072604	0.231403	0.27153966	0.42626	0.0328286	0.0165993	0.1289271	0.121057	0.01827	0.0764083
ENSG00000261373.1	VPS9D1-AS1	-1.2923743501556	0.549150746923486	0.0186023390311543	0.292356710072604	0.893665	0.66505	0.39354	2.681476	4.1757	2.90407	4.22973	4.55857	2.18601
ENSG00000171791.12	BCL2	0.947997932506921	0.402872145492727	0.0186176902541446	0.292362537518398	5.522967	4.280007	8.012121	4.252282	1.187312	5.627737	1.8808206	2.880865	3.220846
ENSG00000183340.6	JRKL	-0.894770566389423	0.380518169501361	0.0187002552033428	0.292761807843717	4.35368	1.6277	2.66556	3.70726	6.1082335	3.65485	7.5509793	8.67966	5.0524871
ENSG00000164989.16	CCDC171	0.941347753728362	0.400339963425444	0.0187043773222602	0.292761807843717	1.37910989	2.1386878	0.8466095	1.1432238	0.515	1.0013645	0.4240432	0.825624	0.9156327
ENSG00000263647.1	BPTFP1	-0.915352805409703	0.389218325749518	0.0186842177609168	0.292761807843717	3.68384	3.58498	3.64694	2.60144	7.94093	6.19697	11.5603	4.89966	4.08289
ENSG00000090530.9	P3H2	1.13245801287828	0.481465407649904	0.0186674191060293	0.292761807843717	37.020546	48.871423	44.033061	26.956546	10.799049	22.1099455	7.344069	9.9930598	36.428025
ENSG00000236772.1	AL034550.1	-1.55299140454795	0.660468431739269	0.0187055091410312	0.292761807843717	0.321429	0.185505	0.129681	0.152608	1.62702	0.252236	0.678231	0.724956	0.176726
ENSG00000183036.10	PCP4	1.87963027511526	0.799502473935143	0.0187230364417509	0.292840771973278	25.509321	99.204332	4.65724	1.02198	0.258354	0.323572	1.26282	3.13636	16.264572
ENSG00000179604.9	CDC42EP4	1.07335245216162	0.456623818698522	0.018741791399833	0.292938819474672	59.084528	121.000066	64.718513	24.09576	34.999607	38.896297	20.113396	26.194315	34.399311
ENSG00000251596.1	HADHAP1	1.880748759467	0.800692622640028	0.0188288455629351	0.294103559089229	0.434074	0.116514	0.146604	0.0188162	0	0	0	0.0837818	0.0218985
ENSG00000260740.2	AC026471.3	-1.84339406978133	0.784923314253746	0.0188490917536017	0.294223913260978	0	0.210488	0.404992	0.284263	1.10896	0	0.384602	4.69894	2.37594
ENSG00000106483.11	SFRP4	-1.78987513821326	0.762218172319016	0.0188621013758473	0.294231223656086	17.98624	15.53212	6.82733	1.201381	0.651057	8.34335	168.093617	49.8358	123.1134
ENSG00000135916.15	ITM2C	0.915423619994349	0.389876767633696	0.0188754350966223	0.294243576612529	250.22172	136.50484	261.447712	82.147129	58.05465	74.716811	100.45046	82.539917	159.44683
ENSG00000219529.2	AP000580.1	-1.70457613554666	0.726273555658406	0.0189244085375155	0.294811121313846	0	1.66008	0.688487	1.61276	6.24478	1.8698	1.18189	16.2772	3.57619
ENSG00000144852.17	NR1I2	-1.92767144443757	0.821507036547374	0.0189503453652097	0.294823642316435	0.0505572162819	0.03870713139665	0	1.4435523	16.1164040058018	0.2352638	15.696148	1.9390188	0.3679562
ENSG00000163644.14	PPM1K	0.802791011681532	0.342095711329271	0.0189412400996595	0.294823642316435	14.2274823	9.688651	10.9103849	5.625028	2.4130113	8.8773807	5.2519811	6.6615206	6.793292218661
ENSG00000170558.8	CDH2	1.29036658461358	0.550070193913725	0.0189851882292328	0.295169980812479	2.003456	2.127635	3.58388	0.565445	0.1681818	0.8026271966	1.825419	0.629244	0.657961
ENSG00000171433.11	GLOD5	-1.8998730573501	0.810221420134158	0.0190331379054261	0.295508107833069	0.127476	0	0	0.4261	3.094516	0	3.207226	1.225544194	0.426732
ENSG00000248383.4	PCDHAC1	1.20261436741172	0.512824408839434	0.0190229872070313	0.295508107833069	0.1762795	0.0589154	0.3030758	0.2177239	0.0248397	0.0861542	0.0936732	0.0921305	0.10733
ENSG00000121350.15	PYROXD1	0.622507767890095	0.265500863894386	0.0190447235430544	0.295508107833069	9.0803757	14.9222897	12.2551399	12.9764689	6.552371	8.4268802	9.904168	9.786329	8.4223956
ENSG00000158859.9	ADAMTS4	1.74724231470427	0.746520711217543	0.0192572068169562	0.295729935369825	59.35706	115.6859	87.0829	0.5299698	2.351625	6.42834	20.97166	32.70338	3.955098
ENSG00000162595.6	DIRAS3	1.23428062130028	0.52734669723386	0.0192554274865137	0.295729935369825	11.69088	6.333324	7.913252	1.591649	0.9905077	4.5630378	2.561184	1.261242	4.133234
ENSG00000115956.9	PLEK	-1.49795780007714	0.639903300284053	0.0192366615749568	0.295729935369825	10.434593	4.27531	7.386608	7.991466	4.248548	11.5105	101.2687	29.14029	8.43037
ENSG00000269968.1	AC006064.4	-1.12449701730618	0.479869641738194	0.0191120333408435	0.295729935369825	6.98052	3.0894	4.04289	3.70631	2.61361	6.68742	16.9331	16.3459	13.9395
ENSG00000018236.14	CNTN1	1.78400130496783	0.761321907816959	0.0191142978231771	0.295729935369825	29.978063	18.711128	13.599236	0.2389648591	0.041991925411	4.415355	4.5799174	1.0479659234	3.86448
ENSG00000228198.3	OR2M3	-1.79897597402914	0.768396549721176	0.0192214668813765	0.295729935369825	0.00517428	0	0.00524012	0.0040376	0.0168165	0.0210706	0.0633217	0.00449197	0.0097381
ENSG00000126838.9	PZP	-1.40755014319687	0.601262002691714	0.0192325273825931	0.295729935369825	0.1934424	0.0115126	0.1235724	0.0278983	0.1398051	0.5249633	0.3427998	0.1880050909	0.203075
ENSG00000008838.19	MED24	-1.41839836522903	0.605522501868885	0.0191582636698408	0.295729935369825	44.4868060007488	30.6548303	43.046393936	67.7416913769	129.374820210457	51.2455290001644	525.761757491505	98.2093031	43.2363036963
ENSG00000112984.11	KIF20A	-1.65053481695216	0.704814945201279	0.0191910556698119	0.295729935369825	0.882110261	0.048538	0.237508	2.96038	3.479731	2.4774063	5.9719689	8.6127068	6.4212227
ENSG00000174482.10	LINGO2	1.43082906817727	0.610572502276505	0.0191077542908377	0.295729935369825	0.108429000478056	0.136583	0.143214	0.25381500225846	0.0998183	0.053405700251317	0.051067434	0.0313873	0.0160454
ENSG00000276900.1	AC023157.3	-1.56901260137825	0.67039031369806	0.0192607024954219	0.295729935369825	1.65035	0.617363	0.944029	3.59309	4.34769	2.72773	4.75002	24.7166	1.64373
ENSG00000186532.11	SMYD4	0.420198400982261	0.179356107493567	0.0191388069302063	0.295729935369825	7.95975	5.467789	5.893391	4.067024	3.7370231	5.407809	4.964706	4.380294	4.232646
ENSG00000175274.18	TP53I11	-0.762909710660066	0.325917719789586	0.0192422328976816	0.295729935369825	44.03545872066	32.1977767	25.70933728276	34.100892738805	57.189643923	36.691180313	62.67789742026	90.575855	61.3873732
ENSG00000255154.7	HTD2	0.923979653196373	0.394411275985446	0.0191457643048991	0.295729935369825	4.677342	3.592305	5.32826	1.85312	1.441245	2.59793542	2.878198	0.904999	2.417046
ENSG00000185274.11	GALNT17	1.36538098779107	0.58329843466582	0.0192428243770747	0.295729935369825	7.95314	5.68093	2.064039	1.380592	0.465385	1.954215	0.5484204	1.195078	3.0833374
ENSG00000158813.17	EDA	0.973223197028157	0.415406962258724	0.0191386809135964	0.295729935369825	2.96379540053129	1.21838519	1.847735	0.8753437	0.6045203	1.249405	0.4075703	0.8524218	1.125287
ENSG00000224287.2	MSL3P1	-1.30434547568766	0.557562430955931	0.0193162323336875	0.296208618617942	1.92025	0.3600839	0.605845	2.0162259	4.398697	2.482744	2.129863	6.741349	2.255969
ENSG00000231419.6	LINC00689	1.72185662080335	0.7360394198836	0.0193171299810516	0.296208618617942	1.4097008	1.5023911	0.9928164	0.3021306	0	0.7372572	0.0518693	0.1893975	0.1603124
ENSG00000135845.9	PIGC	-0.380912304522086	0.162897842278294	0.0193690562655926	0.296810861559156	21.274802	12.403468	18.280826	15.16709	18.182364	23.373453	27.242695	24.302561	22.206938
ENSG00000273175.1	BX323046.1	1.59116105676254	0.680604490391777	0.0193942798694247	0.297003394266693	0.449626	1.01657	0.914084	0.467448	0.118171	0.296415	0.289496	0	0.408973
ENSG00000198538.10	ZNF28	-1.45400983981578	0.62216751574079	0.0194388200780853	0.297491296707084	2.2381592	1.959043	1.9016837	5.711923	25.5949768	4.184296	9.0030451	4.2614006	6.5420205
ENSG00000113719.15	ERGIC1	0.541891306600337	0.23196348553711	0.01948571402892	0.297569759448451	101.200808	129.816028	101.0950679	80.600472	63.1789491145129	80.75255	74.172083	68.520971	86.453022
ENSG00000124212.5	PTGIS	1.67151827724436	0.715442060765954	0.0194733556232429	0.297569759448451	43.7491965	44.9981656	22.1645841	1.3196	0.250677	15.1181	4.50449	7.3251424	5.44598
ENSG00000150750.7	C11orf53	-1.78099224637455	0.762432604391511	0.0194946813977354	0.297569759448451	0.0591911	0.0482077	0	1.015927	2.1633751862	0.758922	3.06513	3.37979	1.08688
ENSG00000125823.12	CSTL1	-1.92243497650157	0.822772473950366	0.0194634835946092	0.297569759448451	0	0	0	0.126237	1.810128	0	0.806125	0.163089	0.441877
ENSG00000135744.7	AGT	-1.0471208427527	0.448827390943676	0.0196473805979413	0.299705589212159	8.2198	7.26932	5.38183	11.4958	6.08763	33.7679	14.8937	29.3296	16.9576
ENSG00000164400.5	CSF2	-1.90980018070514	0.81888491622762	0.0196903790079746	0.300077032270495	0.342359	0	0	0.133521	0.0675077	0.0844786	3.62458	6.10487	0.155566
ENSG00000081818.3	PCDHB4	1.11277251879835	0.477162034215253	0.0196973116958596	0.300077032270495	4.407697	2.03591	3.424663	0.735625	0.388089	1.69818	1.08991	1.03261	1.65599
ENSG00000146122.16	DAAM2	1.39741919334738	0.599323842749165	0.0197186055739477	0.300159424178976	68.0375218	59.3237449	45.9902402	9.1946767	4.02040020019309	33.2704132087	6.1401918993422	8.4483721	24.53456341125
ENSG00000243649.8	CFB	-1.61978069034271	0.694744932287006	0.0197283079188432	0.300159424178976	48.306532	39.581223	35.801314	147.425226	96.89999	62.72539	369.786931	1130.1244	70.54223
ENSG00000108797.11	CNTNAP1	1.57324665977791	0.67499678756948	0.019766710377286	0.300354140000976	67.270417	86.661547	71.4163527	2.574373	3.197212	24.82809	5.78282	12.46433	29.0740909
ENSG00000185803.9	SLC52A2	-1.0747466622116	0.461116222031308	0.0197665428380337	0.300354140000976	16.0481417048	13.0102158401	13.437309	35.2331770752133	36.8663991114779	24.8135320107432	71.7919930152874	72.4075960138684	39.0556820007783
ENSG00000165246.14	NLGN4Y	1.09555415313628	0.470245271004315	0.0198193420053154	0.300958953260002	4.972203	4.6609961395	4.95625205610309	1.699729	0.4857977	3.8317919	1.583507	2.114327826	1.6158809
ENSG00000160957.12	RECQL4	-1.42445128393556	0.612101849918525	0.0199574166429958	0.301094994919445	3.877698	3.0720657	2.4548474	18.396066	19.45255	8.847457	36.369028	36.986597	29.494804
ENSG00000261786.1	AC006058.1	1.26834093365057	0.544722436073925	0.0198899763793652	0.301094994919445	0.216849	0.0398986	0.282391	0.209496	0.105929	0.0711887	0.0494893	0.0448283	0.0843779
ENSG00000152672.7	CLEC4F	-1.49841221461452	0.64391590935886	0.0199636209894449	0.301094994919445	0.220907	0	0.0843129	0.258551	0.435774	1.08819	0.296637	0.326162	0.601785
ENSG00000214491.8	SEC14L6	1.27176612402087	0.54647353577725	0.0199533661381067	0.301094994919445	0.346382	0.304217	0.38419	0.6459155	0.0621193	0.397533	0.2633903	0.082033	0.100071
ENSG00000280537.2	AC068946.1	-1.28061649931657	0.550348090889503	0.0199694732575191	0.301094994919445	0.505357	0.0727417	0.167927	0.243129	1.02083	0.280261	0.6764032	0.9511472	0.410883
ENSG00000168066.20	SF1	0.611526455957441	0.262673431606918	0.0199075138476468	0.301094994919445	202.98154645186	256.633491872	220.291168003425	138.834200005436	112.914786	193.043892	173.651011441	111.823945003054	117.8795555805
ENSG00000154479.12	CCDC173	1.41186099360168	0.606520269100871	0.0199224535829205	0.301094994919445	0.5445989	1.846819	0.968213	0.530812	0.429307	0.299952	0.0973488	0.132211	0.622008
ENSG00000109332.19	UBE2D3	0.839372086383616	0.360699250736989	0.0199615869768735	0.301094994919445	164.078518001484	339.959888	171.04803280198	111.611331428058	72.589978	143.58373	139.454219	128.458593085259	100.015568748
ENSG00000266718.2	AC079336.5	-1.07979701860676	0.463734342976686	0.0198865298748751	0.301094994919445	0.1763384	0.1485308	0.291536	0.1997088	0.631397	0.375559	0.754977	0.4037492	0.200155
ENSG00000175182.14	FAM131A	1.15952831885805	0.498063679482054	0.0199082581621898	0.301094994919445	38.224044	46.738932	45.838259	7.400466	7.802528	27.003764	9.626998	12.265142	17.864019
ENSG00000272812.1	AC004908.2	-1.00431797008488	0.431410940481424	0.0199129282651193	0.301094994919445	1.9626	1.56084	1.36444	1.04712	4.43463	2.47353	2.64607	4.20987	2.10835
ENSG00000278535.4	DHRS11	-1.51487534814364	0.651299760018159	0.0200224739480823	0.301700232046217	7.479173	8.470682	13.222641	16.404929	118.648934	12.235875	38.851377	15.799803	15.182957
ENSG00000198814.12	GK	-1.28479462705909	0.552700124060966	0.0200945287452058	0.302591616746646	3.147211	5.273255	3.273142	3.1921053	8.956859	3.584767	27.537709	14.113395	3.214912
ENSG00000165078.12	CPA6	-1.83855951141659	0.791400155992814	0.0201698581170671	0.303531136167101	0.0606921	0.0750855	0.3375238	0.283454	1.00324	0.109923	2.8349087	4.13224	0
ENSG00000267149.2	AC011476.2	-1.90592250353852	0.820482985895001	0.0201830467145501	0.303534909596192	0.176827	0	0	0	1.26163	0	0.683672	0.528411	0.122219
ENSG00000272631.1	AC067750.1	1.36259850315727	0.586679673118385	0.0202028235099497	0.303637695302326	3.76238	1.77496	3.39338	0.401746	0.30002	1.63027	0.569345	0.275073	1.18656
ENSG00000144837.8	PLA1A	-1.31607933157766	0.566800980126553	0.0202360275175662	0.30374756339707	3.01026	1.64411746	1.135606	1.824966	1.12509	5.609035	4.345462	15.976706	3.02238
ENSG00000091137.12	SLC26A4	1.16871089119117	0.503332876748364	0.0202359364157685	0.30374756339707	1.449175	0.496438	0.602307	0.559887	0.11189367	0.393274	0.1781678	0.74496981	0.271505
ENSG00000076513.16	ANKRD13A	0.697242548830281	0.300320668105063	0.0202512384489889	0.303781525097013	46.555269	52.19667	28.21888	20.69508	18.11457	25.7044915	23.394151	25.815506	24.8722227
ENSG00000255495.1	AC145124.1	1.33578575516647	0.575510961310748	0.0202845169393286	0.303802668110075	10.8214	17.9528	11.8475	2.53287	3.62009	9.4304	2.03676	1.54219	2.71279
ENSG00000132854.18	KANK4	1.40267043773558	0.604361276927714	0.020291495713247	0.303802668110075	0.9307267	0.1709595	1.005536	1.2116331	0.1860221	0.7793833	0.2453745	0.1489028	0.0971014
ENSG00000100316.15	RPL3	0.717885393651971	0.309281264865603	0.020279240576595	0.303802668110075	2338.129015	2714.05145	2309.741193191	1833.98674207679	728.2812515	2290.291466	1651.302957	1086.093065	1737.111888
ENSG00000087086.14	FTL	-0.707034124246731	0.304674082537743	0.0203071215977889	0.303842716712835	2586.33	3076.76	1926.05	1668.61	3547.71	4260.38	3155.5	5881.93	3449.61
ENSG00000153130.17	SCOC	0.529567463739428	0.228236388158716	0.0203268872151034	0.303944615011816	46.228351	43.711353	45.310156	27.9562301	18.010786	37.69871	28.839529	29.734523	35.055654
ENSG00000249505.1	AC108673.1	1.4599333612493	0.629510289238604	0.0203865106387391	0.304641991143603	0.314414	0.405392	0.531338	0.122649	0.0413431	0.103345	0.100693	0.0910947	0.238009
ENSG00000270074.1	AC087203.3	1.1503688821617	0.496268111632625	0.0204471966734105	0.305354348284458	5.54749	4.14739	3.53214	1.48457	1.14186	3.67731	0.75212	0.895568	1.43097
ENSG00000173867.10	AC013489.1	0.933396499565063	0.40327511859774	0.0206381052753073	0.307191375017339	4.25312	2.78101	5.49676	1.581101	1.478428	2.83655	1.00627	2.05898	1.683702
ENSG00000153820.12	SPHKAP	1.83166867459926	0.791904288141389	0.0207230518178622	0.307191375017339	0.13698300148784	0.0220518	0.146442	0.017815000389881	0.0240212	0.022483100265919	0	0	0
ENSG00000223485.2	LINC01615	-1.84299959712021	0.796911938357135	0.0207404261552136	0.307191375017339	0.112375	0.108799	0.114117	0	0	0.333006	2.10713	0.851743	0.204319
ENSG00000272599.2	AC016394.1	-0.975049513326568	0.42136600756097	0.020666606283944	0.307191375017339	2.81349	1.627107	2.45703	2.928084	4.182275	2.984166	8.30952	8.67004	3.256471
ENSG00000180801.13	ARSJ	1.4075059580817	0.60854144511016	0.0207271935234239	0.307191375017339	3.641992	20.144806	6.030638	2.342013	0.925202	6.04045	2.4397932	1.52734	3.39975
ENSG00000284543.1	LINC01226	-1.82657313605889	0.789535923403684	0.0206964322945952	0.307191375017339	0.0460381	0.010074	0	0.1688474	0.0445581	0.5295749	1.743833	0.24669663	0.0512685
ENSG00000100483.13	VCPKMT	0.755985293884883	0.326493701396588	0.0205874048284075	0.307191375017339	10.284223	19.637421	12.032101	9.374064	6.162932	11.933619	8.49541787	7.204401	6.681617
ENSG00000043462.11	LCP2	-1.35443379358071	0.585096891663778	0.0206190603600199	0.307191375017339	18.142067	9.57456	9.702776	18.168636	10.8847228	19.32263	126.689367	66.240721	16.719972
ENSG00000235890.2	TSPEAR-AS1	-1.69472820449099	0.732081251115195	0.0206159143694131	0.307191375017339	1.308746	0.178175	0.0533787	0.205517	0.701465	0.155718	3.93824	5.22748	1.163868
ENSG00000148459.15	PDSS1	-1.31515561426923	0.568646186568168	0.0207345360625278	0.307191375017339	2.813887	4.775763	2.128239	6.946917	16.70569	3.771349	22.96099	16.587667	5.65842
ENSG00000171617.13	ENC1	-1.41841457687805	0.613204785407425	0.0207161926528645	0.307191375017339	4.403953	3.94416	2.092706	19.31851	23.821911	11.686479	56.630794	28.028141	20.8218954
ENSG00000069869.16	NEDD4	-0.594209005115313	0.256879509753506	0.020712646130206	0.307191375017339	32.6932598	24.0631739002466	25.2238257	23.49578575134	44.8833480012	32.857956753477	54.5222023724497	44.08512481	32.74692281
ENSG00000078081.7	LAMP3	-1.37115859986849	0.592636497386417	0.0206864499439636	0.307191375017339	1.26631	0.428185	0.224487	2.55669	2.92275	3.69526	4.46205	6.37787	1.95465
ENSG00000034510.5	TMSB10	-0.896526338997876	0.387779386438385	0.0207804692054061	0.30759027635838	1548.27	966.532	1003.59	1987.77	1353.78	2272.42	4288.68	4352.31	2557.44
ENSG00000146966.12	DENND2A	0.919369184305277	0.397702750794043	0.0207942581029772	0.307600308545995	11.541617	6.140645	11.386299	4.5947070001575	2.407909	9.32558500167499	4.03498	3.56318824525	3.270419
ENSG00000198826.10	ARHGAP11A	-1.19500249073531	0.517017663628702	0.0208142013714154	0.307701309624939	0.8983050105142	1.0266865	0.90716670422639	3.002871	2.4903315	2.01914735732	7.265003	5.9195381	3.684266
ENSG00000220205.8	VAMP2	0.643524070723156	0.278531004763205	0.0208648202096754	0.308061388885585	117.67681	80.48074	94.18691	56.02236	33.886565	91.20124	51.290486	51.89961	62.24095
ENSG00000122515.14	ZMIZ2	-0.710111838421967	0.307323974314261	0.0208533288432887	0.308061388885585	53.84972788117	32.80937643005	41.323646	55.62670249	66.0329138	66.324696213	134.145205368062	86.1151922923	59.858751639
ENSG00000277452.1	RN7SL473P	1.55576252574427	0.673463512391268	0.0208830732993155	0.308136970236001	3.99872	9.55148	6.38954	2.78428	0.355317	5.31055	1.74284	0.780647	0.406827
ENSG00000029993.14	HMGB3	-1.07006373355905	0.463611852807747	0.0209934293327065	0.30860078043523	4.579578	7.081083	7.610817	13.3711100478898	13.9612599526	8.80637	31.98671	25.94406	22.44699
ENSG00000155719.17	OTOA	-1.14696231268247	0.496835790586443	0.0209694542889519	0.30860078043523	0.126706	0.071936	0.22376	0.17697000617071	0.168551	0.35188790426888	0.3013869	0.42025400600188	0.7046628
ENSG00000260197.1	AC010889.1	1.15684440986945	0.501126383702136	0.0209719910365023	0.30860078043523	4.56507	4.48959	8.30017	1.7333	0.707566	4.19612	1.52454	1.34514	2.66479
ENSG00000276266.1	FP325318.1	-1.75569910753897	0.760603693209218	0.0209826316452005	0.30860078043523	0.0945517	0	0.0958589	0	0.421138	0.0466106	0.264967	0.328689	0.128827
ENSG00000115266.11	APC2	1.26812660759127	0.549256814233483	0.0209544318831921	0.30860078043523	0.8479498	0.204873	0.822529	0.1316729	0.2459417	0.294698	0.1185739	0.1249393	0.1074981
ENSG00000165186.11	PTCHD1	1.77232358998848	0.767731873349884	0.0209702892298301	0.30860078043523	3.59251	3.915	4.662192	0.10157	0.0739388	0.948442	0.017817	0.180792	1.40114
ENSG00000147003.6	CLTRN	1.4573654149089	0.631571427222667	0.0210256973784552	0.308881581838408	0.627734	0.911915	0.460663	3.00987	0.719374	0.499669	0.210048	0.24125	0.323698
ENSG00000069974.15	RAB27A	0.973251463316072	0.421873313968343	0.0210561775267945	0.309135782826112	24.318457	50.7168953	26.713906	52.7490976	23.3565880037725	26.331944	14.666363	23.403968	13.85706
ENSG00000273079.5	GRIN2B	-1.69499609102056	0.734823844036229	0.0210732258343836	0.309192589931504	0.0201996	0.00804781	0.0135017	0.0208088	0.0734263	0.0213331	0.338413	0.00434026	0.0226955
ENSG00000070081.16	NUCB2	0.551308882981698	0.239039395573164	0.0210909962909993	0.309259914989459	65.4749193	62.51196	75.91451	75.6471881	46.0688316	58.528833	43.567445	46.3984603	56.311624
ENSG00000187630.16	DHRS4L2	0.511504629553256	0.221948068407177	0.0211882002233023	0.309910452268638	22.851976	15.622669	23.7724410625055	16.46249	12.878455	17.907272	17.01788	10.810956	13.2783594
ENSG00000107372.12	ZFAND5	0.685618058697155	0.2974516205205	0.0211680659186515	0.309910452268638	107.390062	113.198336	178.628409	62.310204	51.94328	97.307143	81.674619	80.650314	62.647641
ENSG00000147434.8	CHRNA6	-1.89614799665099	0.822719491678912	0.0211815836554353	0.309910452268638	0	0	0	0.023452	0	0.0225062	0.1474618	0.399079	0.082974100491027
ENSG00000227885.2	AL590652.1	-1.38969715937558	0.602938499562169	0.0211736415373468	0.309910452268638	0.231894	0.0479695	0.050298	0.391521	0.4746887	0.5654205	0.440419	0.817553	0.616289
ENSG00000254721.1	AP000879.1	-0.849605587501608	0.368811343510197	0.0212433138176399	0.309943647683862	6.6197	3.878053	4.34496	8.53899	11.53146	11.02954	16.21047	7.72828	11.90963
ENSG00000130173.13	ANGPTL8	1.34335094294267	0.583000626250659	0.0212113326024809	0.309943647683862	2.095058	0.577501	1.362302	0.695186	0.339948	0.866523	0.209121	0.331646	0.3927303
ENSG00000256664.1	AC025423.2	0.723690583216577	0.314137477101827	0.0212373303130936	0.309943647683862	10.0183	10.6416	14.6039	8.20652	4.19359	9.10503	7.3722	9.37198	4.61988
ENSG00000270557.1	AC013731.1	-1.48458548163519	0.64444342747461	0.0212411323074316	0.309943647683862	0.588517	0.0711704	0.149265	0.688619	2.43721	0.580679	1.13213	1.59931	0.802143
ENSG00000151503.12	NCAPD3	-0.893025991197633	0.387788871329109	0.0212863569285107	0.310227294384156	4.2727829	2.889051	4.211658	8.2039964250439	6.6615073	8.6434541321	13.1412345604451	14.2602766128479	9.78273630217101
ENSG00000221955.10	SLC12A8	-1.63326943981217	0.709281511489	0.0212951802203895	0.310227294384156	0.4678434	0.574269	0.348299	5.1738469	11.430536	1.4130909	10.0363601596253	13.12625465	6.421464
ENSG00000143514.16	TP53BP2	1.19601610271515	0.519424096487995	0.0213024240762489	0.310227294384156	14.136696	56.220577	21.539697	6.55507	9.693612	11.04151	12.9640489478	8.726417	9.851425
ENSG00000064932.15	SBNO2	1.19722018215807	0.520117148687451	0.0213448775423413	0.31026776457303	62.370344	211.943476	106.405859	29.791012	26.951065	41.087237	51.589209	76.191587	25.957890762
ENSG00000138207.13	RBP4	-1.64789000690757	0.715877615897034	0.0213399200621595	0.31026776457303	0.490979	1.676543	0.581231	2.580245	2.422728	0.543995	13.33543	19.041435	2.003803
ENSG00000128272.14	ATF4	0.824260823950459	0.358024248536528	0.0213211568104177	0.31026776457303	502.614528	821.828584	660.10751	308.351759	185.435542	454.10866	312.5415	291.68797	449.974316
ENSG00000100784.11	RPS6KA5	1.23605744542764	0.537183906499013	0.0213919176472851	0.310758996856319	8.6887863	4.338976	10.90177	1.7314189	1.4738488	4.5351135	1.17144	1.2590071	3.860722
ENSG00000074582.13	BCS1L	-0.557689126257486	0.24247730152905	0.0214502452050729	0.310841270651921	38.615595	19.789886	27.846399	33.168263	42.452158	45.7719730580896	56.348483	49.0449033079093	39.855061
ENSG00000129226.13	CD68	-1.20322697103048	0.523015533289527	0.021416692063738	0.310841270651921	27.414358	21.58046	10.973297	64.837702	73.98535	64.19605	70.393736	159.37965	77.23318
ENSG00000285608.1	AL161665.1	0.676487433965813	0.294128150976002	0.0214496287453276	0.310841270651921	7.16033	10.2004	7.66102	5.01486	3.36178	5.55197	6.27354	3.68892	5.98636
ENSG00000104881.15	PPP1R13L	-1.33838476185276	0.581916949202679	0.0214505782867508	0.310841270651921	11.38031865	9.776006	7.82715602	17.822196	79.43339	9.591574	34.90182	26.067525	21.468008
ENSG00000138741.10	TRPC3	1.17153945588562	0.509591879231183	0.0215063071095946	0.311456463640864	0.615452	1.207855	0.486589	0.292825	0.1090426	0.2496111	0.230275	0.573534	0.26842
ENSG00000102904.14	TSNAXIP1	0.904071655922668	0.393308412019482	0.02152579367043	0.3115463573732	4.063930009	1.960375	3.5279936	1.036877	1.0347379	2.24319	1.095824	1.179942	1.383359
ENSG00000118513.18	MYB	-1.73391779946646	0.754461109138812	0.0215492566871758	0.311693656681771	0.13195700188348	0.61925260197419	0.2316253	2.6545724	6.61066173110541	0.6499982	19.9568229057	1.361338578825	2.757602
ENSG00000261357.1	AC099518.2	-1.88200959071884	0.819183759362158	0.0215947914416092	0.311967612076105	0	0	0	0.155478	2.12247	0.295265	0.576034	0.607109	0
ENSG00000211786.3	TRAV8-2	-1.82669599071479	0.795049930562392	0.0215853344890814	0.311967612076105	0.137214	0	0.13943	0.320988	0.108193	0.271272	0.397278	5.37757	0.873491
ENSG00000197093.10	GAL3ST4	-1.02948030965848	0.448167392788879	0.0216137031385962	0.312048670359758	2.709686	0.899471	2.250482	1.9110503	1.30077261452	3.59524700094287	6.1340174	4.336331	7.231895
ENSG00000188153.13	COL4A5	1.59432601116477	0.694877939034586	0.0217676927353554	0.3125769223159	107.360058	100.731525	84.929435	13.382497	3.850448	54.596857	1.72780059504199	8.8517574	28.244246
ENSG00000089250.18	NOS1	1.87978246970305	0.819175473049952	0.0217488868854959	0.3125769223159	0.61361790606	0.081183	0.94488449944	0	0	0.12829273729	0.0040271736266	0.020477493072	0.041971339165
ENSG00000283341.1	AC068205.2	-0.826027218077851	0.359976697011111	0.0217521244463855	0.3125769223159	0.805551	0.326446	0.526606	0.466334	0.799651	0.640097	1.62042	1.06084	0.993279
ENSG00000174165.7	ZDHHC24	-0.607090734380758	0.264567185313485	0.0217528342869757	0.3125769223159	5.47775	3.1203635	3.205549	5.230901	4.714848	7.46983	8.143603	8.137663	6.889894
ENSG00000257893.2	LINC02404	-1.88280867625031	0.82037483469776	0.0217297413248125	0.3125769223159	0.0508643	0	0	0.0396834	2.4078	0	0	2.34307	0.0462038
ENSG00000169715.14	MT1E	1.28163005293065	0.55839564305529	0.0217216269357637	0.3125769223159	61.41342	100.3457	569.571	259.6318	94.19322	97.67929	60.73448	132.530895	84.547221
ENSG00000147044.21	CASK	-1.12771585070766	0.491517913681787	0.0217702012303048	0.3125769223159	7.258204226	8.6898134	7.3357192	10.9010766	28.52902560759	7.8290068	31.4563984	30.3456953	9.620317478
ENSG00000067082.14	KLF6	1.15015700454487	0.501145660823226	0.0217299553755576	0.3125769223159	114.395692	313.7684	135.478289	58.932299	39.865267	81.719202	82.78468	118.261652	32.092109
ENSG00000101464.10	PIGU	-0.786774870254359	0.342765273348584	0.0217116376327633	0.3125769223159	11.5036436	10.109312	9.75016	9.47822	21.107655	11.5657018	30.2771331	18.760835	12.9933929
ENSG00000163535.17	SGO2	-0.994192646621698	0.433643718382876	0.0218682462575635	0.312822696496504	0.902317	0.48969	1.0122785	1.138161	1.361638	0.8348887	3.2880162	2.0305653	2.5665659
ENSG00000184205.14	TSPYL2	1.33688249167555	0.583289469848475	0.0219073223794278	0.312822696496504	107.975022	114.50965	208.01908	24.796861	13.111274	106.811965	19.978426	28.123524	38.732925
ENSG00000187953.10	PMS2CL	0.512647317178704	0.223562407950845	0.0218431857038063	0.312822696496504	8.981545	9.555821	8.936973	7.31713	6.28119	6.666567	7.147572	5.08061	6.64238
ENSG00000158486.13	DNAH3	-1.68327526672274	0.734303667527495	0.0218859059147787	0.312822696496504	0.71425915	0.0338009	0.15210371	0.40989201	3.8333432	0.16954276	1.8710705	0.6118996	0.6430231705
ENSG00000100614.17	PPM1A	0.43092344848691	0.187923223978757	0.0218432580750564	0.312822696496504	28.397125	23.241444	31.565175	18.925075	13.465434	22.474761	22.826823	18.32549	22.832775
ENSG00000117000.8	RLF	0.936916373226058	0.408542507594885	0.0218299167617278	0.312822696496504	5.90189	13.9707	7.16455	3.19778	3.00425	5.1573	3.98343	4.00542	4.18854
ENSG00000273173.5	SNURF	1.27464662831825	0.556124780677143	0.0219047476282199	0.312822696496504	8.30855	15.50525	5.26005	2.806159	0.925341	6.29523	1.659947	3.778576	3.283152
ENSG00000090975.12	PITPNM2	1.29091603065177	0.563083544757047	0.0218719965669994	0.312822696496504	13.360611	27.2292393	10.496511	2.98248739656	1.766099	11.8905532	4.4928828115	4.3647152	4.2243155
ENSG00000239521.8	CASTOR3	0.63255139759023	0.275781979074943	0.0218097643581724	0.312822696496504	10.109512	5.661366	9.887037	4.80718223393	2.7511936261	7.072881	5.499395	5.5291759	4.7736287
ENSG00000196950.13	SLC39A10	-0.935421318733505	0.408200892371744	0.0219304116907344	0.312961915253236	5.280012	2.603714	2.345587	3.314328	3.715037	6.212916	15.6533675	7.099114	4.319517
ENSG00000122490.18	PQLC1	0.785354198784951	0.342831719069845	0.0219757774803636	0.31322825970037	32.408523	52.080167	30.38149	17.8146584	13.7449364	28.902053	17.932054	19.9563016	20.3012494
ENSG00000149548.14	CCDC15	-0.922761134467501	0.40280983237079	0.0219743558448845	0.31322825970037	0.4469456633	0.349854	0.733747	0.7832909	1.525273	1.1074379	1.3506278	1.333898	0.8204910366218
ENSG00000154016.13	GRAP	-1.16408724378878	0.508251139123773	0.0219994118735959	0.313374743149019	3.872052	1.117362	0.925055	1.94109	2.1666695	5.512732	11.247241	5.277657	2.151429
ENSG00000010165.19	METTL13	-0.713644672820808	0.311655679891892	0.0220300295014561	0.313620462459746	16.100059	8.732994	11.024178	15.890881	24.384883	19.709828	30.637773	21.557811	17.456208
ENSG00000143382.14	ADAMTSL4	1.32945409652965	0.58076002543812	0.0220699100552369	0.313997671198249	51.526822	66.967426	48.313641	10.849455	3.681637	41.876099	8.517288	16.873903	12.126386306
ENSG00000271723.5	MROH7-TTC4	1.2985569089574	0.567396090013545	0.0221011467363548	0.314251517322194	3.192621	3.482782	4.502149	0.5580228	1.4429001	1.795994	0.4038393	0.5781439	0.8862742
ENSG00000176124.12	DLEU1	-1.0331598136223	0.451485168062531	0.022116666282233	0.314281712687745	3.121025	1.640095	1.649228	4.4674512	3.4745277	7.021376	13.211945	4.6478219	5.2089287
ENSG00000233559.1	LINC00513	1.57457236321944	0.688330938899458	0.0221653561224588	0.314782941881965	0.35491	2.53859	0.179853	0.415366	0.196021	0.0699589	0.545066	0.185009	0.225631
ENSG00000261684.2	AC018362.1	-0.784521640723576	0.343092251252344	0.0222180065044826	0.315339776528534	2.978314	2.163392	2.123229	2.864698	3.11824	3.33439	4.278893	7.51953	5.673409
ENSG00000242583.1	AC008040.2	-1.86058203239072	0.813786774966952	0.0222351816816202	0.315392743308641	0.197781	0	0.100391	0	1.45973	0.27992	0	1.319	0.176327
ENSG00000122707.11	RECK	1.16339571921664	0.509068689364287	0.0222928208711206	0.315447449009265	13.714828	17.02124	9.397739	3.725562	1.046203	8.519621	5.015418	3.926715	5.828693
ENSG00000153832.11	FBXO36	0.668422929177159	0.292452979555161	0.0222791920962131	0.315447449009265	1.430103	1.449688	1.625964	0.8564	0.881247	0.992102	0.921328	0.623021	0.8919049
ENSG00000157895.11	C12orf43	0.749272288527421	0.327847257281834	0.0222875673998949	0.315447449009265	11.396171	14.8028372	14.3618033	5.550513	5.062614	10.535606	7.051346	5.9355313	7.0313681
ENSG00000188404.8	SELL	-1.41593173741008	0.619429180197519	0.022262133551303	0.315447449009265	4.11311	2.0764191	1.20692	4.440637	1.36559	9.03459	26.988658	15.5435	3.489013
ENSG00000137767.13	SQOR	0.765719229040987	0.335226922058014	0.0223608496398475	0.316118881032948	50.945428	94.388522	47.259115	45.534252	34.958502	35.676035	33.89893	46.155989	31.886023
ENSG00000078043.15	PIAS2	0.830484834363669	0.363598143495284	0.0223672197482926	0.316118881032948	7.696221	9.938907	7.619177	3.5767543	2.3090958	6.716088	3.5273152	3.571039	4.9379567
ENSG00000119630.13	PGF	-1.12285865859327	0.491657214695238	0.0223818632082443	0.316135395983515	14.221081	3.6594263	6.185048	2.817863	5.282479	17.091634	25.014696	26.168636	9.378145
ENSG00000279353.1	AP001324.3	1.80664894736256	0.791515273535346	0.0224586949344629	0.316565182083131	39.6145	14.9942	29.4944	0.0957883	0.0645779	5.36531	0.275055	1.88469	7.28529
ENSG00000104921.14	FCER2	1.53617233116877	0.67305396401369	0.0224662643607866	0.316565182083131	0.644422	1.738445	0.119202	4.032475	0.3711504	0.660109	0.8103719	0.4382358	0.284828
ENSG00000267640.6	AC016582.3	1.48471115314509	0.65045664097616	0.0224558604238597	0.316565182083131	2.674912	1.666803	2.386306	0.178257	0.154322	1.2178899	0.166091	0.212012	0.758091
ENSG00000263588.1	AC091043.1	-1.84050128163207	0.806230733388744	0.0224393917976395	0.316565182083131	0	0	0	0.308555	1.2483	0.783592	2.10723	1.55297	0
ENSG00000131650.13	KREMEN2	-1.75635193032896	0.769654886204642	0.0224893801435077	0.316700688803622	0	0	0.0318708	0.13339	0.421406	0.0862758	0.0720755	0.6137432	0.246977
ENSG00000139835.13	GRTP1	-1.32487544572797	0.58087177330582	0.0225579296747166	0.317095019831352	8.541356	5.208923	10.81206	9.439302	29.99801	6.145802	65.42179	8.002493	22.096456
ENSG00000095383.19	TBC1D2	-0.747371260649025	0.327636363214634	0.0225425387196287	0.317095019831352	3.361444	3.416236	3.178312	4.691567180423	6.057188	5.65023612	9.6208597	8.617331	4.276395
ENSG00000112541.14	PDE10A	1.55799431613793	0.683022108325502	0.0225466373784033	0.317095019831352	21.4018359281118	16.4671314951711	8.00679082962	0.349314508348194	0.496801500506141	3.54215102806728	6.141276344941	1.944854831188	3.37513070177653
ENSG00000011426.10	ANLN	-1.3047402191375	0.5721972032491	0.0225941555391127	0.317280282705461	3.484775	0.571489	2.646705	6.131886	6.66782137816	4.2016865	10.947827	10.879872	17.042929
ENSG00000108175.16	ZMIZ1	0.703795915290449	0.308691530937944	0.0226116803496667	0.317280282705461	48.2807	34.711506	43.688201	16.9810383	12.4271145	31.427467	21.9641922599	23.077718	24.7904015
ENSG00000198130.15	HIBCH	0.465660856279838	0.204235115420374	0.0226062966085059	0.317280282705461	22.316728	15.6192575	23.66812	13.056605	11.380717	17.48044	14.4704	12.457498	14.391117
ENSG00000131375.9	CAPN7	0.656307522837218	0.28789653281417	0.0226275907473229	0.317313751657467	22.854069	20.861468	27.305083	10.419742	8.7120162	15.91944	12.037552	14.408667	15.658107
ENSG00000251493.4	FOXD1	-1.4990836810832	0.657687114181664	0.0226476627087735	0.317405504665791	1.10764	0.105165	0.0826914	0.297184	2.7521	0.906395	1.484947	0.519477	0.90851
ENSG00000227051.6	C14orf132	1.4593290325942	0.640411165891594	0.0226826654750842	0.317706277439374	29.371367	20.621766	28.13801	3.35173	1.05285	14.513	2.75948	2.48804	10.242379
ENSG00000089847.12	ANKRD24	0.719627484396123	0.315925974065327	0.0227363642721654	0.31807163416647	1.19337	0.8029493	1.112542	1.3249714	0.64771298	0.854845	0.494033	0.894923	0.603327
ENSG00000100307.12	CBX7	1.21605924225737	0.533970703305069	0.0227629799993821	0.31807163416647	98.351657	86.022442	98.872215	24.604534	12.592015	62.41561	14.723991	15.544855	50.032105
ENSG00000186871.6	ERCC6L	-1.58248371752716	0.694766105203841	0.0227431740179344	0.31807163416647	0.074584	0.0360245	0.10073	0.752856	1.13784	0.391783	2.126683	1.52188	0.756185
ENSG00000105880.6	DLX5	-1.69442374619458	0.743981942847212	0.022755994074581	0.31807163416647	0.3713057	0.11965466	0.354728	0	0.09765629	0.45997472	0.7922659	0.71819395	3.291298
ENSG00000226647.2	AL365356.1	-1.53783707993619	0.675457162231193	0.0228020447154986	0.318291276727115	0.202336	0.195725	0.0684137	0.0526132	0.7123695	0.0925335	0.6090613	0.39766	0.354213
ENSG00000255036.6	STRA6LP	1.03891644166121	0.456331232085505	0.0228058324955578	0.318291276727115	1.65568200020348	1.159038	1.520072	0.402866	0.279014	1.04598531359	0.368422	0.396266372333	0.724097
ENSG00000169155.9	ZBTB43	1.06290384993275	0.467148222801349	0.022887747140101	0.318909694085764	4.988718	20.409623	6.250523	13.671499	5.803329	5.126059	5.891114	5.742654	5.310301
ENSG00000233783.7	AP001442.1	1.73485986901915	0.762457110335167	0.0228846998741745	0.318909694085764	0.183012	0.3521899	0.0741965	0.384123	0.1109384	0.0360761	0.0702713	0	0
ENSG00000169100.13	SLC25A6	0.593894240020065	0.2610282799362	0.0228933152379406	0.318909694085764	440.903739	400.11487	448.806515	280.97485	152.1091	430.883994	267.330296	252.02623	280.983499
ENSG00000187566.5	NHLRC1	-0.854006848877161	0.375383735096939	0.0229045153460855	0.318909694085764	1.22696	1.23305	0.547004	0.785025	1.72328	1.69244	3.03665	1.89693	1.09189
ENSG00000105835.11	NAMPT	1.49860542806635	0.658882849686811	0.0229380935480259	0.319187789282465	103.613216	496.004809	213.613548	21.1680229	23.0772065	52.0542073	138.259335	93.223387	20.0433412
ENSG00000229052.2	AL449283.1	-1.26224568771843	0.555121638413243	0.0229769191768507	0.319349230336548	0.0313811	0.0303172	0.0794727	0.0969956	0.0980669	0.245718	0.2398184	0.149877	0.199454
ENSG00000134042.12	MRO	-1.05669120809576	0.464678848073892	0.0229644975951348	0.319349230336548	0.301812140555542	0.100701	0.158543	0.142145000882187	0.420891	0.229241000727459	0.64669800121466	0.219069600190063	0.4856262
ENSG00000230387.2	AL118508.1	1.30412092626568	0.573610372328229	0.0229942040932188	0.319400249988754	1.085771	0.4006155	0.3215788	0.2309621	0.0369744	0.35649	0.1901548	0.1717528	0.269125
ENSG00000196632.10	WNK3	1.11199339120061	0.489230795096192	0.0230296544973575	0.319703387078406	0.4259910246601	0.287558	0.431405	0.0679119	0.061448700448958	0.1984600135218	0.09217240611186	0.13520000737695	0.178815
ENSG00000242732.4	RTL5	1.34679954669142	0.592693418445933	0.0230661267788543	0.320020343204436	10.67507	15.92448	12.2603	1.898784	0.7968472	5.46	1.833941	3.020048	6.99546
ENSG00000142961.14	MOB3C	0.746118079826167	0.328424544991968	0.023098004384168	0.320143129114711	20.5351200160099	27.05777	18.8435	8.61687000060433	9.40004	14.84852	10.53263	11.487855408	11.3088406
ENSG00000163467.11	TSACC	-1.56286520105265	0.687959786843445	0.023102268342833	0.320143129114711	0.0911783	0.351933	0.2561071	0.0711167	0.5939929	0.1247050183	0.9031566	0.764525	1.148921
ENSG00000105373.18	NOP53	0.624421247306285	0.275075558202716	0.0232076425572139	0.32141351950106	405.57132	401.112395	426.3335113312	272.7550354	233.721893	367.032963	249.883518	167.100345	248.384573
ENSG00000198715.12	GLMP	-0.562283278875906	0.247808495675887	0.0232669020603077	0.322044123443586	54.328318	30.541157	39.203555	46.388959	42.86316	64.326831	68.991337	84.86759	77.681775
ENSG00000226383.6	LINC01876	-1.55157188522761	0.683934098217059	0.0232927515045347	0.322211817834839	0.1916157	0.069247	0.248725	0.3102349	1.1123609	0.1555394	2.389854	0.2491	0.6788212
ENSG00000186827.10	TNFRSF4	-1.26801691794305	0.559487777163213	0.0234275793211489	0.322460097229264	5.11416	2.189399	1.914301	6.711	6.58224	6.13927	9.27387	31.34054	7.15459
ENSG00000228663.1	PSMD10P1	1.3313812783506	0.587147328548219	0.0233571309585881	0.322460097229264	1.46213	0.606596	1.4845	1.05887	0.576543	0.412552	0	0.545306	0.379734
ENSG00000204394.12	VARS	-0.635361171886489	0.280165002710374	0.0233407511070827	0.322460097229264	23.9657221	32.539292	26.7441	32.0528	46.064448	38.701097	63.263714	51.394669	44.990695
ENSG00000242902.1	FLNC-AS1	1.85799962025302	0.819545796283016	0.0233835701886317	0.322460097229264	1.95837	9.35026	1.99013	0	0	0.691434	0.135023	0	0.890528
ENSG00000284644.1	AC074386.1	-1.13950525425733	0.502797097164128	0.0234310509876529	0.322460097229264	2.0118	1.144085	1.69919	2.3232969835	4.660785	2.331887	10.28398	3.92366	1.954698
ENSG00000279117.1	AP001972.5	1.12036045447598	0.494313325721699	0.0234208735477204	0.322460097229264	31.2426	11.5397	31.1745	4.94274	6.45461	12.8744	5.39096	5.37454	11.3236
ENSG00000272254.1	AC022893.3	1.76983656136459	0.780858605991431	0.0234191792071477	0.322460097229264	4.00522	2.04477	2.3609	0.164407	0	0.208822	0	0.367849	1.15202
ENSG00000279039.1	AC011447.6	-1.56414513394073	0.690031955481073	0.0234041558298871	0.322460097229264	0.0628729	0	0.0424659	0.0981161	0.297666	0.0825872	0.160802	0.436834	0.0761215
ENSG00000138075.12	ABCG5	-1.57701321386372	0.695860607823342	0.0234344003143896	0.322460097229264	0.070959	0.0342784	0.0179713	0.154386	0.2708601175	0.4420331	0.7577815	0.2004328	0.0322155
ENSG00000184911.14	DMRTC1B	1.3140346389556	0.57989078033224	0.0234511582788063	0.322501538323022	0.7962819	0.329529	1.189222714	0.97283	0.2148933	0.7236597	0.1439335	0.0819577	0.3641015
ENSG00000137809.16	ITGA11	-1.43551716124824	0.633820322426764	0.0235209945296306	0.32289412092432	1.832552	2.421891	0.978748	0.801723	0.629108	2.91925	16.513452	7.292172	1.9849
ENSG00000171130.18	ATP6V0E2	0.964170151194932	0.425677372096891	0.0235111077259259	0.32289412092432	47.347389	28.561009	33.456979	10.8622869179925	7.49384359	20.1806881013965	9.0271832	16.7716963	21.7664324993
ENSG00000143171.12	RXRG	1.61164047122872	0.711522491491021	0.0235090550256457	0.32289412092432	3.554053	3.9779	5.283525	0.8855136	0.1533228	2.951184	0.157144	0.11856	0.906875
ENSG00000172000.7	ZNF556	-1.46262525770631	0.645854228579746	0.0235349763138683	0.322897122397465	0.0394239	0.0152318	0.0399283	0.030763	0.05495814	0.0543539	0.1190909	0.0342276	0.316297
ENSG00000251034.1	AC037459.2	1.241573337525	0.548385015906406	0.0235707882555618	0.323010667794239	0.626689	1.91917	1.35197	0.688621	0.258965	1.27206	0.406425	0.224562	0.259034
ENSG00000101307.15	SIRPB1	-1.4555137837457	0.642843962572404	0.0235631092278869	0.323010667794239	0.4975782	0.1790664	0.61875500105772	1.268241	0.923327	1.9669	7.18405691982285	2.60634300087127	0.4442645
ENSG00000245385.2	AP003396.1	-1.84324967465803	0.814367549299379	0.023610274124524	0.323346161505182	0	0	0	0	2.25012	0	0	2.30843	3.73862
ENSG00000146054.17	TRIM7	1.17014754064593	0.517074250671426	0.0236346746023267	0.323346161505182	6.414567	3.3659975	3.797179	4.8479109	0.9316944	2.123743	0.5289638	1.877177	4.251941
ENSG00000177380.13	PPFIA3	-1.11688468790194	0.493544902273521	0.0236366168100843	0.323346161505182	8.99765923	3.578484	6.8305498	6.0079006	28.32298	10.8276651	11.9137997	6.7815417789863	13.98988
ENSG00000169627.7	BOLA2B	-1.10305954605343	0.487637419289081	0.02369440020449	0.323759070004392	53.97916	44.42976	53.227789	117.89436	181.44949	77.53279	137.85804	304.3061	145.1615
ENSG00000129473.9	BCL2L2	1.12393122323906	0.496839328960245	0.0236873746227817	0.323759070004392	69.360294	50.293476	80.413934	19.563228	8.658163	40.969657	17.082338	13.480428	40.841383
ENSG00000168995.13	SIGLEC7	-1.3443150802324	0.594660064911756	0.0237812719678555	0.32395274607174	1.183519	0.2503571	0.45671	1.386263	0.757564	1.57433	2.284543	6.872102	2.072961
ENSG00000135077.8	HAVCR2	-1.21700664480686	0.538453277487358	0.0238094691192506	0.32395274607174	3.250502	2.1399685	1.734694	3.3328	1.628243	3.984246	8.43421	18.409961	5.683927
ENSG00000187908.17	DMBT1	-1.86130161844109	0.823507637181451	0.0238081134141894	0.32395274607174	0.0269712646	0.00866566	0.109036776	11.08468	33.439147	0.114857373	98.32262	28.326684	230.858898
ENSG00000269001.2	AC092070.2	-1.36750999067393	0.604999479395945	0.0237995967905475	0.32395274607174	2.114402	0.267852	1.655907	0.728737	7.79106	1.811584	2.687463	2.99111	1.483727
ENSG00000006118.14	TMEM132A	-1.21012470249939	0.53527686012054	0.0237750270050469	0.32395274607174	7.449522	2.63135800071754	5.03114820609	12.1422881	7.4759218	8.782447	42.229519	23.588567459407	18.3935175026613
ENSG00000145075.12	CCDC39	-0.643244651816496	0.284645056433418	0.0238328476927592	0.32395274607174	0.453509	0.226157	0.366931	0.313652	0.494441	0.770742	0.650816	0.49273	0.429362
ENSG00000092148.12	HECTD1	0.567360137796839	0.250900657840821	0.0237410610817114	0.32395274607174	57.665865423	75.968590335	56.66861416	53.2301070001301	39.821176	51.54052644026	36.4228406716	42.800728	45.4452270141519
ENSG00000275097.1	AC024940.5	-1.56374178571504	0.691448041749021	0.0237254467565929	0.32395274607174	0.516336	0.735888	0	0	1.04516	0.861341	0.850917	2.13069	1.59186
ENSG00000102802.9	MEDAG	1.76379576648728	0.780504322362901	0.0238327039285439	0.32395274607174	34.2131	146.240337	5.92575	0.41486	1.27685	21.5001	11.087	7.91068	1.65834
ENSG00000131187.9	F12	-1.29850138813797	0.574700962124223	0.0238561317285155	0.324081474512277	0.3667793	0.3524292	0.7018399	1.319077	1.009336	1.50394	2.393405	1.156695	4.956601
ENSG00000189376.11	C8orf76	-0.611053862235315	0.270503427163379	0.0238864618148454	0.324305717961856	10.815942	6.858872	8.686411	7.189565	14.970403	11.111626	14.754500766	15.761019	10.148959
ENSG00000088881.20	EBF4	0.967194407541312	0.428274990633316	0.023923908075664	0.324438616972921	39.162717	31.967189	35.880327	13.978191	10.898271502	27.103287	8.70443	8.818857	20.501032
ENSG00000261335.1	AC005837.1	-1.70659744848445	0.755661871893755	0.0239198526500057	0.324438616972921	0.03427	0	0	0.0591056	0.13642	0.0337644	0.318218	0.0924131	0.187001
ENSG00000181649.6	PHLDA2	-1.44938911185515	0.641859669049563	0.023938863080291	0.324453880258063	2.96559	8.18765	2.21301	19.11798	46.09334	11.19241	29.97285	53.18793	15.140409
ENSG00000203392.3	AC105020.1	0.80432824036766	0.356261008968648	0.0239647614318855	0.324584220995341	2.88252	4.55363	2.69212	1.99487	1.36468	1.70406	1.80341	2.89557	1.29741
ENSG00000257767.2	AC002996.1	1.84909106084829	0.819167311303394	0.0239905025201769	0.324584220995341	6.5903	13.9543	24.7098	0	0.882271	1.56182	0	0	0
ENSG00000170965.9	PLAC1	-1.85882455984012	0.823450753105263	0.0239856066196284	0.324584220995341	0.0539780402	0	0	0	0.638791	0.0532289945	0	0.2345941486	0.1471026146
ENSG00000175581.13	MRPL48	-0.765981654642673	0.339370201644674	0.0240038201025922	0.324584220995341	17.350318	14.714859	18.826488	20.961964	27.9132645	18.20981788	50.485227	41.710864	30.029162
ENSG00000240857.1	RDH14	0.641175326048514	0.2841824133552	0.0240574554442084	0.325004318467977	27.7894	38.4712	28.6449	19.57378	14.45304	24.77388	24.11577	13.84026	20.06963
ENSG00000265107.2	GJA5	-1.08705503482176	0.4818232209168	0.0240625932900932	0.325004318467977	3.115754	2.2044	1.9286	1.5748600337708	1.72825	10.953786	8.4974300529883	5.084535	1.89690722
ENSG00000113916.17	BCL6	1.45223360085031	0.643878051441603	0.0241052093597949	0.325034991815124	63.167300205706	180.458851	132.94692903	8.639058	5.2577107	64.999233	25.4331040182899	28.599838	31.672597
ENSG00000204872.4	NAT8B	-1.57617554375127	0.698904758725601	0.0241202813499054	0.325034991815124	0.266761	0	0.090246	0.277429	0.771465	1.49216	0.256795	0.618825	0.242438
ENSG00000118507.16	AKAP7	0.635093546444156	0.281602016928323	0.0241152803261988	0.325034991815124	6.92316	5.04543	8.666216	4.619638	2.8296538	5.005808	3.744261	3.63325	5.816762
ENSG00000114854.7	TNNC1	-1.46227306567745	0.648280902757379	0.0240946623699026	0.325034991815124	3.026492	2.36506	0.793732	3.11092	3.711086	3.37759	2.25912	7.14335	26.407368
ENSG00000147853.16	AK3	0.69889742507257	0.309985807888887	0.0241577538068345	0.325166415411442	55.141715	49.874243	57.2071	27.30258	16.96293	45.850328	24.866588	27.842903	36.43191
ENSG00000234498.3	RPL13AP20	-1.47970000364711	0.656236161810587	0.0241440953284614	0.325166415411442	0.617449	0.119661	0.125389	0.866303	2.62791	0.976838	1.30916	2.47524	0.56207
ENSG00000031823.14	RANBP3	0.685008431319413	0.303965156301901	0.0242228856101339	0.325180102953509	86.505394	44.60432	66.81734328093	29.861600507	21.007705	45.979189408702	34.4632108139	34.1309360767278	44.694879
ENSG00000127241.16	MASP1	1.17189522502313	0.520059035987154	0.0242346429138407	0.325180102953509	3.9865708	1.1698319	1.867017	1.193137	0.7513921	0.8670498	0.3415374	0.38851042	1.6577532
ENSG00000178718.6	RPP25	-1.11912864052535	0.496664785715994	0.0242410163333272	0.325180102953509	2.11681	1.34639	1.46537	5.64336	6.69525	4.48064	9.62484	6.20415	7.76801
ENSG00000197162.9	ZNF785	-0.694332632877093	0.308166168146299	0.0242521409275425	0.325180102953509	6.81697	2.72338	5.629117	6.02909	7.33388	9.18849	11.057182	12.04029	6.69259
ENSG00000149798.4	CDC42EP2	1.13494891047647	0.503715544740199	0.0242494136213391	0.325180102953509	24.2209	50.1707	21.74	4.9921	7.36215	14.6018	10.7826	14.0817	9.66335
ENSG00000100033.16	PRODH	-1.59064205574335	0.705756752869459	0.0242080852271083	0.325180102953509	1.969548	1.3710781	3.522591	1.7577719	22.3068778	2.704266	2.626067	15.300013	0.57694412
ENSG00000166311.9	SMPD1	0.606381255370228	0.2691375647141	0.0242557938778671	0.325180102953509	32.280275	36.934366	28.450021	21.4781447	13.5994248	29.197127	22.277842	15.496393	23.27539
ENSG00000205476.8	CCDC85C	1.04059748852872	0.461969189001076	0.0242890680857799	0.325362876126799	34.7048619	16.387162	18.481194	9.9054	4.982086	15.5769078	5.400833	5.0466897	15.236521
ENSG00000131459.12	GFPT2	1.65478015704704	0.73467501148305	0.0242971637600337	0.325362876126799	15.49941	96.848873	18.801412	1.26061	0.5782725	16.494258	11.411615	6.740925	5.251925
ENSG00000233098.8	CCDC144NL-AS1	-1.19635762788393	0.531217980012797	0.0243157612218062	0.325426168867539	0.6106269	0.837006	0.408823	1.6771673	1.7581544	1.4866923	4.3377282	1.576141	3.7222221
ENSG00000185236.11	RAB11B	0.388459185255524	0.172556280960936	0.0243726947657723	0.325736531785608	138.158691	108.637398	110.617512	88.857376	57.628841	111.923703	101.725305	82.95122	98.52245
ENSG00000100445.17	SDR39U1	0.517789256952966	0.229998125756639	0.0243680628971885	0.325736531785608	75.742684	62.407742	64.548663	57.432433	35.078347	67.180677	40.7307768	40.642563	55.662672
ENSG00000197558.11	SSPO	0.933075776159896	0.414501771223732	0.024380603973212	0.325736531785608	1.270517	0.6433948	0.7139370867292	1.0407238	0.46664208	0.8422021	0.30806511	0.560278	0.2446099
ENSG00000172548.14	NIPAL4	1.74901640633614	0.777065241932004	0.0243983739174727	0.325788418029497	8.215264	36.692045	8.124748	0.4013767	0.1673489	6.770595	0.266495	0.7079389	4.388142
ENSG00000120616.15	EPC1	0.561645470184549	0.249710770354199	0.0245007917736766	0.326819239280876	22.9249465	24.179107	32.649167	14.4776408	11.25456	21.275575	19.804554	17.029757	14.996139
ENSG00000138346.14	DNA2	-1.13183433465776	0.503229274177505	0.0245034330120226	0.326819239280876	1.0886654	0.993785	0.969104	2.728595	5.508675	2.032068	3.407638	4.6800932	2.820884
ENSG00000164733.20	CTSB	-0.76072506815687	0.338550290308084	0.0246395427558961	0.327703125054466	273.480003	188.708518	208.3402536	148.7794982	170.2450206	267.0161313	411.770569	605.393734	436.04782127
ENSG00000176490.4	DIRAS1	1.50420202024332	0.669370137897508	0.0246278736347981	0.327703125054466	0.7003374	9.4425	1.70542	2.23807	0.65193	2.14966	0.179354	1.011846	1.37293
ENSG00000004468.12	CD38	-1.29750094223037	0.577331637160153	0.0246138312476678	0.327703125054466	2.049245	0.9637658	2.107105	2.398431	2.345556	2.2658417	5.860073	16.828689	2.236119
ENSG00000241769.7	LINC00893	0.835578295985187	0.37180095872298	0.0246157078733834	0.327703125054466	12.918857	15.11848242109	12.4773202	8.4405261184	6.6326002999	10.5611835621	3.269591	7.466986	6.7539966
ENSG00000166912.16	MTMR10	0.573260832024985	0.255104611726062	0.0246298153520375	0.327703125054466	14.1856396	14.038211	17.4266102	11.977666	10.6175675	12.6899214	8.7347813	8.4077869	9.511924
ENSG00000158373.8	HIST1H2BD	-1.48320053734408	0.660283709841026	0.0246842906066288	0.327953792329948	4.69146	2.31116	3.543169	9.521183	35.65093	1.951474	16.13833	32.4817	7.38893
ENSG00000143633.12	C1orf131	-0.88670051118995	0.394742493288996	0.0246863474385017	0.327953792329948	13.6305196	10.317404	10.384692	16.45881	32.1811923	14.949545	39.634715	23.5408	18.3127858
ENSG00000279365.1	AP000695.3	-1.79131638595413	0.797612827026558	0.0247138087498007	0.328132805364502	0	0	0	0.0925899	0.0505233	0.526218	0.427006	0.25771	0.0269416
ENSG00000271936.1	AC012073.1	-1.12714098852942	0.502048531233876	0.024762757960174	0.328539989706595	1.05156	0.214096	0.561221	1.25218	1.74658	0.927851	2.92507	2.02058	2.26247
ENSG00000198910.13	L1CAM	1.61230183899665	0.718265985321455	0.0247864874379043	0.328539989706595	28.518572	18.8896319	53.650676	1.5296481	0.41399800593056	15.330435	1.7104176	4.383971	8.5537078
ENSG00000160336.14	ZNF761	-1.1664749865621	0.519646400713175	0.0247843433985623	0.328539989706595	5.018046	4.883195	4.7025600671055	4.39165	25.156353	5.686431	10.0990156764	11.179316	5.225082
ENSG00000265763.3	ZNF488	-1.52595895772271	0.679872620523037	0.0248016800609491	0.328555740208881	0.174283	0.0459203	0.11235	0.506875	1.216283	0.330422	1.063399	1.6815600007278	0.14386
ENSG00000234072.1	AC074117.1	-0.901538209131325	0.401778133513757	0.024840717437122	0.328764466252847	6.643879	4.027311	4.50524	7.95436	12.270076	7.099745	19.38205	14.24369	7.341775
ENSG00000175727.13	MLXIP	0.77221956742798	0.344157493711251	0.0248454626259025	0.328764466252847	83.6337054	68.1177762	88.157452	28.2179603	31.6542961	48.5188247	42.616588	25.9768754	48.5131578
ENSG00000047188.15	YTHDC2	0.52913804165703	0.235913576959804	0.0249012188051449	0.329130982753524	10.079781	12.1819804672242	14.0565814	7.551661	5.6012165	10.5149304	8.1603179	8.118513	7.9293552
ENSG00000224204.1	PHEX-AS1	1.84099387951671	0.820742723301353	0.0248914761043035	0.329130982753524	0.0883746	0.341636	0.388073	0	0	0.0290285	0	0	0.0802561
ENSG00000277840.1	AC026368.1	-1.55078815339038	0.691507541833506	0.0249213751563277	0.329211927107323	0.205042	0.0992402	0.416339	1.35927	3.23411	0.506201	2.46903	4.3714	1.30464
ENSG00000215190.9	LINC00680	-0.778600020163275	0.347231763955063	0.0249415738874473	0.329293339883737	3.352817	3.209552	5.597456	3.863421	8.116768	7.93081	7.1366657	4.4126969	9.0522497349
ENSG00000119535.17	CSF3R	-1.42128756168744	0.634003978860911	0.0249766019383397	0.329570336375359	14.955934993	7.725411	6.883097	6.1553919	6.039299	10.961331	108.957752559647	32.457491	8.6637670441533
ENSG00000160256.12	FAM207A	0.793491704126801	0.354097771053666	0.0250336494652702	0.32995193826107	33.550553	36.524148	20.823936	10.35043	11.92203	15.166025	14.792899	15.671147	16.271334
ENSG00000103241.6	FOXF1	1.30674136453976	0.583089138959918	0.0250217868021945	0.32995193826107	92.1933	24.7447	82.183	8.98776	6.49391	23.4528	8.96574	16.3325	34.5543
ENSG00000126709.14	IFI6	-1.06393847571061	0.475116428131551	0.0251349990285063	0.330377168560302	283.46108	53.871218	108.106938	105.76499	467.95249	214.66686	230.68881	295.32838	265.58768
ENSG00000166451.13	CENPN	-0.900369928756158	0.402024609930281	0.0251176118988282	0.330377168560302	4.0999884	6.406833	5.454907	7.468302	10.612883	5.709583	14.6818953	17.073522	13.874812
ENSG00000114853.13	ZBTB47	1.28505773199002	0.573785299534904	0.0251159769349062	0.330377168560302	31.4547	40.1229	28.145	4.84954	2.249947	17.00907	6.987	7.04255	16.42554
ENSG00000225648.5	SBDSP1	1.21776203137952	0.543874215551966	0.0251526069276265	0.330377168560302	49.77125	103.23873	90.48353	15.183821	10.667557	48.82633	18.05873	16.348293	39.44977
ENSG00000066032.18	CTNNA2	1.64824426745563	0.736142758404402	0.025154092650605	0.330377168560302	1.3992173	0.4183519	1.5268639	0.2837974	0	0.267409	0.367202	0.0168385	0.3694263
ENSG00000204604.10	ZNF468	-1.12078269089732	0.500602328499515	0.0251644857515562	0.330377168560302	7.208938	4.208283	4.746079	5.985641	25.312464	5.816719	13.382044	13.623772	6.416197
ENSG00000169306.9	IL1RAPL1	1.31912426266363	0.588947426462967	0.0251039300824701	0.330377168560302	0.188446	0.1308467	0.381779	0.11311	0.068631	0.0856686	0.0138978	0.0784062	0.1229262
ENSG00000160951.3	PTGER1	1.26067824735193	0.563162500233816	0.025183957866414	0.330447894577148	7.12045	3.0638	4.33899	2.44055	0.389688	4.90924	0.948465	1.21598	0.934575
ENSG00000271874.1	AC025754.2	-1.64108434388823	0.733597766835225	0.0252840113038865	0.331205019095746	0	0.208754	0	0.335682	0.339586	1.70549	0.625661	1.31444	0.588068
ENSG00000271781.1	AC026740.1	-1.3662992488571	0.610714459213792	0.0252723235457365	0.331205019095746	0.425053	0.411308	0.517619	2.1219	2.68206	1.17468	2.86361	2.58807	6.10326
ENSG00000227256.1	MIS18A-AS1	-1.46142781349292	0.653278511145548	0.0252819599429579	0.331205019095746	0.0882958	0.170894	0	0.275481	0.557126	0.784404	0.339976	0.384042	0.481467
ENSG00000132591.11	ERAL1	-1.06448088968895	0.476074013509494	0.025354606326709	0.33175929672667	24.507828	20.830195	25.196224	29.352211	57.69293	26.75329	145.671474	42.579682	33.1595
ENSG00000131435.12	PDLIM4	1.51256843044119	0.676463824655809	0.0253522244863627	0.33175929672667	152.21786	435.0881	286.8364	22.493536	11.65846049	148.95319	31.01744	26.295314243	108.416659
ENSG00000220793.5	RPL21P119	1.34404093676509	0.601189798311243	0.0253756919506259	0.331850116417856	1.17843	1.25039	1.80331	0.79785	0.363709	0	0.538246	0.407765	0.863326
ENSG00000137573.13	SULF1	-1.49576120284368	0.669198771080054	0.0254073488211965	0.332079003172195	22.699117	33.12172	15.20524686	3.3629459	2.3282919	79.463843176	121.323998	103.0275689	79.66022575833
ENSG00000283440.1	LINC01260	-1.23733163313611	0.553926887157443	0.0254998302928296	0.332291048175394	0.694486	0.303425	0.318152	0.53839	0.29697	1.11843	3.46608	1.37891	0.911963
ENSG00000185760.15	KCNQ5	1.40858690049882	0.630631607483233	0.0255085536747745	0.332291048175394	1.14500243672	0.181695	1.23421	0.185074000939994	0.052563	0.3924254	0.063840500257299	0.2799561	0.287259
ENSG00000182687.3	GALR2	1.75735988096216	0.786463122077035	0.0254495210988461	0.332291048175394	0.345392	0.0417401	1.05039	0.101054	0.0340638	0	0	0.15007	0.117643
ENSG00000178175.11	ZNF366	-1.20323991697851	0.538692589964364	0.025507429857025	0.332291048175394	0.678401	0.160498	0.715235	0.637384	0.677344	3.32736	1.638794	1.7552	0.439972
ENSG00000262979.1	AC124319.1	-1.63773686240553	0.733140922187087	0.0254920454141795	0.332291048175394	0.443549	0	0.112603	1.38367	1.92383	0.766697	3.41983	6.46634	1.10886
ENSG00000091138.12	SLC26A3	-1.84024167285278	0.823680065695761	0.0254718591821333	0.332291048175394	0	0	0.133834	0	1.80188	0.130138	0.470485	0.622183	0
ENSG00000261578.1	AP003119.3	1.21742758846937	0.545253582229426	0.0255639041123049	0.332300842762088	2.30387	0.571597	0.216786	1.24759	0.347701	0.260393	0.639647	0.557503	0.331486
ENSG00000272630.1	AL731563.3	-0.850970431374468	0.381352301298778	0.0256510169604678	0.332300842762088	0.465837	0.207724	0.145206	0.181742	0.480684	0.511836	0.463886	0.575694	0.374177
ENSG00000135899.17	SP110	-0.581091795533913	0.260453251573972	0.0256758925886492	0.332300842762088	21.81471802	13.199918	15.686235	14.31107675099	19.679178	21.1676180404579	28.138872	39.278878	21.0073563
ENSG00000169607.12	CKAP2L	-1.46006231110638	0.653839291403573	0.0255449936846193	0.332300842762088	0.289726	0.0430694	0.2709616	1.18249	1.263686	0.680665	2.903122	1.72304460087	2.543792
ENSG00000149294.16	NCAM1	1.63996407741	0.735083006152504	0.0256816795433045	0.332300842762088	50.706878	27.5547607001204	68.8111230049503	3.96436016959	1.24672004444	23.4220826016263	1.196734	1.093089193	14.3673263
ENSG00000124224.16	PPP4R1L	-0.754863479929629	0.338176335974541	0.0256044311186715	0.332300842762088	4.874015	2.0896526	4.3824046	4.7238814	5.415628	5.9665588	9.718897	10.6262305	5.3809515
ENSG00000198142.4	SOWAHC	0.8824407418889	0.395563612988783	0.0256914593443632	0.332300842762088	9.16741	13.6047	13.5	4.45215	5.27647	6.9077	6.15027	2.96656	6.38842
ENSG00000125772.12	GPCPD1	0.628882027878081	0.281784903796574	0.0256294797519197	0.332300842762088	25.64894	30.928093	23.885241	15.288725	10.059457	22.285553	18.486542	12.841027	18.425181
ENSG00000125247.15	TMTC4	-1.09220264623257	0.489571864143241	0.0256854837053337	0.332300842762088	6.421702	2.8040221	4.897529	5.773792	6.431376	9.330509	32.800638	5.530181	9.587925
ENSG00000245149.3	RNF139-AS1	-0.905176493719647	0.405681481335743	0.0256646244852035	0.332300842762088	2.182333	1.4634566	1.182256	2.041458	2.385041	1.85566	6.048715	5.277375	2.6941415
ENSG00000008517.16	IL32	-0.987601782847657	0.442226204005651	0.0255324459432377	0.332300842762088	176.35292893443	120.63537727845	111.34718	213.957268	181.941891	173.9893234772	484.646579	672.978298	289.935007
ENSG00000162174.12	ASRGL1	-1.18310865671307	0.530222280678164	0.02565830727323	0.332300842762088	5.756398	5.312063	5.532479	16.004808	37.268942	20.61767949176	18.621063	22.977511	9.623448
ENSG00000164484.11	TMEM200A	-1.33228327230744	0.597218386030823	0.0256934371412313	0.332300842762088	1.160941	1.3499046	0.490462	1.35265400196576	0.7052616	1.522464823	10.971065	3.0889107	2.739036135638
ENSG00000109674.3	NEIL3	-1.59135721536423	0.713671211171299	0.0257594997551468	0.33248577518574	0.045522	0.0219933	0.0767129	0.513781	0.392572	0.29152	1.3054901	1.694736	0.661387
ENSG00000080166.15	DCT	1.4082596870069	0.631531632752005	0.0257533149411982	0.33248577518574	0.7836892	0.369289	0.355823	0.16658615	0.0412886	0.3799121	0.03578861	0.0310085	0.1615078
ENSG00000114654.7	EFCC1	0.948978876192037	0.42559986752983	0.0257644234809972	0.33248577518574	14.33844	10.68883	9.86385	5.76036	3.80937	7.33024	2.023992	4.48486	8.02943
ENSG00000204525.16	HLA-C	-0.901284847095938	0.404189877028185	0.025757065929661	0.33248577518574	351.261284	181.004391	157.0692934	363.312068	513.836577	275.588313	692.044682	589.481969	635.13719
ENSG00000186732.13	MPPED1	1.78475859992972	0.800775223420072	0.0258279812278473	0.332793691903653	0.15249	0.0140444	0.3382106	0.118984	0	0.0429234	0	0	0.0658008747
ENSG00000183873.15	SCN5A	1.19856977781073	0.537777752181093	0.025830838964944	0.332793691903653	0.187888758040397	0.189252870675979	0.2115495322	0.078772070068314	0.02936595727	0.193031000451772	0.0276412	0.0430759217857359	0.07284290967821
ENSG00000168621.14	GDNF	1.12581290225642	0.505093379907497	0.0258192062813155	0.332793691903653	2.369442	3.37512174	1.61083000105739	0.85547900212817	0.3709776056481	1.028534051959	1.70980033	0.368101881	1.222236193134
ENSG00000171503.11	ETFDH	0.721705723185815	0.323959321071398	0.0258960898033073	0.333081625414014	25.25826	27.747156	32.622071	26.68817	14.471131	25.85202	12.099587	12.99144572318	23.19503
ENSG00000102981.9	PARD6A	0.870518774388623	0.390795038793911	0.0259099768288042	0.333081625414014	9.17128	9.0065	7.758637	3.000783	1.986369	5.571727	3.927111	2.978326	5.65735
ENSG00000186462.8	NAP1L2	1.66331627311644	0.74662427382284	0.0258950418821005	0.333081625414014	8.44735	21.1183	5.78506	0.65078	0.269996	4.57192	0.123068	1.1144	3.7479
ENSG00000196408.11	NOXO1	-1.7106818337301	0.767949817710719	0.0259074770720324	0.333081625414014	0.3709233	0.107356	0.22527966	3.2484055	8.385006	0.3217355	13.935925	9.60588	1.762945
ENSG00000124019.9	FAM124B	-0.962643095796381	0.432214392230604	0.0259315606827846	0.333176530766051	1.883661	0.3482974	0.8559521	0.5852333	1.201506	3.124682	2.329383	1.690911	1.33043
ENSG00000163346.16	PBXIP1	0.880504992620299	0.395407310313408	0.0259586152947903	0.333284989055066	156.000981	132.927925	184.43427	53.512057	48.753597	109.30172	43.45821	62.29635	92.14965
ENSG00000147724.11	FAM135B	1.71653006930525	0.770890806441809	0.0259684139632863	0.333284989055066	0.0743235	0.129219	0.489279	1.1079952	0.228734	0.0585537	0.0569835	0	0.0472342
ENSG00000178773.14	CPNE7	-1.62056606713967	0.727908390903189	0.0259919218275067	0.333404307269073	0.833884	0.2061274	0.987095	5.947339	8.419981	1.771156	29.007956	3.546385	12.725583
ENSG00000260643.2	AC092718.3	0.844726178105739	0.37964947771799	0.026080161272061	0.333655303857768	2.349507	3.852651	3.532495	1.353559	1.644428	1.708319	1.262623	1.579142	1.531909
ENSG00000272968.5	RBAK-RBAKDN	1.44134366119208	0.647806945418594	0.0260840147317651	0.333655303857768	0.345145	0.420873	0.209476	0.631918	0	0.22580251	0.11435	0.199932	0.217374
ENSG00000137815.14	RTF1	0.356461226862049	0.160220465777488	0.0260935211399724	0.333655303857768	27.764737	27.494569	24.720093	21.267334	14.208959	25.486703	22.362095	22.876804	20.91522
ENSG00000251179.1	TMEM92-AS1	-1.22976865542042	0.552762660654296	0.0260968195123398	0.333655303857768	0.45672	0.26521	0.0927116	0.284983	0.936568	0.541039	0.615601	0.635726	0.913199
ENSG00000145604.15	SKP2	-1.13398857005354	0.509612802038787	0.0260680567476011	0.333655303857768	4.27868	1.0070687	2.310689	4.4092851	3.885855415	4.256441	17.899248	7.6704301	6.194366
ENSG00000274925.1	ZKSCAN2-DT	-0.890643940421841	0.400193649377552	0.0260455173192292	0.333655303857768	1.60339	0.982755	0.838347	1.92373	3.08818	1.86815	3.73624	3.18902	1.86289
ENSG00000204403.9	CASP12	1.14213835487303	0.513591019955664	0.026159984149911	0.334280712495132	1.8297239	1.572243	0.7242306	0.4205534	0.5492804	0.7377785703	0.231418	0.3834529	0.4868387
ENSG00000162396.5	PARS2	-0.608100232218312	0.273570082576721	0.0262271554811355	0.334956611182863	2.17691	0.814268	1.423	1.04106	1.69924	2.16784	2.62702	1.99239	2.35939
ENSG00000018189.12	RUFY3	0.908515874486063	0.40878312473822	0.0262502970201348	0.334990444588102	41.00908312968	86.68977	36.909208862	23.456959	14.2427937	37.139228	26.50529649038	24.339113	29.0966335342
ENSG00000137699.16	TRIM29	-1.6128827103085	0.725781605391538	0.0262650622372422	0.334990444588102	0.8394339	1.8009124	3.2527025	5.86978320309145	9.1802186	0.9653135	50.074854	2.3030099	17.5828979
ENSG00000217275.2	AL031777.1	-1.82893698093473	0.823045486312823	0.026272640468953	0.334990444588102	0	0	0.170657	0.392549	1.72019	0.16603	0	10.9696	0.610758
ENSG00000187122.16	SLIT1	1.21462128064743	0.546775679240555	0.0263221747875899	0.335439729870531	0.561298	0.335548	0.395331	0.1349802	0.2728473	0.0768796	0.143398	0.1599895	0.0472521
ENSG00000105656.12	ELL	1.00545428756714	0.452712647519603	0.0263540289647991	0.335481211906214	11.1256478	34.3460612	10.419651	8.575684	5.615112	9.4558005	10.944694	9.66078	6.229346
ENSG00000245468.3	LINC02447	1.41272066428734	0.636046985149497	0.0263445397871144	0.335481211906214	1.2701993	1.978257	0.3788178	0.31201	0.0813795	0.3430656	0.3216775	0.1120411	0.67393
ENSG00000136848.17	DAB2IP	0.944034002851614	0.425108759949604	0.0263720878713961	0.335529042055762	41.983517	86.4331884	48.96582	18.540395	21.790582	36.961006	23.9043851	18.620361	27.5120192
ENSG00000138678.10	GPAT3	0.984003479634761	0.443233580521205	0.0264149496719033	0.335892213687005	6.665922	9.3744560045025	3.6774681	3.65456	4.465879	2.63674400179263	2.656299	2.0730567	2.237216000291
ENSG00000173120.14	KDM2A	0.609214443475647	0.274582270942069	0.0265074487359919	0.336333612111442	46.275345	75.902569	59.759522	37.257567	26.783904	47.651897	38.6894806	39.872561	38.4434295
ENSG00000121281.12	ADCY7	-0.761295677557374	0.343088057315323	0.026490040513717	0.336333612111442	5.4594942138	3.444532542435	3.194477954932	6.546869	6.6877	7.5795672	8.31056518205	13.0719969922	8.058395120394
ENSG00000071242.11	RPS6KA2	0.640356469471022	0.288548375957257	0.0264707848458283	0.336333612111442	24.690446	22.225558	17.850048	12.9939824	7.6395662	20.579231	12.462	10.6706853	14.3176977
ENSG00000256802.2	AC022613.1	-1.55064683351403	0.698964525935043	0.026521341051369	0.336333612111442	0.194123	0.208412	0.196677	1.755304	5.44926	2.081903	1.079911	3.286825	0.999134
ENSG00000080986.12	NDC80	-1.37678903664559	0.620530273649248	0.0265051094594845	0.336333612111442	1.6415299	0.270897	0.826324	3.865284	1.8570991	3.22373	7.230658	9.42204	8.340902
ENSG00000123444.13	KBTBD4	0.666188043642094	0.300327815704401	0.0265409984072165	0.336401060849112	12.008282	9.10003	14.05356829512	5.245462	4.11142913	9.5870036	7.463595	5.441855281	6.4362514
ENSG00000196812.4	ZSCAN16	-0.679727293088332	0.30674133912407	0.0266940730845086	0.337110723060543	4.22756	3.0542	3.34218	4.34492	6.46742	4.78639	9.66936	5.65254	5.90812
ENSG00000204677.10	FAM153C	1.51038924916288	0.681494388874249	0.0266716424273752	0.337110723060543	5.54055337	2.2875684	2.10125572	0.209209	0.29902563	1.6358677	0.131463	0.847587	0.3838668
ENSG00000111537.4	IFNG	-1.73849126682058	0.784253463486451	0.0266404065017465	0.337110723060543	0.345558	0	0.200203	0.231085	0.116843	0.146022	0.995841	5.74919	0.224208
ENSG00000267934.1	AC010300.1	0.624723840332477	0.281967123595649	0.0267195211800167	0.337110723060543	0.77413	0.482119	0.69123	0.397407	0.32151	0.591869	0.419825	0.327224	0.314432
ENSG00000110429.13	FBXO3	0.639020792731967	0.288432898080301	0.0267263094025237	0.337110723060543	27.3664083	19.6594892	25.1402666633	12.345683	10.6604155	19.735302	11.9147913219136	10.5691421999	16.5164153
ENSG00000203666.12	EFCAB2	0.901546434498037	0.406738646046025	0.0266555580671747	0.337110723060543	13.386673	9.148918	14.5860295	3.4823701	3.0782669	9.062886	5.504011335	6.069679	3.61329
ENSG00000141696.12	P3H4	-0.900780056299882	0.406382818862334	0.0266518008638339	0.337110723060543	10.660275	3.5833179	5.793975	6.880438	9.867483	7.7925119	19.352228	9.935125	21.095817
ENSG00000139269.2	INHBE	-1.31315519769342	0.592398937793691	0.0266453912027019	0.337110723060543	0.112733	0.0653581	0.0913748	0.158331	0.0711625	0.222132	0.7054037	0.215404	0.57326
ENSG00000141526.16	SLC16A3	-1.02500812348203	0.462586179324029	0.0267037706070263	0.337110723060543	18.163439	18.5548790010154	9.581798354	20.3638440032823	34.260468	13.8734480019508	57.9409667	63.0874570080454	27.0000327536
ENSG00000187837.3	HIST1H1C	-1.38594864369854	0.625750478382782	0.0267697917817749	0.337186844124394	24.8882	16.2847	16.5038	46.1754	84.0638	35.5867	38.5591	267.082	26.7588
ENSG00000281005.1	LINC00921	-0.953274501693622	0.430653855689151	0.0268596446528912	0.337186844124394	0.886355	0.385401	0.695971	0.743466	0.979146	3.10739	1.63654	0.808301	0.985951
ENSG00000163596.16	ICA1L	1.19749612770173	0.540750354381225	0.0267938349626332	0.337186844124394	13.245897	10.4205690133962	15.5789875	3.4120338	1.7101317	9.5245766	2.2977039	1.9374109	6.3462508
ENSG00000168785.7	TSPAN5	0.694425561681798	0.313646760258198	0.0268262273108743	0.337186844124394	13.289091	7.1011769	8.539028	8.980664166	3.132211662143	7.118081	9.235112	4.104301	7.29706087968
ENSG00000133422.12	MORC2	-0.514126467120599	0.232247172668278	0.0268491559009562	0.337186844124394	21.20707	10.623401	16.38917	12.725482	17.090668	18.45816	30.28782	25.604113	23.142026
ENSG00000066279.17	ASPM	-1.63033232723689	0.736539938358072	0.0268630834975252	0.337186844124394	0.3151603	0.00908392	0.1435247	1.484894	1.907701	0.89937	4.18872	2.797213	3.945973
ENSG00000235016.1	SEMA3F-AS1	0.431979430034691	0.195173212799309	0.026876066600427	0.337186844124394	5.4442	6.1741	6.08117	5.41217	3.86614	5.15501	5.36813	4.37607	4.05059
ENSG00000260589.1	STAM-AS1	-1.12998990792118	0.510476767188382	0.0268565047790656	0.337186844124394	0.251807	0.202752	0.0850383	0.245598	0.331154	0.186054	0.885522	0.82009	0.381084
ENSG00000260822.1	AC004656.1	1.16796690471843	0.527650064278351	0.0268614329620338	0.337186844124394	19.7073	16.3696	24.643	4.1519	3.06347	11.4079	7.34111	2.22268	10.0557
ENSG00000178252.17	WDR6	0.496216091768243	0.224113350985949	0.0268198380827076	0.337186844124394	146.259542	108.048033	156.4931696	102.904195	67.089433324273	144.402767	90.941026	86.045537	91.860326
ENSG00000152977.9	ZIC1	-1.81915641274335	0.822071342450851	0.0269049820184766	0.337196011361883	0.00996972	0	0	0	0	0.00981868	0.1798431	0.00865612	0.269451
ENSG00000102290.22	PCDH11X	1.5943960061076	0.720505433326684	0.0269055425288541	0.337196011361883	0.087458906	0.0118858	0.0282411715	0.053824621	0.0173693	0.0108409	0.0053831163	0.01463054	0.00140103
ENSG00000179477.10	ALOX12B	-1.68422068332586	0.761218290137051	0.0269298499291411	0.337320453383651	0	0	0.268969	0.0384011	0.15503752	0.267401	0.54619	0.54868195088577	0.10285
ENSG00000001036.13	FUCA2	-0.712924020916788	0.322280249561365	0.0269580669247444	0.337493707642171	29.396563	21.088145	25.965571	34.019276	38.017958	33.131423	59.167555	76.1247	42.176708
ENSG00000198574.5	SH2D1B	-1.23060913222524	0.556718447697733	0.0270725970656459	0.338385828320254	0.2630224	0.125424	0.131513	0.101284	0.802329	0.191824	0.249	0.356998	0.333964
ENSG00000274092.1	AC106739.1	1.49007469524289	0.674013286198444	0.027053172220885	0.338385828320254	3.7925	9.21293	5.26186	0.152161	1.53868	2.22196	0.488769	0.848745	1.36439
ENSG00000279981.1	AC018445.4	1.20289881415429	0.54416345935868	0.0270672336703109	0.338385828320254	0.432621	0.34837	0.243522	0.0937663	0.0568938	0.189441	0.161387	0.125252	0.0436503
ENSG00000182492.15	BGN	-1.34766998753111	0.610506263324934	0.0272817291934764	0.340589301865769	151.397375	83.005684686	56.111334	14.157528796	25.4770651	205.257452	495.3299628	289.83003	229.585057
ENSG00000027001.9	MIPEP	-0.744888861160591	0.337421749179937	0.0272728706108102	0.340589301865769	11.4476689	10.18161	8.7557434	11.77547	18.668277	11.4589793	30.348708	15.98252	19.694389
ENSG00000106077.18	ABHD11	-1.30035342866737	0.589167880323554	0.0273069552367551	0.340589301865769	10.16165131808	8.563552	9.515399141	33.43238407	77.5208128	18.407144	83.2896060278021	24.48382811412	36.269737117041
ENSG00000231473.2	RB1-DT	-1.70543547441505	0.772667863000707	0.0272998216110211	0.340589301865769	0	0.10307	0.108073	0.166306	0.0840887	2.030224	0.102407	0.8168493	0.809749
ENSG00000007168.12	PAFAH1B1	0.419609456877416	0.190137978350781	0.0273232690801757	0.340611698134964	61.717467	55.296946	65.374006	41.540156	28.0309896	54.943534	44.285082	52.360985	42.860242
ENSG00000180357.9	ZNF609	0.431904235787476	0.195734279084627	0.0273430974529795	0.340677859450001	10.839569	7.8128152	9.480246	5.892341	4.4207381	7.811747	8.576974	7.230602	5.28084
ENSG00000130561.16	SAG	-1.78087866478392	0.807152089214569	0.0273578862555767	0.340681193971383	0.136841	0.01766335	0	0	0.3042385	0.5542391	0.1421327	0.0410294	0.0191663
ENSG00000237649.7	KIFC1	-1.51296631149871	0.685935554577118	0.0274051897811304	0.341089208198993	2.075839	0.193767	1.076305	7.502201	9.0042	3.584377	21.574936	15.41623	11.1611
ENSG00000198815.8	FOXJ3	0.4521245664047	0.205082739912187	0.0274824641320573	0.341823743342003	16.38416	19.072354	18.506782	11.3825259	9.709967027	15.512082	13.173904	12.5524407	12.263751
ENSG00000079156.16	OSBPL6	1.09755127531042	0.497881906012991	0.0274933465617987	0.341823743342003	1.717055	3.822283	3.349622283	0.9755732428141	0.5017288	2.341797	1.1123640288	0.5954782154011	1.2659333
ENSG00000137474.20	MYO7A	-1.13242783324741	0.514121153702681	0.0276195813847136	0.343029644715069	2.2963067	0.7566707	1.883829057366	2.5267744	4.6434025	2.0897867	3.1496964	10.3112548	3.2738577
ENSG00000166501.13	PRKCB	1.40870934823347	0.639538506587857	0.0276161340950185	0.343029644715069	25.6092240203335	14.4263430140972	36.8031210129858	4.3222702694728	0.77880632463862	11.0413055	2.44470495	4.5372034	13.10859
ENSG00000138942.15	RNF185	0.767274158934478	0.34850137576878	0.0276908312410203	0.343187845613089	30.832991	39.698239	37.559178	13.7050575	11.848945	22.2696720215218	19.521673	14.178761	24.42860135
ENSG00000197208.5	SLC22A4	1.28517488977433	0.583728769494629	0.0276890185037	0.343187845613089	1.343506	5.408829	3.613417	0.641455	0.317079	1.769613	1.90154	0.785332	0.752632
ENSG00000229017.6	LINC01277	1.34028546841626	0.608715421647706	0.0276775986898127	0.343187845613089	0.388697	0.198841	0.463321	0.124883	0.0541245	0.27032	0.109658	0.0198585	0.0783293
ENSG00000235027.1	AC068580.3	-1.41812113972204	0.643974922088013	0.0276556175914095	0.343187845613089	0.554797	0.122014	0.227215	1.25767	1.64009	0.902648	1.97862	4.83407	0.789723
ENSG00000268201.1	AC020915.2	-1.33784110010875	0.607719129488674	0.0277067636616168	0.343204003307915	0.717358	0.833986	1.89556	0.894983	7.35315	1.7022	3.04733	2.99937	1.04391
ENSG00000163464.7	CXCR1	-1.72489779922104	0.783622743731076	0.0277230047049193	0.343223964845441	0.263582	0.551822	0.356069	0.188527	0.311975	0.30296	11.0606	1.60246	0.0199455
ENSG00000105472.12	CLEC11A	-0.820068980474951	0.372660517029749	0.0277658278045375	0.343572830233257	21.297184	8.64852	10.569422	8.58809	8.71731	26.867969	39.811897	22.075103	22.072793
ENSG00000184602.5	SNN	1.20014753163551	0.54559997411637	0.0278293230022464	0.34417698837939	29.5856	52.8596	24.3757	4.3348	3.87394	14.9213	14.7568	11.0788	13.9889
ENSG00000233680.4	HNRNPA1P27	-1.65016876752261	0.751359541412562	0.0280744947405777	0.344505294918032	0.199659	0	0.202519	0	0.4725	0.196956	1.15181	0.11573	0.302339
ENSG00000113811.10	SELENOK	0.509774831642984	0.232226247107154	0.0281517942210242	0.344505294918032	87.64963	85.51155	70.092361	46.723573	38.516575	60.2213	48.20846	63.403167	56.082926
ENSG00000266677.1	AC087164.1	1.4120066740147	0.643424693130744	0.0281982356352446	0.344505294918032	0.555306	0.981214	0.194819	0.085778	0.107473	0.192755	0.051795	0.117312	0.2430266
ENSG00000178201.4	VN1R1	-1.11025622416344	0.505709302697941	0.0281317964080915	0.344505294918032	0.957039	0.34799	0.641722	0.628776	2.80893	0.935005	1.18202	1.74355	0.715212
ENSG00000165046.12	LETM2	1.12060120439758	0.510408291687178	0.0281277789758905	0.344505294918032	5.267397	12.544606	2.048873	3.084603	2.4675832	2.5087102	2.0496955	3.7575769	2.162341
ENSG00000128928.8	IVD	0.559010179704505	0.25447994065111	0.0280435374798792	0.344505294918032	53.850271	34.304969	47.310467	31.735334	16.8750929	44.1550531	25.391908	31.82532	30.870471
ENSG00000160200.17	CBS	0.834760661344566	0.380216093114518	0.0281284615937375	0.344505294918032	3.4107111	4.5412296	4.724891	6.585805	1.9589358	5.193301	3.257424022	2.2381446	1.9628812
ENSG00000172209.5	GPR22	1.52137579090611	0.693124591516923	0.0281669808174509	0.344505294918032	0.273933	0.0531248	0.3923949	0.0286027	0.0530305	0.0602117	0.0703044	0.0318339	0.0166424
ENSG00000100036.12	SLC35E4	-0.926720382654064	0.421586036835811	0.0279365536723165	0.344505294918032	2.1479484	1.5987812	2.1578774	0.79551	1.30925	3.323524	7.172422	3.842969	2.4668479
ENSG00000112293.14	GPLD1	1.25429657001048	0.570741928383596	0.0279733610755227	0.344505294918032	2.69707	1.108942	2.297017	0.478785	0.229092	1.460577	0.2733679	0.305182	0.828504
ENSG00000176087.14	SLC35A4	0.321651687779168	0.146547187368916	0.0281730895487439	0.344505294918032	36.163745	37.36443	34.18486	29.35346	22.321077	32.463744	34.9167400792948	28.903092	27.867791
ENSG00000160888.6	IER2	0.954268674695658	0.434206642899959	0.0279684000857957	0.344505294918032	213.0255	118.43866	176.22011	51.34024	50.84896	57.211461	83.61593	125.705601	34.34978
ENSG00000138780.14	GSTCD	0.487838975721746	0.222274769172249	0.0281810754446202	0.344505294918032	4.4958152	2.40033	3.194462	2.0788678	1.7195623	2.0282385	2.6494703	2.4380321	2.32083466
ENSG00000163734.4	CXCL3	-1.63288846684346	0.743045362446203	0.0279803131333283	0.344505294918032	7.380289	6.160043	7.195222	33.81312	26.284299	4.150788	127.29398	236.64917	10.33975
ENSG00000234851.4	RPL23AP42	0.482252528895477	0.21964564922188	0.0281210619632668	0.344505294918032	1078.28	1260.21	1001.65	757.722	573.095	1040.71	902.737	723.249	676.359
ENSG00000048707.15	VPS13D	0.733305199300611	0.334173848525016	0.0282079327800922	0.344505294918032	31.824043896828	37.7750190197788	31.1534051	16.48127973358	11.7342135	28.9018540124214	14.019511	15.6215297	21.4222561
ENSG00000162006.9	MSLNL	-1.79559697256507	0.817973862496602	0.0281509417671782	0.344505294918032	0.0263258	0	0	0	0.5881174	0	0	1.0521707	0.0717194
ENSG00000071655.17	MBD3	0.46573201812201	0.212160476748239	0.0281501534132378	0.344505294918032	53.379957	55.41359	47.519172	44.606863	23.552007	54.282999	44.707443	39.984967	34.316963
ENSG00000080200.9	CRYBG3	0.926902990253651	0.421696763077675	0.0279468238272464	0.344505294918032	17.78004	6.96494	19.08516	4.95537	3.45166	9.41743	5.51157	4.65794	8.31962
ENSG00000254166.2	CASC19	-1.66588752169637	0.758057810262995	0.0279795353721966	0.344505294918032	0.3287383	0.2536678	0.258741	3.7158491021	8.819198458	1.4912700794	3.708609830468	20.6119804045292	0.9836021
ENSG00000203688.5	LINC02487	-1.73388570598414	0.790140846382444	0.0282066084022266	0.344505294918032	0.0814843	0	0.137025	0.0603062	0.274437	0.0190345	2.20718	0.092591	0.129406
ENSG00000276141.4	WHAMMP3	1.09650747838796	0.498694981625417	0.0278954342639532	0.344505294918032	6.063841	5.30786	6.406967	1.194791	0.6615699	3.74995	1.527705	2.183333	2.67082
ENSG00000280018.3	CU634019.6	-1.49173050254767	0.678424551126561	0.0278910351096153	0.344505294918032	0.2212743	0.498382	0.199992	3.160646	3.718008	2.217306	8.796422	3.290745	5.174336
ENSG00000279384.1	AC080188.2	1.18722871389793	0.541032145613749	0.028208289141023	0.344505294918032	1.10012	5.23485	2.88457	0.858067	0.79537	1.17654	0.970919	0.877316	1.41646
ENSG00000240661.3	AC063952.1	1.40209157620545	0.639227203332205	0.02827737545448	0.345155153123311	1.6116907	1.577879	0.66746	0.1237308	0.0643241	0.7547584	0.2804212	0.3054523	0.2895161
ENSG00000198610.10	AKR1C4	-1.80516212514141	0.823061603099985	0.0282909236373611	0.345155153123311	0	0.0799588	0	0.355711	4.436472	0	10.330511	0.396273	0.0920348
ENSG00000197467.14	COL13A1	1.35253621520727	0.616854149827848	0.0283336620233919	0.345318851242094	17.635147	4.3582555	16.534696	6.960623	0.513518862016	2.74192914074	11.863875	3.5958296	1.6149361
ENSG00000153446.15	C16orf89	1.51273280771071	0.689915870504124	0.0283337789796271	0.345318851242094	26.075955	41.971264	23.286839	84.09856	10.015188	46.170614	3.207219	2.427563	4.035707
ENSG00000183808.11	RBM12B	-0.663728590237943	0.302769355806989	0.028365638583198	0.345496222637037	2.547748	1.806563	1.757084	2.1443630322076	2.3609869	2.939538	3.597657	5.965751	2.946155
ENSG00000134138.19	MEIS2	1.12708475521016	0.514175409443565	0.0283777853041887	0.345496222637037	64.1092	33.964444352	48.710126	17.5191975	8.5325002	31.490835	7.857221	8.4441268	31.418075
ENSG00000100815.12	TRIP11	0.466046030890625	0.21265170978983	0.0284088968755506	0.3456956066376	4.55375	4.770235	5.97147	4.279531	2.399112	4.213169	3.966802	3.825036	4.511901
ENSG00000223508.5	RPL23AP53	1.03322748845438	0.471829942747727	0.0285365489426767	0.346278316100035	6.00139	3.8838	4.85335	0.965937	1.649737	1.974521	1.552394	1.413302	2.518737
ENSG00000040275.16	SPDL1	-0.914601802880769	0.417785087181053	0.0285846212834806	0.346278316100035	3.315419	1.626383	2.869928	5.572105	7.538353	4.635511	8.3636554	7.16398	7.553515
ENSG00000103066.12	PLA2G15	-0.692800328585482	0.316397430042821	0.0285494702272977	0.346278316100035	7.31533400049939	3.963958	4.017152	6.313514	9.123884	6.935451	10.53105846	12.3240444	7.726588
ENSG00000272419.6	LINC01145	0.904455105175939	0.412947817175749	0.0285067868850311	0.346278316100035	31.677052	14.104429	22.063474	8.154609	4.613921	13.357542	6.195444	12.878269	12.791331
ENSG00000183346.7	CABCOCO1	1.32717816616146	0.606266762796794	0.0285896210002032	0.346278316100035	4.142762	3.975581	1.933504	0.581506	0.691139	0.409091	0.309966	0.804412	2.1836319
ENSG00000157613.10	CREB3L1	-1.52739596179352	0.697419822513887	0.0285193964532412	0.346278316100035	8.532008	4.978415	6.3810183	56.166797	111.510587	13.84323	67.408115	64.03584	162.080213
ENSG00000163755.8	HPS3	-0.805127154030002	0.367726817375693	0.02856263369211	0.346278316100035	10.173402	3.738714	6.3960188	7.19944966	10.1526101216	9.181693	9.9737961	21.018947	13.829911
ENSG00000135211.5	TMEM60	-0.68350051525547	0.312189131450168	0.0285692612375964	0.346278316100035	13.1281	6.96912	7.36932	11.5281	11.3687	14.0929	27.4101	16.0848	17.0857
ENSG00000184224.3	C11orf72	-0.66965134212488	0.305732150221718	0.0285010139232814	0.346278316100035	1.85082	1.17853	1.42282	0.979529	2.77413	1.92426	2.41486	2.31341	1.7230035
ENSG00000164983.7	TMEM65	-0.725033042950316	0.331254757353132	0.028615192878503	0.346409205429596	2.64694	1.17106	1.64298	1.40363	1.68448	2.84755	5.70031	2.54502	2.70281
ENSG00000174238.14	PITPNA	0.75691898307266	0.346039727629792	0.0287150893004701	0.346767263496527	45.198915	81.0214	57.709496	27.229987	25.569684	43.568532	39.915516	25.5638112024	29.086779
ENSG00000147576.16	ADHFE1	1.2258833426354	0.560294875789089	0.0286750429590867	0.346767263496527	37.720115344	18.9784848	34.323187605233	10.487728	3.7002656	23.150892699	3.650935	4.3819099	14.8069756753
ENSG00000096717.11	SIRT1	0.742136545591127	0.339289279696251	0.0287186732438409	0.346767263496527	13.19418	17.91923	16.084445	5.69329500140056	5.33420000314585	10.641875	7.81977650565	8.25754471328	8.92401020139013
ENSG00000233237.6	LINC00472	1.03093868486772	0.471158448563467	0.0286628006251359	0.346767263496527	1.056834	2.17878719	1.230985	0.454989	0.258816	1.0101183	0.629111	0.684697	0.4959415
ENSG00000260495.1	AC009148.1	-1.19665889786806	0.547058989433272	0.028710394538428	0.346767263496527	0.302386	0.116867	0.0408469	0.251674	0.699903	0.337613	0.522005	0.315135	0.439321
ENSG00000162654.8	GBP4	-1.15542129001305	0.528650478224427	0.0288444941247059	0.347391979366221	15.56927	4.96548	4.934403	9.03959	12.55995	9.80122	17.35554	56.7942	15.35493
ENSG00000196132.12	MYT1	-1.58559343170554	0.725348121925448	0.0288173768252895	0.347391979366221	0.0942032119974	0.02729830109148	0.0763299013731	0.01470150340169	0.26832130341503	0.00927745126157	0.6797730268086	0.15538393104204	0.082122610155601
ENSG00000100380.13	ST13	0.855473402479815	0.391484871231825	0.0288740616241478	0.347391979366221	165.629435	170.891629	192.413815	57.18072	46.581956	137.912772	75.55767267	58.79069018	94.14385
ENSG00000103489.11	XYLT1	1.11078901783034	0.508053833723119	0.0287892146252617	0.347391979366221	4.8705179	6.795739	11.5869793	2.0767829	2.14033	2.90574	5.035423	0.93491	3.12154
ENSG00000124243.17	BCAS4	0.91655423427495	0.419422364930765	0.0288685100761322	0.347391979366221	7.05676	11.94653	4.593193	3.348792	3.396758	4.463254	2.334055	4.437847	3.274113
ENSG00000237061.1	AC100823.1	1.71639204244809	0.785392392905785	0.0288599499630351	0.347391979366221	4.11887	2.43029	0.182161	0.139636	0	0.708924	0.173234	0.156124	0.48893
ENSG00000262587.2	AC133552.2	-0.738971653349349	0.338091905499282	0.0288366567656884	0.347391979366221	0.906005	0.876308	1.40889	1.185888	1.5725	1.66806	2.43839	1.73867	2.524117
ENSG00000124207.16	CSE1L	-0.582480747984197	0.266747030430204	0.0289883638170633	0.348436209888344	22.160773	20.346894	23.33082	16.901733	25.685856	23.025613	38.1325	48.674956	30.26772
ENSG00000249264.1	EEF1A1P9	0.941854660453399	0.431328189792598	0.0289905580197795	0.348436209888344	0.849788	0.780416	0.904437	0.629809	0.0670431	0.586411	0.571171	0.406144	0.540309
ENSG00000163191.5	S100A11	-1.05440847479755	0.483108403436127	0.0290689304018323	0.348817061907376	344.185	452.786629	230.847105	585.81	1410.83861	411.381973	823.496	1241.73323	838.499
ENSG00000236780.5	LINC01829	1.72521771835916	0.790560454383787	0.0290894852618399	0.348817061907376	7.898375	13.746999	4.746696	0.3579484	0.2818415	0.133804	0	3.850342	1.1319397
ENSG00000112877.7	CEP72	-1.16728693327002	0.534748045094872	0.0290451826389738	0.348817061907376	1.583108	1.382652	1.6590279	4.264078	3.981143	2.983124	15.54928	4.866112	4.825445
ENSG00000164326.4	CARTPT	1.79057147779196	0.820544226307432	0.0290965854035521	0.348817061907376	43.560255	10.667091	103.653	0.1644560212232	0	7.76509	0.13516300885876	1.46654	10.340899
ENSG00000007350.16	TKTL1	-1.57031015019361	0.719474425409619	0.0290667889151378	0.348817061907376	0.446063	0.143667	0.0645609	0.0331477	1.1398275	0.209262	1.80433	0.1810348	0.1890516
ENSG00000101290.13	CDS2	0.516041030798703	0.236567271434201	0.0291559726369521	0.348885208927172	18.091796	15.286186	19.396179	8.772272	7.048969	13.567852	12.430576	12.27969	11.134244
ENSG00000185658.13	BRWD1	0.519268312001974	0.238123557060893	0.0292080154023695	0.348885208927172	16.3204989	15.2418501	14.9684907	8.0236578	9.4789135	10.1576223	10.1569351	10.1370408	8.9148
ENSG00000246089.3	AC016065.1	-1.11624852871161	0.511705687031711	0.0291518589477359	0.348885208927172	1.48012	1.1136701	1.309951	2.916645	3.535722	1.9641239	3.829557	3.530081	9.020898
ENSG00000167074.14	TEF	1.03674575985139	0.475249558143691	0.0291481881083238	0.348885208927172	14.14742	4.69234	13.74404	4.94127	1.49403	5.43321	6.7889122325	2.18500105423	6.440926152
ENSG00000104147.8	OIP5	-1.59898478883492	0.733382317410091	0.0292361076147999	0.348885208927172	0.528263	0	0.311408	2.00794	1.70621	1.17137	3.44085	8.689537	4.043996
ENSG00000198959.11	TGM2	1.48862438959767	0.682725286344235	0.0292267203673091	0.348885208927172	236.918862	814.722891	136.898416	24.687357	21.214958	116.731365	68.885841	204.455912	47.305731
ENSG00000141738.13	GRB7	-1.75947685370047	0.806969407856764	0.0292314259603152	0.348885208927172	0.1219131	0.4826412	0.5342081	15.8977568016916	107.101859	1.9279194	45.897142	28.383647	8.573583
ENSG00000224032.6	EPB41L4A-AS1	0.840412881493703	0.385404803736021	0.0292131752428267	0.348885208927172	51.394219	84.32509	48.41274	29.36356	14.176896	46.469966	32.14064	25.95137	38.55329
ENSG00000181350.11	LRRC75A	-1.26950743011771	0.582250225214938	0.0292317625539213	0.348885208927172	1.160586	0.917376	0.801747	2.099475	3.403393	1.391603	11.05497	1.672299	2.150072
ENSG00000162729.13	IGSF8	-0.717586461237216	0.329211585218297	0.0292788123459308	0.349039744130022	18.203263	14.08352	14.104625	13.639361	34.17569	19.64345	34.102662	23.715602	17.771869
ENSG00000009413.15	REV3L	0.992267300439958	0.45519386301435	0.0292664714552738	0.349039744130022	23.18171085663	40.191999	31.4726768	8.5608187962	7.809618502246	24.2350413369324	10.2460880663495	9.49274253	13.83884582193
ENSG00000215270.3	AP000523.1	-1.71944417479146	0.789006512156008	0.0293129382904086	0.34926909356591	0.046113	0.114588	0.120056	0	0.489892	0.0583786	1.59742	0.0946272	0.0705786
ENSG00000079462.7	PAFAH1B3	-1.32877803287862	0.609877561949314	0.0293493561333246	0.34952550469235	9.630959	1.662497	4.8068427	17.148187	43.68341	9.293073	33.78955	26.19588	17.057628
ENSG00000185633.10	NDUFA4L2	-0.88886578166076	0.408064200789122	0.0293874410446151	0.349801498908024	24.727457086	9.251501699	11.147628485	8.915768988	10.45787505	40.765157822	36.09905369	36.10140567	15.81141
ENSG00000122257.19	RBBP6	0.807409110093493	0.370767064058402	0.0294304536470561	0.350135838242183	31.6270765	70.8064632019	45.705213	20.8142044	19.185114	28.7051960736697	27.50804101	29.9834	20.876635
ENSG00000116833.13	NR5A2	-1.30599370739999	0.599888602674522	0.0294760629084085	0.350500715607791	1.4722757	0.5091946	0.990272	0.2916421	3.1447688	2.4132167	4.148064	1.8805377	0.2386392
ENSG00000280367.1	AP002364.1	-0.937923209599849	0.430876858167682	0.0294971449719848	0.350531709909492	0.205066	0.106676	0.0958763	0.172319	0.248945	0.295221	0.529361	0.369844	0.15755
ENSG00000169330.8	KIAA1024	-1.12601081961325	0.517367147923957	0.0295234925527964	0.350531709909492	0.269292	0.118906	0.171434	0.3397886	0.9280803	0.234886	0.7499259	0.420834	0.419122
ENSG00000106367.14	AP1S1	-0.831388155366087	0.381979139859039	0.0295158293088939	0.350531709909492	32.925875	15.50717186	23.34076	39.459117	47.888139	36.4146903	82.812457	68.955317	39.526049
ENSG00000134333.13	LDHA	0.959171579391998	0.440841403361167	0.0295721101367671	0.350672905774546	597.496845	906.807992	492.6844815229	144.266097	157.4966244	372.21437644	314.356603	260.558545	290.950889
ENSG00000100647.7	SUSD6	0.776432064311275	0.356870942841444	0.0295802259293222	0.350672905774546	25.79393	44.66278	36.55279	14.248582	11.974103	23.368632	21.48226	22.71868	13.548672
ENSG00000102900.12	NUP93	-0.667135618540751	0.306626346768246	0.0295755831785806	0.350672905774546	23.41414	20.4258949	19.876047	33.1415939	36.2226068	34.73167924	46.060291	56.72111653	37.58282
ENSG00000101220.17	C20orf27	1.20842386133704	0.55553411847428	0.0296116203798444	0.3508677907735	253.7607	128.896718	192.36597	23.771131	23.665848	103.7145	37.152771	35.777677	91.501652
ENSG00000141646.13	SMAD4	0.561829131087966	0.258312692971186	0.0296303995629429	0.350913076297932	27.505203	23.3718138387	29.03704	14.4447733	9.9188368	24.5413600008145	16.475679	16.109266	17.039182
ENSG00000137285.9	TUBB2B	1.40589369356071	0.646807946277281	0.0297361249159643	0.351019762238968	10.42769	21.893267	10.005557	3.2162255381	3.20241	7.85174	0.695469	0.794209	5.39823
ENSG00000087237.11	CETP	-1.15410279162926	0.530941513082966	0.0297283485804364	0.351019762238968	1.42392	0.1645445	0.674985	0.370153	0.649163549	1.1545374	2.622395	2.839732	1.195325
ENSG00000165572.7	KBTBD6	-0.824084101321785	0.379075892594385	0.0297104627457424	0.351019762238968	2.55741	0.819182	1.58807	1.28465	1.5115	2.63467	5.26132	2.18972	3.51
ENSG00000161133.16	USP41	-1.46354424009088	0.673268616455032	0.0297209484620143	0.351019762238968	4.60511	1.04006	0	1.65165	9.0476623	3.52598	12.2156	4.973554	6.1996356
ENSG00000279048.1	AC080080.1	-1.20871810607155	0.555916765100555	0.0296841942169419	0.351019762238968	0.135828	0.153121	0.0229364	0.282619	0.303667	0.356853	0.716559	0.589848	0.267236
ENSG00000279786.1	AC105235.1	-1.07986431350696	0.496836345212729	0.0297441408009491	0.351019762238968	0.24879	0.0901692	0.126062	0.169852	0.490758	0.367759	0.537181	0.297174	0.197697
ENSG00000156853.12	ZNF689	0.735179745495648	0.338222300583396	0.0297307988562696	0.351019762238968	5.9636342	5.19321	7.418579	2.77681	1.45737	4.62934	3.39757	3.25969	3.9674
ENSG00000119888.10	EPCAM	-1.75130252269385	0.806104071697297	0.0298140977282683	0.351474382423734	2.4732	2.750922	0.580985	115.290842	398.730346	21.097923	755.840569	251.571828	67.010575
ENSG00000111665.11	CDCA3	-1.43621244420606	0.661221354455418	0.0298511388109996	0.351474382423734	3.532998292	0.3741839	2.2002998	11.065963	9.938923406403	6.1062978	26.74449	27.807295	15.7116041
ENSG00000276775.1	IGHV4-4	-1.78619203699596	0.822505304617822	0.0298822201312668	0.351474382423734	0.688187	0	0	1.43181	0	0.454745	0.890029	58.0489	11.7068
ENSG00000165197.4	VEGFD	1.41995071798607	0.653849508360299	0.0298799445939698	0.351474382423734	9.29425	9.12482	2.807099	1.566298	0.496486	6.021395	0.971168	0.532073	1.19027
ENSG00000265293.2	ARGFXP2	-1.47646462577598	0.679901224486741	0.0298868322919272	0.351474382423734	0.0670855	0.0648927	0	0.20933	0.423361	0.198536	0.258016	0.524963	0.304761
ENSG00000272040.1	AC010245.2	-0.660317541040963	0.304072724469882	0.0298875321996227	0.351474382423734	1.40316	0.804068	1.42273	1.21635	1.27104	3.02343	2.54638	1.85197	1.8411
ENSG00000273038.2	AL365203.2	1.16371570151386	0.535845376952965	0.0298754398045389	0.351474382423734	6.3598	10.8536	7.54127	0.802408	1.60154	4.05328	3.06383	2.13918	2.7771
ENSG00000236333.3	TRHDE-AS1	1.32334159901061	0.609517682815256	0.0299214122970273	0.35169651999026	0.5178725	0.1971491	0.3415461	0.4133542	0.0832063	0.422063	0.047187	0.1083747	0.032996
ENSG00000213523.10	SRA1	0.54948957919389	0.253398396724952	0.0301221175594729	0.351947074679532	66.29387	59.973189	51.565256	31.18861	25.897185	41.480167	32.23593	44.720433	41.169845
ENSG00000156515.23	HK1	0.873020699246092	0.40266267314867	0.0301496133704938	0.351947074679532	79.050516	84.956749	85.832492	33.956247	30.47615807271	62.434271	19.8592322	31.305628	49.194978
ENSG00000173011.11	TADA2B	0.521784883784925	0.240658557048529	0.030146949054479	0.351947074679532	11.823646	9.10731	13.803981	8.420794	4.219401	8.925522	8.130137	10.18195	8.425222
[truncated: 33,281 more rows]
